1 **A nematode-specific gene underlies bleomycin-response variation in *Caenorhabditis elegans***

2

3 Shannon C. Brady<sup>\*,†</sup>, Stefan Zdraljevic<sup>\*,†</sup>, Karol W. Bisaga<sup>‡</sup>, Robyn E. Tanny<sup>\*</sup>, Daniel E.

4 Cook<sup>§</sup>, Daehan Lee<sup>\*</sup>, Ye Wang<sup>\*</sup>, Erik C. Andersen<sup>\*,†,\*\*,1</sup>

5

6 <sup>\*</sup>Molecular Biosciences, Northwestern University, Evanston, IL 60208

7 <sup>†</sup>Interdisciplinary Biological Sciences Program, Northwestern University, Evanston, IL 60208

8 <sup>‡</sup>Weinberg College of Arts and Sciences, Northwestern University, Evanston, IL 60208

9 <sup>§</sup>The Francis Crick Institute, London NW1 1ST, UK

10 <sup>\*\*</sup>Robert H. Lurie Comprehensive Cancer Center, Northwestern University, Chicago, IL 60611

11 <sup>1</sup>Corresponding author

12

13 Shannon: 0000-0002-3043-1544

14 Stefan:0000-0003-2883-4616

15 Karol: 0000-0002-7680-6022

16 Robyn: 0000-0002-0611-3909

17 Dan: 0000-0003-3347-562X

18 Daehan: 0000-0002-0546-8484

19 Ye: 0000-0002-5423-6196

20 Erik: 0000-0003-0229-9651

21

22 **Running title: (35 characters):** Wild bleomycin response variation

23 **Keywords: (5)**

24 *C. elegans*, bleomycin, QTL, drug-response, linkage mapping

25

26 **Corresponding author:**

27 Erik C. Andersen

28 Department of Molecular Biosciences

29 Northwestern University

30 4115 Pancoe NSUHS Life Sciences Pavilion

31 2205 Tech Drive

32 Evanston, IL 60208

33 847-467-4382

34 [erik.andersen@northwestern.edu](mailto:erik.andersen@northwestern.edu)

35

36 **Article summary (100 words):**

37 We performed linkage mapping on a panel of recombinant lines generated between two  
38 genetically divergent strains of *Caenorhabditis elegans* and identified a bleomycin-response  
39 QTL. We generated CRISPR-Cas9 deletions and reciprocal allele-replacement strains for all six  
40 candidate genes across the QTL confidence interval. Deletions of one gene, *H19N07.3*, caused  
41 increased bleomycin sensitivity in both divergent genetic backgrounds. This gene might act in  
42 stress responses and detoxification in nematodes. We further compared our linkage mapping to a  
43 genome-wide association mapping and showed that a rare expression variant in the CB4856  
44 strain likely underlies bleomycin-response differences.

45

## ABSTRACT

46

47 Bleomycin is a powerful chemotherapeutic drug used to treat a variety of cancers. However,  
48 individual patients vary in their responses to bleomycin. The identification of genetic differences  
49 that underlie this response variation could improve treatment outcomes by tailoring bleomycin  
50 dosages to each patient. We used the model organism *Caenorhabditis elegans* to identify genetic  
51 determinants of bleomycin-response differences by performing linkage mapping on  
52 recombinants derived from a cross between the laboratory strain (N2) and a wild strain  
53 (CB4856). This approach identified a small genomic region on chromosome V that underlies  
54 bleomycin-response variation. Using near-isogenic lines and strains with CRISPR-Cas9  
55 mediated deletions and allele replacements, we discovered that a novel nematode-specific gene  
56 (*scb-1*) is required for bleomycin resistance. Although the mechanism by which this gene causes  
57 variation in bleomycin responses is unknown, we suggest that a rare variant present in the  
58 CB4856 strain might cause differences in the potential stress-response function of *scb-1* between  
59 the N2 and CB4856 strains, thereby leading to differences in bleomycin resistance.

60  
61  
62  
63  
64  
65  
66  
67  
68  
69  
70  
71  
72  
73  
74  
75  
76  
77  
78  
79  
80  
81  
82

## INTRODUCTION

Cancer is the second leading cause of death worldwide (World Health Organization, 2018), which has led to extensive research for treatments, including the identification of over 100 effective chemotherapeutic drugs (Santos *et al.* 2017). One of these drugs is bleomycin, an anti-tumor antibiotic that interacts with oxygen and transition metals to cause double-stranded DNA breaks (Chen and Stubbe 2005). Although the cytotoxicity of bleomycin can reliably induce cell death in tumor cells, off-target effects can lead to a range of harmful consequences from mild gastrointestinal irritation to severe bleomycin-induced pulmonary fibrosis (Blum *et al.* 1973). The tradeoff between efficacy and toxicity varies across individuals, and understanding the genetic variants that affect bleomycin response might yield opportunities to broaden the therapeutic range (Relling and Dervieux 2001; de Haas *et al.* 2008).

Bleomycin sensitivity has been shown to be heritable, suggesting that genetic markers can be used to predict bleomycin responses (Cloos *et al.* 1999). Many studies have attempted to identify the genetic variant(s) that underlie bleomycin-response differences across cancer patients, and some have identified potential connections between the metabolic enzyme bleomycin hydrolase (BLMH) and patient outcomes. However, none of these studies established a causal connection between genetic differences in BLMH and variation in bleomycin responses (Lazo and Humphreys 1983; Nuver *et al.* 2005; de Haas *et al.* 2008; Gu *et al.* 2011; Altés *et al.* 2013). The inability to identify a human genetic variant that causes differences in bleomycin responses might be attributed to limited sample sizes (Sham and Purcell 2014), confounding environmental factors (Hunter 2005; Liu *et al.* 2013), variation in drug regimens across patients (Low *et al.*

83 2013), or tumor complexity and progression (McClellan and King 2010; Dagogo-Jack and Shaw  
84 2018). However, the DNA-damage pathways that might be implicated in bleomycin responses  
85 are evolutionarily conserved across eukaryotes (Taylor and Lehmann 1998). Therefore, studying  
86 bleomycin responses in a model organism with natural genetic variation can offer insights into  
87 how bleomycin response differs across individuals and can potentially be applied to the clinic  
88 (Zdraljevic and Andersen 2017).

89

90 *Caenorhabditis elegans* is a soil-associated microscopic roundworm that is an excellent model  
91 for basic cellular and organismal processes (A. K. Corsi, B. Wightman, M. A. Chalfie 2015). Not  
92 only does *C. elegans* have a well annotated reference genome (*C. elegans* Sequencing  
93 Consortium 1998; Stein *et al.* 2001; Hillier *et al.* 2005); [www.wormbase.org](http://www.wormbase.org) WS268), but this  
94 species also has broad genomic diversity across global populations (Cook *et al.* 2017). Notably,  
95 the N2 strain and the CB4856 strain are well characterized and genetically divergent with  
96 approximately one single nucleotide variant per 850 bp (Wicks *et al.* 2001; Swan *et al.* 2002;  
97 Thompson *et al.* 2015). These two strains were used to generate a panel of recombinant inbred  
98 advanced intercross lines (RIAILs) (Rockman and Kruglyak 2009; Andersen *et al.* 2015), which  
99 has been used to correlate genetic variants with differences in quantitative traits (Kammenga *et*  
100 *al.* 2007; Seidel *et al.* 2008, 2011; Palopoli *et al.* 2008; Reddy *et al.* 2009; McGrath *et al.* 2009;  
101 Bendesky *et al.* 2011, 2012; Andersen *et al.* 2014; Schmid *et al.* 2015; Zdraljevic *et al.* 2017,  
102 2019; Lee *et al.* 2017).

103

104 Here, we used a high-throughput fitness assay to measure bleomycin responses across a panel of  
105 249 RIAILs (Andersen *et al.* 2015) and then performed linkage mapping to identify quantitative  
106 trait loci (QTL) that underlie bleomycin-response variation. We used near-isogenic lines (NILs)  
107 to validate the largest effect QTL on chromosome V. Our results from the NIL assays suggested  
108 that epistatic loci underlie bleomycin responses, but a two-factor genome scan was unable to  
109 detect significant genetic interactions. Next, we created and tested CRISPR-Cas9 mediated  
110 deletion alleles to investigate all six candidate genes in the QTL region. We identified a  
111 nematode-specific gene, *H19N07.3*, that underlies this QTL. Although this gene does not contain  
112 a protein-coding variant between the N2 and CB4856 strains, its gene expression varies across  
113 the RIAIL panel. Interestingly, a genome-wide association (GWA) approach identifies different  
114 QTL than the linkage mapping approach, suggesting that both common and rare variants underlie  
115 bleomycin response variation. Given the genetic complexity underlying the bleomycin response  
116 phenotype, this study highlights the power of the *C. elegans* model system to identify elusive  
117 causal genes.

118

119

## MATERIALS AND METHODS

120

121 **Strains:** Animals were grown at 20° on 6 cm plates of modified nematode growth medium  
122 (NGMA), which contained 1% agar and 0.7% agarose, spotted with OP50 bacteria (Ghosh *et al.*  
123 2012). The two parental strains used in this study were N2 and CB4856. N2 is the canonical  
124 laboratory strain of *C. elegans* that has been extensively studied (Brenner 1974). CB4856 is a  
125 well studied Hawaiian wild isolate that is genetically divergent from N2 and has a characterized  
126 genome (Wicks *et al.* 2001; Swan *et al.* 2002; Thompson *et al.* 2015). The N2 and CB4856

127 strains were crossed for several generations to create a panel of recombinant inbred advanced  
128 intercross lines (RIAILs) that contain regions of the genome derived from each parental strain.  
129 These RIAILs were constructed previously (Rockman and Kruglyak 2009; Andersen *et al.* 2015)  
130 and have well characterized genotypes and allele frequencies, and we used this panel of RIAILs  
131 in our study to identify regions of the genome correlated with drug response. The construction of  
132 near-isogenic lines (NILs), as well as CRISPR-Cas9 mediated deletion and allele-replacement  
133 strains, is detailed below. All strains and reagents used in strain constructions are listed in the  
134 **Supplementary Information.**

135

136 **High-throughput fitness assays:** We used the high-throughput assay (HTA) described  
137 previously (Evans *et al.* 2018) and following is a summary of that assay (**Figure S1**).  
138 Populations of each strain were passaged on 6 cm plates for four generations to amplify animal  
139 numbers and reduce the effects of starvation (Andersen *et al.* 2014). Gravid adults were bleached  
140 for stage synchronization, and approximately 25 embryos from each strain were aliquoted into  
141 96-well plates at a final volume of 50  $\mu$ L of K medium (Boyd *et al.* 2012). The following day,  
142 arrested L1 larvae were fed 5 mg/mL HB101 bacterial lysate in K medium (Pennsylvania State  
143 University Shared Fermentation Facility, State College, PA; (García-González *et al.* 2017) and  
144 were grown for 48 hours at 20° with constant shaking. A large-particle flow cytometer (COPAS  
145 BIOSORT, Union Biometrica, Holliston, MA) was used to sort three L4 larvae into each well of  
146 a 96-well plate that contained 50  $\mu$ L K medium plus HB101 lysate at 10 mg/mL, 50  $\mu$ M  
147 kanamycin, and either 1% distilled water (control) or 1% distilled water and bleomycin (drug).  
148 The sorted L4 larvae were grown and propagated for 96 hours at 20° with constant shaking. The  
149 population of parents and progeny were treated with sodium azide (50 mM in M9) and quantified

150 by the BIOSORT for several fitness parameters. Because bleomycin exposure can affect animal  
151 proliferation (brood size), animal growth (length), and animal development (optical density), the  
152 fitness parameters we measured with the BIOSORT included brood size (n), animal length (time  
153 of flight, TOF), and optical density (extinction time, EXT).

154

155 **Bleomycin-response trait measurements and processing:** Phenotypic measurements collected  
156 by the BIOSORT were processed using the R package *easysorter* (Shimko and Andersen 2014).  
157 Using this package, *read\_data* imported measurements from the BIOSORT and  
158 *remove\_contamination* was used to remove contaminated wells from analysis. The *sumplate*  
159 function then calculated normalized measurements (norm.n -- brood size normalized to number  
160 of animals sorted, norm.EXT -- EXT normalized by TOF measurements) and summary statistics  
161 (mean, median, 10<sup>th</sup>, 25<sup>th</sup>, 75<sup>th</sup>, 90<sup>th</sup> percentile, interquartile range, covariance, and variance) of  
162 each trait for the population of animals. A total of 26 HTA traits were measured. When strains  
163 were phenotyped across multiple days, the *regress(assay=TRUE)* function was used to fit a  
164 linear model with the phenotype as the dependent variable and assay as the independent variable  
165 (*phenotype ~ assay*) to account for variation among assay days. Next, the *prune\_outliers()*  
166 function removed phenotypic values that were beyond two standard deviations of the mean  
167 (unless at least 5% of the strains were outside this range in the case of RIAIL assays). Finally,  
168 bleomycin-specific effects were calculated using the *regress(assay=FALSE)* function from  
169 *easysorter*, which fits a linear model with the phenotype as the dependent variable and control  
170 phenotype as the independent variable (*phenotype ~ control phenotype*). The residual phenotypic  
171 values account for differences among strains that were present in control conditions.

172



173 **Bleomycin dose response:** A dose-response high-throughput assay was performed using  
174 quadruplicates of four genetically divergent strains (N2, CB4856, JU258, and DL238) tested in  
175 various concentrations of bleomycin (**File S1**). The broad-sense heritability at each concentration  
176 was calculated using the *lmer* function within the *lme4* R package with the phenotype as the  
177 dependent variable and strain as a random effect  $phenotype \sim 1 + (1/strain)$  (**File S2**). The  
178 concentration of bleomycin that provided the highest mean broad-sense heritability across the 26  
179 HTA traits was selected for linkage mapping experiments (50  $\mu$ M, mean  $H^2 = 0.58$ ). Bleomycin  
180 sulfate was purchased from Biotang Inc via Fisher Scientific (Catalog No. 50-148-546).

181  
182 **Whole-genome sequence library prep and analysis:** Whole-genome sequencing was  
183 performed on recombinant advanced intercross lines (RIAILs) and near-isogenic lines (NILs)  
184 using low-coverage sequencing. DNA was isolated from 100-300  $\mu$ L of packed worms using  
185 Omega BioTek's EZ 96 Tissue DNA Kit (catalog no. D1196-01). All samples were diluted to 0.2  
186 ng/ $\mu$ L and incubated with diluted Illumina transposome (catalog no. FC-121-1031). Tagmented  
187 samples were amplified with barcoded primers. Unique libraries (192) were pooled by adding 8  
188  $\mu$ L of each library. The pooled material was size-selected by separating the material on a 2%  
189 agarose gel and excising the fragments ranging from 400-600 bp. The sample was purified using  
190 Qiagen's Gel Extraction Kit (catalog no. 28706) and eluted in 30  $\mu$ L of buffer EB. The  
191 concentration of the purified sample was determined using the Qubit dsDNA HS Assay Kit  
192 (catalog no. Q32851). RIAILs and NILs were sequenced at low coverage (mean = 2.13x) using  
193 the Illumina HiSeq 2500 platform with a paired-end 100 bp reaction lane. RIAIL and NIL  
194 genotypes were imputed using VCF-kit (Cook and Andersen 2017). To determine genotypes, a  
195 list of filtered, high-quality sites ( $n = 196,565$ ) where parental strains possess different genotypes

196 was extracted from a previously established variant dataset (Cook *et al.* 2016). All RIAIL  
197 genotypes can be accessed by downloading the *linkagemapping* R package at  
198 [github.com/AndersenLab/linkagemapping](https://github.com/AndersenLab/linkagemapping) and by running  
199 `load_cross_obj("N2xCB4856cross_full")`. NIL genotypes are described below and are available  
200 in **File S5** and **File S6**.

201  
202 **Linkage mapping:** Linkage mapping was performed on each of the 26 HTA traits described  
203 above using the R package *linkagemapping* ([www.github.com/AndersenLab/linkagemapping](https://www.github.com/AndersenLab/linkagemapping),  
204 **Figure S4, Figure S5, File S4**). The function `load_cross_obj("N2xCB4856cross_full")` was  
205 executed to load a cross object containing 13,003 SNPs that describe locations of genetic  
206 recombination in the RIAIL panel (out of the 195,565 high-quality SNPs at which genotypes  
207 were called). The genotypic data and residual phenotypic data (after control-condition  
208 regression) were merged into a cross object using the *merge\_pheno* function with `set = 2` to  
209 include strains with a reduced allele-frequency skew on chromosome I. The *fsearch* function was  
210 used to calculate logarithm of odds (LOD) scores for each marker and each trait as  $-n(\ln(1 -$   
211  $R^2)/2\ln(10))$ , where  $R$  is the Pearson correlation coefficient between RIAIL genotypes at the  
212 marker and trait values (Bloom *et al.* 2013; Zdraljevic *et al.* 2017; Lee *et al.* 2017; Evans *et al.*  
213 2018). A 5% genome-wide error rate was calculated by permuting phenotype and genotype data  
214 1,000 times. Mappings were repeated iteratively, each time using the marker with the highest  
215 LOD score as a cofactor until no significant QTL were detected. The *annotate\_lods* function was  
216 used to calculate the percent of variance in RIAIL phenotypes explained by each QTL and a 95%  
217 confidence interval around each peak marker, defined by any marker on the same chromosome  
218 within a 1.5-LOD drop from the peak marker.

219  
220 **Generation of near-isogenic lines (NILs):** A near-isogenic line (NIL) is genetically identical to  
221 another strain aside from a small genomic region that is derived from an alternate strain. NILs  
222 are used to test the effect of modifications to particular genomic regions in a consistent genetic  
223 background. To make each NIL, males and hermaphrodites of the desired RAIL (QX131 for  
224 ECA230 and QX450 for ECA232) and parental background (CB4856 for ECA230 and N2 for  
225 ECA232) were crossed in bulk, then male progeny were crossed to the parental strain in bulk for  
226 another generation. For each NIL, eight single-parent crosses were performed followed by six  
227 generations of propagating isogenic lines to ensure homozygosity of the genome. For each cross,  
228 PCR was used to select non-recombinant progeny genotypes within the introgressed region by  
229 amplifying insertion-deletion (indel) variants between the N2 and CB4856 genotypes on the left  
230 and right side of the introgressed region. NIL strains ECA411 and ECA528 were generated by  
231 crossing ECA230 and CB4856 in bulk. Heterozygous F1 hermaphrodites were crossed to  
232 CB4856 males and the F2 L4 hermaphrodites were placed into individual wells of a 96-well  
233 plate with K medium and 5 mg/mL bacterial lysate and grown to starvation. After starvation,  
234 each well of the 96-well plate was genotyped to identify recombinants in the desired region.  
235 Recombinant strains were plated onto 6 cm plates and individual hermaphrodites were  
236 propagated for several generations to ensure homozygosity across the genome. NIL strains were  
237 whole-genome sequenced as described above to confirm their genotypes (**File S5, File S6**).  
238 Reagents used to generate all NIL strains and a summary of each introgressed region are detailed  
239 in the **Supplementary Information**.

240

241 **Two-factor genome scan:** We performed a two-factor genome scan to identify potentially  
242 epistatic loci that might contribute to traits of interest (either bleomycin responses or gene-  
243 expression levels). We used the *scantwo* function in the R *qtl* package to perform this analysis.  
244 Each pairwise combination of loci was tested for correlations with trait variation in the RIAILs.  
245 The summary of each scantwo output includes the maximum interactive LOD score for each pair  
246 of chromosomes. To determine a threshold for significant interactions, we performed 1000  
247 permutations of the scantwo analysis and selected the 95<sup>th</sup> percentile from these permutations.  
248 For the bleomycin-response variation scantwo, the significant interaction threshold was a LOD  
249 score of 4.08. The significant interaction threshold for the *scb-1* expression variation scantwo  
250 was 4.05. The bleomycin-response variation scantwo summary is available as **File S8**, and the  
251 scantwo summary for *scb-1* expression variation is available as **File S17**.

252

253 **Identification of genes with non-synonymous variants:** The *get\_db* function within the *cegwas*  
254 R package was used to query WormBase build WS245 for genes in the QTL confidence interval  
255 (V:11,042,745-11,189,364). Our initial linkage mappings used the 1,454 marker set (Rockman  
256 and Kruglyak 2009) and had a QTL confidence interval larger than the interval found using the  
257 whole-genome marker set (described above). Because this confidence interval was larger and  
258 more conservative, we kept it for subsequent testing of candidate genes. This expanded interval  
259 contained an additional 20 kb on either side of the whole-genome marker set confidence interval  
260 (**File S9**). The *snpeff* function within the *cegwas* R package was used to identify variants within  
261 the region of interest (**File S11**). We identified variants predicted to have MODERATE (coding  
262 variant, inframe insertion/deletion, missense variant, regulatory region ablation, or splice region  
263 variant) or HIGH (chromosome number variant, exon loss, frameshift variant, rare amino acid

264 variant, splice donor/acceptor variant, start loss, stop loss/gain, or transcript ablation) phenotypic  
265 effects according to Sequence Ontology (Eilbeck *et al.* 2005) and selected variants at which the  
266 CB4856 strain contains the alternate allele. This search found five candidate genes in the  
267 interval: *C45B11.8*, *C45B11.6*, *jmjd-5*, *srg-42*, and *cnc-10*, which each contain one non-  
268 synonymous variant between the N2 and CB4856 strains.

269

270 **Generation of deletion strains:** Deletion alleles for genes of interest were generated to test the  
271 effects of loss-of-function variants on bleomycin responses. For each desired deletion, we  
272 designed a 5' and a 3' guide RNA with the highest possible on-target and off-target scores,  
273 calculated using the Doench algorithm (Doench *et al.* 2016). The N2 and CB4856 L4  
274 hermaphrodite larvae were picked to 6 cm agar plates seeded with OP50 *E. coli* 24 hours before  
275 injection. The CRISPR injection mix was assembled by first incubating 0.88  $\mu\text{L}$  of 200  $\mu\text{M}$   
276 AltR® CRISPR-Cas9 tracrRNA (IDT, catalog no. 1072532), 0.82  $\mu\text{L}$  of each of the 5' and 3'  
277 AltR® CRISPR-Cas9 crRNAs at a stock concentration of 100  $\mu\text{M}$  in Duplex Buffer (IDT), and  
278 0.12  $\mu\text{L}$  of 100  $\mu\text{M}$  *dpy-10* co-injection crRNA at 95° for five minutes. 2.52  $\mu\text{L}$  of 69  $\mu\text{M}$  AltR®  
279 *S. pyogenes* Cas9 Nuclease (IDT, catalog no. 1081058) was added to the tracrRNA/crRNA  
280 complex mixture and incubated at room temperature for five minutes. Finally, 0.5  $\mu\text{L}$  of 10  $\mu\text{M}$   
281 *dpy-10* repair construct and distilled water were added to a final volume of 10  $\mu\text{L}$ . The injection  
282 mixture was loaded into the injection capillary using a mouth pipet to avoid bubbles in the  
283 injection solution. Young adult animals were mounted onto agar injection pads, injected in either  
284 the anterior or posterior arm of the gonad, and allowed to recover on 6 cm plates in bulk. Twelve  
285 hours after injection, survivors were transferred to individual 6 cm plates. Broods with successful  
286 edits were easily observed because of the *dpy-10* co-injection marker, which created animals

287 with an obvious locomotive defect, roller (Rol), or morphological phenotype, dumpy (Dpy).  
288 Three to four days after injections, plates were checked for the presence of Rol or Dpy F1  
289 progeny. These Rol F1 progeny were transferred to individual 6 cm plates, allowed to lay  
290 offspring, and genotyped for the desired edit 24 hours later. Genotyping was performed with  
291 PCR amplicons designed around the desired site of the deletion. Plates with heterozygous or  
292 homozygous deletions were propagated and genotyped for at least two more generations to  
293 ensure homozygosity and to cross out the Rol mutation. Deletion amplicons were Sanger  
294 sequenced to identify the exact location of the deletion. Reagents used to generate deletion  
295 alleles are detailed in **Supplemental Information**.

296

297 **Generation of CRISPR-mediated *jmjd-5* allele replacements:** Allele replacement strains were  
298 created to test the effect of a particular amino acid substitution on bleomycin responses. A guide  
299 RNA was designed to cut two bp downstream of the natural variant, with an on-target score of 31  
300 and off-target score of 47 (Doench *et al.* 2016). Two repair constructs were designed, one for the  
301 N2 to CB4856 replacement and *vice versa*. Repair oligonucleotides were homologous to the  
302 background strain except for the nucleotide variant, a silent mutation in the PAM site (A339A) to  
303 eliminate repair construct cleavage, and a silent mutation that introduces a *Bsa*AI restriction  
304 enzyme cut site (T336T). Repair constructs contained a 35-bp homology arm on the PAM-  
305 proximal side of the edit and a 91-bp homology arm on the PAM-distal side of the edit. Injection  
306 mixes were made as above, with 0.6  $\mu$ L of 100  $\mu$ M *jmjd-5* repair construct added with the *dpy-*  
307 *10* repair construct in the last step of the protocol. Animals were injected as above and Rol F1  
308 progeny were genotyped using PCR and restriction enzyme digestion. As with the deletion  
309 alleles, edited strains were homozygosed and their genotypes were confirmed with Sanger

310 sequencing. Reagents used to generate these allele replacement strains are detailed in the  
311 **Supplemental Information.**

312

313 **Linkage mapping of expression QTL:** Microarray data for 13,107 probes were collected for  
314 synchronized young adult populations of 209 recombinant lines previously (Rockman *et al.*  
315 2010). We performed linkage mapping as described above on these expression data and  
316 identified significant peaks for 3,298 probes (**File S13**). For the *H19N07.3* probe  
317 (A\_12\_P104350), the full annotated-LOD data frame is provided (**File S14**).

318

319 **Hemizyosity high-throughput assay:** Hemizyosity assays were used to test the effect of zero  
320 (two deletion alleles), one (one deletion allele and one wild-type allele), or two (two wild-type  
321 alleles) functional copies of a gene product on bleomycin responses. If the phenotype is affected  
322 by gene function, one would expect to see bleomycin responses scale with the number of  
323 functional alleles of the gene present in each strain. For each heterozygous/hemizygous  
324 genotype, 30 hermaphrodites and 60 males were placed onto each of four 6 cm plates and  
325 allowed to mate for 48 hours. The same process was completed for homozygous strains to  
326 remove biases introduced by the presence of male progeny in the assay. Mated hermaphrodites  
327 were transferred to a clean 6 cm plate and allowed to lay embryos for eight hours. After the egg  
328 lay period, adults were manually removed from egg lay plates, and embryos were washed into 15  
329 mL conicals using M9 and a combination of pasteur pipette rinsing and scraping with plastic  
330 inoculation loops. Embryos were rinsed and centrifuged four times with M9 before being  
331 resuspended in K medium and 50  $\mu$ M kanamycin. Embryos hatched and arrested in the L1 larval  
332 stage in conicals overnight at 20° with shaking. The next morning, 50 L1 larvae were sorted into



333 each well of a 96-well plate containing K medium, 10 mg/mL bacterial lysate, 50  $\mu$ M  
334 kanamycin, and either 1% distilled water or 1% distilled water plus bleomycin using the  
335 BIOSORT (dose-response assay, **Figure S10, File S1**) or by titring (hemizyosity assays,  
336 **Figure 6, Figure S11, Figure S12, File S1**). Animals were incubated in these plates for 48 hours  
337 at 20° with shaking and were paralyzed with 50  $\mu$ M sodium azide in M9 before being scored for  
338 phenotypic parameters using the BIOSORT.

339

340 **Statistical analysis:** All statistical tests of phenotypic differences in the NIL, deletion strain, and  
341 allele-replacement strain assays were performed in R (version 3.3.1) using the *TukeyHSD*  
342 function (R Core Team) and an ANOVA model with phenotype as the dependent variable and  
343 strain as the independent variable (*phenotype ~ strain*). The p-values of individual pairwise strain  
344 comparisons were reported, and p-values less than 0.05 were deemed significant. For each figure  
345 (with the exception of hemizyosity tests), phenotypes of NILs, deletion strains, and allele-  
346 replacement strains were compared to phenotypes of their respective background strains (either  
347 N2 or CB4856), and statistical significance is denoted by an asterisk above the boxplot for each  
348 strain. P-values of all pairwise comparisons are reported in **File S7**. Correlation between RIAIL  
349 *H19N07.3* expression and median optical density in bleomycin was tested using a Spearman's  
350 correlation test. Statistical difference between N2 and CB4856 expression of *H19N07.3*  
351 measured by RNA-seq was tested using a likelihood-ratio and a Wald test with a threshold of  $p <$   
352 0.05.

353

354 **RNA-seq:** Three independent replicates of RNA were sampled as follows. Bleach-synchronized  
355 embryos (~2,000) of the N2 and CB4856 strains were grown on 10 cm plates of NGMA for 66-



356 69 hours. When F1 embryos appeared on the plate, synchronized young adults were collected by  
357 washing each plate twice with M9 buffer and incubating for 30 minutes in M9 to remove  
358 remaining bacteria. Then, samples were washed twice again with M9 buffer, and then washed  
359 with sterile water. Animals were pelleted and homogenized in Trizol (Ambion) by repeating  
360 freezing-thawing with liquid nitrogen five times. To extract RNA from each sample, chloroform,  
361 isopropanol, and ethanol were used for phase separation, precipitation and washing steps,  
362 respectively. RNA pellets were resuspended in TE buffer, and RNA quality was measured with a  
363 2100 Bioanalyzer (Agilent). Library preparation and RNA sequencing (HiSeq4000, Illumina)  
364 were performed by the Genomics Facility at the University of Chicago. RNA-seq data were  
365 quantified with kallisto and then within-sample and between-sample normalization was  
366 performed using sleuth, which is based on DESeq (Anders and Huber 2010; Bray *et al.* 2016;  
367 Pimentel *et al.* 2017). Significant differences between samples were determined by likelihood-  
368 ratio and Wald tests. RNA-seq data are reported in **File S16**.

369  
370 **Genome-wide association mapping:** Bleomycin responses were measured for 83 *C. elegans*  
371 isotypes using the high-throughput fitness assay (**File S18**). Genome-wide association mapping  
372 was performed as described previously (Zdraljevic *et al.* 2019) using genotype data from  
373 CeNDR Release 20180527 (Cook *et al.* 2017). In short, BCFtools was used to remove variants  
374 with missing genotype calls and variants with a minor allele frequency below 5% (Li 2011), and  
375 PLINK v1.9 was used to prune the genotypes at a linkage disequilibrium threshold of  $r^2 < 0.8$   
376 (Purcell *et al.* 2007; Chang *et al.* 2015), for a total of 59,241 pruned markers. A kinship matrix  
377 was generated using the *A.mat* function in the *rrBLUP* R package (Endelman 2011; Endelman  
378 and Jannink 2012). The *GWAS* function in the *rrBLUP* package was used to perform genome-

379 wide association mapping with EMMA algorithm to correct for kinship (Kang *et al.* 2008;  
380 Covarrubias-Pazaran 2016). The relatedness among these wild isolates was described previously  
381 (Andersen *et al.* 2012; Hahnel *et al.* 2018; Zdraljevic *et al.* 2019).

382

383 **Identification of rare variants:** VCF release 20180527 was downloaded from  
384 elegansvariation.org (Cook *et al.* 2017). The VCF was filtered to select all variants within the  
385 linkage mapping confidence interval (V:11042745-11189364) where CB4856 contains the  
386 alternate allele (**File S20**). Variants with a minor allele frequency less than 0.05 within the 83  
387 wild isolates that have a bleomycin median optical density measurement were deemed “rare”.

388

389 **Creation of neighbor-joining tree:** Protein sequences for homologs of the *C. elegans*  
390 H19N07.3 protein (**File S21**) were input to MUSCLE (Edgar 2004a; b) to generate a multiple-  
391 sequence alignment. CLUSTALW was then used to generate a neighbor-joining tree and output  
392 as a Newick formatted file (**File S22**).

393

394 **Data availability:** All data are available on Figshare. **File S1** contains all pruned data from the  
395 high-throughput bleomycin assays. **File S2** contains the broad-sense heritability estimates  
396 calculated for each drug concentration for all 26 HTA traits for the HTA dose response as well as  
397 for the 24 HTA traits in the modified HTA dose response. **File S3** contains all control-regressed  
398 data for the 26 HTA traits for all assays. **File S4** contains the annotated linkage mapping data for  
399 the 26 control-regressed HTA traits. **File S5** is a VCF that reports the genotype from whole-  
400 genome sequence for all NILs in the manuscript. **File S6** is a simplified version of **File S5** that  
401 contains information on recombination locations for all NILs and can be used for more user-

402 friendly visualization of NIL genotypes. **File S7** contains all statistical information for HTA  
403 phenotypic differences reported in the manuscript. **File S8** is a summary of the scantwo analysis  
404 for bleomycin responses in the RIAILs and reports the maximum interaction LOD score for each  
405 chromosome pair. **File S9** contains information on all genes in the QTL confidence interval plus  
406 20 kb on either side. **File S10** contains locations of the exons, introns, and transcription start and  
407 stop sites for all genes in the region. **File S11** reports predicted non-synonymous variants  
408 between the N2 and CB4856 strains in the region. **File S12** is derived from the Rockman *et al.*  
409 2010 RIAIL microarray expression data, and reports the expression measurements for each of the  
410 13,107 microarray probes across 209 RIAILs. **File S13** contains all significant QTL identified by  
411 linkage mapping of **File S12** data. **File S14** contains the annotated linkage mapping of the  
412 *H19N07.3* expression data. **File S15** reports the *H19N07.3* expression and residual median  
413 optical density for strains of the RIAIL panel that were assayed for both of those traits. **File S16**  
414 contains *H19N07.3* RNA-seq expression data for populations of young adults of N2 and  
415 CB4856. **File S17** is a summary of the scantwo analysis for *H19N07.3* expression in the RIAILs  
416 and reports the maximum interaction LOD score for each chromosome pair. **File S18** contains  
417 control-regressed phenotypic data for all wild isolates assayed in response to bleomycin. **File**  
418 **S19** contains genome-wide association mapping for the phenotypes in **File S18**. **File S20**  
419 contains genotype information for each strain measured in **File S18** across all variants within the  
420 linkage mapping confidence interval around the QTL for which CB4856 contains the alternate  
421 allele. **File S21** is a FASTA file containing the protein sequences for all *H19N07.3* homologs.  
422 **File S22** is a neighbor-joining tree derived from a multiple sequence alignment of all sequences  
423 from **File S21** in Newick tree format.  
424

425

## RESULTS

426

### 427 **Genetic differences underlie bleomycin-response variation**

428 Bleomycin causes double-stranded DNA breaks, which ultimately lead to cytotoxicity of rapidly  
429 dividing cell populations. Therefore, exposure to bleomycin can affect the development of *C.*  
430 *elegans* larvae as well as germ-cell production of adult animals. We used a high-throughput  
431 assay (HTA) to measure the effects of bleomycin on development and brood size (**Figure S1,**  
432 **Materials and Methods**). To determine the concentration of bleomycin that would maximize  
433 among-strain while minimizing within-strain phenotypic variation, we used the HTA to perform  
434 a dose-response assay. We assessed bleomycin responses for four divergent strains (N2,  
435 CB4856, JU258, and DL238) across each of 26 HTA traits (**File S1, Figure S2**). For each  
436 concentration of bleomycin, we calculated the broad-sense heritability of the traits (**Materials and**  
437 **Methods**) and found that heritability was maximized at 50  $\mu\text{M}$  bleomycin (mean  $H^2$  across all  
438 traits = 0.58, **File S2**). Given these results, we exposed animals to 50  $\mu\text{M}$  bleomycin for all future  
439 HTA experiments.

440

441 Two of the strains used in the dose response assay, N2 and CB4856, have been extensively  
442 characterized at the genome level (Wicks *et al.* 2001; Swan *et al.* 2002; Thompson *et al.* 2015)  
443 and displayed divergent bleomycin responses (**Figure S2**). Recombinant inbred advanced  
444 intercross lines (RIAILs) were previously constructed between these two strains (Rockman and  
445 Kruglyak 2009; Andersen *et al.* 2015), and these RIAILs have been leveraged to identify genetic  
446 variants that cause phenotypic differences between the N2 and CB4856 strains (Kammenga *et al.*  
447 2007; Seidel *et al.* 2008, 2011; Palopoli *et al.* 2008; Reddy *et al.* 2009; McGrath *et al.* 2009;

448 Bendesky *et al.* 2011, 2012; Andersen *et al.* 2014; Schmid *et al.* 2015; Zdraljevic *et al.* 2017;  
449 Lee *et al.* 2017). We used these RIALs to identify genetic variants that contribute to differential  
450 bleomycin responses between the N2 and CB4856 strains. Using our HTA, we measured each of  
451 the 26 fitness parameters for 249 RIALs (Materials and Methods, **File S3**). Correlations  
452 between each pairwise combination of the 26 HTA measurements revealed several clusters of  
453 highly correlated traits (**Figure S3**). Therefore, the summary statistics measured by the  
454 BIOSORT should not be considered independent traits for linkage mapping. We selected median  
455 optical density (median.EXT) for future analyses, which is related to both animal length and  
456 optical extinction, because this trait was highly correlated with many of the 26 HTA traits and  
457 was highly heritable ( $H^2 = 0.73$ , **File S2**).

458

#### 459 **The QTL on the center of chromosome V strongly impacts bleomycin response**

460 We performed linkage mapping on the residual median optical density measurements in  
461 bleomycin (**Figure S4**, **Figure S5**, **File S4**, Materials and Methods) and identified four  
462 significant quantitative trait loci (QTL, **Figure 1A**). The QTL on the center of chromosome V  
463 was highly significant (explained 43.58% of the total variation and 55.60% of the genetic  
464 variation) with a LOD score of 32.57, and it was detected for 25 of the 26 HTA traits (**Figure S5**,  
465 **File S4**). The QTL 95% confidence interval was approximately 147 kb. Strains with the N2  
466 allele at the peak marker had a lower median optical density in bleomycin and were interpreted  
467 to be more sensitive than those RIALs with the CB4856 allele (**Figure 1B**).

468

469 We isolated this QTL in a controlled genetic background by generating near-isogenic lines  
470 (NILs, **File S5**, **File S6**) that each contain a genetic background derived from either the N2 or

471 CB4856 strain and a region of chromosome V from the opposite parental genotype. We used the  
472 HTA to test these strains in response to bleomycin (**File S3**). The NIL with the N2 genotype  
473 across this QTL introgressed into the CB4856 background (ECA230) was statistically more  
474 sensitive to bleomycin than CB4856 (**Figure S6, File S7**,  $p = 1.3e-14$ , Tukey HSD). This  
475 phenotype indicated that the N2 genotype within the introgressed region (which includes the  
476 QTL confidence interval) confers sensitivity to bleomycin. However, the reciprocal NIL with the  
477 CB4856 locus introgressed into the N2 background (ECA232) had a bleomycin-response  
478 phenotype that was not significantly different from the N2 strain (**Figure S6, File S7**,  $p = 0.053$ ,  
479 Tukey HSD), suggesting that interacting loci could underlie bleomycin responses in a  
480 background-dependent manner. We performed a two-factor genome scan to map potential  
481 epistatic loci but did not identify a significant interaction between the QTL on chromosome V  
482 and other loci (**Figure S7, File S8**). However, the failure to detect significant interacting QTL  
483 could be because we have too few recombinant strains or because too few replicates of each  
484 RIAIL were phenotyped. Alternatively, more than two loci might underlie the transgressive  
485 phenotype of ECA230 and a two-factor genome scan might not be able to capture this  
486 complexity.

487  
488 Nonetheless, because ECA230 recapitulated the expected QTL phenotype, we generated two  
489 NILs (ECA411 and ECA528) that narrowed this introgressed region to more precisely locate the  
490 causal variant (**File S5, File S6**). In addition, the N2 region on the left of chromosome V was  
491 removed from both NIL strains to ensure that this region of introgression did not underlie the  
492 phenotypic difference between ECA230 and CB4856. The genotypes of ECA411 and ECA528  
493 differ in a small region of chromosome V that includes the QTL confidence interval (**Figure 2**,

494 **File S5, File S6**). Both of these strains were more sensitive to bleomycin than the background  
495 parental strain, CB4856. This result could suggest that the introgressed region shared between  
496 these strains, which does not include the QTL, conferred some bleomycin-response variation  
497 between the N2 and CB4856 strains (**Figure 2**). Alternatively, the hypersensitivity of these NILs  
498 could suggest the presence of Dobzhansky-Muller incompatibilities between the N2 and CB4856  
499 genotypes (Snoek *et al.* 2014) that might affect stress responses of the NILs. However, ECA528  
500 was much more sensitive to bleomycin than ECA411 (**Figure 2, File S7**). Because ECA528 has  
501 the N2 genotype across the QTL region and ECA411 has the CB4856 genotype, these results  
502 suggest that the QTL genotype strongly affects bleomycin sensitivity (**Figure 2**, ECA528 vs.  
503 each other strain  $p < 1e-14$ , Tukey HSD). The empirically defined region lies between  
504 10,339,727 and 11,345,443 bp on chromosome V and fully encompasses the linkage mapping  
505 confidence interval (from 11,042,745 to 11,189,364 bp on chromosome V).

506

### 507 **Genes with non-synonymous variants in the QTL region do not impact bleomycin** 508 **responses**

509 Because the recombination rate in the centers of *C. elegans* chromosomes is lower than  
510 chromosome arms (Rockman and Kruglyak 2009), it was difficult to generate additional NILs to  
511 narrow the QTL region further. Therefore, we took a targeted approach and created CRISPR-  
512 Cas9 directed modifications of candidate genes in the region. The 147 kb confidence interval on  
513 chromosome V contains 93 genes, including pseudogenes, piRNA, miRNA, ncRNA, and  
514 protein-coding genes (**File S9**). Given the narrow confidence interval, we expanded our search to  
515 include an additional 20 kb on each side of the 147 kb interval (Materials and Methods). Of the  
516 118 genes included in the wider region, five genes, *C45B11.8*, *C45B11.6*, *jmjd-5*, *srg-42*, and

517 *cnc-10*, contain predicted non-synonymous variants between the N2 and CB4856 strains (**Figure**  
518 **3A, File S10, File S11**). These variants could cause differential bleomycin sensitivity between  
519 the N2 and CB4856 strains.

520

521 To test these genes in bleomycin-response variation, we systematically deleted each of the  
522 candidate genes in both the N2 and CB4856 backgrounds. We used CRISPR-Cas9 mediated  
523 genome editing to generate two independent deletion alleles of each gene in each genetic  
524 background to reduce the possibility that off-target mutations could cause phenotypic differences  
525 (Materials and Methods, Supplemental Information). We tested the bleomycin response of each  
526 deletion allele in comparison to the N2 and CB4856 parental strains (**Figure 3B, File S3**). The  
527 deletion alleles of *C45B11.8*, *C45B11.6*, *srg-42*, and *cnc-10* each had a bleomycin response  
528 similar to the respective parent genetic background, which suggested that the functions of each  
529 of these genes did not affect bleomycin responses (**Figure 3B, File S7**,  $p > 0.05$ , Tukey HSD).  
530 By contrast, the *jmjd-5* deletion alleles in the N2 and the CB4856 backgrounds were each more  
531 resistant to bleomycin than their respective parental strains (**Figure 3B, File S7**, ECA1047 vs.  
532 CB4856  $p = 3.8e-10$ , ECA1048 vs. CB4856  $p = 0.026$ , ECA1051 vs. N2  $p = 7.4e-4$ , ECA1052  
533 vs. N2  $p = 2.9e-6$ , Tukey HSD). However, we also noted that these strains were more sensitive in  
534 the control condition than other deletion strains (**Figure S8, File S1, File S7**). Therefore, the  
535 relative increased bleomycin resistance observed in the *jmjd-5* deletion strains could be caused  
536 by their increased sensitivity in the control condition.

537

538 We tested if the non-synonymous variant in *jmjd-5* between the N2 and CB4856 strains caused  
539 bleomycin-response differences. At residue 338 of JMJD-5, the N2 strain has a proline, whereas



540 the CB4856 strain has a serine (S338P, **Figure S9A**). We used CRISPR-Cas9 to generate  
541 reciprocal allele replacements of the *jmjd-5* single-nucleotide polymorphism that encodes the  
542 putative amino-acid change in the N2 background *jmjd-5(N2 to CB4856)* and in the CB4856  
543 background *jmjd-5(CB4856 to N2)* (Materials and Methods, Supplemental Information). We  
544 created two independent allele replacements in each genetic background and measured each  
545 strain for bleomycin-response differences as compared to the parental strains (**Figure S9B, File**  
546 **S3**). Although the allele-replacement strains with the CB4856 allele in the N2 genetic  
547 background *jmjd-5(N2 to CB4856)* were significantly different from the N2 parental strain, these  
548 strains were more sensitive to bleomycin than N2 (**Figure S9B, File S7**, ECA576 vs. N2  $p =$   
549 0.006, ECA577 vs. N2  $p = 1.6e-6$ , Tukey HSD). This increased sensitivity was unexpected,  
550 because the CB4856 allele at the *jmjd-5* locus should confer resistance. However, the NIL with  
551 the CB4856 genotype across the QTL was not different from the N2 parental strain (ECA232 in  
552 **Figure S6, File S7**), suggesting that the QTL might only confer increased sensitivity when the  
553 N2 allele is in the CB4856 background. Therefore, it remained unclear whether an allele  
554 replacement of *jmjd-5* in the N2 parental background could confer resistance. Neither of the two  
555 strains with the N2 allele in the CB4856 background, *jmjd-5(CB4856 to N2)*, conferred a  
556 significantly more sensitive phenotype than the CB4856 parental strain (**Figure S9B, File S7**).  
557 Given that the QTL explained 43.58% of phenotypic variation among the RIALs, the causal  
558 variant should have a clear impact on bleomycin response. Additionally, the NILs with the N2  
559 allele at the QTL introgressed into the CB4856 background displayed a significant increase in  
560 bleomycin sensitivity compared to the parental CB4856 strain (**Figure S6, File S7**). Taken  
561 together, the phenotypes of the reciprocal allele-replacement strains showed that the amino-acid  
562 change in JMJD-5 likely does not underlie bleomycin-response variation between the N2 and

563 CB4856 strains, although deletion of this gene did cause resistance to bleomycin regardless of  
564 the genetic background. We performed a reciprocal hemizyosity assay to test if natural variation  
565 in *jmjd-5* function affected bleomycin responses (**Figure S10, Figure S11, Figure S12**). The  
566 results of this assay supported the previously identified increase in bleomycin resistance of  
567 homozygous *jmjd-5* deletions in both parental backgrounds (**Figure S11, File S7,  $p < 0.05$ ,**  
568 Tukey HSD), which again might be caused by an increased sensitivity in the control condition  
569 (**Figure S12**). However, the increases in bleomycin resistance between each *jmjd-5* deletion  
570 strain and the strain with the same genetic background were similar, and the reciprocal  
571 hemizygous strains show equivalent bleomycin responses (**Figure S11**). Taken together, these  
572 results suggest that natural variation in *jmjd-5* function does not underlie this QTL.

573

#### 574 **The nematode-specific gene *H19N07.3* impacts bleomycin variation**

575 Because none of the genes with a non-synonymous variant between the N2 and CB4856 strains  
576 explained the QTL, we explored other ways in which natural variation could impact bleomycin  
577 responses. We used the 13,001 SNPs to perform linkage mapping on the gene expression data of  
578 the RIAILs and identified 4,326 expression QTL (eQTL) across the genome (Rockman *et al.*  
579 2010, **File S12, File S13**, Materials and Methods). Of the 118 genes in the 187 kb surrounding  
580 the bleomycin-response QTL, expression for 50 genes were measured in the previous microarray  
581 study. We identified a significant eQTL for eight of these 50 genes, four of which mapped to  
582 chromosome V (**File S13**). eQTL for two of those four genes, *H19N07.3* and *cnc-10*, mapped to  
583 the center of chromosome V and overlapped with the bleomycin-response QTL. Because *cnc-10*  
584 did not underlie bleomycin response variation (**Figure 3B**), we hypothesized that *H19N07.3*  
585 might underlie the bleomycin-response QTL. The *H19N07.3* eQTL explains 45.70% of the

586 variation in *H19N07.3* expression among the RIAILs (**Figure 4A and B, File S14**). The length  
587 of animals and expression of *scb-1* was correlated in the RIAIL strains (**Figure 4C, File S15**,  
588  $r^2 = 0.61$ ,  $p < 9.5e-13$  Spearman's correlation). Although this gene does not have a non-  
589 synonymous variant between the N2 and CB4856 strains, natural variation in gene expression  
590 could impact bleomycin responses.

591  
592 We created two independent CRISPR-Cas9 mediated deletion alleles of *H19N07.3* in the N2 and  
593 the CB4856 backgrounds and measured the bleomycin responses of these strains compared to the  
594 parental strains (**Figure 5, File S3, File S7, Supplemental Information, Materials and Methods**).  
595 Each *H19N07.3* deletion strain was more sensitive to bleomycin than the respective parental  
596 strain (**Figure 5, File S3, File S7**, ECA1133 vs. CB4856  $p < 1.4e-14$ , ECA1134 vs. CB4856,  $p <$   
597  $1.4e-14$ , ECA1132 vs. N2,  $p = 6.9e-5$ , ECA1135 vs. N2,  $p = 0.006$ , Tukey HSD). These results  
598 suggest that *H19N07.3* function is required for resistance to bleomycin. Therefore, we renamed  
599 this gene *scb-1* for sensitivity to the chemotherapeutic bleomycin. Unlike with the *jmjd-5*  
600 deletion strains, the *scb-1* deletion strains had no significant differences in the control condition  
601 (**File S7**). Therefore, the bleomycin sensitivity of the *scb-1* deletion strains were not caused by  
602 control-condition phenotypes.

603  
604 Because an *scb-1* non-synonymous variant has not been identified between the N2 and CB4856  
605 strains, changes to protein function likely do not cause bleomycin response differences. RIAILs  
606 with the CB4856 allele at the QTL peak marker have increased expression of *scb-1* and  
607 increased bleomycin resistance compared to RIAILs with the N2 allele (**Figure 1, Figure 4**).  
608 Therefore, *scb-1* expression differences might cause the bleomycin-response variation between

609 the parental strains. We performed RNA-seq of the N2 and CB4856 strains to assess *scb-1*  
610 expression differences between the parental strains and did not identify a significant increase in  
611 expression in the CB4856 strain (**Figure S13, File S16**,  $p = 0.20$ , Wald test;  $p = 0.17$ , likelihood  
612 ratio test). This result could be caused by the low sample size ( $n = 3$ ) in the RNA-seq  
613 experiment, or the RIAIL strains could have a novel variant that arose during strain construction  
614 that causes *scb-1* expression variation. Alternatively, the expression difference observed in the  
615 RIAIL strains could be attributed to epistatic loci. We performed a two-factor genome scan to  
616 identify epistatic loci that underlie *scb-1* expression variation in the RIAILs and identified two  
617 significant interactions: one between loci on chromosomes IV and X and another between loci on  
618 chromosomes II and V (**Figure S14, File S17**). This result might suggest that epistatic loci  
619 underlie *scb-1* expression variation in the RIAILs and could explain why *scb-1* expression is not  
620 variable in the parental strains.

621  
622 To test the role of natural variation in *scb-1* function, we performed a reciprocal hemizyosity  
623 test in control and bleomycin conditions (**Figure 6, File S3**). These results matched the increase  
624 in sensitivity of homozygous deletions in both parental backgrounds observed previously. The  
625 hemizygous strain with the CB4856 allele of *scb-1* had a bleomycin phenotype similar to the  
626 heterozygous strain, whereas the hemizygous strain with the N2 allele of *scb-1* was more  
627 sensitive to bleomycin than the heterozygous strain. Taken together, these results suggest that  
628 natural variation in *scb-1* function underlies the bleomycin-response difference between the N2  
629 and CB4856 strains.

630

631 **Differences in *scb-1* function might be regulated by a rare variant**

632 The *scb-1* natural variant that underlies the bleomycin-response differences remains unknown.  
633 Because this gene does not have a predicted non-synonymous variant between the N2 and  
634 CB4856 strains, *scb-1* gene expression might underlie bleomycin response differences. Potential  
635 candidate variants that could cause this expression difference include one variant two kilobases  
636 upstream of the gene and one variant in the third intron of *scb-1*. However, gene expression can  
637 be regulated by distant loci, so the identification of the specific variant is difficult. To understand  
638 whether natural variation of *scb-1* underlies bleomycin-response differences in other strains, we  
639 compared the bleomycin-response linkage mapping to a genome-wide association mapping  
640 (GWA). We used the HTA to measure median optical density in bleomycin for 83 divergent wild  
641 isolates and performed GWA mapping (**Figure 7, File S18, File S19**). Six QTL were identified  
642 from the GWA, but none of these QTL regions overlapped the QTL from linkage mapping  
643 (**Figure 7, File S19**). Therefore, the CB4856 strain might have a rare variant that underlies its  
644 increase in bleomycin resistance compared to the N2 strain.

645  
646 We identified all single nucleotide variants (SNVs), small insertion/deletions (indels), and  
647 structural variants (SVs) present in these 83 strains for which the CB4856 strain contains the  
648 alternate allele compared to the N2 reference strain. We found 105 variants within the QTL  
649 confidence interval (79 SNVs, 26 indels, 0 SVs) for which the CB4856 strain contains the  
650 alternate allele (**Figure S15, File S20**). We then identified SNVs and indels with a minor-allele  
651 frequency less than 5% within the 83 strains, because these low-frequency variants are likely to  
652 have insufficient power to map by GWA. Seventy-two of the 105 variants in the region were  
653 identified as rare variants that might underlie the bleomycin-response difference between the N2  
654 and CB4856 strains (**Figure S15, File S20**). Twenty-eight of these rare variants were not unique

655 to CB4856, and other strains in the wild isolate panel shared these variants. However, none of  
656 these variants showed phenotypic trends consistent with an alternate allele conferring resistance  
657 to bleomycin (**Figure S16**). Forty-four of the 72 rare variants were unique to CB4856 within this  
658 set of 83 strains. One or more of these 44 variants could underlie the bleomycin-response QTL,  
659 but further work must be performed to identify which, if any, of these variants underlies the *scb-*  
660 *I* bleomycin-response difference between N2 and CB4856.

661  
662 We searched for homologs of *scb-1* in other species using a BLASTp search  
663 ([www.wormbase.org](http://www.wormbase.org), Release WS268) and identified homologs in nine other *Caenorhabditis*  
664 species but none outside of the Nematoda phylum (**Figure S17, File S21, File S22**) (Edgar  
665 2004a; b). None of the homologs of SCB-1 have previously identified functions. We used Phyre2  
666 to predict protein domains within the SCB-1 protein and were unable to detect any functional  
667 domains by sequence homology. Twenty-three percent of the SCB-1 protein sequence matched a  
668 hydrolase of a Middle East respiratory syndrome-related coronavirus (Zhang *et al.* 2018).  
669 However, the low confidence of the model (21.5%) should be considered before making  
670 conclusions about the function of *scb-1* based on these results.

671  
672 **DISCUSSION**

673  
674 Here, we performed linkage mapping of bleomycin-response variation and identified a highly  
675 significant QTL on chromosome V. We tested all six candidate genes in the QTL region to  
676 identify a causal gene that underlies bleomycin-response variation between two divergent strains.  
677 Deletions of four of these genes, *C45B11.8*, *C45B11.6*, *srg-42*, and *cnc-10* did not impact

678 bleomycin responses. Deletions in one gene, *jmjd-5*, showed increased bleomycin resistance in  
679 both parental backgrounds. However, we concluded that the QTL cannot be explained by  
680 differences in *jmjd-5* after further analysis of allele-replacement strains and hemizyosity tests.  
681 Deletions in a gene with an expression difference, *scb-1* (previously named *H19N07.3*), caused  
682 an increase in bleomycin sensitivity in both the N2 and the CB4856 strains. Results from a  
683 reciprocal hemizyosity assay indicated that natural variation in *scb-1* function caused  
684 differences in bleomycin responses between the N2 and CB4856 strains. Because loss-of-  
685 function alleles in *scb-1* caused increased bleomycin sensitivity (**Figure 5**) and the RIAILs with  
686 lower *scb-1* expression levels show increased bleomycin sensitivity (**Figure 4**), natural  
687 differences in *scb-1* expression might cause the bleomycin-response variation between the N2  
688 and CB4856 strains.

689  
690 The function of *scb-1*, and particularly how it regulates bleomycin response, remains unknown.  
691 A previous study found that RNAi of *scb-1* impaired the DAF-16/FOXO-induced lifespan  
692 extension of *daf-2(e1370ts)* mutants, which suggests that *scb-1* might play a role in stress  
693 response (Riedel *et al.* 2013). Because bleomycin causes double-stranded DNA breaks and  
694 introduces oxidative stress to cells (Stubbe and Kozarich 1987), reduction of *scb-1* function  
695 might inhibit the ability of an animal to respond to bleomycin. This model is in agreement with  
696 our observation that *scb-1* deletions and RIAILs with lower *scb-1* expression are sensitive to  
697 bleomycin (**Figure 4, Figure 5**). We used the amino acid sequence of SCB-1 to query the Phyre2  
698 database and found weak homology to a viral hydrolase (Kelley *et al.* 2015; Zhang *et al.* 2018).  
699 This result could suggest that SCB-1 might function as a hydrolase, which could be the  
700 mechanism by which *scb-1* regulates cellular stress. This finding would be similar to clinical

701 studies that have suggested a role of bleomycin hydrolase (BLMH) in bleomycin-response  
702 variation (Lazo and Humphreys 1983; Nuver *et al.* 2005; de Haas *et al.* 2008; Gu *et al.* 2011;  
703 Altés *et al.* 2013). Because *scb-1* is expressed in the nucleus of all somatic cells, this gene might  
704 impact the ability of bleomycin to cause DNA damage within the cell nucleus (Turek *et al.*  
705 2016). Alternatively, *scb-1* could impact bleomycin import, export, or another mechanism. If the  
706 mechanism of *scb-1* is conserved in humans, this discovery could offer insights into the clinical  
707 applications of bleomycin. Our results also suggested the presence of genes that interact with  
708 *scb-1* to cause bleomycin-response differences. These interacting genes could be conserved in  
709 humans and therefore inform the use of bleomycin in the clinic.

710

711 Despite its lack of conservation in humans, the SCB-1 protein is homologous to other proteins in  
712 other nematode species. Bleomycin is produced by the soil bacterium, *Streptomyces verticillus*  
713 (Calcutt and Schmidt 1994; Du *et al.* 2000; Shen *et al.* 2002), which might be found in  
714 association with nematodes such as *C. elegans* in the wild (Samuel *et al.* 2016). A shared niche  
715 between *C. elegans* and *S. verticillus* could cause bleomycin resistance to be selected.  
716 Additionally, the CB4856 wild isolate is more resistant to bleomycin than the laboratory-adapted  
717 strain, N2. In fact, the N2 strain is the most sensitive to bleomycin across all strains tested in our  
718 HTA (**Figure S16**), which could indicate that bleomycin resistance is beneficial for wild isolates.  
719 Given its potential role in the highly conserved insulin-like pathway, *scb-1* could be beneficial in  
720 responses to multiple toxins. Interestingly, the *scb-1* gene lies within a toxin-response QTL  
721 hotspot on chromosome V (Evans *et al.* 2018). Understanding the mechanism of the role of *scb-1*  
722 in toxin responses might offer insights into evolutionary processes that shaped the genomic  
723 diversity of *C. elegans* and other nematode species.



724

725 Previous studies have leveraged both linkage mapping and GWA in *C. elegans* to identify  
726 genetic variants that underlie drug-response differences (Zdraljevic *et al.* 2017, 2019). In each of  
727 these studies, drug-response QTL overlap between linkage mapping and GWA, and variants in  
728 common between both mapping strain sets have been shown to underlie drug-response QTL. In  
729 the case of the bleomycin response, the linkage-mapping QTL did not overlap with the QTL  
730 identified through GWA. Therefore, the variant that underlies the QTL likely is not present at an  
731 allele frequency above 5% in the panel of wild isolates used for the bleomycin GWA. The  
732 difference between linkage mapping and GWA results indicates that both rare and common  
733 natural variants underlie bleomycin-response variation.

734

735 This study emphasizes the power of the *C. elegans* model system to dissect complex traits.  
736 Although linkage mapping detected a highly significant QTL, the manner in which genetic  
737 components affect bleomycin responses is not simple. Certain near-isogenic lines showed  
738 transgressive phenotypes (**Figure 2, Figure S6**), which indicates that multiple loci interact to  
739 create extreme bleomycin sensitivity in particular strains with mixed genetic backgrounds. Our  
740 attempts to identify epistatic loci that underlie bleomycin responses in the RIAILs were  
741 unsuccessful, potentially because of the complexity of these epistatic interactions. Despite this  
742 complexity, *scb-1* deletions showed increased bleomycin sensitivity in both parental  
743 backgrounds, and expression variation among the RIAIL panel mapped to the same locus as the  
744 bleomycin response QTL. Interestingly, the parental strains do not seem to vary in *scb-1*  
745 expression, as measured by RNA-seq (**Figure S13**). We found evidence of epistatic loci that  
746 underlie *scb-1* expression variation in the RIAILs, which might explain why the parental strains

747 do not differ in *scb-1* expression (**Figure S14**). Additional complexities of this trait include the  
748 lack of overlap between GWA and linkage mapping QTL and the potential effect of *jmjd-5* loss-  
749 of-function on bleomycin responses. Despite the complicated manner in which genetic variants  
750 seem to affect bleomycin responses, we leveraged the powerful model of *C. elegans* to identify a  
751 single gene that underlies this complex trait.

752

753

### ACKNOWLEDGEMENTS

754

755 This work was supported by an American Cancer Society Research Scholar Grant to ECA  
756 (127313-RSG-15-135-01-DD) to ECA. Additionally, SCB received support from the  
757 Biotechnology Training Program training grant (T32GM008449) and the Dr. John N. Nicholson  
758 Fellowship. SZ received support from the Cell and Molecular Basis of Disease training grant  
759 (T32GM008061) and The Bernard and Martha Rappaport Fellowship. KWB received support  
760 from a Northwestern Undergraduate Research Grant. DEC was supported by the National  
761 Science Foundation Graduate Research Fellowship (DGE-1324585). YW was supported as a  
762 joint PhD student by China Scholarship Council (No. 201706910052). We would like to thank  
763 members of the Andersen Lab for helpful comments on the manuscript.

764

765  
766  
767  
768  
769  
770  
771  
772  
773  
774  
775  
776  
777  
778  
779  
780  
781  
782  
783  
784

## REFERENCES

- A. K. Corsi, B. Wightman, M. A. Chalfie, 2015 A transparent window into biology: A primer on *Caenorhabditis elegans*, in *WormBook*, edited by The *C. elegans* Research Community.
- Altés A., L. Paré, A. Esquirol, B. Xicoy, E. Rámila, *et al.*, 2013 Pharmacogenetic analysis in the treatment of Hodgkin lymphoma. *Leuk. Lymphoma* 54: 1706–1712.
- Anders S., and W. Huber, 2010 Differential expression analysis for sequence count data. *Genome Biol.* 11: R106.
- Andersen E. C., J. P. Gerke, J. A. Shapiro, J. R. Crissman, R. Ghosh, *et al.*, 2012 Chromosome-scale selective sweeps shape *Caenorhabditis elegans* genomic diversity. *Nat. Genet.* 44: 285–290.
- Andersen E. C., J. S. Bloom, J. P. Gerke, and L. Kruglyak, 2014 A variant in the neuropeptide receptor *npr-1* is a major determinant of *Caenorhabditis elegans* growth and physiology. *PLoS Genet.* 10: e1004156.
- Andersen E. C., T. C. Shimko, J. R. Crissman, R. Ghosh, J. S. Bloom, *et al.*, 2015 A Powerful New Quantitative Genetics Platform, Combining *Caenorhabditis elegans* High-Throughput Fitness Assays with a Large Collection of Recombinant Strains. *G3* 5: 911–920.
- Bendesky A., M. Tsunozaki, M. V. Rockman, L. Kruglyak, and C. I. Bargmann, 2011 Catecholamine receptor polymorphisms affect decision-making in *C. elegans*. *Nature* 472: 313–318.

- 785 Bendesky A., J. Pitts, M. V. Rockman, W. C. Chen, M.-W. Tan, *et al.*, 2012 Long-range  
786 regulatory polymorphisms affecting a GABA receptor constitute a quantitative trait locus  
787 (QTL) for social behavior in *Caenorhabditis elegans*. PLoS Genet. 8: e1003157.
- 788 Bloom J. S., I. M. Ehrenreich, W. T. Loo, T.-L. V. Lite, and L. Kruglyak, 2013 Finding the  
789 sources of missing heritability in a yeast cross. Nature 494: 234–237.
- 790 Blum R. H., S. K. Carter, and K. Agre, 1973 A clinical review of bleomycin--a new  
791 antineoplastic agent. Cancer 31: 903–914.
- 792 Boyd W. A., M. V. Smith, and J. H. Freedman, 2012 *Caenorhabditis elegans* as a model in  
793 developmental toxicology. Methods Mol. Biol. 889: 15–24.
- 794 Bray N. L., H. Pimentel, P. Melsted, and L. Pachter, 2016 Near-optimal probabilistic RNA-seq  
795 quantification. Nat. Biotechnol. 34: 525–527.
- 796 Brenner S., 1974 The genetics of *Caenorhabditis elegans*. Genetics 77: 71–94.
- 797 Calcutt M. J., and F. J. Schmidt, 1994 Gene organization in the bleomycin-resistance region of  
798 the producer organism *Streptomyces verticillus*. Gene 151: 17–21.
- 799 C. elegans Sequencing Consortium, 1998 Genome sequence of the nematode *C. elegans*: a  
800 platform for investigating biology. Science 282: 2012–2018.
- 801 Chang C. C., C. C. Chow, L. C. Tellier, S. Vattikuti, S. M. Purcell, *et al.*, 2015 Second-  
802 generation PLINK: rising to the challenge of larger and richer datasets. Gigascience 4: 7.
- 803 Chen J., and J. Stubbe, 2005 Bleomycins: towards better therapeutics. Nat. Rev. Cancer 5: 102–  
804 112.

- 805 Cloos J., E. J. Nieuwenhuis, D. I. Boomsma, D. J. Kuik, M. L. van der Sterre, *et al.*, 1999  
806 Inherited susceptibility to bleomycin-induced chromatid breaks in cultured peripheral blood  
807 lymphocytes. *J. Natl. Cancer Inst.* 91: 1125–1130.
- 808 Cook D. E., S. Zdraljevic, R. E. Tanny, B. Seo, D. D. Riccardi, *et al.*, 2016 The Genetic Basis of  
809 Natural Variation in *Caenorhabditis elegans* Telomere Length. *Genetics* 204: 371–383.
- 810 Cook D. E., S. Zdraljevic, J. P. Roberts, and E. C. Andersen, 2017 CeNDR, the *Caenorhabditis*  
811 *elegans* natural diversity resource. *Nucleic Acids Res.* 45: D650–D657.
- 812 Cook D. E., and E. C. Andersen, 2017 VCF-kit: assorted utilities for the variant call format.  
813 *Bioinformatics* 33: 1581–1582.
- 814 Covarrubias-Pazarán G., 2016 Genome-Assisted Prediction of Quantitative Traits Using the R  
815 Package sommer. *PLoS One* 11: e0156744.
- 816 Dagogo-Jack I., and A. T. Shaw, 2018 Tumour heterogeneity and resistance to cancer therapies.  
817 *Nat. Rev. Clin. Oncol.* 15: 81–94.
- 818 Doench J. G., N. Fusi, M. Sullender, M. Hegde, E. W. Vaimberg, *et al.*, 2016 Optimized sgRNA  
819 design to maximize activity and minimize off-target effects of CRISPR-Cas9. *Nat.*  
820 *Biotechnol.* 34: 184–191.
- 821 Du L., C. Sánchez, M. Chen, D. J. Edwards, and B. Shen, 2000 The biosynthetic gene cluster for  
822 the antitumor drug bleomycin from *Streptomyces verticillus* ATCC15003 supporting  
823 functional interactions between nonribosomal peptide synthetases and a polyketide  
824 synthase. *Chem. Biol.* 7: 623–642.

- 825 Edgar R. C., 2004a MUSCLE: multiple sequence alignment with high accuracy and high  
826 throughput. *Nucleic Acids Res.* 32: 1792–1797.
- 827 Edgar R. C., 2004b MUSCLE: a multiple sequence alignment method with reduced time and  
828 space complexity. *BMC Bioinformatics* 5: 113.
- 829 Eilbeck K., S. E. Lewis, C. J. Mungall, M. Yandell, L. Stein, *et al.*, 2005 The Sequence  
830 Ontology: a tool for the unification of genome annotations. *Genome Biol.* 6: R44.
- 831 Endelman J. B., 2011 Ridge Regression and Other Kernels for Genomic Selection with R  
832 Package rrBLUP. *Plant Genome* 4: 250–255.
- 833 Endelman J. B., and J.-L. Jannink, 2012 Shrinkage estimation of the realized relationship matrix.  
834 *G3* 2: 1405–1413.
- 835 Evans K. S., S. C. Brady, J. S. Bloom, R. E. Tanny, D. E. Cook, *et al.*, 2018 Shared Genomic  
836 Regions Underlie Natural Variation in Diverse Toxin Responses. *Genetics* 210: 1509–1525.
- 837 García-González A. P., A. D. Ritter, S. Shrestha, E. C. Andersen, L. S. Yilmaz, *et al.*, 2017  
838 Bacterial Metabolism Affects the *C. elegans* Response to Cancer Chemotherapeutics. *Cell*  
839 169: 431–441.e8.
- 840 Ghosh R., E. C. Andersen, J. A. Shapiro, J. P. Gerke, and L. Kruglyak, 2012 Natural variation in  
841 a chloride channel subunit confers avermectin resistance in *C. elegans*. *Science* 335: 574–  
842 578.
- 843 Gu J., Y. Ye, M. R. Spitz, J. Lin, L. A. Kiemeny, *et al.*, 2011 A genetic variant near the  
844 PMAIP1/Noxa gene is associated with increased bleomycin sensitivity. *Hum. Mol. Genet.*

- 845 20: 820–826.
- 846 Haas E. C. de, N. Zwart, C. Meijer, J. Nuver, H. M. Boezen, *et al.*, 2008 Variation in bleomycin  
847 hydrolase gene is associated with reduced survival after chemotherapy for testicular germ  
848 cell cancer. *J. Clin. Oncol.* 26: 1817–1823.
- 849 Hahnel S. R., S. Zdraljevic, B. C. Rodriguez, Y. Zhao, P. T. McGrath, *et al.*, 2018 Extreme  
850 allelic heterogeneity at a *Caenorhabditis elegans* beta-tubulin locus explains natural  
851 resistance to benzimidazoles. *PLoS Pathog.* 14: e1007226.
- 852 Hillier L. W., A. Coulson, J. I. Murray, Z. Bao, J. E. Sulston, *et al.*, 2005 Genomics in *C.*  
853 *elegans*: so many genes, such a little worm. *Genome Res.* 15: 1651–1660.
- 854 Hunter D. J., 2005 Gene-environment interactions in human diseases. *Nat. Rev. Genet.* 6: 287–  
855 298.
- 856 Kammenga J. E., A. Doroszuk, J. A. G. Riksen, E. Hazendonk, L. Spiridon, *et al.*, 2007 A  
857 *Caenorhabditis elegans* wild type defies the temperature-size rule owing to a single  
858 nucleotide polymorphism in *tra-3*. *PLoS Genet.* 3: e34.
- 859 Kang H. M., N. A. Zaitlen, C. M. Wade, A. Kirby, D. Heckerman, *et al.*, 2008 Efficient control  
860 of population structure in model organism association mapping. *Genetics* 178: 1709–1723.
- 861 Kelley L. A., S. Mezulis, C. M. Yates, M. N. Wass, and M. J. E. Sternberg, 2015 The Phyre2  
862 web portal for protein modeling, prediction and analysis. *Nat. Protoc.* 10: 845–858.
- 863 Lazo J. S., and C. J. Humphreys, 1983 Lack of metabolism as the biochemical basis of  
864 bleomycin-induced pulmonary toxicity. *Proc. Natl. Acad. Sci. U. S. A.* 80: 3064–3068.

- 865 Lee D., H. Yang, J. Kim, S. Brady, S. Zdraljevic, *et al.*, 2017 The genetic basis of natural  
866 variation in a phoretic behavior. *Nat. Commun.* 8: 273.
- 867 Li H., 2011 A statistical framework for SNP calling, mutation discovery, association mapping  
868 and population genetical parameter estimation from sequencing data. *Bioinformatics* 27:  
869 2987–2993.
- 870 Liu J., J. Huang, Y. Zhang, Q. Lan, N. Rothman, *et al.*, 2013 Identification of gene-environment  
871 interactions in cancer studies using penalization. *Genomics* 102: 189–194.
- 872 Low S.-K., S. Chung, A. Takahashi, H. Zembutsu, T. Mushiroda, *et al.*, 2013 Genome-wide  
873 association study of chemotherapeutic agent-induced severe neutropenia/leucopenia for  
874 patients in Biobank Japan. *Cancer Sci.* 104: 1074–1082.
- 875 McClellan J., and M.-C. King, 2010 Genetic heterogeneity in human disease. *Cell* 141: 210–217.
- 876 McGrath P. T., M. V. Rockman, M. Zimmer, H. Jang, E. Z. Macosko, *et al.*, 2009 Quantitative  
877 mapping of a digenic behavioral trait implicates globin variation in *C. elegans* sensory  
878 behaviors. *Neuron* 61: 692–699.
- 879 Nuver J., M. F. Lutke Holzik, M. van Zweeden, H. J. Hoekstra, C. Meijer, *et al.*, 2005 Genetic  
880 variation in the bleomycin hydrolase gene and bleomycin-induced pulmonary toxicity in  
881 germ cell cancer patients. *Pharmacogenet. Genomics* 15: 399–405.
- 882 Palopoli M. F., M. V. Rockman, A. TinMaung, C. Ramsay, S. Curwen, *et al.*, 2008 Molecular  
883 basis of the copulatory plug polymorphism in *Caenorhabditis elegans*. *Nature* 454: 1019–  
884 1022.



- 885 Pimentel H., N. L. Bray, S. Puente, P. Melsted, and L. Pachter, 2017 Differential analysis of  
886 RNA-seq incorporating quantification uncertainty. *Nat. Methods* 14: 687–690.
- 887 Purcell S., B. Neale, K. Todd-Brown, L. Thomas, M. A. R. Ferreira, *et al.*, 2007 PLINK: a tool  
888 set for whole-genome association and population-based linkage analyses. *Am. J. Hum.*  
889 *Genet.* 81: 559–575.
- 890 R Core Team, *R: A Language and Environment for Statistical Computing*. R Foundation for  
891 Statistical Computing.
- 892 Reddy K. C., E. C. Andersen, L. Kruglyak, and D. H. Kim, 2009 A polymorphism in *npr-1* is a  
893 behavioral determinant of pathogen susceptibility in *C. elegans*. *Science* 323: 382–384.
- 894 Relling M. V., and T. Dervieux, 2001 Pharmacogenetics and cancer therapy. *Nat. Rev. Cancer* 1:  
895 99–108.
- 896 Riedel C. G., R. H. Downen, G. F. Lourenco, N. V. Kirienko, T. Heimbucher, *et al.*, 2013 DAF-  
897 16 employs the chromatin remodeller SWI/SNF to promote stress resistance and longevity.  
898 *Nat. Cell Biol.* 15: 491–501.
- 899 Rockman M. V., and L. Kruglyak, 2009 Recombinational landscape and population genomics of  
900 *Caenorhabditis elegans*. *PLoS Genet.* 5: e1000419.
- 901 Rockman M. V., S. S. Skrovaneck, and L. Kruglyak, 2010 Selection at linked sites shapes  
902 heritable phenotypic variation in *C. elegans*. *Science* 330: 372–376.
- 903 Samuel B. S., H. Rowedder, C. Braendle, M.-A. Félix, and G. Ruvkun, 2016 *Caenorhabditis*  
904 *elegans* responses to bacteria from its natural habitats. *Proc. Natl. Acad. Sci. U. S. A.* 113:

- 905 E3941–9.
- 906 Santos R., O. Ursu, A. Gaulton, A. P. Bento, R. S. Donadi, *et al.*, 2017 A comprehensive map of  
907 molecular drug targets. *Nat. Rev. Drug Discov.* 16: 19–34.
- 908 Schmid T., L. B. Snoek, E. Fröhli, M. L. van der Bent, J. Kammenga, *et al.*, 2015 Systemic  
909 Regulation of RAS/MAPK Signaling by the Serotonin Metabolite 5-HIAA. *PLoS Genet.*  
910 11: e1005236.
- 911 Seidel H. S., M. V. Rockman, and L. Kruglyak, 2008 Widespread genetic incompatibility in *C.*  
912 *elegans* maintained by balancing selection. *Science* 319: 589–594.
- 913 Seidel H. S., M. Ailion, J. Li, A. van Oudenaarden, M. V. Rockman, *et al.*, 2011 A novel sperm-  
914 delivered toxin causes late-stage embryo lethality and transmission ratio distortion in *C.*  
915 *elegans*. *PLoS Biol.* 9: e1001115.
- 916 Sham P. C., and S. M. Purcell, 2014 Statistical power and significance testing in large-scale  
917 genetic studies. *Nat. Rev. Genet.* 15: 335–346.
- 918 Shen B., L. Du, C. Sanchez, D. J. Edwards, M. Chen, *et al.*, 2002 Cloning and characterization of  
919 the bleomycin biosynthetic gene cluster from *Streptomyces verticillus* ATCC15003. *J. Nat.*  
920 *Prod.* 65: 422–431.
- 921 Shimko T. C., and E. C. Andersen, 2014 COPASutils: an R package for reading, processing, and  
922 visualizing data from COPAS large-particle flow cytometers. *PLoS One* 9: e111090.
- 923 Snoek L. B., H. E. Orbidans, J. J. Stastna, A. Aartse, M. Rodriguez, *et al.*, 2014 Widespread  
924 genomic incompatibilities in *Caenorhabditis elegans*. *G3* 4: 1813–1823.

- 925 Stein L., P. Sternberg, R. Durbin, J. Thierry-Mieg, and J. Spieth, 2001 WormBase: network  
926 access to the genome and biology of *Caenorhabditis elegans*. *Nucleic Acids Res.* 29: 82–  
927 86.
- 928 Stubbe J., and J. W. Kozarich, 1987 Mechanisms of bleomycin-induced DNA degradation.  
929 *Chem. Rev.* 87: 1107–1136.
- 930 Swan K. A., D. E. Curtis, K. B. McKusick, A. V. Voinov, F. A. Mapa, *et al.*, 2002 High-  
931 throughput gene mapping in *Caenorhabditis elegans*. *Genome Res.* 12: 1100–1105.
- 932 Taylor E. M., and A. R. Lehmann, 1998 Conservation of eukaryotic DNA repair mechanisms.  
933 *Int. J. Radiat. Biol.* 74: 277–286.
- 934 Thompson O. A., L. B. Snoek, H. Nijveen, M. G. Sterken, R. J. M. Volkers, *et al.*, 2015  
935 Remarkably Divergent Regions Punctuate the Genome Assembly of the *Caenorhabditis*  
936 *elegans* Hawaiian Strain CB4856. *Genetics* 200: 975–989.
- 937 Turek M., J. Besseling, J.-P. Spies, S. König, and H. Bringmann, 2016 Sleep-active neuron  
938 specification and sleep induction require FLP-11 neuropeptides to systemically induce  
939 sleep. *Elife* 5. <https://doi.org/10.7554/eLife.12499>
- 940 Wicks S. R., R. T. Yeh, W. R. Gish, R. H. Waterston, and R. H. Plasterk, 2001 Rapid gene  
941 mapping in *Caenorhabditis elegans* using a high density polymorphism map. *Nat. Genet.*  
942 28: 160–164.
- 943 World Health Organization, 2018
- 944 Zdraljevic S., C. Strand, H. S. Seidel, D. E. Cook, J. G. Doench, *et al.*, 2017 Natural variation in

- 945 a single amino acid substitution underlies physiological responses to topoisomerase II  
946 poisons. PLoS Genet. 13: e1006891.
- 947 Zdraljevic S., and E. C. Andersen, 2017 Natural diversity facilitates the discovery of conserved  
948 chemotherapeutic response mechanisms. Curr. Opin. Genet. Dev. 47: 41–47.
- 949 Zdraljevic S., B. W. Fox, C. Strand, O. Panda, F. J. Tenjo, *et al.*, 2019 Natural variation in *C.*  
950 *elegans* arsenic toxicity is explained by differences in branched chain amino acid  
951 metabolism. Elife 8. <https://doi.org/10.7554/eLife.40260>
- 952 Zhang L., L. Li, L. Yan, Z. Ming, Z. Jia, *et al.*, 2018 Structural and Biochemical Characterization  
953 of Endoribonuclease Nsp15 Encoded by Middle East Respiratory Syndrome Coronavirus. J.  
954 Virol. 92. <https://doi.org/10.1128/JVI.00893-18>
- 955

956

## Figure Legends

957 **Figure 1:** Linkage-mapping analysis of bleomycin-response variation is shown for residual  
958 median optical density in bleomycin. **A.** On the x-axis, each of 13,001 genomic markers, split by  
959 chromosome, were tested for correlation with phenotypic variation across the RIAIL panel. The  
960 log of the odds (LOD) score for each marker is reported on the y-axis. Each significant  
961 quantitative trait locus (QTL) is indicated by a red triangle at the peak marker, and a blue ribbon  
962 shows the 95% confidence interval around the peak marker. The total amount of phenotypic  
963 variance across the RIAIL panel explained by the genotype at each peak marker is shown as a  
964 percentage. **B.** Residual median optical density phenotypes (y-axis), split by allele at each QTL  
965 peak marker (x-axis), are shown. For each significant QTL, phenotypes of RIAILs that contain  
966 the N2 allele (orange) are compared to RIAILs that contain the CB4856 allele (blue). Phenotypes  
967 are shown as Tukey box plots with the phenotypes of each individual strain shown as points  
968 behind the box plots.

969

970 **Figure 2:** Phenotypes and genotypes of near-isogenic lines (NILs) are shown. **(A)** Phenotypes  
971 for each strain are shown as Tukey box plots, with strain name on the y-axis and residual  
972 bleomycin median optical density on the x-axis. Each point is a biological replicate. Parental  
973 strain box plots are colored by their genetic background, with orange indicating an N2  
974 background and blue indicating a CB4856 genetic background. NILs are shown as grey box  
975 plots. A red asterisk indicates a significant difference between the phenotype of a given strain  
976 and the phenotype of the corresponding parental strain ( $p < 0.05$ , Tukey HSD). **(B)**  
977 Chromosomal representations of chromosome V are shown for each of the strains in **A.** Strain  
978 names are reported on the y-axis, and genomic position (Mb) is shown on the x-axis. Blocks of

979 color indicate genotypes of genomic regions with orange indicating the N2 genotype and blue  
980 indicating the CB4856 genotype. Vertical red lines mark the confidence interval of the QTL  
981 from linkage mapping. (C) Background genotypes are represented as rectangles with colors  
982 indicating N2 (orange) or CB4856 (blue) genetic backgrounds.

983

984 **Figure 3:** Bleomycin responses of the deletion alleles for each candidate gene are shown. **A.** The  
985 linkage mapping QTL confidence interval (light blue) with 20 kb on the left and the right is  
986 displayed. Each protein-coding gene in the region is indicated by an arrow that points in the  
987 direction of transcription. Genes with non-synonymous variants between the N2 and CB4856  
988 strains are shown as red arrows and are labeled with their gene name. **B.** Deletion alleles for each  
989 of these genes were tested in response to bleomycin. Bleomycin responses are shown as Tukey  
990 box plots, with the strain name on the x-axis, split by gene, and residual median optical density  
991 on the y-axis. Each point is a biological replicate. Strains are colored by their background  
992 genotype (orange indicates an N2 genetic background, and blue indicates a CB4856 genetic  
993 background). For each gene, two independent deletion alleles in each background were created  
994 and tested. Red asterisks indicate a significant difference ( $p < 0.05$ , Tukey HSD) between a strain  
995 with a deletion and the parental strain that has the same genetic background. Depictions of each  
996 deletion allele are shown below the phenotype for each candidate gene. White rectangles indicate  
997 exons and diagonal lines indicate introns. The 5' and 3' UTRs are shown by grey rectangles and  
998 triangles, respectively. The region of the gene that was deleted by CRISPR-Cas9 directed  
999 genome editing is shown as a red bar beneath each gene model.

1000

1001 **Figure 4:** Linkage mapping of the *H19N07.3* expression difference among RIAILs is shown. **A.**  
1002 On the x-axis, each of 13,001 genomic markers, split by chromosome, were tested for correlation  
1003 with *H19N07.3* expression variation across the RIAIL panel. The log of the odds (LOD) score  
1004 for each marker is reported on the y-axis. The significant quantitative trait locus (QTL) is  
1005 indicated by a red triangle at the peak marker, and a blue ribbon shows the 95% confidence  
1006 interval around the peak marker. The total amount of expression variance across the RIAIL panel  
1007 explained by the genotype at the peak marker is printed as a percentage. **B.** RIAIL gene  
1008 expression (y-axis), split by allele at the QTL peak marker (x-axis) is shown. Phenotypes of  
1009 RIAILs containing the N2 allele (orange) are compared to RIAILs containing the CB4856 allele  
1010 (blue). Phenotypes are shown as Tukey box plots, and each point is the *H19N07.3* expression of  
1011 an individual strain. **C.** The correlation between animal size in bleomycin and *H19N07.3*  
1012 expression is shown as a scatterplot, with each RIAIL shown as a point. Each axis was scaled to  
1013 have a mean of zero and a standard deviation of one. The line of best fit is shown in blue. The  
1014 identity line is shown in black for reference.

1015  
1016 **Figure 5:** Bleomycin responses of *H19N07.3* deletion alleles are shown as Tukey box plots, with  
1017 the strain name on the x-axis, split by genotype, and residual median optical density on the y-  
1018 axis. Each point is a biological replicate. Strains are colored by their background genotype  
1019 (orange indicates an N2 genetic background, and blue indicates a CB4856 genetic background).  
1020 Two independent deletion alleles in each genetic background were created and tested. Red  
1021 asterisks indicate a significant difference ( $p < 0.05$ , Tukey HSD) between a strain with a deletion  
1022 and the parental strain that has the same genetic background. A depiction of the deletion allele is  
1023 shown below the box plots. White rectangles indicate exons, and diagonal lines indicate introns.

1024 The 5' and 3' UTRs are shown by grey rectangles and triangles, respectively. The region of the  
1025 gene that was deleted by CRISPR-Cas9 directed genome editing is shown as a red bar beneath  
1026 the gene model.

1027

1028 **Figure 6:** Results of the *scb-1* reciprocal hemizyosity assay are shown. The y-axis shows the  
1029 residual median optical density for each strain reported along the x-axis. Bleomycin responses  
1030 are reported as Tukey box plots where each point is a biological replicate. The genotypes of each  
1031 strain are shown as colored rectangles beneath each box plot, where each rectangle represents a  
1032 homolog (orange rectangles are an N2 genotype, and blue rectangles are a CB4856 genotype).  
1033 Maternal homologs are shown on top and paternal homologs are shown on bottom. Grey  
1034 triangles indicate a deletion of *scb-1*, placed on the rectangle showing the background into which  
1035 the deletion was introduced. The box plots for the parental strains (N2 and CB4856, on the left)  
1036 are colored according to genotype.

1037

1038 **Figure 7:** A genome-wide association study for residual median optical density in bleomycin for  
1039 83 wild isolates is shown. On the x-axis, each genomic marker, split by chromosome, was tested  
1040 for correlation with phenotypic variation across the wild isolates. The  $\log_{10}(p)$  value of these  
1041 correlations are reported on the y-axis. Each marker that reached a significance threshold  
1042 determined by eigenvalue decomposition of the SNP correlation matrix is colored in red. QTL  
1043 regions of interest are indicated by blue regions surrounding the significant markers.



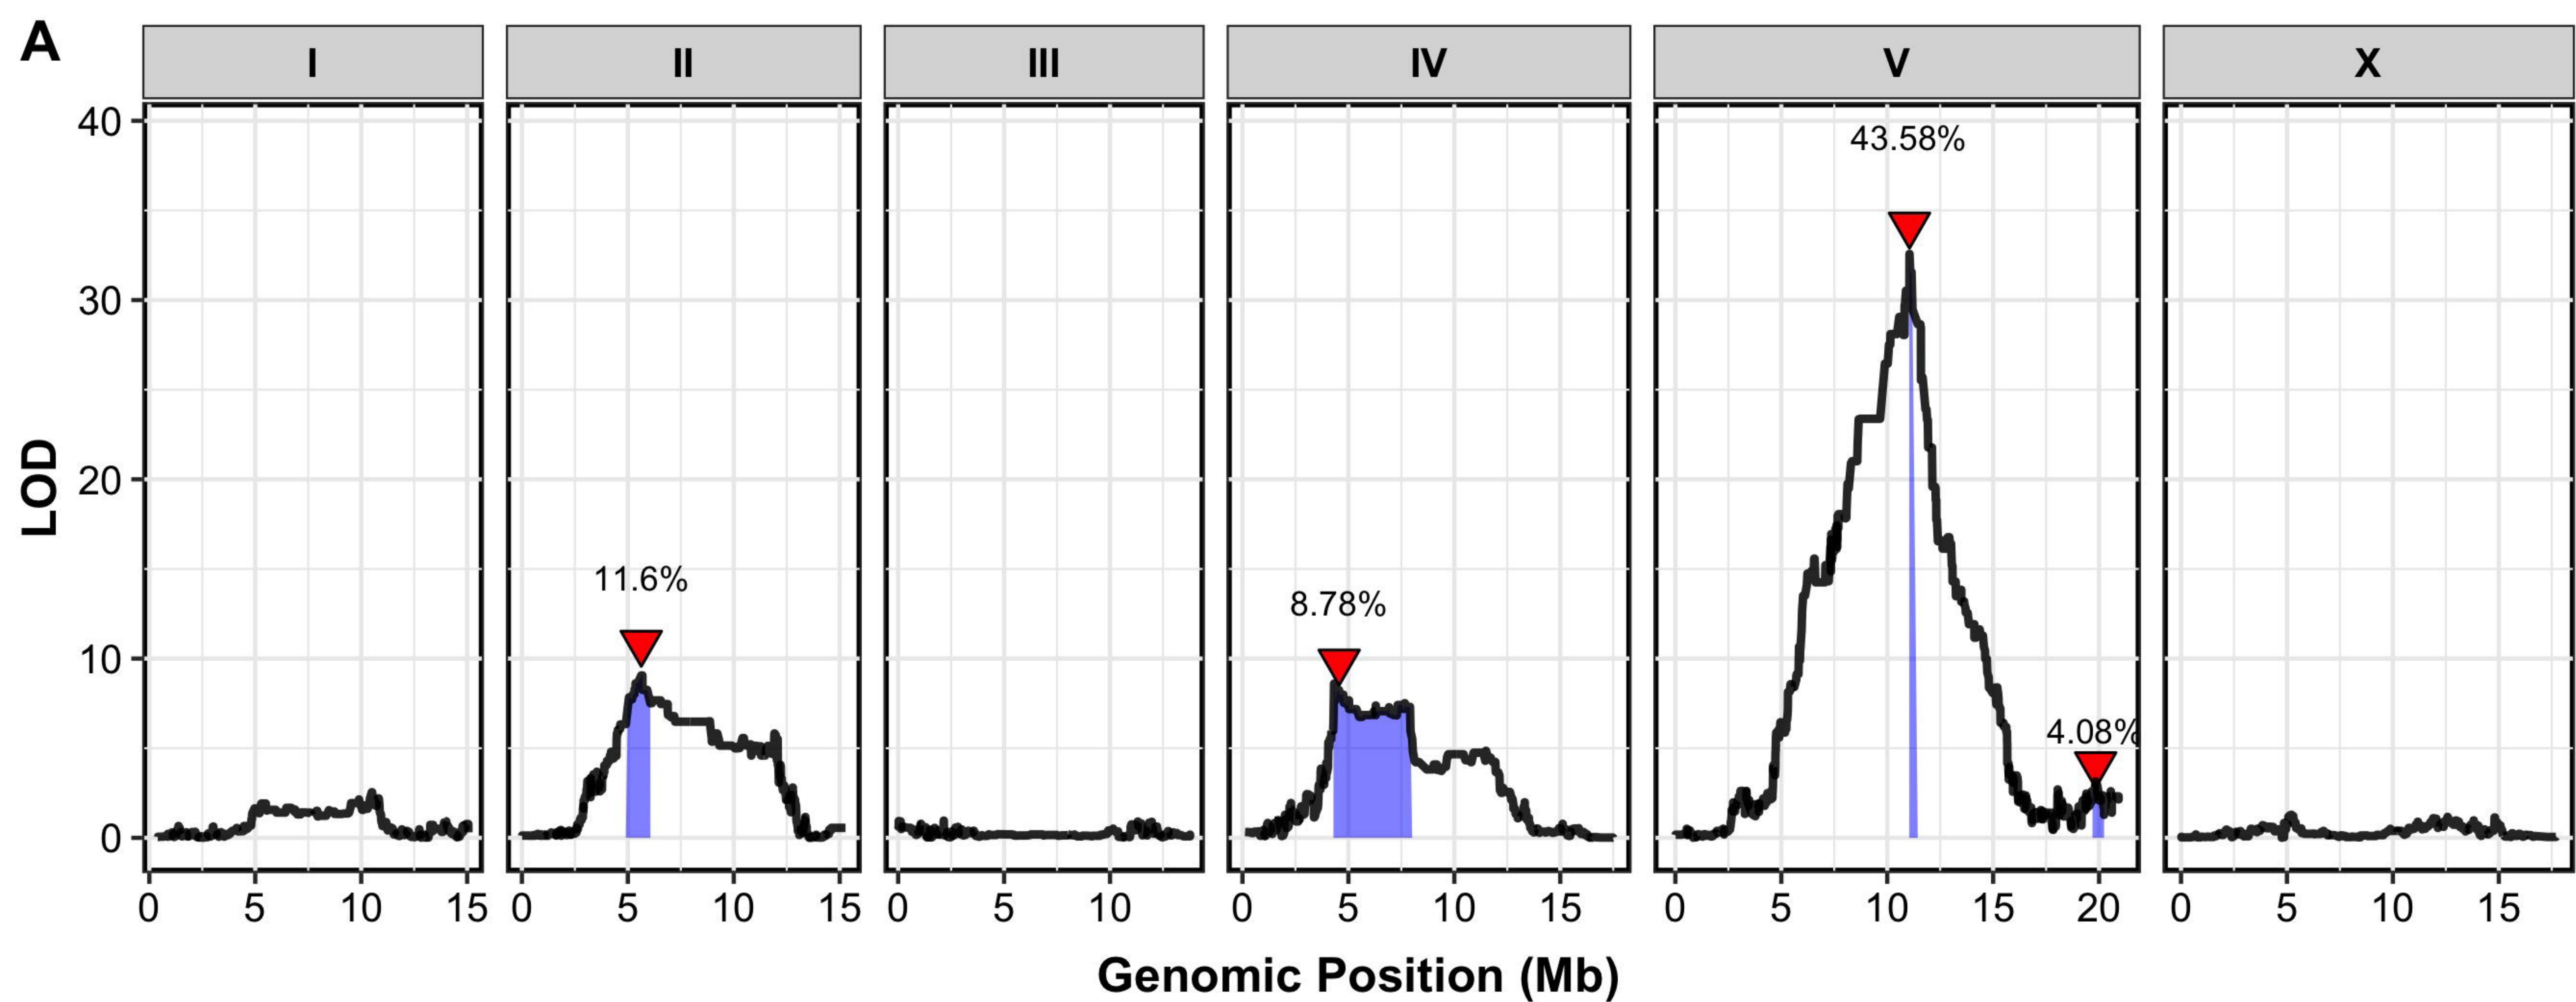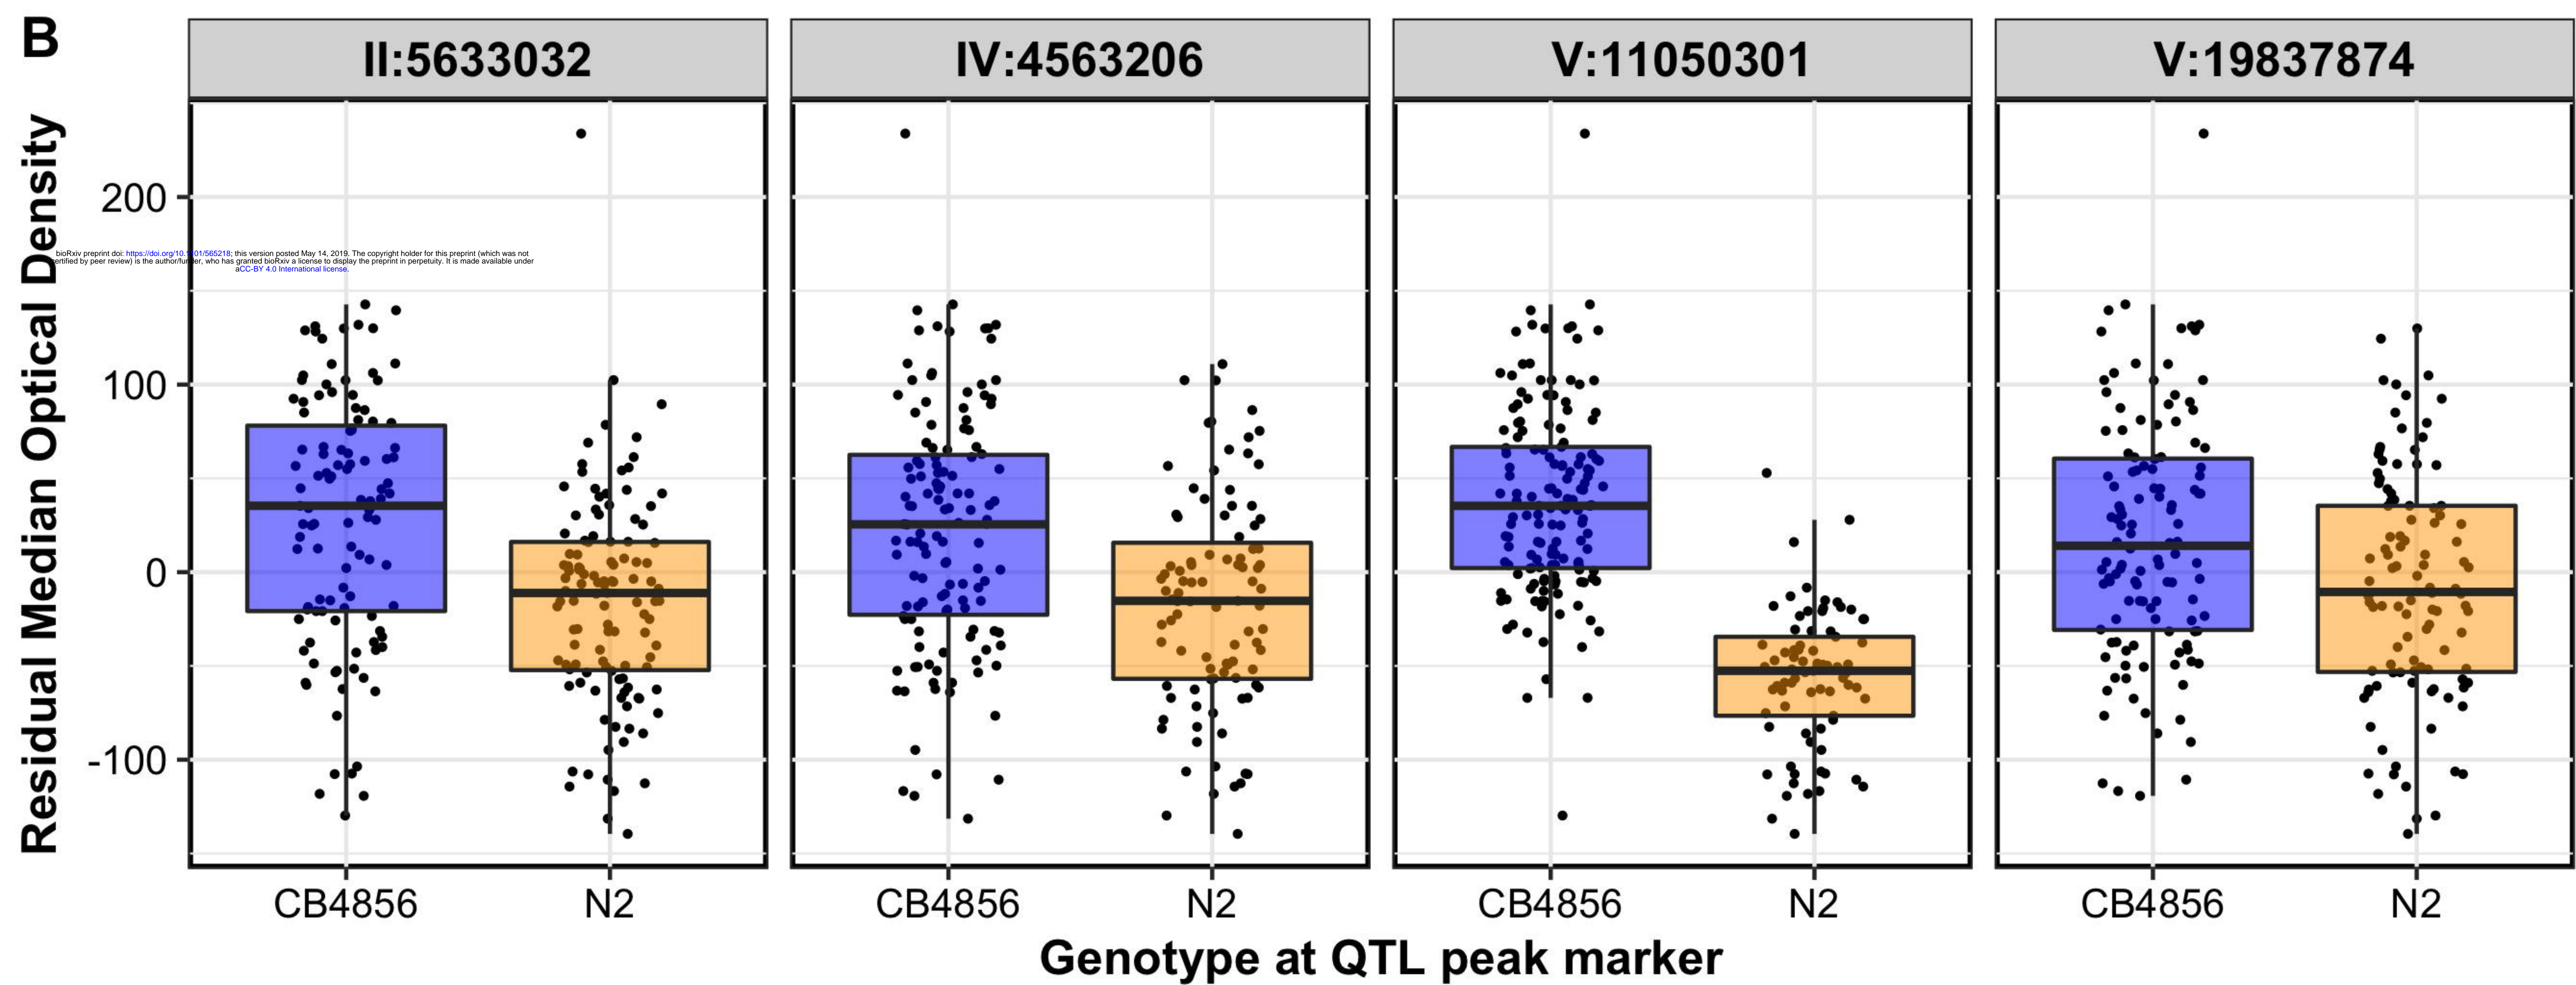



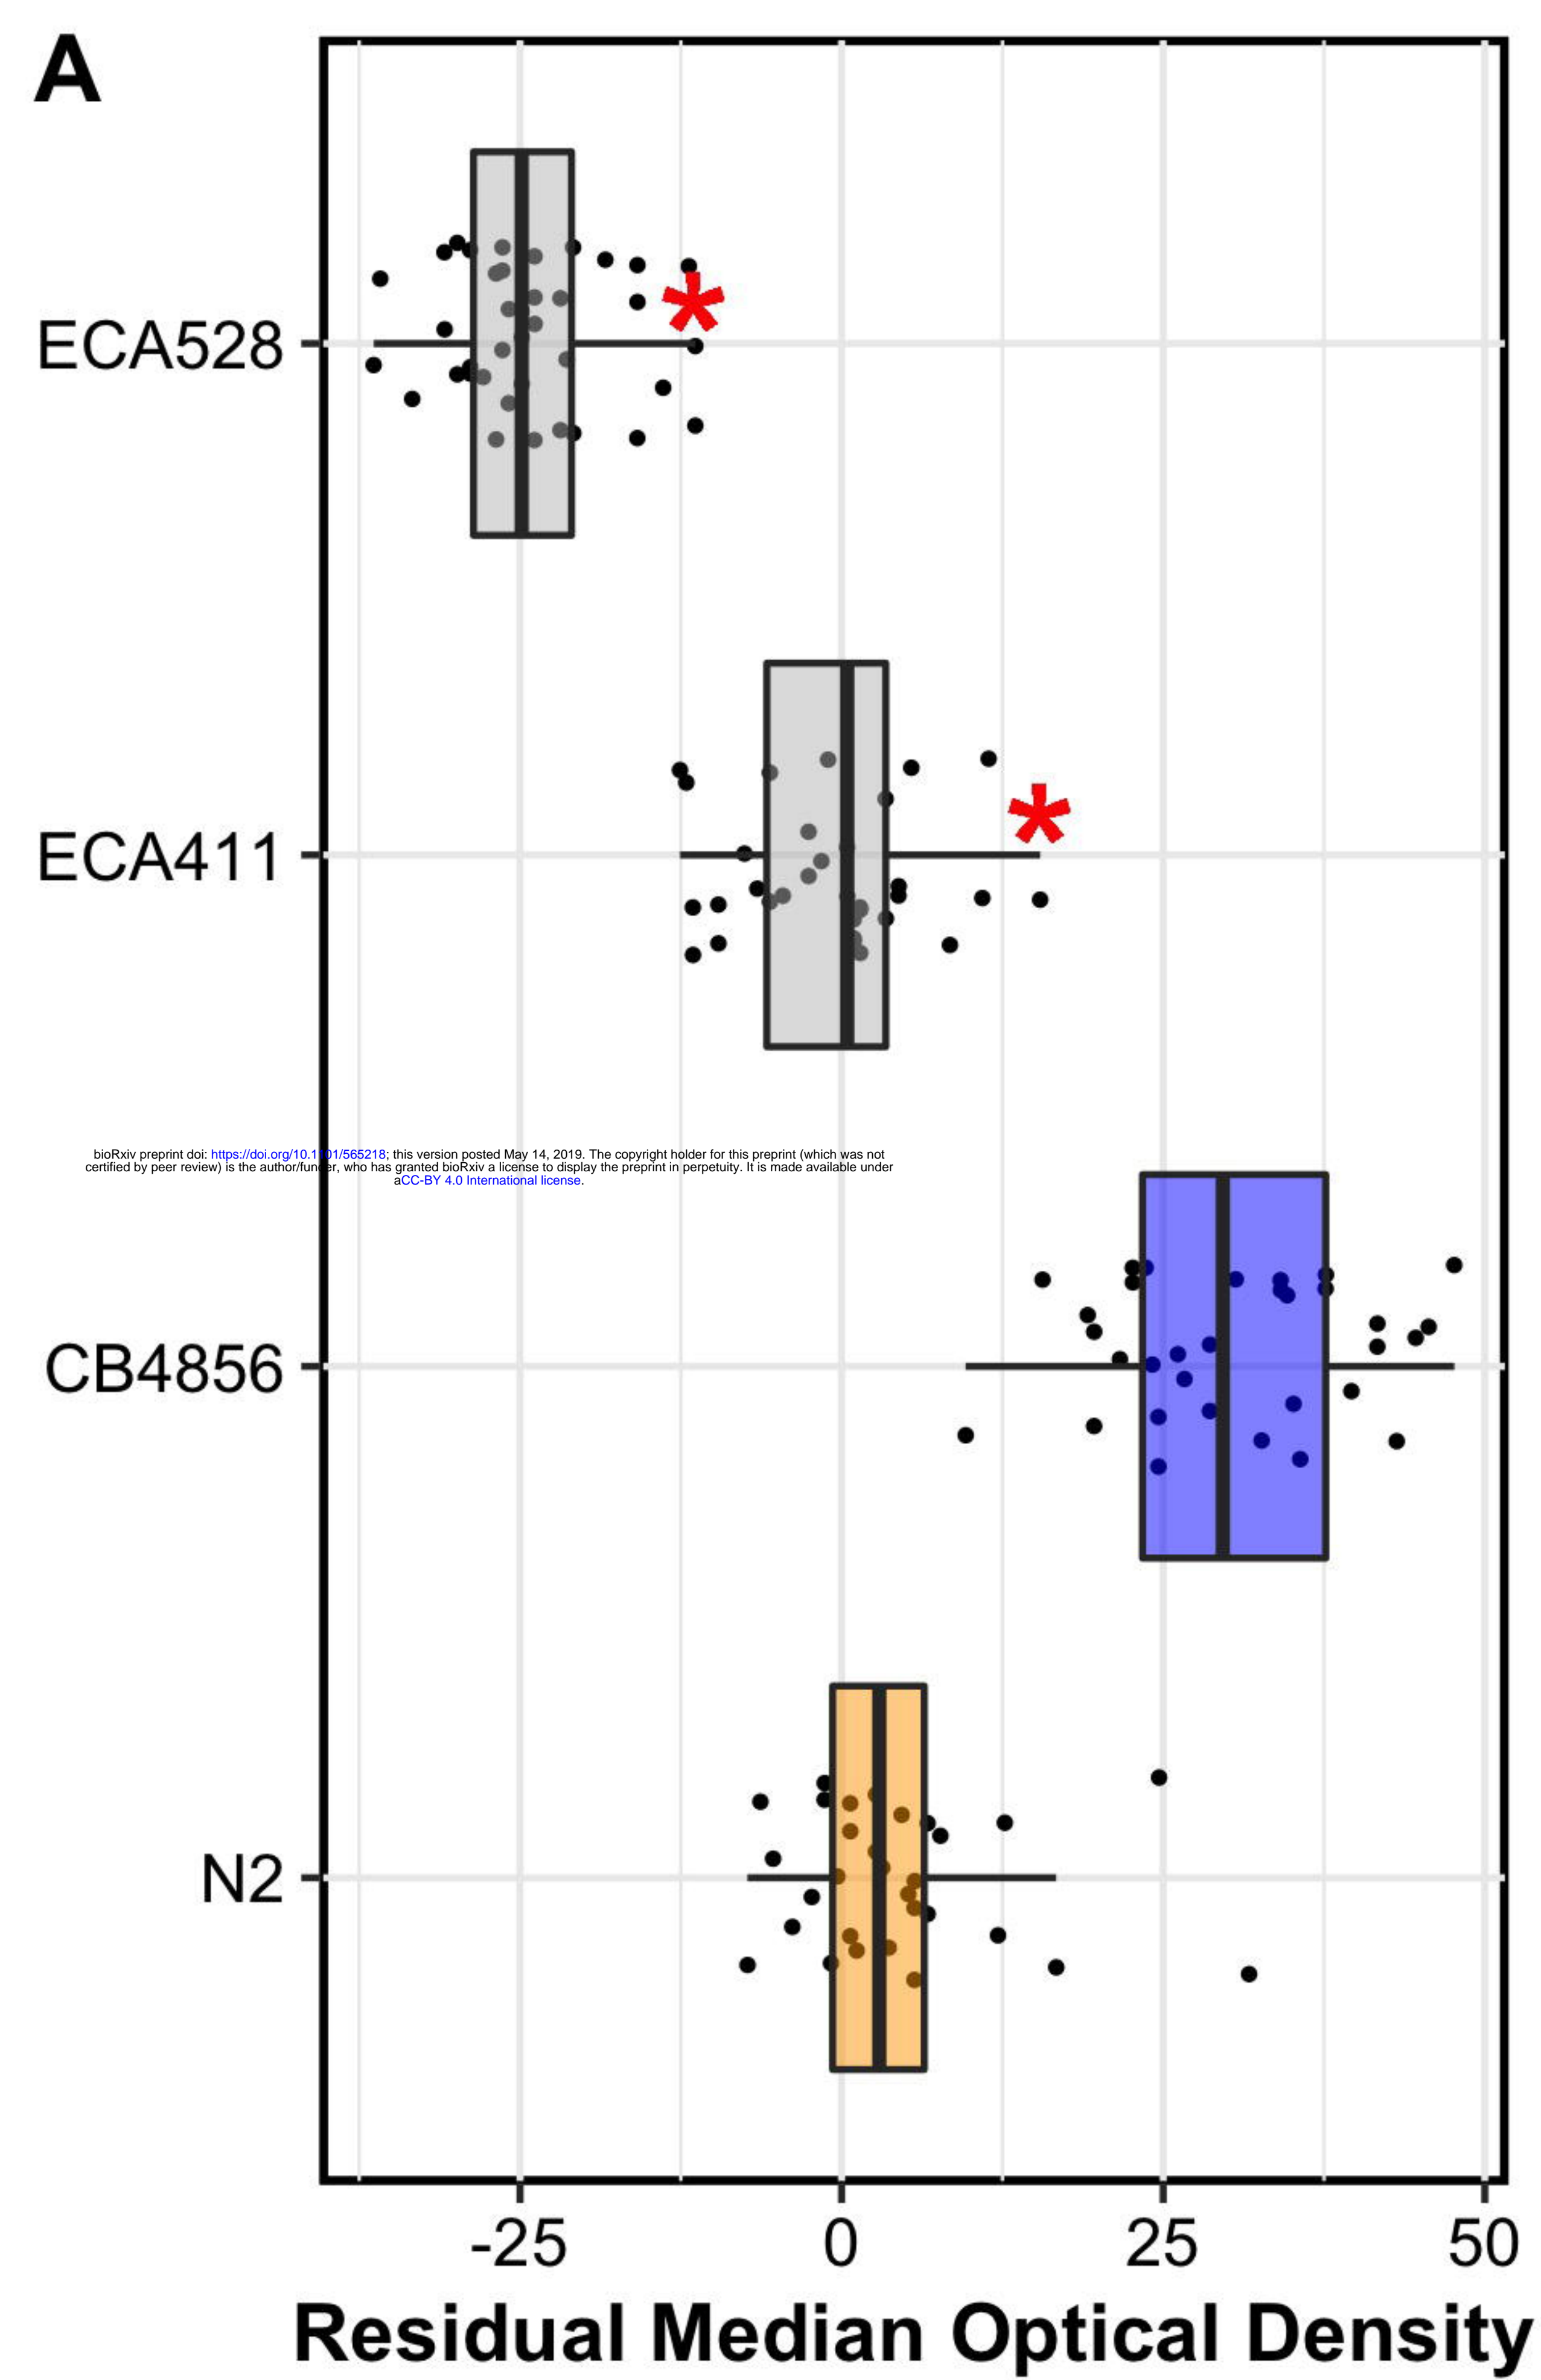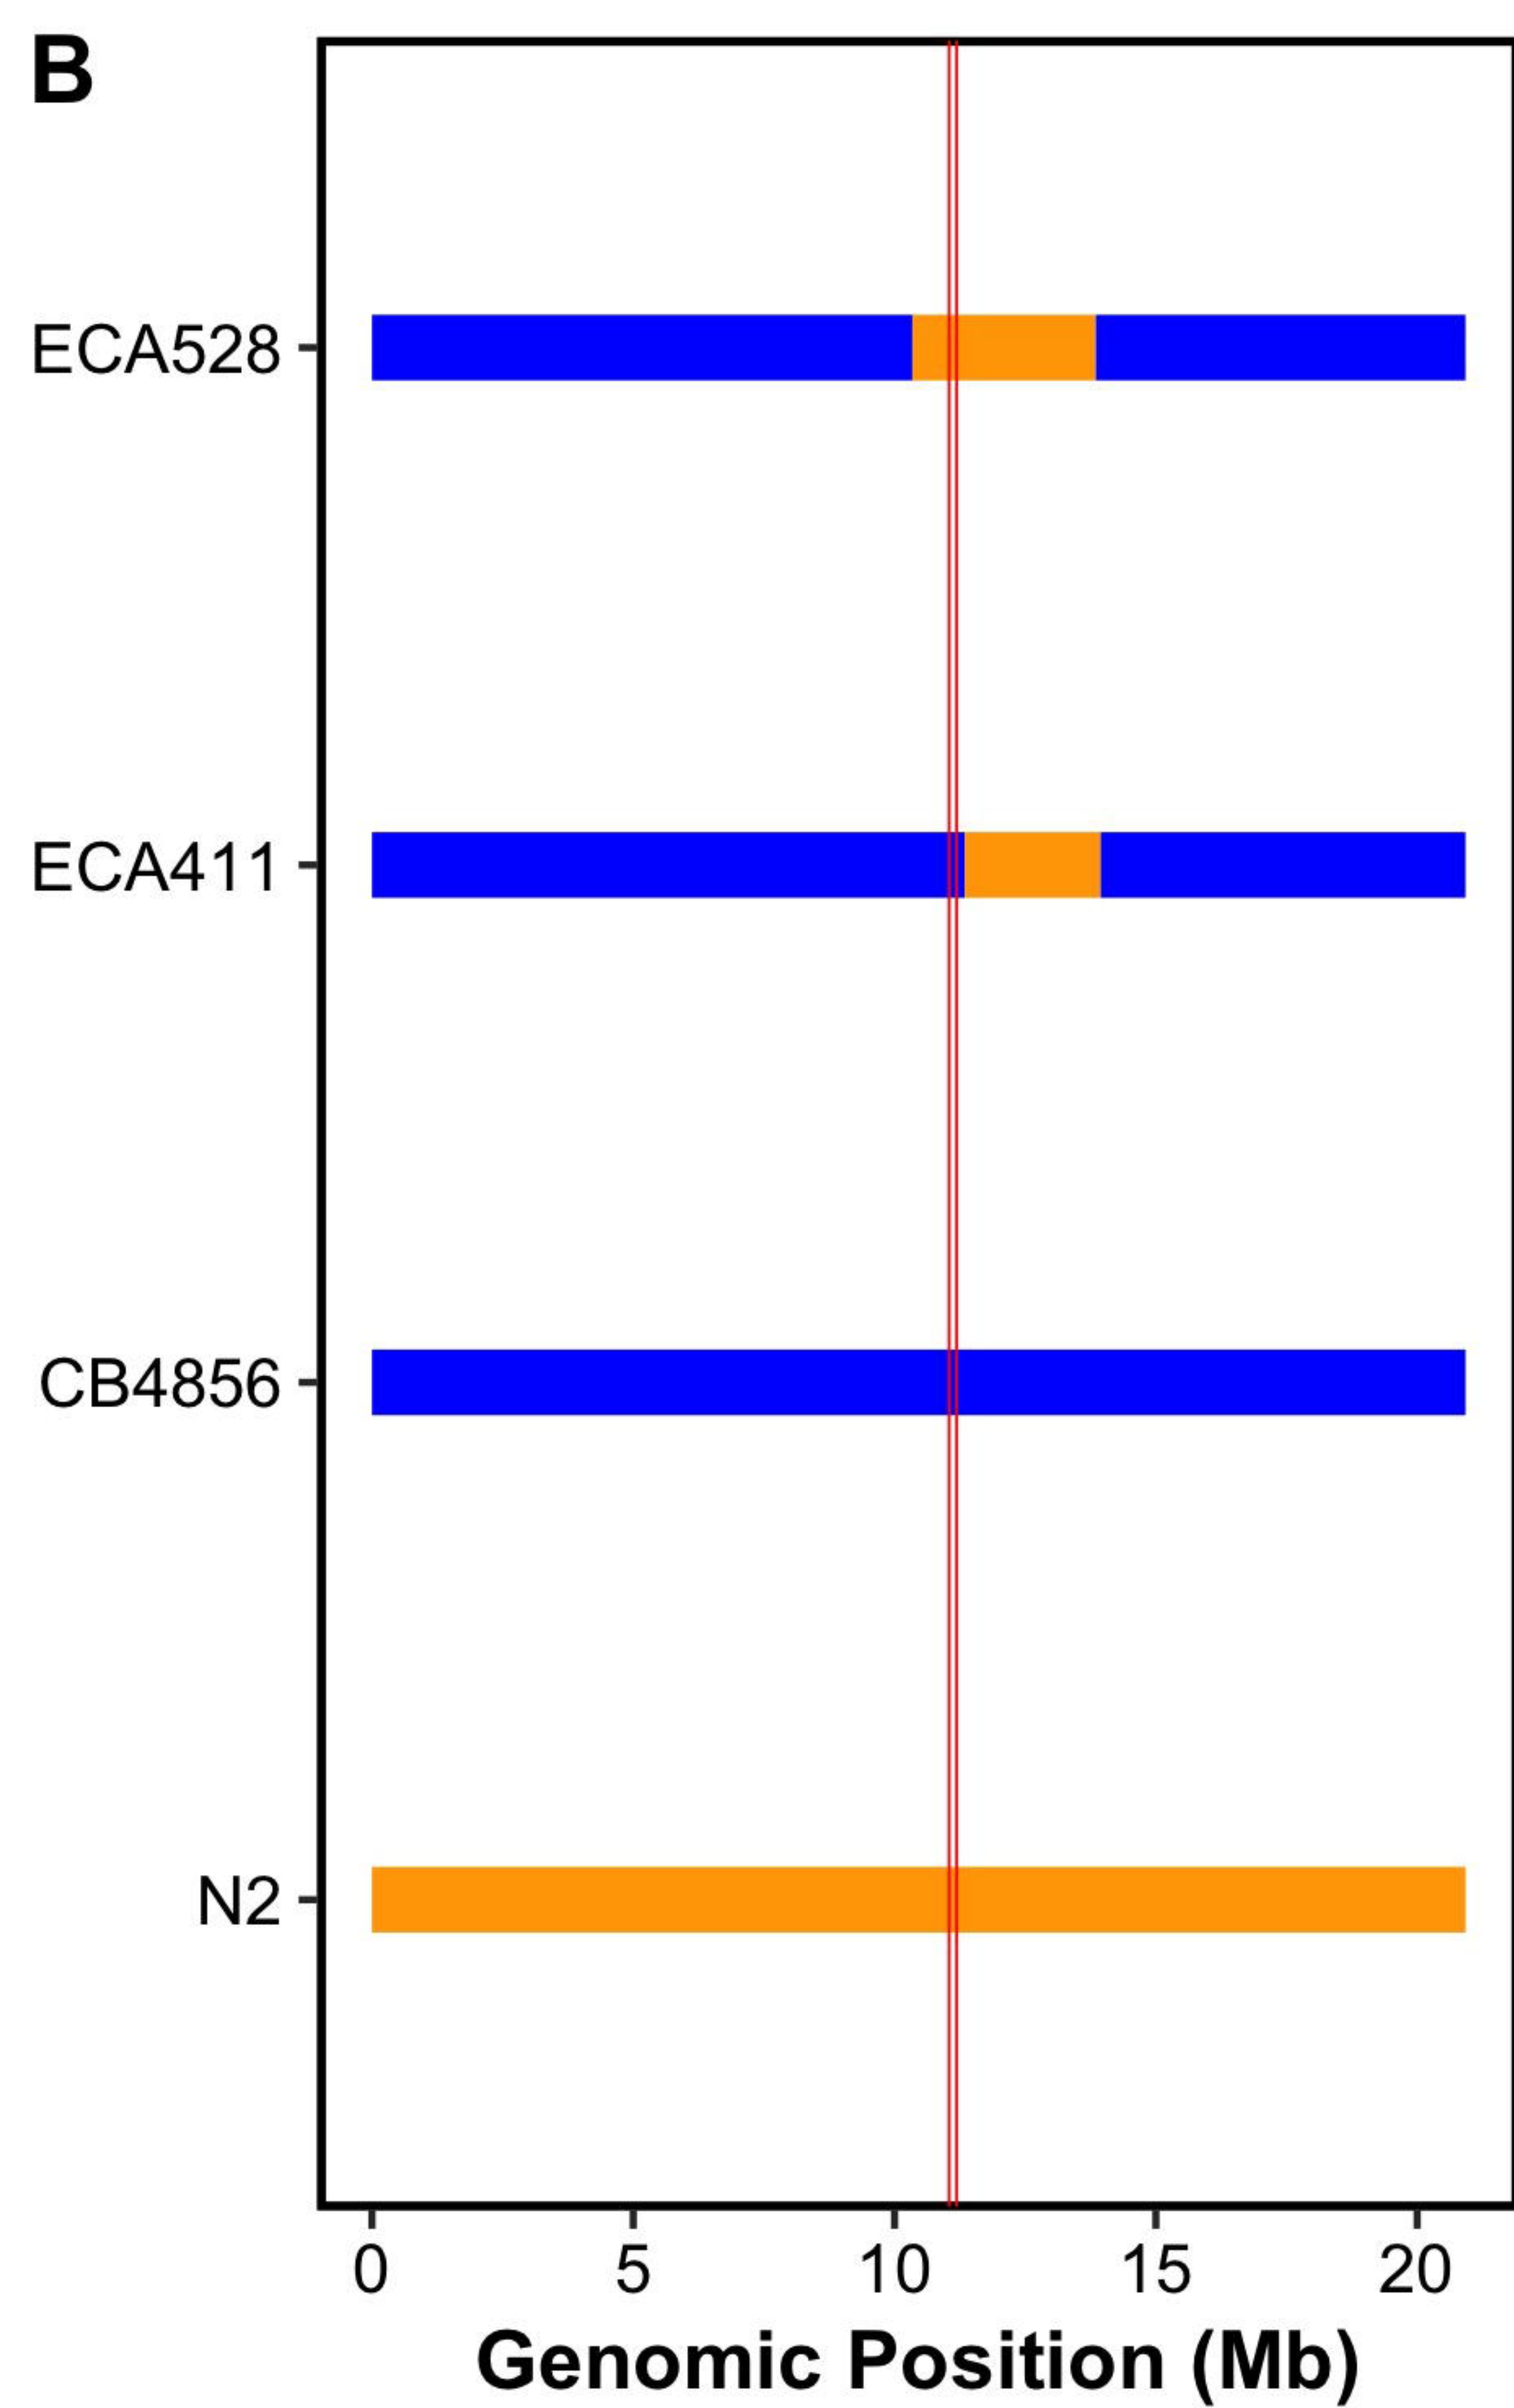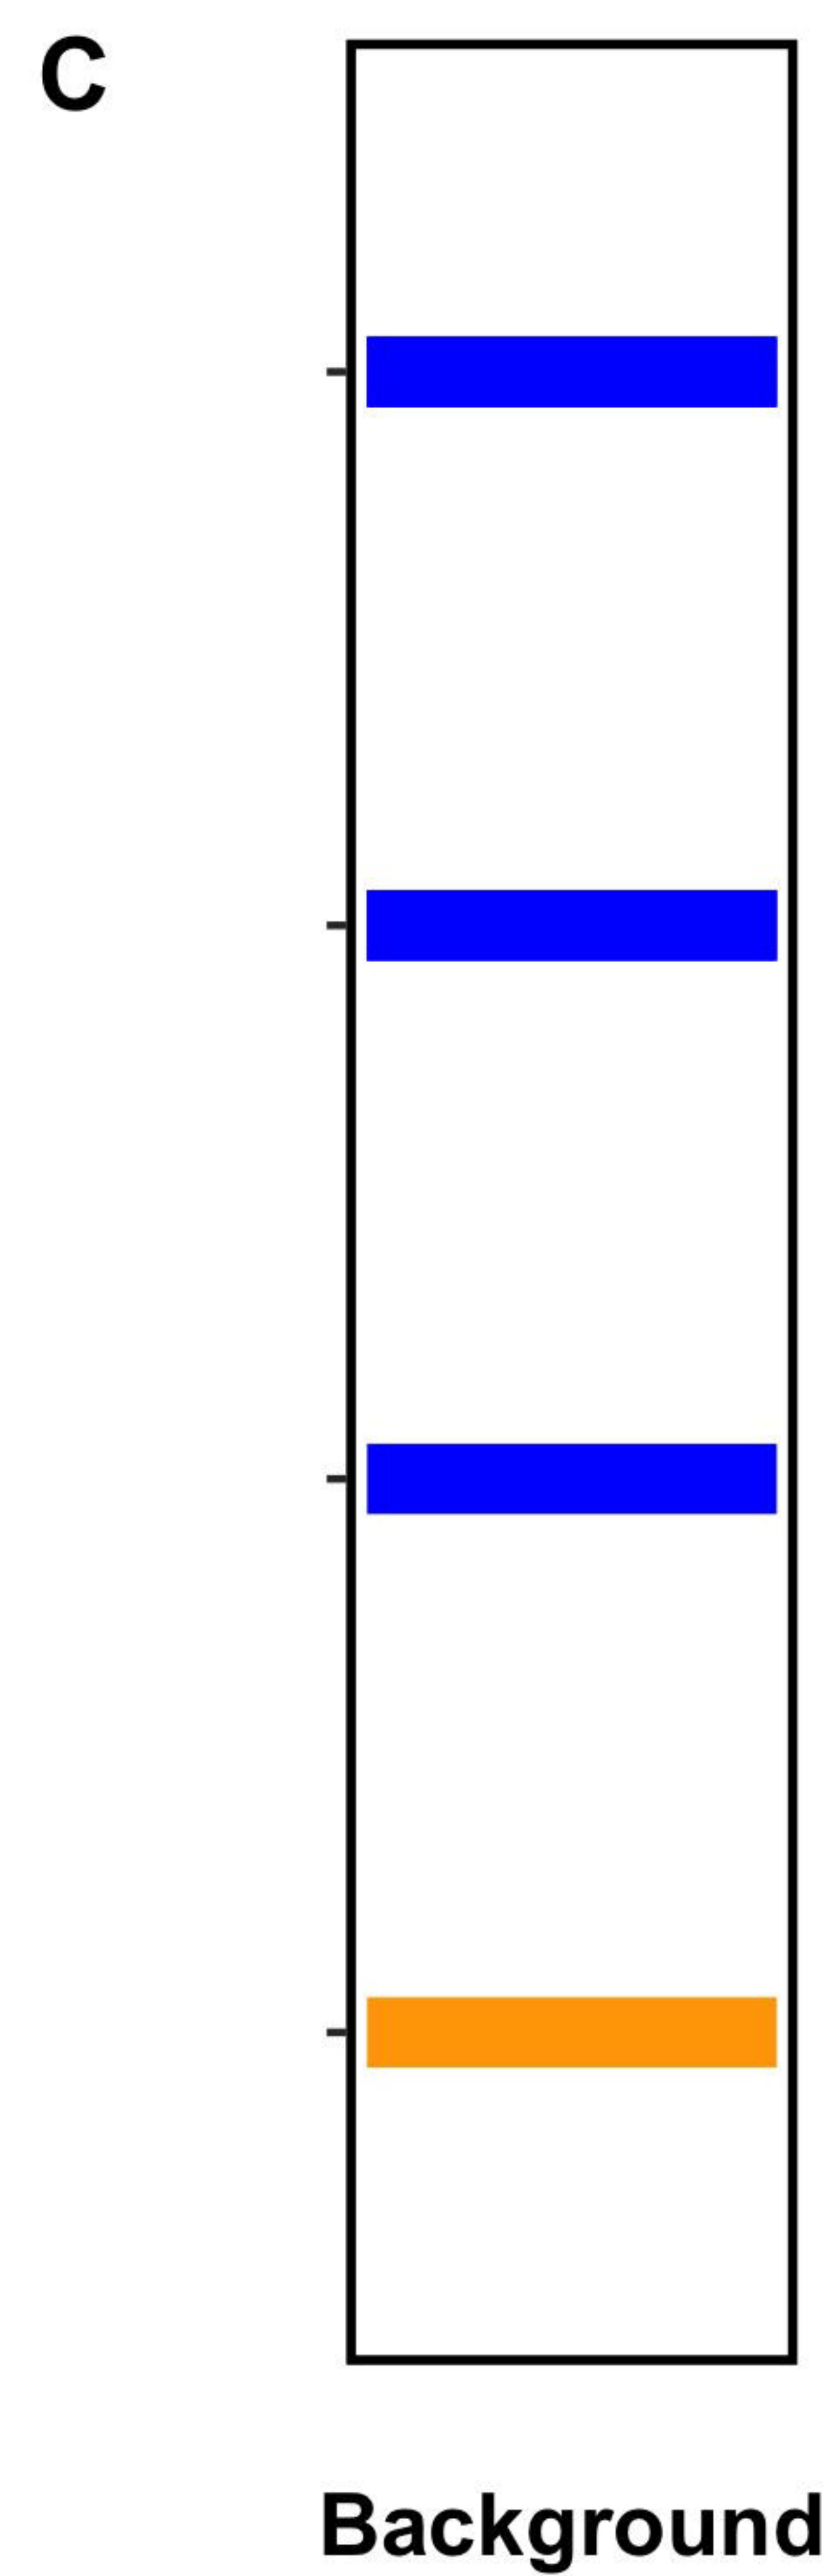



A

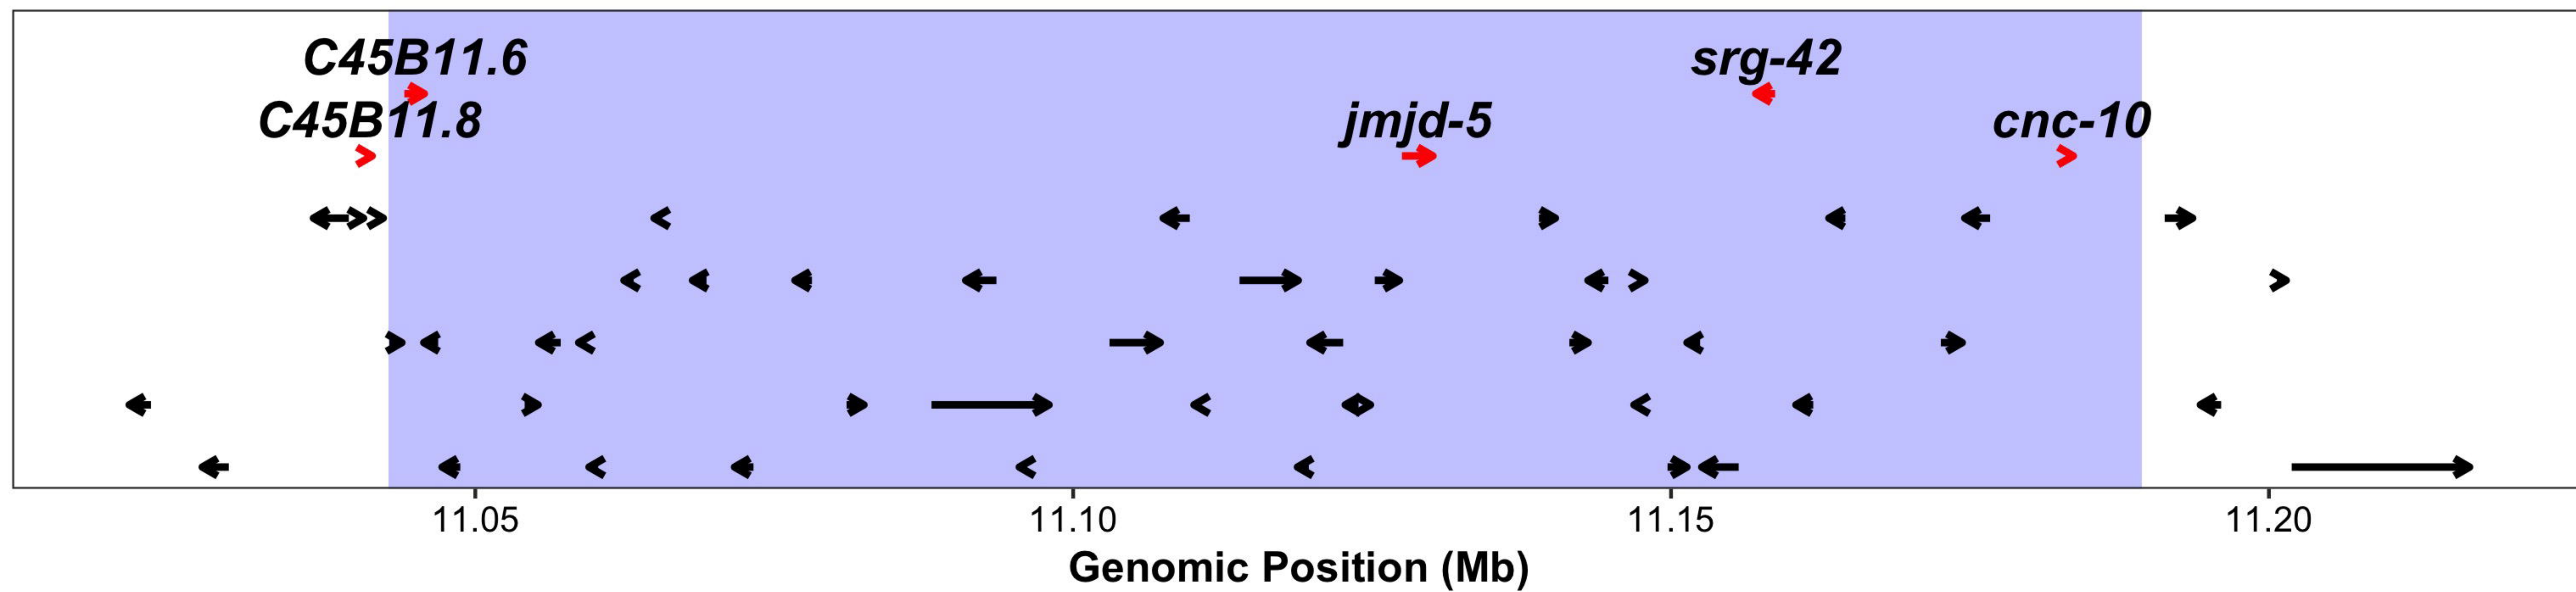

B

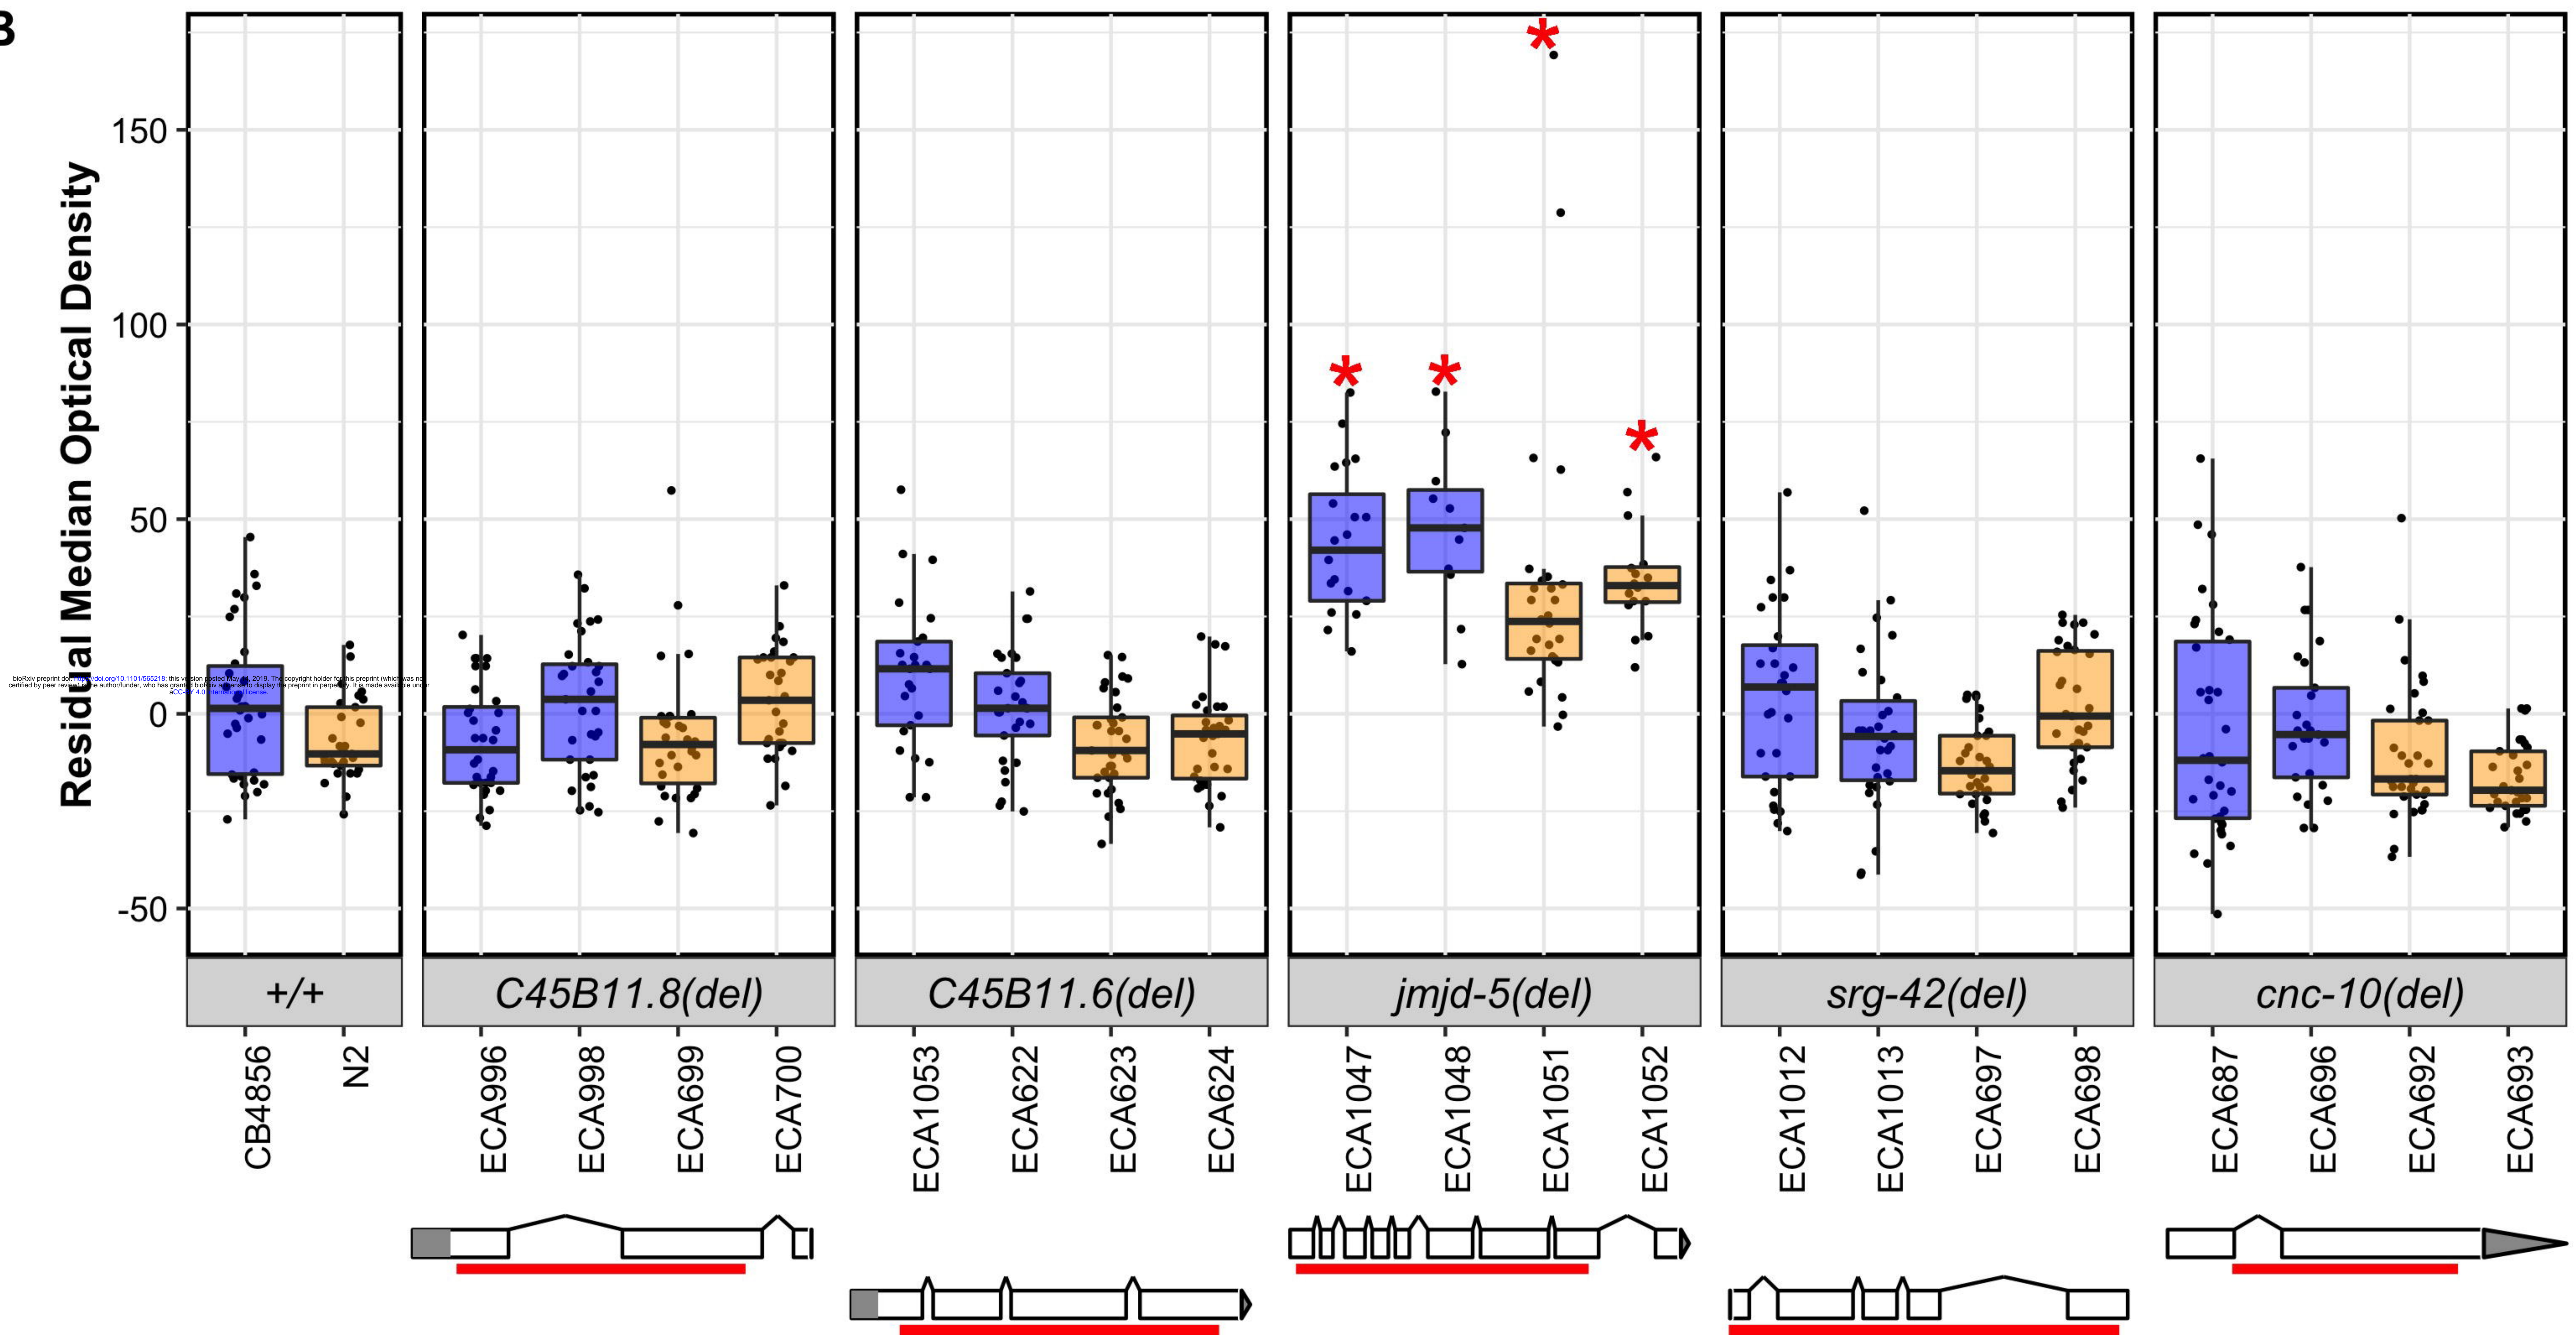



**A****H19N07.3**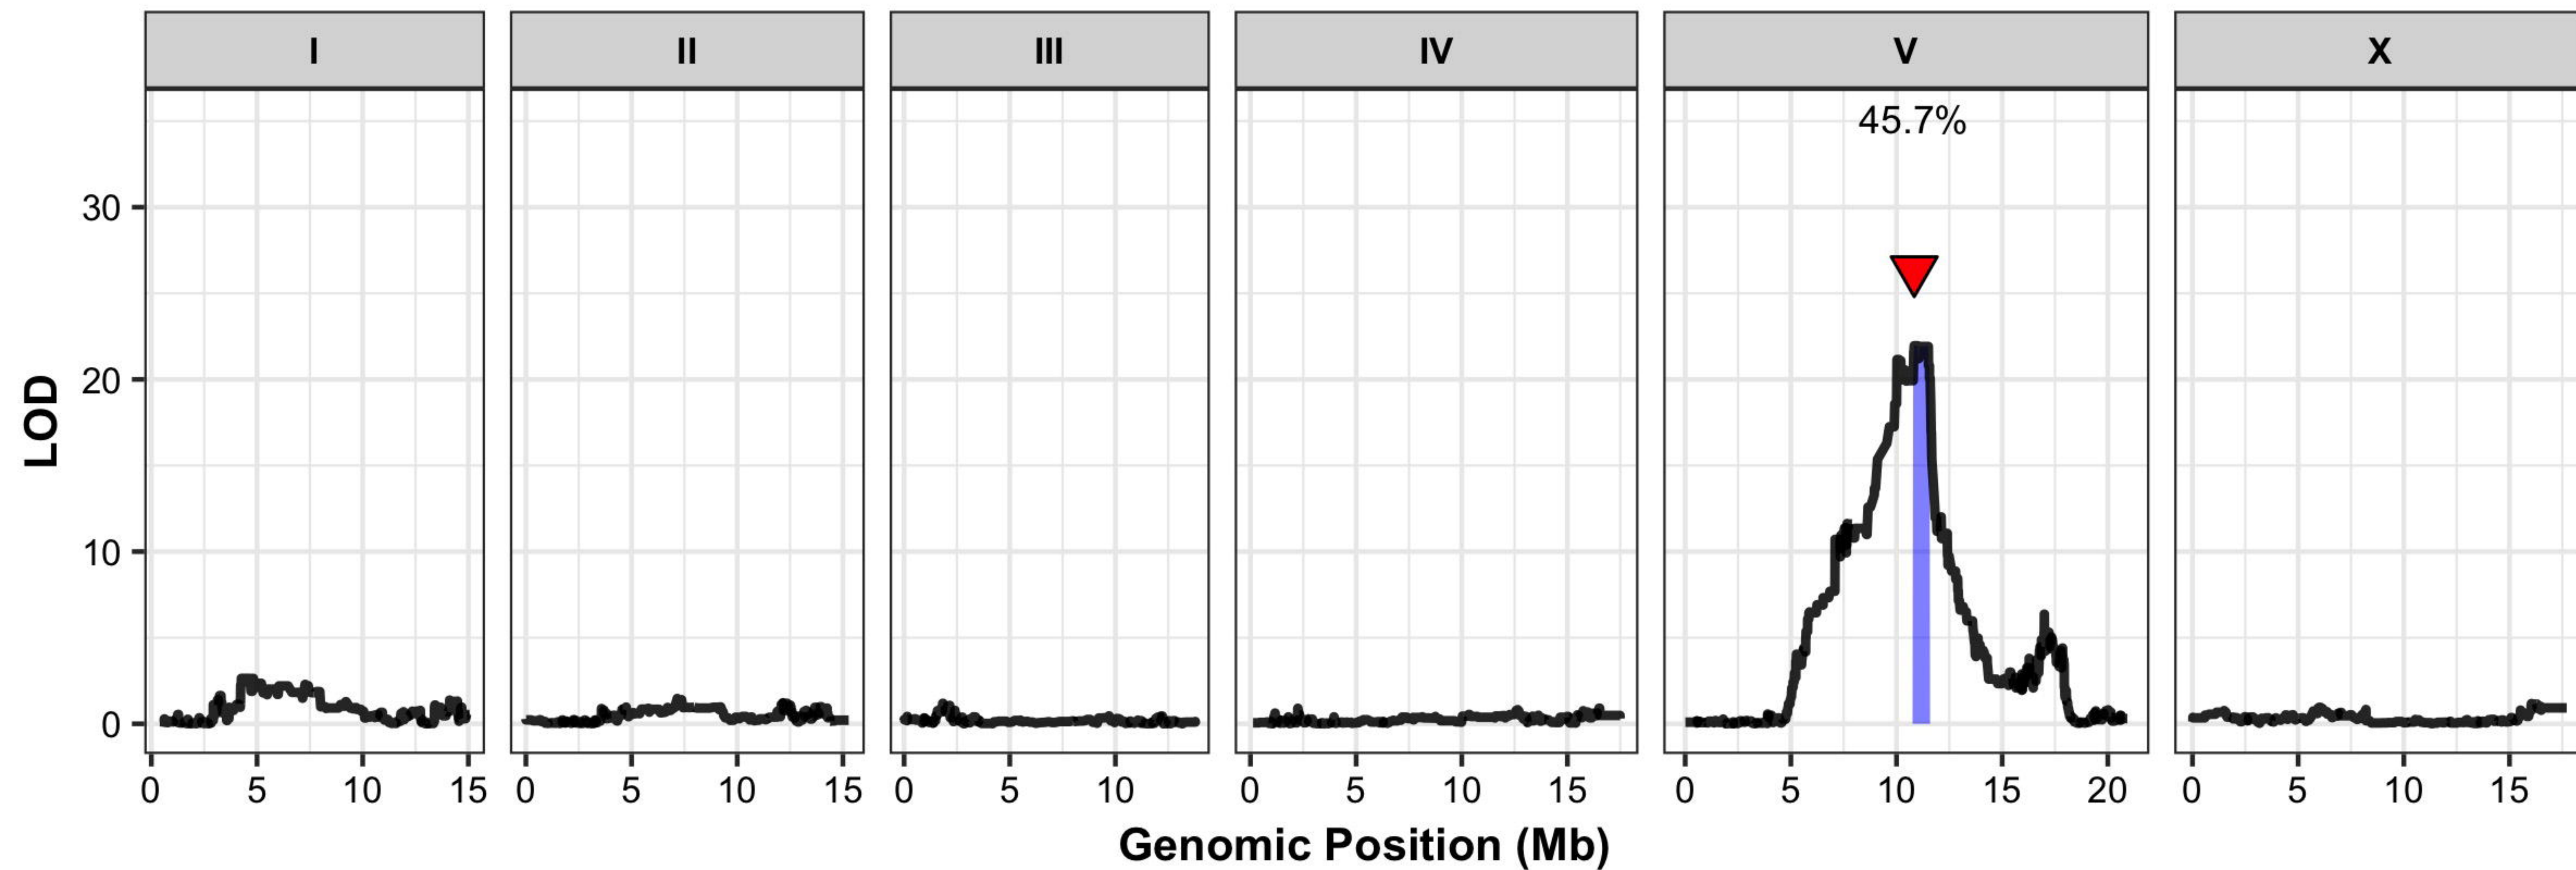**B**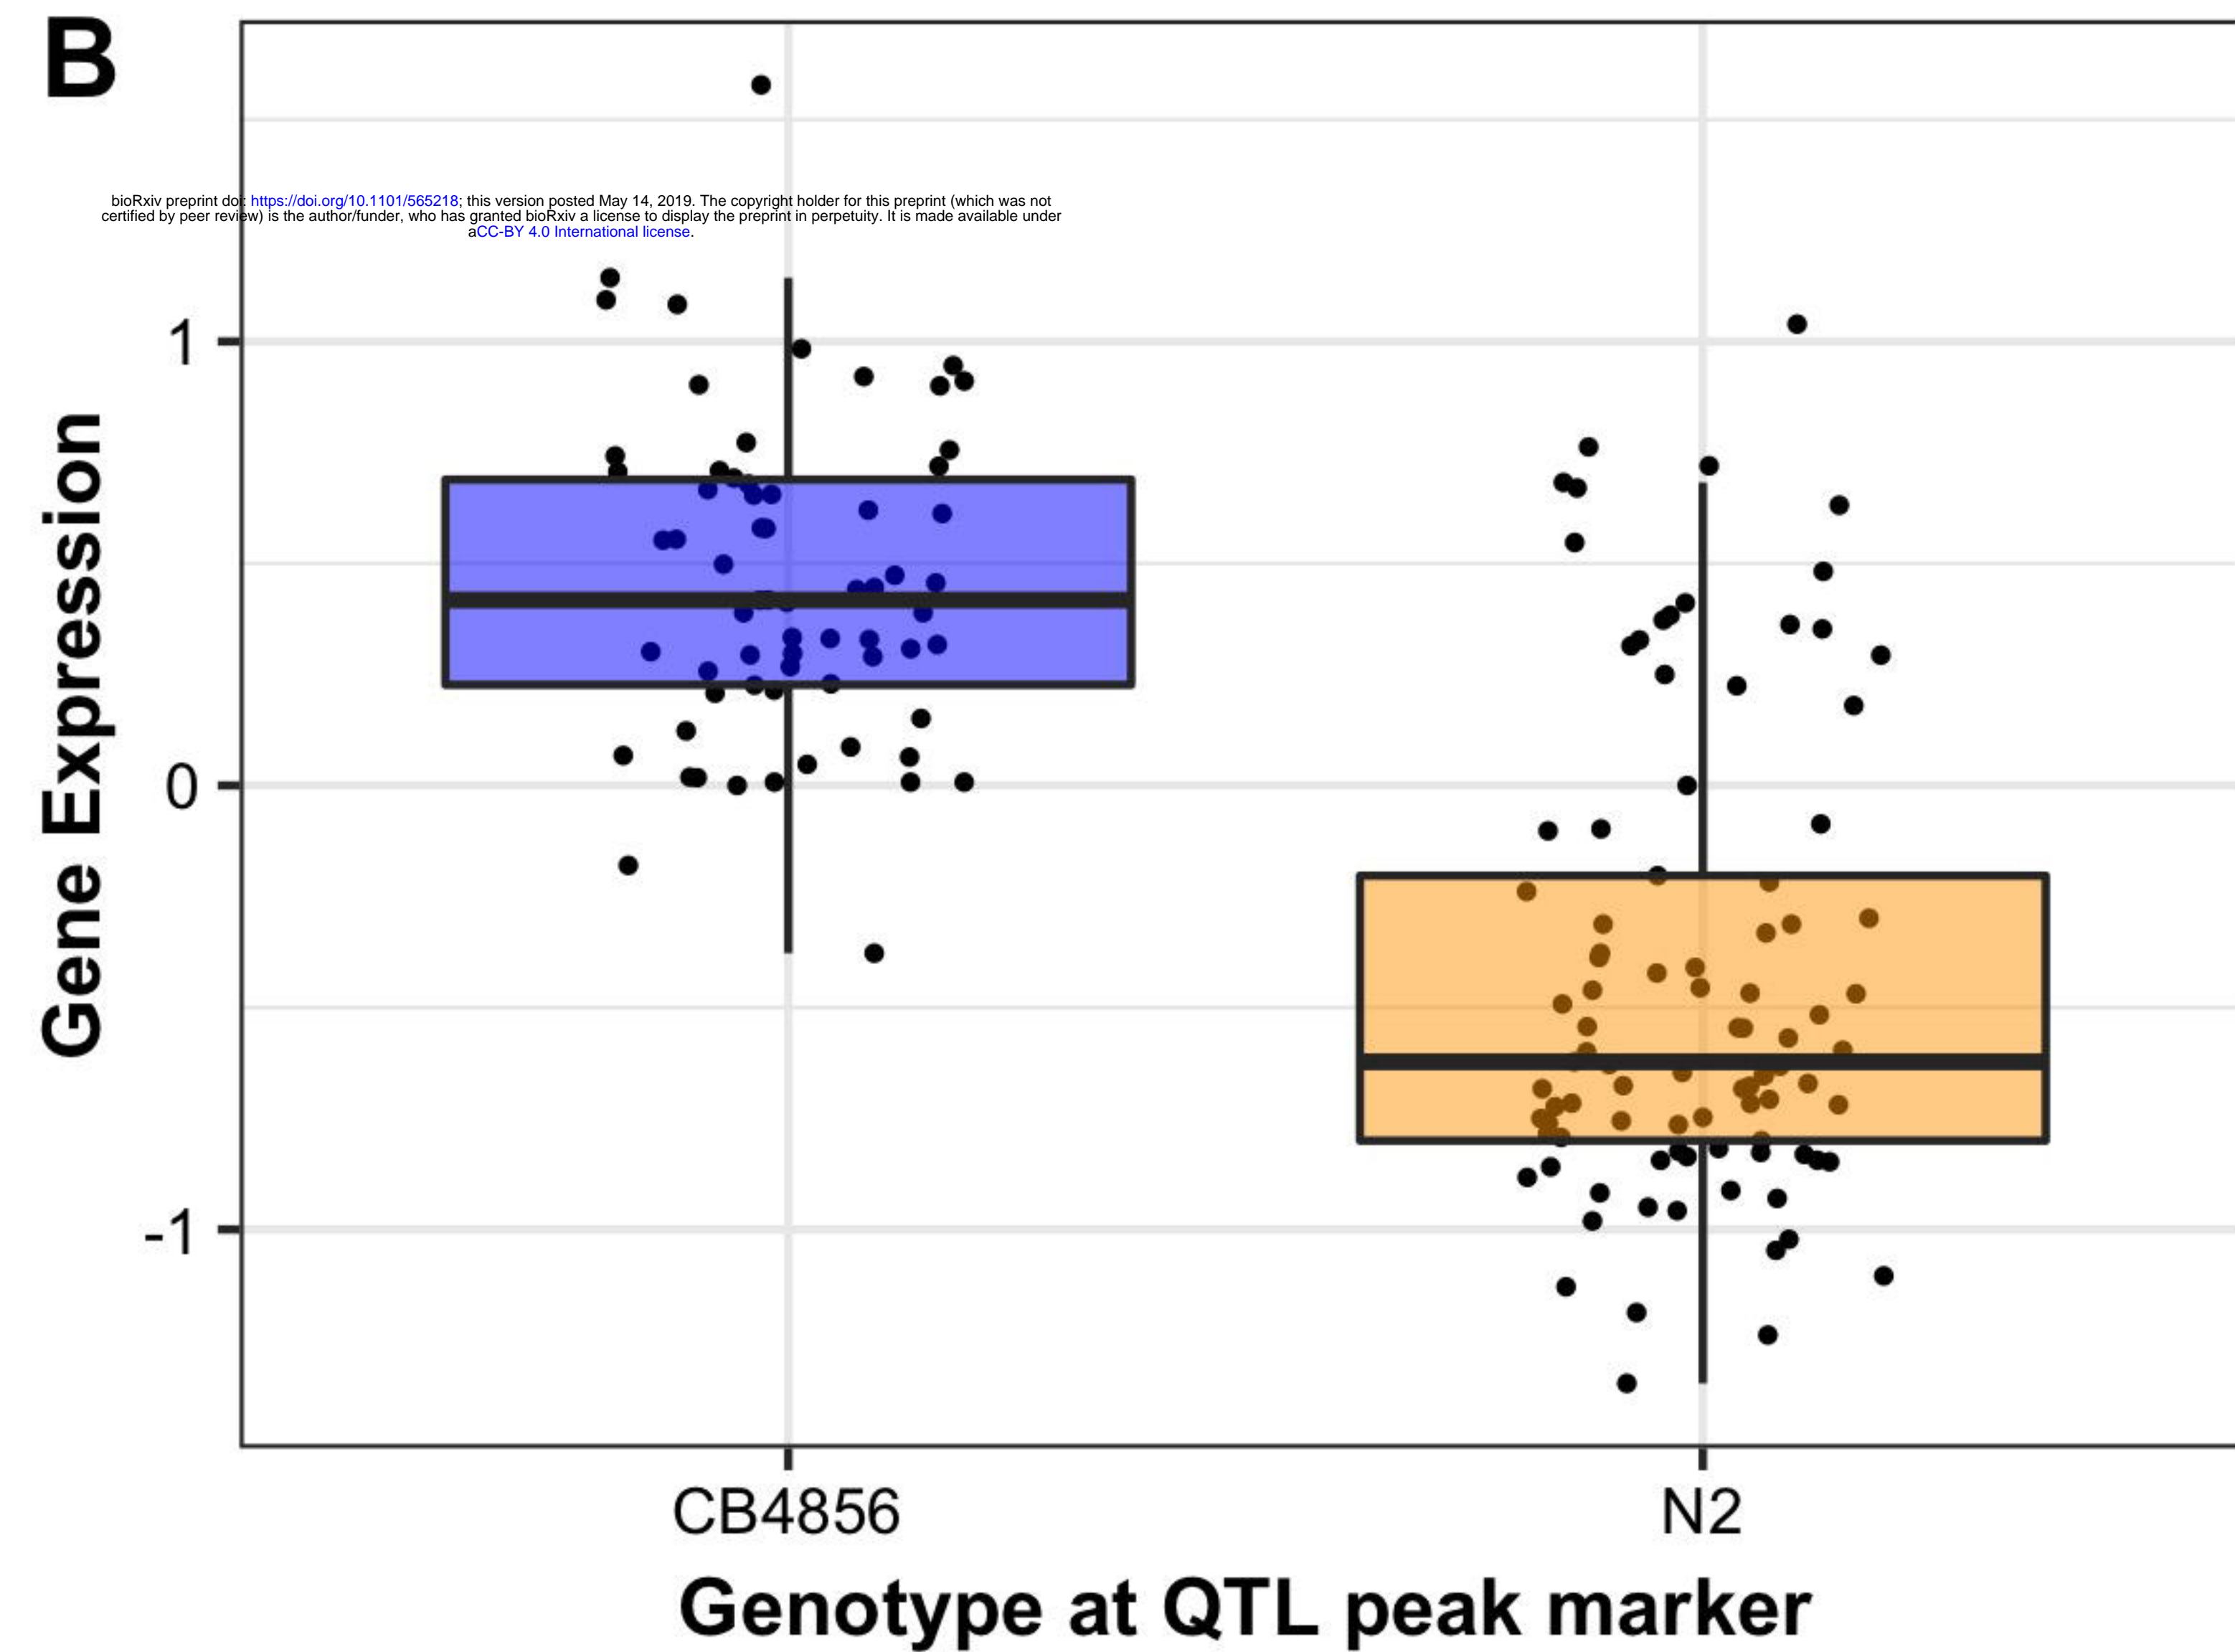**C**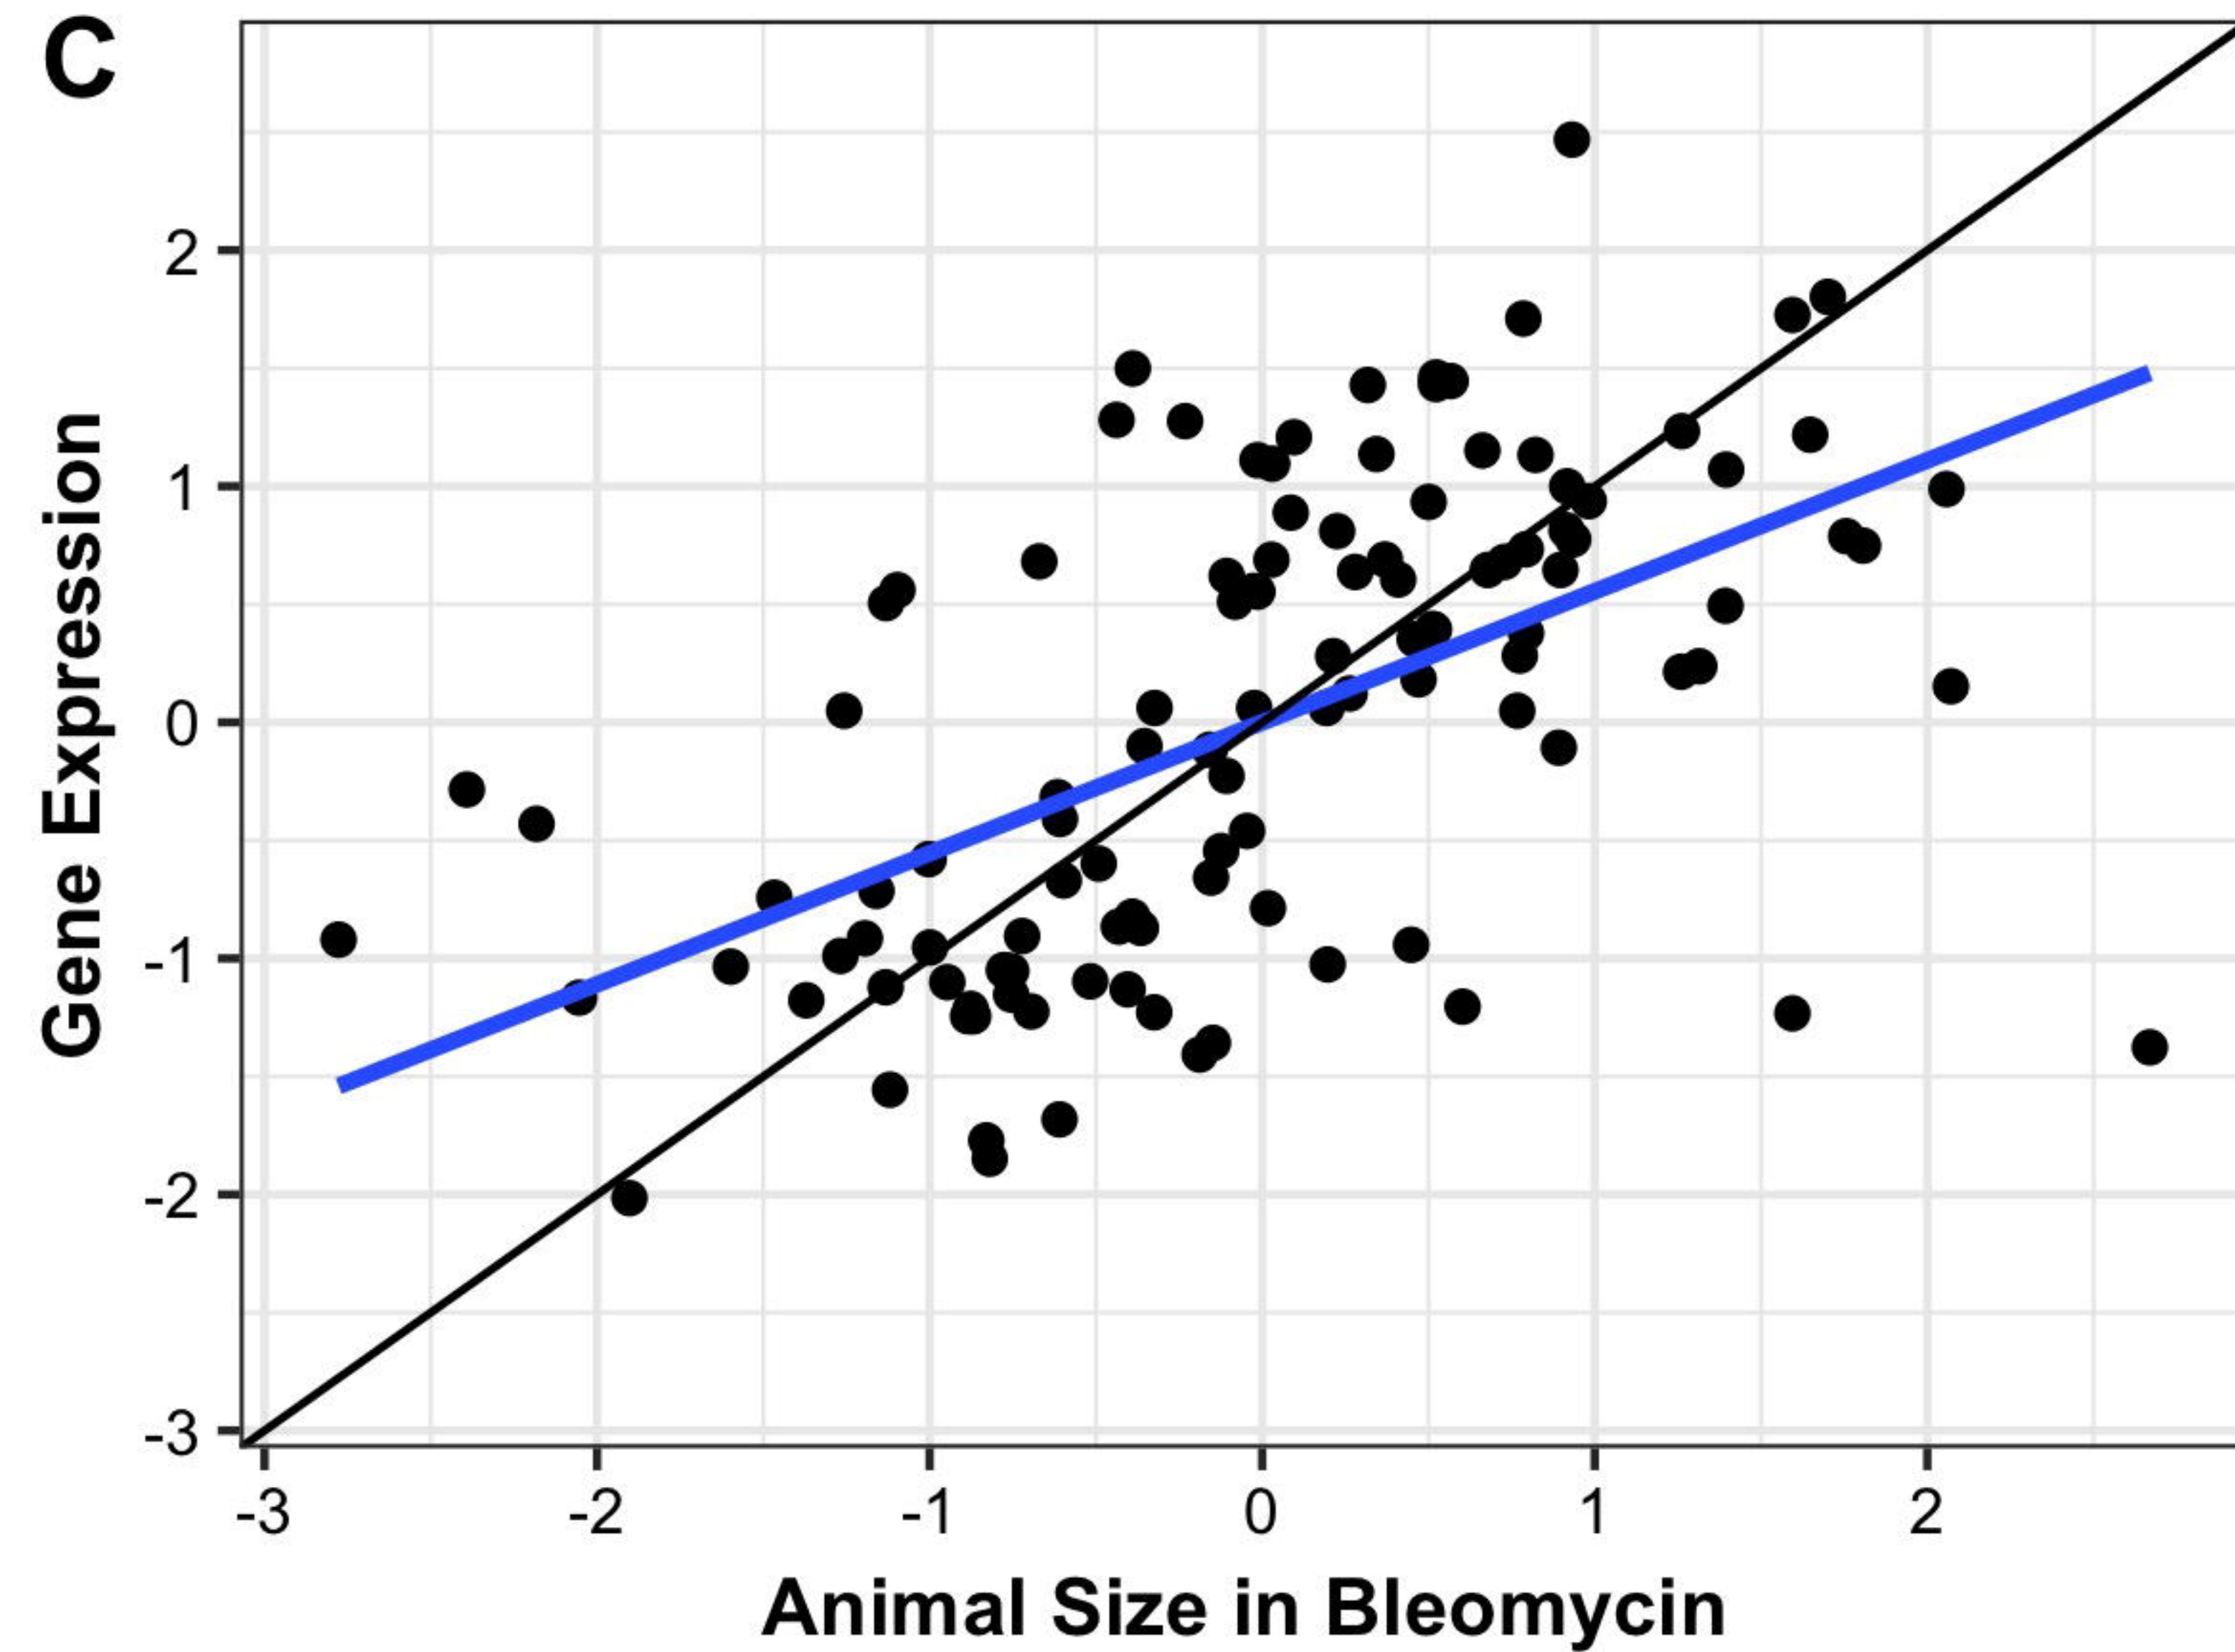



Residual Median Optical Density

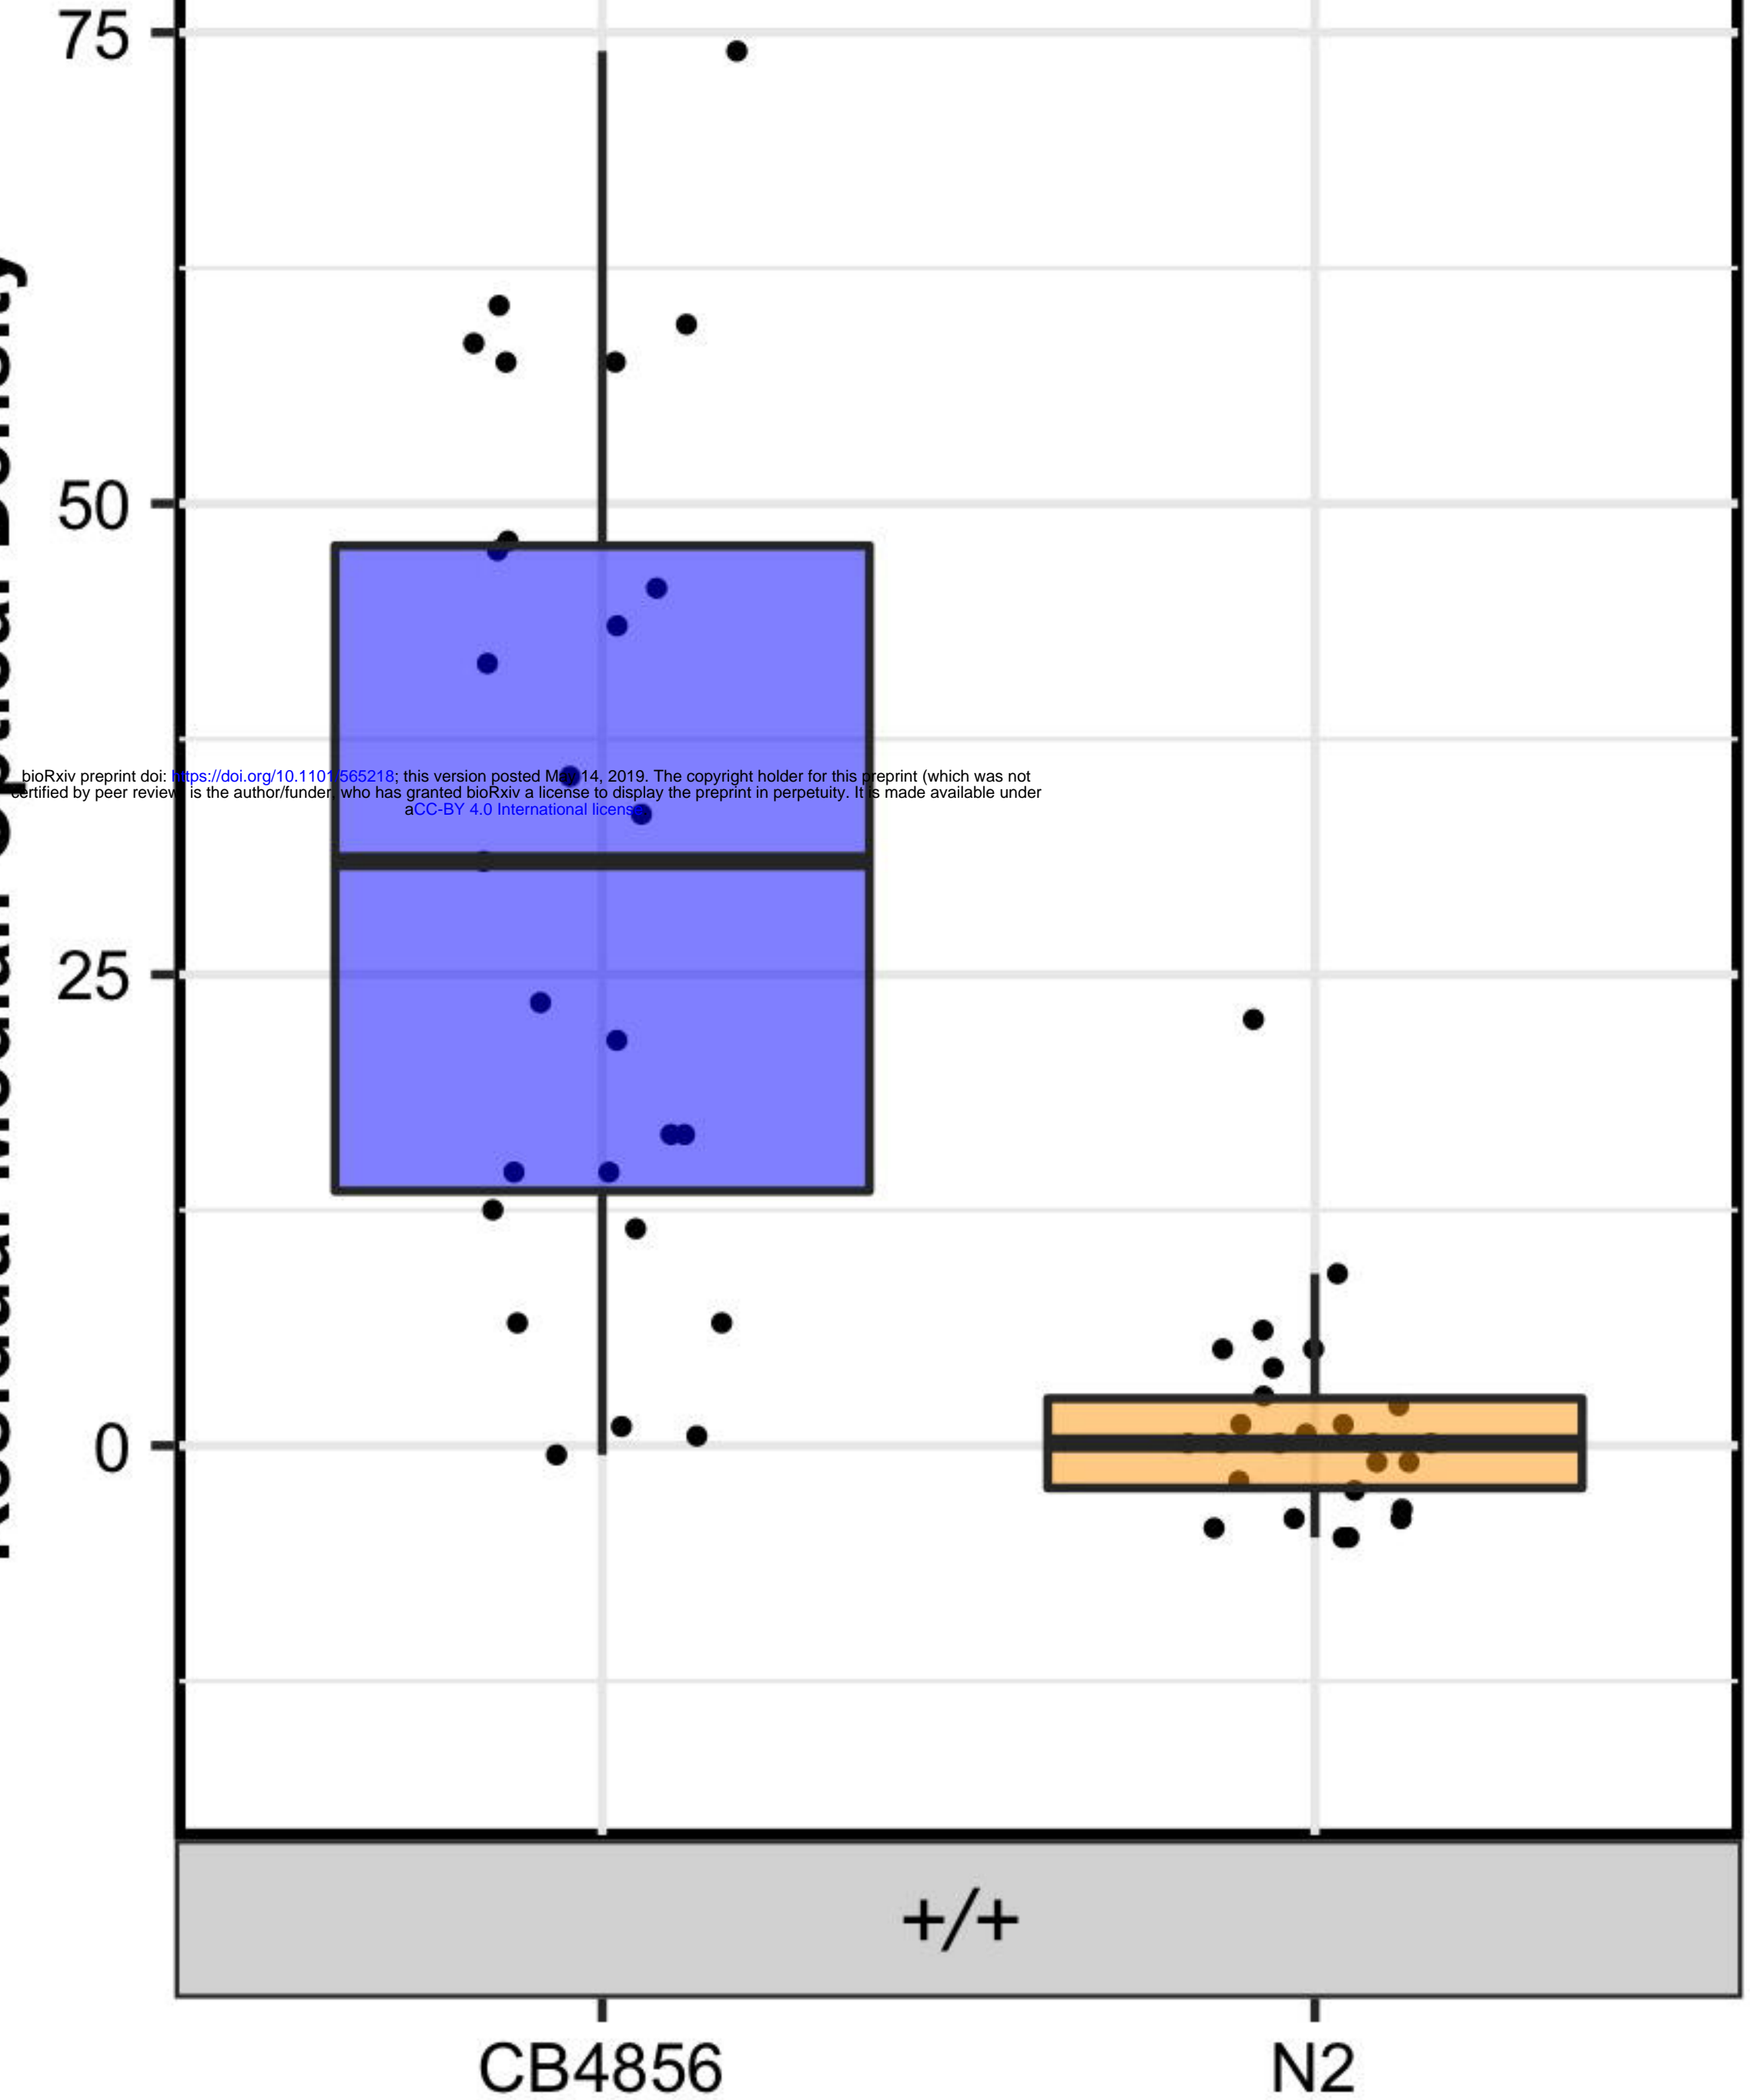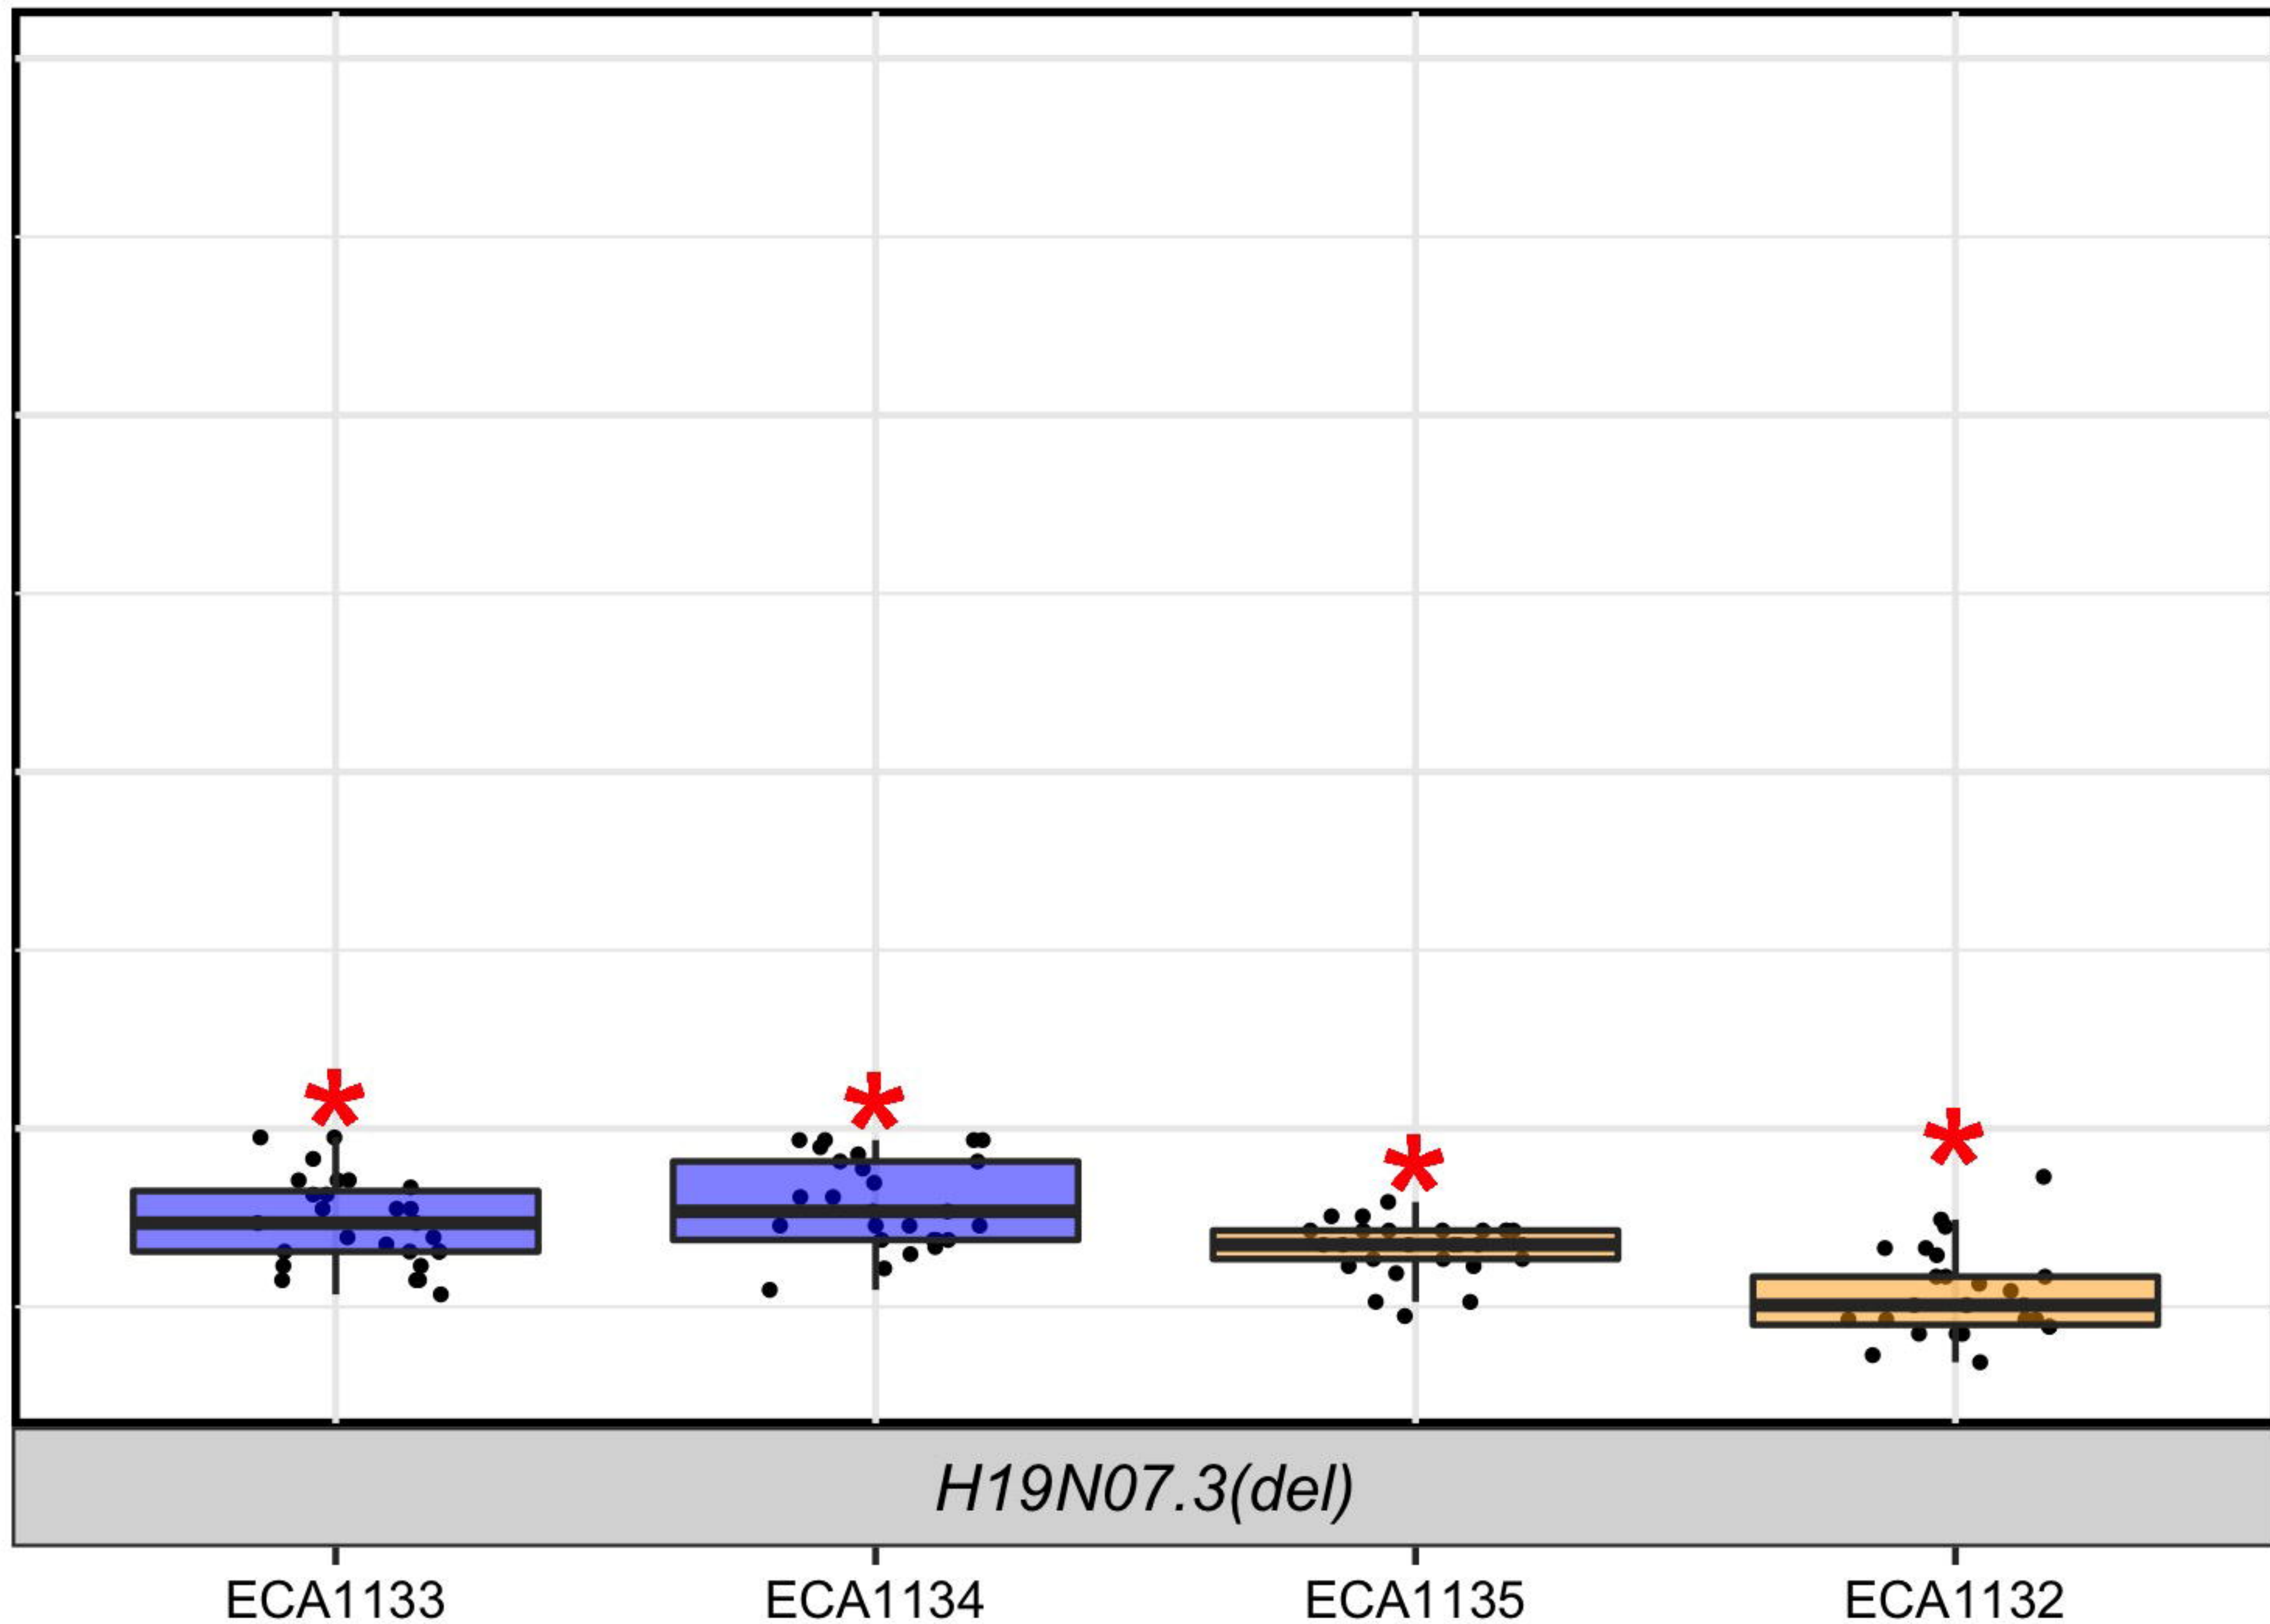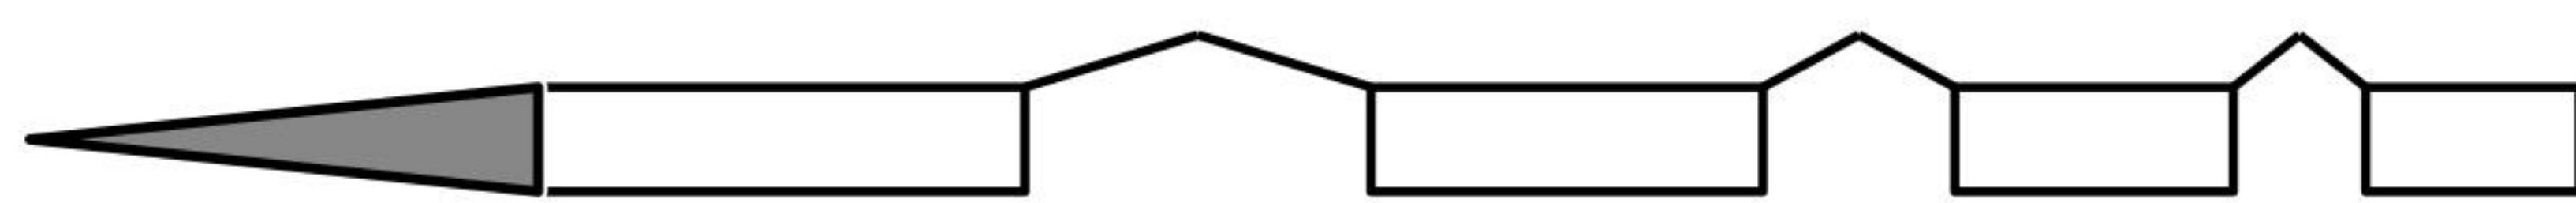

Residual Median Optical Density

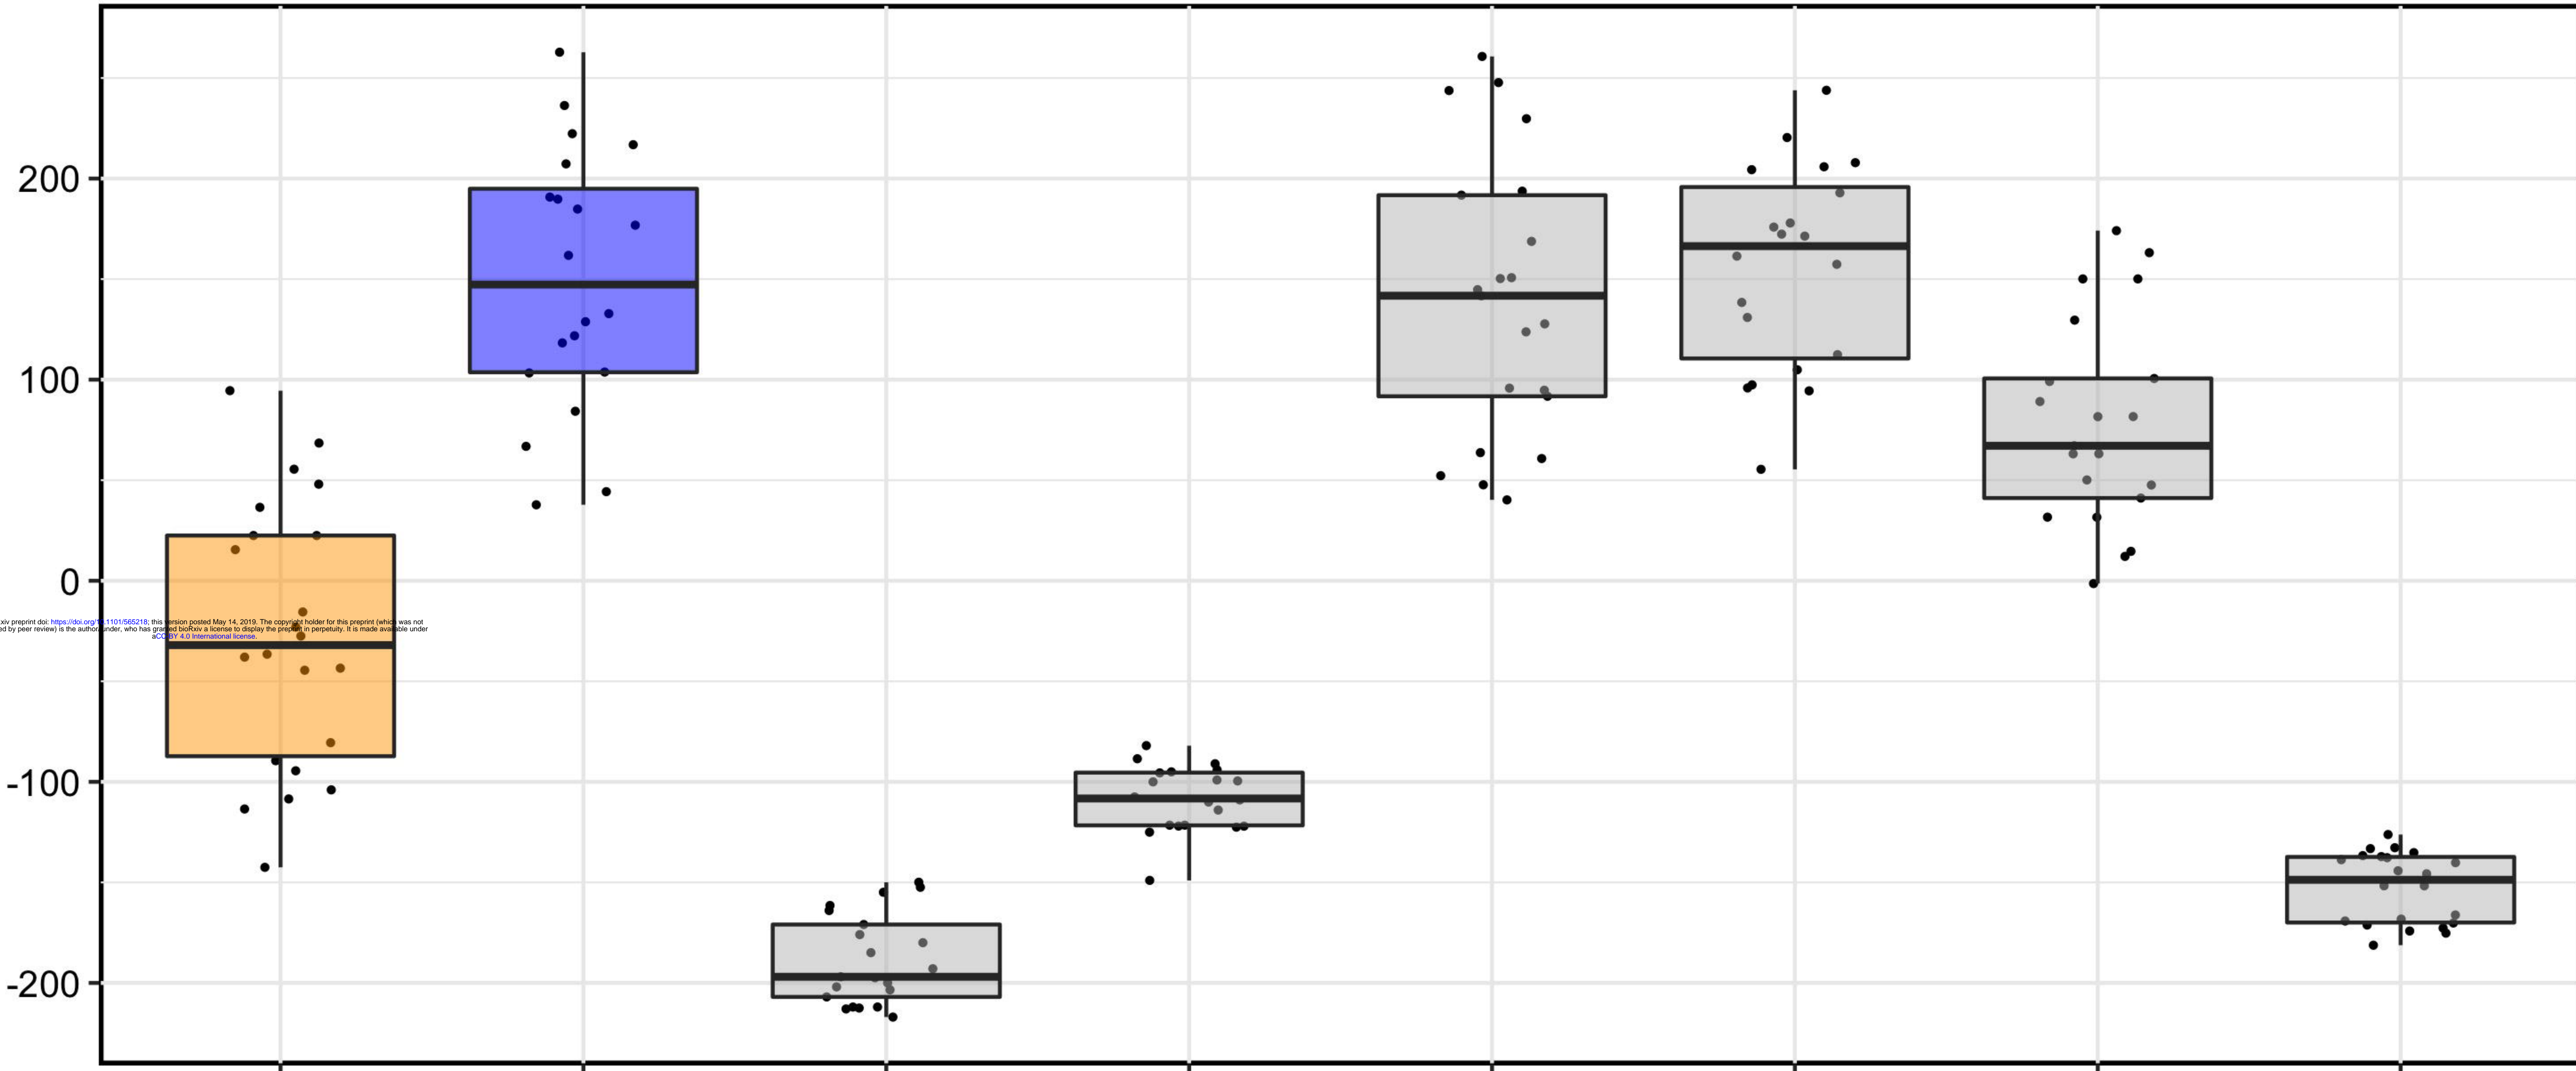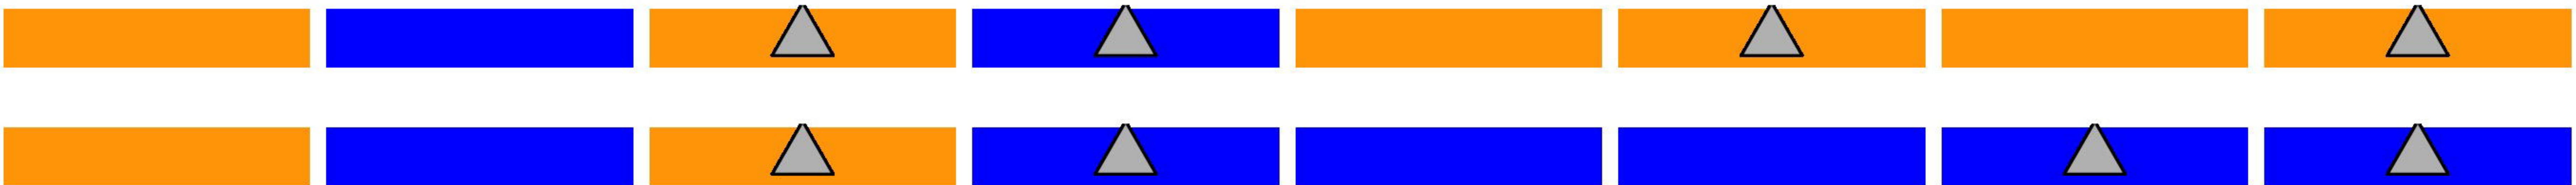



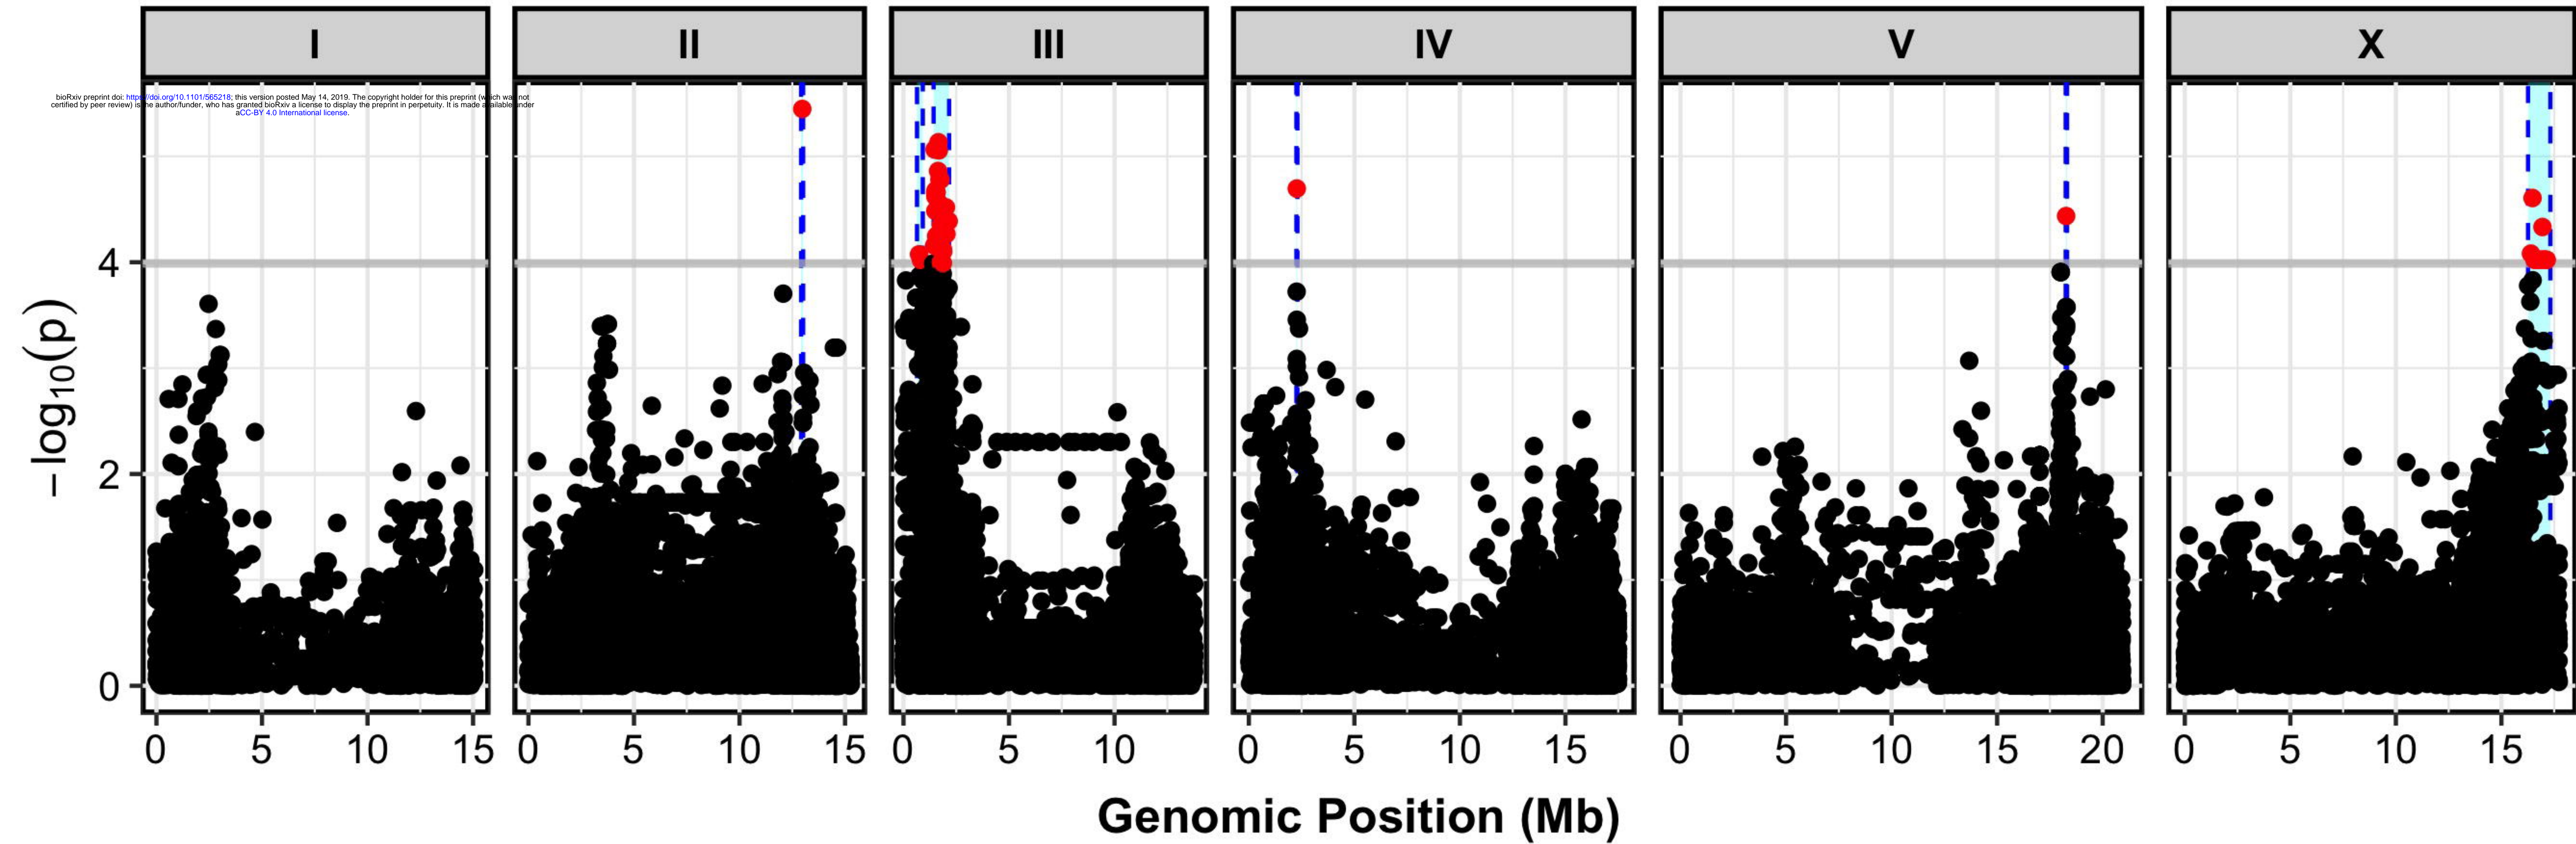

Source: https://www.biorxiv.org/content/10.1101/565218v2.full.pdf
