# Supplementary material for: A nematode-specific gene underlies bleomycin-response variation in Caenorhabditis elegans
Source: bioRxiv preprint, doi:10.1101/565218, version 2 (2019-05-14)
Supplement: File S1 [file 565218_file29.csv]

date	experiment	round	assay	plate	condition	control	strain	row	col	trait	phenotype
20170220	jmjdswap	NA	NA	1	water	None	ECA579	A	11	n	300
20170220	jmjdswap	NA	NA	1	water	None	ECA576	A	6	n	401
20170220	jmjdswap	NA	NA	1	water	None	ECA578	B	10	n	488
20170220	jmjdswap	NA	NA	1	water	None	ECA579	B	11	n	424
20170220	jmjdswap	NA	NA	1	water	None	ECA579	B	12	n	156
20170220	jmjdswap	NA	NA	1	water	None	CB4856	B	4	n	420
20170220	jmjdswap	NA	NA	1	water	None	ECA577	B	7	n	122
20170220	jmjdswap	NA	NA	1	water	None	ECA578	C	10	n	295
20170220	jmjdswap	NA	NA	1	water	None	ECA579	C	12	n	219
20170220	jmjdswap	NA	NA	1	water	None	ECA576	C	6	n	343
20170220	jmjdswap	NA	NA	1	water	None	ECA579	D	12	n	272
20170220	jmjdswap	NA	NA	1	water	None	CB4856	D	3	n	431
20170220	jmjdswap	NA	NA	1	water	None	CB4856	D	4	n	425
20170220	jmjdswap	NA	NA	1	water	None	ECA576	D	5	n	331
20170220	jmjdswap	NA	NA	1	water	None	ECA576	D	6	n	276
20170220	jmjdswap	NA	NA	1	water	None	ECA577	D	7	n	228
20170220	jmjdswap	NA	NA	1	water	None	ECA577	D	8	n	109
20170220	jmjdswap	NA	NA	1	water	None	ECA578	E	10	n	322
20170220	jmjdswap	NA	NA	1	water	None	ECA579	E	11	n	385
20170220	jmjdswap	NA	NA	1	water	None	N2	E	2	n	372
20170220	jmjdswap	NA	NA	1	water	None	ECA577	E	7	n	220
20170220	jmjdswap	NA	NA	1	water	None	ECA578	E	9	n	411
20170220	jmjdswap	NA	NA	1	water	None	ECA576	F	5	n	265
20170220	jmjdswap	NA	NA	1	water	None	ECA578	F	9	n	354
20170220	jmjdswap	NA	NA	1	water	None	ECA578	G	10	n	400
20170220	jmjdswap	NA	NA	1	water	None	ECA579	G	11	n	369
20170220	jmjdswap	NA	NA	1	water	None	CB4856	G	4	n	170
20170220	jmjdswap	NA	NA	1	water	None	ECA577	G	8	n	234
20170220	jmjdswap	NA	NA	1	water	None	ECA578	G	9	n	352
20170220	jmjdswap	NA	NA	1	water	None	ECA579	H	11	n	381
20170220	jmjdswap	NA	NA	1	water	None	ECA577	H	7	n	326
20170220	jmjdswap	NA	NA	2	bleomycin	water	ECA579	A	11	n	91
20170220	jmjdswap	NA	NA	2	bleomycin	water	ECA579	A	12	n	190
20170220	jmjdswap	NA	NA	2	bleomycin	water	CB4856	A	4	n	323
20170220	jmjdswap	NA	NA	2	bleomycin	water	ECA576	A	5	n	174
20170220	jmjdswap	NA	NA	2	bleomycin	water	ECA577	A	7	n	7
20170220	jmjdswap	NA	NA	2	bleomycin	water	ECA577	A	8	n	150
20170220	jmjdswap	NA	NA	2	bleomycin	water	ECA578	A	9	n	271
20170220	jmjdswap	NA	NA	2	bleomycin	water	N2	B	1	n	111
20170220	jmjdswap	NA	NA	2	bleomycin	water	ECA579	B	12	n	162
20170220	jmjdswap	NA	NA	2	bleomycin	water	CB4856	B	3	n	322
20170220	jmjdswap	NA	NA	2	bleomycin	water	CB4856	B	4	n	380
20170220	jmjdswap	NA	NA	2	bleomycin	water	ECA576	B	5	n	80
20170220	jmjdswap	NA	NA	2	bleomycin	water	ECA576	B	6	n	139
20170220	jmjdswap	NA	NA	2	bleomycin	water	ECA577	B	7	n	19
20170220	jmjdswap	NA	NA	2	bleomycin	water	ECA577	B	8	n	163
20170220	jmjdswap	NA	NA	2	bleomycin	water	ECA578	B	9	n	329
20170220	jmjdswap	NA	NA	2	bleomycin	water	N2	C	1	n	126
20170220	jmjdswap	NA	NA	2	bleomycin	water	ECA579	C	11	n	232
20170220	jmjdswap	NA	NA	2	bleomycin	water	ECA579	C	12	n	270
20170220	jmjdswap	NA	NA	2	bleomycin	water	N2	C	2	n	113
20170220	jmjdswap	NA	NA	2	bleomycin	water	ECA577	C	7	n	218
20170220	jmjdswap	NA	NA	2	bleomycin	water	ECA577	C	8	n	171
20170220	jmjdswap	NA	NA	2	bleomycin	water	N2	D	1	n	75
20170220	jmjdswap	NA	NA	2	bleomycin	water	ECA578	D	10	n	104
20170220	jmjdswap	NA	NA	2	bleomycin	water	ECA579	D	11	n	83
20170220	jmjdswap	NA	NA	2	bleomycin	water	N2	D	2	n	146
20170220	jmjdswap	NA	NA	2	bleomycin	water	CB4856	D	3	n	266
20170220	jmjdswap	NA	NA	2	bleomycin	water	CB4856	D	4	n	83
20170220	jmjdswap	NA	NA	2	bleomycin	water	ECA577	D	7	n	180
20170220	jmjdswap	NA	NA	2	bleomycin	water	ECA578	D	9	n	368
20170220	jmjdswap	NA	NA	2	bleomycin	water	N2	E	1	n	105
20170220	jmjdswap	NA	NA	2	bleomycin	water	ECA578	E	10	n	83
20170220	jmjdswap	NA	NA	2	bleomycin	water	ECA579	E	11	n	293
20170220	jmjdswap	NA	NA	2	bleomycin	water	ECA579	E	12	n	298
20170220	jmjdswap	NA	NA	2	bleomycin	water	N2	E	2	n	135
20170220	jmjdswap	NA	NA	2	bleomycin	water	ECA576	E	5	n	183
20170220	jmjdswap	NA	NA	2	bleomycin	water	ECA577	E	7	n	94
20170220	jmjdswap	NA	NA	2	bleomycin	water	ECA578	F	10	n	16
20170220	jmjdswap	NA	NA	2	bleomycin	water	ECA579	F	11	n	185
20170220	jmjdswap	NA	NA	2	bleomycin	water	CB4856	F	3	n	182
20170220	jmjdswap	NA	NA	2	bleomycin	water	ECA576	F	5	n	15
20170220	jmjdswap	NA	NA	2	bleomycin	water	ECA577	F	7	n	116
20170220	jmjdswap	NA	NA	2	bleomycin	water	ECA577	F	8	n	237
20170220	jmjdswap	NA	NA	2	bleomycin	water	ECA578	F	9	n	165
20170220	jmjdswap	NA	NA	2	bleomycin	water	ECA579	G	11	n	91
20170220	jmjdswap	NA	NA	2	bleomycin	water	N2	G	2	n	154
20170220	jmjdswap	NA	NA	2	bleomycin	water	CB4856	G	3	n	106
20170220	jmjdswap	NA	NA	2	bleomycin	water	CB4856	G	4	n	79
20170220	jmjdswap	NA	NA	2	bleomycin	water	ECA576	G	6	n	6
20170220	jmjdswap	NA	NA	2	bleomycin	water	ECA577	G	8	n	14
20170220	jmjdswap	NA	NA	2	bleomycin	water	N2	H	1	n	186
20170220	jmjdswap	NA	NA	2	bleomycin	water	ECA579	H	11	n	37
20170220	jmjdswap	NA	NA	2	bleomycin	water	CB4856	H	3	n	218
20170220	jmjdswap	NA	NA	2	bleomycin	water	ECA576	H	5	n	28
20170220	jmjdswap	NA	NA	2	bleomycin	water	ECA577	H	7	n	158
20170220	jmjdswap	NA	NA	2	bleomycin	water	ECA578	H	9	n	90
20170220	jmjdswap	NA	NA	3	water	None	CB4856	A	4	n	398
20170220	jmjdswap	NA	NA	3	water	None	ECA576	A	5	n	386
20170220	jmjdswap	NA	NA	3	water	None	ECA576	A	6	n	259
20170220	jmjdswap	NA	NA	3	water	None	ECA577	A	8	n	423
20170220	jmjdswap	NA	NA	3	water	None	ECA578	A	9	n	394
20170220	jmjdswap	NA	NA	3	water	None	ECA578	B	10	n	286
20170220	jmjdswap	NA	NA	3	water	None	ECA579	B	11	n	362
20170220	jmjdswap	NA	NA	3	water	None	N2	B	2	n	400
20170220	jmjdswap	NA	NA	3	water	None	CB4856	B	3	n	356
20170220	jmjdswap	NA	NA	3	water	None	ECA577	B	8	n	456
20170220	jmjdswap	NA	NA	3	water	None	N2	C	1	n	337
20170220	jmjdswap	NA	NA	3	water	None	ECA579	C	11	n	391
20170220	jmjdswap	NA	NA	3	water	None	ECA579	C	12	n	372
20170220	jmjdswap	NA	NA	3	water	None	CB4856	C	3	n	369
20170220	jmjdswap	NA	NA	3	water	None	CB4856	C	4	n	460
20170220	jmjdswap	NA	NA	3	water	None	N2	D	1	n	296
20170220	jmjdswap	NA	NA	3	water	None	ECA579	D	11	n	318
20170220	jmjdswap	NA	NA	3	water	None	N2	D	2	n	388
20170220	jmjdswap	NA	NA	3	water	None	CB4856	D	3	n	398
20170220	jmjdswap	NA	NA	3	water	None	ECA576	D	6	n	157
20170220	jmjdswap	NA	NA	3	water	None	ECA577	D	7	n	367
20170220	jmjdswap	NA	NA	3	water	None	ECA578	E	10	n	410
20170220	jmjdswap	NA	NA	3	water	None	ECA579	E	12	n	163
20170220	jmjdswap	NA	NA	3	water	None	ECA576	E	5	n	398
20170220	jmjdswap	NA	NA	3	water	None	ECA577	E	7	n	375
20170220	jmjdswap	NA	NA	3	water	None	ECA578	E	9	n	367
20170220	jmjdswap	NA	NA	3	water	None	N2	F	1	n	376
20170220	jmjdswap	NA	NA	3	water	None	ECA578	F	10	n	378
20170220	jmjdswap	NA	NA	3	water	None	ECA579	F	11	n	351
20170220	jmjdswap	NA	NA	3	water	None	ECA579	F	12	n	205
20170220	jmjdswap	NA	NA	3	water	None	CB4856	F	3	n	384
20170220	jmjdswap	NA	NA	3	water	None	CB4856	F	4	n	373
20170220	jmjdswap	NA	NA	3	water	None	ECA576	F	5	n	262
20170220	jmjdswap	NA	NA	3	water	None	ECA577	F	7	n	336
20170220	jmjdswap	NA	NA	3	water	None	ECA578	F	9	n	359
20170220	jmjdswap	NA	NA	3	water	None	ECA579	G	11	n	311
20170220	jmjdswap	NA	NA	3	water	None	ECA579	G	12	n	357
20170220	jmjdswap	NA	NA	3	water	None	ECA576	G	6	n	361
20170220	jmjdswap	NA	NA	3	water	None	ECA577	G	7	n	347
20170220	jmjdswap	NA	NA	3	water	None	N2	H	1	n	340
20170220	jmjdswap	NA	NA	3	water	None	ECA577	H	7	n	390
20170220	jmjdswap	NA	NA	3	water	None	ECA578	H	9	n	360
20170220	jmjdswap	NA	NA	4	bleomycin	water	ECA579	A	12	n	192
20170220	jmjdswap	NA	NA	4	bleomycin	water	CB4856	A	4	n	157
20170220	jmjdswap	NA	NA	4	bleomycin	water	ECA576	A	5	n	174
20170220	jmjdswap	NA	NA	4	bleomycin	water	ECA576	A	6	n	49
20170220	jmjdswap	NA	NA	4	bleomycin	water	ECA578	A	9	n	324
20170220	jmjdswap	NA	NA	4	bleomycin	water	N2	B	1	n	171
20170220	jmjdswap	NA	NA	4	bleomycin	water	ECA578	B	10	n	182
20170220	jmjdswap	NA	NA	4	bleomycin	water	ECA579	B	11	n	262
20170220	jmjdswap	NA	NA	4	bleomycin	water	N2	B	2	n	106
20170220	jmjdswap	NA	NA	4	bleomycin	water	ECA576	B	5	n	197
20170220	jmjdswap	NA	NA	4	bleomycin	water	ECA577	B	7	n	61
20170220	jmjdswap	NA	NA	4	bleomycin	water	ECA577	B	8	n	107
20170220	jmjdswap	NA	NA	4	bleomycin	water	ECA578	B	9	n	193
20170220	jmjdswap	NA	NA	4	bleomycin	water	ECA578	C	10	n	89
20170220	jmjdswap	NA	NA	4	bleomycin	water	ECA579	C	11	n	264
20170220	jmjdswap	NA	NA	4	bleomycin	water	CB4856	C	3	n	328
20170220	jmjdswap	NA	NA	4	bleomycin	water	ECA576	C	5	n	189
20170220	jmjdswap	NA	NA	4	bleomycin	water	ECA576	C	6	n	202
20170220	jmjdswap	NA	NA	4	bleomycin	water	ECA577	C	8	n	73
20170220	jmjdswap	NA	NA	4	bleomycin	water	ECA578	C	9	n	229
20170220	jmjdswap	NA	NA	4	bleomycin	water	ECA579	D	11	n	229
20170220	jmjdswap	NA	NA	4	bleomycin	water	N2	D	2	n	151
20170220	jmjdswap	NA	NA	4	bleomycin	water	CB4856	D	4	n	263
20170220	jmjdswap	NA	NA	4	bleomycin	water	ECA576	D	6	n	224
20170220	jmjdswap	NA	NA	4	bleomycin	water	ECA577	D	7	n	82
20170220	jmjdswap	NA	NA	4	bleomycin	water	ECA577	D	8	n	100
20170220	jmjdswap	NA	NA	4	bleomycin	water	ECA578	D	9	n	278
20170220	jmjdswap	NA	NA	4	bleomycin	water	ECA578	E	10	n	260
20170220	jmjdswap	NA	NA	4	bleomycin	water	ECA579	E	11	n	154
20170220	jmjdswap	NA	NA	4	bleomycin	water	ECA579	E	12	n	90
20170220	jmjdswap	NA	NA	4	bleomycin	water	N2	E	2	n	102
20170220	jmjdswap	NA	NA	4	bleomycin	water	CB4856	E	4	n	245
20170220	jmjdswap	NA	NA	4	bleomycin	water	ECA576	E	5	n	193
20170220	jmjdswap	NA	NA	4	bleomycin	water	ECA577	E	7	n	118
20170220	jmjdswap	NA	NA	4	bleomycin	water	ECA577	E	8	n	115
20170220	jmjdswap	NA	NA	4	bleomycin	water	ECA578	E	9	n	300
20170220	jmjdswap	NA	NA	4	bleomycin	water	ECA579	F	12	n	250
20170220	jmjdswap	NA	NA	4	bleomycin	water	CB4856	F	3	n	217
20170220	jmjdswap	NA	NA	4	bleomycin	water	CB4856	F	4	n	210
20170220	jmjdswap	NA	NA	4	bleomycin	water	ECA576	F	5	n	172
20170220	jmjdswap	NA	NA	4	bleomycin	water	ECA578	F	9	n	251
20170220	jmjdswap	NA	NA	4	bleomycin	water	N2	G	2	n	104
20170220	jmjdswap	NA	NA	4	bleomycin	water	CB4856	G	3	n	282
20170220	jmjdswap	NA	NA	4	bleomycin	water	ECA576	G	5	n	144
20170220	jmjdswap	NA	NA	4	bleomycin	water	ECA578	G	9	n	228
20170220	jmjdswap	NA	NA	4	bleomycin	water	CB4856	H	3	n	206
20170220	jmjdswap	NA	NA	4	bleomycin	water	ECA576	H	5	n	125
20170220	jmjdswap	NA	NA	4	bleomycin	water	ECA577	H	7	n	171
20170220	jmjdswap	NA	NA	5	water	None	ECA578	A	10	n	428
20170220	jmjdswap	NA	NA	5	water	None	ECA579	A	12	n	313
20170220	jmjdswap	NA	NA	5	water	None	CB4856	A	4	n	430
20170220	jmjdswap	NA	NA	5	water	None	ECA576	A	5	n	391
20170220	jmjdswap	NA	NA	5	water	None	ECA576	A	6	n	419
20170220	jmjdswap	NA	NA	5	water	None	ECA578	A	9	n	333
20170220	jmjdswap	NA	NA	5	water	None	ECA579	B	12	n	449
20170220	jmjdswap	NA	NA	5	water	None	N2	B	2	n	415
20170220	jmjdswap	NA	NA	5	water	None	CB4856	B	3	n	161
20170220	jmjdswap	NA	NA	5	water	None	CB4856	B	4	n	272
20170220	jmjdswap	NA	NA	5	water	None	ECA576	B	5	n	407
20170220	jmjdswap	NA	NA	5	water	None	ECA577	B	7	n	422
20170220	jmjdswap	NA	NA	5	water	None	ECA577	B	8	n	322
20170220	jmjdswap	NA	NA	5	water	None	ECA578	B	9	n	425
20170220	jmjdswap	NA	NA	5	water	None	N2	C	1	n	422
20170220	jmjdswap	NA	NA	5	water	None	ECA578	C	10	n	282
20170220	jmjdswap	NA	NA	5	water	None	ECA579	C	12	n	228
20170220	jmjdswap	NA	NA	5	water	None	CB4856	C	3	n	389
20170220	jmjdswap	NA	NA	5	water	None	CB4856	C	4	n	250
20170220	jmjdswap	NA	NA	5	water	None	ECA576	C	5	n	379
20170220	jmjdswap	NA	NA	5	water	None	ECA577	C	7	n	295
20170220	jmjdswap	NA	NA	5	water	None	ECA577	C	8	n	271
20170220	jmjdswap	NA	NA	5	water	None	ECA578	C	9	n	397
20170220	jmjdswap	NA	NA	5	water	None	N2	D	1	n	416
20170220	jmjdswap	NA	NA	5	water	None	ECA579	D	12	n	382
20170220	jmjdswap	NA	NA	5	water	None	N2	D	2	n	355
20170220	jmjdswap	NA	NA	5	water	None	ECA576	D	5	n	389
20170220	jmjdswap	NA	NA	5	water	None	ECA576	D	6	n	453
20170220	jmjdswap	NA	NA	5	water	None	ECA577	D	7	n	397
20170220	jmjdswap	NA	NA	5	water	None	ECA577	D	8	n	110
20170220	jmjdswap	NA	NA	5	water	None	ECA578	D	9	n	331
20170220	jmjdswap	NA	NA	5	water	None	ECA579	E	12	n	146
20170220	jmjdswap	NA	NA	5	water	None	N2	E	2	n	377
20170220	jmjdswap	NA	NA	5	water	None	CB4856	E	3	n	459
20170220	jmjdswap	NA	NA	5	water	None	CB4856	E	4	n	192
20170220	jmjdswap	NA	NA	5	water	None	ECA576	E	5	n	169
20170220	jmjdswap	NA	NA	5	water	None	ECA577	E	8	n	403
20170220	jmjdswap	NA	NA	5	water	None	ECA578	E	9	n	409
20170220	jmjdswap	NA	NA	5	water	None	ECA579	F	11	n	261
20170220	jmjdswap	NA	NA	5	water	None	ECA579	F	12	n	335
20170220	jmjdswap	NA	NA	5	water	None	N2	F	2	n	373
20170220	jmjdswap	NA	NA	5	water	None	CB4856	F	3	n	135
20170220	jmjdswap	NA	NA	5	water	None	CB4856	F	4	n	185
20170220	jmjdswap	NA	NA	5	water	None	ECA576	F	6	n	374
20170220	jmjdswap	NA	NA	5	water	None	ECA577	F	7	n	377
20170220	jmjdswap	NA	NA	5	water	None	ECA577	F	8	n	349
20170220	jmjdswap	NA	NA	5	water	None	ECA578	F	9	n	353
20170220	jmjdswap	NA	NA	5	water	None	ECA579	G	11	n	378
20170220	jmjdswap	NA	NA	5	water	None	ECA579	G	12	n	382
20170220	jmjdswap	NA	NA	5	water	None	N2	G	2	n	330
20170220	jmjdswap	NA	NA	5	water	None	CB4856	G	3	n	112
20170220	jmjdswap	NA	NA	5	water	None	ECA576	G	5	n	351
20170220	jmjdswap	NA	NA	5	water	None	ECA576	G	6	n	382
20170220	jmjdswap	NA	NA	5	water	None	ECA577	G	8	n	136
20170220	jmjdswap	NA	NA	5	water	None	ECA578	G	9	n	315
20170220	jmjdswap	NA	NA	5	water	None	N2	H	1	n	335
20170220	jmjdswap	NA	NA	5	water	None	CB4856	H	3	n	280
20170220	jmjdswap	NA	NA	6	bleomycin	water	N2	A	1	n	113
20170220	jmjdswap	NA	NA	6	bleomycin	water	ECA578	A	10	n	308
20170220	jmjdswap	NA	NA	6	bleomycin	water	ECA579	A	11	n	256
20170220	jmjdswap	NA	NA	6	bleomycin	water	N2	A	2	n	159
20170220	jmjdswap	NA	NA	6	bleomycin	water	CB4856	A	3	n	270
20170220	jmjdswap	NA	NA	6	bleomycin	water	CB4856	A	4	n	255
20170220	jmjdswap	NA	NA	6	bleomycin	water	ECA576	A	5	n	158
20170220	jmjdswap	NA	NA	6	bleomycin	water	ECA576	A	6	n	192
20170220	jmjdswap	NA	NA	6	bleomycin	water	ECA577	A	7	n	134
20170220	jmjdswap	NA	NA	6	bleomycin	water	ECA577	A	8	n	219
20170220	jmjdswap	NA	NA	6	bleomycin	water	ECA578	A	9	n	211
20170220	jmjdswap	NA	NA	6	bleomycin	water	ECA578	B	10	n	101
20170220	jmjdswap	NA	NA	6	bleomycin	water	ECA579	B	11	n	309
20170220	jmjdswap	NA	NA	6	bleomycin	water	ECA579	B	12	n	208
20170220	jmjdswap	NA	NA	6	bleomycin	water	CB4856	B	3	n	288
20170220	jmjdswap	NA	NA	6	bleomycin	water	ECA576	B	5	n	119
20170220	jmjdswap	NA	NA	6	bleomycin	water	ECA577	B	7	n	134
20170220	jmjdswap	NA	NA	6	bleomycin	water	ECA577	B	8	n	213
20170220	jmjdswap	NA	NA	6	bleomycin	water	ECA578	B	9	n	364
20170220	jmjdswap	NA	NA	6	bleomycin	water	N2	C	1	n	212
20170220	jmjdswap	NA	NA	6	bleomycin	water	ECA578	C	10	n	222
20170220	jmjdswap	NA	NA	6	bleomycin	water	ECA579	C	11	n	258
20170220	jmjdswap	NA	NA	6	bleomycin	water	ECA579	C	12	n	218
20170220	jmjdswap	NA	NA	6	bleomycin	water	N2	C	2	n	159
20170220	jmjdswap	NA	NA	6	bleomycin	water	CB4856	C	4	n	175
20170220	jmjdswap	NA	NA	6	bleomycin	water	ECA577	C	8	n	114
20170220	jmjdswap	NA	NA	6	bleomycin	water	ECA578	C	9	n	201
20170220	jmjdswap	NA	NA	6	bleomycin	water	N2	D	1	n	38
20170220	jmjdswap	NA	NA	6	bleomycin	water	ECA578	D	10	n	308
20170220	jmjdswap	NA	NA	6	bleomycin	water	ECA579	D	11	n	314
20170220	jmjdswap	NA	NA	6	bleomycin	water	ECA579	D	12	n	151
20170220	jmjdswap	NA	NA	6	bleomycin	water	N2	D	2	n	115
20170220	jmjdswap	NA	NA	6	bleomycin	water	CB4856	D	3	n	285
20170220	jmjdswap	NA	NA	6	bleomycin	water	ECA576	D	5	n	135
20170220	jmjdswap	NA	NA	6	bleomycin	water	ECA577	D	7	n	189
20170220	jmjdswap	NA	NA	6	bleomycin	water	ECA577	D	8	n	189
20170220	jmjdswap	NA	NA	6	bleomycin	water	ECA578	D	9	n	101
20170220	jmjdswap	NA	NA	6	bleomycin	water	N2	E	1	n	114
20170220	jmjdswap	NA	NA	6	bleomycin	water	ECA579	E	11	n	75
20170220	jmjdswap	NA	NA	6	bleomycin	water	CB4856	E	3	n	191
20170220	jmjdswap	NA	NA	6	bleomycin	water	CB4856	E	4	n	88
20170220	jmjdswap	NA	NA	6	bleomycin	water	ECA576	E	5	n	61
20170220	jmjdswap	NA	NA	6	bleomycin	water	ECA577	E	7	n	102
20170220	jmjdswap	NA	NA	6	bleomycin	water	ECA577	E	8	n	53
20170220	jmjdswap	NA	NA	6	bleomycin	water	ECA578	E	9	n	248
20170220	jmjdswap	NA	NA	6	bleomycin	water	N2	F	1	n	206
20170220	jmjdswap	NA	NA	6	bleomycin	water	ECA578	F	10	n	111
20170220	jmjdswap	NA	NA	6	bleomycin	water	ECA579	F	11	n	133
20170220	jmjdswap	NA	NA	6	bleomycin	water	N2	F	2	n	172
20170220	jmjdswap	NA	NA	6	bleomycin	water	CB4856	F	3	n	265
20170220	jmjdswap	NA	NA	6	bleomycin	water	CB4856	F	4	n	132
20170220	jmjdswap	NA	NA	6	bleomycin	water	ECA576	F	5	n	116
20170220	jmjdswap	NA	NA	6	bleomycin	water	ECA577	F	7	n	44
20170220	jmjdswap	NA	NA	6	bleomycin	water	ECA577	F	8	n	102
20170220	jmjdswap	NA	NA	6	bleomycin	water	ECA578	F	9	n	228
20170220	jmjdswap	NA	NA	6	bleomycin	water	N2	G	2	n	80
20170220	jmjdswap	NA	NA	6	bleomycin	water	CB4856	G	3	n	281
20170220	jmjdswap	NA	NA	6	bleomycin	water	ECA576	G	5	n	110
20170220	jmjdswap	NA	NA	6	bleomycin	water	ECA576	G	6	n	190
20170220	jmjdswap	NA	NA	6	bleomycin	water	ECA577	G	8	n	29
20170220	jmjdswap	NA	NA	6	bleomycin	water	ECA578	G	9	n	43
20170220	jmjdswap	NA	NA	6	bleomycin	water	N2	H	1	n	143
20170220	jmjdswap	NA	NA	6	bleomycin	water	ECA579	H	11	n	58
20170220	jmjdswap	NA	NA	6	bleomycin	water	ECA576	H	5	n	67
20170220	jmjdswap	NA	NA	6	bleomycin	water	ECA577	H	7	n	151
20170220	jmjdswap	NA	NA	1	water	None	ECA579	A	11	mean.TOF	215.826666666667
20170220	jmjdswap	NA	NA	1	water	None	ECA576	A	6	mean.TOF	225.002493765586
20170220	jmjdswap	NA	NA	1	water	None	ECA579	B	11	mean.TOF	216.599056603774
20170220	jmjdswap	NA	NA	1	water	None	CB4856	B	4	mean.TOF	241.316666666667
20170220	jmjdswap	NA	NA	1	water	None	ECA577	B	7	mean.TOF	233.844262295082
20170220	jmjdswap	NA	NA	1	water	None	ECA578	C	10	mean.TOF	237.528813559322
20170220	jmjdswap	NA	NA	1	water	None	ECA579	C	12	mean.TOF	255.068493150685
20170220	jmjdswap	NA	NA	1	water	None	ECA576	C	6	mean.TOF	216.081632653061
20170220	jmjdswap	NA	NA	1	water	None	ECA579	D	12	mean.TOF	236.522058823529
20170220	jmjdswap	NA	NA	1	water	None	CB4856	D	3	mean.TOF	233.92343387471
20170220	jmjdswap	NA	NA	1	water	None	CB4856	D	4	mean.TOF	225.456470588235
20170220	jmjdswap	NA	NA	1	water	None	ECA576	D	5	mean.TOF	209.078549848943
20170220	jmjdswap	NA	NA	1	water	None	ECA576	D	6	mean.TOF	241.365942028986
20170220	jmjdswap	NA	NA	1	water	None	ECA577	D	7	mean.TOF	221.267543859649
20170220	jmjdswap	NA	NA	1	water	None	ECA577	D	8	mean.TOF	239.954128440367
20170220	jmjdswap	NA	NA	1	water	None	ECA578	D	9	mean.TOF	226.262068965517
20170220	jmjdswap	NA	NA	1	water	None	ECA578	E	10	mean.TOF	231.791925465839
20170220	jmjdswap	NA	NA	1	water	None	ECA579	E	11	mean.TOF	237.05974025974
20170220	jmjdswap	NA	NA	1	water	None	N2	E	2	mean.TOF	222.115591397849
20170220	jmjdswap	NA	NA	1	water	None	ECA577	E	7	mean.TOF	242.890909090909
20170220	jmjdswap	NA	NA	1	water	None	ECA578	E	9	mean.TOF	233.625304136253
20170220	jmjdswap	NA	NA	1	water	None	ECA576	F	5	mean.TOF	229.784905660377
20170220	jmjdswap	NA	NA	1	water	None	ECA578	F	9	mean.TOF	248.200564971751
20170220	jmjdswap	NA	NA	1	water	None	ECA578	G	10	mean.TOF	227.605
20170220	jmjdswap	NA	NA	1	water	None	ECA579	G	11	mean.TOF	221.086720867209
20170220	jmjdswap	NA	NA	1	water	None	CB4856	G	4	mean.TOF	230.588235294118
20170220	jmjdswap	NA	NA	1	water	None	ECA576	G	5	mean.TOF	253.287356321839
20170220	jmjdswap	NA	NA	1	water	None	ECA576	G	6	mean.TOF	238.952830188679
20170220	jmjdswap	NA	NA	1	water	None	ECA577	G	8	mean.TOF	232.995726495727
20170220	jmjdswap	NA	NA	1	water	None	ECA578	G	9	mean.TOF	237.071022727273
20170220	jmjdswap	NA	NA	1	water	None	ECA579	H	11	mean.TOF	238.9343832021
20170220	jmjdswap	NA	NA	1	water	None	ECA577	H	7	mean.TOF	232.766871165644
20170220	jmjdswap	NA	NA	2	bleomycin	water	ECA579	A	11	mean.TOF	142.527472527473
20170220	jmjdswap	NA	NA	2	bleomycin	water	ECA579	A	12	mean.TOF	140.515789473684
20170220	jmjdswap	NA	NA	2	bleomycin	water	CB4856	A	4	mean.TOF	141.356037151703
20170220	jmjdswap	NA	NA	2	bleomycin	water	ECA576	A	5	mean.TOF	117.293103448276
20170220	jmjdswap	NA	NA	2	bleomycin	water	ECA577	A	7	mean.TOF	109.428571428571
20170220	jmjdswap	NA	NA	2	bleomycin	water	ECA577	A	8	mean.TOF	124.486666666667
20170220	jmjdswap	NA	NA	2	bleomycin	water	ECA578	A	9	mean.TOF	136.007380073801
20170220	jmjdswap	NA	NA	2	bleomycin	water	N2	B	1	mean.TOF	119.36036036036
20170220	jmjdswap	NA	NA	2	bleomycin	water	ECA579	B	12	mean.TOF	140.925925925926
20170220	jmjdswap	NA	NA	2	bleomycin	water	CB4856	B	3	mean.TOF	151.400621118012
20170220	jmjdswap	NA	NA	2	bleomycin	water	ECA576	B	5	mean.TOF	118.9125
20170220	jmjdswap	NA	NA	2	bleomycin	water	ECA576	B	6	mean.TOF	126.726618705036
20170220	jmjdswap	NA	NA	2	bleomycin	water	ECA577	B	7	mean.TOF	114.315789473684
20170220	jmjdswap	NA	NA	2	bleomycin	water	ECA577	B	8	mean.TOF	128.171779141104
20170220	jmjdswap	NA	NA	2	bleomycin	water	ECA578	B	9	mean.TOF	138.899696048632
20170220	jmjdswap	NA	NA	2	bleomycin	water	N2	C	1	mean.TOF	121.833333333333
20170220	jmjdswap	NA	NA	2	bleomycin	water	ECA579	C	11	mean.TOF	155.969827586207
20170220	jmjdswap	NA	NA	2	bleomycin	water	ECA579	C	12	mean.TOF	149.8
20170220	jmjdswap	NA	NA	2	bleomycin	water	N2	C	2	mean.TOF	141.858407079646
20170220	jmjdswap	NA	NA	2	bleomycin	water	ECA576	C	5	mean.TOF	135.732394366197
20170220	jmjdswap	NA	NA	2	bleomycin	water	ECA577	C	7	mean.TOF	120.871559633028
20170220	jmjdswap	NA	NA	2	bleomycin	water	ECA577	C	8	mean.TOF	129
20170220	jmjdswap	NA	NA	2	bleomycin	water	N2	D	1	mean.TOF	119.48
20170220	jmjdswap	NA	NA	2	bleomycin	water	ECA578	D	10	mean.TOF	119.855769230769
20170220	jmjdswap	NA	NA	2	bleomycin	water	ECA579	D	11	mean.TOF	138.89156626506
20170220	jmjdswap	NA	NA	2	bleomycin	water	N2	D	2	mean.TOF	131.013698630137
20170220	jmjdswap	NA	NA	2	bleomycin	water	CB4856	D	3	mean.TOF	137.007518796992
20170220	jmjdswap	NA	NA	2	bleomycin	water	CB4856	D	4	mean.TOF	121.313253012048
20170220	jmjdswap	NA	NA	2	bleomycin	water	ECA577	D	7	mean.TOF	125.222222222222
20170220	jmjdswap	NA	NA	2	bleomycin	water	ECA578	D	9	mean.TOF	149.836956521739
20170220	jmjdswap	NA	NA	2	bleomycin	water	N2	E	1	mean.TOF	112.495238095238
20170220	jmjdswap	NA	NA	2	bleomycin	water	ECA578	E	10	mean.TOF	144.240963855422
20170220	jmjdswap	NA	NA	2	bleomycin	water	ECA579	E	11	mean.TOF	160.447098976109
20170220	jmjdswap	NA	NA	2	bleomycin	water	ECA579	E	12	mean.TOF	150.157718120805
20170220	jmjdswap	NA	NA	2	bleomycin	water	N2	E	2	mean.TOF	117.474074074074
20170220	jmjdswap	NA	NA	2	bleomycin	water	ECA577	E	7	mean.TOF	128.978723404255
20170220	jmjdswap	NA	NA	2	bleomycin	water	ECA579	F	11	mean.TOF	146.454054054054
20170220	jmjdswap	NA	NA	2	bleomycin	water	CB4856	F	3	mean.TOF	149.247252747253
20170220	jmjdswap	NA	NA	2	bleomycin	water	ECA576	F	5	mean.TOF	128.6
20170220	jmjdswap	NA	NA	2	bleomycin	water	ECA577	F	7	mean.TOF	113.5
20170220	jmjdswap	NA	NA	2	bleomycin	water	ECA577	F	8	mean.TOF	135.101265822785
20170220	jmjdswap	NA	NA	2	bleomycin	water	ECA578	F	9	mean.TOF	148.927272727273
20170220	jmjdswap	NA	NA	2	bleomycin	water	ECA579	G	11	mean.TOF	124.461538461538
20170220	jmjdswap	NA	NA	2	bleomycin	water	N2	G	2	mean.TOF	121.62987012987
20170220	jmjdswap	NA	NA	2	bleomycin	water	CB4856	G	3	mean.TOF	146.132075471698
20170220	jmjdswap	NA	NA	2	bleomycin	water	CB4856	G	4	mean.TOF	128.088607594937
20170220	jmjdswap	NA	NA	2	bleomycin	water	ECA576	G	6	mean.TOF	116
20170220	jmjdswap	NA	NA	2	bleomycin	water	ECA577	G	8	mean.TOF	119.071428571429
20170220	jmjdswap	NA	NA	2	bleomycin	water	N2	H	1	mean.TOF	127.704301075269
20170220	jmjdswap	NA	NA	2	bleomycin	water	CB4856	H	3	mean.TOF	143.463302752294
20170220	jmjdswap	NA	NA	2	bleomycin	water	ECA576	H	5	mean.TOF	116.5
20170220	jmjdswap	NA	NA	2	bleomycin	water	ECA577	H	7	mean.TOF	131.962025316456
20170220	jmjdswap	NA	NA	2	bleomycin	water	ECA578	H	9	mean.TOF	133.577777777778
20170220	jmjdswap	NA	NA	3	water	None	CB4856	A	4	mean.TOF	240.374371859296
20170220	jmjdswap	NA	NA	3	water	None	ECA576	A	5	mean.TOF	232.448186528497
20170220	jmjdswap	NA	NA	3	water	None	ECA576	A	6	mean.TOF	228.876447876448
20170220	jmjdswap	NA	NA	3	water	None	ECA577	A	8	mean.TOF	217.243498817967
20170220	jmjdswap	NA	NA	3	water	None	ECA578	A	9	mean.TOF	258.180203045685
20170220	jmjdswap	NA	NA	3	water	None	ECA578	B	10	mean.TOF	253.094405594406
20170220	jmjdswap	NA	NA	3	water	None	ECA579	B	11	mean.TOF	252.455801104972
20170220	jmjdswap	NA	NA	3	water	None	N2	B	2	mean.TOF	227.04
20170220	jmjdswap	NA	NA	3	water	None	CB4856	B	3	mean.TOF	246.755617977528
20170220	jmjdswap	NA	NA	3	water	None	ECA577	B	8	mean.TOF	221.293859649123
20170220	jmjdswap	NA	NA	3	water	None	N2	C	1	mean.TOF	240.804154302671
20170220	jmjdswap	NA	NA	3	water	None	ECA579	C	11	mean.TOF	247.347826086957
20170220	jmjdswap	NA	NA	3	water	None	ECA579	C	12	mean.TOF	241.478494623656
20170220	jmjdswap	NA	NA	3	water	None	CB4856	C	3	mean.TOF	249.528455284553
20170220	jmjdswap	NA	NA	3	water	None	CB4856	C	4	mean.TOF	243.821739130435
20170220	jmjdswap	NA	NA	3	water	None	N2	D	1	mean.TOF	245.97972972973
20170220	jmjdswap	NA	NA	3	water	None	ECA579	D	11	mean.TOF	243.345911949686
20170220	jmjdswap	NA	NA	3	water	None	N2	D	2	mean.TOF	229.417525773196
20170220	jmjdswap	NA	NA	3	water	None	CB4856	D	3	mean.TOF	241.572864321608
20170220	jmjdswap	NA	NA	3	water	None	ECA577	D	7	mean.TOF	232.99727520436
20170220	jmjdswap	NA	NA	3	water	None	ECA578	E	10	mean.TOF	242.119512195122
20170220	jmjdswap	NA	NA	3	water	None	ECA579	E	12	mean.TOF	264.018404907975
20170220	jmjdswap	NA	NA	3	water	None	ECA576	E	5	mean.TOF	231.8391959799
20170220	jmjdswap	NA	NA	3	water	None	ECA577	E	7	mean.TOF	230.272
20170220	jmjdswap	NA	NA	3	water	None	ECA578	E	9	mean.TOF	242.74931880109
20170220	jmjdswap	NA	NA	3	water	None	N2	F	1	mean.TOF	233.303191489362
20170220	jmjdswap	NA	NA	3	water	None	ECA578	F	10	mean.TOF	239.478835978836
20170220	jmjdswap	NA	NA	3	water	None	ECA579	F	11	mean.TOF	271.783475783476
20170220	jmjdswap	NA	NA	3	water	None	ECA579	F	12	mean.TOF	259.692682926829
20170220	jmjdswap	NA	NA	3	water	None	CB4856	F	3	mean.TOF	242.0390625
20170220	jmjdswap	NA	NA	3	water	None	CB4856	F	4	mean.TOF	242.209115281501
20170220	jmjdswap	NA	NA	3	water	None	ECA576	F	5	mean.TOF	251.049618320611
20170220	jmjdswap	NA	NA	3	water	None	ECA577	F	7	mean.TOF	229.58630952381
20170220	jmjdswap	NA	NA	3	water	None	ECA578	F	9	mean.TOF	248.629526462396
20170220	jmjdswap	NA	NA	3	water	None	ECA579	G	11	mean.TOF	264.810289389068
20170220	jmjdswap	NA	NA	3	water	None	ECA579	G	12	mean.TOF	261.641456582633
20170220	jmjdswap	NA	NA	3	water	None	ECA576	G	6	mean.TOF	231.684210526316
20170220	jmjdswap	NA	NA	3	water	None	ECA577	G	7	mean.TOF	227.853025936599
20170220	jmjdswap	NA	NA	3	water	None	N2	H	1	mean.TOF	228.205882352941
20170220	jmjdswap	NA	NA	3	water	None	ECA577	H	7	mean.TOF	231.587179487179
20170220	jmjdswap	NA	NA	3	water	None	ECA578	H	9	mean.TOF	241.141666666667
20170220	jmjdswap	NA	NA	4	bleomycin	water	ECA579	A	12	mean.TOF	122.791666666667
20170220	jmjdswap	NA	NA	4	bleomycin	water	CB4856	A	4	mean.TOF	120.445859872611
20170220	jmjdswap	NA	NA	4	bleomycin	water	ECA576	A	5	mean.TOF	123.258620689655
20170220	jmjdswap	NA	NA	4	bleomycin	water	ECA576	A	6	mean.TOF	117.285714285714
20170220	jmjdswap	NA	NA	4	bleomycin	water	ECA578	A	9	mean.TOF	122.432098765432
20170220	jmjdswap	NA	NA	4	bleomycin	water	ECA578	B	10	mean.TOF	114.598901098901
20170220	jmjdswap	NA	NA	4	bleomycin	water	ECA579	B	11	mean.TOF	117.381679389313
20170220	jmjdswap	NA	NA	4	bleomycin	water	N2	B	2	mean.TOF	116.943396226415
20170220	jmjdswap	NA	NA	4	bleomycin	water	CB4856	B	4	mean.TOF	110.178571428571
20170220	jmjdswap	NA	NA	4	bleomycin	water	ECA576	B	5	mean.TOF	123.045685279188
20170220	jmjdswap	NA	NA	4	bleomycin	water	ECA577	B	8	mean.TOF	106.878504672897
20170220	jmjdswap	NA	NA	4	bleomycin	water	ECA578	B	9	mean.TOF	124.19689119171
20170220	jmjdswap	NA	NA	4	bleomycin	water	ECA578	C	10	mean.TOF	121.52808988764
20170220	jmjdswap	NA	NA	4	bleomycin	water	ECA579	C	11	mean.TOF	124.568181818182
20170220	jmjdswap	NA	NA	4	bleomycin	water	CB4856	C	3	mean.TOF	123.756097560976
20170220	jmjdswap	NA	NA	4	bleomycin	water	ECA576	C	5	mean.TOF	122.222222222222
20170220	jmjdswap	NA	NA	4	bleomycin	water	ECA576	C	6	mean.TOF	115.292079207921
20170220	jmjdswap	NA	NA	4	bleomycin	water	ECA577	C	8	mean.TOF	119.712328767123
20170220	jmjdswap	NA	NA	4	bleomycin	water	ECA578	C	9	mean.TOF	135.292576419214
20170220	jmjdswap	NA	NA	4	bleomycin	water	ECA579	D	11	mean.TOF	127.659388646288
20170220	jmjdswap	NA	NA	4	bleomycin	water	N2	D	2	mean.TOF	107.331125827815
20170220	jmjdswap	NA	NA	4	bleomycin	water	CB4856	D	4	mean.TOF	125.022813688213
20170220	jmjdswap	NA	NA	4	bleomycin	water	ECA576	D	6	mean.TOF	121.816964285714
20170220	jmjdswap	NA	NA	4	bleomycin	water	ECA577	D	7	mean.TOF	127.59756097561
20170220	jmjdswap	NA	NA	4	bleomycin	water	ECA577	D	8	mean.TOF	119.59
20170220	jmjdswap	NA	NA	4	bleomycin	water	ECA578	D	9	mean.TOF	120.618705035971
20170220	jmjdswap	NA	NA	4	bleomycin	water	ECA578	E	10	mean.TOF	123.523076923077
20170220	jmjdswap	NA	NA	4	bleomycin	water	ECA579	E	11	mean.TOF	126.058441558442
20170220	jmjdswap	NA	NA	4	bleomycin	water	ECA579	E	12	mean.TOF	123.611111111111
20170220	jmjdswap	NA	NA	4	bleomycin	water	N2	E	2	mean.TOF	110.950980392157
20170220	jmjdswap	NA	NA	4	bleomycin	water	CB4856	E	4	mean.TOF	133.359183673469
20170220	jmjdswap	NA	NA	4	bleomycin	water	ECA576	E	5	mean.TOF	118.487046632124
20170220	jmjdswap	NA	NA	4	bleomycin	water	ECA577	E	7	mean.TOF	111.601694915254
20170220	jmjdswap	NA	NA	4	bleomycin	water	ECA577	E	8	mean.TOF	108.417391304348
20170220	jmjdswap	NA	NA	4	bleomycin	water	ECA578	E	9	mean.TOF	127.88
20170220	jmjdswap	NA	NA	4	bleomycin	water	ECA579	F	12	mean.TOF	134.04
20170220	jmjdswap	NA	NA	4	bleomycin	water	CB4856	F	3	mean.TOF	128.294930875576
20170220	jmjdswap	NA	NA	4	bleomycin	water	CB4856	F	4	mean.TOF	129.090476190476
20170220	jmjdswap	NA	NA	4	bleomycin	water	ECA576	F	5	mean.TOF	120.5
20170220	jmjdswap	NA	NA	4	bleomycin	water	ECA578	F	9	mean.TOF	135.143426294821
20170220	jmjdswap	NA	NA	4	bleomycin	water	N2	G	2	mean.TOF	128.528846153846
20170220	jmjdswap	NA	NA	4	bleomycin	water	CB4856	G	3	mean.TOF	133.578014184397
20170220	jmjdswap	NA	NA	4	bleomycin	water	ECA576	G	5	mean.TOF	117.041666666667
20170220	jmjdswap	NA	NA	4	bleomycin	water	ECA578	G	9	mean.TOF	115.671052631579
20170220	jmjdswap	NA	NA	4	bleomycin	water	CB4856	H	3	mean.TOF	114.398058252427
20170220	jmjdswap	NA	NA	4	bleomycin	water	ECA576	H	5	mean.TOF	120.576
20170220	jmjdswap	NA	NA	4	bleomycin	water	ECA577	H	7	mean.TOF	122.970760233918
20170220	jmjdswap	NA	NA	5	water	None	ECA578	A	10	mean.TOF	244.058411214953
20170220	jmjdswap	NA	NA	5	water	None	ECA579	A	12	mean.TOF	263.584664536741
20170220	jmjdswap	NA	NA	5	water	None	CB4856	A	4	mean.TOF	269.993023255814
20170220	jmjdswap	NA	NA	5	water	None	ECA576	A	5	mean.TOF	235.120204603581
20170220	jmjdswap	NA	NA	5	water	None	ECA576	A	6	mean.TOF	229.298329355609
20170220	jmjdswap	NA	NA	5	water	None	ECA578	A	9	mean.TOF	245.141141141141
20170220	jmjdswap	NA	NA	5	water	None	ECA579	B	12	mean.TOF	233.770601336303
20170220	jmjdswap	NA	NA	5	water	None	N2	B	2	mean.TOF	250.831325301205
20170220	jmjdswap	NA	NA	5	water	None	CB4856	B	3	mean.TOF	232.993788819876
20170220	jmjdswap	NA	NA	5	water	None	CB4856	B	4	mean.TOF	257.676470588235
20170220	jmjdswap	NA	NA	5	water	None	ECA576	B	5	mean.TOF	230.884520884521
20170220	jmjdswap	NA	NA	5	water	None	ECA577	B	7	mean.TOF	220.13981042654
20170220	jmjdswap	NA	NA	5	water	None	ECA577	B	8	mean.TOF	236.763975155279
20170220	jmjdswap	NA	NA	5	water	None	ECA578	B	9	mean.TOF	238.755294117647
20170220	jmjdswap	NA	NA	5	water	None	N2	C	1	mean.TOF	236.317535545024
20170220	jmjdswap	NA	NA	5	water	None	ECA578	C	10	mean.TOF	244.804964539007
20170220	jmjdswap	NA	NA	5	water	None	ECA579	C	12	mean.TOF	237.75
20170220	jmjdswap	NA	NA	5	water	None	CB4856	C	3	mean.TOF	258.210796915167
20170220	jmjdswap	NA	NA	5	water	None	CB4856	C	4	mean.TOF	272.648
20170220	jmjdswap	NA	NA	5	water	None	ECA576	C	5	mean.TOF	227.883905013193
20170220	jmjdswap	NA	NA	5	water	None	ECA577	C	7	mean.TOF	225.071186440678
20170220	jmjdswap	NA	NA	5	water	None	ECA577	C	8	mean.TOF	224.30258302583
20170220	jmjdswap	NA	NA	5	water	None	ECA578	C	9	mean.TOF	249.75314861461
20170220	jmjdswap	NA	NA	5	water	None	N2	D	1	mean.TOF	222.350961538462
20170220	jmjdswap	NA	NA	5	water	None	ECA579	D	12	mean.TOF	234.910994764398
20170220	jmjdswap	NA	NA	5	water	None	N2	D	2	mean.TOF	245.991549295775
20170220	jmjdswap	NA	NA	5	water	None	ECA576	D	5	mean.TOF	226.424164524422
20170220	jmjdswap	NA	NA	5	water	None	ECA576	D	6	mean.TOF	224.649006622517
20170220	jmjdswap	NA	NA	5	water	None	ECA577	D	7	mean.TOF	231.428211586902
20170220	jmjdswap	NA	NA	5	water	None	ECA577	D	8	mean.TOF	235.190909090909
20170220	jmjdswap	NA	NA	5	water	None	ECA578	D	9	mean.TOF	249.413897280967
20170220	jmjdswap	NA	NA	5	water	None	ECA579	E	12	mean.TOF	235.671232876712
20170220	jmjdswap	NA	NA	5	water	None	N2	E	2	mean.TOF	239.713527851459
20170220	jmjdswap	NA	NA	5	water	None	CB4856	E	3	mean.TOF	235.043572984749
20170220	jmjdswap	NA	NA	5	water	None	ECA576	E	5	mean.TOF	242.556213017751
20170220	jmjdswap	NA	NA	5	water	None	ECA577	E	8	mean.TOF	226.565756823821
20170220	jmjdswap	NA	NA	5	water	None	ECA578	E	9	mean.TOF	237.689486552567
20170220	jmjdswap	NA	NA	5	water	None	ECA579	F	11	mean.TOF	247.095785440613
20170220	jmjdswap	NA	NA	5	water	None	ECA579	F	12	mean.TOF	226.874626865672
20170220	jmjdswap	NA	NA	5	water	None	N2	F	2	mean.TOF	230.584450402145
20170220	jmjdswap	NA	NA	5	water	None	CB4856	F	3	mean.TOF	260.985185185185
20170220	jmjdswap	NA	NA	5	water	None	CB4856	F	4	mean.TOF	244.508108108108
20170220	jmjdswap	NA	NA	5	water	None	ECA576	F	6	mean.TOF	237.435828877005
20170220	jmjdswap	NA	NA	5	water	None	ECA577	F	7	mean.TOF	232.755968169761
20170220	jmjdswap	NA	NA	5	water	None	ECA577	F	8	mean.TOF	217.389684813754
20170220	jmjdswap	NA	NA	5	water	None	ECA578	F	9	mean.TOF	233.957507082153
20170220	jmjdswap	NA	NA	5	water	None	ECA578	G	10	mean.TOF	231.611764705882
20170220	jmjdswap	NA	NA	5	water	None	ECA579	G	11	mean.TOF	245.116402116402
20170220	jmjdswap	NA	NA	5	water	None	ECA579	G	12	mean.TOF	224.767015706806
20170220	jmjdswap	NA	NA	5	water	None	N2	G	2	mean.TOF	233.351515151515
20170220	jmjdswap	NA	NA	5	water	None	CB4856	G	3	mean.TOF	269.044642857143
20170220	jmjdswap	NA	NA	5	water	None	ECA576	G	5	mean.TOF	219.689458689459
20170220	jmjdswap	NA	NA	5	water	None	ECA576	G	6	mean.TOF	232.735602094241
20170220	jmjdswap	NA	NA	5	water	None	ECA577	G	8	mean.TOF	235.139705882353
20170220	jmjdswap	NA	NA	5	water	None	ECA578	G	9	mean.TOF	251.644444444444
20170220	jmjdswap	NA	NA	5	water	None	N2	H	1	mean.TOF	229.271641791045
20170220	jmjdswap	NA	NA	5	water	None	CB4856	H	3	mean.TOF	247.864285714286
20170220	jmjdswap	NA	NA	6	bleomycin	water	N2	A	1	mean.TOF	125.017699115044
20170220	jmjdswap	NA	NA	6	bleomycin	water	ECA578	A	10	mean.TOF	144.428571428571
20170220	jmjdswap	NA	NA	6	bleomycin	water	ECA579	A	11	mean.TOF	135.82421875
20170220	jmjdswap	NA	NA	6	bleomycin	water	N2	A	2	mean.TOF	129.289308176101
20170220	jmjdswap	NA	NA	6	bleomycin	water	CB4856	A	3	mean.TOF	142.351851851852
20170220	jmjdswap	NA	NA	6	bleomycin	water	CB4856	A	4	mean.TOF	136.270588235294
20170220	jmjdswap	NA	NA	6	bleomycin	water	ECA576	A	5	mean.TOF	128.696202531646
20170220	jmjdswap	NA	NA	6	bleomycin	water	ECA576	A	6	mean.TOF	130.953125
20170220	jmjdswap	NA	NA	6	bleomycin	water	ECA577	A	7	mean.TOF	129.89552238806
20170220	jmjdswap	NA	NA	6	bleomycin	water	ECA577	A	8	mean.TOF	128.374429223744
20170220	jmjdswap	NA	NA	6	bleomycin	water	ECA578	A	9	mean.TOF	151.203791469194
20170220	jmjdswap	NA	NA	6	bleomycin	water	ECA578	B	10	mean.TOF	135.910891089109
20170220	jmjdswap	NA	NA	6	bleomycin	water	ECA579	B	11	mean.TOF	143.906148867314
20170220	jmjdswap	NA	NA	6	bleomycin	water	ECA579	B	12	mean.TOF	130.370192307692
20170220	jmjdswap	NA	NA	6	bleomycin	water	CB4856	B	3	mean.TOF	135.486111111111
20170220	jmjdswap	NA	NA	6	bleomycin	water	ECA576	B	5	mean.TOF	116.126050420168
20170220	jmjdswap	NA	NA	6	bleomycin	water	ECA577	B	7	mean.TOF	116.320895522388
20170220	jmjdswap	NA	NA	6	bleomycin	water	ECA577	B	8	mean.TOF	125.676056338028
20170220	jmjdswap	NA	NA	6	bleomycin	water	ECA578	B	9	mean.TOF	145.60989010989
20170220	jmjdswap	NA	NA	6	bleomycin	water	N2	C	1	mean.TOF	125.514150943396
20170220	jmjdswap	NA	NA	6	bleomycin	water	ECA578	C	10	mean.TOF	150.306306306306
20170220	jmjdswap	NA	NA	6	bleomycin	water	ECA579	C	11	mean.TOF	152.302325581395
20170220	jmjdswap	NA	NA	6	bleomycin	water	ECA579	C	12	mean.TOF	134.963302752294
20170220	jmjdswap	NA	NA	6	bleomycin	water	N2	C	2	mean.TOF	116.308176100629
20170220	jmjdswap	NA	NA	6	bleomycin	water	CB4856	C	4	mean.TOF	139.662857142857
20170220	jmjdswap	NA	NA	6	bleomycin	water	ECA577	C	8	mean.TOF	115.69298245614
20170220	jmjdswap	NA	NA	6	bleomycin	water	ECA578	C	9	mean.TOF	142.457711442786
20170220	jmjdswap	NA	NA	6	bleomycin	water	N2	D	1	mean.TOF	126.315789473684
20170220	jmjdswap	NA	NA	6	bleomycin	water	ECA578	D	10	mean.TOF	153.590909090909
20170220	jmjdswap	NA	NA	6	bleomycin	water	ECA579	D	11	mean.TOF	142.484076433121
20170220	jmjdswap	NA	NA	6	bleomycin	water	ECA579	D	12	mean.TOF	134.920529801325
20170220	jmjdswap	NA	NA	6	bleomycin	water	N2	D	2	mean.TOF	116.591304347826
20170220	jmjdswap	NA	NA	6	bleomycin	water	CB4856	D	3	mean.TOF	134.884210526316
20170220	jmjdswap	NA	NA	6	bleomycin	water	ECA576	D	5	mean.TOF	130.4
20170220	jmjdswap	NA	NA	6	bleomycin	water	ECA577	D	7	mean.TOF	134.57671957672
20170220	jmjdswap	NA	NA	6	bleomycin	water	ECA577	D	8	mean.TOF	124.724867724868
20170220	jmjdswap	NA	NA	6	bleomycin	water	ECA578	D	9	mean.TOF	144.247524752475
20170220	jmjdswap	NA	NA	6	bleomycin	water	N2	E	1	mean.TOF	116.061403508772
20170220	jmjdswap	NA	NA	6	bleomycin	water	ECA579	E	11	mean.TOF	160.52
20170220	jmjdswap	NA	NA	6	bleomycin	water	CB4856	E	3	mean.TOF	131.219895287958
20170220	jmjdswap	NA	NA	6	bleomycin	water	CB4856	E	4	mean.TOF	112.488636363636
20170220	jmjdswap	NA	NA	6	bleomycin	water	ECA576	E	5	mean.TOF	125.409836065574
20170220	jmjdswap	NA	NA	6	bleomycin	water	ECA577	E	7	mean.TOF	126.647058823529
20170220	jmjdswap	NA	NA	6	bleomycin	water	ECA577	E	8	mean.TOF	120.849056603774
20170220	jmjdswap	NA	NA	6	bleomycin	water	ECA578	E	9	mean.TOF	147.084677419355
20170220	jmjdswap	NA	NA	6	bleomycin	water	N2	F	1	mean.TOF	131.223300970874
20170220	jmjdswap	NA	NA	6	bleomycin	water	ECA578	F	10	mean.TOF	136.387387387387
20170220	jmjdswap	NA	NA	6	bleomycin	water	ECA579	F	11	mean.TOF	143.443609022556
20170220	jmjdswap	NA	NA	6	bleomycin	water	N2	F	2	mean.TOF	133.354651162791
20170220	jmjdswap	NA	NA	6	bleomycin	water	CB4856	F	3	mean.TOF	140.22641509434
20170220	jmjdswap	NA	NA	6	bleomycin	water	CB4856	F	4	mean.TOF	136.287878787879
20170220	jmjdswap	NA	NA	6	bleomycin	water	ECA576	F	5	mean.TOF	119.956896551724
20170220	jmjdswap	NA	NA	6	bleomycin	water	ECA577	F	7	mean.TOF	102.931818181818
20170220	jmjdswap	NA	NA	6	bleomycin	water	ECA577	F	8	mean.TOF	139.607843137255
20170220	jmjdswap	NA	NA	6	bleomycin	water	ECA578	F	9	mean.TOF	147.355263157895
20170220	jmjdswap	NA	NA	6	bleomycin	water	N2	G	1	mean.TOF	138.666666666667
20170220	jmjdswap	NA	NA	6	bleomycin	water	N2	G	2	mean.TOF	128.3375
20170220	jmjdswap	NA	NA	6	bleomycin	water	CB4856	G	3	mean.TOF	128.227758007117
20170220	jmjdswap	NA	NA	6	bleomycin	water	ECA576	G	5	mean.TOF	122.163636363636
20170220	jmjdswap	NA	NA	6	bleomycin	water	ECA576	G	6	mean.TOF	130.247368421053
20170220	jmjdswap	NA	NA	6	bleomycin	water	ECA577	G	8	mean.TOF	107.862068965517
20170220	jmjdswap	NA	NA	6	bleomycin	water	ECA578	G	9	mean.TOF	132.511627906977
20170220	jmjdswap	NA	NA	6	bleomycin	water	N2	H	1	mean.TOF	111.258741258741
20170220	jmjdswap	NA	NA	6	bleomycin	water	ECA579	H	11	mean.TOF	148.034482758621
20170220	jmjdswap	NA	NA	6	bleomycin	water	ECA576	H	5	mean.TOF	123
20170220	jmjdswap	NA	NA	6	bleomycin	water	ECA577	H	7	mean.TOF	126.317880794702
20170220	jmjdswap	NA	NA	1	water	None	ECA579	A	11	q10.TOF	82.9
20170220	jmjdswap	NA	NA	1	water	None	ECA576	A	6	q10.TOF	85
20170220	jmjdswap	NA	NA	1	water	None	ECA579	B	11	q10.TOF	78
20170220	jmjdswap	NA	NA	1	water	None	ECA579	B	12	q10.TOF	81.5
20170220	jmjdswap	NA	NA	1	water	None	CB4856	B	4	q10.TOF	78
20170220	jmjdswap	NA	NA	1	water	None	ECA577	B	7	q10.TOF	86
20170220	jmjdswap	NA	NA	1	water	None	ECA578	C	10	q10.TOF	81.4
20170220	jmjdswap	NA	NA	1	water	None	ECA579	C	12	q10.TOF	83.6
20170220	jmjdswap	NA	NA	1	water	None	ECA576	C	6	q10.TOF	88.4
20170220	jmjdswap	NA	NA	1	water	None	ECA579	D	12	q10.TOF	88
20170220	jmjdswap	NA	NA	1	water	None	CB4856	D	3	q10.TOF	81
20170220	jmjdswap	NA	NA	1	water	None	CB4856	D	4	q10.TOF	72
20170220	jmjdswap	NA	NA	1	water	None	ECA576	D	5	q10.TOF	79
20170220	jmjdswap	NA	NA	1	water	None	ECA576	D	6	q10.TOF	94
20170220	jmjdswap	NA	NA	1	water	None	ECA577	D	7	q10.TOF	86
20170220	jmjdswap	NA	NA	1	water	None	ECA577	D	8	q10.TOF	94.6
20170220	jmjdswap	NA	NA	1	water	None	ECA578	D	9	q10.TOF	80.4
20170220	jmjdswap	NA	NA	1	water	None	ECA578	E	10	q10.TOF	79.1
20170220	jmjdswap	NA	NA	1	water	None	ECA579	E	11	q10.TOF	76.4
20170220	jmjdswap	NA	NA	1	water	None	N2	E	2	q10.TOF	81.1
20170220	jmjdswap	NA	NA	1	water	None	ECA577	E	7	q10.TOF	87
20170220	jmjdswap	NA	NA	1	water	None	ECA578	E	9	q10.TOF	81
20170220	jmjdswap	NA	NA	1	water	None	ECA576	F	5	q10.TOF	95.4
20170220	jmjdswap	NA	NA	1	water	None	ECA578	F	9	q10.TOF	81
20170220	jmjdswap	NA	NA	1	water	None	ECA578	G	10	q10.TOF	78
20170220	jmjdswap	NA	NA	1	water	None	ECA579	G	11	q10.TOF	76.6
20170220	jmjdswap	NA	NA	1	water	None	CB4856	G	4	q10.TOF	83.8
20170220	jmjdswap	NA	NA	1	water	None	ECA576	G	5	q10.TOF	97
20170220	jmjdswap	NA	NA	1	water	None	ECA576	G	6	q10.TOF	94
20170220	jmjdswap	NA	NA	1	water	None	ECA577	G	8	q10.TOF	84
20170220	jmjdswap	NA	NA	1	water	None	ECA578	G	9	q10.TOF	79.1
20170220	jmjdswap	NA	NA	1	water	None	ECA579	H	11	q10.TOF	82
20170220	jmjdswap	NA	NA	1	water	None	ECA577	H	7	q10.TOF	91
20170220	jmjdswap	NA	NA	2	bleomycin	water	ECA579	A	11	q10.TOF	71
20170220	jmjdswap	NA	NA	2	bleomycin	water	ECA579	A	12	q10.TOF	73.9
20170220	jmjdswap	NA	NA	2	bleomycin	water	CB4856	A	4	q10.TOF	74
20170220	jmjdswap	NA	NA	2	bleomycin	water	ECA576	A	5	q10.TOF	68.3
20170220	jmjdswap	NA	NA	2	bleomycin	water	ECA577	A	7	q10.TOF	64.8
20170220	jmjdswap	NA	NA	2	bleomycin	water	ECA577	A	8	q10.TOF	68.8
20170220	jmjdswap	NA	NA	2	bleomycin	water	ECA578	A	9	q10.TOF	75
20170220	jmjdswap	NA	NA	2	bleomycin	water	N2	B	1	q10.TOF	68
20170220	jmjdswap	NA	NA	2	bleomycin	water	ECA579	B	12	q10.TOF	72.2
20170220	jmjdswap	NA	NA	2	bleomycin	water	CB4856	B	3	q10.TOF	81.1
20170220	jmjdswap	NA	NA	2	bleomycin	water	ECA576	B	5	q10.TOF	63.9
20170220	jmjdswap	NA	NA	2	bleomycin	water	ECA576	B	6	q10.TOF	68
20170220	jmjdswap	NA	NA	2	bleomycin	water	ECA577	B	7	q10.TOF	64.6
20170220	jmjdswap	NA	NA	2	bleomycin	water	ECA577	B	8	q10.TOF	73
20170220	jmjdswap	NA	NA	2	bleomycin	water	ECA578	B	9	q10.TOF	72.8
20170220	jmjdswap	NA	NA	2	bleomycin	water	N2	C	1	q10.TOF	71
20170220	jmjdswap	NA	NA	2	bleomycin	water	ECA579	C	11	q10.TOF	75.4
20170220	jmjdswap	NA	NA	2	bleomycin	water	ECA579	C	12	q10.TOF	81.9
20170220	jmjdswap	NA	NA	2	bleomycin	water	N2	C	2	q10.TOF	70
20170220	jmjdswap	NA	NA	2	bleomycin	water	ECA576	C	5	q10.TOF	70.3
20170220	jmjdswap	NA	NA	2	bleomycin	water	ECA577	C	7	q10.TOF	68.7
20170220	jmjdswap	NA	NA	2	bleomycin	water	ECA577	C	8	q10.TOF	71
20170220	jmjdswap	NA	NA	2	bleomycin	water	N2	D	1	q10.TOF	70.8
20170220	jmjdswap	NA	NA	2	bleomycin	water	ECA578	D	10	q10.TOF	69.6
20170220	jmjdswap	NA	NA	2	bleomycin	water	ECA579	D	11	q10.TOF	72.2
20170220	jmjdswap	NA	NA	2	bleomycin	water	N2	D	2	q10.TOF	67.5
20170220	jmjdswap	NA	NA	2	bleomycin	water	CB4856	D	3	q10.TOF	75
20170220	jmjdswap	NA	NA	2	bleomycin	water	CB4856	D	4	q10.TOF	70.2
20170220	jmjdswap	NA	NA	2	bleomycin	water	ECA577	D	7	q10.TOF	69
20170220	jmjdswap	NA	NA	2	bleomycin	water	ECA578	D	9	q10.TOF	76
20170220	jmjdswap	NA	NA	2	bleomycin	water	N2	E	1	q10.TOF	67.4
20170220	jmjdswap	NA	NA	2	bleomycin	water	ECA578	E	10	q10.TOF	66.4
20170220	jmjdswap	NA	NA	2	bleomycin	water	ECA579	E	11	q10.TOF	83
20170220	jmjdswap	NA	NA	2	bleomycin	water	ECA579	E	12	q10.TOF	83
20170220	jmjdswap	NA	NA	2	bleomycin	water	N2	E	2	q10.TOF	66
20170220	jmjdswap	NA	NA	2	bleomycin	water	ECA576	E	5	q10.TOF	71.2
20170220	jmjdswap	NA	NA	2	bleomycin	water	ECA577	E	7	q10.TOF	70
20170220	jmjdswap	NA	NA	2	bleomycin	water	ECA579	F	11	q10.TOF	76
20170220	jmjdswap	NA	NA	2	bleomycin	water	CB4856	F	3	q10.TOF	80
20170220	jmjdswap	NA	NA	2	bleomycin	water	ECA577	F	7	q10.TOF	67.5
20170220	jmjdswap	NA	NA	2	bleomycin	water	ECA578	F	9	q10.TOF	75
20170220	jmjdswap	NA	NA	2	bleomycin	water	ECA579	G	11	q10.TOF	68
20170220	jmjdswap	NA	NA	2	bleomycin	water	N2	G	2	q10.TOF	68
20170220	jmjdswap	NA	NA	2	bleomycin	water	CB4856	G	3	q10.TOF	74
20170220	jmjdswap	NA	NA	2	bleomycin	water	CB4856	G	4	q10.TOF	69.8
20170220	jmjdswap	NA	NA	2	bleomycin	water	ECA576	G	6	q10.TOF	69.5
20170220	jmjdswap	NA	NA	2	bleomycin	water	ECA577	G	8	q10.TOF	68.3
20170220	jmjdswap	NA	NA	2	bleomycin	water	N2	H	1	q10.TOF	67
20170220	jmjdswap	NA	NA	2	bleomycin	water	ECA579	H	11	q10.TOF	68.8
20170220	jmjdswap	NA	NA	2	bleomycin	water	CB4856	H	3	q10.TOF	78
20170220	jmjdswap	NA	NA	2	bleomycin	water	ECA576	H	5	q10.TOF	71.6
20170220	jmjdswap	NA	NA	2	bleomycin	water	ECA577	H	7	q10.TOF	70
20170220	jmjdswap	NA	NA	2	bleomycin	water	ECA578	H	9	q10.TOF	76.7
20170220	jmjdswap	NA	NA	3	water	None	CB4856	A	4	q10.TOF	80.7
20170220	jmjdswap	NA	NA	3	water	None	ECA576	A	5	q10.TOF	78.5
20170220	jmjdswap	NA	NA	3	water	None	ECA576	A	6	q10.TOF	89.8
20170220	jmjdswap	NA	NA	3	water	None	ECA577	A	8	q10.TOF	80.8
20170220	jmjdswap	NA	NA	3	water	None	ECA578	A	9	q10.TOF	87
20170220	jmjdswap	NA	NA	3	water	None	ECA578	B	10	q10.TOF	81
20170220	jmjdswap	NA	NA	3	water	None	ECA579	B	11	q10.TOF	89
20170220	jmjdswap	NA	NA	3	water	None	N2	B	2	q10.TOF	82
20170220	jmjdswap	NA	NA	3	water	None	CB4856	B	3	q10.TOF	89
20170220	jmjdswap	NA	NA	3	water	None	ECA577	B	8	q10.TOF	78
20170220	jmjdswap	NA	NA	3	water	None	ECA579	C	11	q10.TOF	81
20170220	jmjdswap	NA	NA	3	water	None	ECA579	C	12	q10.TOF	79.1
20170220	jmjdswap	NA	NA	3	water	None	CB4856	C	3	q10.TOF	80.8
20170220	jmjdswap	NA	NA	3	water	None	CB4856	C	4	q10.TOF	90.8
20170220	jmjdswap	NA	NA	3	water	None	ECA577	C	8	q10.TOF	87.8
20170220	jmjdswap	NA	NA	3	water	None	N2	D	1	q10.TOF	75.5
20170220	jmjdswap	NA	NA	3	water	None	ECA579	D	11	q10.TOF	88.7
20170220	jmjdswap	NA	NA	3	water	None	N2	D	2	q10.TOF	83.7
20170220	jmjdswap	NA	NA	3	water	None	CB4856	D	3	q10.TOF	80.7
20170220	jmjdswap	NA	NA	3	water	None	ECA577	D	7	q10.TOF	85
20170220	jmjdswap	NA	NA	3	water	None	ECA578	E	10	q10.TOF	81
20170220	jmjdswap	NA	NA	3	water	None	ECA579	E	12	q10.TOF	80.2
20170220	jmjdswap	NA	NA	3	water	None	ECA576	E	5	q10.TOF	82
20170220	jmjdswap	NA	NA	3	water	None	ECA577	E	7	q10.TOF	78
20170220	jmjdswap	NA	NA	3	water	None	ECA578	E	9	q10.TOF	75.6
20170220	jmjdswap	NA	NA	3	water	None	N2	F	1	q10.TOF	80
20170220	jmjdswap	NA	NA	3	water	None	ECA578	F	10	q10.TOF	83.7
20170220	jmjdswap	NA	NA	3	water	None	ECA579	F	11	q10.TOF	92
20170220	jmjdswap	NA	NA	3	water	None	ECA579	F	12	q10.TOF	84.4
20170220	jmjdswap	NA	NA	3	water	None	CB4856	F	3	q10.TOF	85
20170220	jmjdswap	NA	NA	3	water	None	CB4856	F	4	q10.TOF	81.2
20170220	jmjdswap	NA	NA	3	water	None	ECA576	F	5	q10.TOF	89
20170220	jmjdswap	NA	NA	3	water	None	ECA578	F	9	q10.TOF	81.8
20170220	jmjdswap	NA	NA	3	water	None	ECA579	G	12	q10.TOF	85.6
20170220	jmjdswap	NA	NA	3	water	None	ECA576	G	6	q10.TOF	83
20170220	jmjdswap	NA	NA	3	water	None	ECA577	G	7	q10.TOF	84
20170220	jmjdswap	NA	NA	3	water	None	N2	H	1	q10.TOF	74
20170220	jmjdswap	NA	NA	3	water	None	ECA577	H	7	q10.TOF	84.9
20170220	jmjdswap	NA	NA	3	water	None	ECA578	H	9	q10.TOF	74
20170220	jmjdswap	NA	NA	4	bleomycin	water	ECA579	A	12	q10.TOF	70
20170220	jmjdswap	NA	NA	4	bleomycin	water	CB4856	A	4	q10.TOF	66.6
20170220	jmjdswap	NA	NA	4	bleomycin	water	ECA576	A	5	q10.TOF	69.3
20170220	jmjdswap	NA	NA	4	bleomycin	water	ECA576	A	6	q10.TOF	66.8
20170220	jmjdswap	NA	NA	4	bleomycin	water	ECA578	A	9	q10.TOF	70
20170220	jmjdswap	NA	NA	4	bleomycin	water	ECA578	B	10	q10.TOF	73
20170220	jmjdswap	NA	NA	4	bleomycin	water	ECA579	B	11	q10.TOF	68
20170220	jmjdswap	NA	NA	4	bleomycin	water	N2	B	2	q10.TOF	69
20170220	jmjdswap	NA	NA	4	bleomycin	water	CB4856	B	4	q10.TOF	72.6
20170220	jmjdswap	NA	NA	4	bleomycin	water	ECA576	B	5	q10.TOF	68
20170220	jmjdswap	NA	NA	4	bleomycin	water	ECA577	B	7	q10.TOF	67
20170220	jmjdswap	NA	NA	4	bleomycin	water	ECA577	B	8	q10.TOF	65.6
20170220	jmjdswap	NA	NA	4	bleomycin	water	ECA578	B	9	q10.TOF	73.2
20170220	jmjdswap	NA	NA	4	bleomycin	water	ECA578	C	10	q10.TOF	69.6
20170220	jmjdswap	NA	NA	4	bleomycin	water	ECA579	C	11	q10.TOF	71.3
20170220	jmjdswap	NA	NA	4	bleomycin	water	CB4856	C	3	q10.TOF	72.7
20170220	jmjdswap	NA	NA	4	bleomycin	water	ECA576	C	5	q10.TOF	66.8
20170220	jmjdswap	NA	NA	4	bleomycin	water	ECA576	C	6	q10.TOF	66.1
20170220	jmjdswap	NA	NA	4	bleomycin	water	ECA577	C	8	q10.TOF	66
20170220	jmjdswap	NA	NA	4	bleomycin	water	ECA578	C	9	q10.TOF	72
20170220	jmjdswap	NA	NA	4	bleomycin	water	ECA579	D	11	q10.TOF	73.8
20170220	jmjdswap	NA	NA	4	bleomycin	water	N2	D	2	q10.TOF	69
20170220	jmjdswap	NA	NA	4	bleomycin	water	CB4856	D	4	q10.TOF	73
20170220	jmjdswap	NA	NA	4	bleomycin	water	ECA576	D	6	q10.TOF	69.3
20170220	jmjdswap	NA	NA	4	bleomycin	water	ECA577	D	7	q10.TOF	70
20170220	jmjdswap	NA	NA	4	bleomycin	water	ECA577	D	8	q10.TOF	69.9
20170220	jmjdswap	NA	NA	4	bleomycin	water	ECA578	D	9	q10.TOF	70
20170220	jmjdswap	NA	NA	4	bleomycin	water	ECA578	E	10	q10.TOF	67
20170220	jmjdswap	NA	NA	4	bleomycin	water	ECA579	E	11	q10.TOF	69
20170220	jmjdswap	NA	NA	4	bleomycin	water	ECA579	E	12	q10.TOF	71.9
20170220	jmjdswap	NA	NA	4	bleomycin	water	N2	E	2	q10.TOF	70
20170220	jmjdswap	NA	NA	4	bleomycin	water	CB4856	E	4	q10.TOF	77
20170220	jmjdswap	NA	NA	4	bleomycin	water	ECA576	E	5	q10.TOF	69.2
20170220	jmjdswap	NA	NA	4	bleomycin	water	ECA577	E	7	q10.TOF	68.4
20170220	jmjdswap	NA	NA	4	bleomycin	water	ECA577	E	8	q10.TOF	69.4
20170220	jmjdswap	NA	NA	4	bleomycin	water	ECA578	E	9	q10.TOF	77.9
20170220	jmjdswap	NA	NA	4	bleomycin	water	ECA579	F	12	q10.TOF	75
20170220	jmjdswap	NA	NA	4	bleomycin	water	CB4856	F	3	q10.TOF	72
20170220	jmjdswap	NA	NA	4	bleomycin	water	CB4856	F	4	q10.TOF	70.9
20170220	jmjdswap	NA	NA	4	bleomycin	water	ECA576	F	5	q10.TOF	68.1
20170220	jmjdswap	NA	NA	4	bleomycin	water	ECA578	F	9	q10.TOF	73
20170220	jmjdswap	NA	NA	4	bleomycin	water	N2	G	2	q10.TOF	67.3
20170220	jmjdswap	NA	NA	4	bleomycin	water	CB4856	G	3	q10.TOF	75
20170220	jmjdswap	NA	NA	4	bleomycin	water	ECA576	G	5	q10.TOF	70
20170220	jmjdswap	NA	NA	4	bleomycin	water	ECA578	G	9	q10.TOF	70.7
20170220	jmjdswap	NA	NA	4	bleomycin	water	CB4856	H	3	q10.TOF	70
20170220	jmjdswap	NA	NA	4	bleomycin	water	ECA576	H	5	q10.TOF	69.4
20170220	jmjdswap	NA	NA	4	bleomycin	water	ECA577	H	7	q10.TOF	69
20170220	jmjdswap	NA	NA	5	water	None	ECA578	A	10	q10.TOF	79.7
20170220	jmjdswap	NA	NA	5	water	None	ECA579	A	12	q10.TOF	88.2
20170220	jmjdswap	NA	NA	5	water	None	ECA576	A	5	q10.TOF	82
20170220	jmjdswap	NA	NA	5	water	None	ECA576	A	6	q10.TOF	79.6
20170220	jmjdswap	NA	NA	5	water	None	ECA578	A	9	q10.TOF	84.2
20170220	jmjdswap	NA	NA	5	water	None	ECA579	B	12	q10.TOF	83
20170220	jmjdswap	NA	NA	5	water	None	N2	B	2	q10.TOF	84
20170220	jmjdswap	NA	NA	5	water	None	CB4856	B	3	q10.TOF	76
20170220	jmjdswap	NA	NA	5	water	None	CB4856	B	4	q10.TOF	80
20170220	jmjdswap	NA	NA	5	water	None	ECA576	B	5	q10.TOF	87
20170220	jmjdswap	NA	NA	5	water	None	ECA577	B	7	q10.TOF	84
20170220	jmjdswap	NA	NA	5	water	None	ECA577	B	8	q10.TOF	90.3
20170220	jmjdswap	NA	NA	5	water	None	ECA578	B	9	q10.TOF	86
20170220	jmjdswap	NA	NA	5	water	None	N2	C	1	q10.TOF	78.1
20170220	jmjdswap	NA	NA	5	water	None	ECA578	C	10	q10.TOF	83.1
20170220	jmjdswap	NA	NA	5	water	None	ECA579	C	12	q10.TOF	74
20170220	jmjdswap	NA	NA	5	water	None	CB4856	C	3	q10.TOF	82.8
20170220	jmjdswap	NA	NA	5	water	None	CB4856	C	4	q10.TOF	79.9
20170220	jmjdswap	NA	NA	5	water	None	ECA576	C	5	q10.TOF	83
20170220	jmjdswap	NA	NA	5	water	None	ECA577	C	7	q10.TOF	86
20170220	jmjdswap	NA	NA	5	water	None	ECA577	C	8	q10.TOF	85
20170220	jmjdswap	NA	NA	5	water	None	ECA578	C	9	q10.TOF	87.6
20170220	jmjdswap	NA	NA	5	water	None	N2	D	1	q10.TOF	85
20170220	jmjdswap	NA	NA	5	water	None	ECA578	D	10	q10.TOF	83.6
20170220	jmjdswap	NA	NA	5	water	None	ECA579	D	12	q10.TOF	82
20170220	jmjdswap	NA	NA	5	water	None	N2	D	2	q10.TOF	82.4
20170220	jmjdswap	NA	NA	5	water	None	ECA576	D	5	q10.TOF	78
20170220	jmjdswap	NA	NA	5	water	None	ECA576	D	6	q10.TOF	78.2
20170220	jmjdswap	NA	NA	5	water	None	ECA577	D	7	q10.TOF	89
20170220	jmjdswap	NA	NA	5	water	None	ECA577	D	8	q10.TOF	85.8
20170220	jmjdswap	NA	NA	5	water	None	ECA579	E	12	q10.TOF	84
20170220	jmjdswap	NA	NA	5	water	None	N2	E	2	q10.TOF	79.8
20170220	jmjdswap	NA	NA	5	water	None	CB4856	E	3	q10.TOF	78
20170220	jmjdswap	NA	NA	5	water	None	CB4856	E	4	q10.TOF	82.1
20170220	jmjdswap	NA	NA	5	water	None	ECA576	E	5	q10.TOF	83
20170220	jmjdswap	NA	NA	5	water	None	ECA577	E	8	q10.TOF	84.4
20170220	jmjdswap	NA	NA	5	water	None	ECA578	E	9	q10.TOF	81
20170220	jmjdswap	NA	NA	5	water	None	ECA579	F	11	q10.TOF	76
20170220	jmjdswap	NA	NA	5	water	None	ECA579	F	12	q10.TOF	76
20170220	jmjdswap	NA	NA	5	water	None	N2	F	2	q10.TOF	80.4
20170220	jmjdswap	NA	NA	5	water	None	CB4856	F	3	q10.TOF	82.4
20170220	jmjdswap	NA	NA	5	water	None	CB4856	F	4	q10.TOF	85
20170220	jmjdswap	NA	NA	5	water	None	ECA576	F	6	q10.TOF	79
20170220	jmjdswap	NA	NA	5	water	None	ECA577	F	7	q10.TOF	92.2
20170220	jmjdswap	NA	NA	5	water	None	ECA577	F	8	q10.TOF	86.8
20170220	jmjdswap	NA	NA	5	water	None	ECA578	F	9	q10.TOF	80
20170220	jmjdswap	NA	NA	5	water	None	ECA578	G	10	q10.TOF	80.9
20170220	jmjdswap	NA	NA	5	water	None	ECA579	G	11	q10.TOF	77
20170220	jmjdswap	NA	NA	5	water	None	ECA579	G	12	q10.TOF	75
20170220	jmjdswap	NA	NA	5	water	None	N2	G	2	q10.TOF	75.9
20170220	jmjdswap	NA	NA	5	water	None	CB4856	G	3	q10.TOF	78.1
20170220	jmjdswap	NA	NA	5	water	None	ECA576	G	5	q10.TOF	83
20170220	jmjdswap	NA	NA	5	water	None	ECA576	G	6	q10.TOF	83
20170220	jmjdswap	NA	NA	5	water	None	ECA578	G	9	q10.TOF	83.4
20170220	jmjdswap	NA	NA	5	water	None	N2	H	1	q10.TOF	80.4
20170220	jmjdswap	NA	NA	5	water	None	CB4856	H	3	q10.TOF	72.9
20170220	jmjdswap	NA	NA	6	bleomycin	water	N2	A	1	q10.TOF	69
20170220	jmjdswap	NA	NA	6	bleomycin	water	ECA578	A	10	q10.TOF	74.7
20170220	jmjdswap	NA	NA	6	bleomycin	water	ECA579	A	11	q10.TOF	73
20170220	jmjdswap	NA	NA	6	bleomycin	water	N2	A	2	q10.TOF	69
20170220	jmjdswap	NA	NA	6	bleomycin	water	CB4856	A	3	q10.TOF	75
20170220	jmjdswap	NA	NA	6	bleomycin	water	CB4856	A	4	q10.TOF	73
20170220	jmjdswap	NA	NA	6	bleomycin	water	ECA576	A	5	q10.TOF	69.7
20170220	jmjdswap	NA	NA	6	bleomycin	water	ECA576	A	6	q10.TOF	73.1
20170220	jmjdswap	NA	NA	6	bleomycin	water	ECA577	A	7	q10.TOF	69
20170220	jmjdswap	NA	NA	6	bleomycin	water	ECA577	A	8	q10.TOF	69
20170220	jmjdswap	NA	NA	6	bleomycin	water	ECA578	A	9	q10.TOF	77
20170220	jmjdswap	NA	NA	6	bleomycin	water	ECA578	B	10	q10.TOF	79
20170220	jmjdswap	NA	NA	6	bleomycin	water	ECA579	B	11	q10.TOF	76
20170220	jmjdswap	NA	NA	6	bleomycin	water	ECA579	B	12	q10.TOF	71.7
20170220	jmjdswap	NA	NA	6	bleomycin	water	CB4856	B	3	q10.TOF	70
20170220	jmjdswap	NA	NA	6	bleomycin	water	ECA576	B	5	q10.TOF	64.8
20170220	jmjdswap	NA	NA	6	bleomycin	water	ECA577	B	7	q10.TOF	68.3
20170220	jmjdswap	NA	NA	6	bleomycin	water	ECA577	B	8	q10.TOF	70
20170220	jmjdswap	NA	NA	6	bleomycin	water	ECA578	B	9	q10.TOF	76.3
20170220	jmjdswap	NA	NA	6	bleomycin	water	N2	C	1	q10.TOF	72
20170220	jmjdswap	NA	NA	6	bleomycin	water	ECA578	C	10	q10.TOF	75
20170220	jmjdswap	NA	NA	6	bleomycin	water	ECA579	C	12	q10.TOF	73
20170220	jmjdswap	NA	NA	6	bleomycin	water	N2	C	2	q10.TOF	65.8
20170220	jmjdswap	NA	NA	6	bleomycin	water	CB4856	C	4	q10.TOF	79.2
20170220	jmjdswap	NA	NA	6	bleomycin	water	ECA577	C	8	q10.TOF	67.3
20170220	jmjdswap	NA	NA	6	bleomycin	water	ECA578	C	9	q10.TOF	79
20170220	jmjdswap	NA	NA	6	bleomycin	water	N2	D	1	q10.TOF	68.4
20170220	jmjdswap	NA	NA	6	bleomycin	water	ECA578	D	10	q10.TOF	81
20170220	jmjdswap	NA	NA	6	bleomycin	water	ECA579	D	11	q10.TOF	76
20170220	jmjdswap	NA	NA	6	bleomycin	water	ECA579	D	12	q10.TOF	70
20170220	jmjdswap	NA	NA	6	bleomycin	water	N2	D	2	q10.TOF	68.8
20170220	jmjdswap	NA	NA	6	bleomycin	water	CB4856	D	3	q10.TOF	72
20170220	jmjdswap	NA	NA	6	bleomycin	water	ECA576	D	5	q10.TOF	75.4
20170220	jmjdswap	NA	NA	6	bleomycin	water	ECA577	D	8	q10.TOF	70
20170220	jmjdswap	NA	NA	6	bleomycin	water	ECA578	D	9	q10.TOF	79
20170220	jmjdswap	NA	NA	6	bleomycin	water	N2	E	1	q10.TOF	70
20170220	jmjdswap	NA	NA	6	bleomycin	water	CB4856	E	3	q10.TOF	73
20170220	jmjdswap	NA	NA	6	bleomycin	water	CB4856	E	4	q10.TOF	68
20170220	jmjdswap	NA	NA	6	bleomycin	water	ECA576	E	5	q10.TOF	68
20170220	jmjdswap	NA	NA	6	bleomycin	water	ECA577	E	7	q10.TOF	66
20170220	jmjdswap	NA	NA	6	bleomycin	water	ECA577	E	8	q10.TOF	68
20170220	jmjdswap	NA	NA	6	bleomycin	water	ECA578	E	9	q10.TOF	77.7
20170220	jmjdswap	NA	NA	6	bleomycin	water	N2	F	1	q10.TOF	69
20170220	jmjdswap	NA	NA	6	bleomycin	water	ECA578	F	10	q10.TOF	72
20170220	jmjdswap	NA	NA	6	bleomycin	water	ECA579	F	11	q10.TOF	71
20170220	jmjdswap	NA	NA	6	bleomycin	water	CB4856	F	3	q10.TOF	77
20170220	jmjdswap	NA	NA	6	bleomycin	water	CB4856	F	4	q10.TOF	72
20170220	jmjdswap	NA	NA	6	bleomycin	water	ECA576	F	5	q10.TOF	73
20170220	jmjdswap	NA	NA	6	bleomycin	water	ECA577	F	7	q10.TOF	64
20170220	jmjdswap	NA	NA	6	bleomycin	water	ECA577	F	8	q10.TOF	68
20170220	jmjdswap	NA	NA	6	bleomycin	water	ECA578	F	9	q10.TOF	76.7
20170220	jmjdswap	NA	NA	6	bleomycin	water	N2	G	1	q10.TOF	65.4
20170220	jmjdswap	NA	NA	6	bleomycin	water	N2	G	2	q10.TOF	73.9
20170220	jmjdswap	NA	NA	6	bleomycin	water	CB4856	G	3	q10.TOF	72
20170220	jmjdswap	NA	NA	6	bleomycin	water	ECA576	G	5	q10.TOF	67
20170220	jmjdswap	NA	NA	6	bleomycin	water	ECA576	G	6	q10.TOF	68.9
20170220	jmjdswap	NA	NA	6	bleomycin	water	ECA577	G	8	q10.TOF	68
20170220	jmjdswap	NA	NA	6	bleomycin	water	ECA578	G	9	q10.TOF	70.4
20170220	jmjdswap	NA	NA	6	bleomycin	water	N2	H	1	q10.TOF	67
20170220	jmjdswap	NA	NA	6	bleomycin	water	ECA579	H	11	q10.TOF	69.7
20170220	jmjdswap	NA	NA	6	bleomycin	water	ECA576	H	5	q10.TOF	68.2
20170220	jmjdswap	NA	NA	6	bleomycin	water	ECA577	H	7	q10.TOF	67
20170220	jmjdswap	NA	NA	1	water	None	ECA579	A	11	q25.TOF	110.75
20170220	jmjdswap	NA	NA	1	water	None	ECA576	A	6	q25.TOF	114
20170220	jmjdswap	NA	NA	1	water	None	ECA579	B	11	q25.TOF	111.5
20170220	jmjdswap	NA	NA	1	water	None	ECA579	B	12	q25.TOF	112.5
20170220	jmjdswap	NA	NA	1	water	None	CB4856	B	4	q25.TOF	122.5
20170220	jmjdswap	NA	NA	1	water	None	ECA577	B	7	q25.TOF	126.5
20170220	jmjdswap	NA	NA	1	water	None	ECA578	C	10	q25.TOF	119
20170220	jmjdswap	NA	NA	1	water	None	ECA579	C	12	q25.TOF	132
20170220	jmjdswap	NA	NA	1	water	None	ECA576	C	6	q25.TOF	122.5
20170220	jmjdswap	NA	NA	1	water	None	ECA579	D	12	q25.TOF	127.5
20170220	jmjdswap	NA	NA	1	water	None	CB4856	D	3	q25.TOF	112.5
20170220	jmjdswap	NA	NA	1	water	None	CB4856	D	4	q25.TOF	100
20170220	jmjdswap	NA	NA	1	water	None	ECA576	D	5	q25.TOF	105
20170220	jmjdswap	NA	NA	1	water	None	ECA576	D	6	q25.TOF	126
20170220	jmjdswap	NA	NA	1	water	None	ECA577	D	7	q25.TOF	129.75
20170220	jmjdswap	NA	NA	1	water	None	ECA577	D	8	q25.TOF	140
20170220	jmjdswap	NA	NA	1	water	None	ECA578	D	9	q25.TOF	109
20170220	jmjdswap	NA	NA	1	water	None	ECA578	E	10	q25.TOF	112
20170220	jmjdswap	NA	NA	1	water	None	ECA579	E	11	q25.TOF	118
20170220	jmjdswap	NA	NA	1	water	None	N2	E	2	q25.TOF	109.75
20170220	jmjdswap	NA	NA	1	water	None	ECA577	E	7	q25.TOF	136.25
20170220	jmjdswap	NA	NA	1	water	None	ECA578	E	9	q25.TOF	118.5
20170220	jmjdswap	NA	NA	1	water	None	ECA576	F	5	q25.TOF	130
20170220	jmjdswap	NA	NA	1	water	None	ECA578	F	9	q25.TOF	119.5
20170220	jmjdswap	NA	NA	1	water	None	ECA578	G	10	q25.TOF	111.5
20170220	jmjdswap	NA	NA	1	water	None	ECA579	G	11	q25.TOF	107
20170220	jmjdswap	NA	NA	1	water	None	CB4856	G	4	q25.TOF	115
20170220	jmjdswap	NA	NA	1	water	None	ECA576	G	5	q25.TOF	145
20170220	jmjdswap	NA	NA	1	water	None	ECA576	G	6	q25.TOF	136
20170220	jmjdswap	NA	NA	1	water	None	ECA577	G	8	q25.TOF	137
20170220	jmjdswap	NA	NA	1	water	None	ECA578	G	9	q25.TOF	122.75
20170220	jmjdswap	NA	NA	1	water	None	ECA579	H	11	q25.TOF	122
20170220	jmjdswap	NA	NA	1	water	None	ECA577	H	7	q25.TOF	132
20170220	jmjdswap	NA	NA	2	bleomycin	water	ECA579	A	11	q25.TOF	92.5
20170220	jmjdswap	NA	NA	2	bleomycin	water	ECA579	A	12	q25.TOF	95
20170220	jmjdswap	NA	NA	2	bleomycin	water	CB4856	A	4	q25.TOF	92
20170220	jmjdswap	NA	NA	2	bleomycin	water	ECA576	A	5	q25.TOF	79
20170220	jmjdswap	NA	NA	2	bleomycin	water	ECA577	A	8	q25.TOF	83
20170220	jmjdswap	NA	NA	2	bleomycin	water	ECA578	A	9	q25.TOF	90.5
20170220	jmjdswap	NA	NA	2	bleomycin	water	N2	B	1	q25.TOF	78.5
20170220	jmjdswap	NA	NA	2	bleomycin	water	ECA579	B	12	q25.TOF	84.25
20170220	jmjdswap	NA	NA	2	bleomycin	water	CB4856	B	3	q25.TOF	105
20170220	jmjdswap	NA	NA	2	bleomycin	water	CB4856	B	4	q25.TOF	103.5
20170220	jmjdswap	NA	NA	2	bleomycin	water	ECA576	B	5	q25.TOF	79
20170220	jmjdswap	NA	NA	2	bleomycin	water	ECA576	B	6	q25.TOF	79.5
20170220	jmjdswap	NA	NA	2	bleomycin	water	ECA577	B	7	q25.TOF	73
20170220	jmjdswap	NA	NA	2	bleomycin	water	ECA577	B	8	q25.TOF	86
20170220	jmjdswap	NA	NA	2	bleomycin	water	ECA578	B	9	q25.TOF	93
20170220	jmjdswap	NA	NA	2	bleomycin	water	N2	C	1	q25.TOF	83.5
20170220	jmjdswap	NA	NA	2	bleomycin	water	ECA579	C	11	q25.TOF	107.5
20170220	jmjdswap	NA	NA	2	bleomycin	water	ECA579	C	12	q25.TOF	104
20170220	jmjdswap	NA	NA	2	bleomycin	water	ECA576	C	5	q25.TOF	89
20170220	jmjdswap	NA	NA	2	bleomycin	water	ECA577	C	7	q25.TOF	82
20170220	jmjdswap	NA	NA	2	bleomycin	water	ECA577	C	8	q25.TOF	89
20170220	jmjdswap	NA	NA	2	bleomycin	water	N2	D	1	q25.TOF	80.5
20170220	jmjdswap	NA	NA	2	bleomycin	water	ECA578	D	10	q25.TOF	84.5
20170220	jmjdswap	NA	NA	2	bleomycin	water	ECA579	D	11	q25.TOF	90
20170220	jmjdswap	NA	NA	2	bleomycin	water	N2	D	2	q25.TOF	81.25
20170220	jmjdswap	NA	NA	2	bleomycin	water	CB4856	D	3	q25.TOF	97
20170220	jmjdswap	NA	NA	2	bleomycin	water	CB4856	D	4	q25.TOF	78.5
20170220	jmjdswap	NA	NA	2	bleomycin	water	ECA577	D	7	q25.TOF	82.75
20170220	jmjdswap	NA	NA	2	bleomycin	water	ECA578	D	9	q25.TOF	103
20170220	jmjdswap	NA	NA	2	bleomycin	water	N2	E	1	q25.TOF	75
20170220	jmjdswap	NA	NA	2	bleomycin	water	ECA578	E	10	q25.TOF	97
20170220	jmjdswap	NA	NA	2	bleomycin	water	ECA579	E	12	q25.TOF	101
20170220	jmjdswap	NA	NA	2	bleomycin	water	N2	E	2	q25.TOF	79
20170220	jmjdswap	NA	NA	2	bleomycin	water	ECA576	E	5	q25.TOF	87.5
20170220	jmjdswap	NA	NA	2	bleomycin	water	ECA577	E	7	q25.TOF	83.25
20170220	jmjdswap	NA	NA	2	bleomycin	water	ECA579	F	11	q25.TOF	100
20170220	jmjdswap	NA	NA	2	bleomycin	water	CB4856	F	3	q25.TOF	103.25
20170220	jmjdswap	NA	NA	2	bleomycin	water	ECA576	F	5	q25.TOF	80
20170220	jmjdswap	NA	NA	2	bleomycin	water	ECA577	F	7	q25.TOF	78.75
20170220	jmjdswap	NA	NA	2	bleomycin	water	ECA577	F	8	q25.TOF	86
20170220	jmjdswap	NA	NA	2	bleomycin	water	ECA578	F	9	q25.TOF	95
20170220	jmjdswap	NA	NA	2	bleomycin	water	ECA579	G	11	q25.TOF	82
20170220	jmjdswap	NA	NA	2	bleomycin	water	N2	G	2	q25.TOF	78
20170220	jmjdswap	NA	NA	2	bleomycin	water	CB4856	G	3	q25.TOF	99.25
20170220	jmjdswap	NA	NA	2	bleomycin	water	CB4856	G	4	q25.TOF	81.5
20170220	jmjdswap	NA	NA	2	bleomycin	water	ECA577	G	8	q25.TOF	76.75
20170220	jmjdswap	NA	NA	2	bleomycin	water	N2	H	1	q25.TOF	84
20170220	jmjdswap	NA	NA	2	bleomycin	water	CB4856	H	3	q25.TOF	97
20170220	jmjdswap	NA	NA	2	bleomycin	water	ECA576	H	5	q25.TOF	78.5
20170220	jmjdswap	NA	NA	2	bleomycin	water	ECA577	H	7	q25.TOF	85
20170220	jmjdswap	NA	NA	2	bleomycin	water	ECA578	H	9	q25.TOF	99.5
20170220	jmjdswap	NA	NA	3	water	None	CB4856	A	4	q25.TOF	122.25
20170220	jmjdswap	NA	NA	3	water	None	ECA576	A	5	q25.TOF	126.25
20170220	jmjdswap	NA	NA	3	water	None	ECA576	A	6	q25.TOF	144
20170220	jmjdswap	NA	NA	3	water	None	ECA577	A	8	q25.TOF	133.5
20170220	jmjdswap	NA	NA	3	water	None	ECA578	A	9	q25.TOF	143
20170220	jmjdswap	NA	NA	3	water	None	ECA578	B	10	q25.TOF	122
20170220	jmjdswap	NA	NA	3	water	None	ECA579	B	11	q25.TOF	139
20170220	jmjdswap	NA	NA	3	water	None	N2	B	2	q25.TOF	124.75
20170220	jmjdswap	NA	NA	3	water	None	CB4856	B	3	q25.TOF	141
20170220	jmjdswap	NA	NA	3	water	None	ECA577	B	8	q25.TOF	108
20170220	jmjdswap	NA	NA	3	water	None	N2	C	1	q25.TOF	116
20170220	jmjdswap	NA	NA	3	water	None	ECA579	C	11	q25.TOF	126
20170220	jmjdswap	NA	NA	3	water	None	ECA579	C	12	q25.TOF	118.75
20170220	jmjdswap	NA	NA	3	water	None	CB4856	C	3	q25.TOF	129
20170220	jmjdswap	NA	NA	3	water	None	CB4856	C	4	q25.TOF	137
20170220	jmjdswap	NA	NA	3	water	None	N2	D	1	q25.TOF	121.5
20170220	jmjdswap	NA	NA	3	water	None	ECA579	D	11	q25.TOF	132.25
20170220	jmjdswap	NA	NA	3	water	None	N2	D	2	q25.TOF	115
20170220	jmjdswap	NA	NA	3	water	None	CB4856	D	3	q25.TOF	131
20170220	jmjdswap	NA	NA	3	water	None	ECA577	D	7	q25.TOF	127
20170220	jmjdswap	NA	NA	3	water	None	ECA578	E	10	q25.TOF	128
20170220	jmjdswap	NA	NA	3	water	None	ECA579	E	12	q25.TOF	126.5
20170220	jmjdswap	NA	NA	3	water	None	ECA576	E	5	q25.TOF	123.25
20170220	jmjdswap	NA	NA	3	water	None	ECA577	E	7	q25.TOF	118
20170220	jmjdswap	NA	NA	3	water	None	ECA578	E	9	q25.TOF	129
20170220	jmjdswap	NA	NA	3	water	None	N2	F	1	q25.TOF	109
20170220	jmjdswap	NA	NA	3	water	None	ECA578	F	10	q25.TOF	122.25
20170220	jmjdswap	NA	NA	3	water	None	ECA579	F	11	q25.TOF	145
20170220	jmjdswap	NA	NA	3	water	None	ECA579	F	12	q25.TOF	142
20170220	jmjdswap	NA	NA	3	water	None	CB4856	F	3	q25.TOF	119.75
20170220	jmjdswap	NA	NA	3	water	None	CB4856	F	4	q25.TOF	126
20170220	jmjdswap	NA	NA	3	water	None	ECA576	F	5	q25.TOF	136.25
20170220	jmjdswap	NA	NA	3	water	None	ECA577	F	7	q25.TOF	121.75
20170220	jmjdswap	NA	NA	3	water	None	ECA578	F	9	q25.TOF	132.5
20170220	jmjdswap	NA	NA	3	water	None	ECA579	G	12	q25.TOF	128
20170220	jmjdswap	NA	NA	3	water	None	ECA576	G	6	q25.TOF	118
20170220	jmjdswap	NA	NA	3	water	None	ECA577	G	7	q25.TOF	121
20170220	jmjdswap	NA	NA	3	water	None	N2	H	1	q25.TOF	108.5
20170220	jmjdswap	NA	NA	3	water	None	ECA577	H	7	q25.TOF	135.25
20170220	jmjdswap	NA	NA	3	water	None	ECA578	H	9	q25.TOF	115
20170220	jmjdswap	NA	NA	4	bleomycin	water	ECA579	A	12	q25.TOF	80
20170220	jmjdswap	NA	NA	4	bleomycin	water	CB4856	A	4	q25.TOF	78
20170220	jmjdswap	NA	NA	4	bleomycin	water	ECA576	A	5	q25.TOF	82.25
20170220	jmjdswap	NA	NA	4	bleomycin	water	ECA576	A	6	q25.TOF	75
20170220	jmjdswap	NA	NA	4	bleomycin	water	ECA578	A	9	q25.TOF	83
20170220	jmjdswap	NA	NA	4	bleomycin	water	ECA578	B	10	q25.TOF	84.25
20170220	jmjdswap	NA	NA	4	bleomycin	water	ECA579	B	11	q25.TOF	80.25
20170220	jmjdswap	NA	NA	4	bleomycin	water	N2	B	2	q25.TOF	78.25
20170220	jmjdswap	NA	NA	4	bleomycin	water	CB4856	B	4	q25.TOF	95
20170220	jmjdswap	NA	NA	4	bleomycin	water	ECA576	B	5	q25.TOF	79
20170220	jmjdswap	NA	NA	4	bleomycin	water	ECA577	B	7	q25.TOF	71
20170220	jmjdswap	NA	NA	4	bleomycin	water	ECA577	B	8	q25.TOF	73
20170220	jmjdswap	NA	NA	4	bleomycin	water	ECA578	B	9	q25.TOF	85
20170220	jmjdswap	NA	NA	4	bleomycin	water	ECA578	C	10	q25.TOF	86
20170220	jmjdswap	NA	NA	4	bleomycin	water	ECA579	C	11	q25.TOF	89
20170220	jmjdswap	NA	NA	4	bleomycin	water	CB4856	C	3	q25.TOF	87
20170220	jmjdswap	NA	NA	4	bleomycin	water	ECA576	C	5	q25.TOF	80
20170220	jmjdswap	NA	NA	4	bleomycin	water	ECA576	C	6	q25.TOF	78
20170220	jmjdswap	NA	NA	4	bleomycin	water	ECA577	C	8	q25.TOF	74
20170220	jmjdswap	NA	NA	4	bleomycin	water	ECA578	C	9	q25.TOF	92
20170220	jmjdswap	NA	NA	4	bleomycin	water	ECA579	D	11	q25.TOF	90
20170220	jmjdswap	NA	NA	4	bleomycin	water	N2	D	2	q25.TOF	76
20170220	jmjdswap	NA	NA	4	bleomycin	water	CB4856	D	4	q25.TOF	90
20170220	jmjdswap	NA	NA	4	bleomycin	water	ECA576	D	6	q25.TOF	84
20170220	jmjdswap	NA	NA	4	bleomycin	water	ECA577	D	7	q25.TOF	81.25
20170220	jmjdswap	NA	NA	4	bleomycin	water	ECA577	D	8	q25.TOF	79
20170220	jmjdswap	NA	NA	4	bleomycin	water	ECA578	D	9	q25.TOF	86
20170220	jmjdswap	NA	NA	4	bleomycin	water	ECA578	E	10	q25.TOF	85.75
20170220	jmjdswap	NA	NA	4	bleomycin	water	ECA579	E	11	q25.TOF	83.25
20170220	jmjdswap	NA	NA	4	bleomycin	water	ECA579	E	12	q25.TOF	79.25
20170220	jmjdswap	NA	NA	4	bleomycin	water	N2	E	2	q25.TOF	76
20170220	jmjdswap	NA	NA	4	bleomycin	water	CB4856	E	4	q25.TOF	93
20170220	jmjdswap	NA	NA	4	bleomycin	water	ECA576	E	5	q25.TOF	84
20170220	jmjdswap	NA	NA	4	bleomycin	water	ECA577	E	7	q25.TOF	79
20170220	jmjdswap	NA	NA	4	bleomycin	water	ECA577	E	8	q25.TOF	81
20170220	jmjdswap	NA	NA	4	bleomycin	water	ECA578	E	9	q25.TOF	93.75
20170220	jmjdswap	NA	NA	4	bleomycin	water	ECA579	F	12	q25.TOF	92.25
20170220	jmjdswap	NA	NA	4	bleomycin	water	CB4856	F	3	q25.TOF	85
20170220	jmjdswap	NA	NA	4	bleomycin	water	CB4856	F	4	q25.TOF	85.25
20170220	jmjdswap	NA	NA	4	bleomycin	water	ECA576	F	5	q25.TOF	80
20170220	jmjdswap	NA	NA	4	bleomycin	water	ECA578	F	9	q25.TOF	96
20170220	jmjdswap	NA	NA	4	bleomycin	water	N2	G	2	q25.TOF	79.25
20170220	jmjdswap	NA	NA	4	bleomycin	water	CB4856	G	3	q25.TOF	91.25
20170220	jmjdswap	NA	NA	4	bleomycin	water	ECA576	G	5	q25.TOF	76
20170220	jmjdswap	NA	NA	4	bleomycin	water	ECA578	G	9	q25.TOF	83
20170220	jmjdswap	NA	NA	4	bleomycin	water	CB4856	H	3	q25.TOF	80.25
20170220	jmjdswap	NA	NA	4	bleomycin	water	ECA576	H	5	q25.TOF	77
20170220	jmjdswap	NA	NA	4	bleomycin	water	ECA577	H	7	q25.TOF	84
20170220	jmjdswap	NA	NA	5	water	None	ECA578	A	10	q25.TOF	128
20170220	jmjdswap	NA	NA	5	water	None	ECA579	A	12	q25.TOF	142
20170220	jmjdswap	NA	NA	5	water	None	ECA576	A	5	q25.TOF	126
20170220	jmjdswap	NA	NA	5	water	None	ECA576	A	6	q25.TOF	131
20170220	jmjdswap	NA	NA	5	water	None	ECA578	A	9	q25.TOF	127
20170220	jmjdswap	NA	NA	5	water	None	ECA579	B	12	q25.TOF	129
20170220	jmjdswap	NA	NA	5	water	None	N2	B	2	q25.TOF	125.5
20170220	jmjdswap	NA	NA	5	water	None	CB4856	B	3	q25.TOF	101
20170220	jmjdswap	NA	NA	5	water	None	CB4856	B	4	q25.TOF	115
20170220	jmjdswap	NA	NA	5	water	None	ECA576	B	5	q25.TOF	127
20170220	jmjdswap	NA	NA	5	water	None	ECA577	B	7	q25.TOF	121.25
20170220	jmjdswap	NA	NA	5	water	None	ECA577	B	8	q25.TOF	139
20170220	jmjdswap	NA	NA	5	water	None	ECA578	B	9	q25.TOF	125
20170220	jmjdswap	NA	NA	5	water	None	N2	C	1	q25.TOF	111.25
20170220	jmjdswap	NA	NA	5	water	None	ECA578	C	10	q25.TOF	123.25
20170220	jmjdswap	NA	NA	5	water	None	ECA579	C	12	q25.TOF	109.75
20170220	jmjdswap	NA	NA	5	water	None	CB4856	C	3	q25.TOF	127
20170220	jmjdswap	NA	NA	5	water	None	CB4856	C	4	q25.TOF	122.75
20170220	jmjdswap	NA	NA	5	water	None	ECA576	C	5	q25.TOF	126.5
20170220	jmjdswap	NA	NA	5	water	None	ECA577	C	7	q25.TOF	123.5
20170220	jmjdswap	NA	NA	5	water	None	ECA577	C	8	q25.TOF	133.5
20170220	jmjdswap	NA	NA	5	water	None	ECA578	C	9	q25.TOF	142
20170220	jmjdswap	NA	NA	5	water	None	N2	D	1	q25.TOF	108.75
20170220	jmjdswap	NA	NA	5	water	None	ECA579	D	12	q25.TOF	130.25
20170220	jmjdswap	NA	NA	5	water	None	N2	D	2	q25.TOF	115.5
20170220	jmjdswap	NA	NA	5	water	None	ECA576	D	5	q25.TOF	123
20170220	jmjdswap	NA	NA	5	water	None	ECA576	D	6	q25.TOF	111
20170220	jmjdswap	NA	NA	5	water	None	ECA577	D	7	q25.TOF	136
20170220	jmjdswap	NA	NA	5	water	None	ECA577	D	8	q25.TOF	132.5
20170220	jmjdswap	NA	NA	5	water	None	ECA578	D	9	q25.TOF	138
20170220	jmjdswap	NA	NA	5	water	None	ECA579	E	12	q25.TOF	111.25
20170220	jmjdswap	NA	NA	5	water	None	N2	E	2	q25.TOF	112
20170220	jmjdswap	NA	NA	5	water	None	CB4856	E	3	q25.TOF	114.5
20170220	jmjdswap	NA	NA	5	water	None	CB4856	E	4	q25.TOF	129.75
20170220	jmjdswap	NA	NA	5	water	None	ECA576	E	5	q25.TOF	127
20170220	jmjdswap	NA	NA	5	water	None	ECA577	E	8	q25.TOF	132.5
20170220	jmjdswap	NA	NA	5	water	None	ECA578	E	9	q25.TOF	128
20170220	jmjdswap	NA	NA	5	water	None	ECA579	F	11	q25.TOF	114
20170220	jmjdswap	NA	NA	5	water	None	ECA579	F	12	q25.TOF	114.5
20170220	jmjdswap	NA	NA	5	water	None	N2	F	2	q25.TOF	119
20170220	jmjdswap	NA	NA	5	water	None	CB4856	F	3	q25.TOF	134.5
20170220	jmjdswap	NA	NA	5	water	None	CB4856	F	4	q25.TOF	117
20170220	jmjdswap	NA	NA	5	water	None	ECA576	F	6	q25.TOF	144
20170220	jmjdswap	NA	NA	5	water	None	ECA577	F	7	q25.TOF	137
20170220	jmjdswap	NA	NA	5	water	None	ECA577	F	8	q25.TOF	132
20170220	jmjdswap	NA	NA	5	water	None	ECA578	F	9	q25.TOF	120
20170220	jmjdswap	NA	NA	5	water	None	ECA578	G	10	q25.TOF	114
20170220	jmjdswap	NA	NA	5	water	None	ECA579	G	11	q25.TOF	133.5
20170220	jmjdswap	NA	NA	5	water	None	ECA579	G	12	q25.TOF	109
20170220	jmjdswap	NA	NA	5	water	None	N2	G	2	q25.TOF	111
20170220	jmjdswap	NA	NA	5	water	None	CB4856	G	3	q25.TOF	117.5
20170220	jmjdswap	NA	NA	5	water	None	ECA576	G	5	q25.TOF	118.5
20170220	jmjdswap	NA	NA	5	water	None	ECA576	G	6	q25.TOF	133.75
20170220	jmjdswap	NA	NA	5	water	None	ECA578	G	9	q25.TOF	126
20170220	jmjdswap	NA	NA	5	water	None	N2	H	1	q25.TOF	100.5
20170220	jmjdswap	NA	NA	5	water	None	CB4856	H	3	q25.TOF	109.75
20170220	jmjdswap	NA	NA	6	bleomycin	water	N2	A	1	q25.TOF	81
20170220	jmjdswap	NA	NA	6	bleomycin	water	ECA578	A	10	q25.TOF	96
20170220	jmjdswap	NA	NA	6	bleomycin	water	ECA579	A	11	q25.TOF	89
20170220	jmjdswap	NA	NA	6	bleomycin	water	N2	A	2	q25.TOF	81.5
20170220	jmjdswap	NA	NA	6	bleomycin	water	CB4856	A	3	q25.TOF	96
20170220	jmjdswap	NA	NA	6	bleomycin	water	CB4856	A	4	q25.TOF	88
20170220	jmjdswap	NA	NA	6	bleomycin	water	ECA576	A	5	q25.TOF	85
20170220	jmjdswap	NA	NA	6	bleomycin	water	ECA576	A	6	q25.TOF	85.75
20170220	jmjdswap	NA	NA	6	bleomycin	water	ECA577	A	7	q25.TOF	82.5
20170220	jmjdswap	NA	NA	6	bleomycin	water	ECA577	A	8	q25.TOF	89
20170220	jmjdswap	NA	NA	6	bleomycin	water	ECA578	A	9	q25.TOF	103
20170220	jmjdswap	NA	NA	6	bleomycin	water	ECA578	B	10	q25.TOF	98
20170220	jmjdswap	NA	NA	6	bleomycin	water	ECA579	B	11	q25.TOF	98
20170220	jmjdswap	NA	NA	6	bleomycin	water	ECA579	B	12	q25.TOF	93
20170220	jmjdswap	NA	NA	6	bleomycin	water	CB4856	B	3	q25.TOF	91
20170220	jmjdswap	NA	NA	6	bleomycin	water	ECA576	B	5	q25.TOF	76.5
20170220	jmjdswap	NA	NA	6	bleomycin	water	ECA577	B	7	q25.TOF	78
20170220	jmjdswap	NA	NA	6	bleomycin	water	ECA577	B	8	q25.TOF	82
20170220	jmjdswap	NA	NA	6	bleomycin	water	ECA578	B	9	q25.TOF	99
20170220	jmjdswap	NA	NA	6	bleomycin	water	N2	C	1	q25.TOF	87
20170220	jmjdswap	NA	NA	6	bleomycin	water	ECA578	C	10	q25.TOF	100
20170220	jmjdswap	NA	NA	6	bleomycin	water	ECA579	C	11	q25.TOF	103
20170220	jmjdswap	NA	NA	6	bleomycin	water	ECA579	C	12	q25.TOF	91.25
20170220	jmjdswap	NA	NA	6	bleomycin	water	N2	C	2	q25.TOF	77.5
20170220	jmjdswap	NA	NA	6	bleomycin	water	CB4856	C	4	q25.TOF	91.5
20170220	jmjdswap	NA	NA	6	bleomycin	water	ECA577	C	8	q25.TOF	79.5
20170220	jmjdswap	NA	NA	6	bleomycin	water	ECA578	C	9	q25.TOF	101
20170220	jmjdswap	NA	NA	6	bleomycin	water	N2	D	1	q25.TOF	79.25
20170220	jmjdswap	NA	NA	6	bleomycin	water	ECA578	D	10	q25.TOF	103
20170220	jmjdswap	NA	NA	6	bleomycin	water	ECA579	D	11	q25.TOF	94.25
20170220	jmjdswap	NA	NA	6	bleomycin	water	ECA579	D	12	q25.TOF	88
20170220	jmjdswap	NA	NA	6	bleomycin	water	N2	D	2	q25.TOF	77
20170220	jmjdswap	NA	NA	6	bleomycin	water	CB4856	D	3	q25.TOF	93
20170220	jmjdswap	NA	NA	6	bleomycin	water	ECA576	D	5	q25.TOF	86
20170220	jmjdswap	NA	NA	6	bleomycin	water	ECA577	D	8	q25.TOF	83
20170220	jmjdswap	NA	NA	6	bleomycin	water	ECA578	D	9	q25.TOF	105
20170220	jmjdswap	NA	NA	6	bleomycin	water	N2	E	1	q25.TOF	84
20170220	jmjdswap	NA	NA	6	bleomycin	water	ECA579	E	11	q25.TOF	98.5
20170220	jmjdswap	NA	NA	6	bleomycin	water	CB4856	E	3	q25.TOF	91
20170220	jmjdswap	NA	NA	6	bleomycin	water	CB4856	E	4	q25.TOF	79
20170220	jmjdswap	NA	NA	6	bleomycin	water	ECA576	E	5	q25.TOF	79
20170220	jmjdswap	NA	NA	6	bleomycin	water	ECA577	E	7	q25.TOF	75
20170220	jmjdswap	NA	NA	6	bleomycin	water	ECA577	E	8	q25.TOF	73
20170220	jmjdswap	NA	NA	6	bleomycin	water	ECA578	E	9	q25.TOF	105.75
20170220	jmjdswap	NA	NA	6	bleomycin	water	N2	F	1	q25.TOF	82.25
20170220	jmjdswap	NA	NA	6	bleomycin	water	ECA578	F	10	q25.TOF	94
20170220	jmjdswap	NA	NA	6	bleomycin	water	ECA579	F	11	q25.TOF	99
20170220	jmjdswap	NA	NA	6	bleomycin	water	N2	F	2	q25.TOF	85
20170220	jmjdswap	NA	NA	6	bleomycin	water	CB4856	F	3	q25.TOF	97
20170220	jmjdswap	NA	NA	6	bleomycin	water	CB4856	F	4	q25.TOF	91
20170220	jmjdswap	NA	NA	6	bleomycin	water	ECA576	F	5	q25.TOF	84.75
20170220	jmjdswap	NA	NA	6	bleomycin	water	ECA577	F	7	q25.TOF	74.5
20170220	jmjdswap	NA	NA	6	bleomycin	water	ECA577	F	8	q25.TOF	83.5
20170220	jmjdswap	NA	NA	6	bleomycin	water	ECA578	F	9	q25.TOF	95
20170220	jmjdswap	NA	NA	6	bleomycin	water	N2	G	1	q25.TOF	74.5
20170220	jmjdswap	NA	NA	6	bleomycin	water	N2	G	2	q25.TOF	80
20170220	jmjdswap	NA	NA	6	bleomycin	water	CB4856	G	3	q25.TOF	88
20170220	jmjdswap	NA	NA	6	bleomycin	water	ECA576	G	5	q25.TOF	80.25
20170220	jmjdswap	NA	NA	6	bleomycin	water	ECA576	G	6	q25.TOF	84.25
20170220	jmjdswap	NA	NA	6	bleomycin	water	ECA577	G	8	q25.TOF	74
20170220	jmjdswap	NA	NA	6	bleomycin	water	ECA578	G	9	q25.TOF	82
20170220	jmjdswap	NA	NA	6	bleomycin	water	N2	H	1	q25.TOF	75
20170220	jmjdswap	NA	NA	6	bleomycin	water	ECA579	H	11	q25.TOF	95.5
20170220	jmjdswap	NA	NA	6	bleomycin	water	ECA576	H	5	q25.TOF	76.5
20170220	jmjdswap	NA	NA	6	bleomycin	water	ECA577	H	7	q25.TOF	77.5
20170220	jmjdswap	NA	NA	1	water	None	ECA579	A	11	median.TOF	179.5
20170220	jmjdswap	NA	NA	1	water	None	ECA576	A	6	median.TOF	202
20170220	jmjdswap	NA	NA	1	water	None	ECA579	B	11	median.TOF	185.5
20170220	jmjdswap	NA	NA	1	water	None	ECA579	B	12	median.TOF	184.5
20170220	jmjdswap	NA	NA	1	water	None	CB4856	B	4	median.TOF	196
20170220	jmjdswap	NA	NA	1	water	None	ECA577	B	7	median.TOF	224
20170220	jmjdswap	NA	NA	1	water	None	ECA578	C	10	median.TOF	197
20170220	jmjdswap	NA	NA	1	water	None	ECA579	C	12	median.TOF	242
20170220	jmjdswap	NA	NA	1	water	None	ECA576	C	6	median.TOF	190
20170220	jmjdswap	NA	NA	1	water	None	ECA579	D	12	median.TOF	210.5
20170220	jmjdswap	NA	NA	1	water	None	CB4856	D	3	median.TOF	185
20170220	jmjdswap	NA	NA	1	water	None	CB4856	D	4	median.TOF	168
20170220	jmjdswap	NA	NA	1	water	None	ECA576	D	6	median.TOF	216.5
20170220	jmjdswap	NA	NA	1	water	None	ECA577	D	7	median.TOF	208
20170220	jmjdswap	NA	NA	1	water	None	ECA577	D	8	median.TOF	230
20170220	jmjdswap	NA	NA	1	water	None	ECA578	D	9	median.TOF	199
20170220	jmjdswap	NA	NA	1	water	None	ECA578	E	10	median.TOF	205
20170220	jmjdswap	NA	NA	1	water	None	ECA579	E	11	median.TOF	212
20170220	jmjdswap	NA	NA	1	water	None	N2	E	2	median.TOF	171
20170220	jmjdswap	NA	NA	1	water	None	ECA577	E	7	median.TOF	217
20170220	jmjdswap	NA	NA	1	water	None	ECA578	E	9	median.TOF	203
20170220	jmjdswap	NA	NA	1	water	None	ECA576	F	5	median.TOF	213
20170220	jmjdswap	NA	NA	1	water	None	ECA578	F	9	median.TOF	218.5
20170220	jmjdswap	NA	NA	1	water	None	ECA578	G	10	median.TOF	204.5
20170220	jmjdswap	NA	NA	1	water	None	ECA579	G	11	median.TOF	198
20170220	jmjdswap	NA	NA	1	water	None	CB4856	G	4	median.TOF	181
20170220	jmjdswap	NA	NA	1	water	None	ECA576	G	5	median.TOF	235
20170220	jmjdswap	NA	NA	1	water	None	ECA576	G	6	median.TOF	222.5
20170220	jmjdswap	NA	NA	1	water	None	ECA577	G	8	median.TOF	218.5
20170220	jmjdswap	NA	NA	1	water	None	ECA578	G	9	median.TOF	206.5
20170220	jmjdswap	NA	NA	1	water	None	ECA579	H	11	median.TOF	211
20170220	jmjdswap	NA	NA	1	water	None	ECA577	H	7	median.TOF	214.5
20170220	jmjdswap	NA	NA	2	bleomycin	water	ECA579	A	11	median.TOF	128
20170220	jmjdswap	NA	NA	2	bleomycin	water	ECA579	A	12	median.TOF	126
20170220	jmjdswap	NA	NA	2	bleomycin	water	CB4856	A	4	median.TOF	127
20170220	jmjdswap	NA	NA	2	bleomycin	water	ECA576	A	5	median.TOF	102
20170220	jmjdswap	NA	NA	2	bleomycin	water	ECA577	A	8	median.TOF	107
20170220	jmjdswap	NA	NA	2	bleomycin	water	ECA578	A	9	median.TOF	125
20170220	jmjdswap	NA	NA	2	bleomycin	water	N2	B	1	median.TOF	102
20170220	jmjdswap	NA	NA	2	bleomycin	water	ECA579	B	12	median.TOF	122
20170220	jmjdswap	NA	NA	2	bleomycin	water	CB4856	B	3	median.TOF	140.5
20170220	jmjdswap	NA	NA	2	bleomycin	water	CB4856	B	4	median.TOF	144
20170220	jmjdswap	NA	NA	2	bleomycin	water	ECA576	B	5	median.TOF	100.5
20170220	jmjdswap	NA	NA	2	bleomycin	water	ECA576	B	6	median.TOF	114
20170220	jmjdswap	NA	NA	2	bleomycin	water	ECA577	B	7	median.TOF	87
20170220	jmjdswap	NA	NA	2	bleomycin	water	ECA577	B	8	median.TOF	113
20170220	jmjdswap	NA	NA	2	bleomycin	water	ECA578	B	9	median.TOF	135
20170220	jmjdswap	NA	NA	2	bleomycin	water	N2	C	1	median.TOF	106.5
20170220	jmjdswap	NA	NA	2	bleomycin	water	ECA579	C	11	median.TOF	154.5
20170220	jmjdswap	NA	NA	2	bleomycin	water	ECA579	C	12	median.TOF	144
20170220	jmjdswap	NA	NA	2	bleomycin	water	N2	C	2	median.TOF	130
20170220	jmjdswap	NA	NA	2	bleomycin	water	ECA576	C	5	median.TOF	116
20170220	jmjdswap	NA	NA	2	bleomycin	water	ECA577	C	7	median.TOF	110
20170220	jmjdswap	NA	NA	2	bleomycin	water	ECA577	C	8	median.TOF	110
20170220	jmjdswap	NA	NA	2	bleomycin	water	N2	D	1	median.TOF	107
20170220	jmjdswap	NA	NA	2	bleomycin	water	ECA578	D	10	median.TOF	115
20170220	jmjdswap	NA	NA	2	bleomycin	water	ECA579	D	11	median.TOF	138
20170220	jmjdswap	NA	NA	2	bleomycin	water	N2	D	2	median.TOF	107.5
20170220	jmjdswap	NA	NA	2	bleomycin	water	CB4856	D	3	median.TOF	125.5
20170220	jmjdswap	NA	NA	2	bleomycin	water	CB4856	D	4	median.TOF	107
20170220	jmjdswap	NA	NA	2	bleomycin	water	ECA577	D	7	median.TOF	114
20170220	jmjdswap	NA	NA	2	bleomycin	water	ECA578	D	9	median.TOF	135.5
20170220	jmjdswap	NA	NA	2	bleomycin	water	N2	E	1	median.TOF	95
20170220	jmjdswap	NA	NA	2	bleomycin	water	ECA578	E	10	median.TOF	133
20170220	jmjdswap	NA	NA	2	bleomycin	water	ECA579	E	11	median.TOF	148
20170220	jmjdswap	NA	NA	2	bleomycin	water	ECA579	E	12	median.TOF	134
20170220	jmjdswap	NA	NA	2	bleomycin	water	N2	E	2	median.TOF	102
20170220	jmjdswap	NA	NA	2	bleomycin	water	ECA577	E	7	median.TOF	113.5
20170220	jmjdswap	NA	NA	2	bleomycin	water	ECA579	F	11	median.TOF	129
20170220	jmjdswap	NA	NA	2	bleomycin	water	CB4856	F	3	median.TOF	143
20170220	jmjdswap	NA	NA	2	bleomycin	water	ECA576	F	5	median.TOF	98
20170220	jmjdswap	NA	NA	2	bleomycin	water	ECA577	F	7	median.TOF	105.5
20170220	jmjdswap	NA	NA	2	bleomycin	water	ECA577	F	8	median.TOF	119
20170220	jmjdswap	NA	NA	2	bleomycin	water	ECA578	F	9	median.TOF	130
20170220	jmjdswap	NA	NA	2	bleomycin	water	ECA579	G	11	median.TOF	106
20170220	jmjdswap	NA	NA	2	bleomycin	water	N2	G	2	median.TOF	111
20170220	jmjdswap	NA	NA	2	bleomycin	water	CB4856	G	3	median.TOF	130.5
20170220	jmjdswap	NA	NA	2	bleomycin	water	CB4856	G	4	median.TOF	118
20170220	jmjdswap	NA	NA	2	bleomycin	water	ECA577	G	8	median.TOF	105
20170220	jmjdswap	NA	NA	2	bleomycin	water	N2	H	1	median.TOF	109
20170220	jmjdswap	NA	NA	2	bleomycin	water	CB4856	H	3	median.TOF	131.5
20170220	jmjdswap	NA	NA	2	bleomycin	water	ECA576	H	5	median.TOF	102
20170220	jmjdswap	NA	NA	2	bleomycin	water	ECA577	H	7	median.TOF	117.5
20170220	jmjdswap	NA	NA	2	bleomycin	water	ECA578	H	9	median.TOF	120
20170220	jmjdswap	NA	NA	3	water	None	CB4856	A	4	median.TOF	209
20170220	jmjdswap	NA	NA	3	water	None	ECA576	A	5	median.TOF	225
20170220	jmjdswap	NA	NA	3	water	None	ECA576	A	6	median.TOF	215
20170220	jmjdswap	NA	NA	3	water	None	ECA577	A	8	median.TOF	201
20170220	jmjdswap	NA	NA	3	water	None	ECA578	A	9	median.TOF	232
20170220	jmjdswap	NA	NA	3	water	None	ECA578	B	10	median.TOF	225
20170220	jmjdswap	NA	NA	3	water	None	ECA579	B	11	median.TOF	227
20170220	jmjdswap	NA	NA	3	water	None	N2	B	2	median.TOF	206
20170220	jmjdswap	NA	NA	3	water	None	CB4856	B	3	median.TOF	219
20170220	jmjdswap	NA	NA	3	water	None	ECA577	B	8	median.TOF	203
20170220	jmjdswap	NA	NA	3	water	None	N2	C	1	median.TOF	213
20170220	jmjdswap	NA	NA	3	water	None	ECA579	C	11	median.TOF	224
20170220	jmjdswap	NA	NA	3	water	None	ECA579	C	12	median.TOF	214.5
20170220	jmjdswap	NA	NA	3	water	None	CB4856	C	3	median.TOF	218
20170220	jmjdswap	NA	NA	3	water	None	CB4856	C	4	median.TOF	216
20170220	jmjdswap	NA	NA	3	water	None	N2	D	1	median.TOF	216
20170220	jmjdswap	NA	NA	3	water	None	ECA579	D	11	median.TOF	208
20170220	jmjdswap	NA	NA	3	water	None	N2	D	2	median.TOF	205.5
20170220	jmjdswap	NA	NA	3	water	None	CB4856	D	3	median.TOF	219.5
20170220	jmjdswap	NA	NA	3	water	None	ECA577	D	7	median.TOF	222
20170220	jmjdswap	NA	NA	3	water	None	ECA578	E	10	median.TOF	224
20170220	jmjdswap	NA	NA	3	water	None	ECA579	E	12	median.TOF	234
20170220	jmjdswap	NA	NA	3	water	None	ECA576	E	5	median.TOF	211.5
20170220	jmjdswap	NA	NA	3	water	None	ECA577	E	7	median.TOF	217
20170220	jmjdswap	NA	NA	3	water	None	ECA578	E	9	median.TOF	214
20170220	jmjdswap	NA	NA	3	water	None	N2	F	1	median.TOF	197.5
20170220	jmjdswap	NA	NA	3	water	None	ECA578	F	10	median.TOF	204
20170220	jmjdswap	NA	NA	3	water	None	ECA579	F	11	median.TOF	244
20170220	jmjdswap	NA	NA	3	water	None	ECA579	F	12	median.TOF	225
20170220	jmjdswap	NA	NA	3	water	None	CB4856	F	3	median.TOF	213.5
20170220	jmjdswap	NA	NA	3	water	None	CB4856	F	4	median.TOF	208
20170220	jmjdswap	NA	NA	3	water	None	ECA576	F	5	median.TOF	237
20170220	jmjdswap	NA	NA	3	water	None	ECA577	F	7	median.TOF	220
20170220	jmjdswap	NA	NA	3	water	None	ECA578	F	9	median.TOF	224
20170220	jmjdswap	NA	NA	3	water	None	ECA579	G	11	median.TOF	231
20170220	jmjdswap	NA	NA	3	water	None	ECA579	G	12	median.TOF	231
20170220	jmjdswap	NA	NA	3	water	None	ECA576	G	6	median.TOF	207
20170220	jmjdswap	NA	NA	3	water	None	ECA577	G	7	median.TOF	206
20170220	jmjdswap	NA	NA	3	water	None	N2	H	1	median.TOF	201.5
20170220	jmjdswap	NA	NA	3	water	None	ECA577	H	7	median.TOF	213
20170220	jmjdswap	NA	NA	3	water	None	ECA578	H	9	median.TOF	204.5
20170220	jmjdswap	NA	NA	4	bleomycin	water	ECA579	A	12	median.TOF	106
20170220	jmjdswap	NA	NA	4	bleomycin	water	CB4856	A	4	median.TOF	98
20170220	jmjdswap	NA	NA	4	bleomycin	water	ECA576	A	5	median.TOF	103.5
20170220	jmjdswap	NA	NA	4	bleomycin	water	ECA576	A	6	median.TOF	94
20170220	jmjdswap	NA	NA	4	bleomycin	water	ECA578	A	9	median.TOF	109.5
20170220	jmjdswap	NA	NA	4	bleomycin	water	ECA578	B	10	median.TOF	108.5
20170220	jmjdswap	NA	NA	4	bleomycin	water	ECA579	B	11	median.TOF	105.5
20170220	jmjdswap	NA	NA	4	bleomycin	water	N2	B	2	median.TOF	93.5
20170220	jmjdswap	NA	NA	4	bleomycin	water	CB4856	B	4	median.TOF	108
20170220	jmjdswap	NA	NA	4	bleomycin	water	ECA576	B	5	median.TOF	107
20170220	jmjdswap	NA	NA	4	bleomycin	water	ECA577	B	7	median.TOF	86
20170220	jmjdswap	NA	NA	4	bleomycin	water	ECA577	B	8	median.TOF	87
20170220	jmjdswap	NA	NA	4	bleomycin	water	ECA578	B	9	median.TOF	112
20170220	jmjdswap	NA	NA	4	bleomycin	water	ECA578	C	10	median.TOF	119
20170220	jmjdswap	NA	NA	4	bleomycin	water	ECA579	C	11	median.TOF	114
20170220	jmjdswap	NA	NA	4	bleomycin	water	CB4856	C	3	median.TOF	112
20170220	jmjdswap	NA	NA	4	bleomycin	water	ECA576	C	5	median.TOF	102
20170220	jmjdswap	NA	NA	4	bleomycin	water	ECA576	C	6	median.TOF	97.5
20170220	jmjdswap	NA	NA	4	bleomycin	water	ECA577	C	8	median.TOF	100
20170220	jmjdswap	NA	NA	4	bleomycin	water	ECA578	C	9	median.TOF	127
20170220	jmjdswap	NA	NA	4	bleomycin	water	ECA579	D	11	median.TOF	117
20170220	jmjdswap	NA	NA	4	bleomycin	water	N2	D	2	median.TOF	91
20170220	jmjdswap	NA	NA	4	bleomycin	water	CB4856	D	4	median.TOF	115
20170220	jmjdswap	NA	NA	4	bleomycin	water	ECA576	D	6	median.TOF	109.5
20170220	jmjdswap	NA	NA	4	bleomycin	water	ECA577	D	7	median.TOF	101
20170220	jmjdswap	NA	NA	4	bleomycin	water	ECA577	D	8	median.TOF	101
20170220	jmjdswap	NA	NA	4	bleomycin	water	ECA578	D	9	median.TOF	109
20170220	jmjdswap	NA	NA	4	bleomycin	water	ECA578	E	10	median.TOF	119
20170220	jmjdswap	NA	NA	4	bleomycin	water	ECA579	E	11	median.TOF	113
20170220	jmjdswap	NA	NA	4	bleomycin	water	ECA579	E	12	median.TOF	102.5
20170220	jmjdswap	NA	NA	4	bleomycin	water	N2	E	2	median.TOF	88
20170220	jmjdswap	NA	NA	4	bleomycin	water	CB4856	E	4	median.TOF	125
20170220	jmjdswap	NA	NA	4	bleomycin	water	ECA576	E	5	median.TOF	100
20170220	jmjdswap	NA	NA	4	bleomycin	water	ECA577	E	7	median.TOF	99
20170220	jmjdswap	NA	NA	4	bleomycin	water	ECA577	E	8	median.TOF	97
20170220	jmjdswap	NA	NA	4	bleomycin	water	ECA578	E	9	median.TOF	118.5
20170220	jmjdswap	NA	NA	4	bleomycin	water	ECA579	F	12	median.TOF	125
20170220	jmjdswap	NA	NA	4	bleomycin	water	CB4856	F	3	median.TOF	107
20170220	jmjdswap	NA	NA	4	bleomycin	water	CB4856	F	4	median.TOF	115.5
20170220	jmjdswap	NA	NA	4	bleomycin	water	ECA576	F	5	median.TOF	102
20170220	jmjdswap	NA	NA	4	bleomycin	water	ECA578	F	9	median.TOF	120
20170220	jmjdswap	NA	NA	4	bleomycin	water	N2	G	2	median.TOF	102
20170220	jmjdswap	NA	NA	4	bleomycin	water	CB4856	G	3	median.TOF	120.5
20170220	jmjdswap	NA	NA	4	bleomycin	water	ECA576	G	5	median.TOF	95
20170220	jmjdswap	NA	NA	4	bleomycin	water	ECA578	G	9	median.TOF	105
20170220	jmjdswap	NA	NA	4	bleomycin	water	CB4856	H	3	median.TOF	98
20170220	jmjdswap	NA	NA	4	bleomycin	water	ECA576	H	5	median.TOF	100
20170220	jmjdswap	NA	NA	4	bleomycin	water	ECA577	H	7	median.TOF	113
20170220	jmjdswap	NA	NA	5	water	None	ECA578	A	10	median.TOF	216.5
20170220	jmjdswap	NA	NA	5	water	None	ECA579	A	12	median.TOF	224
20170220	jmjdswap	NA	NA	5	water	None	CB4856	A	4	median.TOF	247.5
20170220	jmjdswap	NA	NA	5	water	None	ECA576	A	5	median.TOF	221
20170220	jmjdswap	NA	NA	5	water	None	ECA576	A	6	median.TOF	217
20170220	jmjdswap	NA	NA	5	water	None	ECA578	A	9	median.TOF	215
20170220	jmjdswap	NA	NA	5	water	None	ECA579	B	12	median.TOF	206
20170220	jmjdswap	NA	NA	5	water	None	N2	B	2	median.TOF	222
20170220	jmjdswap	NA	NA	5	water	None	CB4856	B	3	median.TOF	200
20170220	jmjdswap	NA	NA	5	water	None	CB4856	B	4	median.TOF	224.5
20170220	jmjdswap	NA	NA	5	water	None	ECA576	B	5	median.TOF	216
20170220	jmjdswap	NA	NA	5	water	None	ECA577	B	7	median.TOF	199
20170220	jmjdswap	NA	NA	5	water	None	ECA577	B	8	median.TOF	232.5
20170220	jmjdswap	NA	NA	5	water	None	ECA578	B	9	median.TOF	208
20170220	jmjdswap	NA	NA	5	water	None	N2	C	1	median.TOF	186.5
20170220	jmjdswap	NA	NA	5	water	None	ECA578	C	10	median.TOF	212.5
20170220	jmjdswap	NA	NA	5	water	None	ECA579	C	12	median.TOF	190.5
20170220	jmjdswap	NA	NA	5	water	None	CB4856	C	3	median.TOF	227
20170220	jmjdswap	NA	NA	5	water	None	CB4856	C	4	median.TOF	241
20170220	jmjdswap	NA	NA	5	water	None	ECA576	C	5	median.TOF	207
20170220	jmjdswap	NA	NA	5	water	None	ECA577	C	7	median.TOF	203
20170220	jmjdswap	NA	NA	5	water	None	ECA577	C	8	median.TOF	204
20170220	jmjdswap	NA	NA	5	water	None	ECA578	C	9	median.TOF	225
20170220	jmjdswap	NA	NA	5	water	None	N2	D	1	median.TOF	185
20170220	jmjdswap	NA	NA	5	water	None	ECA578	D	10	median.TOF	227
20170220	jmjdswap	NA	NA	5	water	None	ECA579	D	12	median.TOF	212
20170220	jmjdswap	NA	NA	5	water	None	N2	D	2	median.TOF	222
20170220	jmjdswap	NA	NA	5	water	None	ECA576	D	5	median.TOF	211
20170220	jmjdswap	NA	NA	5	water	None	ECA576	D	6	median.TOF	203
20170220	jmjdswap	NA	NA	5	water	None	ECA577	D	7	median.TOF	214
20170220	jmjdswap	NA	NA	5	water	None	ECA577	D	8	median.TOF	235
20170220	jmjdswap	NA	NA	5	water	None	ECA578	D	9	median.TOF	221
20170220	jmjdswap	NA	NA	5	water	None	ECA579	E	12	median.TOF	199.5
20170220	jmjdswap	NA	NA	5	water	None	N2	E	2	median.TOF	209
20170220	jmjdswap	NA	NA	5	water	None	CB4856	E	3	median.TOF	202
20170220	jmjdswap	NA	NA	5	water	None	ECA576	E	5	median.TOF	227
20170220	jmjdswap	NA	NA	5	water	None	ECA577	E	8	median.TOF	212
20170220	jmjdswap	NA	NA	5	water	None	ECA578	E	9	median.TOF	217
20170220	jmjdswap	NA	NA	5	water	None	ECA579	F	11	median.TOF	215
20170220	jmjdswap	NA	NA	5	water	None	ECA579	F	12	median.TOF	202
20170220	jmjdswap	NA	NA	5	water	None	N2	F	2	median.TOF	205
20170220	jmjdswap	NA	NA	5	water	None	CB4856	F	3	median.TOF	221
20170220	jmjdswap	NA	NA	5	water	None	CB4856	F	4	median.TOF	180
20170220	jmjdswap	NA	NA	5	water	None	ECA576	F	6	median.TOF	223.5
20170220	jmjdswap	NA	NA	5	water	None	ECA577	F	7	median.TOF	211
20170220	jmjdswap	NA	NA	5	water	None	ECA577	F	8	median.TOF	203
20170220	jmjdswap	NA	NA	5	water	None	ECA578	F	9	median.TOF	204
20170220	jmjdswap	NA	NA	5	water	None	ECA578	G	10	median.TOF	203.5
20170220	jmjdswap	NA	NA	5	water	None	ECA579	G	11	median.TOF	215.5
20170220	jmjdswap	NA	NA	5	water	None	ECA579	G	12	median.TOF	190.5
20170220	jmjdswap	NA	NA	5	water	None	N2	G	2	median.TOF	200.5
20170220	jmjdswap	NA	NA	5	water	None	CB4856	G	3	median.TOF	235
20170220	jmjdswap	NA	NA	5	water	None	ECA576	G	5	median.TOF	209
20170220	jmjdswap	NA	NA	5	water	None	ECA576	G	6	median.TOF	201
20170220	jmjdswap	NA	NA	5	water	None	ECA577	G	8	median.TOF	213
20170220	jmjdswap	NA	NA	5	water	None	ECA578	G	9	median.TOF	207
20170220	jmjdswap	NA	NA	5	water	None	N2	H	1	median.TOF	175
20170220	jmjdswap	NA	NA	5	water	None	CB4856	H	3	median.TOF	206.5
20170220	jmjdswap	NA	NA	6	bleomycin	water	N2	A	1	median.TOF	110
20170220	jmjdswap	NA	NA	6	bleomycin	water	ECA578	A	10	median.TOF	127.5
20170220	jmjdswap	NA	NA	6	bleomycin	water	ECA579	A	11	median.TOF	128
20170220	jmjdswap	NA	NA	6	bleomycin	water	N2	A	2	median.TOF	111
20170220	jmjdswap	NA	NA	6	bleomycin	water	CB4856	A	3	median.TOF	134
20170220	jmjdswap	NA	NA	6	bleomycin	water	CB4856	A	4	median.TOF	122
20170220	jmjdswap	NA	NA	6	bleomycin	water	ECA576	A	5	median.TOF	106.5
20170220	jmjdswap	NA	NA	6	bleomycin	water	ECA576	A	6	median.TOF	117.5
20170220	jmjdswap	NA	NA	6	bleomycin	water	ECA577	A	7	median.TOF	116.5
20170220	jmjdswap	NA	NA	6	bleomycin	water	ECA577	A	8	median.TOF	122
20170220	jmjdswap	NA	NA	6	bleomycin	water	ECA578	A	9	median.TOF	142
20170220	jmjdswap	NA	NA	6	bleomycin	water	ECA578	B	10	median.TOF	123
20170220	jmjdswap	NA	NA	6	bleomycin	water	ECA579	B	11	median.TOF	132
20170220	jmjdswap	NA	NA	6	bleomycin	water	ECA579	B	12	median.TOF	121
20170220	jmjdswap	NA	NA	6	bleomycin	water	CB4856	B	3	median.TOF	123.5
20170220	jmjdswap	NA	NA	6	bleomycin	water	ECA576	B	5	median.TOF	103
20170220	jmjdswap	NA	NA	6	bleomycin	water	ECA577	B	7	median.TOF	97.5
20170220	jmjdswap	NA	NA	6	bleomycin	water	ECA577	B	8	median.TOF	111
20170220	jmjdswap	NA	NA	6	bleomycin	water	ECA578	B	9	median.TOF	136
20170220	jmjdswap	NA	NA	6	bleomycin	water	N2	C	1	median.TOF	114
20170220	jmjdswap	NA	NA	6	bleomycin	water	ECA578	C	10	median.TOF	136.5
20170220	jmjdswap	NA	NA	6	bleomycin	water	ECA579	C	11	median.TOF	135
20170220	jmjdswap	NA	NA	6	bleomycin	water	ECA579	C	12	median.TOF	126
20170220	jmjdswap	NA	NA	6	bleomycin	water	N2	C	2	median.TOF	95
20170220	jmjdswap	NA	NA	6	bleomycin	water	CB4856	C	4	median.TOF	124
20170220	jmjdswap	NA	NA	6	bleomycin	water	ECA577	C	8	median.TOF	104.5
20170220	jmjdswap	NA	NA	6	bleomycin	water	ECA578	C	9	median.TOF	131
20170220	jmjdswap	NA	NA	6	bleomycin	water	N2	D	1	median.TOF	91.5
20170220	jmjdswap	NA	NA	6	bleomycin	water	ECA578	D	10	median.TOF	141.5
20170220	jmjdswap	NA	NA	6	bleomycin	water	ECA579	D	11	median.TOF	125
20170220	jmjdswap	NA	NA	6	bleomycin	water	ECA579	D	12	median.TOF	122
20170220	jmjdswap	NA	NA	6	bleomycin	water	N2	D	2	median.TOF	96
20170220	jmjdswap	NA	NA	6	bleomycin	water	CB4856	D	3	median.TOF	124
20170220	jmjdswap	NA	NA	6	bleomycin	water	ECA576	D	5	median.TOF	118
20170220	jmjdswap	NA	NA	6	bleomycin	water	ECA577	D	7	median.TOF	116
20170220	jmjdswap	NA	NA	6	bleomycin	water	ECA577	D	8	median.TOF	111
20170220	jmjdswap	NA	NA	6	bleomycin	water	ECA578	D	9	median.TOF	143
20170220	jmjdswap	NA	NA	6	bleomycin	water	N2	E	1	median.TOF	102.5
20170220	jmjdswap	NA	NA	6	bleomycin	water	ECA579	E	11	median.TOF	150
20170220	jmjdswap	NA	NA	6	bleomycin	water	CB4856	E	3	median.TOF	124
20170220	jmjdswap	NA	NA	6	bleomycin	water	CB4856	E	4	median.TOF	100.5
20170220	jmjdswap	NA	NA	6	bleomycin	water	ECA576	E	5	median.TOF	100
20170220	jmjdswap	NA	NA	6	bleomycin	water	ECA577	E	7	median.TOF	104.5
20170220	jmjdswap	NA	NA	6	bleomycin	water	ECA577	E	8	median.TOF	94
20170220	jmjdswap	NA	NA	6	bleomycin	water	ECA578	E	9	median.TOF	138.5
20170220	jmjdswap	NA	NA	6	bleomycin	water	N2	F	1	median.TOF	109.5
20170220	jmjdswap	NA	NA	6	bleomycin	water	ECA578	F	10	median.TOF	123
20170220	jmjdswap	NA	NA	6	bleomycin	water	ECA579	F	11	median.TOF	138
20170220	jmjdswap	NA	NA	6	bleomycin	water	N2	F	2	median.TOF	107.5
20170220	jmjdswap	NA	NA	6	bleomycin	water	CB4856	F	3	median.TOF	127
20170220	jmjdswap	NA	NA	6	bleomycin	water	CB4856	F	4	median.TOF	125.5
20170220	jmjdswap	NA	NA	6	bleomycin	water	ECA576	F	5	median.TOF	120
20170220	jmjdswap	NA	NA	6	bleomycin	water	ECA577	F	7	median.TOF	93
20170220	jmjdswap	NA	NA	6	bleomycin	water	ECA577	F	8	median.TOF	117
20170220	jmjdswap	NA	NA	6	bleomycin	water	ECA578	F	9	median.TOF	130
20170220	jmjdswap	NA	NA	6	bleomycin	water	N2	G	1	median.TOF	101.5
20170220	jmjdswap	NA	NA	6	bleomycin	water	N2	G	2	median.TOF	117
20170220	jmjdswap	NA	NA	6	bleomycin	water	CB4856	G	3	median.TOF	118
20170220	jmjdswap	NA	NA	6	bleomycin	water	ECA576	G	5	median.TOF	100.5
20170220	jmjdswap	NA	NA	6	bleomycin	water	ECA576	G	6	median.TOF	113
20170220	jmjdswap	NA	NA	6	bleomycin	water	ECA577	G	8	median.TOF	93
20170220	jmjdswap	NA	NA	6	bleomycin	water	ECA578	G	9	median.TOF	136
20170220	jmjdswap	NA	NA	6	bleomycin	water	N2	H	1	median.TOF	97
20170220	jmjdswap	NA	NA	6	bleomycin	water	ECA579	H	11	median.TOF	133
20170220	jmjdswap	NA	NA	6	bleomycin	water	ECA576	H	5	median.TOF	99
20170220	jmjdswap	NA	NA	6	bleomycin	water	ECA577	H	7	median.TOF	102
20170220	jmjdswap	NA	NA	1	water	None	ECA579	A	11	q75.TOF	286.75
20170220	jmjdswap	NA	NA	1	water	None	ECA576	A	6	q75.TOF	323
20170220	jmjdswap	NA	NA	1	water	None	ECA579	B	11	q75.TOF	299
20170220	jmjdswap	NA	NA	1	water	None	CB4856	B	4	q75.TOF	348.25
20170220	jmjdswap	NA	NA	1	water	None	ECA577	B	7	q75.TOF	305.5
20170220	jmjdswap	NA	NA	1	water	None	ECA578	C	10	q75.TOF	330
20170220	jmjdswap	NA	NA	1	water	None	ECA579	C	12	q75.TOF	345.5
20170220	jmjdswap	NA	NA	1	water	None	ECA576	C	6	q75.TOF	293.5
20170220	jmjdswap	NA	NA	1	water	None	ECA579	D	12	q75.TOF	317
20170220	jmjdswap	NA	NA	1	water	None	CB4856	D	3	q75.TOF	347.5
20170220	jmjdswap	NA	NA	1	water	None	CB4856	D	4	q75.TOF	343
20170220	jmjdswap	NA	NA	1	water	None	ECA576	D	5	q75.TOF	292.5
20170220	jmjdswap	NA	NA	1	water	None	ECA576	D	6	q75.TOF	336
20170220	jmjdswap	NA	NA	1	water	None	ECA577	D	7	q75.TOF	288.5
20170220	jmjdswap	NA	NA	1	water	None	ECA577	D	8	q75.TOF	331
20170220	jmjdswap	NA	NA	1	water	None	ECA578	E	10	q75.TOF	331.5
20170220	jmjdswap	NA	NA	1	water	None	ECA579	E	11	q75.TOF	325
20170220	jmjdswap	NA	NA	1	water	None	N2	E	2	q75.TOF	326.75
20170220	jmjdswap	NA	NA	1	water	None	ECA577	E	7	q75.TOF	338.75
20170220	jmjdswap	NA	NA	1	water	None	ECA578	E	9	q75.TOF	324.5
20170220	jmjdswap	NA	NA	1	water	None	ECA576	F	5	q75.TOF	323
20170220	jmjdswap	NA	NA	1	water	None	ECA578	F	9	q75.TOF	342
20170220	jmjdswap	NA	NA	1	water	None	ECA578	G	10	q75.TOF	309.5
20170220	jmjdswap	NA	NA	1	water	None	ECA579	G	11	q75.TOF	313
20170220	jmjdswap	NA	NA	1	water	None	CB4856	G	4	q75.TOF	309
20170220	jmjdswap	NA	NA	1	water	None	ECA576	G	6	q75.TOF	320
20170220	jmjdswap	NA	NA	1	water	None	ECA577	G	8	q75.TOF	315.5
20170220	jmjdswap	NA	NA	1	water	None	ECA578	G	9	q75.TOF	323.25
20170220	jmjdswap	NA	NA	1	water	None	ECA579	H	11	q75.TOF	334
20170220	jmjdswap	NA	NA	1	water	None	ECA577	H	7	q75.TOF	313.5
20170220	jmjdswap	NA	NA	2	bleomycin	water	ECA579	A	11	q75.TOF	181
20170220	jmjdswap	NA	NA	2	bleomycin	water	ECA579	A	12	q75.TOF	164.5
20170220	jmjdswap	NA	NA	2	bleomycin	water	CB4856	A	4	q75.TOF	173
20170220	jmjdswap	NA	NA	2	bleomycin	water	ECA576	A	5	q75.TOF	134
20170220	jmjdswap	NA	NA	2	bleomycin	water	ECA577	A	8	q75.TOF	148
20170220	jmjdswap	NA	NA	2	bleomycin	water	ECA578	A	9	q75.TOF	166
20170220	jmjdswap	NA	NA	2	bleomycin	water	N2	B	1	q75.TOF	135.5
20170220	jmjdswap	NA	NA	2	bleomycin	water	ECA579	B	12	q75.TOF	169.5
20170220	jmjdswap	NA	NA	2	bleomycin	water	CB4856	B	3	q75.TOF	181
20170220	jmjdswap	NA	NA	2	bleomycin	water	ECA576	B	5	q75.TOF	142.5
20170220	jmjdswap	NA	NA	2	bleomycin	water	ECA576	B	6	q75.TOF	153.5
20170220	jmjdswap	NA	NA	2	bleomycin	water	ECA577	B	7	q75.TOF	120.5
20170220	jmjdswap	NA	NA	2	bleomycin	water	ECA577	B	8	q75.TOF	154.5
20170220	jmjdswap	NA	NA	2	bleomycin	water	ECA578	B	9	q75.TOF	172
20170220	jmjdswap	NA	NA	2	bleomycin	water	N2	C	1	q75.TOF	152
20170220	jmjdswap	NA	NA	2	bleomycin	water	ECA579	C	11	q75.TOF	188.25
20170220	jmjdswap	NA	NA	2	bleomycin	water	ECA579	C	12	q75.TOF	184
20170220	jmjdswap	NA	NA	2	bleomycin	water	N2	C	2	q75.TOF	169
20170220	jmjdswap	NA	NA	2	bleomycin	water	ECA576	C	5	q75.TOF	161.25
20170220	jmjdswap	NA	NA	2	bleomycin	water	ECA577	C	7	q75.TOF	147.75
20170220	jmjdswap	NA	NA	2	bleomycin	water	ECA577	C	8	q75.TOF	154
20170220	jmjdswap	NA	NA	2	bleomycin	water	N2	D	1	q75.TOF	146
20170220	jmjdswap	NA	NA	2	bleomycin	water	ECA578	D	10	q75.TOF	144.75
20170220	jmjdswap	NA	NA	2	bleomycin	water	ECA579	D	11	q75.TOF	166.5
20170220	jmjdswap	NA	NA	2	bleomycin	water	N2	D	2	q75.TOF	152
20170220	jmjdswap	NA	NA	2	bleomycin	water	CB4856	D	3	q75.TOF	170.5
20170220	jmjdswap	NA	NA	2	bleomycin	water	CB4856	D	4	q75.TOF	146
20170220	jmjdswap	NA	NA	2	bleomycin	water	ECA577	D	7	q75.TOF	148
20170220	jmjdswap	NA	NA	2	bleomycin	water	ECA578	D	9	q75.TOF	180
20170220	jmjdswap	NA	NA	2	bleomycin	water	N2	E	1	q75.TOF	135
20170220	jmjdswap	NA	NA	2	bleomycin	water	ECA578	E	10	q75.TOF	180.5
20170220	jmjdswap	NA	NA	2	bleomycin	water	ECA579	E	11	q75.TOF	188
20170220	jmjdswap	NA	NA	2	bleomycin	water	ECA579	E	12	q75.TOF	178
20170220	jmjdswap	NA	NA	2	bleomycin	water	N2	E	2	q75.TOF	151
20170220	jmjdswap	NA	NA	2	bleomycin	water	ECA577	E	7	q75.TOF	154.75
20170220	jmjdswap	NA	NA	2	bleomycin	water	ECA579	F	11	q75.TOF	195
20170220	jmjdswap	NA	NA	2	bleomycin	water	CB4856	F	3	q75.TOF	181.75
20170220	jmjdswap	NA	NA	2	bleomycin	water	ECA577	F	7	q75.TOF	139.25
20170220	jmjdswap	NA	NA	2	bleomycin	water	ECA577	F	8	q75.TOF	157
20170220	jmjdswap	NA	NA	2	bleomycin	water	ECA578	F	9	q75.TOF	193
20170220	jmjdswap	NA	NA	2	bleomycin	water	ECA579	G	11	q75.TOF	149.5
20170220	jmjdswap	NA	NA	2	bleomycin	water	N2	G	2	q75.TOF	146
20170220	jmjdswap	NA	NA	2	bleomycin	water	CB4856	G	3	q75.TOF	177
20170220	jmjdswap	NA	NA	2	bleomycin	water	CB4856	G	4	q75.TOF	166
20170220	jmjdswap	NA	NA	2	bleomycin	water	ECA576	G	6	q75.TOF	140.75
20170220	jmjdswap	NA	NA	2	bleomycin	water	ECA577	G	8	q75.TOF	156.25
20170220	jmjdswap	NA	NA	2	bleomycin	water	N2	H	1	q75.TOF	142
20170220	jmjdswap	NA	NA	2	bleomycin	water	CB4856	H	3	q75.TOF	171
20170220	jmjdswap	NA	NA	2	bleomycin	water	ECA576	H	5	q75.TOF	145
20170220	jmjdswap	NA	NA	2	bleomycin	water	ECA577	H	7	q75.TOF	157.75
20170220	jmjdswap	NA	NA	2	bleomycin	water	ECA578	H	9	q75.TOF	167.25
20170220	jmjdswap	NA	NA	3	water	None	CB4856	A	4	q75.TOF	340.5
20170220	jmjdswap	NA	NA	3	water	None	ECA576	A	5	q75.TOF	319.25
20170220	jmjdswap	NA	NA	3	water	None	ECA576	A	6	q75.TOF	305
20170220	jmjdswap	NA	NA	3	water	None	ECA577	A	8	q75.TOF	302.5
20170220	jmjdswap	NA	NA	3	water	None	ECA578	A	9	q75.TOF	341.75
20170220	jmjdswap	NA	NA	3	water	None	ECA578	B	10	q75.TOF	357.75
20170220	jmjdswap	NA	NA	3	water	None	ECA579	B	11	q75.TOF	347
20170220	jmjdswap	NA	NA	3	water	None	N2	B	2	q75.TOF	314.75
20170220	jmjdswap	NA	NA	3	water	None	CB4856	B	3	q75.TOF	351.5
20170220	jmjdswap	NA	NA	3	water	None	ECA577	B	8	q75.TOF	307
20170220	jmjdswap	NA	NA	3	water	None	N2	C	1	q75.TOF	346
20170220	jmjdswap	NA	NA	3	water	None	ECA579	C	11	q75.TOF	347
20170220	jmjdswap	NA	NA	3	water	None	ECA579	C	12	q75.TOF	334.25
20170220	jmjdswap	NA	NA	3	water	None	CB4856	C	3	q75.TOF	361
20170220	jmjdswap	NA	NA	3	water	None	CB4856	C	4	q75.TOF	325.25
20170220	jmjdswap	NA	NA	3	water	None	N2	D	1	q75.TOF	363.25
20170220	jmjdswap	NA	NA	3	water	None	ECA579	D	11	q75.TOF	323.5
20170220	jmjdswap	NA	NA	3	water	None	N2	D	2	q75.TOF	335.25
20170220	jmjdswap	NA	NA	3	water	None	CB4856	D	3	q75.TOF	337
20170220	jmjdswap	NA	NA	3	water	None	ECA577	D	7	q75.TOF	319.5
20170220	jmjdswap	NA	NA	3	water	None	ECA578	E	10	q75.TOF	317.25
20170220	jmjdswap	NA	NA	3	water	None	ECA579	E	12	q75.TOF	367
20170220	jmjdswap	NA	NA	3	water	None	ECA576	E	5	q75.TOF	325
20170220	jmjdswap	NA	NA	3	water	None	ECA577	E	7	q75.TOF	312.5
20170220	jmjdswap	NA	NA	3	water	None	ECA578	E	9	q75.TOF	333.5
20170220	jmjdswap	NA	NA	3	water	None	N2	F	1	q75.TOF	349
20170220	jmjdswap	NA	NA	3	water	None	ECA578	F	10	q75.TOF	337.75
20170220	jmjdswap	NA	NA	3	water	None	ECA579	F	12	q75.TOF	354
20170220	jmjdswap	NA	NA	3	water	None	CB4856	F	3	q75.TOF	351.25
20170220	jmjdswap	NA	NA	3	water	None	CB4856	F	4	q75.TOF	347
20170220	jmjdswap	NA	NA	3	water	None	ECA576	F	5	q75.TOF	346.75
20170220	jmjdswap	NA	NA	3	water	None	ECA577	F	7	q75.TOF	314
20170220	jmjdswap	NA	NA	3	water	None	ECA578	F	9	q75.TOF	347
20170220	jmjdswap	NA	NA	3	water	None	ECA579	G	11	q75.TOF	364
20170220	jmjdswap	NA	NA	3	water	None	ECA579	G	12	q75.TOF	367
20170220	jmjdswap	NA	NA	3	water	None	ECA576	G	6	q75.TOF	323
20170220	jmjdswap	NA	NA	3	water	None	ECA577	G	7	q75.TOF	310
20170220	jmjdswap	NA	NA	3	water	None	N2	H	1	q75.TOF	337
20170220	jmjdswap	NA	NA	3	water	None	ECA577	H	7	q75.TOF	323
20170220	jmjdswap	NA	NA	3	water	None	ECA578	H	9	q75.TOF	342
20170220	jmjdswap	NA	NA	4	bleomycin	water	ECA579	A	12	q75.TOF	142.75
20170220	jmjdswap	NA	NA	4	bleomycin	water	CB4856	A	4	q75.TOF	143
20170220	jmjdswap	NA	NA	4	bleomycin	water	ECA576	A	5	q75.TOF	142.5
20170220	jmjdswap	NA	NA	4	bleomycin	water	ECA576	A	6	q75.TOF	122
20170220	jmjdswap	NA	NA	4	bleomycin	water	ECA578	A	9	q75.TOF	147.25
20170220	jmjdswap	NA	NA	4	bleomycin	water	ECA578	B	10	q75.TOF	133
20170220	jmjdswap	NA	NA	4	bleomycin	water	ECA579	B	11	q75.TOF	136.75
20170220	jmjdswap	NA	NA	4	bleomycin	water	N2	B	2	q75.TOF	143.75
20170220	jmjdswap	NA	NA	4	bleomycin	water	ECA576	B	5	q75.TOF	143
20170220	jmjdswap	NA	NA	4	bleomycin	water	ECA577	B	8	q75.TOF	112.5
20170220	jmjdswap	NA	NA	4	bleomycin	water	ECA578	B	9	q75.TOF	149
20170220	jmjdswap	NA	NA	4	bleomycin	water	ECA578	C	10	q75.TOF	144
20170220	jmjdswap	NA	NA	4	bleomycin	water	ECA579	C	11	q75.TOF	149
20170220	jmjdswap	NA	NA	4	bleomycin	water	CB4856	C	3	q75.TOF	144.25
20170220	jmjdswap	NA	NA	4	bleomycin	water	ECA576	C	5	q75.TOF	134
20170220	jmjdswap	NA	NA	4	bleomycin	water	ECA576	C	6	q75.TOF	139.75
20170220	jmjdswap	NA	NA	4	bleomycin	water	ECA577	C	8	q75.TOF	123
20170220	jmjdswap	NA	NA	4	bleomycin	water	ECA578	C	9	q75.TOF	165
20170220	jmjdswap	NA	NA	4	bleomycin	water	ECA579	D	11	q75.TOF	151
20170220	jmjdswap	NA	NA	4	bleomycin	water	N2	D	2	q75.TOF	123
20170220	jmjdswap	NA	NA	4	bleomycin	water	CB4856	D	4	q75.TOF	142
20170220	jmjdswap	NA	NA	4	bleomycin	water	ECA576	D	6	q75.TOF	137.25
20170220	jmjdswap	NA	NA	4	bleomycin	water	ECA577	D	7	q75.TOF	129.75
20170220	jmjdswap	NA	NA	4	bleomycin	water	ECA577	D	8	q75.TOF	128.25
20170220	jmjdswap	NA	NA	4	bleomycin	water	ECA578	D	9	q75.TOF	138.5
20170220	jmjdswap	NA	NA	4	bleomycin	water	ECA578	E	10	q75.TOF	154
20170220	jmjdswap	NA	NA	4	bleomycin	water	ECA579	E	11	q75.TOF	151
20170220	jmjdswap	NA	NA	4	bleomycin	water	ECA579	E	12	q75.TOF	137
20170220	jmjdswap	NA	NA	4	bleomycin	water	N2	E	2	q75.TOF	122
20170220	jmjdswap	NA	NA	4	bleomycin	water	CB4856	E	4	q75.TOF	157
20170220	jmjdswap	NA	NA	4	bleomycin	water	ECA576	E	5	q75.TOF	136
20170220	jmjdswap	NA	NA	4	bleomycin	water	ECA577	E	7	q75.TOF	130
20170220	jmjdswap	NA	NA	4	bleomycin	water	ECA577	E	8	q75.TOF	114.5
20170220	jmjdswap	NA	NA	4	bleomycin	water	ECA578	E	9	q75.TOF	157
20170220	jmjdswap	NA	NA	4	bleomycin	water	ECA579	F	12	q75.TOF	160.5
20170220	jmjdswap	NA	NA	4	bleomycin	water	CB4856	F	3	q75.TOF	150
20170220	jmjdswap	NA	NA	4	bleomycin	water	CB4856	F	4	q75.TOF	144
20170220	jmjdswap	NA	NA	4	bleomycin	water	ECA576	F	5	q75.TOF	129.25
20170220	jmjdswap	NA	NA	4	bleomycin	water	ECA578	F	9	q75.TOF	159.5
20170220	jmjdswap	NA	NA	4	bleomycin	water	N2	G	2	q75.TOF	146.5
20170220	jmjdswap	NA	NA	4	bleomycin	water	CB4856	G	3	q75.TOF	155.75
20170220	jmjdswap	NA	NA	4	bleomycin	water	ECA576	G	5	q75.TOF	129.5
20170220	jmjdswap	NA	NA	4	bleomycin	water	ECA578	G	9	q75.TOF	135.25
20170220	jmjdswap	NA	NA	4	bleomycin	water	ECA576	H	5	q75.TOF	137
20170220	jmjdswap	NA	NA	4	bleomycin	water	ECA577	H	7	q75.TOF	142.5
20170220	jmjdswap	NA	NA	5	water	None	ECA578	A	10	q75.TOF	330.5
20170220	jmjdswap	NA	NA	5	water	None	ECA579	A	12	q75.TOF	360
20170220	jmjdswap	NA	NA	5	water	None	CB4856	A	4	q75.TOF	362.25
20170220	jmjdswap	NA	NA	5	water	None	ECA576	A	5	q75.TOF	321
20170220	jmjdswap	NA	NA	5	water	None	ECA576	A	6	q75.TOF	310.5
20170220	jmjdswap	NA	NA	5	water	None	ECA578	A	9	q75.TOF	332
20170220	jmjdswap	NA	NA	5	water	None	ECA579	B	12	q75.TOF	309
20170220	jmjdswap	NA	NA	5	water	None	N2	B	2	q75.TOF	359.5
20170220	jmjdswap	NA	NA	5	water	None	CB4856	B	3	q75.TOF	330
20170220	jmjdswap	NA	NA	5	water	None	CB4856	B	4	q75.TOF	369
20170220	jmjdswap	NA	NA	5	water	None	ECA576	B	5	q75.TOF	311
20170220	jmjdswap	NA	NA	5	water	None	ECA577	B	7	q75.TOF	294.75
20170220	jmjdswap	NA	NA	5	water	None	ECA577	B	8	q75.TOF	311.5
20170220	jmjdswap	NA	NA	5	water	None	ECA578	B	9	q75.TOF	327
20170220	jmjdswap	NA	NA	5	water	None	N2	C	1	q75.TOF	353.5
20170220	jmjdswap	NA	NA	5	water	None	ECA578	C	10	q75.TOF	339.25
20170220	jmjdswap	NA	NA	5	water	None	ECA579	C	12	q75.TOF	329.25
20170220	jmjdswap	NA	NA	5	water	None	CB4856	C	3	q75.TOF	359
20170220	jmjdswap	NA	NA	5	water	None	CB4856	C	4	q75.TOF	395.75
20170220	jmjdswap	NA	NA	5	water	None	ECA576	C	5	q75.TOF	308
20170220	jmjdswap	NA	NA	5	water	None	ECA577	C	7	q75.TOF	307.5
20170220	jmjdswap	NA	NA	5	water	None	ECA577	C	8	q75.TOF	312.5
20170220	jmjdswap	NA	NA	5	water	None	ECA578	C	9	q75.TOF	335
20170220	jmjdswap	NA	NA	5	water	None	N2	D	1	q75.TOF	328
20170220	jmjdswap	NA	NA	5	water	None	ECA578	D	10	q75.TOF	343.5
20170220	jmjdswap	NA	NA	5	water	None	ECA579	D	12	q75.TOF	321.75
20170220	jmjdswap	NA	NA	5	water	None	N2	D	2	q75.TOF	346
20170220	jmjdswap	NA	NA	5	water	None	ECA576	D	5	q75.TOF	311
20170220	jmjdswap	NA	NA	5	water	None	ECA576	D	6	q75.TOF	313
20170220	jmjdswap	NA	NA	5	water	None	ECA577	D	7	q75.TOF	307
20170220	jmjdswap	NA	NA	5	water	None	ECA577	D	8	q75.TOF	332
20170220	jmjdswap	NA	NA	5	water	None	ECA578	D	9	q75.TOF	336.5
20170220	jmjdswap	NA	NA	5	water	None	ECA579	E	12	q75.TOF	343.5
20170220	jmjdswap	NA	NA	5	water	None	N2	E	2	q75.TOF	348
20170220	jmjdswap	NA	NA	5	water	None	CB4856	E	3	q75.TOF	330
20170220	jmjdswap	NA	NA	5	water	None	ECA576	E	5	q75.TOF	354
20170220	jmjdswap	NA	NA	5	water	None	ECA577	E	8	q75.TOF	308.5
20170220	jmjdswap	NA	NA	5	water	None	ECA578	E	9	q75.TOF	326
20170220	jmjdswap	NA	NA	5	water	None	ECA579	F	11	q75.TOF	344
20170220	jmjdswap	NA	NA	5	water	None	ECA579	F	12	q75.TOF	297
20170220	jmjdswap	NA	NA	5	water	None	N2	F	2	q75.TOF	323
20170220	jmjdswap	NA	NA	5	water	None	CB4856	F	3	q75.TOF	380.5
20170220	jmjdswap	NA	NA	5	water	None	CB4856	F	4	q75.TOF	352
20170220	jmjdswap	NA	NA	5	water	None	ECA576	F	6	q75.TOF	322.75
20170220	jmjdswap	NA	NA	5	water	None	ECA577	F	7	q75.TOF	317
20170220	jmjdswap	NA	NA	5	water	None	ECA577	F	8	q75.TOF	285
20170220	jmjdswap	NA	NA	5	water	None	ECA578	F	9	q75.TOF	327
20170220	jmjdswap	NA	NA	5	water	None	ECA578	G	10	q75.TOF	325.25
20170220	jmjdswap	NA	NA	5	water	None	ECA579	G	11	q75.TOF	339.75
20170220	jmjdswap	NA	NA	5	water	None	ECA579	G	12	q75.TOF	314
20170220	jmjdswap	NA	NA	5	water	None	N2	G	2	q75.TOF	333
20170220	jmjdswap	NA	NA	5	water	None	ECA576	G	5	q75.TOF	296
20170220	jmjdswap	NA	NA	5	water	None	ECA576	G	6	q75.TOF	312.75
20170220	jmjdswap	NA	NA	5	water	None	ECA577	G	8	q75.TOF	298.25
20170220	jmjdswap	NA	NA	5	water	None	ECA578	G	9	q75.TOF	357.5
20170220	jmjdswap	NA	NA	5	water	None	N2	H	1	q75.TOF	341.5
20170220	jmjdswap	NA	NA	5	water	None	CB4856	H	3	q75.TOF	371.25
20170220	jmjdswap	NA	NA	6	bleomycin	water	N2	A	1	q75.TOF	142
20170220	jmjdswap	NA	NA	6	bleomycin	water	ECA578	A	10	q75.TOF	182.25
20170220	jmjdswap	NA	NA	6	bleomycin	water	ECA579	A	11	q75.TOF	164
20170220	jmjdswap	NA	NA	6	bleomycin	water	N2	A	2	q75.TOF	151
20170220	jmjdswap	NA	NA	6	bleomycin	water	CB4856	A	3	q75.TOF	169.75
20170220	jmjdswap	NA	NA	6	bleomycin	water	CB4856	A	4	q75.TOF	168.5
20170220	jmjdswap	NA	NA	6	bleomycin	water	ECA576	A	5	q75.TOF	160.25
20170220	jmjdswap	NA	NA	6	bleomycin	water	ECA576	A	6	q75.TOF	159
20170220	jmjdswap	NA	NA	6	bleomycin	water	ECA577	A	7	q75.TOF	149.5
20170220	jmjdswap	NA	NA	6	bleomycin	water	ECA577	A	8	q75.TOF	159
20170220	jmjdswap	NA	NA	6	bleomycin	water	ECA578	A	9	q75.TOF	181
20170220	jmjdswap	NA	NA	6	bleomycin	water	ECA578	B	10	q75.TOF	160
20170220	jmjdswap	NA	NA	6	bleomycin	water	ECA579	B	11	q75.TOF	170
20170220	jmjdswap	NA	NA	6	bleomycin	water	ECA579	B	12	q75.TOF	154
20170220	jmjdswap	NA	NA	6	bleomycin	water	CB4856	B	3	q75.TOF	167.25
20170220	jmjdswap	NA	NA	6	bleomycin	water	ECA576	B	5	q75.TOF	136
20170220	jmjdswap	NA	NA	6	bleomycin	water	ECA577	B	7	q75.TOF	130.75
20170220	jmjdswap	NA	NA	6	bleomycin	water	ECA577	B	8	q75.TOF	148
20170220	jmjdswap	NA	NA	6	bleomycin	water	ECA578	B	9	q75.TOF	170.25
20170220	jmjdswap	NA	NA	6	bleomycin	water	N2	C	1	q75.TOF	148
20170220	jmjdswap	NA	NA	6	bleomycin	water	ECA578	C	10	q75.TOF	180
20170220	jmjdswap	NA	NA	6	bleomycin	water	ECA579	C	11	q75.TOF	177.75
20170220	jmjdswap	NA	NA	6	bleomycin	water	ECA579	C	12	q75.TOF	170
20170220	jmjdswap	NA	NA	6	bleomycin	water	N2	C	2	q75.TOF	136
20170220	jmjdswap	NA	NA	6	bleomycin	water	CB4856	C	4	q75.TOF	165.5
20170220	jmjdswap	NA	NA	6	bleomycin	water	ECA577	C	8	q75.TOF	136.25
20170220	jmjdswap	NA	NA	6	bleomycin	water	ECA578	C	9	q75.TOF	173
20170220	jmjdswap	NA	NA	6	bleomycin	water	N2	D	1	q75.TOF	122
20170220	jmjdswap	NA	NA	6	bleomycin	water	ECA578	D	10	q75.TOF	187
20170220	jmjdswap	NA	NA	6	bleomycin	water	ECA579	D	11	q75.TOF	170
20170220	jmjdswap	NA	NA	6	bleomycin	water	ECA579	D	12	q75.TOF	167
20170220	jmjdswap	NA	NA	6	bleomycin	water	N2	D	2	q75.TOF	129.5
20170220	jmjdswap	NA	NA	6	bleomycin	water	CB4856	D	3	q75.TOF	168
20170220	jmjdswap	NA	NA	6	bleomycin	water	ECA576	D	5	q75.TOF	153
20170220	jmjdswap	NA	NA	6	bleomycin	water	ECA577	D	7	q75.TOF	160
20170220	jmjdswap	NA	NA	6	bleomycin	water	ECA577	D	8	q75.TOF	142
20170220	jmjdswap	NA	NA	6	bleomycin	water	ECA578	D	9	q75.TOF	179
20170220	jmjdswap	NA	NA	6	bleomycin	water	N2	E	1	q75.TOF	135.25
20170220	jmjdswap	NA	NA	6	bleomycin	water	ECA579	E	11	q75.TOF	200
20170220	jmjdswap	NA	NA	6	bleomycin	water	CB4856	E	3	q75.TOF	156.5
20170220	jmjdswap	NA	NA	6	bleomycin	water	CB4856	E	4	q75.TOF	136.75
20170220	jmjdswap	NA	NA	6	bleomycin	water	ECA576	E	5	q75.TOF	133
20170220	jmjdswap	NA	NA	6	bleomycin	water	ECA577	E	7	q75.TOF	146.75
20170220	jmjdswap	NA	NA	6	bleomycin	water	ECA577	E	8	q75.TOF	128
20170220	jmjdswap	NA	NA	6	bleomycin	water	ECA578	E	9	q75.TOF	173.5
20170220	jmjdswap	NA	NA	6	bleomycin	water	N2	F	1	q75.TOF	148.5
20170220	jmjdswap	NA	NA	6	bleomycin	water	ECA578	F	10	q75.TOF	173
20170220	jmjdswap	NA	NA	6	bleomycin	water	ECA579	F	11	q75.TOF	177
20170220	jmjdswap	NA	NA	6	bleomycin	water	N2	F	2	q75.TOF	146.25
20170220	jmjdswap	NA	NA	6	bleomycin	water	CB4856	F	3	q75.TOF	168
20170220	jmjdswap	NA	NA	6	bleomycin	water	CB4856	F	4	q75.TOF	170.25
20170220	jmjdswap	NA	NA	6	bleomycin	water	ECA576	F	5	q75.TOF	150
20170220	jmjdswap	NA	NA	6	bleomycin	water	ECA577	F	7	q75.TOF	117.75
20170220	jmjdswap	NA	NA	6	bleomycin	water	ECA577	F	8	q75.TOF	150.75
20170220	jmjdswap	NA	NA	6	bleomycin	water	ECA578	F	9	q75.TOF	176.25
20170220	jmjdswap	NA	NA	6	bleomycin	water	N2	G	1	q75.TOF	126.5
20170220	jmjdswap	NA	NA	6	bleomycin	water	N2	G	2	q75.TOF	152.25
20170220	jmjdswap	NA	NA	6	bleomycin	water	CB4856	G	3	q75.TOF	154
20170220	jmjdswap	NA	NA	6	bleomycin	water	ECA576	G	5	q75.TOF	145
20170220	jmjdswap	NA	NA	6	bleomycin	water	ECA576	G	6	q75.TOF	145.75
20170220	jmjdswap	NA	NA	6	bleomycin	water	ECA577	G	8	q75.TOF	135
20170220	jmjdswap	NA	NA	6	bleomycin	water	ECA578	G	9	q75.TOF	159
20170220	jmjdswap	NA	NA	6	bleomycin	water	N2	H	1	q75.TOF	126.5
20170220	jmjdswap	NA	NA	6	bleomycin	water	ECA579	H	11	q75.TOF	171.75
20170220	jmjdswap	NA	NA	6	bleomycin	water	ECA576	H	5	q75.TOF	142.5
20170220	jmjdswap	NA	NA	6	bleomycin	water	ECA577	H	7	q75.TOF	145.5
20170220	jmjdswap	NA	NA	1	water	None	ECA579	A	11	q90.TOF	387.3
20170220	jmjdswap	NA	NA	1	water	None	ECA576	A	6	q90.TOF	389
20170220	jmjdswap	NA	NA	1	water	None	ECA579	B	11	q90.TOF	402.9
20170220	jmjdswap	NA	NA	1	water	None	CB4856	B	4	q90.TOF	469.3
20170220	jmjdswap	NA	NA	1	water	None	ECA577	B	7	q90.TOF	422.7
20170220	jmjdswap	NA	NA	1	water	None	ECA578	C	10	q90.TOF	463
20170220	jmjdswap	NA	NA	1	water	None	ECA579	C	12	q90.TOF	436.4
20170220	jmjdswap	NA	NA	1	water	None	ECA576	C	6	q90.TOF	390
20170220	jmjdswap	NA	NA	1	water	None	ECA579	D	12	q90.TOF	414.9
20170220	jmjdswap	NA	NA	1	water	None	CB4856	D	3	q90.TOF	435
20170220	jmjdswap	NA	NA	1	water	None	CB4856	D	4	q90.TOF	444.8
20170220	jmjdswap	NA	NA	1	water	None	ECA576	D	5	q90.TOF	405
20170220	jmjdswap	NA	NA	1	water	None	ECA576	D	6	q90.TOF	428.5
20170220	jmjdswap	NA	NA	1	water	None	ECA577	D	7	q90.TOF	382.3
20170220	jmjdswap	NA	NA	1	water	None	ECA577	D	8	q90.TOF	396
20170220	jmjdswap	NA	NA	1	water	None	ECA578	D	9	q90.TOF	417.4
20170220	jmjdswap	NA	NA	1	water	None	ECA578	E	10	q90.TOF	418
20170220	jmjdswap	NA	NA	1	water	None	ECA579	E	11	q90.TOF	456
20170220	jmjdswap	NA	NA	1	water	None	N2	E	2	q90.TOF	419
20170220	jmjdswap	NA	NA	1	water	None	ECA577	E	7	q90.TOF	418.1
20170220	jmjdswap	NA	NA	1	water	None	ECA578	E	9	q90.TOF	454
20170220	jmjdswap	NA	NA	1	water	None	ECA576	F	5	q90.TOF	393.6
20170220	jmjdswap	NA	NA	1	water	None	ECA578	F	9	q90.TOF	459.7
20170220	jmjdswap	NA	NA	1	water	None	ECA578	G	10	q90.TOF	422.5
20170220	jmjdswap	NA	NA	1	water	None	ECA579	G	11	q90.TOF	411.2
20170220	jmjdswap	NA	NA	1	water	None	CB4856	G	4	q90.TOF	486.9
20170220	jmjdswap	NA	NA	1	water	None	ECA576	G	5	q90.TOF	415
20170220	jmjdswap	NA	NA	1	water	None	ECA576	G	6	q90.TOF	394.5
20170220	jmjdswap	NA	NA	1	water	None	ECA577	G	8	q90.TOF	406.4
20170220	jmjdswap	NA	NA	1	water	None	ECA578	G	9	q90.TOF	454.4
20170220	jmjdswap	NA	NA	1	water	None	ECA579	H	11	q90.TOF	458
20170220	jmjdswap	NA	NA	1	water	None	ECA577	H	7	q90.TOF	398.5
20170220	jmjdswap	NA	NA	2	bleomycin	water	ECA579	A	11	q90.TOF	213
20170220	jmjdswap	NA	NA	2	bleomycin	water	ECA579	A	12	q90.TOF	206
20170220	jmjdswap	NA	NA	2	bleomycin	water	CB4856	A	4	q90.TOF	209.8
20170220	jmjdswap	NA	NA	2	bleomycin	water	ECA576	A	5	q90.TOF	178.1
20170220	jmjdswap	NA	NA	2	bleomycin	water	ECA577	A	7	q90.TOF	181.6
20170220	jmjdswap	NA	NA	2	bleomycin	water	ECA577	A	8	q90.TOF	182.2
20170220	jmjdswap	NA	NA	2	bleomycin	water	ECA578	A	9	q90.TOF	201
20170220	jmjdswap	NA	NA	2	bleomycin	water	N2	B	1	q90.TOF	175
20170220	jmjdswap	NA	NA	2	bleomycin	water	ECA579	B	12	q90.TOF	227.9
20170220	jmjdswap	NA	NA	2	bleomycin	water	CB4856	B	3	q90.TOF	213
20170220	jmjdswap	NA	NA	2	bleomycin	water	ECA576	B	5	q90.TOF	194.1
20170220	jmjdswap	NA	NA	2	bleomycin	water	ECA576	B	6	q90.TOF	183.8
20170220	jmjdswap	NA	NA	2	bleomycin	water	ECA577	B	7	q90.TOF	164.4
20170220	jmjdswap	NA	NA	2	bleomycin	water	ECA577	B	8	q90.TOF	189
20170220	jmjdswap	NA	NA	2	bleomycin	water	ECA578	B	9	q90.TOF	210.6
20170220	jmjdswap	NA	NA	2	bleomycin	water	N2	C	1	q90.TOF	182.5
20170220	jmjdswap	NA	NA	2	bleomycin	water	ECA579	C	11	q90.TOF	223.7
20170220	jmjdswap	NA	NA	2	bleomycin	water	ECA579	C	12	q90.TOF	215.2
20170220	jmjdswap	NA	NA	2	bleomycin	water	N2	C	2	q90.TOF	222
20170220	jmjdswap	NA	NA	2	bleomycin	water	ECA577	C	7	q90.TOF	188.9
20170220	jmjdswap	NA	NA	2	bleomycin	water	ECA577	C	8	q90.TOF	187
20170220	jmjdswap	NA	NA	2	bleomycin	water	N2	D	1	q90.TOF	175.6
20170220	jmjdswap	NA	NA	2	bleomycin	water	ECA578	D	10	q90.TOF	175.8
20170220	jmjdswap	NA	NA	2	bleomycin	water	ECA579	D	11	q90.TOF	211.4
20170220	jmjdswap	NA	NA	2	bleomycin	water	N2	D	2	q90.TOF	187
20170220	jmjdswap	NA	NA	2	bleomycin	water	CB4856	D	3	q90.TOF	219
20170220	jmjdswap	NA	NA	2	bleomycin	water	CB4856	D	4	q90.TOF	183
20170220	jmjdswap	NA	NA	2	bleomycin	water	ECA577	D	7	q90.TOF	175
20170220	jmjdswap	NA	NA	2	bleomycin	water	ECA578	D	9	q90.TOF	224.3
20170220	jmjdswap	NA	NA	2	bleomycin	water	N2	E	1	q90.TOF	163
20170220	jmjdswap	NA	NA	2	bleomycin	water	ECA578	E	10	q90.TOF	209.2
20170220	jmjdswap	NA	NA	2	bleomycin	water	ECA579	E	11	q90.TOF	230.8
20170220	jmjdswap	NA	NA	2	bleomycin	water	ECA579	E	12	q90.TOF	223.6
20170220	jmjdswap	NA	NA	2	bleomycin	water	N2	E	2	q90.TOF	180.6
20170220	jmjdswap	NA	NA	2	bleomycin	water	ECA576	E	5	q90.TOF	209
20170220	jmjdswap	NA	NA	2	bleomycin	water	ECA577	E	7	q90.TOF	194.7
20170220	jmjdswap	NA	NA	2	bleomycin	water	ECA579	F	11	q90.TOF	218.6
20170220	jmjdswap	NA	NA	2	bleomycin	water	CB4856	F	3	q90.TOF	219.6
20170220	jmjdswap	NA	NA	2	bleomycin	water	ECA576	F	5	q90.TOF	203.2
20170220	jmjdswap	NA	NA	2	bleomycin	water	ECA577	F	7	q90.TOF	167.5
20170220	jmjdswap	NA	NA	2	bleomycin	water	ECA577	F	8	q90.TOF	189.8
20170220	jmjdswap	NA	NA	2	bleomycin	water	ECA578	F	9	q90.TOF	232
20170220	jmjdswap	NA	NA	2	bleomycin	water	ECA579	G	11	q90.TOF	185
20170220	jmjdswap	NA	NA	2	bleomycin	water	N2	G	2	q90.TOF	184
20170220	jmjdswap	NA	NA	2	bleomycin	water	CB4856	G	3	q90.TOF	216
20170220	jmjdswap	NA	NA	2	bleomycin	water	CB4856	G	4	q90.TOF	203.8
20170220	jmjdswap	NA	NA	2	bleomycin	water	ECA576	G	6	q90.TOF	199
20170220	jmjdswap	NA	NA	2	bleomycin	water	ECA577	G	8	q90.TOF	205.6
20170220	jmjdswap	NA	NA	2	bleomycin	water	N2	H	1	q90.TOF	177.5
20170220	jmjdswap	NA	NA	2	bleomycin	water	ECA579	H	11	q90.TOF	164.2
20170220	jmjdswap	NA	NA	2	bleomycin	water	CB4856	H	3	q90.TOF	213.3
20170220	jmjdswap	NA	NA	2	bleomycin	water	ECA576	H	5	q90.TOF	164.5
20170220	jmjdswap	NA	NA	2	bleomycin	water	ECA577	H	7	q90.TOF	189.8
20170220	jmjdswap	NA	NA	2	bleomycin	water	ECA578	H	9	q90.TOF	206.2
20170220	jmjdswap	NA	NA	3	water	None	CB4856	A	4	q90.TOF	448.3
20170220	jmjdswap	NA	NA	3	water	None	ECA576	A	5	q90.TOF	387.5
20170220	jmjdswap	NA	NA	3	water	None	ECA576	A	6	q90.TOF	369.2
20170220	jmjdswap	NA	NA	3	water	None	ECA577	A	8	q90.TOF	365
20170220	jmjdswap	NA	NA	3	water	None	ECA578	A	9	q90.TOF	484.5
20170220	jmjdswap	NA	NA	3	water	None	ECA578	B	10	q90.TOF	472
20170220	jmjdswap	NA	NA	3	water	None	ECA579	B	11	q90.TOF	451.8
20170220	jmjdswap	NA	NA	3	water	None	N2	B	2	q90.TOF	405.4
20170220	jmjdswap	NA	NA	3	water	None	CB4856	B	3	q90.TOF	420
20170220	jmjdswap	NA	NA	3	water	None	ECA577	B	8	q90.TOF	384.5
20170220	jmjdswap	NA	NA	3	water	None	N2	C	1	q90.TOF	426.6
20170220	jmjdswap	NA	NA	3	water	None	ECA579	C	11	q90.TOF	453
20170220	jmjdswap	NA	NA	3	water	None	ECA579	C	12	q90.TOF	465.7
20170220	jmjdswap	NA	NA	3	water	None	CB4856	C	3	q90.TOF	453.2
20170220	jmjdswap	NA	NA	3	water	None	CB4856	C	4	q90.TOF	433.8
20170220	jmjdswap	NA	NA	3	water	None	ECA577	C	8	q90.TOF	363.4
20170220	jmjdswap	NA	NA	3	water	None	N2	D	1	q90.TOF	439.5
20170220	jmjdswap	NA	NA	3	water	None	ECA579	D	11	q90.TOF	460.9
20170220	jmjdswap	NA	NA	3	water	None	N2	D	2	q90.TOF	411.3
20170220	jmjdswap	NA	NA	3	water	None	CB4856	D	3	q90.TOF	440.6
20170220	jmjdswap	NA	NA	3	water	None	ECA577	D	7	q90.TOF	388.4
20170220	jmjdswap	NA	NA	3	water	None	ECA578	E	10	q90.TOF	460.3
20170220	jmjdswap	NA	NA	3	water	None	ECA579	E	12	q90.TOF	518.4
20170220	jmjdswap	NA	NA	3	water	None	ECA576	E	5	q90.TOF	412.9
20170220	jmjdswap	NA	NA	3	water	None	ECA577	E	7	q90.TOF	394.2
20170220	jmjdswap	NA	NA	3	water	None	ECA578	E	9	q90.TOF	447
20170220	jmjdswap	NA	NA	3	water	None	N2	F	1	q90.TOF	419
20170220	jmjdswap	NA	NA	3	water	None	ECA578	F	10	q90.TOF	466.5
20170220	jmjdswap	NA	NA	3	water	None	ECA579	F	11	q90.TOF	481
20170220	jmjdswap	NA	NA	3	water	None	ECA579	F	12	q90.TOF	472
20170220	jmjdswap	NA	NA	3	water	None	CB4856	F	3	q90.TOF	459.8
20170220	jmjdswap	NA	NA	3	water	None	CB4856	F	4	q90.TOF	461.8
20170220	jmjdswap	NA	NA	3	water	None	ECA576	F	5	q90.TOF	418.7
20170220	jmjdswap	NA	NA	3	water	None	ECA577	F	7	q90.TOF	404
20170220	jmjdswap	NA	NA	3	water	None	ECA578	F	9	q90.TOF	468
20170220	jmjdswap	NA	NA	3	water	None	ECA579	G	11	q90.TOF	482
20170220	jmjdswap	NA	NA	3	water	None	ECA579	G	12	q90.TOF	478
20170220	jmjdswap	NA	NA	3	water	None	ECA576	G	6	q90.TOF	396
20170220	jmjdswap	NA	NA	3	water	None	ECA577	G	7	q90.TOF	390
20170220	jmjdswap	NA	NA	3	water	None	N2	H	1	q90.TOF	424.1
20170220	jmjdswap	NA	NA	3	water	None	ECA577	H	7	q90.TOF	396.7
20170220	jmjdswap	NA	NA	3	water	None	ECA578	H	9	q90.TOF	476.5
20170220	jmjdswap	NA	NA	4	bleomycin	water	ECA579	A	12	q90.TOF	178.9
20170220	jmjdswap	NA	NA	4	bleomycin	water	CB4856	A	4	q90.TOF	166.4
20170220	jmjdswap	NA	NA	4	bleomycin	water	ECA576	A	5	q90.TOF	174.8
20170220	jmjdswap	NA	NA	4	bleomycin	water	ECA576	A	6	q90.TOF	174.8
20170220	jmjdswap	NA	NA	4	bleomycin	water	ECA578	A	9	q90.TOF	195.1
20170220	jmjdswap	NA	NA	4	bleomycin	water	ECA578	B	10	q90.TOF	165.6
20170220	jmjdswap	NA	NA	4	bleomycin	water	ECA579	B	11	q90.TOF	170.9
20170220	jmjdswap	NA	NA	4	bleomycin	water	N2	B	2	q90.TOF	166.5
20170220	jmjdswap	NA	NA	4	bleomycin	water	ECA576	B	5	q90.TOF	175.4
20170220	jmjdswap	NA	NA	4	bleomycin	water	ECA578	B	9	q90.TOF	178.6
20170220	jmjdswap	NA	NA	4	bleomycin	water	ECA578	C	10	q90.TOF	182.6
20170220	jmjdswap	NA	NA	4	bleomycin	water	ECA579	C	11	q90.TOF	183.7
20170220	jmjdswap	NA	NA	4	bleomycin	water	CB4856	C	3	q90.TOF	174.3
20170220	jmjdswap	NA	NA	4	bleomycin	water	ECA576	C	5	q90.TOF	172.4
20170220	jmjdswap	NA	NA	4	bleomycin	water	ECA576	C	6	q90.TOF	172.8
20170220	jmjdswap	NA	NA	4	bleomycin	water	ECA577	C	8	q90.TOF	173.8
20170220	jmjdswap	NA	NA	4	bleomycin	water	ECA578	C	9	q90.TOF	200
20170220	jmjdswap	NA	NA	4	bleomycin	water	ECA579	D	11	q90.TOF	182
20170220	jmjdswap	NA	NA	4	bleomycin	water	N2	D	2	q90.TOF	166
20170220	jmjdswap	NA	NA	4	bleomycin	water	CB4856	D	4	q90.TOF	176.6
20170220	jmjdswap	NA	NA	4	bleomycin	water	ECA576	D	6	q90.TOF	170.7
20170220	jmjdswap	NA	NA	4	bleomycin	water	ECA577	D	7	q90.TOF	180.8
20170220	jmjdswap	NA	NA	4	bleomycin	water	ECA577	D	8	q90.TOF	182.5
20170220	jmjdswap	NA	NA	4	bleomycin	water	ECA578	D	9	q90.TOF	178.3
20170220	jmjdswap	NA	NA	4	bleomycin	water	ECA578	E	10	q90.TOF	184.1
20170220	jmjdswap	NA	NA	4	bleomycin	water	ECA579	E	11	q90.TOF	186
20170220	jmjdswap	NA	NA	4	bleomycin	water	ECA579	E	12	q90.TOF	185.5
20170220	jmjdswap	NA	NA	4	bleomycin	water	N2	E	2	q90.TOF	151.9
20170220	jmjdswap	NA	NA	4	bleomycin	water	CB4856	E	4	q90.TOF	183.6
20170220	jmjdswap	NA	NA	4	bleomycin	water	ECA576	E	5	q90.TOF	164
20170220	jmjdswap	NA	NA	4	bleomycin	water	ECA577	E	7	q90.TOF	186.3
20170220	jmjdswap	NA	NA	4	bleomycin	water	ECA577	E	8	q90.TOF	147
20170220	jmjdswap	NA	NA	4	bleomycin	water	ECA578	E	9	q90.TOF	187
20170220	jmjdswap	NA	NA	4	bleomycin	water	ECA579	F	12	q90.TOF	192.1
20170220	jmjdswap	NA	NA	4	bleomycin	water	CB4856	F	3	q90.TOF	198.4
20170220	jmjdswap	NA	NA	4	bleomycin	water	CB4856	F	4	q90.TOF	184
20170220	jmjdswap	NA	NA	4	bleomycin	water	ECA576	F	5	q90.TOF	162.9
20170220	jmjdswap	NA	NA	4	bleomycin	water	ECA578	F	9	q90.TOF	190
20170220	jmjdswap	NA	NA	4	bleomycin	water	N2	G	2	q90.TOF	197.8
20170220	jmjdswap	NA	NA	4	bleomycin	water	CB4856	G	3	q90.TOF	189.8
20170220	jmjdswap	NA	NA	4	bleomycin	water	ECA576	G	5	q90.TOF	154.7
20170220	jmjdswap	NA	NA	4	bleomycin	water	ECA578	G	9	q90.TOF	162.6
20170220	jmjdswap	NA	NA	4	bleomycin	water	CB4856	H	3	q90.TOF	155.5
20170220	jmjdswap	NA	NA	4	bleomycin	water	ECA576	H	5	q90.TOF	161.8
20170220	jmjdswap	NA	NA	4	bleomycin	water	ECA577	H	7	q90.TOF	181
20170220	jmjdswap	NA	NA	5	water	None	ECA578	A	10	q90.TOF	457.9
20170220	jmjdswap	NA	NA	5	water	None	ECA579	A	12	q90.TOF	500.6
20170220	jmjdswap	NA	NA	5	water	None	CB4856	A	4	q90.TOF	446.5
20170220	jmjdswap	NA	NA	5	water	None	ECA576	A	5	q90.TOF	409
20170220	jmjdswap	NA	NA	5	water	None	ECA576	A	6	q90.TOF	397.2
20170220	jmjdswap	NA	NA	5	water	None	ECA578	A	9	q90.TOF	459.8
20170220	jmjdswap	NA	NA	5	water	None	ECA579	B	12	q90.TOF	439.6
20170220	jmjdswap	NA	NA	5	water	None	N2	B	2	q90.TOF	441.6
20170220	jmjdswap	NA	NA	5	water	None	CB4856	B	3	q90.TOF	467
20170220	jmjdswap	NA	NA	5	water	None	CB4856	B	4	q90.TOF	479
20170220	jmjdswap	NA	NA	5	water	None	ECA576	B	5	q90.TOF	389.6
20170220	jmjdswap	NA	NA	5	water	None	ECA577	B	7	q90.TOF	395.3
20170220	jmjdswap	NA	NA	5	water	None	ECA577	B	8	q90.TOF	404.9
20170220	jmjdswap	NA	NA	5	water	None	ECA578	B	9	q90.TOF	441.8
20170220	jmjdswap	NA	NA	5	water	None	N2	C	1	q90.TOF	447.9
20170220	jmjdswap	NA	NA	5	water	None	ECA578	C	10	q90.TOF	488
20170220	jmjdswap	NA	NA	5	water	None	ECA579	C	12	q90.TOF	473.2
20170220	jmjdswap	NA	NA	5	water	None	CB4856	C	3	q90.TOF	473.6
20170220	jmjdswap	NA	NA	5	water	None	CB4856	C	4	q90.TOF	502.4
20170220	jmjdswap	NA	NA	5	water	None	ECA576	C	5	q90.TOF	404.2
20170220	jmjdswap	NA	NA	5	water	None	ECA577	C	7	q90.TOF	392.8
20170220	jmjdswap	NA	NA	5	water	None	ECA577	C	8	q90.TOF	377
20170220	jmjdswap	NA	NA	5	water	None	ECA578	C	9	q90.TOF	449.8
20170220	jmjdswap	NA	NA	5	water	None	N2	D	1	q90.TOF	409.5
20170220	jmjdswap	NA	NA	5	water	None	ECA578	D	10	q90.TOF	498
20170220	jmjdswap	NA	NA	5	water	None	ECA579	D	12	q90.TOF	439.5
20170220	jmjdswap	NA	NA	5	water	None	N2	D	2	q90.TOF	428.2
20170220	jmjdswap	NA	NA	5	water	None	ECA576	D	5	q90.TOF	389.2
20170220	jmjdswap	NA	NA	5	water	None	ECA576	D	6	q90.TOF	400.4
20170220	jmjdswap	NA	NA	5	water	None	ECA577	D	7	q90.TOF	393.4
20170220	jmjdswap	NA	NA	5	water	None	ECA577	D	8	q90.TOF	388.3
20170220	jmjdswap	NA	NA	5	water	None	ECA578	D	9	q90.TOF	463
20170220	jmjdswap	NA	NA	5	water	None	ECA579	E	12	q90.TOF	430.5
20170220	jmjdswap	NA	NA	5	water	None	N2	E	2	q90.TOF	440.4
20170220	jmjdswap	NA	NA	5	water	None	CB4856	E	3	q90.TOF	443.8
20170220	jmjdswap	NA	NA	5	water	None	ECA576	E	5	q90.TOF	424.8
20170220	jmjdswap	NA	NA	5	water	None	ECA577	E	8	q90.TOF	386.4
20170220	jmjdswap	NA	NA	5	water	None	ECA578	E	9	q90.TOF	442.6
20170220	jmjdswap	NA	NA	5	water	None	ECA579	F	11	q90.TOF	487
20170220	jmjdswap	NA	NA	5	water	None	ECA579	F	12	q90.TOF	453.2
20170220	jmjdswap	NA	NA	5	water	None	N2	F	2	q90.TOF	425.4
20170220	jmjdswap	NA	NA	5	water	None	CB4856	F	3	q90.TOF	474.8
20170220	jmjdswap	NA	NA	5	water	None	CB4856	F	4	q90.TOF	499
20170220	jmjdswap	NA	NA	5	water	None	ECA576	F	6	q90.TOF	406.7
20170220	jmjdswap	NA	NA	5	water	None	ECA577	F	7	q90.TOF	393.4
20170220	jmjdswap	NA	NA	5	water	None	ECA578	F	9	q90.TOF	457
20170220	jmjdswap	NA	NA	5	water	None	ECA578	G	10	q90.TOF	429.9
20170220	jmjdswap	NA	NA	5	water	None	ECA579	G	11	q90.TOF	462.6
20170220	jmjdswap	NA	NA	5	water	None	ECA579	G	12	q90.TOF	450.9
20170220	jmjdswap	NA	NA	5	water	None	N2	G	2	q90.TOF	450
20170220	jmjdswap	NA	NA	5	water	None	CB4856	G	3	q90.TOF	493.7
20170220	jmjdswap	NA	NA	5	water	None	ECA576	G	5	q90.TOF	374
20170220	jmjdswap	NA	NA	5	water	None	ECA576	G	6	q90.TOF	398
20170220	jmjdswap	NA	NA	5	water	None	ECA577	G	8	q90.TOF	416
20170220	jmjdswap	NA	NA	5	water	None	ECA578	G	9	q90.TOF	474
20170220	jmjdswap	NA	NA	5	water	None	N2	H	1	q90.TOF	436.8
20170220	jmjdswap	NA	NA	5	water	None	CB4856	H	3	q90.TOF	464.8
20170220	jmjdswap	NA	NA	6	bleomycin	water	N2	A	1	q90.TOF	186.2
20170220	jmjdswap	NA	NA	6	bleomycin	water	ECA578	A	10	q90.TOF	214.3
20170220	jmjdswap	NA	NA	6	bleomycin	water	ECA579	A	11	q90.TOF	202.5
20170220	jmjdswap	NA	NA	6	bleomycin	water	N2	A	2	q90.TOF	182.2
[truncated: 98,725 more rows]
