# Supplementary material for: A nematode-specific gene underlies bleomycin-response variation in Caenorhabditis elegans
Source: bioRxiv preprint, doi:10.1101/565218, version 2 (2019-05-14)
Supplement: File S3 [file 565218_file27.csv]

date	experiment	round	assay	plate	condition	control	strain	row	col	trait	phenotype
NA	H19	NA	NA	2	bleomycin	water	N2	A	1	n	-0.708615782039736
NA	H19	NA	NA	2	bleomycin	water	ECA1133	A	10	n	128.309787550234
NA	H19	NA	NA	2	bleomycin	water	ECA1134	A	11	n	66.849407618597
NA	H19	NA	NA	2	bleomycin	water	ECA1134	A	12	n	-120.150592381403
NA	H19	NA	NA	2	bleomycin	water	N2	A	2	n	-98.7086157820392
NA	H19	NA	NA	2	bleomycin	water	CB4856	A	3	n	50.2058502494113
NA	H19	NA	NA	2	bleomycin	water	CB4856	A	4	n	228.205850249411
NA	H19	NA	NA	2	bleomycin	water	ECA1135	A	5	n	-97.0384336388306
NA	H19	NA	NA	2	bleomycin	water	ECA1135	A	6	n	-79.0384336388306
NA	H19	NA	NA	2	bleomycin	water	ECA1132	A	7	n	-108.533894281818
NA	H19	NA	NA	2	bleomycin	water	ECA1132	A	8	n	-102.533894281818
NA	H19	NA	NA	2	bleomycin	water	ECA1133	A	9	n	-30.6902124497656
NA	H19	NA	NA	2	bleomycin	water	ECA1133	B	10	n	-47.6902124497656
NA	H19	NA	NA	2	bleomycin	water	ECA1134	B	11	n	93.849407618597
NA	H19	NA	NA	2	bleomycin	water	ECA1134	B	12	n	-13.150592381403
NA	H19	NA	NA	2	bleomycin	water	N2	B	2	n	-118.708615782039
NA	H19	NA	NA	2	bleomycin	water	CB4856	B	3	n	83.2058502494113
NA	H19	NA	NA	2	bleomycin	water	CB4856	B	4	n	205.205850249411
NA	H19	NA	NA	2	bleomycin	water	ECA1135	B	5	n	-102.038433638831
NA	H19	NA	NA	2	bleomycin	water	ECA1135	B	6	n	-99.0384336388306
NA	H19	NA	NA	2	bleomycin	water	ECA1132	B	7	n	-127.533894281818
NA	H19	NA	NA	2	bleomycin	water	ECA1132	B	8	n	-47.5338942818183
NA	H19	NA	NA	2	bleomycin	water	ECA1133	B	9	n	4.30978755023442
NA	H19	NA	NA	2	bleomycin	water	N2	C	1	n	-74.7086157820392
NA	H19	NA	NA	2	bleomycin	water	ECA1133	C	10	n	97.3097875502344
NA	H19	NA	NA	2	bleomycin	water	ECA1134	C	11	n	6.84940761859703
NA	H19	NA	NA	2	bleomycin	water	N2	C	2	n	-21.7086157820392
NA	H19	NA	NA	2	bleomycin	water	CB4856	C	3	n	151.205850249411
NA	H19	NA	NA	2	bleomycin	water	CB4856	C	4	n	145.205850249411
NA	H19	NA	NA	2	bleomycin	water	ECA1135	C	5	n	-14.0384336388306
NA	H19	NA	NA	2	bleomycin	water	ECA1135	C	6	n	-147.038433638831
NA	H19	NA	NA	2	bleomycin	water	ECA1132	C	7	n	-130.533894281818
NA	H19	NA	NA	2	bleomycin	water	ECA1132	C	8	n	-41.5338942818183
NA	H19	NA	NA	2	bleomycin	water	ECA1133	C	9	n	60.3097875502344
NA	H19	NA	NA	2	bleomycin	water	N2	D	1	n	-70.7086157820392
NA	H19	NA	NA	2	bleomycin	water	ECA1133	D	10	n	73.3097875502344
NA	H19	NA	NA	2	bleomycin	water	ECA1134	D	11	n	-92.150592381403
NA	H19	NA	NA	2	bleomycin	water	ECA1134	D	12	n	-47.150592381403
NA	H19	NA	NA	2	bleomycin	water	N2	D	2	n	-51.7086157820392
NA	H19	NA	NA	2	bleomycin	water	CB4856	D	3	n	57.2058502494113
NA	H19	NA	NA	2	bleomycin	water	CB4856	D	4	n	40.2058502494113
NA	H19	NA	NA	2	bleomycin	water	ECA1135	D	5	n	-57.0384336388306
NA	H19	NA	NA	2	bleomycin	water	ECA1135	D	6	n	-28.0384336388306
NA	H19	NA	NA	2	bleomycin	water	ECA1132	D	7	n	-28.5338942818183
NA	H19	NA	NA	2	bleomycin	water	ECA1132	D	8	n	-91.5338942818183
NA	H19	NA	NA	2	bleomycin	water	ECA1133	D	9	n	77.3097875502344
NA	H19	NA	NA	2	bleomycin	water	N2	E	1	n	-58.7086157820392
NA	H19	NA	NA	2	bleomycin	water	ECA1133	E	10	n	100.309787550234
NA	H19	NA	NA	2	bleomycin	water	ECA1134	E	11	n	-23.150592381403
NA	H19	NA	NA	2	bleomycin	water	ECA1134	E	12	n	123.849407618597
NA	H19	NA	NA	2	bleomycin	water	N2	E	2	n	-88.7086157820392
NA	H19	NA	NA	2	bleomycin	water	CB4856	E	3	n	54.2058502494113
NA	H19	NA	NA	2	bleomycin	water	CB4856	E	4	n	219.205850249411
NA	H19	NA	NA	2	bleomycin	water	ECA1135	E	5	n	-44.0384336388306
NA	H19	NA	NA	2	bleomycin	water	ECA1135	E	6	n	-38.0384336388306
NA	H19	NA	NA	2	bleomycin	water	ECA1132	E	8	n	-78.5338942818183
NA	H19	NA	NA	2	bleomycin	water	ECA1133	E	9	n	21.3097875502344
NA	H19	NA	NA	2	bleomycin	water	N2	F	1	n	1.29138421796081
NA	H19	NA	NA	2	bleomycin	water	ECA1134	F	11	n	46.849407618597
NA	H19	NA	NA	2	bleomycin	water	ECA1134	F	12	n	71.849407618597
NA	H19	NA	NA	2	bleomycin	water	N2	F	2	n	-96.7086157820392
NA	H19	NA	NA	2	bleomycin	water	CB4856	F	4	n	135.205850249411
NA	H19	NA	NA	2	bleomycin	water	ECA1135	F	5	n	-113.038433638831
NA	H19	NA	NA	2	bleomycin	water	ECA1135	F	6	n	-19.0384336388306
NA	H19	NA	NA	2	bleomycin	water	ECA1132	F	7	n	-59.5338942818183
NA	H19	NA	NA	2	bleomycin	water	ECA1133	F	9	n	93.3097875502344
NA	H19	NA	NA	2	bleomycin	water	ECA1133	G	10	n	127.309787550234
NA	H19	NA	NA	2	bleomycin	water	ECA1134	G	11	n	88.849407618597
NA	H19	NA	NA	2	bleomycin	water	ECA1134	G	12	n	26.849407618597
NA	H19	NA	NA	2	bleomycin	water	N2	G	2	n	-61.7086157820392
NA	H19	NA	NA	2	bleomycin	water	CB4856	G	3	n	196.205850249411
NA	H19	NA	NA	2	bleomycin	water	CB4856	G	4	n	84.2058502494113
NA	H19	NA	NA	2	bleomycin	water	ECA1135	G	5	n	-44.0384336388306
NA	H19	NA	NA	2	bleomycin	water	ECA1135	G	6	n	-8.03843363883061
NA	H19	NA	NA	2	bleomycin	water	ECA1132	G	7	n	-74.5338942818183
NA	H19	NA	NA	2	bleomycin	water	ECA1132	G	8	n	-54.5338942818183
NA	H19	NA	NA	2	bleomycin	water	ECA1133	G	9	n	30.3097875502344
NA	H19	NA	NA	4	bleomycin	water	N2	A	1	n	-66.7086157820392
NA	H19	NA	NA	4	bleomycin	water	ECA1133	A	10	n	60.3097875502344
NA	H19	NA	NA	4	bleomycin	water	ECA1134	A	11	n	14.849407618597
NA	H19	NA	NA	4	bleomycin	water	ECA1134	A	12	n	114.849407618597
NA	H19	NA	NA	4	bleomycin	water	N2	A	2	n	-77.7086157820392
NA	H19	NA	NA	4	bleomycin	water	CB4856	A	3	n	71.2058502494113
NA	H19	NA	NA	4	bleomycin	water	CB4856	A	4	n	-60.7941497505887
NA	H19	NA	NA	4	bleomycin	water	ECA1135	A	5	n	-13.0384336388306
NA	H19	NA	NA	4	bleomycin	water	ECA1135	A	6	n	-69.0384336388306
NA	H19	NA	NA	4	bleomycin	water	ECA1132	A	7	n	-51.5338942818183
NA	H19	NA	NA	4	bleomycin	water	ECA1132	A	8	n	-120.533894281818
NA	H19	NA	NA	4	bleomycin	water	ECA1133	A	9	n	65.3097875502344
NA	H19	NA	NA	4	bleomycin	water	N2	B	1	n	-116.708615782039
NA	H19	NA	NA	4	bleomycin	water	ECA1133	B	10	n	-13.6902124497656
NA	H19	NA	NA	4	bleomycin	water	ECA1134	B	11	n	119.849407618597
NA	H19	NA	NA	4	bleomycin	water	ECA1134	B	12	n	96.849407618597
NA	H19	NA	NA	4	bleomycin	water	N2	B	2	n	-78.7086157820392
NA	H19	NA	NA	4	bleomycin	water	CB4856	B	3	n	53.2058502494113
NA	H19	NA	NA	4	bleomycin	water	CB4856	B	4	n	78.2058502494113
NA	H19	NA	NA	4	bleomycin	water	ECA1135	B	5	n	0.961566361169391
NA	H19	NA	NA	4	bleomycin	water	ECA1135	B	6	n	-22.0384336388306
NA	H19	NA	NA	4	bleomycin	water	ECA1132	B	7	n	-94.5338942818183
NA	H19	NA	NA	4	bleomycin	water	ECA1132	B	8	n	-117.533894281818
NA	H19	NA	NA	4	bleomycin	water	ECA1133	B	9	n	5.30978755023442
NA	H19	NA	NA	4	bleomycin	water	N2	C	1	n	-79.7086157820392
NA	H19	NA	NA	4	bleomycin	water	ECA1133	C	10	n	40.3097875502344
NA	H19	NA	NA	4	bleomycin	water	ECA1134	C	11	n	71.849407618597
NA	H19	NA	NA	4	bleomycin	water	ECA1134	C	12	n	168.849407618597
NA	H19	NA	NA	4	bleomycin	water	N2	C	2	n	-42.7086157820392
NA	H19	NA	NA	4	bleomycin	water	CB4856	C	3	n	91.2058502494113
NA	H19	NA	NA	4	bleomycin	water	CB4856	C	4	n	128.205850249411
NA	H19	NA	NA	4	bleomycin	water	ECA1135	C	5	n	-58.0384336388306
NA	H19	NA	NA	4	bleomycin	water	ECA1135	C	6	n	-10.0384336388306
NA	H19	NA	NA	4	bleomycin	water	ECA1132	C	7	n	-91.5338942818183
NA	H19	NA	NA	4	bleomycin	water	ECA1132	C	8	n	-50.5338942818183
NA	H19	NA	NA	4	bleomycin	water	ECA1133	C	9	n	89.3097875502344
NA	H19	NA	NA	4	bleomycin	water	N2	D	1	n	-87.7086157820392
NA	H19	NA	NA	4	bleomycin	water	ECA1133	D	10	n	40.3097875502344
NA	H19	NA	NA	4	bleomycin	water	ECA1134	D	11	n	6.84940761859703
NA	H19	NA	NA	4	bleomycin	water	ECA1134	D	12	n	101.849407618597
NA	H19	NA	NA	4	bleomycin	water	N2	D	2	n	-13.7086157820392
NA	H19	NA	NA	4	bleomycin	water	CB4856	D	3	n	4.20585024941126
NA	H19	NA	NA	4	bleomycin	water	CB4856	D	4	n	76.2058502494113
NA	H19	NA	NA	4	bleomycin	water	ECA1135	D	5	n	-106.038433638831
NA	H19	NA	NA	4	bleomycin	water	ECA1135	D	6	n	-40.0384336388306
NA	H19	NA	NA	4	bleomycin	water	ECA1132	D	7	n	-121.533894281818
NA	H19	NA	NA	4	bleomycin	water	ECA1132	D	8	n	-87.5338942818183
NA	H19	NA	NA	4	bleomycin	water	ECA1133	D	9	n	-17.6902124497656
NA	H19	NA	NA	4	bleomycin	water	N2	E	1	n	-46.7086157820392
NA	H19	NA	NA	4	bleomycin	water	ECA1133	E	10	n	80.3097875502344
NA	H19	NA	NA	4	bleomycin	water	ECA1134	E	11	n	65.849407618597
NA	H19	NA	NA	4	bleomycin	water	ECA1134	E	12	n	-2.15059238140297
NA	H19	NA	NA	4	bleomycin	water	N2	E	2	n	-103.708615782039
NA	H19	NA	NA	4	bleomycin	water	CB4856	E	3	n	51.2058502494113
NA	H19	NA	NA	4	bleomycin	water	CB4856	E	4	n	162.205850249411
NA	H19	NA	NA	4	bleomycin	water	ECA1135	E	5	n	-96.0384336388306
NA	H19	NA	NA	4	bleomycin	water	ECA1135	E	6	n	11.9615663611694
NA	H19	NA	NA	4	bleomycin	water	ECA1132	E	7	n	-118.533894281818
NA	H19	NA	NA	4	bleomycin	water	ECA1132	E	8	n	-50.5338942818183
NA	H19	NA	NA	4	bleomycin	water	ECA1133	E	9	n	48.3097875502344
NA	H19	NA	NA	4	bleomycin	water	N2	F	1	n	15.2913842179608
NA	H19	NA	NA	4	bleomycin	water	ECA1133	F	10	n	95.3097875502344
NA	H19	NA	NA	4	bleomycin	water	ECA1134	F	11	n	-85.150592381403
NA	H19	NA	NA	4	bleomycin	water	ECA1134	F	12	n	65.849407618597
NA	H19	NA	NA	4	bleomycin	water	N2	F	2	n	-131.708615782039
NA	H19	NA	NA	4	bleomycin	water	CB4856	F	3	n	83.2058502494113
NA	H19	NA	NA	4	bleomycin	water	CB4856	F	4	n	209.205850249411
NA	H19	NA	NA	4	bleomycin	water	ECA1135	F	5	n	-148.038433638831
NA	H19	NA	NA	4	bleomycin	water	ECA1135	F	6	n	-107.038433638831
NA	H19	NA	NA	4	bleomycin	water	ECA1132	F	7	n	-41.5338942818183
NA	H19	NA	NA	4	bleomycin	water	ECA1132	F	8	n	-117.533894281818
NA	H19	NA	NA	4	bleomycin	water	ECA1133	F	9	n	-49.6902124497656
NA	H19	NA	NA	4	bleomycin	water	N2	G	1	n	-1.70861578203919
NA	H19	NA	NA	4	bleomycin	water	ECA1133	G	10	n	33.3097875502344
NA	H19	NA	NA	4	bleomycin	water	ECA1134	G	11	n	19.849407618597
NA	H19	NA	NA	4	bleomycin	water	ECA1134	G	12	n	-55.150592381403
NA	H19	NA	NA	4	bleomycin	water	N2	G	2	n	-81.7086157820392
NA	H19	NA	NA	4	bleomycin	water	CB4856	G	3	n	-17.7941497505887
NA	H19	NA	NA	4	bleomycin	water	CB4856	G	4	n	135.205850249411
NA	H19	NA	NA	4	bleomycin	water	ECA1135	G	5	n	-80.0384336388306
NA	H19	NA	NA	4	bleomycin	water	ECA1135	G	6	n	-87.0384336388306
NA	H19	NA	NA	4	bleomycin	water	ECA1132	G	7	n	-76.5338942818183
NA	H19	NA	NA	4	bleomycin	water	ECA1132	G	8	n	-80.5338942818183
NA	H19	NA	NA	4	bleomycin	water	ECA1133	G	9	n	22.3097875502344
NA	H19	NA	NA	2	bleomycin	water	N2	A	1	mean.TOF	8.38547760458373
NA	H19	NA	NA	2	bleomycin	water	ECA1133	A	10	mean.TOF	-7.33053093497649
NA	H19	NA	NA	2	bleomycin	water	ECA1134	A	11	mean.TOF	-9.52582120708925
NA	H19	NA	NA	2	bleomycin	water	N2	A	2	mean.TOF	-0.587086497979153
NA	H19	NA	NA	2	bleomycin	water	CB4856	A	3	mean.TOF	12.7822807054731
NA	H19	NA	NA	2	bleomycin	water	CB4856	A	4	mean.TOF	32.395624379096
NA	H19	NA	NA	2	bleomycin	water	ECA1135	A	5	mean.TOF	2.41728359432291
NA	H19	NA	NA	2	bleomycin	water	ECA1135	A	6	mean.TOF	-3.64629379214604
NA	H19	NA	NA	2	bleomycin	water	ECA1132	A	7	mean.TOF	1.26856464645164
NA	H19	NA	NA	2	bleomycin	water	ECA1132	A	8	mean.TOF	-10.2379570926788
NA	H19	NA	NA	2	bleomycin	water	ECA1133	A	9	mean.TOF	-7.88503934047829
NA	H19	NA	NA	2	bleomycin	water	N2	B	1	mean.TOF	-0.592960331258847
NA	H19	NA	NA	2	bleomycin	water	ECA1133	B	10	mean.TOF	-2.76293921837816
NA	H19	NA	NA	2	bleomycin	water	ECA1134	B	11	mean.TOF	-11.4322957462957
NA	H19	NA	NA	2	bleomycin	water	ECA1134	B	12	mean.TOF	-3.89242199760309
NA	H19	NA	NA	2	bleomycin	water	N2	B	2	mean.TOF	10.1508942712516
NA	H19	NA	NA	2	bleomycin	water	CB4856	B	3	mean.TOF	22.0469504957453
NA	H19	NA	NA	2	bleomycin	water	CB4856	B	4	mean.TOF	24.9915374689752
NA	H19	NA	NA	2	bleomycin	water	ECA1135	B	5	mean.TOF	-1.18143435439504
NA	H19	NA	NA	2	bleomycin	water	ECA1135	B	6	mean.TOF	4.17967675671606
NA	H19	NA	NA	2	bleomycin	water	ECA1132	B	7	mean.TOF	0.266183694070698
NA	H19	NA	NA	2	bleomycin	water	ECA1132	B	8	mean.TOF	-8.51410862087508
NA	H19	NA	NA	2	bleomycin	water	ECA1133	B	9	mean.TOF	-2.74804711921639
NA	H19	NA	NA	2	bleomycin	water	N2	C	1	mean.TOF	1.68214427125162
NA	H19	NA	NA	2	bleomycin	water	ECA1133	C	10	mean.TOF	-12.5614514892151
NA	H19	NA	NA	2	bleomycin	water	ECA1134	C	11	mean.TOF	-5.35224723204469
NA	H19	NA	NA	2	bleomycin	water	ECA1134	C	12	mean.TOF	-9.10622429456781
NA	H19	NA	NA	2	bleomycin	water	N2	C	2	mean.TOF	7.54842334101906
NA	H19	NA	NA	2	bleomycin	water	CB4856	C	3	mean.TOF	27.1289187473004
NA	H19	NA	NA	2	bleomycin	water	CB4856	C	4	mean.TOF	18.5615619964104
NA	H19	NA	NA	2	bleomycin	water	ECA1135	C	5	mean.TOF	-4.76701993998063
NA	H19	NA	NA	2	bleomycin	water	ECA1132	C	8	mean.TOF	0.442863711872214
NA	H19	NA	NA	2	bleomycin	water	ECA1133	C	9	mean.TOF	-7.46196241740135
NA	H19	NA	NA	2	bleomycin	water	N2	D	1	mean.TOF	-1.46785572874839
NA	H19	NA	NA	2	bleomycin	water	ECA1133	D	10	mean.TOF	-2.02673974533658
NA	H19	NA	NA	2	bleomycin	water	ECA1134	D	11	mean.TOF	-7.77073462700268
NA	H19	NA	NA	2	bleomycin	water	ECA1134	D	12	mean.TOF	-9.77263938890743
NA	H19	NA	NA	2	bleomycin	water	N2	D	2	mean.TOF	1.55335639246374
NA	H19	NA	NA	2	bleomycin	water	CB4856	D	3	mean.TOF	27.7401988253868
NA	H19	NA	NA	2	bleomycin	water	CB4856	D	4	mean.TOF	18.6857776490186
NA	H19	NA	NA	2	bleomycin	water	ECA1135	D	5	mean.TOF	1.84951802655734
NA	H19	NA	NA	2	bleomycin	water	ECA1135	D	6	mean.TOF	-4.88168311061395
NA	H19	NA	NA	2	bleomycin	water	ECA1132	D	7	mean.TOF	-5.20643535354835
NA	H19	NA	NA	2	bleomycin	water	ECA1132	D	8	mean.TOF	-4.41301430091678
NA	H19	NA	NA	2	bleomycin	water	ECA1133	D	9	mean.TOF	-5.2650577284648
NA	H19	NA	NA	2	bleomycin	water	N2	E	1	mean.TOF	2.52997035820814
NA	H19	NA	NA	2	bleomycin	water	ECA1133	E	10	mean.TOF	-1.09615669028176
NA	H19	NA	NA	2	bleomycin	water	ECA1134	E	11	mean.TOF	-3.53378881419479
NA	H19	NA	NA	2	bleomycin	water	ECA1134	E	12	mean.TOF	-4.60678269108813
NA	H19	NA	NA	2	bleomycin	water	N2	E	2	mean.TOF	13.6095636260903
NA	H19	NA	NA	2	bleomycin	water	CB4856	E	3	mean.TOF	18.7156982138906
NA	H19	NA	NA	2	bleomycin	water	CB4856	E	4	mean.TOF	22.1221917203841
NA	H19	NA	NA	2	bleomycin	water	ECA1135	E	5	mean.TOF	2.19003457215862
NA	H19	NA	NA	2	bleomycin	water	ECA1135	E	6	mean.TOF	-7.03358489202945
NA	H19	NA	NA	2	bleomycin	water	ECA1132	E	7	mean.TOF	-8.37117894329194
NA	H19	NA	NA	2	bleomycin	water	ECA1132	E	8	mean.TOF	1.37570750359451
NA	H19	NA	NA	2	bleomycin	water	ECA1133	E	9	mean.TOF	-6.67991113535007
NA	H19	NA	NA	2	bleomycin	water	N2	F	1	mean.TOF	5.16898637651478
NA	H19	NA	NA	2	bleomycin	water	ECA1134	F	11	mean.TOF	-4.79165578235006
NA	H19	NA	NA	2	bleomycin	water	ECA1134	F	12	mean.TOF	-4.84193306920484
NA	H19	NA	NA	2	bleomycin	water	CB4856	F	3	mean.TOF	24.8389936684361
NA	H19	NA	NA	2	bleomycin	water	CB4856	F	4	mean.TOF	27.7506423395324
NA	H19	NA	NA	2	bleomycin	water	ECA1135	F	5	mean.TOF	9.66720510138727
NA	H19	NA	NA	2	bleomycin	water	ECA1135	F	6	mean.TOF	-1.884814307775
NA	H19	NA	NA	2	bleomycin	water	ECA1132	F	7	mean.TOF	-10.1746937805147
NA	H19	NA	NA	2	bleomycin	water	ECA1132	F	8	mean.TOF	2.91231464645164
NA	H19	NA	NA	2	bleomycin	water	ECA1133	F	9	mean.TOF	-9.43531303681939
NA	H19	NA	NA	2	bleomycin	water	N2	G	1	mean.TOF	-5.28452239541505
NA	H19	NA	NA	2	bleomycin	water	ECA1133	G	10	mean.TOF	-8.24282109360887
NA	H19	NA	NA	2	bleomycin	water	ECA1134	G	11	mean.TOF	-7.26270931897737
NA	H19	NA	NA	2	bleomycin	water	ECA1134	G	12	mean.TOF	-8.0335322460503
NA	H19	NA	NA	2	bleomycin	water	N2	G	2	mean.TOF	14.0276498892291
NA	H19	NA	NA	2	bleomycin	water	CB4856	G	3	mean.TOF	21.3481442209223
NA	H19	NA	NA	2	bleomycin	water	ECA1135	G	5	mean.TOF	0.690034572158625
NA	H19	NA	NA	2	bleomycin	water	ECA1135	G	6	mean.TOF	-4.29290621586691
NA	H19	NA	NA	2	bleomycin	water	ECA1132	G	7	mean.TOF	-5.0246785967916
NA	H19	NA	NA	2	bleomycin	water	ECA1132	G	8	mean.TOF	0.356862518792078
NA	H19	NA	NA	2	bleomycin	water	ECA1133	G	9	mean.TOF	-1.28511475525957
NA	H19	NA	NA	4	bleomycin	water	N2	A	1	mean.TOF	3.9083347474421
NA	H19	NA	NA	4	bleomycin	water	ECA1133	A	10	mean.TOF	-7.09444104987999
NA	H19	NA	NA	4	bleomycin	water	ECA1134	A	11	mean.TOF	-14.4458469360772
NA	H19	NA	NA	4	bleomycin	water	ECA1134	A	12	mean.TOF	-10.1884086196767
NA	H19	NA	NA	4	bleomycin	water	N2	A	2	mean.TOF	0.308856600018747
NA	H19	NA	NA	4	bleomycin	water	CB4856	A	3	mean.TOF	18.3723533730774
NA	H19	NA	NA	4	bleomycin	water	CB4856	A	4	mean.TOF	10.6702436684361
NA	H19	NA	NA	4	bleomycin	water	ECA1135	A	5	mean.TOF	-9.66521511502144
NA	H19	NA	NA	4	bleomycin	water	ECA1135	A	6	mean.TOF	2.35888822625012
NA	H19	NA	NA	4	bleomycin	water	ECA1132	A	7	mean.TOF	-2.99793019890918
NA	H19	NA	NA	4	bleomycin	water	ECA1132	A	8	mean.TOF	-11.0671496392626
NA	H19	NA	NA	4	bleomycin	water	ECA1133	A	9	mean.TOF	-2.57638147115095
NA	H19	NA	NA	4	bleomycin	water	ECA1133	B	10	mean.TOF	-2.99994318663212
NA	H19	NA	NA	4	bleomycin	water	ECA1134	B	11	mean.TOF	-13.502986392062
NA	H19	NA	NA	4	bleomycin	water	ECA1134	B	12	mean.TOF	-8.07073462700268
NA	H19	NA	NA	4	bleomycin	water	N2	B	2	mean.TOF	10.9876998268072
NA	H19	NA	NA	4	bleomycin	water	CB4856	B	4	mean.TOF	10.2104076028623
NA	H19	NA	NA	4	bleomycin	water	ECA1135	B	5	mean.TOF	-10.4079169719819
NA	H19	NA	NA	4	bleomycin	water	ECA1135	B	6	mean.TOF	-7.59810102106171
NA	H19	NA	NA	4	bleomycin	water	ECA1132	B	7	mean.TOF	-7.11476868688168
NA	H19	NA	NA	4	bleomycin	water	ECA1132	B	8	mean.TOF	-8.55562890193546
NA	H19	NA	NA	4	bleomycin	water	ECA1133	B	9	mean.TOF	-9.89879095199525
NA	H19	NA	NA	4	bleomycin	water	N2	C	1	mean.TOF	6.29129920082909
NA	H19	NA	NA	4	bleomycin	water	ECA1133	C	10	mean.TOF	-8.7218473922396
NA	H19	NA	NA	4	bleomycin	water	ECA1134	C	11	mean.TOF	-8.78988845953941
NA	H19	NA	NA	4	bleomycin	water	ECA1134	C	12	mean.TOF	-8.55395086431727
NA	H19	NA	NA	4	bleomycin	water	N2	C	2	mean.TOF	9.61732945643681
NA	H19	NA	NA	4	bleomycin	water	CB4856	C	3	mean.TOF	11.8352242131832
NA	H19	NA	NA	4	bleomycin	water	CB4856	C	4	mean.TOF	10.3498355051708
NA	H19	NA	NA	4	bleomycin	water	ECA1135	C	5	mean.TOF	0.526898978938293
NA	H19	NA	NA	4	bleomycin	water	ECA1135	C	6	mean.TOF	-1.57178523158802
NA	H19	NA	NA	4	bleomycin	water	ECA1132	C	7	mean.TOF	-4.22003184477642
NA	H19	NA	NA	4	bleomycin	water	ECA1132	C	8	mean.TOF	-3.95490474130346
NA	H19	NA	NA	4	bleomycin	water	ECA1133	C	9	mean.TOF	-8.01636428929372
NA	H19	NA	NA	4	bleomycin	water	N2	D	1	mean.TOF	-4.04404620493886
NA	H19	NA	NA	4	bleomycin	water	ECA1133	D	10	mean.TOF	-10.0769875791555
NA	H19	NA	NA	4	bleomycin	water	ECA1134	D	11	mean.TOF	-7.54342370263292
NA	H19	NA	NA	4	bleomycin	water	ECA1134	D	12	mean.TOF	-10.3995290210145
NA	H19	NA	NA	4	bleomycin	water	N2	D	2	mean.TOF	2.68031945373337
NA	H19	NA	NA	4	bleomycin	water	CB4856	D	3	mean.TOF	15.7173024919655
NA	H19	NA	NA	4	bleomycin	water	CB4856	D	4	mean.TOF	8.04379738744435
NA	H19	NA	NA	4	bleomycin	water	ECA1135	D	5	mean.TOF	-3.04452959249028
NA	H19	NA	NA	4	bleomycin	water	ECA1135	D	6	mean.TOF	-10.0899042997502
NA	H19	NA	NA	4	bleomycin	water	ECA1132	D	7	mean.TOF	-9.5221760942891
NA	H19	NA	NA	4	bleomycin	water	ECA1132	D	8	mean.TOF	3.66118759727132
NA	H19	NA	NA	4	bleomycin	water	ECA1133	D	9	mean.TOF	-7.71837267381161
NA	H19	NA	NA	4	bleomycin	water	N2	E	1	mean.TOF	0.220605809713153
NA	H19	NA	NA	4	bleomycin	water	ECA1133	E	10	mean.TOF	-8.44379161182897
NA	H19	NA	NA	4	bleomycin	water	ECA1134	E	11	mean.TOF	-12.895377031493
NA	H19	NA	NA	4	bleomycin	water	ECA1134	E	12	mean.TOF	-2.53776759403564
NA	H19	NA	NA	4	bleomycin	water	N2	E	2	mean.TOF	11.4108676755069
NA	H19	NA	NA	4	bleomycin	water	CB4856	E	3	mean.TOF	16.2342989679753
NA	H19	NA	NA	4	bleomycin	water	CB4856	E	4	mean.TOF	13.6354875708751
NA	H19	NA	NA	4	bleomycin	water	ECA1135	E	5	mean.TOF	-6.61325253621322
NA	H19	NA	NA	4	bleomycin	water	ECA1135	E	6	mean.TOF	-8.83373320496976
NA	H19	NA	NA	4	bleomycin	water	ECA1132	E	7	mean.TOF	-13.0147686868817
NA	H19	NA	NA	4	bleomycin	water	ECA1132	E	8	mean.TOF	-0.424292496405492
NA	H19	NA	NA	4	bleomycin	water	ECA1133	E	9	mean.TOF	-5.86182381726276
NA	H19	NA	NA	4	bleomycin	water	N2	F	1	mean.TOF	10.5345539098058
NA	H19	NA	NA	4	bleomycin	water	ECA1133	F	10	mean.TOF	-6.45610024982915
NA	H19	NA	NA	4	bleomycin	water	ECA1134	F	11	mean.TOF	-5.4397822460503
NA	H19	NA	NA	4	bleomycin	water	ECA1134	F	12	mean.TOF	-16.3440462330139
NA	H19	NA	NA	4	bleomycin	water	N2	F	2	mean.TOF	30.6426705870411
NA	H19	NA	NA	4	bleomycin	water	CB4856	F	3	mean.TOF	8.23570551582564
NA	H19	NA	NA	4	bleomycin	water	CB4856	F	4	mean.TOF	19.2702436684361
NA	H19	NA	NA	4	bleomycin	water	ECA1135	F	6	mean.TOF	-1.30719193015261
NA	H19	NA	NA	4	bleomycin	water	ECA1132	F	7	mean.TOF	-3.67863161523059
NA	H19	NA	NA	4	bleomycin	water	ECA1132	F	8	mean.TOF	2.05727432387101
NA	H19	NA	NA	4	bleomycin	water	ECA1133	F	9	mean.TOF	-9.77958028340632
NA	H19	NA	NA	4	bleomycin	water	N2	G	1	mean.TOF	-0.31953358109737
NA	H19	NA	NA	4	bleomycin	water	ECA1134	G	11	mean.TOF	-10.1851739511194
NA	H19	NA	NA	4	bleomycin	water	N2	G	2	mean.TOF	12.229245720527
NA	H19	NA	NA	4	bleomycin	water	CB4856	G	3	mean.TOF	5.44456799276041
NA	H19	NA	NA	4	bleomycin	water	CB4856	G	4	mean.TOF	9.01310081129322
NA	H19	NA	NA	4	bleomycin	water	ECA1135	G	5	mean.TOF	-1.04932053325683
NA	H19	NA	NA	4	bleomycin	water	ECA1135	G	6	mean.TOF	-2.73143435439505
NA	H19	NA	NA	4	bleomycin	water	ECA1132	G	7	mean.TOF	4.41300909089609
NA	H19	NA	NA	4	bleomycin	water	ECA1132	G	8	mean.TOF	-9.82555300060718
NA	H19	NA	NA	4	bleomycin	water	ECA1133	G	9	mean.TOF	-6.51690747234642
NA	H19	NA	NA	2	bleomycin	water	N2	A	1	q10.TOF	0.430344437171912
NA	H19	NA	NA	2	bleomycin	water	ECA1133	A	10	q10.TOF	9.83467281809021
NA	H19	NA	NA	2	bleomycin	water	ECA1134	A	11	q10.TOF	8.42484669095255
NA	H19	NA	NA	2	bleomycin	water	ECA1134	A	12	q10.TOF	9.42484669095255
NA	H19	NA	NA	2	bleomycin	water	N2	A	2	q10.TOF	-0.56965556282779
NA	H19	NA	NA	2	bleomycin	water	CB4856	A	3	q10.TOF	10.219437368587
NA	H19	NA	NA	2	bleomycin	water	ECA1135	A	5	q10.TOF	-7.43428606955167
NA	H19	NA	NA	2	bleomycin	water	ECA1135	A	6	q10.TOF	-9.83428606955168
NA	H19	NA	NA	2	bleomycin	water	ECA1132	A	7	q10.TOF	-10.9137805373109
NA	H19	NA	NA	2	bleomycin	water	ECA1132	A	8	q10.TOF	-10.7137805373109
NA	H19	NA	NA	2	bleomycin	water	ECA1133	A	9	q10.TOF	10.0346728180902
NA	H19	NA	NA	2	bleomycin	water	N2	B	1	q10.TOF	0.230344437172207
NA	H19	NA	NA	2	bleomycin	water	ECA1133	B	10	q10.TOF	10.3346728180902
NA	H19	NA	NA	2	bleomycin	water	ECA1134	B	11	q10.TOF	9.42484669095255
NA	H19	NA	NA	2	bleomycin	water	CB4856	B	3	q10.TOF	9.71943736858698
NA	H19	NA	NA	2	bleomycin	water	CB4856	B	4	q10.TOF	10.719437368587
NA	H19	NA	NA	2	bleomycin	water	ECA1135	B	5	q10.TOF	-9.83428606955168
NA	H19	NA	NA	2	bleomycin	water	ECA1135	B	6	q10.TOF	-9.83428606955168
NA	H19	NA	NA	2	bleomycin	water	ECA1132	B	8	q10.TOF	-14.7137805373109
NA	H19	NA	NA	2	bleomycin	water	ECA1133	B	9	q10.TOF	9.53467281809022
NA	H19	NA	NA	2	bleomycin	water	N2	C	1	q10.TOF	-3.06965556282779
NA	H19	NA	NA	2	bleomycin	water	ECA1133	C	10	q10.TOF	9.83467281809021
NA	H19	NA	NA	2	bleomycin	water	ECA1134	C	11	q10.TOF	10.4248466909526
NA	H19	NA	NA	2	bleomycin	water	ECA1134	C	12	q10.TOF	7.42484669095255
NA	H19	NA	NA	2	bleomycin	water	N2	C	2	q10.TOF	0.430344437171912
NA	H19	NA	NA	2	bleomycin	water	CB4856	C	3	q10.TOF	10.719437368587
NA	H19	NA	NA	2	bleomycin	water	CB4856	C	4	q10.TOF	10.719437368587
NA	H19	NA	NA	2	bleomycin	water	ECA1135	C	5	q10.TOF	-9.83428606955168
NA	H19	NA	NA	2	bleomycin	water	ECA1135	C	6	q10.TOF	-7.83428606955168
NA	H19	NA	NA	2	bleomycin	water	ECA1132	C	7	q10.TOF	-11.0137805373109
NA	H19	NA	NA	2	bleomycin	water	ECA1132	C	8	q10.TOF	-12.7137805373109
NA	H19	NA	NA	2	bleomycin	water	ECA1133	C	9	q10.TOF	8.83467281809021
NA	H19	NA	NA	2	bleomycin	water	N2	D	1	q10.TOF	0.330344437172202
NA	H19	NA	NA	2	bleomycin	water	ECA1133	D	10	q10.TOF	9.43467281809021
NA	H19	NA	NA	2	bleomycin	water	ECA1134	D	12	q10.TOF	9.32484669095256
NA	H19	NA	NA	2	bleomycin	water	N2	D	2	q10.TOF	-0.56965556282779
NA	H19	NA	NA	2	bleomycin	water	CB4856	D	3	q10.TOF	11.919437368587
NA	H19	NA	NA	2	bleomycin	water	CB4856	D	4	q10.TOF	8.71943736858698
NA	H19	NA	NA	2	bleomycin	water	ECA1135	D	5	q10.TOF	-10.4342860695517
NA	H19	NA	NA	2	bleomycin	water	ECA1135	D	6	q10.TOF	-10.5342860695517
NA	H19	NA	NA	2	bleomycin	water	ECA1132	D	7	q10.TOF	-13.7137805373109
NA	H19	NA	NA	2	bleomycin	water	ECA1132	D	8	q10.TOF	-10.1137805373109
NA	H19	NA	NA	2	bleomycin	water	ECA1133	D	9	q10.TOF	10.8346728180902
NA	H19	NA	NA	2	bleomycin	water	N2	E	1	q10.TOF	-1.56965556282779
NA	H19	NA	NA	2	bleomycin	water	ECA1133	E	10	q10.TOF	9.83467281809021
NA	H19	NA	NA	2	bleomycin	water	ECA1134	E	11	q10.TOF	7.72484669095255
NA	H19	NA	NA	2	bleomycin	water	ECA1134	E	12	q10.TOF	9.42484669095255
NA	H19	NA	NA	2	bleomycin	water	N2	E	2	q10.TOF	-2.46965556282779
NA	H19	NA	NA	2	bleomycin	water	CB4856	E	3	q10.TOF	11.719437368587
NA	H19	NA	NA	2	bleomycin	water	CB4856	E	4	q10.TOF	12.119437368587
NA	H19	NA	NA	2	bleomycin	water	ECA1135	E	5	q10.TOF	-9.13428606955167
NA	H19	NA	NA	2	bleomycin	water	ECA1135	E	6	q10.TOF	-10.8342860695517
NA	H19	NA	NA	2	bleomycin	water	ECA1132	E	7	q10.TOF	-11.7137805373109
NA	H19	NA	NA	2	bleomycin	water	ECA1132	E	8	q10.TOF	-11.8137805373109
NA	H19	NA	NA	2	bleomycin	water	ECA1133	E	9	q10.TOF	9.83467281809021
NA	H19	NA	NA	2	bleomycin	water	N2	F	1	q10.TOF	-1.4696555628278
NA	H19	NA	NA	2	bleomycin	water	ECA1133	F	10	q10.TOF	11.4346728180902
NA	H19	NA	NA	2	bleomycin	water	ECA1134	F	11	q10.TOF	10.4248466909526
NA	H19	NA	NA	2	bleomycin	water	ECA1134	F	12	q10.TOF	9.42484669095255
NA	H19	NA	NA	2	bleomycin	water	N2	F	2	q10.TOF	0.630344437172213
NA	H19	NA	NA	2	bleomycin	water	CB4856	F	3	q10.TOF	9.71943736858698
NA	H19	NA	NA	2	bleomycin	water	CB4856	F	4	q10.TOF	10.719437368587
NA	H19	NA	NA	2	bleomycin	water	ECA1135	F	5	q10.TOF	-9.83428606955168
NA	H19	NA	NA	2	bleomycin	water	ECA1135	F	6	q10.TOF	-10.6342860695517
NA	H19	NA	NA	2	bleomycin	water	ECA1132	F	7	q10.TOF	-11.7137805373109
NA	H19	NA	NA	2	bleomycin	water	ECA1132	F	8	q10.TOF	-13.7137805373109
NA	H19	NA	NA	2	bleomycin	water	ECA1133	F	9	q10.TOF	7.83467281809021
NA	H19	NA	NA	2	bleomycin	water	N2	G	1	q10.TOF	-1.56965556282779
NA	H19	NA	NA	2	bleomycin	water	ECA1133	G	10	q10.TOF	10.8346728180902
NA	H19	NA	NA	2	bleomycin	water	ECA1134	G	11	q10.TOF	10.9248466909526
NA	H19	NA	NA	2	bleomycin	water	N2	G	2	q10.TOF	-0.56965556282779
NA	H19	NA	NA	2	bleomycin	water	CB4856	G	3	q10.TOF	9.71943736858698
NA	H19	NA	NA	2	bleomycin	water	ECA1135	G	5	q10.TOF	-9.83428606955168
NA	H19	NA	NA	2	bleomycin	water	ECA1135	G	6	q10.TOF	-7.53428606955168
NA	H19	NA	NA	2	bleomycin	water	ECA1132	G	7	q10.TOF	-13.1137805373109
NA	H19	NA	NA	2	bleomycin	water	ECA1132	G	8	q10.TOF	-11.7137805373109
NA	H19	NA	NA	2	bleomycin	water	ECA1133	G	9	q10.TOF	9.83467281809021
NA	H19	NA	NA	4	bleomycin	water	N2	A	1	q10.TOF	-1.26965556282779
NA	H19	NA	NA	4	bleomycin	water	ECA1133	A	10	q10.TOF	9.83467281809021
NA	H19	NA	NA	4	bleomycin	water	ECA1134	A	11	q10.TOF	8.42484669095255
NA	H19	NA	NA	4	bleomycin	water	ECA1134	A	12	q10.TOF	9.42484669095255
NA	H19	NA	NA	4	bleomycin	water	N2	A	2	q10.TOF	-3.56965556282779
NA	H19	NA	NA	4	bleomycin	water	CB4856	A	3	q10.TOF	9.71943736858698
NA	H19	NA	NA	4	bleomycin	water	CB4856	A	4	q10.TOF	12.719437368587
NA	H19	NA	NA	4	bleomycin	water	ECA1135	A	5	q10.TOF	-9.83428606955168
NA	H19	NA	NA	4	bleomycin	water	ECA1135	A	6	q10.TOF	-10.6342860695517
NA	H19	NA	NA	4	bleomycin	water	ECA1132	A	7	q10.TOF	-11.7137805373109
NA	H19	NA	NA	4	bleomycin	water	ECA1133	A	9	q10.TOF	10.6346728180902
NA	H19	NA	NA	4	bleomycin	water	N2	B	1	q10.TOF	2.73034443717221
NA	H19	NA	NA	4	bleomycin	water	ECA1133	B	10	q10.TOF	10.8346728180902
NA	H19	NA	NA	4	bleomycin	water	ECA1134	B	11	q10.TOF	8.02484669095255
NA	H19	NA	NA	4	bleomycin	water	ECA1134	B	12	q10.TOF	10.4248466909526
NA	H19	NA	NA	4	bleomycin	water	N2	B	2	q10.TOF	0.530344437172205
NA	H19	NA	NA	4	bleomycin	water	CB4856	B	3	q10.TOF	6.51943736858697
NA	H19	NA	NA	4	bleomycin	water	CB4856	B	4	q10.TOF	6.71943736858698
NA	H19	NA	NA	4	bleomycin	water	ECA1135	B	5	q10.TOF	-9.83428606955168
NA	H19	NA	NA	4	bleomycin	water	ECA1135	B	6	q10.TOF	-7.93428606955169
NA	H19	NA	NA	4	bleomycin	water	ECA1132	B	7	q10.TOF	-9.71378053731092
NA	H19	NA	NA	4	bleomycin	water	ECA1132	B	8	q10.TOF	-11.7137805373109
NA	H19	NA	NA	4	bleomycin	water	N2	C	1	q10.TOF	0.430344437171912
NA	H19	NA	NA	4	bleomycin	water	ECA1133	C	10	q10.TOF	8.83467281809021
NA	H19	NA	NA	4	bleomycin	water	ECA1134	C	11	q10.TOF	8.22484669095255
NA	H19	NA	NA	4	bleomycin	water	ECA1134	C	12	q10.TOF	9.42484669095255
NA	H19	NA	NA	4	bleomycin	water	N2	C	2	q10.TOF	-3.56965556282779
NA	H19	NA	NA	4	bleomycin	water	CB4856	C	3	q10.TOF	8.71943736858698
NA	H19	NA	NA	4	bleomycin	water	CB4856	C	4	q10.TOF	5.71943736858698
NA	H19	NA	NA	4	bleomycin	water	ECA1135	C	5	q10.TOF	-8.83428606955168
NA	H19	NA	NA	4	bleomycin	water	ECA1135	C	6	q10.TOF	-10.7342860695517
NA	H19	NA	NA	4	bleomycin	water	ECA1132	C	7	q10.TOF	-11.7137805373109
NA	H19	NA	NA	4	bleomycin	water	ECA1132	C	8	q10.TOF	-10.3137805373109
NA	H19	NA	NA	4	bleomycin	water	ECA1133	C	9	q10.TOF	9.03467281809022
NA	H19	NA	NA	4	bleomycin	water	N2	D	1	q10.TOF	-2.36965556282779
NA	H19	NA	NA	4	bleomycin	water	ECA1133	D	10	q10.TOF	7.83467281809021
NA	H19	NA	NA	4	bleomycin	water	ECA1134	D	11	q10.TOF	8.72484669095256
NA	H19	NA	NA	4	bleomycin	water	ECA1134	D	12	q10.TOF	11.4248466909526
NA	H19	NA	NA	4	bleomycin	water	N2	D	2	q10.TOF	-0.56965556282779
NA	H19	NA	NA	4	bleomycin	water	CB4856	D	3	q10.TOF	6.71943736858698
NA	H19	NA	NA	4	bleomycin	water	CB4856	D	4	q10.TOF	9.71943736858698
NA	H19	NA	NA	4	bleomycin	water	ECA1135	D	5	q10.TOF	-7.33428606955168
NA	H19	NA	NA	4	bleomycin	water	ECA1135	D	6	q10.TOF	-10.8342860695517
NA	H19	NA	NA	4	bleomycin	water	ECA1132	D	7	q10.TOF	-13.7137805373109
NA	H19	NA	NA	4	bleomycin	water	ECA1132	D	8	q10.TOF	-13.7137805373109
NA	H19	NA	NA	4	bleomycin	water	ECA1133	D	9	q10.TOF	11.8346728180902
NA	H19	NA	NA	4	bleomycin	water	N2	E	1	q10.TOF	-1.56965556282779
NA	H19	NA	NA	4	bleomycin	water	ECA1133	E	10	q10.TOF	10.8346728180902
NA	H19	NA	NA	4	bleomycin	water	ECA1134	E	11	q10.TOF	8.42484669095255
NA	H19	NA	NA	4	bleomycin	water	ECA1134	E	12	q10.TOF	8.82484669095256
NA	H19	NA	NA	4	bleomycin	water	N2	E	2	q10.TOF	1.0303444371722
NA	H19	NA	NA	4	bleomycin	water	CB4856	E	3	q10.TOF	9.71943736858698
NA	H19	NA	NA	4	bleomycin	water	CB4856	E	4	q10.TOF	7.41943736858698
NA	H19	NA	NA	4	bleomycin	water	ECA1135	E	5	q10.TOF	-8.33428606955168
NA	H19	NA	NA	4	bleomycin	water	ECA1135	E	6	q10.TOF	-11.8342860695517
NA	H19	NA	NA	4	bleomycin	water	ECA1132	E	7	q10.TOF	-13.7137805373109
NA	H19	NA	NA	4	bleomycin	water	ECA1132	E	8	q10.TOF	-11.7137805373109
NA	H19	NA	NA	4	bleomycin	water	ECA1133	E	9	q10.TOF	9.83467281809021
NA	H19	NA	NA	4	bleomycin	water	N2	F	1	q10.TOF	-1.56965556282779
NA	H19	NA	NA	4	bleomycin	water	ECA1133	F	10	q10.TOF	10.8346728180902
NA	H19	NA	NA	4	bleomycin	water	ECA1134	F	11	q10.TOF	10.5248466909525
NA	H19	NA	NA	4	bleomycin	water	ECA1134	F	12	q10.TOF	10.6248466909526
NA	H19	NA	NA	4	bleomycin	water	N2	F	2	q10.TOF	2.83034443717222
NA	H19	NA	NA	4	bleomycin	water	CB4856	F	3	q10.TOF	7.71943736858698
NA	H19	NA	NA	4	bleomycin	water	CB4856	F	4	q10.TOF	8.71943736858698
NA	H19	NA	NA	4	bleomycin	water	ECA1135	F	6	q10.TOF	-7.83428606955168
NA	H19	NA	NA	4	bleomycin	water	ECA1132	F	7	q10.TOF	-12.7137805373109
NA	H19	NA	NA	4	bleomycin	water	ECA1132	F	8	q10.TOF	-11.7137805373109
NA	H19	NA	NA	4	bleomycin	water	N2	G	1	q10.TOF	-1.56965556282779
NA	H19	NA	NA	4	bleomycin	water	ECA1133	G	10	q10.TOF	8.83467281809021
NA	H19	NA	NA	4	bleomycin	water	ECA1134	G	11	q10.TOF	9.42484669095255
NA	H19	NA	NA	4	bleomycin	water	ECA1134	G	12	q10.TOF	6.42484669095255
NA	H19	NA	NA	4	bleomycin	water	N2	G	2	q10.TOF	1.23034443717222
NA	H19	NA	NA	4	bleomycin	water	CB4856	G	3	q10.TOF	5.71943736858698
NA	H19	NA	NA	4	bleomycin	water	CB4856	G	4	q10.TOF	7.71943736858698
NA	H19	NA	NA	4	bleomycin	water	ECA1135	G	5	q10.TOF	-10.7342860695517
NA	H19	NA	NA	4	bleomycin	water	ECA1135	G	6	q10.TOF	-5.83428606955168
NA	H19	NA	NA	4	bleomycin	water	ECA1132	G	7	q10.TOF	-9.71378053731092
NA	H19	NA	NA	4	bleomycin	water	ECA1132	G	8	q10.TOF	-9.71378053731092
NA	H19	NA	NA	4	bleomycin	water	ECA1133	G	9	q10.TOF	9.83467281809021
NA	H19	NA	NA	2	bleomycin	water	N2	A	1	q25.TOF	3.1599550756933
NA	H19	NA	NA	2	bleomycin	water	ECA1133	A	10	q25.TOF	2.54776242122815
NA	H19	NA	NA	2	bleomycin	water	ECA1134	A	11	q25.TOF	2.73763270387898
NA	H19	NA	NA	2	bleomycin	water	ECA1134	A	12	q25.TOF	1.73763270387898
NA	H19	NA	NA	2	bleomycin	water	N2	A	2	q25.TOF	-1.34004492430758
NA	H19	NA	NA	2	bleomycin	water	CB4856	A	3	q25.TOF	13.7622343002634
NA	H19	NA	NA	2	bleomycin	water	ECA1135	A	5	q25.TOF	-4.35495128995692
NA	H19	NA	NA	2	bleomycin	water	ECA1135	A	6	q25.TOF	-5.35495128995692
NA	H19	NA	NA	2	bleomycin	water	ECA1132	A	7	q25.TOF	-9.79954662590676
NA	H19	NA	NA	2	bleomycin	water	ECA1132	A	8	q25.TOF	-9.54954662590676
NA	H19	NA	NA	2	bleomycin	water	ECA1133	A	9	q25.TOF	3.29776242122815
NA	H19	NA	NA	2	bleomycin	water	N2	B	1	q25.TOF	2.90995507569242
NA	H19	NA	NA	2	bleomycin	water	ECA1133	B	10	q25.TOF	5.29776242122815
NA	H19	NA	NA	2	bleomycin	water	ECA1134	B	11	q25.TOF	1.73763270387898
NA	H19	NA	NA	2	bleomycin	water	ECA1134	B	12	q25.TOF	-0.512367296121022
NA	H19	NA	NA	2	bleomycin	water	N2	B	2	q25.TOF	-3.09004492430758
NA	H19	NA	NA	2	bleomycin	water	CB4856	B	3	q25.TOF	14.7622343002634
NA	H19	NA	NA	2	bleomycin	water	CB4856	B	4	q25.TOF	15.7622343002634
NA	H19	NA	NA	2	bleomycin	water	ECA1135	B	5	q25.TOF	-6.60495128995692
NA	H19	NA	NA	2	bleomycin	water	ECA1135	B	6	q25.TOF	-7.85495128995692
NA	H19	NA	NA	2	bleomycin	water	ECA1132	B	8	q25.TOF	-12.5495466259068
NA	H19	NA	NA	2	bleomycin	water	ECA1133	B	9	q25.TOF	1.29776242122815
NA	H19	NA	NA	2	bleomycin	water	N2	C	1	q25.TOF	-1.09004492430758
NA	H19	NA	NA	2	bleomycin	water	ECA1133	C	10	q25.TOF	2.29776242122815
NA	H19	NA	NA	2	bleomycin	water	ECA1134	C	11	q25.TOF	2.73763270387898
NA	H19	NA	NA	2	bleomycin	water	ECA1134	C	12	q25.TOF	-1.26236729612102
NA	H19	NA	NA	2	bleomycin	water	N2	C	2	q25.TOF	4.90995507569242
NA	H19	NA	NA	2	bleomycin	water	CB4856	C	3	q25.TOF	14.7622343002634
NA	H19	NA	NA	2	bleomycin	water	CB4856	C	4	q25.TOF	16.7622343002634
NA	H19	NA	NA	2	bleomycin	water	ECA1135	C	5	q25.TOF	-7.35495128995692
NA	H19	NA	NA	2	bleomycin	water	ECA1132	C	7	q25.TOF	-10.2995466259068
NA	H19	NA	NA	2	bleomycin	water	ECA1132	C	8	q25.TOF	-12.0495466259068
NA	H19	NA	NA	2	bleomycin	water	ECA1133	C	9	q25.TOF	2.29776242122815
NA	H19	NA	NA	2	bleomycin	water	N2	D	1	q25.TOF	5.65995507569242
NA	H19	NA	NA	2	bleomycin	water	ECA1133	D	10	q25.TOF	3.29776242122815
NA	H19	NA	NA	2	bleomycin	water	ECA1134	D	12	q25.TOF	1.73763270387898
NA	H19	NA	NA	2	bleomycin	water	N2	D	2	q25.TOF	0.909955075692424
NA	H19	NA	NA	2	bleomycin	water	CB4856	D	3	q25.TOF	18.7622343002634
NA	H19	NA	NA	2	bleomycin	water	CB4856	D	4	q25.TOF	14.0122343002634
NA	H19	NA	NA	2	bleomycin	water	ECA1135	D	5	q25.TOF	-5.35495128995692
NA	H19	NA	NA	2	bleomycin	water	ECA1135	D	6	q25.TOF	-7.35495128995692
NA	H19	NA	NA	2	bleomycin	water	ECA1132	D	7	q25.TOF	-9.54954662590676
NA	H19	NA	NA	2	bleomycin	water	ECA1132	D	8	q25.TOF	-4.54954662590676
NA	H19	NA	NA	2	bleomycin	water	ECA1133	D	9	q25.TOF	4.29776242122815
NA	H19	NA	NA	2	bleomycin	water	N2	E	1	q25.TOF	0.909955075692424
NA	H19	NA	NA	2	bleomycin	water	ECA1133	E	10	q25.TOF	4.29776242122815
NA	H19	NA	NA	2	bleomycin	water	ECA1134	E	11	q25.TOF	1.98763270387898
NA	H19	NA	NA	2	bleomycin	water	ECA1134	E	12	q25.TOF	3.73763270387898
NA	H19	NA	NA	2	bleomycin	water	N2	E	2	q25.TOF	-1.09004492430758
NA	H19	NA	NA	2	bleomycin	water	CB4856	E	3	q25.TOF	13.5122343002634
NA	H19	NA	NA	2	bleomycin	water	CB4856	E	4	q25.TOF	18.7622343002634
NA	H19	NA	NA	2	bleomycin	water	ECA1135	E	5	q25.TOF	-6.10495128995692
NA	H19	NA	NA	2	bleomycin	water	ECA1135	E	6	q25.TOF	-8.35495128995692
NA	H19	NA	NA	2	bleomycin	water	ECA1132	E	7	q25.TOF	-8.54954662590676
NA	H19	NA	NA	2	bleomycin	water	ECA1132	E	8	q25.TOF	-6.29954662590676
NA	H19	NA	NA	2	bleomycin	water	ECA1133	E	9	q25.TOF	2.79776242122815
NA	H19	NA	NA	2	bleomycin	water	N2	F	1	q25.TOF	1.90995507569242
NA	H19	NA	NA	2	bleomycin	water	ECA1133	F	10	q25.TOF	2.29776242122815
NA	H19	NA	NA	2	bleomycin	water	ECA1134	F	11	q25.TOF	4.73763270387898
NA	H19	NA	NA	2	bleomycin	water	ECA1134	F	12	q25.TOF	1.73763270387898
NA	H19	NA	NA	2	bleomycin	water	N2	F	2	q25.TOF	4.40995507569242
NA	H19	NA	NA	2	bleomycin	water	CB4856	F	3	q25.TOF	11.5122343002634
NA	H19	NA	NA	2	bleomycin	water	CB4856	F	4	q25.TOF	16.7622343002634
NA	H19	NA	NA	2	bleomycin	water	ECA1135	F	5	q25.TOF	-6.35495128995692
NA	H19	NA	NA	2	bleomycin	water	ECA1135	F	6	q25.TOF	-6.35495128995692
NA	H19	NA	NA	2	bleomycin	water	ECA1132	F	7	q25.TOF	-10.5495466259068
NA	H19	NA	NA	2	bleomycin	water	ECA1132	F	8	q25.TOF	-10.7995466259068
NA	H19	NA	NA	2	bleomycin	water	ECA1133	F	9	q25.TOF	0.297762421228145
NA	H19	NA	NA	2	bleomycin	water	N2	G	1	q25.TOF	2.65995507569242
NA	H19	NA	NA	2	bleomycin	water	ECA1133	G	10	q25.TOF	2.29776242122815
NA	H19	NA	NA	2	bleomycin	water	ECA1134	G	11	q25.TOF	2.73763270387898
NA	H19	NA	NA	2	bleomycin	water	ECA1134	G	12	q25.TOF	3.73763270387898
NA	H19	NA	NA	2	bleomycin	water	N2	G	2	q25.TOF	0.909955075692424
NA	H19	NA	NA	2	bleomycin	water	CB4856	G	3	q25.TOF	15.7622343002634
NA	H19	NA	NA	2	bleomycin	water	ECA1135	G	5	q25.TOF	-7.35495128995692
NA	H19	NA	NA	2	bleomycin	water	ECA1135	G	6	q25.TOF	-5.35495128995692
NA	H19	NA	NA	2	bleomycin	water	ECA1132	G	7	q25.TOF	-9.29954662590676
NA	H19	NA	NA	2	bleomycin	water	ECA1132	G	8	q25.TOF	-10.5495466259068
NA	H19	NA	NA	4	bleomycin	water	N2	A	1	q25.TOF	-1.09004492430758
NA	H19	NA	NA	4	bleomycin	water	ECA1133	A	10	q25.TOF	1.54776242122815
NA	H19	NA	NA	4	bleomycin	water	ECA1134	A	11	q25.TOF	-0.262367296121022
NA	H19	NA	NA	4	bleomycin	water	ECA1134	A	12	q25.TOF	3.73763270387898
NA	H19	NA	NA	4	bleomycin	water	N2	A	2	q25.TOF	-1.09004492430758
NA	H19	NA	NA	4	bleomycin	water	CB4856	A	3	q25.TOF	12.7622343002634
NA	H19	NA	NA	4	bleomycin	water	CB4856	A	4	q25.TOF	11.7622343002634
NA	H19	NA	NA	4	bleomycin	water	ECA1135	A	5	q25.TOF	-6.35495128995692
NA	H19	NA	NA	4	bleomycin	water	ECA1135	A	6	q25.TOF	-3.35495128995692
NA	H19	NA	NA	4	bleomycin	water	ECA1132	A	7	q25.TOF	-8.54954662590676
NA	H19	NA	NA	4	bleomycin	water	ECA1132	A	8	q25.TOF	-13.0495466259068
NA	H19	NA	NA	4	bleomycin	water	ECA1133	A	9	q25.TOF	4.29776242122815
NA	H19	NA	NA	4	bleomycin	water	N2	B	1	q25.TOF	6.15995507569242
NA	H19	NA	NA	4	bleomycin	water	ECA1133	B	10	q25.TOF	3.04776242122815
NA	H19	NA	NA	4	bleomycin	water	ECA1134	B	11	q25.TOF	0.737632703878978
NA	H19	NA	NA	4	bleomycin	water	ECA1134	B	12	q25.TOF	2.73763270387898
NA	H19	NA	NA	4	bleomycin	water	N2	B	2	q25.TOF	1.65995507569242
NA	H19	NA	NA	4	bleomycin	water	CB4856	B	3	q25.TOF	6.76223430026342
NA	H19	NA	NA	4	bleomycin	water	CB4856	B	4	q25.TOF	10.7622343002634
NA	H19	NA	NA	4	bleomycin	water	ECA1135	B	5	q25.TOF	-9.35495128995692
NA	H19	NA	NA	4	bleomycin	water	ECA1135	B	6	q25.TOF	-5.35495128995692
NA	H19	NA	NA	4	bleomycin	water	ECA1132	B	7	q25.TOF	-9.54954662590676
NA	H19	NA	NA	4	bleomycin	water	ECA1132	B	8	q25.TOF	-9.04954662590676
NA	H19	NA	NA	4	bleomycin	water	N2	C	1	q25.TOF	1.90995507569242
NA	H19	NA	NA	4	bleomycin	water	ECA1133	C	10	q25.TOF	2.29776242122815
NA	H19	NA	NA	4	bleomycin	water	ECA1134	C	11	q25.TOF	0.737632703878978
NA	H19	NA	NA	4	bleomycin	water	ECA1134	C	12	q25.TOF	2.73763270387898
NA	H19	NA	NA	4	bleomycin	water	N2	C	2	q25.TOF	0.659955075692424
NA	H19	NA	NA	4	bleomycin	water	CB4856	C	3	q25.TOF	11.7622343002634
NA	H19	NA	NA	4	bleomycin	water	CB4856	C	4	q25.TOF	9.01223430026342
NA	H19	NA	NA	4	bleomycin	water	ECA1135	C	5	q25.TOF	-6.60495128995692
NA	H19	NA	NA	4	bleomycin	water	ECA1135	C	6	q25.TOF	-7.35495128995692
NA	H19	NA	NA	4	bleomycin	water	ECA1132	C	7	q25.TOF	-9.54954662590676
NA	H19	NA	NA	4	bleomycin	water	ECA1132	C	8	q25.TOF	-8.54954662590676
NA	H19	NA	NA	4	bleomycin	water	ECA1133	C	9	q25.TOF	2.29776242122815
NA	H19	NA	NA	4	bleomycin	water	N2	D	1	q25.TOF	-1.09004492430758
NA	H19	NA	NA	4	bleomycin	water	ECA1133	D	10	q25.TOF	0.297762421228145
NA	H19	NA	NA	4	bleomycin	water	ECA1134	D	11	q25.TOF	-0.262367296121022
NA	H19	NA	NA	4	bleomycin	water	ECA1134	D	12	q25.TOF	2.73763270387898
NA	H19	NA	NA	4	bleomycin	water	N2	D	2	q25.TOF	4.90995507569242
NA	H19	NA	NA	4	bleomycin	water	CB4856	D	3	q25.TOF	10.7622343002634
NA	H19	NA	NA	4	bleomycin	water	CB4856	D	4	q25.TOF	8.76223430026342
NA	H19	NA	NA	4	bleomycin	water	ECA1135	D	5	q25.TOF	-7.35495128995692
NA	H19	NA	NA	4	bleomycin	water	ECA1135	D	6	q25.TOF	-8.35495128995692
NA	H19	NA	NA	4	bleomycin	water	ECA1132	D	7	q25.TOF	-14.5495466259068
NA	H19	NA	NA	4	bleomycin	water	ECA1132	D	8	q25.TOF	-11.5495466259068
NA	H19	NA	NA	4	bleomycin	water	ECA1133	D	9	q25.TOF	2.29776242122815
NA	H19	NA	NA	4	bleomycin	water	N2	E	1	q25.TOF	-0.340044924307576
NA	H19	NA	NA	4	bleomycin	water	ECA1133	E	10	q25.TOF	2.29776242122815
NA	H19	NA	NA	4	bleomycin	water	ECA1134	E	11	q25.TOF	-1.26236729612102
NA	H19	NA	NA	4	bleomycin	water	ECA1134	E	12	q25.TOF	0.737632703878978
NA	H19	NA	NA	4	bleomycin	water	N2	E	2	q25.TOF	5.90995507569242
NA	H19	NA	NA	4	bleomycin	water	CB4856	E	3	q25.TOF	11.7622343002634
NA	H19	NA	NA	4	bleomycin	water	CB4856	E	4	q25.TOF	12.7622343002634
NA	H19	NA	NA	4	bleomycin	water	ECA1135	E	5	q25.TOF	-7.10495128995692
NA	H19	NA	NA	4	bleomycin	water	ECA1135	E	6	q25.TOF	-9.35495128995692
NA	H19	NA	NA	4	bleomycin	water	ECA1132	E	7	q25.TOF	-14.5495466259068
NA	H19	NA	NA	4	bleomycin	water	ECA1132	E	8	q25.TOF	-6.54954662590676
NA	H19	NA	NA	4	bleomycin	water	ECA1133	E	9	q25.TOF	2.29776242122815
NA	H19	NA	NA	4	bleomycin	water	N2	F	1	q25.TOF	0.909955075692424
NA	H19	NA	NA	4	bleomycin	water	ECA1133	F	10	q25.TOF	1.29776242122815
NA	H19	NA	NA	4	bleomycin	water	ECA1134	F	11	q25.TOF	2.48763270387898
NA	H19	NA	NA	4	bleomycin	water	ECA1134	F	12	q25.TOF	3.23763270387898
NA	H19	NA	NA	4	bleomycin	water	CB4856	F	3	q25.TOF	10.7622343002634
NA	H19	NA	NA	4	bleomycin	water	CB4856	F	4	q25.TOF	11.7622343002634
NA	H19	NA	NA	4	bleomycin	water	ECA1135	F	6	q25.TOF	-6.35495128995692
NA	H19	NA	NA	4	bleomycin	water	ECA1132	F	7	q25.TOF	-9.54954662590676
NA	H19	NA	NA	4	bleomycin	water	ECA1132	F	8	q25.TOF	-6.54954662590676
NA	H19	NA	NA	4	bleomycin	water	ECA1133	F	9	q25.TOF	3.04776242122815
NA	H19	NA	NA	4	bleomycin	water	N2	G	1	q25.TOF	-0.0900449243075757
NA	H19	NA	NA	4	bleomycin	water	ECA1133	G	10	q25.TOF	2.29776242122815
NA	H19	NA	NA	4	bleomycin	water	ECA1134	G	11	q25.TOF	0.737632703878978
NA	H19	NA	NA	4	bleomycin	water	ECA1134	G	12	q25.TOF	0.737632703878978
NA	H19	NA	NA	4	bleomycin	water	N2	G	2	q25.TOF	4.90995507569242
NA	H19	NA	NA	4	bleomycin	water	CB4856	G	3	q25.TOF	6.76223430026342
NA	H19	NA	NA	4	bleomycin	water	CB4856	G	4	q25.TOF	9.76223430026342
NA	H19	NA	NA	4	bleomycin	water	ECA1135	G	5	q25.TOF	-6.35495128995692
NA	H19	NA	NA	4	bleomycin	water	ECA1135	G	6	q25.TOF	-2.85495128995692
NA	H19	NA	NA	4	bleomycin	water	ECA1132	G	7	q25.TOF	-7.04954662590676
NA	H19	NA	NA	4	bleomycin	water	ECA1132	G	8	q25.TOF	-6.79954662590676
NA	H19	NA	NA	4	bleomycin	water	ECA1133	G	9	q25.TOF	0.297762421228145
NA	H19	NA	NA	2	bleomycin	water	N2	A	1	median.TOF	1.57904415012795
NA	H19	NA	NA	2	bleomycin	water	ECA1133	A	10	median.TOF	-1.53903146724955
NA	H19	NA	NA	2	bleomycin	water	ECA1134	A	11	median.TOF	-2.2075304737604
NA	H19	NA	NA	2	bleomycin	water	ECA1134	A	12	median.TOF	-1.2075304737604
NA	H19	NA	NA	2	bleomycin	water	N2	A	2	median.TOF	-3.42095584987238
NA	H19	NA	NA	2	bleomycin	water	CB4856	A	3	median.TOF	19.0922911952422
NA	H19	NA	NA	2	bleomycin	water	ECA1135	A	5	median.TOF	-4.03315703656478
NA	H19	NA	NA	2	bleomycin	water	ECA1135	A	6	median.TOF	-5.03315703656478
NA	H19	NA	NA	2	bleomycin	water	ECA1132	A	7	median.TOF	-10.6676291521082
NA	H19	NA	NA	2	bleomycin	water	ECA1132	A	8	median.TOF	-10.1676291521082
NA	H19	NA	NA	2	bleomycin	water	ECA1133	A	9	median.TOF	0.460968532750455
NA	H19	NA	NA	2	bleomycin	water	N2	B	1	median.TOF	2.57904415012762
NA	H19	NA	NA	2	bleomycin	water	ECA1133	B	10	median.TOF	-0.0390314672495451
NA	H19	NA	NA	2	bleomycin	water	ECA1134	B	11	median.TOF	-3.2075304737604
NA	H19	NA	NA	2	bleomycin	water	ECA1134	B	12	median.TOF	-4.2075304737604
NA	H19	NA	NA	2	bleomycin	water	N2	B	2	median.TOF	-2.92095584987238
NA	H19	NA	NA	2	bleomycin	water	CB4856	B	3	median.TOF	24.0922911952422
NA	H19	NA	NA	2	bleomycin	water	CB4856	B	4	median.TOF	27.0922911952422
NA	H19	NA	NA	2	bleomycin	water	ECA1135	B	5	median.TOF	-6.03315703656478
NA	H19	NA	NA	2	bleomycin	water	ECA1135	B	6	median.TOF	-7.03315703656478
NA	H19	NA	NA	2	bleomycin	water	ECA1132	B	7	median.TOF	-6.66762915210824
NA	H19	NA	NA	2	bleomycin	water	ECA1132	B	8	median.TOF	-8.66762915210824
NA	H19	NA	NA	2	bleomycin	water	ECA1133	B	9	median.TOF	0.460968532750455
NA	H19	NA	NA	2	bleomycin	water	N2	C	1	median.TOF	0.0790441501276206
NA	H19	NA	NA	2	bleomycin	water	ECA1133	C	10	median.TOF	-3.53903146724954
NA	H19	NA	NA	2	bleomycin	water	ECA1134	C	11	median.TOF	-2.2075304737604
NA	H19	NA	NA	2	bleomycin	water	ECA1134	C	12	median.TOF	-7.2075304737604
NA	H19	NA	NA	2	bleomycin	water	N2	C	2	median.TOF	4.57904415012762
NA	H19	NA	NA	2	bleomycin	water	CB4856	C	3	median.TOF	27.0922911952422
NA	H19	NA	NA	2	bleomycin	water	CB4856	C	4	median.TOF	24.0922911952422
NA	H19	NA	NA	2	bleomycin	water	ECA1135	C	5	median.TOF	-5.53315703656478
NA	H19	NA	NA	2	bleomycin	water	ECA1132	C	8	median.TOF	-8.66762915210824
NA	H19	NA	NA	2	bleomycin	water	ECA1133	C	9	median.TOF	-1.53903146724955
NA	H19	NA	NA	2	bleomycin	water	N2	D	1	median.TOF	2.57904415012762
NA	H19	NA	NA	2	bleomycin	water	ECA1133	D	10	median.TOF	-1.53903146724955
NA	H19	NA	NA	2	bleomycin	water	ECA1134	D	11	median.TOF	-5.2075304737604
NA	H19	NA	NA	2	bleomycin	water	ECA1134	D	12	median.TOF	-3.7075304737604
NA	H19	NA	NA	2	bleomycin	water	N2	D	2	median.TOF	0.579044150127621
NA	H19	NA	NA	2	bleomycin	water	CB4856	D	3	median.TOF	34.0922911952422
NA	H19	NA	NA	2	bleomycin	water	CB4856	D	4	median.TOF	19.5922911952422
NA	H19	NA	NA	2	bleomycin	water	ECA1135	D	5	median.TOF	-5.03315703656478
NA	H19	NA	NA	2	bleomycin	water	ECA1135	D	6	median.TOF	-7.03315703656478
NA	H19	NA	NA	2	bleomycin	water	ECA1132	D	7	median.TOF	-8.16762915210824
NA	H19	NA	NA	2	bleomycin	water	ECA1132	D	8	median.TOF	-2.66762915210824
NA	H19	NA	NA	2	bleomycin	water	ECA1133	D	9	median.TOF	-1.53903146724955
NA	H19	NA	NA	2	bleomycin	water	N2	E	1	median.TOF	2.07904415012762
NA	H19	NA	NA	2	bleomycin	water	ECA1133	E	10	median.TOF	1.46096853275045
NA	H19	NA	NA	2	bleomycin	water	ECA1134	E	11	median.TOF	-2.2075304737604
NA	H19	NA	NA	2	bleomycin	water	ECA1134	E	12	median.TOF	-0.207530473760397
NA	H19	NA	NA	2	bleomycin	water	N2	E	2	median.TOF	-1.92095584987238
NA	H19	NA	NA	2	bleomycin	water	CB4856	E	3	median.TOF	21.0922911952422
NA	H19	NA	NA	2	bleomycin	water	CB4856	E	4	median.TOF	33.0922911952422
NA	H19	NA	NA	2	bleomycin	water	ECA1135	E	5	median.TOF	-5.03315703656478
NA	H19	NA	NA	2	bleomycin	water	ECA1135	E	6	median.TOF	-7.53315703656478
NA	H19	NA	NA	2	bleomycin	water	ECA1132	E	7	median.TOF	-6.16762915210824
NA	H19	NA	NA	2	bleomycin	water	ECA1132	E	8	median.TOF	-4.66762915210824
NA	H19	NA	NA	2	bleomycin	water	ECA1133	E	9	median.TOF	-1.53903146724955
NA	H19	NA	NA	2	bleomycin	water	N2	F	1	median.TOF	1.57904415012795
NA	H19	NA	NA	2	bleomycin	water	ECA1133	F	10	median.TOF	-3.53903146724954
NA	H19	NA	NA	2	bleomycin	water	ECA1134	F	11	median.TOF	-0.207530473760397
NA	H19	NA	NA	2	bleomycin	water	ECA1134	F	12	median.TOF	-2.2075304737604
NA	H19	NA	NA	2	bleomycin	water	N2	F	2	median.TOF	11.0790441501276
NA	H19	NA	NA	2	bleomycin	water	CB4856	F	3	median.TOF	26.5922911952422
NA	H19	NA	NA	2	bleomycin	water	CB4856	F	4	median.TOF	27.0922911952422
NA	H19	NA	NA	2	bleomycin	water	ECA1135	F	5	median.TOF	-3.03315703656478
NA	H19	NA	NA	2	bleomycin	water	ECA1135	F	6	median.TOF	-6.03315703656478
NA	H19	NA	NA	2	bleomycin	water	ECA1132	F	7	median.TOF	-7.66762915210824
NA	H19	NA	NA	2	bleomycin	water	ECA1132	F	8	median.TOF	-7.16762915210824
NA	H19	NA	NA	2	bleomycin	water	ECA1133	F	9	median.TOF	-4.53903146724955
NA	H19	NA	NA	2	bleomycin	water	N2	G	1	median.TOF	-1.42095584987238
NA	H19	NA	NA	2	bleomycin	water	ECA1133	G	10	median.TOF	-3.53903146724954
NA	H19	NA	NA	2	bleomycin	water	ECA1134	G	11	median.TOF	-2.2075304737604
NA	H19	NA	NA	2	bleomycin	water	ECA1134	G	12	median.TOF	-1.2075304737604
NA	H19	NA	NA	2	bleomycin	water	N2	G	2	median.TOF	9.57904415012762
NA	H19	NA	NA	2	bleomycin	water	CB4856	G	3	median.TOF	30.5922911952422
NA	H19	NA	NA	2	bleomycin	water	ECA1135	G	5	median.TOF	-7.03315703656478
NA	H19	NA	NA	2	bleomycin	water	ECA1135	G	6	median.TOF	-5.03315703656478
NA	H19	NA	NA	2	bleomycin	water	ECA1132	G	7	median.TOF	-5.66762915210824
NA	H19	NA	NA	2	bleomycin	water	ECA1132	G	8	median.TOF	-2.66762915210824
NA	H19	NA	NA	4	bleomycin	water	N2	A	1	median.TOF	-3.42095584987238
NA	H19	NA	NA	4	bleomycin	water	ECA1133	A	10	median.TOF	-4.53903146724955
NA	H19	NA	NA	4	bleomycin	water	ECA1134	A	11	median.TOF	-7.2075304737604
NA	H19	NA	NA	4	bleomycin	water	ECA1134	A	12	median.TOF	-3.2075304737604
NA	H19	NA	NA	4	bleomycin	water	N2	A	2	median.TOF	-2.42095584987238
NA	H19	NA	NA	4	bleomycin	water	CB4856	A	3	median.TOF	16.0922911952422
NA	H19	NA	NA	4	bleomycin	water	CB4856	A	4	median.TOF	13.0922911952422
NA	H19	NA	NA	4	bleomycin	water	ECA1135	A	5	median.TOF	-4.03315703656478
NA	H19	NA	NA	4	bleomycin	water	ECA1135	A	6	median.TOF	-4.03315703656478
NA	H19	NA	NA	4	bleomycin	water	ECA1132	A	7	median.TOF	-6.66762915210824
NA	H19	NA	NA	4	bleomycin	water	ECA1132	A	8	median.TOF	-5.66762915210824
NA	H19	NA	NA	4	bleomycin	water	ECA1133	A	9	median.TOF	-1.53903146724955
NA	H19	NA	NA	4	bleomycin	water	N2	B	1	median.TOF	8.07904415012762
NA	H19	NA	NA	4	bleomycin	water	ECA1133	B	10	median.TOF	-3.53903146724954
NA	H19	NA	NA	4	bleomycin	water	ECA1134	B	11	median.TOF	-4.2075304737604
NA	H19	NA	NA	4	bleomycin	water	ECA1134	B	12	median.TOF	-3.2075304737604
NA	H19	NA	NA	4	bleomycin	water	N2	B	2	median.TOF	4.57904415012762
NA	H19	NA	NA	4	bleomycin	water	CB4856	B	3	median.TOF	7.09229119524215
NA	H19	NA	NA	4	bleomycin	water	CB4856	B	4	median.TOF	13.0922911952422
NA	H19	NA	NA	4	bleomycin	water	ECA1135	B	5	median.TOF	-10.0331570365648
NA	H19	NA	NA	4	bleomycin	water	ECA1135	B	6	median.TOF	-6.03315703656478
NA	H19	NA	NA	4	bleomycin	water	ECA1132	B	7	median.TOF	-3.66762915210824
NA	H19	NA	NA	4	bleomycin	water	ECA1132	B	8	median.TOF	-6.66762915210824
NA	H19	NA	NA	4	bleomycin	water	ECA1133	B	9	median.TOF	-5.53903146724955
NA	H19	NA	NA	4	bleomycin	water	N2	C	1	median.TOF	1.57904415012795
NA	H19	NA	NA	4	bleomycin	water	ECA1133	C	10	median.TOF	-3.53903146724954
NA	H19	NA	NA	4	bleomycin	water	ECA1134	C	11	median.TOF	-3.2075304737604
NA	H19	NA	NA	4	bleomycin	water	ECA1134	C	12	median.TOF	-5.2075304737604
NA	H19	NA	NA	4	bleomycin	water	N2	C	2	median.TOF	0.579044150127621
NA	H19	NA	NA	4	bleomycin	water	CB4856	C	3	median.TOF	15.0922911952422
NA	H19	NA	NA	4	bleomycin	water	CB4856	C	4	median.TOF	13.5922911952422
NA	H19	NA	NA	4	bleomycin	water	ECA1135	C	5	median.TOF	-7.03315703656478
NA	H19	NA	NA	4	bleomycin	water	ECA1135	C	6	median.TOF	-6.53315703656478
NA	H19	NA	NA	4	bleomycin	water	ECA1132	C	7	median.TOF	-9.66762915210824
NA	H19	NA	NA	4	bleomycin	water	ECA1132	C	8	median.TOF	-8.16762915210824
NA	H19	NA	NA	4	bleomycin	water	ECA1133	C	9	median.TOF	-4.53903146724955
NA	H19	NA	NA	4	bleomycin	water	N2	D	1	median.TOF	-1.42095584987238
NA	H19	NA	NA	4	bleomycin	water	ECA1133	D	10	median.TOF	-6.53903146724955
NA	H19	NA	NA	4	bleomycin	water	ECA1134	D	11	median.TOF	-6.2075304737604
NA	H19	NA	NA	4	bleomycin	water	ECA1134	D	12	median.TOF	-3.2075304737604
NA	H19	NA	NA	4	bleomycin	water	N2	D	2	median.TOF	4.57904415012762
NA	H19	NA	NA	4	bleomycin	water	CB4856	D	3	median.TOF	11.5922911952422
NA	H19	NA	NA	4	bleomycin	water	CB4856	D	4	median.TOF	7.09229119524215
NA	H19	NA	NA	4	bleomycin	water	ECA1135	D	5	median.TOF	-8.03315703656478
NA	H19	NA	NA	4	bleomycin	water	ECA1135	D	6	median.TOF	-8.03315703656478
NA	H19	NA	NA	4	bleomycin	water	ECA1132	D	8	median.TOF	-5.66762915210824
NA	H19	NA	NA	4	bleomycin	water	ECA1133	D	9	median.TOF	-3.03903146724954
NA	H19	NA	NA	4	bleomycin	water	N2	E	1	median.TOF	-0.920955849872379
NA	H19	NA	NA	4	bleomycin	water	ECA1133	E	10	median.TOF	-4.03903146724955
NA	H19	NA	NA	4	bleomycin	water	ECA1134	E	11	median.TOF	-6.2075304737604
NA	H19	NA	NA	4	bleomycin	water	ECA1134	E	12	median.TOF	-5.2075304737604
NA	H19	NA	NA	4	bleomycin	water	N2	E	2	median.TOF	5.57904415012762
NA	H19	NA	NA	4	bleomycin	water	CB4856	E	3	median.TOF	16.0922911952422
NA	H19	NA	NA	4	bleomycin	water	CB4856	E	4	median.TOF	21.0922911952422
NA	H19	NA	NA	4	bleomycin	water	ECA1135	E	5	median.TOF	-8.53315703656478
NA	H19	NA	NA	4	bleomycin	water	ECA1135	E	6	median.TOF	-10.5331570365648
NA	H19	NA	NA	4	bleomycin	water	ECA1132	E	8	median.TOF	-5.16762915210824
NA	H19	NA	NA	4	bleomycin	water	ECA1133	E	9	median.TOF	-1.53903146724955
NA	H19	NA	NA	4	bleomycin	water	N2	F	1	median.TOF	0.579044150127621
NA	H19	NA	NA	4	bleomycin	water	ECA1133	F	10	median.TOF	-3.53903146724954
NA	H19	NA	NA	4	bleomycin	water	ECA1134	F	11	median.TOF	-4.2075304737604
NA	H19	NA	NA	4	bleomycin	water	ECA1134	F	12	median.TOF	-4.2075304737604
NA	H19	NA	NA	4	bleomycin	water	CB4856	F	3	median.TOF	11.0922911952422
NA	H19	NA	NA	4	bleomycin	water	CB4856	F	4	median.TOF	18.0922911952422
NA	H19	NA	NA	4	bleomycin	water	ECA1135	F	6	median.TOF	-6.03315703656478
NA	H19	NA	NA	4	bleomycin	water	ECA1132	F	7	median.TOF	-7.66762915210824
NA	H19	NA	NA	4	bleomycin	water	ECA1132	F	8	median.TOF	-1.66762915210824
NA	H19	NA	NA	4	bleomycin	water	ECA1133	F	9	median.TOF	-2.53903146724954
NA	H19	NA	NA	4	bleomycin	water	N2	G	1	median.TOF	-2.42095584987238
NA	H19	NA	NA	4	bleomycin	water	ECA1133	G	10	median.TOF	-4.53903146724955
NA	H19	NA	NA	4	bleomycin	water	ECA1134	G	11	median.TOF	-5.2075304737604
NA	H19	NA	NA	4	bleomycin	water	ECA1134	G	12	median.TOF	-4.2075304737604
NA	H19	NA	NA	4	bleomycin	water	N2	G	2	median.TOF	7.57904415012762
NA	H19	NA	NA	4	bleomycin	water	CB4856	G	3	median.TOF	6.09229119524215
NA	H19	NA	NA	4	bleomycin	water	CB4856	G	4	median.TOF	12.0922911952422
NA	H19	NA	NA	4	bleomycin	water	ECA1135	G	5	median.TOF	-5.03315703656478
NA	H19	NA	NA	4	bleomycin	water	ECA1135	G	6	median.TOF	-4.03315703656478
NA	H19	NA	NA	4	bleomycin	water	ECA1132	G	7	median.TOF	-5.66762915210824
NA	H19	NA	NA	4	bleomycin	water	ECA1132	G	8	median.TOF	-6.66762915210824
NA	H19	NA	NA	4	bleomycin	water	ECA1133	G	9	median.TOF	-5.53903146724955
NA	H19	NA	NA	2	bleomycin	water	N2	A	1	q75.TOF	-0.808394777756741
NA	H19	NA	NA	2	bleomycin	water	ECA1133	A	10	q75.TOF	-6.59833685452622
NA	H19	NA	NA	2	bleomycin	water	ECA1134	A	11	q75.TOF	-7.4538541899241
NA	H19	NA	NA	2	bleomycin	water	N2	A	2	q75.TOF	-5.55839477775627
NA	H19	NA	NA	2	bleomycin	water	CB4856	A	3	q75.TOF	28.3008248376693
NA	H19	NA	NA	2	bleomycin	water	CB4856	A	4	q75.TOF	51.0508248376693
NA	H19	NA	NA	2	bleomycin	water	ECA1135	A	5	q75.TOF	-5.03815858899973
NA	H19	NA	NA	2	bleomycin	water	ECA1135	A	6	q75.TOF	-7.03815858899973
NA	H19	NA	NA	2	bleomycin	water	ECA1132	A	7	q75.TOF	11.7756976853735
NA	H19	NA	NA	2	bleomycin	water	ECA1132	A	8	q75.TOF	-8.72430231462646
NA	H19	NA	NA	2	bleomycin	water	ECA1133	A	9	q75.TOF	-5.59833685452622
NA	H19	NA	NA	2	bleomycin	water	N2	B	1	q75.TOF	-0.558394777756274
NA	H19	NA	NA	2	bleomycin	water	ECA1133	B	10	q75.TOF	-6.09833685452622
NA	H19	NA	NA	2	bleomycin	water	ECA1134	B	11	q75.TOF	-10.4538541899241
NA	H19	NA	NA	2	bleomycin	water	ECA1134	B	12	q75.TOF	-6.2038541899241
NA	H19	NA	NA	2	bleomycin	water	N2	B	2	q75.TOF	3.69160522224373
NA	H19	NA	NA	2	bleomycin	water	CB4856	B	3	q75.TOF	39.0508248376693
NA	H19	NA	NA	2	bleomycin	water	CB4856	B	4	q75.TOF	43.0508248376693
NA	H19	NA	NA	2	bleomycin	water	ECA1135	B	5	q75.TOF	-3.03815858899973
NA	H19	NA	NA	2	bleomycin	water	ECA1135	B	6	q75.TOF	-5.03815858899973
NA	H19	NA	NA	2	bleomycin	water	ECA1132	B	7	q75.TOF	7.77569768537354
NA	H19	NA	NA	2	bleomycin	water	ECA1132	B	8	q75.TOF	-10.2243023146265
NA	H19	NA	NA	2	bleomycin	water	ECA1133	B	9	q75.TOF	-0.848336854526222
NA	H19	NA	NA	2	bleomycin	water	N2	C	1	q75.TOF	-1.30839477775627
NA	H19	NA	NA	2	bleomycin	water	ECA1133	C	10	q75.TOF	-9.59833685452622
NA	H19	NA	NA	2	bleomycin	water	ECA1134	C	11	q75.TOF	-6.4538541899241
NA	H19	NA	NA	2	bleomycin	water	ECA1134	C	12	q75.TOF	-9.4538541899241
NA	H19	NA	NA	2	bleomycin	water	N2	C	2	q75.TOF	8.44160522224373
NA	H19	NA	NA	2	bleomycin	water	CB4856	C	3	q75.TOF	43.0508248376693
NA	H19	NA	NA	2	bleomycin	water	CB4856	C	4	q75.TOF	35.5508248376693
NA	H19	NA	NA	2	bleomycin	water	ECA1135	C	5	q75.TOF	-3.03815858899973
NA	H19	NA	NA	2	bleomycin	water	ECA1132	C	8	q75.TOF	-8.72430231462646
NA	H19	NA	NA	2	bleomycin	water	ECA1133	C	9	q75.TOF	-8.59833685452622
NA	H19	NA	NA	2	bleomycin	water	N2	D	1	q75.TOF	1.69160522224373
NA	H19	NA	NA	2	bleomycin	water	ECA1133	D	10	q75.TOF	-6.59833685452622
NA	H19	NA	NA	2	bleomycin	water	ECA1134	D	11	q75.TOF	-10.4538541899241
NA	H19	NA	NA	2	bleomycin	water	ECA1134	D	12	q75.TOF	-12.4538541899241
NA	H19	NA	NA	2	bleomycin	water	N2	D	2	q75.TOF	1.44160522224373
NA	H19	NA	NA	2	bleomycin	water	CB4856	D	3	q75.TOF	40.0508248376693
NA	H19	NA	NA	2	bleomycin	water	CB4856	D	4	q75.TOF	37.8008248376693
NA	H19	NA	NA	2	bleomycin	water	ECA1135	D	5	q75.TOF	-6.03815858899973
NA	H19	NA	NA	2	bleomycin	water	ECA1135	D	6	q75.TOF	-6.28815858899973
NA	H19	NA	NA	2	bleomycin	water	ECA1132	D	7	q75.TOF	-6.22430231462646
NA	H19	NA	NA	2	bleomycin	water	ECA1132	D	8	q75.TOF	-4.22430231462646
NA	H19	NA	NA	2	bleomycin	water	ECA1133	D	9	q75.TOF	-8.09833685452622
NA	H19	NA	NA	2	bleomycin	water	N2	E	1	q75.TOF	3.94160522224373
NA	H19	NA	NA	2	bleomycin	water	ECA1133	E	10	q75.TOF	0.401663145473778
NA	H19	NA	NA	2	bleomycin	water	ECA1134	E	11	q75.TOF	-7.4538541899241
NA	H19	NA	NA	2	bleomycin	water	ECA1134	E	12	q75.TOF	-5.4538541899241
NA	H19	NA	NA	2	bleomycin	water	N2	E	2	q75.TOF	11.1916052222437
NA	H19	NA	NA	2	bleomycin	water	CB4856	E	3	q75.TOF	37.0508248376693
NA	H19	NA	NA	2	bleomycin	water	CB4856	E	4	q75.TOF	41.0508248376693
NA	H19	NA	NA	2	bleomycin	water	ECA1135	E	5	q75.TOF	-5.03815858899973
NA	H19	NA	NA	2	bleomycin	water	ECA1135	E	6	q75.TOF	-8.78815858899973
NA	H19	NA	NA	2	bleomycin	water	ECA1132	E	7	q75.TOF	-7.97430231462646
NA	H19	NA	NA	2	bleomycin	water	ECA1132	E	8	q75.TOF	-3.22430231462646
NA	H19	NA	NA	2	bleomycin	water	ECA1133	E	9	q75.TOF	-5.59833685452622
NA	H19	NA	NA	2	bleomycin	water	N2	F	1	q75.TOF	0.441605222243726
NA	H19	NA	NA	2	bleomycin	water	ECA1133	F	10	q75.TOF	-9.59833685452622
NA	H19	NA	NA	2	bleomycin	water	ECA1134	F	11	q75.TOF	-7.4538541899241
NA	H19	NA	NA	2	bleomycin	water	ECA1134	F	12	q75.TOF	-7.4538541899241
NA	H19	NA	NA	2	bleomycin	water	CB4856	F	3	q75.TOF	49.5508248376693
NA	H19	NA	NA	2	bleomycin	water	CB4856	F	4	q75.TOF	41.0508248376693
NA	H19	NA	NA	2	bleomycin	water	ECA1135	F	5	q75.TOF	5.96184141100027
NA	H19	NA	NA	2	bleomycin	water	ECA1135	F	6	q75.TOF	-4.53815858899973
NA	H19	NA	NA	2	bleomycin	water	ECA1132	F	7	q75.TOF	-10.2243023146265
NA	H19	NA	NA	2	bleomycin	water	ECA1132	F	8	q75.TOF	-8.72430231462646
NA	H19	NA	NA	2	bleomycin	water	ECA1133	F	9	q75.TOF	-10.5983368545262
NA	H19	NA	NA	2	bleomycin	water	N2	G	1	q75.TOF	-4.55839477775627
NA	H19	NA	NA	2	bleomycin	water	ECA1133	G	10	q75.TOF	-8.59833685452622
NA	H19	NA	NA	2	bleomycin	water	ECA1134	G	11	q75.TOF	-5.4538541899241
NA	H19	NA	NA	2	bleomycin	water	ECA1134	G	12	q75.TOF	-8.4538541899241
NA	H19	NA	NA	2	bleomycin	water	CB4856	G	3	q75.TOF	37.0508248376693
NA	H19	NA	NA	2	bleomycin	water	ECA1135	G	5	q75.TOF	-6.03815858899973
NA	H19	NA	NA	2	bleomycin	water	ECA1135	G	6	q75.TOF	-6.03815858899973
NA	H19	NA	NA	2	bleomycin	water	ECA1132	G	7	q75.TOF	-3.72430231462646
NA	H19	NA	NA	2	bleomycin	water	ECA1132	G	8	q75.TOF	-5.47430231462646
NA	H19	NA	NA	4	bleomycin	water	N2	A	1	q75.TOF	-2.30839477775627
NA	H19	NA	NA	4	bleomycin	water	ECA1133	A	10	q75.TOF	-13.5983368545262
NA	H19	NA	NA	4	bleomycin	water	ECA1134	A	12	q75.TOF	-11.4538541899241
NA	H19	NA	NA	4	bleomycin	water	N2	A	2	q75.TOF	-1.55839477775627
NA	H19	NA	NA	4	bleomycin	water	CB4856	A	3	q75.TOF	29.0508248376693
NA	H19	NA	NA	4	bleomycin	water	CB4856	A	4	q75.TOF	20.0508248376693
NA	H19	NA	NA	4	bleomycin	water	ECA1135	A	5	q75.TOF	-7.03815858899973
NA	H19	NA	NA	4	bleomycin	water	ECA1135	A	6	q75.TOF	-7.03815858899973
NA	H19	NA	NA	4	bleomycin	water	ECA1132	A	7	q75.TOF	-4.22430231462646
NA	H19	NA	NA	4	bleomycin	water	ECA1132	A	8	q75.TOF	-3.47430231462646
NA	H19	NA	NA	4	bleomycin	water	ECA1133	A	9	q75.TOF	-8.09833685452622
NA	H19	NA	NA	4	bleomycin	water	ECA1133	B	10	q75.TOF	-12.5983368545262
NA	H19	NA	NA	4	bleomycin	water	ECA1134	B	11	q75.TOF	-13.4538541899241
NA	H19	NA	NA	4	bleomycin	water	ECA1134	B	12	q75.TOF	-10.4538541899241
NA	H19	NA	NA	4	bleomycin	water	N2	B	2	q75.TOF	17.4416052222437
NA	H19	NA	NA	4	bleomycin	water	CB4856	B	3	q75.TOF	6.5508248376693
NA	H19	NA	NA	4	bleomycin	water	CB4856	B	4	q75.TOF	23.0508248376693
NA	H19	NA	NA	4	bleomycin	water	ECA1135	B	5	q75.TOF	-10.0381585889997
NA	H19	NA	NA	4	bleomycin	water	ECA1135	B	6	q75.TOF	-7.03815858899973
NA	H19	NA	NA	4	bleomycin	water	ECA1132	B	7	q75.TOF	-4.22430231462646
NA	H19	NA	NA	4	bleomycin	water	ECA1132	B	8	q75.TOF	-6.22430231462646
NA	H19	NA	NA	4	bleomycin	water	ECA1133	B	9	q75.TOF	-13.5983368545262
NA	H19	NA	NA	4	bleomycin	water	N2	C	1	q75.TOF	9.94160522224373
NA	H19	NA	NA	4	bleomycin	water	ECA1133	C	10	q75.TOF	-11.8483368545262
NA	H19	NA	NA	4	bleomycin	water	ECA1134	C	11	q75.TOF	-11.4538541899241
NA	H19	NA	NA	4	bleomycin	water	ECA1134	C	12	q75.TOF	-12.4538541899241
NA	H19	NA	NA	4	bleomycin	water	N2	C	2	q75.TOF	-2.30839477775627
NA	H19	NA	NA	4	bleomycin	water	CB4856	C	3	q75.TOF	24.0508248376693
NA	H19	NA	NA	4	bleomycin	water	CB4856	C	4	q75.TOF	21.8008248376693
NA	H19	NA	NA	4	bleomycin	water	ECA1135	C	5	q75.TOF	-7.03815858899973
NA	H19	NA	NA	4	bleomycin	water	ECA1135	C	6	q75.TOF	-6.03815858899973
NA	H19	NA	NA	4	bleomycin	water	ECA1132	C	7	q75.TOF	-11.2243023146265
NA	H19	NA	NA	4	bleomycin	water	ECA1132	C	8	q75.TOF	-6.22430231462646
NA	H19	NA	NA	4	bleomycin	water	ECA1133	C	9	q75.TOF	-10.5983368545262
NA	H19	NA	NA	4	bleomycin	water	N2	D	1	q75.TOF	-1.55839477775627
NA	H19	NA	NA	4	bleomycin	water	ECA1133	D	10	q75.TOF	-14.5983368545262
NA	H19	NA	NA	4	bleomycin	water	ECA1134	D	11	q75.TOF	-12.4538541899241
NA	H19	NA	NA	4	bleomycin	water	ECA1134	D	12	q75.TOF	-11.4538541899241
NA	H19	NA	NA	4	bleomycin	water	N2	D	2	q75.TOF	7.44160522224373
NA	H19	NA	NA	4	bleomycin	water	CB4856	D	3	q75.TOF	13.0508248376693
NA	H19	NA	NA	4	bleomycin	water	ECA1135	D	5	q75.TOF	-8.03815858899973
NA	H19	NA	NA	4	bleomycin	water	ECA1135	D	6	q75.TOF	-8.03815858899973
NA	H19	NA	NA	4	bleomycin	water	ECA1132	D	7	q75.TOF	-0.724302314626461
NA	H19	NA	NA	4	bleomycin	water	ECA1132	D	8	q75.TOF	-4.22430231462646
NA	H19	NA	NA	4	bleomycin	water	ECA1133	D	9	q75.TOF	-12.3483368545262
NA	H19	NA	NA	4	bleomycin	water	N2	E	1	q75.TOF	0.941605222243726
NA	H19	NA	NA	4	bleomycin	water	ECA1133	E	10	q75.TOF	-10.8483368545262
NA	H19	NA	NA	4	bleomycin	water	ECA1134	E	11	q75.TOF	-14.4538541899241
NA	H19	NA	NA	4	bleomycin	water	ECA1134	E	12	q75.TOF	-11.9538541899241
NA	H19	NA	NA	4	bleomycin	water	N2	E	2	q75.TOF	5.44160522224373
NA	H19	NA	NA	4	bleomycin	water	CB4856	E	3	q75.TOF	27.0508248376693
NA	H19	NA	NA	4	bleomycin	water	CB4856	E	4	q75.TOF	30.0508248376693
NA	H19	NA	NA	4	bleomycin	water	ECA1135	E	5	q75.TOF	-6.28815858899973
NA	H19	NA	NA	4	bleomycin	water	ECA1135	E	6	q75.TOF	-11.0381585889997
NA	H19	NA	NA	4	bleomycin	water	ECA1132	E	7	q75.TOF	-13.9743023146265
NA	H19	NA	NA	4	bleomycin	water	ECA1132	E	8	q75.TOF	-6.22430231462646
NA	H19	NA	NA	4	bleomycin	water	ECA1133	E	9	q75.TOF	-8.59833685452622
NA	H19	NA	NA	4	bleomycin	water	N2	F	1	q75.TOF	0.441605222243726
NA	H19	NA	NA	4	bleomycin	water	ECA1133	F	10	q75.TOF	-11.5983368545262
NA	H19	NA	NA	4	bleomycin	water	ECA1134	F	11	q75.TOF	-12.4538541899241
NA	H19	NA	NA	4	bleomycin	water	ECA1134	F	12	q75.TOF	-11.4538541899241
NA	H19	NA	NA	4	bleomycin	water	CB4856	F	3	q75.TOF	20.0508248376693
NA	H19	NA	NA	4	bleomycin	water	CB4856	F	4	q75.TOF	24.5508248376693
NA	H19	NA	NA	4	bleomycin	water	ECA1135	F	6	q75.TOF	-9.53815858899973
NA	H19	NA	NA	4	bleomycin	water	ECA1132	F	7	q75.TOF	-8.22430231462646
NA	H19	NA	NA	4	bleomycin	water	ECA1132	F	8	q75.TOF	-1.22430231462646
NA	H19	NA	NA	4	bleomycin	water	ECA1133	F	9	q75.TOF	-8.34833685452622
NA	H19	NA	NA	4	bleomycin	water	N2	G	1	q75.TOF	-2.55839477775627
NA	H19	NA	NA	4	bleomycin	water	ECA1133	G	10	q75.TOF	-13.5983368545262
NA	H19	NA	NA	4	bleomycin	water	ECA1134	G	11	q75.TOF	-14.4538541899241
NA	H19	NA	NA	4	bleomycin	water	ECA1134	G	12	q75.TOF	-8.4538541899241
NA	H19	NA	NA	4	bleomycin	water	N2	G	2	q75.TOF	14.4416052222437
NA	H19	NA	NA	4	bleomycin	water	CB4856	G	3	q75.TOF	6.0508248376693
NA	H19	NA	NA	4	bleomycin	water	CB4856	G	4	q75.TOF	22.0508248376693
NA	H19	NA	NA	4	bleomycin	water	ECA1135	G	5	q75.TOF	-5.03815858899973
NA	H19	NA	NA	4	bleomycin	water	ECA1135	G	6	q75.TOF	-3.03815858899973
NA	H19	NA	NA	4	bleomycin	water	ECA1132	G	7	q75.TOF	-7.72430231462646
NA	H19	NA	NA	4	bleomycin	water	ECA1132	G	8	q75.TOF	-10.9743023146265
NA	H19	NA	NA	4	bleomycin	water	ECA1133	G	9	q75.TOF	-14.5983368545262
NA	H19	NA	NA	2	bleomycin	water	N2	A	1	q90.TOF	-4.69550704374597
NA	H19	NA	NA	2	bleomycin	water	ECA1133	A	10	q90.TOF	-20.2976695906069
NA	H19	NA	NA	2	bleomycin	water	ECA1134	A	11	q90.TOF	-25.4068165490594
NA	H19	NA	NA	2	bleomycin	water	N2	A	2	q90.TOF	13.6044929562546
NA	H19	NA	NA	2	bleomycin	water	CB4856	A	3	q90.TOF	28.4513868259968
NA	H19	NA	NA	2	bleomycin	water	CB4856	A	4	q90.TOF	49.4513868259968
NA	H19	NA	NA	2	bleomycin	water	ECA1135	A	5	q90.TOF	16.8098441398439
NA	H19	NA	NA	2	bleomycin	water	ECA1135	A	6	q90.TOF	-11.1901558601561
NA	H19	NA	NA	2	bleomycin	water	ECA1132	A	7	q90.TOF	38.106393108153
NA	H19	NA	NA	2	bleomycin	water	ECA1132	A	8	q90.TOF	-6.59360689184701
NA	H19	NA	NA	2	bleomycin	water	ECA1133	A	9	q90.TOF	-16.3976695906069
NA	H19	NA	NA	2	bleomycin	water	N2	B	1	q90.TOF	-6.59550704374535
NA	H19	NA	NA	2	bleomycin	water	ECA1133	B	10	q90.TOF	-16.1976695906069
NA	H19	NA	NA	2	bleomycin	water	ECA1134	B	11	q90.TOF	-27.4068165490594
NA	H19	NA	NA	2	bleomycin	water	ECA1134	B	12	q90.TOF	-6.70681654905933
NA	H19	NA	NA	2	bleomycin	water	N2	B	2	q90.TOF	63.0044929562548
NA	H19	NA	NA	2	bleomycin	water	CB4856	B	3	q90.TOF	39.6513868259968
NA	H19	NA	NA	2	bleomycin	water	CB4856	B	4	q90.TOF	45.4513868259968
NA	H19	NA	NA	2	bleomycin	water	ECA1135	B	5	q90.TOF	21.2098441398439
NA	H19	NA	NA	2	bleomycin	water	ECA1135	B	6	q90.TOF	17.209844139844
NA	H19	NA	NA	2	bleomycin	water	ECA1132	B	7	q90.TOF	38.906393108153
NA	H19	NA	NA	2	bleomycin	water	ECA1132	B	8	q90.TOF	-15.093606891847
NA	H19	NA	NA	2	bleomycin	water	ECA1133	B	9	q90.TOF	-13.1976695906069
NA	H19	NA	NA	2	bleomycin	water	N2	C	1	q90.TOF	8.70449295625464
NA	H19	NA	NA	2	bleomycin	water	ECA1133	C	10	q90.TOF	-24.1976695906069
NA	H19	NA	NA	2	bleomycin	water	ECA1134	C	11	q90.TOF	-20.7068165490593
NA	H19	NA	NA	2	bleomycin	water	N2	C	2	q90.TOF	22.8044929562546
NA	H19	NA	NA	2	bleomycin	water	CB4856	C	3	q90.TOF	49.2513868259969
NA	H19	NA	NA	2	bleomycin	water	CB4856	C	4	q90.TOF	33.4513868259968
NA	H19	NA	NA	2	bleomycin	water	ECA1135	C	5	q90.TOF	-4.79015586015607
NA	H19	NA	NA	2	bleomycin	water	ECA1132	C	8	q90.TOF	14.106393108153
NA	H19	NA	NA	2	bleomycin	water	ECA1133	C	9	q90.TOF	-24.1976695906069
NA	H19	NA	NA	2	bleomycin	water	N2	D	1	q90.TOF	5.50449295625466
NA	H19	NA	NA	2	bleomycin	water	ECA1133	D	10	q90.TOF	-20.1976695906069
NA	H19	NA	NA	2	bleomycin	water	ECA1134	D	11	q90.TOF	-23.8068165490593
NA	H19	NA	NA	2	bleomycin	water	ECA1134	D	12	q90.TOF	-28.4068165490594
NA	H19	NA	NA	2	bleomycin	water	N2	D	2	q90.TOF	27.8044929562547
NA	H19	NA	NA	2	bleomycin	water	CB4856	D	3	q90.TOF	40.4513868259968
NA	H19	NA	NA	2	bleomycin	water	CB4856	D	4	q90.TOF	35.9513868259968
NA	H19	NA	NA	2	bleomycin	water	ECA1135	D	5	q90.TOF	-4.19015586015606
NA	H19	NA	NA	2	bleomycin	water	ECA1135	D	6	q90.TOF	-9.79015586015607
NA	H19	NA	NA	2	bleomycin	water	ECA1132	D	7	q90.TOF	-11.893606891847
NA	H19	NA	NA	2	bleomycin	water	ECA1132	D	8	q90.TOF	16.306393108153
NA	H19	NA	NA	2	bleomycin	water	ECA1133	D	9	q90.TOF	-25.1976695906069
NA	H19	NA	NA	2	bleomycin	water	N2	E	1	q90.TOF	2.20449295625464
NA	H19	NA	NA	2	bleomycin	water	ECA1134	E	11	q90.TOF	-22.4068165490594
NA	H19	NA	NA	2	bleomycin	water	ECA1134	E	12	q90.TOF	-13.4068165490594
NA	H19	NA	NA	2	bleomycin	water	N2	E	2	q90.TOF	59.6044929562546
NA	H19	NA	NA	2	bleomycin	water	CB4856	E	3	q90.TOF	36.5513868259968
NA	H19	NA	NA	2	bleomycin	water	CB4856	E	4	q90.TOF	34.4513868259968
NA	H19	NA	NA	2	bleomycin	water	ECA1135	E	5	q90.TOF	-3.79015586015607
NA	H19	NA	NA	2	bleomycin	water	ECA1135	E	6	q90.TOF	-8.79015586015607
NA	H19	NA	NA	2	bleomycin	water	ECA1132	E	7	q90.TOF	-10.593606891847
NA	H19	NA	NA	2	bleomycin	water	ECA1132	E	8	q90.TOF	-3.09360689184691
NA	H19	NA	NA	2	bleomycin	water	ECA1133	E	9	q90.TOF	-22.1976695906069
NA	H19	NA	NA	2	bleomycin	water	N2	F	1	q90.TOF	21.7044929562547
NA	H19	NA	NA	2	bleomycin	water	ECA1133	F	10	q90.TOF	-26.1976695906069
NA	H19	NA	NA	2	bleomycin	water	ECA1134	F	11	q90.TOF	-21.4068165490594
NA	H19	NA	NA	2	bleomycin	water	ECA1134	F	12	q90.TOF	-15.2068165490593
NA	H19	NA	NA	2	bleomycin	water	CB4856	F	3	q90.TOF	44.4513868259968
NA	H19	NA	NA	2	bleomycin	water	CB4856	F	4	q90.TOF	46.4513868259968
NA	H19	NA	NA	2	bleomycin	water	ECA1135	F	5	q90.TOF	55.609844139844
NA	H19	NA	NA	2	bleomycin	water	ECA1135	F	6	q90.TOF	0.209844139843928
NA	H19	NA	NA	2	bleomycin	water	ECA1132	F	7	q90.TOF	-14.693606891847
NA	H19	NA	NA	2	bleomycin	water	ECA1132	F	8	q90.TOF	4.10639310815298
NA	H19	NA	NA	2	bleomycin	water	ECA1133	F	9	q90.TOF	-26.1976695906069
NA	H19	NA	NA	2	bleomycin	water	N2	G	1	q90.TOF	-6.79550704374536
NA	H19	NA	NA	2	bleomycin	water	ECA1133	G	10	q90.TOF	-21.1976695906069
NA	H19	NA	NA	2	bleomycin	water	ECA1134	G	11	q90.TOF	-17.9068165490594
NA	H19	NA	NA	2	bleomycin	water	ECA1134	G	12	q90.TOF	-23.4068165490594
NA	H19	NA	NA	2	bleomycin	water	N2	G	2	q90.TOF	47.6044929562547
NA	H19	NA	NA	2	bleomycin	water	CB4856	G	3	q90.TOF	30.4513868259968
NA	H19	NA	NA	2	bleomycin	water	ECA1135	G	5	q90.TOF	-5.49015586015607
NA	H19	NA	NA	2	bleomycin	water	ECA1135	G	6	q90.TOF	-8.39015586015604
NA	H19	NA	NA	2	bleomycin	water	ECA1132	G	7	q90.TOF	-2.69360689184701
NA	H19	NA	NA	2	bleomycin	water	ECA1132	G	8	q90.TOF	4.40639310815303
NA	H19	NA	NA	4	bleomycin	water	N2	A	1	q90.TOF	3.70449295625465
NA	H19	NA	NA	4	bleomycin	water	ECA1133	A	10	q90.TOF	-30.1976695906069
NA	H19	NA	NA	4	bleomycin	water	ECA1134	A	11	q90.TOF	-32.4068165490594
NA	H19	NA	NA	4	bleomycin	water	ECA1134	A	12	q90.TOF	-27.4068165490594
NA	H19	NA	NA	4	bleomycin	water	N2	A	2	q90.TOF	-7.99550704374537
NA	H19	NA	NA	4	bleomycin	water	CB4856	A	3	q90.TOF	27.8513868259968
NA	H19	NA	NA	4	bleomycin	water	CB4856	A	4	q90.TOF	17.0513868259968
NA	H19	NA	NA	4	bleomycin	water	ECA1135	A	5	q90.TOF	-10.7901558601561
NA	H19	NA	NA	4	bleomycin	water	ECA1135	A	6	q90.TOF	1.40984413984392
NA	H19	NA	NA	4	bleomycin	water	ECA1132	A	7	q90.TOF	4.30639310815299
NA	H19	NA	NA	4	bleomycin	water	ECA1132	A	8	q90.TOF	-0.193606891847008
NA	H19	NA	NA	4	bleomycin	water	ECA1133	A	9	q90.TOF	-23.9976695906069
NA	H19	NA	NA	4	bleomycin	water	ECA1133	B	10	q90.TOF	-25.1976695906069
NA	H19	NA	NA	4	bleomycin	water	ECA1134	B	11	q90.TOF	-30.4068165490594
NA	H19	NA	NA	4	bleomycin	water	ECA1134	B	12	q90.TOF	-24.4068165490594
NA	H19	NA	NA	4	bleomycin	water	N2	B	2	q90.TOF	31.2044929562546
NA	H19	NA	NA	4	bleomycin	water	CB4856	B	3	q90.TOF	9.6513868259968
NA	H19	NA	NA	4	bleomycin	water	CB4856	B	4	q90.TOF	23.1513868259968
NA	H19	NA	NA	4	bleomycin	water	ECA1135	B	5	q90.TOF	-12.7901558601561
NA	H19	NA	NA	4	bleomycin	water	ECA1135	B	6	q90.TOF	-9.69015586015606
NA	H19	NA	NA	4	bleomycin	water	ECA1132	B	7	q90.TOF	-1.99360689184701
NA	H19	NA	NA	4	bleomycin	water	ECA1132	B	8	q90.TOF	5.90639310815299
NA	H19	NA	NA	4	bleomycin	water	ECA1133	B	9	q90.TOF	-27.9976695906069
NA	H19	NA	NA	4	bleomycin	water	N2	C	1	q90.TOF	47.2044929562546
NA	H19	NA	NA	4	bleomycin	water	ECA1133	C	10	q90.TOF	-27.4976695906069
NA	H19	NA	NA	4	bleomycin	water	ECA1134	C	11	q90.TOF	-30.2068165490593
NA	H19	NA	NA	4	bleomycin	water	ECA1134	C	12	q90.TOF	-29.4068165490594
NA	H19	NA	NA	4	bleomycin	water	N2	C	2	q90.TOF	5.60449295625461
NA	H19	NA	NA	4	bleomycin	water	CB4856	C	3	q90.TOF	20.4513868259968
NA	H19	NA	NA	4	bleomycin	water	CB4856	C	4	q90.TOF	15.1513868259968
NA	H19	NA	NA	4	bleomycin	water	ECA1135	C	5	q90.TOF	7.10984413984395
NA	H19	NA	NA	4	bleomycin	water	ECA1135	C	6	q90.TOF	-2.99015586015606
NA	H19	NA	NA	4	bleomycin	water	ECA1132	C	7	q90.TOF	-5.69360689184704
NA	H19	NA	NA	4	bleomycin	water	ECA1132	C	8	q90.TOF	17.206393108153
NA	H19	NA	NA	4	bleomycin	water	ECA1133	C	9	q90.TOF	-25.1976695906069
NA	H19	NA	NA	4	bleomycin	water	N2	D	1	q90.TOF	5.80449295625466
NA	H19	NA	NA	4	bleomycin	water	ECA1133	D	10	q90.TOF	-31.1976695906069
NA	H19	NA	NA	4	bleomycin	water	ECA1134	D	11	q90.TOF	-27.7068165490593
NA	H19	NA	NA	4	bleomycin	water	ECA1134	D	12	q90.TOF	-26.0068165490594
NA	H19	NA	NA	4	bleomycin	water	N2	D	2	q90.TOF	11.6044929562546
NA	H19	NA	NA	4	bleomycin	water	CB4856	D	3	q90.TOF	16.6513868259968
NA	H19	NA	NA	4	bleomycin	water	CB4856	D	4	q90.TOF	6.45138682599678
NA	H19	NA	NA	4	bleomycin	water	ECA1135	D	5	q90.TOF	5.70984413984393
NA	H19	NA	NA	4	bleomycin	water	ECA1135	D	6	q90.TOF	-13.7901558601561
NA	H19	NA	NA	4	bleomycin	water	ECA1132	D	7	q90.TOF	15.906393108153
NA	H19	NA	NA	4	bleomycin	water	ECA1132	D	8	q90.TOF	2.90639310815299
NA	H19	NA	NA	4	bleomycin	water	ECA1133	D	9	q90.TOF	-25.1976695906069
NA	H19	NA	NA	4	bleomycin	water	N2	E	1	q90.TOF	10.6044929562546
NA	H19	NA	NA	4	bleomycin	water	ECA1133	E	10	q90.TOF	-24.1976695906069
NA	H19	NA	NA	4	bleomycin	water	ECA1134	E	11	q90.TOF	-30.4068165490594
NA	H19	NA	NA	4	bleomycin	water	ECA1134	E	12	q90.TOF	-24.4068165490594
NA	H19	NA	NA	4	bleomycin	water	N2	E	2	q90.TOF	51.6044929562546
NA	H19	NA	NA	4	bleomycin	water	CB4856	E	3	q90.TOF	23.4513868259968
NA	H19	NA	NA	4	bleomycin	water	CB4856	E	4	q90.TOF	26.7513868259968
NA	H19	NA	NA	4	bleomycin	water	ECA1135	E	5	q90.TOF	-8.79015586015607
NA	H19	NA	NA	4	bleomycin	water	ECA1135	E	6	q90.TOF	-13.0901558601561
NA	H19	NA	NA	4	bleomycin	water	ECA1132	E	7	q90.TOF	-7.19360689184698
NA	H19	NA	NA	4	bleomycin	water	ECA1132	E	8	q90.TOF	13.1063931081529
NA	H19	NA	NA	4	bleomycin	water	ECA1133	E	9	q90.TOF	-24.1976695906069
NA	H19	NA	NA	4	bleomycin	water	N2	F	1	q90.TOF	2.20449295625464
NA	H19	NA	NA	4	bleomycin	water	ECA1133	F	10	q90.TOF	-24.1976695906069
NA	H19	NA	NA	4	bleomycin	water	ECA1134	F	11	q90.TOF	-25.8068165490593
NA	H19	NA	NA	4	bleomycin	water	ECA1134	F	12	q90.TOF	-27.8068165490593
NA	H19	NA	NA	4	bleomycin	water	N2	F	2	q90.TOF	70.6044929562545
NA	H19	NA	NA	4	bleomycin	water	CB4856	F	3	q90.TOF	18.8513868259968
NA	H19	NA	NA	4	bleomycin	water	CB4856	F	4	q90.TOF	23.4513868259968
NA	H19	NA	NA	4	bleomycin	water	ECA1135	F	5	q90.TOF	51.5098441398439
NA	H19	NA	NA	4	bleomycin	water	ECA1135	F	6	q90.TOF	1.80984413984394
NA	H19	NA	NA	4	bleomycin	water	ECA1132	F	7	q90.TOF	-12.293606891847
NA	H19	NA	NA	4	bleomycin	water	ECA1132	F	8	q90.TOF	24.906393108153
NA	H19	NA	NA	4	bleomycin	water	ECA1133	F	9	q90.TOF	-21.4976695906069
NA	H19	NA	NA	4	bleomycin	water	N2	G	1	q90.TOF	-5.9955070437453
NA	H19	NA	NA	4	bleomycin	water	ECA1133	G	10	q90.TOF	-28.1976695906069
NA	H19	NA	NA	4	bleomycin	water	ECA1134	G	11	q90.TOF	-30.4068165490594
NA	H19	NA	NA	4	bleomycin	water	ECA1134	G	12	q90.TOF	-16.5068165490593
NA	H19	NA	NA	4	bleomycin	water	N2	G	2	q90.TOF	17.8044929562546
NA	H19	NA	NA	4	bleomycin	water	CB4856	G	3	q90.TOF	16.7513868259968
NA	H19	NA	NA	4	bleomycin	water	CB4856	G	4	q90.TOF	20.4513868259968
NA	H19	NA	NA	4	bleomycin	water	ECA1135	G	5	q90.TOF	-8.89015586015607
NA	H19	NA	NA	4	bleomycin	water	ECA1135	G	6	q90.TOF	-7.59015586015606
NA	H19	NA	NA	4	bleomycin	water	ECA1132	G	7	q90.TOF	28.206393108153
NA	H19	NA	NA	4	bleomycin	water	ECA1132	G	8	q90.TOF	-16.093606891847
NA	H19	NA	NA	4	bleomycin	water	ECA1133	G	9	q90.TOF	-26.1976695906069
NA	H19	NA	NA	2	bleomycin	water	N2	A	1	mean.EXT	53.9560169774766
NA	H19	NA	NA	2	bleomycin	water	ECA1133	A	10	mean.EXT	-26.1008748422144
NA	H19	NA	NA	2	bleomycin	water	ECA1134	A	11	mean.EXT	-35.0756562524081
NA	H19	NA	NA	2	bleomycin	water	ECA1134	A	12	mean.EXT	11.6949065181547
NA	H19	NA	NA	2	bleomycin	water	N2	A	2	mean.EXT	5.94704261849903
NA	H19	NA	NA	2	bleomycin	water	CB4856	A	3	mean.EXT	-6.52961302298157
NA	H19	NA	NA	2	bleomycin	water	CB4856	A	4	mean.EXT	38.9199545649109
NA	H19	NA	NA	2	bleomycin	water	ECA1135	A	5	mean.EXT	36.8253448854481
NA	H19	NA	NA	2	bleomycin	water	ECA1135	A	6	mean.EXT	9.78271281871966
NA	H19	NA	NA	2	bleomycin	water	ECA1132	A	7	mean.EXT	19.1868678141053
NA	H19	NA	NA	2	bleomycin	water	ECA1132	A	8	mean.EXT	-21.953349577199
NA	H19	NA	NA	2	bleomycin	water	ECA1133	A	9	mean.EXT	-34.2812573735903
NA	H19	NA	NA	2	bleomycin	water	N2	B	1	mean.EXT	3.59646328151801
NA	H19	NA	NA	2	bleomycin	water	ECA1133	B	10	mean.EXT	-9.14439423672716
NA	H19	NA	NA	2	bleomycin	water	ECA1134	B	11	mean.EXT	-44.3655656557196
NA	H19	NA	NA	2	bleomycin	water	N2	B	2	mean.EXT	54.0768503108067
NA	H19	NA	NA	2	bleomycin	water	CB4856	B	3	mean.EXT	30.0320781863
NA	H19	NA	NA	2	bleomycin	water	CB4856	B	4	mean.EXT	30.3363897722665
NA	H19	NA	NA	2	bleomycin	water	ECA1135	B	5	mean.EXT	-0.682347422244195
NA	H19	NA	NA	2	bleomycin	water	ECA1135	B	6	mean.EXT	28.5176525777558
NA	H19	NA	NA	2	bleomycin	water	ECA1132	B	7	mean.EXT	11.1356773379148
NA	H19	NA	NA	2	bleomycin	water	ECA1132	B	8	mean.EXT	6.81978860618452
NA	H19	NA	NA	2	bleomycin	water	ECA1133	B	9	mean.EXT	-10.877941588252
NA	H19	NA	NA	2	bleomycin	water	N2	C	1	mean.EXT	5.49461346870144
NA	H19	NA	NA	2	bleomycin	water	ECA1133	C	10	mean.EXT	-51.9019060975601
NA	H19	NA	NA	2	bleomycin	water	ECA1134	C	11	mean.EXT	-25.8777952898412
NA	H19	NA	NA	2	bleomycin	water	ECA1134	C	12	mean.EXT	-34.0213394999781
NA	H19	NA	NA	2	bleomycin	water	N2	C	2	mean.EXT	17.7188076751478
NA	H19	NA	NA	2	bleomycin	water	CB4856	C	3	mean.EXT	45.378232519722
NA	H19	NA	NA	2	bleomycin	water	CB4856	C	4	mean.EXT	14.332688989642
NA	H19	NA	NA	2	bleomycin	water	ECA1135	C	5	mean.EXT	-1.32018526008205
NA	H19	NA	NA	2	bleomycin	water	ECA1132	C	7	mean.EXT	33.0563122585498
NA	H19	NA	NA	2	bleomycin	water	ECA1132	C	8	mean.EXT	24.9483164122361
NA	H19	NA	NA	2	bleomycin	water	ECA1133	C	9	mean.EXT	-26.527178119511
NA	H19	NA	NA	2	bleomycin	water	N2	D	1	mean.EXT	-1.4856496891933
NA	H19	NA	NA	2	bleomycin	water	ECA1133	D	10	mean.EXT	-6.4792698873923
NA	H19	NA	NA	2	bleomycin	water	ECA1134	D	11	mean.EXT	-7.95790733465917
NA	H19	NA	NA	2	bleomycin	water	ECA1134	D	12	mean.EXT	-24.0283835251354
NA	H19	NA	NA	2	bleomycin	water	N2	D	2	mean.EXT	-7.66620524474885
NA	H19	NA	NA	2	bleomycin	water	CB4856	D	3	mean.EXT	49.6551984701259
NA	H19	NA	NA	2	bleomycin	water	CB4856	D	4	mean.EXT	15.280976692948
NA	H19	NA	NA	2	bleomycin	water	ECA1135	D	5	mean.EXT	22.6700335301367
NA	H19	NA	NA	2	bleomycin	water	ECA1135	D	6	mean.EXT	4.58481675686027
NA	H19	NA	NA	2	bleomycin	water	ECA1132	D	7	mean.EXT	-6.16313218589471
NA	H19	NA	NA	2	bleomycin	water	ECA1132	D	8	mean.EXT	-8.01971113326311
NA	H19	NA	NA	2	bleomycin	water	ECA1133	D	9	mean.EXT	-17.9099036277346
NA	H19	NA	NA	2	bleomycin	water	N2	E	1	mean.EXT	11.4436981368937
NA	H19	NA	NA	2	bleomycin	water	ECA1133	E	10	mean.EXT	-16.3737998675927
NA	H19	NA	NA	2	bleomycin	water	ECA1134	E	11	mean.EXT	-10.1070042147905
NA	H19	NA	NA	2	bleomycin	water	ECA1134	E	12	mean.EXT	-24.5789131201509
NA	H19	NA	NA	2	bleomycin	water	N2	E	2	mean.EXT	16.5828986979035
NA	H19	NA	NA	2	bleomycin	water	CB4856	E	3	mean.EXT	26.5313297379612
NA	H19	NA	NA	2	bleomycin	water	CB4856	E	4	mean.EXT	16.960550517182
NA	H19	NA	NA	2	bleomycin	water	ECA1135	E	5	mean.EXT	26.7973135947049
NA	H19	NA	NA	2	bleomycin	water	ECA1135	E	6	mean.EXT	4.94507193259451
NA	H19	NA	NA	2	bleomycin	water	ECA1132	E	7	mean.EXT	-16.3496706474332
NA	H19	NA	NA	2	bleomycin	water	ECA1132	E	8	mean.EXT	22.6832963855339
NA	H19	NA	NA	2	bleomycin	water	ECA1133	E	9	mean.EXT	-25.2630755554085
NA	H19	NA	NA	2	bleomycin	water	N2	F	1	mean.EXT	17.0604029423857
NA	H19	NA	NA	2	bleomycin	water	ECA1134	F	11	mean.EXT	-23.3128643994523
NA	H19	NA	NA	2	bleomycin	water	ECA1134	F	12	mean.EXT	-14.9493748510338
NA	H19	NA	NA	2	bleomycin	water	CB4856	F	3	mean.EXT	64.6243221622036
NA	H19	NA	NA	2	bleomycin	water	CB4856	F	4	mean.EXT	46.8031358388371
NA	H19	NA	NA	2	bleomycin	water	ECA1135	F	5	mean.EXT	25.8033668634701
NA	H19	NA	NA	2	bleomycin	water	ECA1135	F	6	mean.EXT	25.5456246057278
NA	H19	NA	NA	2	bleomycin	water	ECA1132	F	7	mean.EXT	-2.07352544432166
NA	H19	NA	NA	2	bleomycin	water	ECA1132	F	8	mean.EXT	42.8743678141053
NA	H19	NA	NA	2	bleomycin	water	ECA1133	F	9	mean.EXT	-24.5183910264543
NA	H19	NA	NA	2	bleomycin	water	N2	G	1	mean.EXT	-12.2981496891933
NA	H19	NA	NA	2	bleomycin	water	ECA1133	G	10	mean.EXT	-30.3669855988534
NA	H19	NA	NA	2	bleomycin	water	ECA1134	G	11	mean.EXT	-34.9579406346925
NA	H19	NA	NA	2	bleomycin	water	ECA1134	G	12	mean.EXT	-29.8692168584687
NA	H19	NA	NA	2	bleomycin	water	N2	G	2	mean.EXT	21.8106986254135
NA	H19	NA	NA	2	bleomycin	water	CB4856	G	3	mean.EXT	19.1606366189255
NA	H19	NA	NA	2	bleomycin	water	ECA1135	G	5	mean.EXT	16.4668051201287
NA	H19	NA	NA	2	bleomycin	water	ECA1135	G	6	mean.EXT	4.8163538764571
NA	H19	NA	NA	2	bleomycin	water	ECA1132	G	7	mean.EXT	13.4226786249161
NA	H19	NA	NA	2	bleomycin	water	ECA1132	G	8	mean.EXT	20.6437827077223
NA	H19	NA	NA	2	bleomycin	water	ECA1133	G	9	mean.EXT	-30.0064390546543
NA	H19	NA	NA	4	bleomycin	water	N2	A	1	mean.EXT	29.7345884060448
NA	H19	NA	NA	4	bleomycin	water	ECA1133	A	10	mean.EXT	-21.2622208545538
NA	H19	NA	NA	4	bleomycin	water	ECA1134	A	11	mean.EXT	-44.7854904433744
NA	H19	NA	NA	4	bleomycin	water	ECA1134	A	12	mean.EXT	-35.7971014738533
NA	H19	NA	NA	4	bleomycin	water	N2	A	2	mean.EXT	20.1907201738204
NA	H19	NA	NA	4	bleomycin	water	CB4856	A	3	mean.EXT	23.6798337655791
NA	H19	NA	NA	4	bleomycin	water	CB4856	A	4	mean.EXT	0.586524543155982
NA	H19	NA	NA	4	bleomycin	water	ECA1135	A	5	mean.EXT	-22.0930856772778
NA	H19	NA	NA	4	bleomycin	water	ECA1135	A	6	mean.EXT	20.818727846573
NA	H19	NA	NA	4	bleomycin	water	ECA1132	A	7	mean.EXT	8.74588843266199
NA	H19	NA	NA	4	bleomycin	water	ECA1132	A	8	mean.EXT	-22.1381321858947
NA	H19	NA	NA	4	bleomycin	water	ECA1133	A	9	mean.EXT	-16.3948425332006
NA	H19	NA	NA	4	bleomycin	water	ECA1133	B	10	mean.EXT	-4.72653709387001
NA	H19	NA	NA	4	bleomycin	water	ECA1134	B	11	mean.EXT	-44.0034834199829
NA	H19	NA	NA	4	bleomycin	water	ECA1134	B	12	mean.EXT	-33.3211726407816
NA	H19	NA	NA	4	bleomycin	water	N2	B	2	mean.EXT	3.5143503108067
NA	H19	NA	NA	4	bleomycin	water	CB4856	B	4	mean.EXT	-7.82530215473627
NA	H19	NA	NA	4	bleomycin	water	ECA1135	B	5	mean.EXT	-7.57437196212152
NA	H19	NA	NA	4	bleomycin	water	ECA1135	B	6	mean.EXT	-11.3466331365299
NA	H19	NA	NA	4	bleomycin	water	ECA1132	B	7	mean.EXT	-19.5362803340428
NA	H19	NA	NA	4	bleomycin	water	ECA1132	B	8	mean.EXT	-24.9042612181528
NA	H19	NA	NA	4	bleomycin	water	ECA1133	B	9	mean.EXT	-24.1579616748756
NA	H19	NA	NA	4	bleomycin	water	N2	C	1	mean.EXT	17.1710404516518
NA	H19	NA	NA	4	bleomycin	water	ECA1133	C	10	mean.EXT	-29.8473314863934
NA	H19	NA	NA	4	bleomycin	water	ECA1134	C	11	mean.EXT	-25.2430551484315
NA	H19	NA	NA	4	bleomycin	water	ECA1134	C	12	mean.EXT	-23.9248862573758
NA	H19	NA	NA	4	bleomycin	water	N2	C	2	mean.EXT	50.3800910515474
NA	H19	NA	NA	4	bleomycin	water	CB4856	C	3	mean.EXT	-2.32464833066279
NA	H19	NA	NA	4	bleomycin	water	CB4856	C	4	mean.EXT	3.97359937308796
NA	H19	NA	NA	4	bleomycin	water	ECA1135	C	5	mean.EXT	29.1811141162173
NA	H19	NA	NA	4	bleomycin	water	ECA1135	C	6	mean.EXT	23.0242315251242
NA	H19	NA	NA	4	bleomycin	water	ECA1132	C	7	mean.EXT	17.0855520246316
NA	H19	NA	NA	4	bleomycin	water	ECA1132	C	8	mean.EXT	2.24452087532979
NA	H19	NA	NA	4	bleomycin	water	ECA1133	C	9	mean.EXT	-25.3285332915887
NA	H19	NA	NA	4	bleomycin	water	N2	D	1	mean.EXT	-13.1741417526854
NA	H19	NA	NA	4	bleomycin	water	ECA1133	D	10	mean.EXT	-20.0062099910663
NA	H19	NA	NA	4	bleomycin	water	ECA1134	D	11	mean.EXT	-20.1375992114099
NA	H19	NA	NA	4	bleomycin	water	ECA1134	D	12	mean.EXT	-40.3773690323818
NA	H19	NA	NA	4	bleomycin	water	N2	D	2	mean.EXT	5.77986125971181
NA	H19	NA	NA	4	bleomycin	water	CB4856	D	3	mean.EXT	49.2781211818115
NA	H19	NA	NA	4	bleomycin	water	CB4856	D	4	mean.EXT	6.91108180407688
NA	H19	NA	NA	4	bleomycin	water	ECA1135	D	5	mean.EXT	11.0712240063272
NA	H19	NA	NA	4	bleomycin	water	ECA1135	D	6	mean.EXT	-5.14628184847371
NA	H19	NA	NA	4	bleomycin	water	ECA1132	D	7	mean.EXT	-1.20294700070951
NA	H19	NA	NA	4	bleomycin	water	ECA1132	D	8	mean.EXT	33.6282612567283
NA	H19	NA	NA	4	bleomycin	water	ECA1133	D	9	mean.EXT	-24.3861524784854
NA	H19	NA	NA	4	bleomycin	water	N2	E	1	mean.EXT	3.33165800311438
NA	H19	NA	NA	4	bleomycin	water	ECA1133	E	10	mean.EXT	-30.4582300072559
NA	H19	NA	NA	4	bleomycin	water	ECA1134	E	11	mean.EXT	-44.0923632463014
NA	H19	NA	NA	4	bleomycin	water	ECA1134	E	12	mean.EXT	1.99007801332617
NA	H19	NA	NA	4	bleomycin	water	N2	E	2	mean.EXT	11.8255205235726
NA	H19	NA	NA	4	bleomycin	water	CB4856	E	3	mean.EXT	26.3809945892389
NA	H19	NA	NA	4	bleomycin	water	CB4856	E	4	mean.EXT	-3.79056604917851
NA	H19	NA	NA	4	bleomycin	water	ECA1135	E	5	mean.EXT	0.366137426240638
NA	H19	NA	NA	4	bleomycin	water	ECA1135	E	6	mean.EXT	2.6670778651121
NA	H19	NA	NA	4	bleomycin	water	ECA1132	E	7	mean.EXT	-17.8547988525614
NA	H19	NA	NA	4	bleomycin	water	ECA1132	E	8	mean.EXT	1.93839842635021
NA	H19	NA	NA	4	bleomycin	water	ECA1133	E	9	mean.EXT	-24.0510866434196
NA	H19	NA	NA	4	bleomycin	water	N2	F	1	mean.EXT	73.0821213951441
NA	H19	NA	NA	4	bleomycin	water	ECA1133	F	10	mean.EXT	-20.5777452723087
NA	H19	NA	NA	4	bleomycin	water	ECA1134	F	11	mean.EXT	-10.8602882870401
NA	H19	NA	NA	4	bleomycin	water	ECA1134	F	12	mean.EXT	-69.1608043109402
NA	H19	NA	NA	4	bleomycin	water	N2	F	2	mean.EXT	89.8893503108067
NA	H19	NA	NA	4	bleomycin	water	CB4856	F	3	mean.EXT	-9.44181739602933
NA	H19	NA	NA	4	bleomycin	water	CB4856	F	4	mean.EXT	19.9602388288703
NA	H19	NA	NA	4	bleomycin	water	ECA1135	F	5	mean.EXT	54.2319382920415
NA	H19	NA	NA	4	bleomycin	water	ECA1135	F	6	mean.EXT	30.1903798504831
NA	H19	NA	NA	4	bleomycin	water	ECA1132	F	7	mean.EXT	11.2286902440118
NA	H19	NA	NA	4	bleomycin	water	ECA1132	F	8	mean.EXT	16.3215452334601
NA	H19	NA	NA	4	bleomycin	water	ECA1133	F	9	mean.EXT	-39.6225048358055
NA	H19	NA	NA	4	bleomycin	water	N2	G	1	mean.EXT	12.7081422571154
NA	H19	NA	NA	4	bleomycin	water	ECA1133	G	10	mean.EXT	-51.1416337122275
NA	H19	NA	NA	4	bleomycin	water	ECA1134	G	11	mean.EXT	-30.2577537248282
NA	H19	NA	NA	4	bleomycin	water	N2	G	2	mean.EXT	50.0342778470386
NA	H19	NA	NA	4	bleomycin	water	CB4856	G	3	mean.EXT	-2.33992333329188
NA	H19	NA	NA	4	bleomycin	water	CB4856	G	4	mean.EXT	-8.37294389538223
NA	H19	NA	NA	4	bleomycin	water	ECA1135	G	5	mean.EXT	16.7127745289753
NA	H19	NA	NA	4	bleomycin	water	ECA1135	G	6	mean.EXT	9.34431924442245
NA	H19	NA	NA	4	bleomycin	water	ECA1132	G	7	mean.EXT	34.0146455918831
NA	H19	NA	NA	4	bleomycin	water	ECA1132	G	8	mean.EXT	-8.03519100942412
NA	H19	NA	NA	4	bleomycin	water	ECA1133	G	9	mean.EXT	-10.0474554612169
NA	H19	NA	NA	2	bleomycin	water	N2	A	1	q10.EXT	-1.9602713611514
NA	H19	NA	NA	2	bleomycin	water	ECA1133	A	10	q10.EXT	16.221234243387
NA	H19	NA	NA	2	bleomycin	water	ECA1134	A	11	q10.EXT	13.8210358391264
NA	H19	NA	NA	2	bleomycin	water	ECA1134	A	12	q10.EXT	16.4210358391264
NA	H19	NA	NA	2	bleomycin	water	N2	A	2	q10.EXT	-5.76027136115146
NA	H19	NA	NA	2	bleomycin	water	CB4856	A	3	q10.EXT	12.2186513888646
NA	H19	NA	NA	2	bleomycin	water	ECA1135	A	5	q10.EXT	-11.5847175593467
NA	H19	NA	NA	2	bleomycin	water	ECA1135	A	6	q10.EXT	-12.3847175593467
NA	H19	NA	NA	2	bleomycin	water	ECA1132	A	7	q10.EXT	-7.09018691736219
NA	H19	NA	NA	2	bleomycin	water	ECA1132	A	8	q10.EXT	-16.4901869173622
NA	H19	NA	NA	2	bleomycin	water	N2	B	1	q10.EXT	-2.86027136115145
NA	H19	NA	NA	2	bleomycin	water	ECA1133	B	10	q10.EXT	16.621234243387
NA	H19	NA	NA	2	bleomycin	water	ECA1134	B	11	q10.EXT	12.8210358391264
NA	H19	NA	NA	2	bleomycin	water	ECA1134	B	12	q10.EXT	16.8210358391264
NA	H19	NA	NA	2	bleomycin	water	CB4856	B	3	q10.EXT	12.2186513888646
NA	H19	NA	NA	2	bleomycin	water	CB4856	B	4	q10.EXT	18.2186513888646
NA	H19	NA	NA	2	bleomycin	water	ECA1135	B	5	q10.EXT	-11.9847175593467
NA	H19	NA	NA	2	bleomycin	water	ECA1135	B	6	q10.EXT	-9.9847175593467
NA	H19	NA	NA	2	bleomycin	water	ECA1132	B	7	q10.EXT	-9.99018691736219
NA	H19	NA	NA	2	bleomycin	water	ECA1132	B	8	q10.EXT	-10.9901869173622
NA	H19	NA	NA	2	bleomycin	water	ECA1133	B	9	q10.EXT	16.121234243387
NA	H19	NA	NA	2	bleomycin	water	N2	C	1	q10.EXT	-7.86027136115145
NA	H19	NA	NA	2	bleomycin	water	ECA1133	C	10	q10.EXT	14.121234243387
NA	H19	NA	NA	2	bleomycin	water	ECA1134	C	11	q10.EXT	11.8210358391264
NA	H19	NA	NA	2	bleomycin	water	ECA1134	C	12	q10.EXT	13.2210358391264
NA	H19	NA	NA	2	bleomycin	water	N2	C	2	q10.EXT	-0.86027136115145
NA	H19	NA	NA	2	bleomycin	water	CB4856	C	3	q10.EXT	13.2186513888646
NA	H19	NA	NA	2	bleomycin	water	CB4856	C	4	q10.EXT	16.2186513888646
NA	H19	NA	NA	2	bleomycin	water	ECA1135	C	5	q10.EXT	-8.9847175593467
NA	H19	NA	NA	2	bleomycin	water	ECA1135	C	6	q10.EXT	-6.18471755934669
NA	H19	NA	NA	2	bleomycin	water	ECA1132	C	7	q10.EXT	-14.1901869173622
NA	H19	NA	NA	2	bleomycin	water	ECA1132	C	8	q10.EXT	-13.3901869173622
NA	H19	NA	NA	2	bleomycin	water	ECA1133	C	9	q10.EXT	14.121234243387
NA	H19	NA	NA	2	bleomycin	water	N2	D	1	q10.EXT	-2.86027136115145
NA	H19	NA	NA	2	bleomycin	water	ECA1133	D	10	q10.EXT	14.721234243387
NA	H19	NA	NA	2	bleomycin	water	ECA1134	D	11	q10.EXT	12.2210358391264
NA	H19	NA	NA	2	bleomycin	water	ECA1134	D	12	q10.EXT	13.8210358391264
NA	H19	NA	NA	2	bleomycin	water	N2	D	2	q10.EXT	-7.06027136115145
NA	H19	NA	NA	2	bleomycin	water	CB4856	D	3	q10.EXT	22.2186513888646
NA	H19	NA	NA	2	bleomycin	water	CB4856	D	4	q10.EXT	14.7186513888646
NA	H19	NA	NA	2	bleomycin	water	ECA1135	D	5	q10.EXT	-11.5847175593467
NA	H19	NA	NA	2	bleomycin	water	ECA1135	D	6	q10.EXT	-13.6847175593467
NA	H19	NA	NA	2	bleomycin	water	ECA1132	D	7	q10.EXT	-14.0901869173622
NA	H19	NA	NA	2	bleomycin	water	ECA1132	D	8	q10.EXT	-12.1901869173622
NA	H19	NA	NA	2	bleomycin	water	ECA1133	D	9	q10.EXT	18.121234243387
NA	H19	NA	NA	2	bleomycin	water	N2	E	1	q10.EXT	-4.86027136115145
NA	H19	NA	NA	2	bleomycin	water	ECA1133	E	10	q10.EXT	15.121234243387
NA	H19	NA	NA	2	bleomycin	water	ECA1134	E	11	q10.EXT	11.1210358391264
NA	H19	NA	NA	2	bleomycin	water	ECA1134	E	12	q10.EXT	14.8210358391264
NA	H19	NA	NA	2	bleomycin	water	N2	E	2	q10.EXT	-10.8602713611515
NA	H19	NA	NA	2	bleomycin	water	CB4856	E	3	q10.EXT	14.2186513888646
NA	H19	NA	NA	2	bleomycin	water	CB4856	E	4	q10.EXT	19.2186513888646
NA	H19	NA	NA	2	bleomycin	water	ECA1135	E	5	q10.EXT	-10.9847175593467
NA	H19	NA	NA	2	bleomycin	water	ECA1135	E	6	q10.EXT	-12.9847175593467
NA	H19	NA	NA	2	bleomycin	water	ECA1132	E	7	q10.EXT	-11.9901869173622
NA	H19	NA	NA	2	bleomycin	water	ECA1132	E	8	q10.EXT	-12.0901869173622
NA	H19	NA	NA	2	bleomycin	water	ECA1133	E	9	q10.EXT	16.121234243387
NA	H19	NA	NA	2	bleomycin	water	N2	F	1	q10.EXT	-4.86027136115145
NA	H19	NA	NA	2	bleomycin	water	ECA1133	F	10	q10.EXT	12.121234243387
NA	H19	NA	NA	2	bleomycin	water	ECA1134	F	12	q10.EXT	12.6210358391264
NA	H19	NA	NA	2	bleomycin	water	N2	F	2	q10.EXT	-0.86027136115145
NA	H19	NA	NA	2	bleomycin	water	CB4856	F	3	q10.EXT	12.2186513888646
NA	H19	NA	NA	2	bleomycin	water	CB4856	F	4	q10.EXT	13.2186513888646
NA	H19	NA	NA	2	bleomycin	water	ECA1135	F	5	q10.EXT	-15.1847175593467
NA	H19	NA	NA	2	bleomycin	water	ECA1135	F	6	q10.EXT	-12.7847175593467
NA	H19	NA	NA	2	bleomycin	water	ECA1132	F	7	q10.EXT	-14.9901869173622
NA	H19	NA	NA	2	bleomycin	water	ECA1132	F	8	q10.EXT	-14.9901869173622
NA	H19	NA	NA	2	bleomycin	water	ECA1133	F	9	q10.EXT	12.121234243387
NA	H19	NA	NA	2	bleomycin	water	N2	G	1	q10.EXT	-4.86027136115145
NA	H19	NA	NA	2	bleomycin	water	ECA1133	G	10	q10.EXT	14.121234243387
NA	H19	NA	NA	2	bleomycin	water	ECA1134	G	11	q10.EXT	13.8210358391264
NA	H19	NA	NA	2	bleomycin	water	ECA1134	G	12	q10.EXT	14.1210358391264
NA	H19	NA	NA	2	bleomycin	water	N2	G	2	q10.EXT	-6.06027136115144
NA	H19	NA	NA	2	bleomycin	water	CB4856	G	3	q10.EXT	17.3186513888646
NA	H19	NA	NA	2	bleomycin	water	CB4856	G	4	q10.EXT	22.1186513888646
NA	H19	NA	NA	2	bleomycin	water	ECA1135	G	5	q10.EXT	-10.9847175593467
NA	H19	NA	NA	2	bleomycin	water	ECA1135	G	6	q10.EXT	-9.9847175593467
NA	H19	NA	NA	2	bleomycin	water	ECA1132	G	7	q10.EXT	-10.9901869173622
NA	H19	NA	NA	2	bleomycin	water	ECA1132	G	8	q10.EXT	-8.99018691736219
NA	H19	NA	NA	2	bleomycin	water	ECA1133	G	9	q10.EXT	19.121234243387
NA	H19	NA	NA	4	bleomycin	water	N2	A	1	q10.EXT	-6.86027136115145
NA	H19	NA	NA	4	bleomycin	water	ECA1133	A	10	q10.EXT	10.121234243387
NA	H19	NA	NA	4	bleomycin	water	ECA1134	A	12	q10.EXT	12.8210358391264
NA	H19	NA	NA	4	bleomycin	water	N2	A	2	q10.EXT	-4.86027136115145
NA	H19	NA	NA	4	bleomycin	water	CB4856	A	3	q10.EXT	13.8186513888646
NA	H19	NA	NA	4	bleomycin	water	CB4856	A	4	q10.EXT	12.2186513888646
NA	H19	NA	NA	4	bleomycin	water	ECA1135	A	5	q10.EXT	-10.1847175593467
NA	H19	NA	NA	4	bleomycin	water	ECA1135	A	6	q10.EXT	-9.9847175593467
NA	H19	NA	NA	4	bleomycin	water	ECA1132	A	7	q10.EXT	-15.9901869173622
NA	H19	NA	NA	4	bleomycin	water	ECA1133	A	9	q10.EXT	13.121234243387
NA	H19	NA	NA	4	bleomycin	water	N2	B	1	q10.EXT	0.739728638848558
NA	H19	NA	NA	4	bleomycin	water	ECA1133	B	10	q10.EXT	9.12123424338699
NA	H19	NA	NA	4	bleomycin	water	ECA1134	B	11	q10.EXT	9.82103583912638
NA	H19	NA	NA	4	bleomycin	water	ECA1134	B	12	q10.EXT	13.8210358391264
NA	H19	NA	NA	4	bleomycin	water	N2	B	2	q10.EXT	-2.86027136115145
NA	H19	NA	NA	4	bleomycin	water	CB4856	B	3	q10.EXT	7.0186513888646
NA	H19	NA	NA	4	bleomycin	water	CB4856	B	4	q10.EXT	8.2186513888646
NA	H19	NA	NA	4	bleomycin	water	ECA1135	B	5	q10.EXT	-16.9847175593467
NA	H19	NA	NA	4	bleomycin	water	ECA1135	B	6	q10.EXT	-11.9847175593467
NA	H19	NA	NA	4	bleomycin	water	ECA1132	B	7	q10.EXT	-14.3901869173622
NA	H19	NA	NA	4	bleomycin	water	ECA1132	B	8	q10.EXT	-14.9901869173622
NA	H19	NA	NA	4	bleomycin	water	ECA1133	B	9	q10.EXT	9.12123424338699
NA	H19	NA	NA	4	bleomycin	water	N2	C	1	q10.EXT	-5.86027136115145
NA	H19	NA	NA	4	bleomycin	water	ECA1133	C	10	q10.EXT	11.121234243387
NA	H19	NA	NA	4	bleomycin	water	ECA1134	C	11	q10.EXT	9.62103583912638
NA	H19	NA	NA	4	bleomycin	water	ECA1134	C	12	q10.EXT	11.8210358391264
NA	H19	NA	NA	4	bleomycin	water	N2	C	2	q10.EXT	-6.86027136115145
NA	H19	NA	NA	4	bleomycin	water	CB4856	C	3	q10.EXT	11.2186513888646
NA	H19	NA	NA	4	bleomycin	water	CB4856	C	4	q10.EXT	9.2186513888646
NA	H19	NA	NA	4	bleomycin	water	ECA1135	C	5	q10.EXT	-12.9847175593467
NA	H19	NA	NA	4	bleomycin	water	ECA1135	C	6	q10.EXT	-12.9847175593467
NA	H19	NA	NA	4	bleomycin	water	ECA1132	C	7	q10.EXT	-12.3901869173622
NA	H19	NA	NA	4	bleomycin	water	ECA1132	C	8	q10.EXT	-11.9901869173622
NA	H19	NA	NA	4	bleomycin	water	ECA1133	C	9	q10.EXT	13.121234243387
NA	H19	NA	NA	4	bleomycin	water	N2	D	1	q10.EXT	-10.6602713611514
NA	H19	NA	NA	4	bleomycin	water	ECA1133	D	10	q10.EXT	7.421234243387
NA	H19	NA	NA	4	bleomycin	water	ECA1134	D	11	q10.EXT	7.12103583912638
NA	H19	NA	NA	4	bleomycin	water	ECA1134	D	12	q10.EXT	11.8210358391264
NA	H19	NA	NA	4	bleomycin	water	N2	D	2	q10.EXT	-4.26027136115146
NA	H19	NA	NA	4	bleomycin	water	CB4856	D	3	q10.EXT	11.1186513888646
NA	H19	NA	NA	4	bleomycin	water	CB4856	D	4	q10.EXT	8.2186513888646
NA	H19	NA	NA	4	bleomycin	water	ECA1135	D	5	q10.EXT	-11.9847175593467
NA	H19	NA	NA	4	bleomycin	water	ECA1135	D	6	q10.EXT	-10.8847175593467
NA	H19	NA	NA	4	bleomycin	water	ECA1132	D	7	q10.EXT	-17.7901869173622
NA	H19	NA	NA	4	bleomycin	water	ECA1132	D	8	q10.EXT	-12.9901869173622
NA	H19	NA	NA	4	bleomycin	water	ECA1133	D	9	q10.EXT	15.121234243387
NA	H19	NA	NA	4	bleomycin	water	N2	E	1	q10.EXT	-9.86027136115145
NA	H19	NA	NA	4	bleomycin	water	ECA1133	E	10	q10.EXT	13.121234243387
NA	H19	NA	NA	4	bleomycin	water	ECA1134	E	11	q10.EXT	6.82103583912638
NA	H19	NA	NA	4	bleomycin	water	ECA1134	E	12	q10.EXT	10.2210358391264
NA	H19	NA	NA	4	bleomycin	water	N2	E	2	q10.EXT	-4.26027136115146
NA	H19	NA	NA	4	bleomycin	water	CB4856	E	3	q10.EXT	11.8186513888646
NA	H19	NA	NA	4	bleomycin	water	CB4856	E	4	q10.EXT	9.2186513888646
NA	H19	NA	NA	4	bleomycin	water	ECA1135	E	5	q10.EXT	-15.9847175593467
NA	H19	NA	NA	4	bleomycin	water	ECA1135	E	6	q10.EXT	-15.9847175593467
NA	H19	NA	NA	4	bleomycin	water	ECA1132	E	7	q10.EXT	-13.1901869173622
NA	H19	NA	NA	4	bleomycin	water	ECA1132	E	8	q10.EXT	-9.99018691736219
NA	H19	NA	NA	4	bleomycin	water	ECA1133	E	9	q10.EXT	13.321234243387
NA	H19	NA	NA	4	bleomycin	water	N2	F	1	q10.EXT	-7.86027136115145
NA	H19	NA	NA	4	bleomycin	water	ECA1133	F	10	q10.EXT	11.121234243387
NA	H19	NA	NA	4	bleomycin	water	ECA1134	F	11	q10.EXT	7.12103583912639
NA	H19	NA	NA	4	bleomycin	water	ECA1134	F	12	q10.EXT	11.0210358391264
NA	H19	NA	NA	4	bleomycin	water	CB4856	F	3	q10.EXT	8.0186513888646
NA	H19	NA	NA	4	bleomycin	water	CB4856	F	4	q10.EXT	11.2186513888646
NA	H19	NA	NA	4	bleomycin	water	ECA1135	F	6	q10.EXT	-11.1847175593467
NA	H19	NA	NA	4	bleomycin	water	ECA1132	F	7	q10.EXT	-17.3901869173622
NA	H19	NA	NA	4	bleomycin	water	ECA1132	F	8	q10.EXT	-9.99018691736219
NA	H19	NA	NA	4	bleomycin	water	ECA1133	F	9	q10.EXT	17.121234243387
NA	H19	NA	NA	4	bleomycin	water	N2	G	1	q10.EXT	-8.86027136115145
NA	H19	NA	NA	4	bleomycin	water	ECA1133	G	10	q10.EXT	11.121234243387
NA	H19	NA	NA	4	bleomycin	water	ECA1134	G	11	q10.EXT	11.8210358391264
NA	H19	NA	NA	4	bleomycin	water	ECA1134	G	12	q10.EXT	9.92103583912638
NA	H19	NA	NA	4	bleomycin	water	N2	G	2	q10.EXT	0.13972863884855
NA	H19	NA	NA	4	bleomycin	water	CB4856	G	3	q10.EXT	4.9186513888646
NA	H19	NA	NA	4	bleomycin	water	CB4856	G	4	q10.EXT	9.2186513888646
NA	H19	NA	NA	4	bleomycin	water	ECA1135	G	5	q10.EXT	-12.6847175593467
NA	H19	NA	NA	4	bleomycin	water	ECA1135	G	6	q10.EXT	-7.58471755934669
NA	H19	NA	NA	4	bleomycin	water	ECA1132	G	7	q10.EXT	-11.9901869173622
NA	H19	NA	NA	4	bleomycin	water	ECA1132	G	8	q10.EXT	-14.9901869173622
NA	H19	NA	NA	4	bleomycin	water	ECA1133	G	9	q10.EXT	10.121234243387
NA	H19	NA	NA	2	bleomycin	water	N2	A	1	q25.EXT	-1.81396491427183
NA	H19	NA	NA	2	bleomycin	water	ECA1133	A	10	q25.EXT	8.16397950613427
NA	H19	NA	NA	2	bleomycin	water	ECA1134	A	11	q25.EXT	6.37149173589029
NA	H19	NA	NA	2	bleomycin	water	N2	A	2	q25.EXT	-4.8139649142721
NA	H19	NA	NA	2	bleomycin	water	CB4856	A	3	q25.EXT	26.1509589187343
NA	H19	NA	NA	2	bleomycin	water	ECA1135	A	5	q25.EXT	-11.2117221647314
NA	H19	NA	NA	2	bleomycin	water	ECA1135	A	6	q25.EXT	-7.71172216473142
NA	H19	NA	NA	2	bleomycin	water	ECA1132	A	8	q25.EXT	-16.1710462317335
NA	H19	NA	NA	2	bleomycin	water	N2	B	1	q25.EXT	-1.81396491427183
NA	H19	NA	NA	2	bleomycin	water	ECA1133	B	10	q25.EXT	8.16397950613427
NA	H19	NA	NA	2	bleomycin	water	ECA1134	B	11	q25.EXT	5.37149173589029
NA	H19	NA	NA	2	bleomycin	water	N2	B	2	q25.EXT	-11.8139649142721
NA	H19	NA	NA	2	bleomycin	water	CB4856	B	3	q25.EXT	21.1509589187343
NA	H19	NA	NA	2	bleomycin	water	CB4856	B	4	q25.EXT	30.1509589187343
NA	H19	NA	NA	2	bleomycin	water	ECA1135	B	5	q25.EXT	-8.46172216473142
NA	H19	NA	NA	2	bleomycin	water	ECA1135	B	6	q25.EXT	-8.71172216473142
NA	H19	NA	NA	2	bleomycin	water	ECA1132	B	7	q25.EXT	-13.4210462317335
NA	H19	NA	NA	2	bleomycin	water	ECA1132	B	8	q25.EXT	-12.4210462317335
NA	H19	NA	NA	2	bleomycin	water	ECA1133	B	9	q25.EXT	10.1639795061343
NA	H19	NA	NA	2	bleomycin	water	N2	C	1	q25.EXT	-7.0639649142721
NA	H19	NA	NA	2	bleomycin	water	ECA1133	C	10	q25.EXT	7.16397950613427
NA	H19	NA	NA	2	bleomycin	water	ECA1134	C	11	q25.EXT	7.37149173589029
NA	H19	NA	NA	2	bleomycin	water	ECA1134	C	12	q25.EXT	3.37149173589029
NA	H19	NA	NA	2	bleomycin	water	N2	C	2	q25.EXT	2.1860350857279
NA	H19	NA	NA	2	bleomycin	water	CB4856	C	3	q25.EXT	27.1509589187343
NA	H19	NA	NA	2	bleomycin	water	CB4856	C	4	q25.EXT	27.1509589187343
NA	H19	NA	NA	2	bleomycin	water	ECA1135	C	5	q25.EXT	-9.21172216473142
NA	H19	NA	NA	2	bleomycin	water	ECA1132	C	7	q25.EXT	-16.1710462317335
NA	H19	NA	NA	2	bleomycin	water	ECA1132	C	8	q25.EXT	-15.4210462317335
NA	H19	NA	NA	2	bleomycin	water	ECA1133	C	9	q25.EXT	8.16397950613427
NA	H19	NA	NA	2	bleomycin	water	N2	D	1	q25.EXT	0.186035085727902
NA	H19	NA	NA	2	bleomycin	water	ECA1133	D	10	q25.EXT	10.1639795061343
NA	H19	NA	NA	2	bleomycin	water	ECA1134	D	11	q25.EXT	5.37149173589029
NA	H19	NA	NA	2	bleomycin	water	ECA1134	D	12	q25.EXT	5.62149173589029
NA	H19	NA	NA	2	bleomycin	water	N2	D	2	q25.EXT	-5.8139649142721
NA	H19	NA	NA	2	bleomycin	water	CB4856	D	3	q25.EXT	38.1509589187342
NA	H19	NA	NA	2	bleomycin	water	CB4856	D	4	q25.EXT	26.1509589187343
NA	H19	NA	NA	2	bleomycin	water	ECA1135	D	5	q25.EXT	-8.21172216473142
NA	H19	NA	NA	2	bleomycin	water	ECA1135	D	6	q25.EXT	-9.21172216473142
NA	H19	NA	NA	2	bleomycin	water	ECA1132	D	7	q25.EXT	-12.6710462317335
NA	H19	NA	NA	2	bleomycin	water	ECA1132	D	8	q25.EXT	-10.4210462317335
NA	H19	NA	NA	2	bleomycin	water	ECA1133	D	9	q25.EXT	10.1639795061343
NA	H19	NA	NA	2	bleomycin	water	N2	E	1	q25.EXT	-5.8139649142721
NA	H19	NA	NA	2	bleomycin	water	ECA1133	E	10	q25.EXT	8.41397950613427
NA	H19	NA	NA	2	bleomycin	water	ECA1134	E	11	q25.EXT	6.62149173589029
NA	H19	NA	NA	2	bleomycin	water	ECA1134	E	12	q25.EXT	8.37149173589029
NA	H19	NA	NA	2	bleomycin	water	N2	E	2	q25.EXT	-7.8139649142721
NA	H19	NA	NA	2	bleomycin	water	CB4856	E	3	q25.EXT	24.1509589187343
NA	H19	NA	NA	2	bleomycin	water	CB4856	E	4	q25.EXT	40.1509589187342
NA	H19	NA	NA	2	bleomycin	water	ECA1135	E	5	q25.EXT	-10.2117221647314
NA	H19	NA	NA	2	bleomycin	water	ECA1135	E	6	q25.EXT	-11.4617221647314
NA	H19	NA	NA	2	bleomycin	water	ECA1132	E	7	q25.EXT	-13.4210462317335
NA	H19	NA	NA	2	bleomycin	water	ECA1132	E	8	q25.EXT	-10.1710462317335
NA	H19	NA	NA	2	bleomycin	water	ECA1133	E	9	q25.EXT	10.1639795061343
NA	H19	NA	NA	2	bleomycin	water	N2	F	1	q25.EXT	-6.8139649142721
NA	H19	NA	NA	2	bleomycin	water	ECA1133	F	10	q25.EXT	5.16397950613427
NA	H19	NA	NA	2	bleomycin	water	ECA1134	F	11	q25.EXT	9.37149173589029
NA	H19	NA	NA	2	bleomycin	water	ECA1134	F	12	q25.EXT	7.37149173589029
NA	H19	NA	NA	2	bleomycin	water	N2	F	2	q25.EXT	7.4360350857279
NA	H19	NA	NA	2	bleomycin	water	CB4856	F	3	q25.EXT	37.6509589187342
NA	H19	NA	NA	2	bleomycin	water	CB4856	F	4	q25.EXT	26.1509589187343
NA	H19	NA	NA	2	bleomycin	water	ECA1135	F	5	q25.EXT	-9.21172216473142
NA	H19	NA	NA	2	bleomycin	water	ECA1135	F	6	q25.EXT	-9.21172216473142
NA	H19	NA	NA	2	bleomycin	water	ECA1132	F	7	q25.EXT	-12.4210462317335
NA	H19	NA	NA	2	bleomycin	water	ECA1132	F	8	q25.EXT	-15.4210462317335
NA	H19	NA	NA	2	bleomycin	water	ECA1133	F	9	q25.EXT	5.16397950613427
NA	H19	NA	NA	2	bleomycin	water	N2	G	1	q25.EXT	-3.8139649142721
NA	H19	NA	NA	2	bleomycin	water	ECA1133	G	10	q25.EXT	6.16397950613427
NA	H19	NA	NA	2	bleomycin	water	ECA1134	G	11	q25.EXT	6.37149173589029
NA	H19	NA	NA	2	bleomycin	water	ECA1134	G	12	q25.EXT	9.12149173589029
NA	H19	NA	NA	2	bleomycin	water	N2	G	2	q25.EXT	-4.8139649142721
NA	H19	NA	NA	2	bleomycin	water	CB4856	G	3	q25.EXT	30.1509589187343
NA	H19	NA	NA	2	bleomycin	water	ECA1135	G	5	q25.EXT	-11.2117221647314
NA	H19	NA	NA	2	bleomycin	water	ECA1135	G	6	q25.EXT	-8.21172216473142
NA	H19	NA	NA	2	bleomycin	water	ECA1132	G	7	q25.EXT	-11.1710462317335
NA	H19	NA	NA	2	bleomycin	water	ECA1132	G	8	q25.EXT	-7.42104623173351
NA	H19	NA	NA	2	bleomycin	water	ECA1133	G	9	q25.EXT	12.1639795061343
NA	H19	NA	NA	4	bleomycin	water	N2	A	1	q25.EXT	-6.8139649142721
NA	H19	NA	NA	4	bleomycin	water	ECA1133	A	10	q25.EXT	3.16397950613427
NA	H19	NA	NA	4	bleomycin	water	ECA1134	A	11	q25.EXT	0.37149173589029
NA	H19	NA	NA	4	bleomycin	water	ECA1134	A	12	q25.EXT	5.37149173589029
NA	H19	NA	NA	4	bleomycin	water	N2	A	2	q25.EXT	-4.8139649142721
NA	H19	NA	NA	4	bleomycin	water	CB4856	A	3	q25.EXT	19.1509589187343
NA	H19	NA	NA	4	bleomycin	water	CB4856	A	4	q25.EXT	16.1509589187343
NA	H19	NA	NA	4	bleomycin	water	ECA1135	A	5	q25.EXT	-9.21172216473142
NA	H19	NA	NA	4	bleomycin	water	ECA1135	A	6	q25.EXT	-9.21172216473142
NA	H19	NA	NA	4	bleomycin	water	ECA1132	A	7	q25.EXT	-18.4210462317335
NA	H19	NA	NA	4	bleomycin	water	ECA1132	A	8	q25.EXT	-8.67104623173351
NA	H19	NA	NA	4	bleomycin	water	ECA1133	A	9	q25.EXT	7.16397950613427
NA	H19	NA	NA	4	bleomycin	water	N2	B	1	q25.EXT	3.9360350857279
NA	H19	NA	NA	4	bleomycin	water	ECA1133	B	10	q25.EXT	2.91397950613427
NA	H19	NA	NA	4	bleomycin	water	ECA1134	B	11	q25.EXT	2.37149173589029
NA	H19	NA	NA	4	bleomycin	water	ECA1134	B	12	q25.EXT	5.37149173589029
NA	H19	NA	NA	4	bleomycin	water	N2	B	2	q25.EXT	-3.8139649142721
NA	H19	NA	NA	4	bleomycin	water	CB4856	B	3	q25.EXT	11.1509589187342
NA	H19	NA	NA	4	bleomycin	water	CB4856	B	4	q25.EXT	15.1509589187342
NA	H19	NA	NA	4	bleomycin	water	ECA1135	B	5	q25.EXT	-14.2117221647314
NA	H19	NA	NA	4	bleomycin	water	ECA1135	B	6	q25.EXT	-12.2117221647314
NA	H19	NA	NA	4	bleomycin	water	ECA1132	B	7	q25.EXT	-8.92104623173351
NA	H19	NA	NA	4	bleomycin	water	ECA1132	B	8	q25.EXT	-16.4210462317335
NA	H19	NA	NA	4	bleomycin	water	ECA1133	B	9	q25.EXT	4.16397950613427
NA	H19	NA	NA	4	bleomycin	water	N2	C	1	q25.EXT	-6.3139649142721
NA	H19	NA	NA	4	bleomycin	water	ECA1133	C	10	q25.EXT	6.16397950613427
NA	H19	NA	NA	4	bleomycin	water	ECA1134	C	11	q25.EXT	3.37149173589029
NA	H19	NA	NA	4	bleomycin	water	ECA1134	C	12	q25.EXT	3.37149173589029
NA	H19	NA	NA	4	bleomycin	water	N2	C	2	q25.EXT	-7.8139649142721
NA	H19	NA	NA	4	bleomycin	water	CB4856	C	3	q25.EXT	14.1509589187342
NA	H19	NA	NA	4	bleomycin	water	CB4856	C	4	q25.EXT	16.4009589187343
NA	H19	NA	NA	4	bleomycin	water	ECA1135	C	5	q25.EXT	-10.4617221647314
NA	H19	NA	NA	4	bleomycin	water	ECA1135	C	6	q25.EXT	-12.2117221647314
NA	H19	NA	NA	4	bleomycin	water	ECA1132	C	7	q25.EXT	-16.4210462317335
NA	H19	NA	NA	4	bleomycin	water	ECA1132	C	8	q25.EXT	-12.1710462317335
NA	H19	NA	NA	4	bleomycin	water	ECA1133	C	9	q25.EXT	5.16397950613427
NA	H19	NA	NA	4	bleomycin	water	N2	D	1	q25.EXT	-11.8139649142721
NA	H19	NA	NA	4	bleomycin	water	ECA1133	D	10	q25.EXT	2.41397950613427
NA	H19	NA	NA	4	bleomycin	water	ECA1134	D	11	q25.EXT	1.37149173589029
NA	H19	NA	NA	4	bleomycin	water	ECA1134	D	12	q25.EXT	4.37149173589029
NA	H19	NA	NA	4	bleomycin	water	N2	D	2	q25.EXT	-4.8139649142721
NA	H19	NA	NA	4	bleomycin	water	CB4856	D	3	q25.EXT	14.1509589187342
NA	H19	NA	NA	4	bleomycin	water	CB4856	D	4	q25.EXT	11.1509589187342
NA	H19	NA	NA	4	bleomycin	water	ECA1135	D	5	q25.EXT	-6.71172216473142
NA	H19	NA	NA	4	bleomycin	water	ECA1135	D	6	q25.EXT	-9.96172216473142
NA	H19	NA	NA	4	bleomycin	water	ECA1132	D	7	q25.EXT	-17.4210462317335
NA	H19	NA	NA	4	bleomycin	water	ECA1132	D	8	q25.EXT	-11.4210462317335
NA	H19	NA	NA	4	bleomycin	water	ECA1133	D	9	q25.EXT	8.16397950613427
NA	H19	NA	NA	4	bleomycin	water	N2	E	1	q25.EXT	-7.0639649142721
NA	H19	NA	NA	4	bleomycin	water	ECA1133	E	10	q25.EXT	5.16397950613427
NA	H19	NA	NA	4	bleomycin	water	ECA1134	E	11	q25.EXT	1.37149173589029
NA	H19	NA	NA	4	bleomycin	water	ECA1134	E	12	q25.EXT	2.37149173589029
NA	H19	NA	NA	4	bleomycin	water	N2	E	2	q25.EXT	-2.8139649142721
NA	H19	NA	NA	4	bleomycin	water	CB4856	E	3	q25.EXT	19.1509589187343
NA	H19	NA	NA	4	bleomycin	water	CB4856	E	4	q25.EXT	19.1509589187343
NA	H19	NA	NA	4	bleomycin	water	ECA1135	E	5	q25.EXT	-14.2117221647314
NA	H19	NA	NA	4	bleomycin	water	ECA1135	E	6	q25.EXT	-13.2117221647314
NA	H19	NA	NA	4	bleomycin	water	ECA1132	E	7	q25.EXT	-15.1710462317335
NA	H19	NA	NA	4	bleomycin	water	ECA1132	E	8	q25.EXT	-11.4210462317335
NA	H19	NA	NA	4	bleomycin	water	ECA1133	E	9	q25.EXT	7.16397950613427
NA	H19	NA	NA	4	bleomycin	water	N2	F	1	q25.EXT	-7.8139649142721
NA	H19	NA	NA	4	bleomycin	water	ECA1133	F	10	q25.EXT	6.16397950613427
NA	H19	NA	NA	4	bleomycin	water	ECA1134	F	11	q25.EXT	4.37149173589029
NA	H19	NA	NA	4	bleomycin	water	ECA1134	F	12	q25.EXT	4.37149173589029
NA	H19	NA	NA	4	bleomycin	water	CB4856	F	3	q25.EXT	12.1509589187342
NA	H19	NA	NA	4	bleomycin	water	CB4856	F	4	q25.EXT	16.1509589187343
NA	H19	NA	NA	4	bleomycin	water	ECA1135	F	6	q25.EXT	-8.71172216473142
NA	H19	NA	NA	4	bleomycin	water	ECA1132	F	7	q25.EXT	-15.4210462317335
NA	H19	NA	NA	4	bleomycin	water	ECA1132	F	8	q25.EXT	-10.9210462317335
NA	H19	NA	NA	4	bleomycin	water	ECA1133	F	9	q25.EXT	7.91397950613427
NA	H19	NA	NA	4	bleomycin	water	N2	G	1	q25.EXT	-7.8139649142721
NA	H19	NA	NA	4	bleomycin	water	ECA1133	G	10	q25.EXT	6.16397950613427
NA	H19	NA	NA	4	bleomycin	water	ECA1134	G	11	q25.EXT	2.37149173589029
NA	H19	NA	NA	4	bleomycin	water	ECA1134	G	12	q25.EXT	3.37149173589029
NA	H19	NA	NA	4	bleomycin	water	N2	G	2	q25.EXT	0.186035085727902
NA	H19	NA	NA	4	bleomycin	water	CB4856	G	3	q25.EXT	9.15095891873425
NA	H19	NA	NA	4	bleomycin	water	CB4856	G	4	q25.EXT	16.1509589187343
NA	H19	NA	NA	4	bleomycin	water	ECA1135	G	5	q25.EXT	-10.2117221647314
NA	H19	NA	NA	4	bleomycin	water	ECA1135	G	6	q25.EXT	-9.21172216473142
NA	H19	NA	NA	4	bleomycin	water	ECA1132	G	7	q25.EXT	-12.4210462317335
NA	H19	NA	NA	4	bleomycin	water	ECA1132	G	8	q25.EXT	-16.4210462317335
NA	H19	NA	NA	4	bleomycin	water	ECA1133	G	9	q25.EXT	3.91397950613427
NA	H19	NA	NA	2	bleomycin	water	N2	A	1	median.EXT	2.62369976926809
NA	H19	NA	NA	2	bleomycin	water	ECA1133	A	10	median.EXT	-4.63123416437013
NA	H19	NA	NA	2	bleomycin	water	ECA1134	A	11	median.EXT	-2.3122858845038
NA	H19	NA	NA	2	bleomycin	water	N2	A	2	median.EXT	-4.37630023073177
NA	H19	NA	NA	2	bleomycin	water	CB4856	A	3	median.EXT	31.0122650013625
NA	H19	NA	NA	2	bleomycin	water	CB4856	A	4	median.EXT	74.0122650013626
NA	H19	NA	NA	2	bleomycin	water	ECA1135	A	5	median.EXT	-7.15095826754781
NA	H19	NA	NA	2	bleomycin	water	ECA1135	A	6	median.EXT	-7.15095826754781
NA	H19	NA	NA	2	bleomycin	water	ECA1132	A	8	median.EXT	-13.885913118996
NA	H19	NA	NA	2	bleomycin	water	ECA1133	A	9	median.EXT	-0.631234164370126
NA	H19	NA	NA	2	bleomycin	water	N2	B	1	median.EXT	0.123699769268232
NA	H19	NA	NA	2	bleomycin	water	ECA1133	B	10	median.EXT	-3.63123416437013
NA	H19	NA	NA	2	bleomycin	water	ECA1134	B	11	median.EXT	-4.8122858845038
NA	H19	NA	NA	2	bleomycin	water	N2	B	2	median.EXT	-4.87630023073177
NA	H19	NA	NA	2	bleomycin	water	CB4856	B	3	median.EXT	35.5122650013626
NA	H19	NA	NA	2	bleomycin	water	CB4856	B	4	median.EXT	47.5122650013626
NA	H19	NA	NA	2	bleomycin	water	ECA1135	B	5	median.EXT	-8.15095826754781
NA	H19	NA	NA	2	bleomycin	water	ECA1135	B	6	median.EXT	-8.15095826754781
NA	H19	NA	NA	2	bleomycin	water	ECA1132	B	7	median.EXT	-3.38591311899596
NA	H19	NA	NA	2	bleomycin	water	ECA1132	B	8	median.EXT	-13.385913118996
NA	H19	NA	NA	2	bleomycin	water	ECA1133	B	9	median.EXT	-2.13123416437013
NA	H19	NA	NA	2	bleomycin	water	N2	C	1	median.EXT	0.623699769268232
NA	H19	NA	NA	2	bleomycin	water	ECA1133	C	10	median.EXT	-6.63123416437013
NA	H19	NA	NA	2	bleomycin	water	ECA1134	C	11	median.EXT	-3.8122858845038
NA	H19	NA	NA	2	bleomycin	water	ECA1134	C	12	median.EXT	-1.8122858845038
NA	H19	NA	NA	2	bleomycin	water	N2	C	2	median.EXT	5.12369976926823
NA	H19	NA	NA	2	bleomycin	water	CB4856	C	3	median.EXT	59.5122650013626
NA	H19	NA	NA	2	bleomycin	water	CB4856	C	4	median.EXT	41.5122650013626
NA	H19	NA	NA	2	bleomycin	water	ECA1135	C	5	median.EXT	-5.15095826754781
NA	H19	NA	NA	2	bleomycin	water	ECA1132	C	8	median.EXT	-14.385913118996
NA	H19	NA	NA	2	bleomycin	water	ECA1133	C	9	median.EXT	-4.13123416437013
NA	H19	NA	NA	2	bleomycin	water	N2	D	1	median.EXT	2.12369976926823
NA	H19	NA	NA	2	bleomycin	water	ECA1133	D	10	median.EXT	-3.63123416437013
NA	H19	NA	NA	2	bleomycin	water	ECA1134	D	11	median.EXT	-2.8122858845038
NA	H19	NA	NA	2	bleomycin	water	ECA1134	D	12	median.EXT	-5.8122858845038
NA	H19	NA	NA	2	bleomycin	water	N2	D	2	median.EXT	0.123699769268232
NA	H19	NA	NA	2	bleomycin	water	CB4856	D	3	median.EXT	57.5122650013626
NA	H19	NA	NA	2	bleomycin	water	CB4856	D	4	median.EXT	48.0122650013626
NA	H19	NA	NA	2	bleomycin	water	ECA1135	D	5	median.EXT	-6.15095826754781
NA	H19	NA	NA	2	bleomycin	water	ECA1135	D	6	median.EXT	-8.15095826754781
NA	H19	NA	NA	2	bleomycin	water	ECA1132	D	7	median.EXT	-10.385913118996
NA	H19	NA	NA	2	bleomycin	water	ECA1132	D	8	median.EXT	-12.385913118996
NA	H19	NA	NA	2	bleomycin	water	ECA1133	D	9	median.EXT	-4.63123416437013
NA	H19	NA	NA	2	bleomycin	water	N2	E	1	median.EXT	1.12369976926823
NA	H19	NA	NA	2	bleomycin	water	ECA1133	E	10	median.EXT	-0.631234164370126
NA	H19	NA	NA	2	bleomycin	water	ECA1134	E	11	median.EXT	-1.3122858845038
NA	H19	NA	NA	2	bleomycin	water	ECA1134	E	12	median.EXT	-0.812285884503799
NA	H19	NA	NA	2	bleomycin	water	N2	E	2	median.EXT	0.123699769268232
NA	H19	NA	NA	2	bleomycin	water	CB4856	E	3	median.EXT	43.5122650013626
NA	H19	NA	NA	2	bleomycin	water	CB4856	E	4	median.EXT	58.5122650013626
NA	H19	NA	NA	2	bleomycin	water	ECA1135	E	5	median.EXT	-8.15095826754781
NA	H19	NA	NA	2	bleomycin	water	ECA1135	E	6	median.EXT	-9.65095826754781
NA	H19	NA	NA	2	bleomycin	water	ECA1132	E	7	median.EXT	-12.385913118996
NA	H19	NA	NA	2	bleomycin	water	ECA1132	E	8	median.EXT	-8.38591311899596
NA	H19	NA	NA	2	bleomycin	water	ECA1133	E	9	median.EXT	-3.63123416437013
NA	H19	NA	NA	2	bleomycin	water	N2	F	1	median.EXT	0.123699769268232
NA	H19	NA	NA	2	bleomycin	water	ECA1133	F	10	median.EXT	-9.63123416437013
NA	H19	NA	NA	2	bleomycin	water	ECA1134	F	11	median.EXT	-0.812285884503799
NA	H19	NA	NA	2	bleomycin	water	ECA1134	F	12	median.EXT	-0.812285884503799
NA	H19	NA	NA	2	bleomycin	water	N2	F	2	median.EXT	22.6236997692682
NA	H19	NA	NA	2	bleomycin	water	CB4856	F	3	median.EXT	60.5122650013626
NA	H19	NA	NA	2	bleomycin	water	CB4856	F	4	median.EXT	57.5122650013626
NA	H19	NA	NA	2	bleomycin	water	ECA1135	F	5	median.EXT	-6.15095826754781
NA	H19	NA	NA	2	bleomycin	water	ECA1135	F	6	median.EXT	-7.15095826754781
NA	H19	NA	NA	2	bleomycin	water	ECA1132	F	7	median.EXT	-13.385913118996
NA	H19	NA	NA	2	bleomycin	water	ECA1132	F	8	median.EXT	-13.885913118996
NA	H19	NA	NA	2	bleomycin	water	ECA1133	F	9	median.EXT	-7.63123416437013
NA	H19	NA	NA	2	bleomycin	water	N2	G	1	median.EXT	-0.876300230731768
NA	H19	NA	NA	2	bleomycin	water	ECA1133	G	10	median.EXT	-7.63123416437013
NA	H19	NA	NA	2	bleomycin	water	ECA1134	G	11	median.EXT	-0.812285884503799
NA	H19	NA	NA	2	bleomycin	water	ECA1134	G	12	median.EXT	-2.3122858845038
NA	H19	NA	NA	2	bleomycin	water	N2	G	2	median.EXT	9.12369976926823
NA	H19	NA	NA	2	bleomycin	water	CB4856	G	3	median.EXT	45.5122650013626
NA	H19	NA	NA	2	bleomycin	water	ECA1135	G	5	median.EXT	-7.15095826754781
NA	H19	NA	NA	2	bleomycin	water	ECA1135	G	6	median.EXT	-9.15095826754781
NA	H19	NA	NA	2	bleomycin	water	ECA1132	G	7	median.EXT	-8.88591311899596
NA	H19	NA	NA	2	bleomycin	water	ECA1132	G	8	median.EXT	-6.38591311899596
NA	H19	NA	NA	4	bleomycin	water	N2	A	1	median.EXT	-2.37630023073177
NA	H19	NA	NA	4	bleomycin	water	ECA1133	A	10	median.EXT	-10.6312341643701
NA	H19	NA	NA	4	bleomycin	water	ECA1134	A	11	median.EXT	-11.3122858845038
NA	H19	NA	NA	4	bleomycin	water	ECA1134	A	12	median.EXT	-4.8122858845038
NA	H19	NA	NA	4	bleomycin	water	N2	A	2	median.EXT	1.12369976926823
NA	H19	NA	NA	4	bleomycin	water	CB4856	A	3	median.EXT	21.5122650013625
NA	H19	NA	NA	4	bleomycin	water	CB4856	A	4	median.EXT	6.51226500136255
NA	H19	NA	NA	4	bleomycin	water	ECA1135	A	5	median.EXT	-7.15095826754781
NA	H19	NA	NA	4	bleomycin	water	ECA1135	A	6	median.EXT	-7.15095826754781
NA	H19	NA	NA	4	bleomycin	water	ECA1132	A	7	median.EXT	-14.385913118996
NA	H19	NA	NA	4	bleomycin	water	ECA1132	A	8	median.EXT	-6.88591311899596
NA	H19	NA	NA	4	bleomycin	water	ECA1133	A	9	median.EXT	-5.63123416437013
NA	H19	NA	NA	4	bleomycin	water	ECA1133	B	10	median.EXT	-8.63123416437013
NA	H19	NA	NA	4	bleomycin	water	ECA1134	B	11	median.EXT	-7.8122858845038
NA	H19	NA	NA	4	bleomycin	water	ECA1134	B	12	median.EXT	-5.8122858845038
NA	H19	NA	NA	4	bleomycin	water	N2	B	2	median.EXT	6.12369976926823
NA	H19	NA	NA	4	bleomycin	water	CB4856	B	3	median.EXT	0.512265001362547
NA	H19	NA	NA	4	bleomycin	water	CB4856	B	4	median.EXT	16.5122650013625
NA	H19	NA	NA	4	bleomycin	water	ECA1135	B	5	median.EXT	-13.1509582675478
NA	H19	NA	NA	4	bleomycin	water	ECA1135	B	6	median.EXT	-9.15095826754781
NA	H19	NA	NA	4	bleomycin	water	ECA1132	B	7	median.EXT	-10.385913118996
NA	H19	NA	NA	4	bleomycin	water	ECA1132	B	8	median.EXT	-12.385913118996
NA	H19	NA	NA	4	bleomycin	water	ECA1133	B	9	median.EXT	-10.6312341643701
NA	H19	NA	NA	4	bleomycin	water	N2	C	1	median.EXT	-1.87630023073177
NA	H19	NA	NA	4	bleomycin	water	ECA1133	C	10	median.EXT	-8.13123416437013
NA	H19	NA	NA	4	bleomycin	water	ECA1134	C	11	median.EXT	-6.8122858845038
NA	H19	NA	NA	4	bleomycin	water	ECA1134	C	12	median.EXT	-7.8122858845038
NA	H19	NA	NA	4	bleomycin	water	N2	C	2	median.EXT	-3.37630023073177
NA	H19	NA	NA	4	bleomycin	water	CB4856	C	3	median.EXT	14.5122650013625
NA	H19	NA	NA	4	bleomycin	water	CB4856	C	4	median.EXT	16.5122650013625
NA	H19	NA	NA	4	bleomycin	water	ECA1135	C	5	median.EXT	-9.65095826754781
NA	H19	NA	NA	4	bleomycin	water	ECA1135	C	6	median.EXT	-8.15095826754781
NA	H19	NA	NA	4	bleomycin	water	ECA1132	C	7	median.EXT	-13.385913118996
NA	H19	NA	NA	4	bleomycin	water	ECA1132	C	8	median.EXT	-10.885913118996
NA	H19	NA	NA	4	bleomycin	water	ECA1133	C	9	median.EXT	-8.63123416437013
NA	H19	NA	NA	4	bleomycin	water	N2	D	1	median.EXT	-3.87630023073177
NA	H19	NA	NA	4	bleomycin	water	ECA1133	D	10	median.EXT	-11.6312341643701
NA	H19	NA	NA	4	bleomycin	water	ECA1134	D	11	median.EXT	-8.3122858845038
NA	H19	NA	NA	4	bleomycin	water	ECA1134	D	12	median.EXT	-6.8122858845038
NA	H19	NA	NA	4	bleomycin	water	N2	D	2	median.EXT	0.123699769268232
NA	H19	NA	NA	4	bleomycin	water	CB4856	D	3	median.EXT	11.5122650013625
NA	H19	NA	NA	4	bleomycin	water	CB4856	D	4	median.EXT	1.01226500136255
NA	H19	NA	NA	4	bleomycin	water	ECA1135	D	5	median.EXT	-7.15095826754781
NA	H19	NA	NA	4	bleomycin	water	ECA1135	D	6	median.EXT	-9.15095826754781
NA	H19	NA	NA	4	bleomycin	water	ECA1132	D	7	median.EXT	-13.385913118996
NA	H19	NA	NA	4	bleomycin	water	ECA1132	D	8	median.EXT	-10.385913118996
NA	H19	NA	NA	4	bleomycin	water	ECA1133	D	9	median.EXT	-6.63123416437013
NA	H19	NA	NA	4	bleomycin	water	N2	E	1	median.EXT	-0.876300230731768
NA	H19	NA	NA	4	bleomycin	water	ECA1133	E	10	median.EXT	-9.63123416437013
NA	H19	NA	NA	4	bleomycin	water	ECA1134	E	11	median.EXT	-9.8122858845038
NA	H19	NA	NA	4	bleomycin	water	ECA1134	E	12	median.EXT	-7.8122858845038
NA	H19	NA	NA	4	bleomycin	water	N2	E	2	median.EXT	4.12369976926823
NA	H19	NA	NA	4	bleomycin	water	CB4856	E	3	median.EXT	23.5122650013625
NA	H19	NA	NA	4	bleomycin	water	CB4856	E	4	median.EXT	33.5122650013626
NA	H19	NA	NA	4	bleomycin	water	ECA1135	E	5	median.EXT	-12.1509582675478
NA	H19	NA	NA	4	bleomycin	water	ECA1135	E	6	median.EXT	-12.1509582675478
NA	H19	NA	NA	4	bleomycin	water	ECA1132	E	7	median.EXT	-16.385913118996
NA	H19	NA	NA	4	bleomycin	water	ECA1132	E	8	median.EXT	-11.385913118996
NA	H19	NA	NA	4	bleomycin	water	ECA1133	E	9	median.EXT	-5.63123416437013
NA	H19	NA	NA	4	bleomycin	water	N2	F	1	median.EXT	-3.87630023073177
NA	H19	NA	NA	4	bleomycin	water	ECA1133	F	10	median.EXT	-8.63123416437013
NA	H19	NA	NA	4	bleomycin	water	ECA1134	F	11	median.EXT	-7.8122858845038
NA	H19	NA	NA	4	bleomycin	water	ECA1134	F	12	median.EXT	-6.8122858845038
NA	H19	NA	NA	4	bleomycin	water	CB4856	F	3	median.EXT	6.51226500136255
NA	H19	NA	NA	4	bleomycin	water	CB4856	F	4	median.EXT	14.5122650013625
NA	H19	NA	NA	4	bleomycin	water	ECA1135	F	6	median.EXT	-10.1509582675478
NA	H19	NA	NA	4	bleomycin	water	ECA1132	F	7	median.EXT	-12.385913118996
NA	H19	NA	NA	4	bleomycin	water	ECA1132	F	8	median.EXT	-8.38591311899596
NA	H19	NA	NA	4	bleomycin	water	ECA1133	F	9	median.EXT	-5.63123416437013
NA	H19	NA	NA	4	bleomycin	water	N2	G	1	median.EXT	-4.87630023073177
NA	H19	NA	NA	4	bleomycin	water	ECA1133	G	10	median.EXT	-8.63123416437013
NA	H19	NA	NA	4	bleomycin	water	ECA1134	G	11	median.EXT	-8.8122858845038
NA	H19	NA	NA	4	bleomycin	water	ECA1134	G	12	median.EXT	-6.8122858845038
NA	H19	NA	NA	4	bleomycin	water	N2	G	2	median.EXT	5.12369976926823
NA	H19	NA	NA	4	bleomycin	water	CB4856	G	3	median.EXT	-0.487734998637453
NA	H19	NA	NA	4	bleomycin	water	CB4856	G	4	median.EXT	12.5122650013625
NA	H19	NA	NA	4	bleomycin	water	ECA1135	G	5	median.EXT	-8.15095826754781
NA	H19	NA	NA	4	bleomycin	water	ECA1135	G	6	median.EXT	-8.15095826754781
NA	H19	NA	NA	4	bleomycin	water	ECA1132	G	7	median.EXT	-14.385913118996
NA	H19	NA	NA	4	bleomycin	water	ECA1132	G	8	median.EXT	-15.885913118996
NA	H19	NA	NA	4	bleomycin	water	ECA1133	G	9	median.EXT	-10.6312341643701
NA	H19	NA	NA	2	bleomycin	water	N2	A	1	q75.EXT	4.93301882136095
NA	H19	NA	NA	2	bleomycin	water	ECA1133	A	10	q75.EXT	-19.8543215944129
NA	H19	NA	NA	2	bleomycin	water	ECA1134	A	11	q75.EXT	-20.9461511887177
NA	H19	NA	NA	2	bleomycin	water	ECA1134	A	12	q75.EXT	-11.9461511887177
NA	H19	NA	NA	2	bleomycin	water	N2	A	2	q75.EXT	1.68301882136051
NA	H19	NA	NA	2	bleomycin	water	CB4856	A	3	q75.EXT	40.3176457825985
NA	H19	NA	NA	2	bleomycin	water	CB4856	A	4	q75.EXT	79.8176457825985
NA	H19	NA	NA	2	bleomycin	water	ECA1135	A	5	q75.EXT	1.38650503838178
NA	H19	NA	NA	2	bleomycin	water	ECA1135	A	6	q75.EXT	-5.61349496161823
NA	H19	NA	NA	2	bleomycin	water	ECA1132	A	8	q75.EXT	-13.6621200898212
NA	H19	NA	NA	2	bleomycin	water	ECA1133	A	9	q75.EXT	-15.8543215944129
NA	H19	NA	NA	2	bleomycin	water	N2	B	1	q75.EXT	5.18301882136051
NA	H19	NA	NA	2	bleomycin	water	ECA1133	B	10	q75.EXT	-20.8543215944129
NA	H19	NA	NA	2	bleomycin	water	ECA1134	B	11	q75.EXT	-23.4461511887177
NA	H19	NA	NA	2	bleomycin	water	N2	B	2	q75.EXT	24.1830188213605
NA	H19	NA	NA	2	bleomycin	water	CB4856	B	3	q75.EXT	55.0676457825985
NA	H19	NA	NA	2	bleomycin	water	CB4856	B	4	q75.EXT	63.5676457825985
NA	H19	NA	NA	2	bleomycin	water	ECA1135	B	5	q75.EXT	11.8865050383818
NA	H19	NA	NA	2	bleomycin	water	ECA1135	B	6	q75.EXT	-0.613494961618225
NA	H19	NA	NA	2	bleomycin	water	ECA1132	B	8	q75.EXT	-11.4121200898212
NA	H19	NA	NA	2	bleomycin	water	ECA1133	B	9	q75.EXT	-11.8543215944129
NA	H19	NA	NA	2	bleomycin	water	N2	C	1	q75.EXT	4.43301882136051
NA	H19	NA	NA	2	bleomycin	water	ECA1133	C	10	q75.EXT	-22.8543215944129
NA	H19	NA	NA	2	bleomycin	water	ECA1134	C	11	q75.EXT	-19.9461511887177
NA	H19	NA	NA	2	bleomycin	water	ECA1134	C	12	q75.EXT	-1.94615118871771
NA	H19	NA	NA	2	bleomycin	water	N2	C	2	q75.EXT	14.1830188213605
NA	H19	NA	NA	2	bleomycin	water	CB4856	C	3	q75.EXT	72.0676457825985
NA	H19	NA	NA	2	bleomycin	water	CB4856	C	4	q75.EXT	54.5676457825985
NA	H19	NA	NA	2	bleomycin	water	ECA1135	C	5	q75.EXT	-1.61349496161822
NA	H19	NA	NA	2	bleomycin	water	ECA1132	C	8	q75.EXT	-12.9121200898212
NA	H19	NA	NA	2	bleomycin	water	ECA1133	C	9	q75.EXT	-20.8543215944129
NA	H19	NA	NA	2	bleomycin	water	N2	D	1	q75.EXT	11.4330188213605
NA	H19	NA	NA	2	bleomycin	water	ECA1133	D	10	q75.EXT	-18.8543215944129
NA	H19	NA	NA	2	bleomycin	water	ECA1134	D	11	q75.EXT	-20.9461511887177
NA	H19	NA	NA	2	bleomycin	water	ECA1134	D	12	q75.EXT	-23.9461511887177
NA	H19	NA	NA	2	bleomycin	water	N2	D	2	q75.EXT	10.1830188213605
NA	H19	NA	NA	2	bleomycin	water	CB4856	D	3	q75.EXT	66.5676457825985
NA	H19	NA	NA	2	bleomycin	water	CB4856	D	4	q75.EXT	49.8176457825985
NA	H19	NA	NA	2	bleomycin	water	ECA1135	D	5	q75.EXT	-2.61349496161822
NA	H19	NA	NA	2	bleomycin	water	ECA1135	D	6	q75.EXT	-5.61349496161823
NA	H19	NA	NA	2	bleomycin	water	ECA1132	D	7	q75.EXT	-9.4121200898212
NA	H19	NA	NA	2	bleomycin	water	ECA1132	D	8	q75.EXT	-11.4121200898212
NA	H19	NA	NA	2	bleomycin	water	ECA1133	D	9	q75.EXT	-20.8543215944129
NA	H19	NA	NA	2	bleomycin	water	N2	E	1	q75.EXT	9.18301882136051
NA	H19	NA	NA	2	bleomycin	water	ECA1133	E	10	q75.EXT	-11.1043215944129
NA	H19	NA	NA	2	bleomycin	water	ECA1134	E	11	q75.EXT	-17.9461511887177
NA	H19	NA	NA	2	bleomycin	water	ECA1134	E	12	q75.EXT	-15.9461511887177
NA	H19	NA	NA	2	bleomycin	water	N2	E	2	q75.EXT	62.1830188213605
NA	H19	NA	NA	2	bleomycin	water	CB4856	E	3	q75.EXT	50.5676457825985
NA	H19	NA	NA	2	bleomycin	water	CB4856	E	4	q75.EXT	58.0676457825985
NA	H19	NA	NA	2	bleomycin	water	ECA1135	E	5	q75.EXT	-3.86349496161822
NA	H19	NA	NA	2	bleomycin	water	ECA1135	E	6	q75.EXT	-5.36349496161823
NA	H19	NA	NA	2	bleomycin	water	ECA1132	E	7	q75.EXT	-9.4121200898212
NA	H19	NA	NA	2	bleomycin	water	ECA1132	E	8	q75.EXT	-7.6621200898212
NA	H19	NA	NA	2	bleomycin	water	ECA1133	E	9	q75.EXT	-19.3543215944129
NA	H19	NA	NA	2	bleomycin	water	N2	F	1	q75.EXT	7.43301882136051
NA	H19	NA	NA	2	bleomycin	water	ECA1133	F	10	q75.EXT	-21.8543215944129
NA	H19	NA	NA	2	bleomycin	water	ECA1134	F	11	q75.EXT	-18.9461511887177
NA	H19	NA	NA	2	bleomycin	water	ECA1134	F	12	q75.EXT	-17.9461511887177
NA	H19	NA	NA	2	bleomycin	water	CB4856	F	3	q75.EXT	87.3176457825985
NA	H19	NA	NA	2	bleomycin	water	CB4856	F	4	q75.EXT	63.0676457825985
NA	H19	NA	NA	2	bleomycin	water	ECA1135	F	5	q75.EXT	25.3865050383818
NA	H19	NA	NA	2	bleomycin	water	ECA1135	F	6	q75.EXT	-1.61349496161822
NA	H19	NA	NA	2	bleomycin	water	ECA1132	F	7	q75.EXT	-14.4121200898212
NA	H19	NA	NA	2	bleomycin	water	ECA1132	F	8	q75.EXT	-11.4121200898212
NA	H19	NA	NA	2	bleomycin	water	ECA1133	F	9	q75.EXT	-23.8543215944129
NA	H19	NA	NA	2	bleomycin	water	N2	G	1	q75.EXT	3.18301882136051
NA	H19	NA	NA	2	bleomycin	water	ECA1133	G	10	q75.EXT	-21.8543215944129
NA	H19	NA	NA	2	bleomycin	water	ECA1134	G	11	q75.EXT	-17.9461511887177
NA	H19	NA	NA	2	bleomycin	water	ECA1134	G	12	q75.EXT	-19.9461511887177
NA	H19	NA	NA	2	bleomycin	water	N2	G	2	q75.EXT	61.1830188213605
NA	H19	NA	NA	2	bleomycin	water	CB4856	G	3	q75.EXT	49.0676457825985
NA	H19	NA	NA	2	bleomycin	water	ECA1135	G	5	q75.EXT	0.136505038381775
NA	H19	NA	NA	2	bleomycin	water	ECA1135	G	6	q75.EXT	-2.61349496161822
NA	H19	NA	NA	2	bleomycin	water	ECA1132	G	7	q75.EXT	-7.6621200898212
NA	H19	NA	NA	2	bleomycin	water	ECA1132	G	8	q75.EXT	-2.4121200898212
NA	H19	NA	NA	4	bleomycin	water	N2	A	1	q75.EXT	35.1830188213605
NA	H19	NA	NA	4	bleomycin	water	ECA1133	A	10	q75.EXT	-27.1043215944129
NA	H19	NA	NA	4	bleomycin	water	ECA1134	A	11	q75.EXT	-27.9461511887177
NA	H19	NA	NA	4	bleomycin	water	ECA1134	A	12	q75.EXT	-23.6961511887177
NA	H19	NA	NA	4	bleomycin	water	N2	A	2	q75.EXT	4.18301882136051
NA	H19	NA	NA	4	bleomycin	water	CB4856	A	3	q75.EXT	39.0676457825985
NA	H19	NA	NA	4	bleomycin	water	CB4856	A	4	q75.EXT	21.0676457825985
NA	H19	NA	NA	4	bleomycin	water	ECA1135	A	5	q75.EXT	-4.61349496161823
NA	H19	NA	NA	4	bleomycin	water	ECA1135	A	6	q75.EXT	-1.61349496161822
NA	H19	NA	NA	4	bleomycin	water	ECA1132	A	7	q75.EXT	-8.4121200898212
NA	H19	NA	NA	4	bleomycin	water	ECA1132	A	8	q75.EXT	1.3378799101788
NA	H19	NA	NA	4	bleomycin	water	ECA1133	A	9	q75.EXT	-22.8543215944129
NA	H19	NA	NA	4	bleomycin	water	ECA1133	B	10	q75.EXT	-23.8543215944129
NA	H19	NA	NA	4	bleomycin	water	ECA1134	B	11	q75.EXT	-27.9461511887177
NA	H19	NA	NA	4	bleomycin	water	ECA1134	B	12	q75.EXT	-23.1961511887177
NA	H19	NA	NA	4	bleomycin	water	N2	B	2	q75.EXT	14.1830188213605
NA	H19	NA	NA	4	bleomycin	water	CB4856	B	3	q75.EXT	-0.932354217401465
NA	H19	NA	NA	4	bleomycin	water	CB4856	B	4	q75.EXT	32.3176457825985
NA	H19	NA	NA	4	bleomycin	water	ECA1135	B	5	q75.EXT	-9.61349496161822
NA	H19	NA	NA	4	bleomycin	water	ECA1135	B	6	q75.EXT	-6.36349496161823
NA	H19	NA	NA	4	bleomycin	water	ECA1132	B	7	q75.EXT	-2.1621200898212
NA	H19	NA	NA	4	bleomycin	water	ECA1132	B	8	q75.EXT	-4.4121200898212
NA	H19	NA	NA	4	bleomycin	water	ECA1133	B	9	q75.EXT	-28.3543215944129
NA	H19	NA	NA	4	bleomycin	water	N2	C	1	q75.EXT	12.6830188213605
NA	H19	NA	NA	4	bleomycin	water	ECA1133	C	10	q75.EXT	-25.8543215944129
NA	H19	NA	NA	4	bleomycin	water	ECA1134	C	11	q75.EXT	-25.9461511887177
NA	H19	NA	NA	4	bleomycin	water	ECA1134	C	12	q75.EXT	-25.9461511887177
NA	H19	NA	NA	4	bleomycin	water	N2	C	2	q75.EXT	1.43301882136051
NA	H19	NA	NA	4	bleomycin	water	CB4856	C	3	q75.EXT	24.0676457825985
NA	H19	NA	NA	4	bleomycin	water	CB4856	C	4	q75.EXT	24.0676457825985
NA	H19	NA	NA	4	bleomycin	water	ECA1135	C	5	q75.EXT	-0.613494961618225
NA	H19	NA	NA	4	bleomycin	water	ECA1135	C	6	q75.EXT	-3.36349496161822
NA	H19	NA	NA	4	bleomycin	water	ECA1132	C	7	q75.EXT	-14.4121200898212
NA	H19	NA	NA	4	bleomycin	water	ECA1132	C	8	q75.EXT	-0.412120089821201
NA	H19	NA	NA	4	bleomycin	water	ECA1133	C	9	q75.EXT	-23.8543215944129
NA	H19	NA	NA	4	bleomycin	water	N2	D	1	q75.EXT	12.6830188213605
NA	H19	NA	NA	4	bleomycin	water	ECA1133	D	10	q75.EXT	-28.8543215944129
NA	H19	NA	NA	4	bleomycin	water	ECA1134	D	11	q75.EXT	-26.9461511887177
NA	H19	NA	NA	4	bleomycin	water	ECA1134	D	12	q75.EXT	-24.9461511887177
NA	H19	NA	NA	4	bleomycin	water	N2	D	2	q75.EXT	9.18301882136051
NA	H19	NA	NA	4	bleomycin	water	CB4856	D	3	q75.EXT	25.8176457825985
NA	H19	NA	NA	4	bleomycin	water	ECA1135	D	5	q75.EXT	4.63650503838177
NA	H19	NA	NA	4	bleomycin	water	ECA1135	D	6	q75.EXT	-7.86349496161823
NA	H19	NA	NA	4	bleomycin	water	ECA1132	D	7	q75.EXT	24.0878799101788
NA	H19	NA	NA	4	bleomycin	water	ECA1132	D	8	q75.EXT	-7.4121200898212
NA	H19	NA	NA	4	bleomycin	water	ECA1133	D	9	q75.EXT	-24.8543215944129
NA	H19	NA	NA	4	bleomycin	water	N2	E	1	q75.EXT	11.4330188213605
NA	H19	NA	NA	4	bleomycin	water	ECA1133	E	10	q75.EXT	-25.8543215944129
NA	H19	NA	NA	4	bleomycin	water	ECA1134	E	11	q75.EXT	-28.9461511887177
NA	H19	NA	NA	4	bleomycin	water	ECA1134	E	12	q75.EXT	-23.9461511887177
NA	H19	NA	NA	4	bleomycin	water	N2	E	2	q75.EXT	41.1830188213605
NA	H19	NA	NA	4	bleomycin	water	CB4856	E	3	q75.EXT	39.0676457825985
NA	H19	NA	NA	4	bleomycin	water	CB4856	E	4	q75.EXT	41.3176457825985
NA	H19	NA	NA	4	bleomycin	water	ECA1135	E	5	q75.EXT	-8.86349496161822
NA	H19	NA	NA	4	bleomycin	water	ECA1135	E	6	q75.EXT	-8.61349496161822
NA	H19	NA	NA	4	bleomycin	water	ECA1132	E	7	q75.EXT	-5.4121200898212
NA	H19	NA	NA	4	bleomycin	water	ECA1132	E	8	q75.EXT	-9.4121200898212
NA	H19	NA	NA	4	bleomycin	water	ECA1133	E	9	q75.EXT	-22.8543215944129
NA	H19	NA	NA	4	bleomycin	water	N2	F	1	q75.EXT	1.18301882136051
NA	H19	NA	NA	4	bleomycin	water	ECA1133	F	10	q75.EXT	-23.8543215944129
NA	H19	NA	NA	4	bleomycin	water	ECA1134	F	11	q75.EXT	-25.9461511887177
NA	H19	NA	NA	4	bleomycin	water	ECA1134	F	12	q75.EXT	-25.9461511887177
NA	H19	NA	NA	4	bleomycin	water	CB4856	F	3	q75.EXT	25.0676457825985
NA	H19	NA	NA	4	bleomycin	water	CB4856	F	4	q75.EXT	34.5676457825985
NA	H19	NA	NA	4	bleomycin	water	ECA1135	F	6	q75.EXT	1.88650503838178
NA	H19	NA	NA	4	bleomycin	water	ECA1132	F	7	q75.EXT	-13.4121200898212
NA	H19	NA	NA	4	bleomycin	water	ECA1132	F	8	q75.EXT	8.0878799101788
NA	H19	NA	NA	4	bleomycin	water	ECA1133	F	9	q75.EXT	-19.8543215944129
NA	H19	NA	NA	4	bleomycin	water	N2	G	1	q75.EXT	0.183018821360508
NA	H19	NA	NA	4	bleomycin	water	ECA1133	G	10	q75.EXT	-24.8543215944129
NA	H19	NA	NA	4	bleomycin	water	ECA1134	G	11	q75.EXT	-26.9461511887177
NA	H19	NA	NA	4	bleomycin	water	ECA1134	G	12	q75.EXT	-22.1961511887177
NA	H19	NA	NA	4	bleomycin	water	N2	G	2	q75.EXT	22.1830188213605
NA	H19	NA	NA	4	bleomycin	water	CB4856	G	3	q75.EXT	-2.18235421740146
NA	H19	NA	NA	4	bleomycin	water	CB4856	G	4	q75.EXT	29.0676457825985
NA	H19	NA	NA	4	bleomycin	water	ECA1135	G	5	q75.EXT	-1.86349496161822
NA	H19	NA	NA	4	bleomycin	water	ECA1135	G	6	q75.EXT	-5.11349496161823
NA	H19	NA	NA	4	bleomycin	water	ECA1132	G	7	q75.EXT	2.3378799101788
NA	H19	NA	NA	4	bleomycin	water	ECA1132	G	8	q75.EXT	-18.1621200898212
NA	H19	NA	NA	4	bleomycin	water	ECA1133	G	9	q75.EXT	-24.6043215944129
NA	H19	NA	NA	2	bleomycin	water	N2	A	1	q90.EXT	28.9013302764016
NA	H19	NA	NA	2	bleomycin	water	ECA1133	A	10	q90.EXT	-62.4774880225735
NA	H19	NA	NA	2	bleomycin	water	ECA1134	A	11	q90.EXT	-60.3497796909239
NA	H19	NA	NA	2	bleomycin	water	N2	A	2	q90.EXT	47.9013302763987
NA	H19	NA	NA	2	bleomycin	water	CB4856	A	3	q90.EXT	16.6079137524637
NA	H19	NA	NA	2	bleomycin	water	CB4856	A	4	q90.EXT	81.6079137524636
NA	H19	NA	NA	2	bleomycin	water	ECA1135	A	5	q90.EXT	51.0911152212267
NA	H19	NA	NA	2	bleomycin	water	ECA1135	A	6	q90.EXT	-25.9088847787733
NA	H19	NA	NA	2	bleomycin	water	ECA1132	A	7	q90.EXT	167.050066521545
NA	H19	NA	NA	2	bleomycin	water	ECA1132	A	8	q90.EXT	41.4500665215448
NA	H19	NA	NA	2	bleomycin	water	ECA1133	A	9	q90.EXT	-50.8774880225735
NA	H19	NA	NA	2	bleomycin	water	N2	B	1	q90.EXT	-14.1986697236013
NA	H19	NA	NA	2	bleomycin	water	ECA1133	B	10	q90.EXT	-46.4774880225735
NA	H19	NA	NA	2	bleomycin	water	ECA1134	B	11	q90.EXT	-62.3497796909239
NA	H19	NA	NA	2	bleomycin	water	N2	B	2	q90.EXT	255.401330276399
NA	H19	NA	NA	2	bleomycin	water	CB4856	B	3	q90.EXT	29.5079137524637
NA	H19	NA	NA	2	bleomycin	water	CB4856	B	4	q90.EXT	64.1079137524637
NA	H19	NA	NA	2	bleomycin	water	ECA1135	B	5	q90.EXT	56.0911152212267
NA	H19	NA	NA	2	bleomycin	water	ECA1135	B	6	q90.EXT	8.89111522122677
NA	H19	NA	NA	2	bleomycin	water	ECA1132	B	7	q90.EXT	57.9500665215448
NA	H19	NA	NA	2	bleomycin	water	ECA1132	B	8	q90.EXT	-30.0499334784552
NA	H19	NA	NA	2	bleomycin	water	ECA1133	B	9	q90.EXT	-32.8774880225735
NA	H19	NA	NA	2	bleomycin	water	N2	C	1	q90.EXT	37.6013302763987
NA	H19	NA	NA	2	bleomycin	water	ECA1133	C	10	q90.EXT	-65.4774880225735
NA	H19	NA	NA	2	bleomycin	water	ECA1134	C	11	q90.EXT	-58.6497796909239
NA	H19	NA	NA	2	bleomycin	water	ECA1134	C	12	q90.EXT	17.0502203090761
NA	H19	NA	NA	2	bleomycin	water	N2	C	2	q90.EXT	29.2013302763988
NA	H19	NA	NA	2	bleomycin	water	CB4856	C	3	q90.EXT	77.1079137524637
NA	H19	NA	NA	2	bleomycin	water	CB4856	C	4	q90.EXT	38.1079137524637
NA	H19	NA	NA	2	bleomycin	water	ECA1135	C	5	q90.EXT	-15.9088847787733
NA	H19	NA	NA	2	bleomycin	water	ECA1132	C	8	q90.EXT	67.3500665215449
NA	H19	NA	NA	2	bleomycin	water	ECA1133	C	9	q90.EXT	-63.7774880225735
NA	H19	NA	NA	2	bleomycin	water	N2	D	1	q90.EXT	62.9013302763987
NA	H19	NA	NA	2	bleomycin	water	ECA1133	D	10	q90.EXT	-59.0774880225735
NA	H19	NA	NA	2	bleomycin	water	ECA1134	D	11	q90.EXT	-46.3497796909239
NA	H19	NA	NA	2	bleomycin	water	ECA1134	D	12	q90.EXT	-58.3497796909239
NA	H19	NA	NA	2	bleomycin	water	N2	D	2	q90.EXT	58.4013302763987
NA	H19	NA	NA	2	bleomycin	water	CB4856	D	3	q90.EXT	67.1079137524637
NA	H19	NA	NA	2	bleomycin	water	CB4856	D	4	q90.EXT	26.6079137524637
NA	H19	NA	NA	2	bleomycin	water	ECA1135	D	5	q90.EXT	-11.3088847787733
NA	H19	NA	NA	2	bleomycin	water	ECA1135	D	6	q90.EXT	-22.9088847787733
NA	H19	NA	NA	2	bleomycin	water	ECA1132	D	7	q90.EXT	-24.9499334784552
NA	H19	NA	NA	2	bleomycin	water	ECA1132	D	8	q90.EXT	31.1500665215448
NA	H19	NA	NA	2	bleomycin	water	ECA1133	D	9	q90.EXT	-64.4774880225735
NA	H19	NA	NA	2	bleomycin	water	N2	E	1	q90.EXT	5.50133027639879
NA	H19	NA	NA	2	bleomycin	water	ECA1133	E	10	q90.EXT	-38.7774880225735
NA	H19	NA	NA	2	bleomycin	water	ECA1134	E	11	q90.EXT	-51.6497796909239
NA	H19	NA	NA	2	bleomycin	water	ECA1134	E	12	q90.EXT	-36.3497796909239
NA	H19	NA	NA	2	bleomycin	water	N2	E	2	q90.EXT	107.701330276399
NA	H19	NA	NA	2	bleomycin	water	CB4856	E	3	q90.EXT	32.1079137524637
NA	H19	NA	NA	2	bleomycin	water	CB4856	E	4	q90.EXT	40.7079137524637
NA	H19	NA	NA	2	bleomycin	water	ECA1135	E	5	q90.EXT	-14.8088847787733
NA	H19	NA	NA	2	bleomycin	water	ECA1135	E	6	q90.EXT	-22.2088847787733
NA	H19	NA	NA	2	bleomycin	water	ECA1132	E	7	q90.EXT	-26.0499334784552
NA	H19	NA	NA	2	bleomycin	water	ECA1132	E	8	q90.EXT	17.1500665215451
NA	H19	NA	NA	2	bleomycin	water	ECA1133	E	9	q90.EXT	-61.4774880225735
NA	H19	NA	NA	2	bleomycin	water	N2	F	1	q90.EXT	50.3013302763988
NA	H19	NA	NA	2	bleomycin	water	ECA1133	F	10	q90.EXT	-64.0774880225735
NA	H19	NA	NA	2	bleomycin	water	ECA1134	F	11	q90.EXT	-56.3497796909239
NA	H19	NA	NA	2	bleomycin	water	ECA1134	F	12	q90.EXT	-49.9497796909239
NA	H19	NA	NA	2	bleomycin	water	CB4856	F	4	q90.EXT	50.1079137524637
NA	H19	NA	NA	2	bleomycin	water	ECA1135	F	5	q90.EXT	163.291115221227
NA	H19	NA	NA	2	bleomycin	water	ECA1135	F	6	q90.EXT	44.6911152212269
NA	H19	NA	NA	2	bleomycin	water	ECA1132	F	7	q90.EXT	-24.8499334784552
NA	H19	NA	NA	2	bleomycin	water	ECA1132	F	8	q90.EXT	-13.0499334784552
NA	H19	NA	NA	2	bleomycin	water	ECA1133	F	9	q90.EXT	-62.0774880225735
NA	H19	NA	NA	2	bleomycin	water	N2	G	1	q90.EXT	-4.59866972360131
NA	H19	NA	NA	2	bleomycin	water	ECA1133	G	10	q90.EXT	-60.4774880225735
NA	H19	NA	NA	2	bleomycin	water	ECA1134	G	11	q90.EXT	-48.8497796909239
NA	H19	NA	NA	2	bleomycin	water	ECA1134	G	12	q90.EXT	-59.3497796909239
NA	H19	NA	NA	2	bleomycin	water	N2	G	2	q90.EXT	79.6013302763988
NA	H19	NA	NA	2	bleomycin	water	CB4856	G	3	q90.EXT	22.1079137524637
NA	H19	NA	NA	2	bleomycin	water	ECA1135	G	5	q90.EXT	-12.2088847787733
NA	H19	NA	NA	2	bleomycin	water	ECA1135	G	6	q90.EXT	-18.2088847787733
NA	H19	NA	NA	2	bleomycin	water	ECA1132	G	7	q90.EXT	64.8500665215448
NA	H19	NA	NA	2	bleomycin	water	ECA1132	G	8	q90.EXT	57.7500665215449
NA	H19	NA	NA	4	bleomycin	water	N2	A	1	q90.EXT	80.5013302763988
NA	H19	NA	NA	4	bleomycin	water	ECA1133	A	10	q90.EXT	-68.7774880225735
NA	H19	NA	NA	4	bleomycin	water	ECA1134	A	11	q90.EXT	-67.4497796909239
NA	H19	NA	NA	4	bleomycin	water	ECA1134	A	12	q90.EXT	-65.3497796909239
NA	H19	NA	NA	4	bleomycin	water	N2	A	2	q90.EXT	16.0013302763987
NA	H19	NA	NA	4	bleomycin	water	CB4856	A	3	q90.EXT	9.10791375246369
NA	H19	NA	NA	4	bleomycin	water	CB4856	A	4	q90.EXT	11.1079137524637
NA	H19	NA	NA	4	bleomycin	water	ECA1135	A	5	q90.EXT	-22.9088847787733
NA	H19	NA	NA	4	bleomycin	water	ECA1135	A	6	q90.EXT	113.091115221227
NA	H19	NA	NA	4	bleomycin	water	ECA1132	A	7	q90.EXT	94.3500665215448
NA	H19	NA	NA	4	bleomycin	water	ECA1132	A	8	q90.EXT	-0.149933478455154
NA	H19	NA	NA	4	bleomycin	water	ECA1133	A	9	q90.EXT	-65.2774880225735
NA	H19	NA	NA	4	bleomycin	water	ECA1133	B	10	q90.EXT	-46.3774880225736
NA	H19	NA	NA	4	bleomycin	water	ECA1134	B	11	q90.EXT	-65.3497796909239
NA	H19	NA	NA	4	bleomycin	water	ECA1134	B	12	q90.EXT	-60.6497796909239
NA	H19	NA	NA	4	bleomycin	water	N2	B	2	q90.EXT	147.401330276399
NA	H19	NA	NA	4	bleomycin	water	CB4856	B	3	q90.EXT	-18.6920862475363
NA	H19	NA	NA	4	bleomycin	water	CB4856	B	4	q90.EXT	10.9079137524638
NA	H19	NA	NA	4	bleomycin	water	ECA1135	B	5	q90.EXT	-28.1088847787733
NA	H19	NA	NA	4	bleomycin	water	ECA1135	B	6	q90.EXT	-25.8088847787733
NA	H19	NA	NA	4	bleomycin	water	ECA1132	B	7	q90.EXT	24.3500665215448
NA	H19	NA	NA	4	bleomycin	water	ECA1132	B	8	q90.EXT	50.9500665215448
[truncated: 48,447 more rows]
