# Supplementary material for: A nematode-specific gene underlies bleomycin-response variation in Caenorhabditis elegans
Source: bioRxiv preprint, doi:10.1101/565218, version 2 (2019-05-14)
Supplement: File S13 [file 565218_file16.csv]

marker	chr	pos	trait	lod	threshold	iteration	var_exp	eff_size	ci_l_marker	ci_l_pos	ci_r_marker	ci_r_pos
V_20486369	V	20486369	A_12_P100006	6.75085568004308	2.97546638156386	1	0.179381358982706	-0.42351891451953	V_20135235	20135235	V_20921615	20921615
II_4858788	II	4858788	A_12_P100024	3.37349026474629	3.0643214496331	1	0.0922574260408388	-0.30278241470887	II_4364919	4364919	II_5429933	5429933
III_3678175	III	3678175	A_12_P100026	3.74032925450998	3.16023257395798	1	0.10149705051215	-0.31758259442626	III_3380936	3380936	III_5224162	5224162
V_2235863	V	2235863	A_12_P100032	35.8425330102074	3.06953649727454	1	0.704130209331257	-0.835964112406162	V_2231050	2231050	V_2271884	2271884
X_3843271	X	3843271	A_12_P100040	4.08160320958099	3.02637582821018	1	0.109573247175907	0.329969310105504	X_3789476	3789476	X_4025890	4025890
II_8864770	II	8864770	A_12_P100042	32.9337253092595	3.07809320631153	1	0.613561442466318	-0.780834531427546	II_8707524	8707524	II_9145624	9145624
IV_12963367	IV	12963367	A_12_P100044	8.68923207803792	2.87805581923168	1	0.217842328010831	-0.465265784768418	IV_12868784	12868784	IV_13098759	13098759
V_1080319	V	1080319	A_12_P100047	11.8813434868816	3.10602020737148	1	0.28702581273857	-0.534049804485129	V_708390	708390	V_1422457	1422457
X_2995671	X	2995671	A_12_P100050	3.11542626769175	3.0374379801592	1	0.0852955256121433	-0.291134119892406	X_2518073	2518073	X_3907685	3907685
X_3796301	X	3796301	A_12_P100056	3.08136219384636	3.02919797308029	1	0.0835933715669989	-0.288214550451109	X_3136351	3136351	X_4322768	4322768
V_15426259	V	15426259	A_12_P100058	11.1011356033857	3.12233643115802	1	0.312316242374793	0.55677894062866	V_15339524	15339524	V_15660569	15660569
X_1594701	X	1594701	A_12_P100060	3.84219653718679	2.96533441927493	1	0.103499774109434	0.32069411009244	X_1461018	1461018	X_2155975	2155975
X_11897385	X	11897385	A_12_P100061	3.52584180621226	3.0986261512426	1	0.0975343328017764	0.31130228511804	X_10914595	10914595	X_12949257	12949257
X_3618239	X	3618239	A_12_P100063	4.08905481868308	3.14362344369156	1	0.108467736740207	-0.328307096659033	X_3088382	3088382	X_3991931	3991931
II_1418895	II	1418895	A_12_P100068	13.7430107669994	2.96104431811525	1	0.270060893459275	-0.51803706167995	II_1417887	1417887	II_1718365	1718365
II_5061727	II	5061727	A_12_P100073	3.1725252490215	3.04750373149747	1	0.086260262461089	0.292775929828803	II_4739944	4739944	II_7337528	7337528
X_5176675	X	5176675	A_12_P100076	4.33088989067711	3.03089848306054	1	0.121561876662929	-0.347477355566406	X_4483054	4483054	X_5569019	5569019
V_5030874	V	5030874	A_12_P100076	3.59761284421226	2.91123252535873	2	0.113467001308785	-0.335708701676056	V_4834721	4834721	V_5703972	5703972
X_12932361	X	12932361	A_12_P100078	9.69636842513723	3.03926094258836	1	0.241353879328447	-0.489730467095782	X_12893347	12893347	X_13024411	13024411
X_3843271	X	3843271	A_12_P100079	3.95428070820193	2.93941302716412	1	0.105538780480738	-0.323844120783078	X_3789476	3789476	X_4167697	4167697
I_1649397	I	1649397	A_12_P100079	3.65019813224347	2.99368083399362	2	0.0342425946617623	0.184464718662364	I_1370806	1370806	I_1688137	1688137
V_14789933	V	14789933	A_12_P100094	13.614390984737	2.94901591162993	1	0.306255471788581	0.55166052672444	V_14290503	14290503	V_15132428	15132428
X_3843271	X	3843271	A_12_P100094	5.17111580115491	2.99376266929515	2	0.0940129332207318	-0.305649565534073	X_3713398	3713398	X_3863779	3863779
II_1732850	II	1732850	A_12_P100109	44.456418401737	3.1133474444968	1	0.595500662281761	-0.769256378002548	II_1727040	1727040	II_1856961	1856961
II_1857611	II	1857611	A_12_P100109	3.47183567833731	2.91404665665458	2	0.569304398946208	-0.752146174712885	II_1417887	1417887	II_2203785	2203785
II_13446733	II	13446733	A_12_P100111	3.14399540670226	2.99038197297701	1	0.0841422069330635	-0.289159144180232	II_13374406	13374406	II_13663523	13663523
X_5176675	X	5176675	A_12_P100117	2.90079212922179	2.83831262294497	1	0.077520798998834	0.277548638627309	X_3453131	3453131	X_8217033	8217033
IV_16053550	IV	16053550	A_12_P100117	3.99821565945281	2.81217394930038	2	0.0669106276900502	-0.257856173345241	IV_15683717	15683717	IV_16382208	16382208
V_4310237	V	4310237	A_12_P100120	3.30649321493343	2.87533999517921	1	0.0882863459022516	-0.296194338003161	V_4074054	4074054	V_5045041	5045041
IV_15399516	IV	15399516	A_12_P100123	4.62989518005988	3.09775408518711	1	0.123702939025574	0.350606521787249	IV_15393010	15393010	IV_15480399	15480399
IV_1697436	IV	1697436	A_12_P100126	4.05707165597962	2.98096752402972	1	0.110860725380123	0.33190885512981	IV_1500428	1500428	IV_1782015	1782015
II_12258784	II	12258784	A_12_P100135	21.1436214952957	3.01759615917328	1	0.446624671478835	0.666194949906448	II_12254319	12254319	II_12370973	12370973
V_4385285	V	4385285	A_12_P100135	4.9865688878398	3.03807665072048	2	0.0796494288559813	0.281333412611897	V_4159795	4159795	V_4543432	4543432
IV_6475869	IV	6475869	A_12_P100138	10.4649439055837	2.88143952570367	1	0.254633794429062	-0.503013109307508	IV_5531856	5531856	IV_6766024	6766024
II_14212376	II	14212376	A_12_P100150	3.35023396303375	3.07087277175261	1	0.0857113865170137	0.29184297352002	II_13909294	13909294	II_14465917	14465917
III_10871365	III	10871365	A_12_P100150	2.88759723477703	2.85918595193006	2	0.0764990783251424	-0.275713532577507	III_8804664	8804664	III_11107793	11107793
V_17172126	V	17172126	A_12_P100151	3.3167219885322	3.05233972943827	1	0.097138749515993	-0.310579229120905	V_16851468	16851468	V_17330124	17330124
II_12254319	II	12254319	A_12_P100151	3.56655985418519	3.02467856939694	2	0.072093628422566	0.267562099660725	II_11918867	11918867	II_12561079	12561079
X_7628078	X	7628078	A_12_P100151	3.33264401082679	2.92690915671557	3	0.0863949311728362	0.292900615934798	X_6300921	6300921	X_8102133	8102133
III_1362120	III	1362120	A_12_P100152	4.3646349701938	2.93188504516975	1	0.118576764278413	-0.338569697663626	III_1188573	1188573	III_1460260	1460260
II_2914161	II	2914161	A_12_P100153	9.36572798864062	2.99119273515735	1	0.230539061485933	-0.480107965719705	II_2901910	2901910	II_3026490	3026490
V_5703972	V	5703972	A_12_P100153	4.63972741172496	3.01649568508524	2	0.0867776678845174	0.293616235219748	V_5505361	5505361	V_6850366	6850366
I_6651082	I	6651082	A_12_P100159	10.5242645164816	3.06550404848029	1	0.168946596507372	0.409736548646364	I_4775095	4775095	I_7273652	7273652
IV_13813174	IV	13813174	A_12_P100162	4.42226858877688	3.07194629631837	1	0.116753556401325	0.340615996841695	IV_13608743	13608743	IV_14237700	14237700
X_3843271	X	3843271	A_12_P100182	5.42140700295297	3.03487060510505	1	0.141722275855195	-0.375274487258224	X_3789476	3789476	X_4322768	4322768
IV_8778092	IV	8778092	A_12_P100182	3.37327125456811	3.00545481688504	2	0.0737869719546981	0.27078202109574	IV_7630216	7630216	IV_11565289	11565289
X_3843271	X	3843271	A_12_P100183	3.55415211410457	3.0088543174273	1	0.0954006913904581	0.307897202069279	X_3136351	3136351	X_4402562	4402562
IV_3533561	IV	3533561	A_12_P100197	3.33747854981414	2.87287937619056	1	0.0921066631569674	-0.302534916939022	IV_2378272	2378272	IV_3840091	3840091
V_5030874	V	5030874	A_12_P100227	3.52011661504122	3.01224397891633	1	0.0914110582096351	-0.301378204537228	V_4520286	4520286	V_5261629	5261629
II_13226999	II	13226999	A_12_P100231	3.06061163991802	3.0012261464987	1	0.0802364112496149	0.282368163453888	II_13174871	13174871	II_13573967	13573967
II_14204646	II	14204646	A_12_P100234	3.05110850157893	2.95922604917638	1	0.0789543222098911	0.280103113416609	II_14070545	14070545	II_14282734	14282734
IV_15573322	IV	15573322	A_12_P100235	3.04581119347806	3.01801596866332	1	0.0842794164690403	0.289377199860955	IV_15393010	15393010	IV_16053550	16053550
I_1169919	I	1169919	A_12_P100247	4.09293321929366	3.13701974179787	1	0.0491706902868845	0.221046241004996	I_1041272	1041272	I_1280348	1280348
III_1806339	III	1806339	A_12_P100260	3.32508072200635	3.06733772291875	1	0.0907638434759813	0.300321497221084	III_1461736	1461736	III_1954629	1954629
V_17050088	V	17050088	A_12_P100274	12.4296630869202	2.98972286065518	1	0.293608945396707	0.540150301541939	V_16994282	16994282	V_17218715	17218715
V_11513193	V	11513193	A_12_P100274	3.18155856665584	2.93122075909321	2	0.210239658026088	0.457074825412562	V_9005254	9005254	V_11833225	11833225
X_2326696	X	2326696	A_12_P100285	3.06362167958834	2.93601660296812	1	0.0832752549250046	-0.287636066091164	X_21056	21056	X_2659761	2659761
V_5269261	V	5269261	A_12_P100286	4.61323886590238	3.10898490754898	1	0.133134109034972	-0.363597443994704	V_5149493	5149493	V_5614890	5614890
X_4721441	X	4721441	A_12_P100287	2.96359400332791	2.96046131969419	1	0.0791281384864515	-0.280411264463661	X_3789476	3789476	X_5676445	5676445
I_14696180	I	14696180	A_12_P100287	2.97653285007408	2.95679630058074	2	0.0720218571465676	0.267523624174684	I_14536393	14536393	I_15058920	15058920
X_4758185	X	4758185	A_12_P100293	17.3006709950705	3.03169809206056	1	0.38101607391243	0.615320848341373	X_4674201	4674201	X_4958735	4958735
IV_7328515	IV	7328515	A_12_P100295	5.47800976649982	2.99708280144957	1	0.14248414170771	0.37628182925874	IV_6945644	6945644	IV_8696159	8696159
II_1990551	II	1990551	A_12_P100298	40.3736063366374	3.03856246792025	1	0.480879340473214	-0.691123695404255	II_1988126	1988126	II_2075279	2075279
II_1860460	II	1860460	A_12_P100298	8.27489875101335	2.88596765580435	2	0.477884118491364	-0.68896795464545	II_1727040	1727040	II_1903099	1903099
V_544989	V	544989	A_12_P100299	3.21256356181504	2.99607313699499	1	0.0872479786816529	0.295346113730533	V_8249	8249	V_1733937	1733937
II_1718365	II	1718365	A_12_P100302	5.71555000584174	2.8951047815156	1	0.132546849909961	0.362870267672282	II_1041078	1041078	II_1857345	1857345
X_16021441	X	16021441	A_12_P100307	3.35160614090488	3.10994007509342	1	0.09332469443091	-0.304516452142766	X_15507546	15507546	X_17709225	17709225
IV_15471143	IV	15471143	A_12_P100309	4.73457033653326	3.05145152220351	1	0.132755497971299	-0.363123259188096	IV_15393010	15393010	IV_16207052	16207052
III_3576233	III	3576233	A_12_P100312	3.39295746529924	3.10080148043368	1	0.09359339067719	0.304966806390425	III_3303713	3303713	III_5748303	5748303
III_9993581	III	9993581	A_12_P100322	3.33402486379011	2.98113619647829	1	0.0918702365856053	-0.302146382330663	III_9308961	9308961	III_10293762	10293762
V_18938530	V	18938530	A_12_P100334	8.64414739241991	3.01116410405917	1	0.213227393242384	0.460283120457409	V_18916789	18916789	V_19132445	19132445
III_10235415	III	10235415	A_12_P100334	3.83455632837474	3.08971839028686	2	0.0767729570086452	0.275972313990056	III_9927329	9927329	III_10684329	10684329
V_13155451	V	13155451	A_12_P100341	3.05004991679413	3.00944403991102	1	0.0827583858016303	0.286765755538769	V_10121039	10121039	V_14362950	14362950
IV_6763856	IV	6763856	A_12_P100350	2.90019780352668	2.84539939445037	1	0.085623561385754	-0.29156811300057	IV_4757132	4757132	IV_8696159	8696159
I_11868440	I	11868440	A_12_P100354	12.9702900004511	2.96353534561839	1	0.243486951401207	0.491889811773923	I_11833643	11833643	I_11926653	11926653
V_1422457	V	1422457	A_12_P100361	3.44755425240645	3.11144813525768	1	0.0936722895924258	0.305095322310287	V_691031	691031	V_1776406	1776406
X_4656473	X	4656473	A_12_P100385	3.56180751815209	2.94524213828341	1	0.0958188413272082	-0.308558795427957	X_3946591	3946591	X_5569019	5569019
X_4862702	X	4862702	A_12_P100388	4.36054443732467	3.08376891926596	1	0.13032412065365	0.35971271047539	X_4171941	4171941	X_5676445	5676445
IV_15429132	IV	15429132	A_12_P100392	3.18269698118069	2.96222758389164	1	0.0865242788393726	0.29322363647059	IV_15325632	15325632	IV_15636170	15636170
V_20445160	V	20445160	A_12_P100396	44.1920168328958	3.07214513769543	1	0.686966021941762	-0.826223626461541	V_20322261	20322261	V_20484393	20484393
IV_13117565	IV	13117565	A_12_P100396	3.76023448136823	3.09721315025975	2	0.0116332122168471	0.107517660689476	IV_12895248	12895248	IV_14376301	14376301
X_5526747	X	5526747	A_12_P100405	5.02953159870965	3.10351385957806	1	0.148715452195753	0.384256683696957	X_4674201	4674201	X_5676445	5676445
I_1683933	I	1683933	A_12_P100407	3.35567129192776	2.93625943532339	1	0.0285041933055955	0.168784255291445	I_1282314	1282314	I_1742352	1742352
V_13010814	V	13010814	A_12_P100417	3.01171647480687	3.00811289735544	1	0.0814680055614462	-0.28452702537365	V_12112105	12112105	V_14111468	14111468
II_14204646	II	14204646	A_12_P100420	4.04630060508791	2.94318799910226	1	0.103234422532535	0.320289165341018	II_14070545	14070545	II_14243104	14243104
V_12403730	V	12403730	A_12_P100422	6.60845219082655	2.95788132917412	1	0.170139127371787	0.412475651333456	V_12257725	12257725	V_12903236	12903236
IV_7016150	IV	7016150	A_12_P100424	3.44391190251483	3.18286352758	1	0.0957679519166348	-0.308430703568658	IV_4384113	4384113	IV_7641964	7641964
X_11847730	X	11847730	A_12_P100428	40.8605279746794	2.93556582892823	1	0.683874877601711	-0.824362649410186	X_11827052	11827052	X_11897385	11897385
II_643539	II	643539	A_12_P100440	9.71058175541339	3.08780014511371	1	0.21328614968475	0.460365330302981	II_6368	6368	II_693206	693206
IV_787345	IV	787345	A_12_P100443	6.20941270426383	2.97931318634599	1	0.158343642200696	-0.396670858820219	IV_122764	122764	IV_986168	986168
X_4721441	X	4721441	A_12_P100443	3.76985667506104	2.96739003812032	2	0.0845363174889811	-0.289835543949013	X_3946591	3946591	X_5638607	5638607
III_11107793	III	11107793	A_12_P100446	6.17048442691963	2.95457843685883	1	0.156608412924592	0.39449138691832	III_11063857	11063857	III_11297002	11297002
V_5019415	V	5019415	A_12_P100452	3.98092204361302	2.97756757086275	1	0.101660743846403	0.3178385881213	V_4445869	4445869	V_5261629	5261629
X_5526747	X	5526747	A_12_P100464	3.81110279536678	3.07591629566706	1	0.101494640270959	0.317578823601437	X_3713398	3713398	X_6076783	6076783
II_736515	II	736515	A_12_P100473	3.01646101971095	2.9645716393546	1	0.0715610861324943	-0.266644710627894	II_6368	6368	II_2256981	2256981
X_11328403	X	11328403	A_12_P100487	14.4155944858974	3.0807542975801	1	0.341687573660582	0.582639531084415	X_11270961	11270961	X_11600428	11600428
V_3427441	V	3427441	A_12_P100493	54.8879412564933	3.05015134476723	1	0.788101882942169	-0.887742556279061	V_3427228	3427228	V_3491728	3491728
IV_7641964	IV	7641964	A_12_P100498	6.95743828433299	3.05204400064877	1	0.177993184456456	0.420563586709743	IV_7124538	7124538	IV_8963101	8963101
IV_12621984	IV	12621984	A_12_P100500	3.49654991789836	3.02871376891293	1	0.095668736640816	-0.308329444706897	IV_11896553	11896553	IV_12963367	12963367
II_2611357	II	2611357	A_12_P100514	18.1804330863591	2.95899445609118	1	0.379435631230584	-0.614031057759851	II_2605505	2605505	II_2707200	2707200
X_5714088	X	5714088	A_12_P100514	3.80772765547473	3.01181748843574	2	0.0447934216064871	0.210973739925356	X_3946591	3946591	X_5949176	5949176
II_7337528	II	7337528	A_12_P100515	4.30099893531239	2.95777142331847	1	0.127061446950241	0.355208256327434	II_6419993	6419993	II_7433744	7433744
X_8465070	X	8465070	A_12_P100522	3.98754104000088	2.51945893141787	1	0.110019805995717	0.330634303876962	X_6996850	6996850	X_10235123	10235123
I_2190014	I	2190014	A_12_P100522	3.50547441741794	2.61889650586544	2	0.00574219970903969	0.0755355888876227	I_2128893	2128893	I_2260201	2260201
I_2190014	I	2190014	A_12_P100522	3.02126828980582	2.58634450665968	3	0.00574219970903969	0.0755355888876227	I_2128893	2128893	I_2260201	2260201
I_2190014	I	2190014	A_12_P100522	2.60141388506845	2.57962409352876	4	0.00574219970903969	0.0755355888876227	I_2128893	2128893	I_2260201	2260201
X_3843271	X	3843271	A_12_P100523	3.14073950525814	3.09230230873366	1	0.0848018837827018	0.290290438357309	X_3184463	3184463	X_4501238	4501238
II_7433744	II	7433744	A_12_P100529	24.4433238649715	3.07945724698241	1	0.504923616929774	0.708341723109341	II_7367480	7367480	II_7692763	7692763
III_12501901	III	12501901	A_12_P100529	3.56137966816091	2.94612837562644	2	0.0903070401606892	-0.29956480326408	III_12221630	12221630	III_13025273	13025273
V_2819653	V	2819653	A_12_P100536	18.7840868804375	2.82511852081616	1	0.417961401652993	-0.646489817135531	V_2759587	2759587	V_2935566	2935566
IV_4755912	IV	4755912	A_12_P100536	4.36082259119776	2.77860431975973	2	0.0834913746510203	0.288038663491195	IV_4331347	4331347	IV_5208413	5208413
X_3796301	X	3796301	A_12_P100536	3.30485478895743	2.71371145695735	3	0.0412869546395112	-0.202551939655316	X_2597696	2597696	X_3863779	3863779
III_3326662	III	3326662	A_12_P100542	3.53421679383728	2.90666497034528	1	0.0959085551477028	-0.308715656693428	III_3065184	3065184	III_3630998	3630998
V_3685467	V	3685467	A_12_P100545	7.08329494363874	3.05398884386788	1	0.195546173577631	-0.440719619657369	V_3671227	3671227	V_3897200	3897200
V_11833225	V	11833225	A_12_P100545	3.78669993275699	3.04901386144111	2	0.0950189231674846	0.307215253973079	V_11558601	11558601	V_12279420	12279420
I_2545614	I	2545614	A_12_P100551	6.31968293114177	2.66492450999236	1	0.0123855445347862	0.110939839680243	I_2536606	2536606	I_2693910	2693910
I_2545614	I	2545614	A_12_P100551	5.48610899500355	2.60586588275049	2	0.0123855445347862	0.110939839680243	I_2536606	2536606	I_2693910	2693910
I_2545614	I	2545614	A_12_P100551	4.75502988856315	2.54090223367625	3	0.0123855445347862	0.110939839680243	I_2536606	2536606	I_2693910	2693910
I_2545614	I	2545614	A_12_P100551	4.11564439297787	2.68022061623909	4	0.0123855445347862	0.110939839680243	I_2536606	2536606	I_2693910	2693910
I_2545614	I	2545614	A_12_P100551	3.55785417215553	2.54909007964719	5	0.0123855445347862	0.110939839680243	I_2536606	2536606	I_2693910	2693910
I_2545614	I	2545614	A_12_P100551	3.07232984716423	2.72201415980942	6	0.0123855445347862	0.110939839680243	I_2536606	2536606	I_2693910	2693910
I_1759606	I	1759606	A_12_P100551	2.9507112180179	2.74147525699828	7	0.0134161646031293	0.115463354400428	I_1683933	1683933	I_1868286	1868286
II_3331906	II	3331906	A_12_P100557	4.9014224574513	3.11709260217763	1	0.139267987285171	0.371841443789003	II_3223762	3223762	II_3542182	3542182
II_13566710	II	13566710	A_12_P100557	3.02032939292025	2.99789060439571	2	0.0980596923083181	0.312016388826017	II_13163270	13163270	II_13672258	13672258
IV_2116532	IV	2116532	A_12_P100561	44.104822509635	3.07116928261227	1	0.734582889078687	-0.854272610894925	IV_2088318	2088318	IV_2135122	2135122
I_8346637	I	8346637	A_12_P100562	13.9131066755602	2.92222184903768	1	0.265957921724229	-0.514033969920776	I_7969987	7969987	I_8955681	8955681
V_17973702	V	17973702	A_12_P100564	4.72981694634542	3.03882400905883	1	0.121818801682241	0.34792620725783	V_17936259	17936259	V_18174312	18174312
IV_11565289	IV	11565289	A_12_P100564	4.60781943114171	3.01396590594615	2	0.0945020134643291	-0.307409325711186	IV_9694906	9694906	IV_12621984	12621984
X_5361887	X	5361887	A_12_P100566	7.5297185340646	2.99251325574691	1	0.188495165203435	0.432792861562856	X_4753798	4753798	X_5676445	5676445
IV_3777826	IV	3777826	A_12_P100569	5.73797142868357	2.96006594866308	1	0.154145957678593	0.391361899387389	IV_3584623	3584623	IV_3857221	3857221
III_1452343	III	1452343	A_12_P100574	16.6721255704953	2.97254108768582	1	0.396291161247306	-0.627442413736025	III_1395216	1395216	III_1460260	1460260
IV_6062184	IV	6062184	A_12_P100577	29.2886756582423	3.00124687727163	1	0.547223656602731	0.737415756805551	IV_5838650	5838650	IV_6109938	6109938
IV_15573322	IV	15573322	A_12_P100596	3.42038665353995	3.03733170058413	1	0.0923433278426492	-0.302923343761817	IV_15467845	15467845	IV_15758388	15758388
II_13542748	II	13542748	A_12_P100617	9.56588684720789	3.03416060886238	1	0.236008439462197	-0.484276893578724	II_13533998	13533998	II_13578819	13578819
IV_4761504	IV	4761504	A_12_P100621	57.3636020980854	3.06338815494898	1	0.786773894950092	0.884209042851202	IV_4757132	4757132	IV_4844241	4844241
IV_1562568	IV	1562568	A_12_P100625	12.5249975686413	2.99626274024402	1	0.303275752572444	-0.548970270508501	IV_1497020	1497020	IV_1575852	1575852
X_4536045	X	4536045	A_12_P100627	8.39933265137888	2.99834939350628	1	0.229018038706936	0.476893736235191	X_3946591	3946591	X_4566632	4566632
II_7399295	II	7399295	A_12_P100628	7.727558550958	3.03208572135897	1	0.199197102079228	0.444909305495475	II_6419993	6419993	II_8864770	8864770
I_12719079	I	12719079	A_12_P100630	39.1623611178439	3.07542225399502	1	0.447484151454701	-0.666384455026985	I_12690450	12690450	I_12732062	12732062
I_12732062	I	12732062	A_12_P100630	11.2452099082437	3.0290224847756	2	0.450111345909895	-0.668337774959115	I_12597637	12597637	I_12775585	12775585
III_969094	III	969094	A_12_P100643	3.04522441740107	3.00003539874728	1	0.0856935944645291	0.291788849281048	III_4664	4664	III_1117880	1117880
III_8659106	III	8659106	A_12_P100652	4.13781150491332	3.17074443063218	1	0.112580054699673	-0.334472725406997	III_6268573	6268573	III_9210994	9210994
V_1038256	V	1038256	A_12_P100655	11.7375749125647	3.00105036548822	1	0.281075780021914	-0.528495986569925	V_1005065	1005065	V_1113279	1113279
V_15572136	V	15572136	A_12_P100658	54.2708636426798	3.18736974265636	1	0.762223390338076	-0.870304275835301	V_15540993	15540993	V_15619566	15619566
III_2742096	III	2742096	A_12_P100663	3.59333231863616	2.9709197311587	1	0.0971179928916016	-0.310656060466977	III_2622669	2622669	III_2821841	2821841
II_13106619	II	13106619	A_12_P100664	3.5654657945969	3.01764598008945	1	0.0922116233185752	0.302707244713611	II_12729664	12729664	II_13190752	13190752
X_16021441	X	16021441	A_12_P100674	4.67006827027576	2.97249471615389	1	0.128251837596024	-0.356972982775933	X_15803787	15803787	X_17709225	17709225
I_2260201	I	2260201	A_12_P100674	5.3756688628721	2.81332640427614	2	0.00272324225931402	0.052017166187371	I_2250505	2250505	I_2284272	2284272
I_2260201	I	2260201	A_12_P100674	5.12468758623327	2.936390349523	3	0.00272324225931402	0.052017166187371	I_2250505	2250505	I_2284272	2284272
I_2260201	I	2260201	A_12_P100674	4.88459774185106	2.88985756316228	4	0.00272324225931402	0.052017166187371	I_2250505	2250505	I_2284272	2284272
I_2260201	I	2260201	A_12_P100674	4.65499917074369	2.84835481774839	5	0.00272324225931402	0.052017166187371	I_2250505	2250505	I_2284272	2284272
I_2260201	I	2260201	A_12_P100674	4.43550015707583	3.01948425016595	6	0.00272324225931402	0.052017166187371	I_2250505	2250505	I_2284272	2284272
I_2260201	I	2260201	A_12_P100674	4.22571781373092	2.93917179045874	7	0.00272324225931402	0.052017166187371	I_2250505	2250505	I_2284272	2284272
I_2260201	I	2260201	A_12_P100674	4.02527840668962	2.78106390538493	8	0.00272324225931402	0.052017166187371	I_2250505	2250505	I_2284272	2284272
I_2260201	I	2260201	A_12_P100674	3.8338176215909	2.9500434986122	9	0.00272324225931402	0.052017166187371	I_2250505	2250505	I_2284272	2284272
I_2260201	I	2260201	A_12_P100674	3.6509807759679	2.9450419774056	10	0.00272324225931402	0.052017166187371	I_2250505	2250505	I_2284272	2284272
I_2260201	I	2260201	A_12_P100674	3.47642298071745	3.01981446121664	11	0.00272324225931402	0.052017166187371	I_2250505	2250505	I_2284272	2284272
X_5638607	X	5638607	A_12_P100674	3.41800525317532	3.03711352823943	12	0.0956702218697923	-0.30831307337961	X_4536045	4536045	X_5810100	5810100
I_2260201	I	2260201	A_12_P100674	3.18905320897422	2.97466821654603	13	0.00272324225931402	0.052017166187371	I_2250505	2250505	I_2284272	2284272
I_2260201	I	2260201	A_12_P100674	3.0356029841514	2.98567099690514	14	0.00272324225931402	0.052017166187371	I_2250505	2250505	I_2284272	2284272
V_16307111	V	16307111	A_12_P100681	14.2119553497852	3.06528686644118	1	0.360834836236294	0.598482780797432	V_16188475	16188475	V_16436223	16436223
X_1509755	X	1509755	A_12_P100681	3.70444077780518	3.14542746978444	2	0.0833318167841913	-0.287609253740642	X_1366945	1366945	X_2271968	2271968
X_5341098	X	5341098	A_12_P100682	7.70193539227437	2.97102277185016	1	0.192343717821481	0.437188756607903	X_4630882	4630882	X_5676445	5676445
II_4678773	II	4678773	A_12_P100688	4.25826370736038	3.11839192239632	1	0.114704792630276	0.337614245611983	II_4119401	4119401	II_5061727	5061727
V_11619117	V	11619117	A_12_P100693	3.25206326411129	3.15972318124507	1	0.0850230148926794	0.290668675556824	V_9538466	9538466	V_11671299	11671299
X_5526747	X	5526747	A_12_P100704	4.7387899396669	2.92370166988259	1	0.124550582679737	0.351805693077515	X_4630882	4630882	X_5810100	5810100
II_12607036	II	12607036	A_12_P100714	54.7007568180987	3.12904056371837	1	0.775260126226649	-0.877715373213986	II_12603370	12603370	II_12610701	12610701
X_4455978	X	4455978	A_12_P100714	3.47999000148316	3.0792054645192	2	0.0383583076302476	-0.195235909638691	X_2949804	2949804	X_5810100	5810100
V_4310237	V	4310237	A_12_P100716	3.65732965901975	3.06863182875007	1	0.0971673987385269	0.310735068866052	V_4079351	4079351	V_4889127	4889127
X_4501238	X	4501238	A_12_P100722	6.54087209853003	3.07755249144211	1	0.165148042878584	0.405104154437153	X_3946591	3946591	X_4656473	4656473
II_3038907	II	3038907	A_12_P100722	3.27694742413206	3.0241907852132	2	0.0952421115223503	0.307641194464662	II_2826436	2826436	II_3331906	3331906
X_5361887	X	5361887	A_12_P100729	3.04335432869991	2.85423961888847	1	0.0850929138406221	0.290745751540825	X_4753798	4753798	X_5676445	5676445
X_6953360	X	6953360	A_12_P100753	4.73148517410318	3.00929690005932	1	0.127816076497343	0.35638771275451	X_6300921	6300921	X_7838301	7838301
X_3843271	X	3843271	A_12_P100759	3.12002502951027	3.07815160281874	1	0.0842674732511288	-0.289374306293132	X_3713398	3713398	X_4505845	4505845
II_733570	II	733570	A_12_P100764	3.89966827020752	2.9407728772531	1	0.0910825834487936	-0.300848362156102	II_6368	6368	II_1324489	1324489
IV_6109938	IV	6109938	A_12_P100765	13.3086535824459	2.97879818005764	1	0.309223694342723	-0.554327422408137	IV_5646749	5646749	IV_6488811	6488811
V_5856208	V	5856208	A_12_P100768	3.17946789798314	3.07850257263741	1	0.0809283273939114	0.283583046395152	V_5602686	5602686	V_7666834	7666834
X_3034408	X	3034408	A_12_P100774	3.52763432634956	3.07603545908604	1	0.0957388961430545	-0.30844248202991	X_2618371	2618371	X_3907685	3907685
IV_16529740	IV	16529740	A_12_P100777	73.0221422522319	3.23217485786351	1	0.826456704725235	-0.906233338503397	IV_16527967	16527967	IV_17490756	17490756
IV_12062878	IV	12062878	A_12_P100783	3.07492285284134	2.83154062214869	1	0.0827522465396511	-0.286760862320678	IV_9987122	9987122	IV_12896142	12896142
I_13237585	I	13237585	A_12_P100796	3.08002756293563	3.06776969155707	1	0.0782329771637603	-0.278557735601131	I_12959042	12959042	I_13375137	13375137
II_7399295	II	7399295	A_12_P100798	4.12801161162711	2.97476572811775	1	0.111936785195793	0.333515787118773	II_6575108	6575108	II_8102088	8102088
X_7002637	X	7002637	A_12_P100798	4.00239072471245	3.02932461254358	2	0.0755467959050107	0.273992078031185	X_4284268	4284268	X_7802067	7802067
V_18117245	V	18117245	A_12_P100808	50.7782592943345	3.03673435102289	1	0.751195279177636	-0.863985405297136	V_18112934	18112934	V_18145937	18145937
X_4862702	X	4862702	A_12_P100809	64.1336851633175	2.9712357013958	1	0.807588175814064	-0.895828669387732	X_4785093	4785093	X_4893004	4893004
IV_6062184	IV	6062184	A_12_P100816	4.57166818012622	3.02543651393267	1	0.118676675786376	0.343409786696653	IV_4785460	4785460	IV_7396833	7396833
II_11654614	II	11654614	A_12_P100817	9.00213473817449	3.01608762997784	1	0.230259160726079	0.478312806085112	II_11434074	11434074	II_12073118	12073118
V_7738803	V	7738803	A_12_P100818	17.5893485059714	2.97974896462304	1	0.369977168806475	0.606341709247953	V_7626098	7626098	V_7970924	7970924
V_16859250	V	16859250	A_12_P100824	44.300991001726	3.10132166860822	1	0.706982819286027	-0.837938226367986	V_16858940	16858940	V_16994282	16994282
V_3685467	V	3685467	A_12_P100825	67.3908778336181	3.10021920510352	1	0.857530389893634	0.923094243489072	V_3682670	3682670	V_3778723	3778723
X_3843271	X	3843271	A_12_P100826	3.14342783101496	3.11765367284992	1	0.0848712161071869	-0.29040908194099	X_3594656	3594656	X_4862702	4862702
IV_15143459	IV	15143459	A_12_P100828	6.54610829378018	3.10936533356733	1	0.175668651758241	-0.417710068598452	IV_15084637	15084637	IV_15380612	15380612
I_10676576	I	10676576	A_12_P100828	4.00176152963428	2.99395478270375	2	0.1040078864444	-0.321411154838956	I_10147200	10147200	I_11814261	11814261
V_4385285	V	4385285	A_12_P100828	3.31019221959573	3.02940969161503	3	0.0666304476919566	0.257255207846815	V_3955395	3955395	V_4617905	4617905
X_5341098	X	5341098	A_12_P100840	4.31763564713197	3.04374017114112	1	0.113081582841104	0.335216911741598	X_4165450	4165450	X_5922452	5922452
X_3843271	X	3843271	A_12_P100841	3.01940951758643	2.98438904249232	1	0.0816671386689968	-0.284874549347686	X_3713398	3713398	X_4566632	4566632
V_1038256	V	1038256	A_12_P100846	3.16191398779711	3.12322007642862	1	0.0908840829051653	0.300456523672246	V_8249	8249	V_1776406	1776406
I_1041272	I	1041272	A_12_P100847	3.5661974032007	2.93698327133638	1	0.0485680369034764	0.219687454243255	I_854751	854751	I_1253971	1253971
IV_4576321	IV	4576321	A_12_P100848	3.86290860065178	2.95042240252411	1	0.101291263277598	-0.317260478640657	IV_4281922	4281922	IV_5163110	5163110
II_13672258	II	13672258	A_12_P100848	3.5707013356313	3.08456588743482	2	0.0620428267233383	0.248299456837825	II_13374408	13374408	II_13777801	13777801
X_5526747	X	5526747	A_12_P100851	3.42541458214125	3.10115020665819	1	0.0917252575450569	0.301907881866015	X_4171941	4171941	X_5810100	5810100
V_17857892	V	17857892	A_12_P100853	2.93368065243452	2.91452522133955	1	0.0783629063798416	0.279052070252209	V_17814440	17814440	V_17990625	17990625
V_16598569	V	16598569	A_12_P100858	43.2200413568615	3.12506175538251	1	0.682824297634414	0.823695998707304	V_16597288	16597288	V_16625100	16625100
V_13010814	V	13010814	A_12_P100862	5.75616658503835	3.01100548016563	1	0.14976517172435	0.385776168788754	V_12805611	12805611	V_13228106	13228106
V_9529886	V	9529886	A_12_P100867	3.07836113216709	2.9986665682177	1	0.0845930056313712	0.289890449479775	V_4563217	4563217	V_10142996	10142996
II_1223891	II	1223891	A_12_P100880	10.8901577266183	3.00936112622659	1	0.219570030988743	-0.467107147662738	II_1041078	1041078	II_1618934	1618934
V_12931140	V	12931140	A_12_P100883	5.14728191429873	3.12372866297236	1	0.137128955930865	0.369128057847871	V_12486434	12486434	V_13158595	13158595
V_2285994	V	2285994	A_12_P100887	20.0811380918591	3.2307180129915	1	0.438058035862206	-0.659774926680039	V_2273283	2273283	V_2486879	2486879
II_10595652	II	10595652	A_12_P100887	3.62699379000233	2.88580618274459	2	0.0556757225730122	-0.235213861827536	II_9360560	9360560	II_12247176	12247176
X_2597696	X	2597696	A_12_P100890	3.24839702992329	3.02046808515042	1	0.0913913933749372	0.301320533662201	X_2260211	2260211	X_3136351	3136351
II_10096849	II	10096849	A_12_P100908	3.29186255078947	3.00364625097905	1	0.089899641879677	0.298888332537379	II_9835892	9835892	II_10646733	10646733
IV_16167824	IV	16167824	A_12_P100910	4.54039911082982	2.96717889393396	1	0.11335489624055	-0.335621769801697	IV_15954820	15954820	IV_16379127	16379127
IV_15573322	IV	15573322	A_12_P100936	11.8584918777185	3.09864862990024	1	0.284606572858911	-0.531805034212029	IV_15467845	15467845	IV_15712992	15712992
IV_3370426	IV	3370426	A_12_P100936	3.60648003486316	2.93520246227315	2	0.0512500639920323	0.225435779651461	IV_2964937	2964937	IV_3690212	3690212
X_5361887	X	5361887	A_12_P100936	4.15897818578146	2.99247365078271	3	0.140174613716107	-0.373219790970388	X_4639456	4639456	X_6180571	6180571
V_17733401	V	17733401	A_12_P100938	4.14989299955256	3.1337283943101	1	0.107119502787637	0.326260318186161	V_17538727	17538727	V_17814400	17814400
I_13139175	I	13139175	A_12_P100940	3.28497795430317	3.07231802215007	1	0.0841200818021107	-0.289121124589433	I_12804007	12804007	I_13254938	13254938
II_3331906	II	3331906	A_12_P100940	3.42062713843631	3.14928991362894	2	0.0662167228221575	-0.256515624175054	II_2949922	2949922	II_5196296	5196296
X_4758185	X	4758185	A_12_P100944	3.24011524997788	2.87839324526899	1	0.0885652044659838	-0.296637516255234	X_3814926	3814926	X_5676445	5676445
II_4858788	II	4858788	A_12_P100953	3.25322231811957	2.93994807076398	1	0.0891209734314004	-0.297591102293964	II_4119401	4119401	II_5360003	5360003
X_5526747	X	5526747	A_12_P100963	6.52394319701855	3.15615063520165	1	0.168476628315544	0.409158063028697	X_4483054	4483054	X_6076783	6076783
V_19727537	V	19727537	A_12_P100964	21.7334990741635	3.04211575012566	1	0.459431783779319	0.675651882765958	V_19703185	19703185	V_19785151	19785151
II_14204646	II	14204646	A_12_P100985	3.94843949169052	3.15027517200494	1	0.10087777177081	0.316612255568266	II_14136063	14136063	II_14391450	14391450
X_5576572	X	5576572	A_12_P101000	6.95726169268196	2.91030563319691	1	0.177238341374787	0.419670864875393	X_4674201	4674201	X_5676445	5676445
X_2241158	X	2241158	A_12_P101006	4.6969542459835	2.94141951636946	1	0.122694877344977	0.349168050497699	X_1142327	1142327	X_2536346	2536346
IV_1503573	IV	1503573	A_12_P101006	3.16251920973087	3.02561508732581	2	0.104312780071425	0.321951195995011	IV_1418793	1418793	IV_1713430	1713430
I_13853980	I	13853980	A_12_P101008	10.3641858113925	3.13691568061599	1	0.25733818324206	-0.505677229627074	I_13788926	13788926	I_13979708	13979708
II_4636342	II	4636342	A_12_P101012	3.83656920718232	3.02554213005084	1	0.117013237075604	0.340848101416672	II_4209585	4209585	II_4905764	4905764
II_2522027	II	2522027	A_12_P101012	2.98126093220496	2.90764957502139	2	0.038023158991677	-0.194297619642854	II_2073610	2073610	II_2589650	2589650
X_5576572	X	5576572	A_12_P101017	4.31500238502866	3.02108196378014	1	0.114094957123045	0.336715575488214	X_4630882	4630882	X_5810100	5810100
IV_15399516	IV	15399516	A_12_P101022	8.19828167869417	3.00956738590603	1	0.208345180188859	-0.455010805524051	IV_15114347	15114347	IV_15410121	15410121
V_9905233	V	9905233	A_12_P101037	5.54942914962203	3.09546124847399	1	0.142833969685931	-0.376743470855914	V_7667064	7667064	V_13332418	13332418
I_13394201	I	13394201	A_12_P101038	3.63016164419062	3.15378664979634	1	0.0955255318668194	0.306579591236676	I_13226874	13226874	I_13709331	13709331
X_5361887	X	5361887	A_12_P101041	9.51895892330337	2.99903716352885	1	0.231800443165066	0.479940182463027	X_4785093	4785093	X_5676445	5676445
V_4310237	V	4310237	A_12_P101042	3.18179778312747	3.10764285490638	1	0.0851080126553373	-0.290813930435756	V_3898000	3898000	V_5019415	5019415
V_11513193	V	11513193	A_12_P101050	14.9459239841448	3.09131847439459	1	0.336228837286301	0.578026115768929	V_11050301	11050301	V_11600826	11600826
V_2064625	V	2064625	A_12_P101052	11.144551416336	3.1045142263607	1	0.275334600732896	0.523070680288375	V_1973596	1973596	V_2272126	2272126
IV_15712992	IV	15712992	A_12_P101054	5.53652900102297	3.02078414991312	1	0.14604416329408	-0.380953601562976	IV_15625988	15625988	IV_15983752	15983752
II_14465917	II	14465917	A_12_P101068	3.50075669514899	2.94987342370501	1	0.0944050478979477	0.306286312881163	II_13909294	13909294	II_15274701	15274701
X_9642366	X	9642366	A_12_P101069	4.26483398841849	3.04434832734063	1	0.114540136082891	0.337371839175313	X_8382557	8382557	X_10545442	10545442
III_7349335	III	7349335	A_12_P101071	25.5224876467143	3.04421099430838	1	0.543632372488448	-0.73483592255399	III_7137768	7137768	III_8304308	8304308
X_5526747	X	5526747	A_12_P101084	6.36996478330966	3.13641222675813	1	0.163618090607687	-0.403223320273853	X_4639456	4639456	X_5810100	5810100
IV_15961314	IV	15961314	A_12_P101085	16.860221368712	3.20731562634678	1	0.373496273323402	-0.60921854876378	IV_15683717	15683717	IV_15983752	15983752
V_19900018	V	19900018	A_12_P101096	3.20378395120548	2.89801704033535	1	0.0838184546722043	-0.288602312152772	V_19699814	19699814	V_20038134	20038134
X_3843271	X	3843271	A_12_P101100	4.02994053915479	3.03089844420228	1	0.10744260606321	-0.326751995253947	X_3789476	3789476	X_4505845	4505845
IV_13206263	IV	13206263	A_12_P101100	3.73630885440486	3.21134426054593	2	0.0901581354019888	0.299317729351041	IV_12697226	12697226	IV_13392021	13392021
V_16859250	V	16859250	A_12_P101111	5.38830316997414	3.01662981926557	1	0.14389914383192	-0.378106775669304	V_16620392	16620392	V_16999614	16999614
X_5291269	X	5291269	A_12_P101112	3.99347693210732	3.0674023916737	1	0.104520894749493	-0.322278653701376	X_4284268	4284268	X_5569019	5569019
X_6953360	X	6953360	A_12_P101116	6.56366659840325	3.01873228743843	1	0.18794332012834	0.43202680391368	X_6300921	6300921	X_7726527	7726527
I_12959964	I	12959964	A_12_P101125	3.11359000486488	3.06589885343031	1	0.078698381884614	-0.279648750234971	I_12780398	12780398	I_13205179	13205179
III_11847455	III	11847455	A_12_P101126	37.282827871536	3.02928394207277	1	0.650918996979886	-0.80425441671787	III_11843946	11843946	III_11859506	11859506
IV_4761504	IV	4761504	A_12_P101126	3.10721890074938	3.05803671709846	2	0.0216320261083568	-0.146615059355061	IV_4727677	4727677	IV_6488811	6488811
I_12098639	I	12098639	A_12_P101132	9.95576374703446	3.14552797768402	1	0.191753559964323	-0.436517540004801	I_12048245	12048245	I_12147931	12147931
II_9651692	II	9651692	A_12_P101140	4.86858774656767	3.08936337718842	1	0.130640646201525	-0.360304047877953	II_9115410	9115410	II_9845678	9845678
X_4179483	X	4179483	A_12_P101142	3.75705439801253	3.11958452115246	1	0.102819485256394	0.319631950963005	X_2949804	2949804	X_5576572	5576572
III_5617374	III	5617374	A_12_P101142	3.49057875701065	3.02511452900023	2	0.0848627859933499	0.290382951796467	III_4189252	4189252	III_9125163	9125163
I_2693910	I	2693910	A_12_P101144	3.5886374743379	2.97406608355508	1	0.00502621338974684	0.0706696490137242	I_2489837	2489837	I_2874023	2874023
I_2545614	I	2545614	A_12_P101144	3.28456121789627	2.95039467166372	2	0.00741638177817847	0.085843716588231	I_2489837	2489837	I_3303792	3303792
I_2820998	I	2820998	A_12_P101144	3.02518509798622	3.00028229999078	3	0.00967078076867307	0.098026442549632	I_2489837	2489837	I_3338042	3338042
I_12957859	I	12957859	A_12_P101149	37.0795307545301	3.18577529267847	1	0.580217707855615	-0.761403012094433	I_12955937	12955937	I_12958276	12958276
I_12804661	I	12804661	A_12_P101149	3.46623094234513	2.9867541965851	2	0.522864024884196	-0.720646348669855	I_12690450	12690450	I_12839318	12839318
V_13768624	V	13768624	A_12_P101149	2.9406418687236	2.9061078582327	3	0.00905255021552961	-0.094822910394561	V_12111353	12111353	V_15619566	15619566
X_5291269	X	5291269	A_12_P101155	3.31634524714436	3.08346917244071	1	0.0876385619546829	-0.295105703147939	X_4175841	4175841	X_5676445	5676445
X_3843271	X	3843271	A_12_P101158	3.51414213779088	3.0810466201234	1	0.0943804790545124	-0.306246454895286	X_3713398	3713398	X_4501238	4501238
I_1781611	I	1781611	A_12_P101160	6.11405901497864	2.97990631516411	1	0.0241381141874076	0.154868874332996	I_1749612	1749612	I_1934140	1934140
I_1781611	I	1781611	A_12_P101160	4.55405582779019	3.12187076413083	2	0.0241381141874076	0.154868874332996	I_1749612	1749612	I_1934140	1934140
I_1781611	I	1781611	A_12_P101160	3.37243646294053	2.98304380252536	3	0.0241381141874076	0.154868874332996	I_1749612	1749612	I_2032213	2032213
X_4958735	X	4958735	A_12_P101174	4.72876850200617	2.96716605078352	1	0.122482162607505	-0.348872232401478	X_4483054	4483054	X_6159202	6159202
II_9186	II	9186	A_12_P101179	47.232363437903	3.10484959274978	1	0.642752088601348	0.799193107224594	II_6368	6368	II_343260	343260
V_5045041	V	5045041	A_12_P101181	3.39261624653222	2.99435772577624	1	0.0879575210381497	0.295642231560268	V_4520286	4520286	V_5281983	5281983
V_5045041	V	5045041	A_12_P101182	2.96200579481261	2.87286006615914	1	0.0772664318432172	0.277092907599035	V_4310051	4310051	V_5237566	5237566
IV_10776966	IV	10776966	A_12_P101202	37.3445502446532	3.11300936854528	1	0.616400475885629	-0.782623285528172	IV_10743150	10743150	IV_11570976	11570976
X_13708374	X	13708374	A_12_P101203	3.41871431812161	3.02068948236048	1	0.0947605672956332	0.306850121074287	X_13346105	13346105	X_14477626	14477626
V_4385285	V	4385285	A_12_P101207	6.41347131825843	3.01300320046605	1	0.163079342814441	0.402558923103594	V_4165560	4165560	V_4497523	4497523
V_17780513	V	17780513	A_12_P101207	4.24663882945364	3.02375239648513	2	0.124562736037691	0.351822856851985	V_17337910	17337910	V_17814313	17814313
X_6159202	X	6159202	A_12_P101208	3.75477387009478	3.09888827940802	1	0.102846338574699	-0.319686575033452	X_5615449	5615449	X_6885628	6885628
IV_2135122	IV	2135122	A_12_P101222	5.38440484262218	3.07874994961277	1	0.144255509851397	0.378613579383837	IV_2060632	2060632	IV_2185390	2185390
X_6597806	X	6597806	A_12_P101224	3.33219006423878	2.99789324981002	1	0.100379154155846	0.315732298200842	X_5341098	5341098	X_7802067	7802067
III_9692506	III	9692506	A_12_P101231	5.64180730838505	3.15794758371609	1	0.150270283740248	0.38642617356501	III_9143646	9143646	III_10418745	10418745
V_6236729	V	6236729	A_12_P101235	31.5925656275814	2.95704961757713	1	0.551474543905652	0.74027437517974	V_5790711	5790711	V_6526389	6526389
I_1169919	I	1169919	A_12_P101235	3.09169570063918	3.05562411188851	2	0.0310817973601867	0.17574502655245	I_854751	854751	I_1688137	1688137
X_3088382	X	3088382	A_12_P101244	3.61256308152481	3.06954274543243	1	0.0996258798436264	-0.314628860881197	X_2597696	2597696	X_3480739	3480739
II_4797215	II	4797215	A_12_P101246	5.39004403722442	2.88800650266281	1	0.144800498200089	-0.379320496876614	II_4645641	4645641	II_5465868	5465868
III_11859506	III	11859506	A_12_P101250	4.06670633416394	3.21782601778187	1	0.109174940553155	-0.329375630104762	III_11411166	11411166	III_12216028	12216028
IV_15402798	IV	15402798	A_12_P101254	3.321206682711	2.93573275467636	1	0.0910668445668478	-0.30081634286202	IV_15108346	15108346	IV_15636170	15636170
V_1459352	V	1459352	A_12_P101259	3.24864549398479	3.02501776712791	1	0.0885183135824997	0.296583200180237	V_691031	691031	V_2117045	2117045
IV_7016150	IV	7016150	A_12_P101260	3.33618540920208	3.06759284714648	1	0.0881379423524844	-0.295945291685849	IV_4818285	4818285	IV_8995270	8995270
III_12135744	III	12135744	A_12_P101265	3.51747614324369	3.05284192568698	1	0.114788792887888	-0.337509322183105	III_11767486	11767486	III_12348752	12348752
V_18273719	V	18273719	A_12_P101267	25.2674355819763	3.13200332927228	1	0.507370913917636	-0.709983307968219	V_18247185	18247185	V_18326576	18326576
II_5911690	II	5911690	A_12_P101271	5.71871139545333	2.87534617428097	1	0.151284285835348	0.387727755441273	II_5463446	5463446	II_7692763	7692763
IV_15619530	IV	15619530	A_12_P101274	3.28706560685232	3.08327865090272	1	0.0881942343726633	0.296039783903006	IV_15520335	15520335	IV_16497251	16497251
V_20574869	V	20574869	A_12_P101275	5.40063378990446	3.00326732057846	1	0.136959245035878	0.368914442840452	V_20128871	20128871	V_20921615	20921615
V_4261110	V	4261110	A_12_P101280	3.02953171427504	2.83643474025242	1	0.083748527611417	0.288452259487685	V_4121406	4121406	V_4763332	4763332
V_19398565	V	19398565	A_12_P101291	19.2393012038736	3.01642452758224	1	0.427192067569257	0.651540731655303	V_19398038	19398038	V_19399167	19399167
X_7801408	X	7801408	A_12_P101297	3.45558359124899	3.0463243415959	1	0.098172675107739	0.313319848610943	X_6102000	6102000	X_8217033	8217033
X_5576572	X	5576572	A_12_P101305	4.06333013358201	2.91757201412509	1	0.107824725739789	0.32733252635601	X_4630882	4630882	X_5922452	5922452
IV_1575852	IV	1575852	A_12_P101321	4.05629244506939	3.06160494776799	1	0.110735430991392	-0.331721241014008	IV_1500428	1500428	IV_1837056	1837056
V_3551664	V	3551664	A_12_P101325	5.25308169628728	3.09936462820652	1	0.141497282201269	-0.374961365512153	V_3165894	3165894	V_3844800	3844800
V_11671299	V	11671299	A_12_P101325	4.34890827920835	3.07453725672497	2	0.097896746464388	-0.311886518318064	V_11591667	11591667	V_12279420	12279420
V_11637718	V	11637718	A_12_P101333	5.24253993743461	3.05070779310655	1	0.134807176435695	0.366004552647561	V_10332855	10332855	V_13155451	13155451
IV_4761504	IV	4761504	A_12_P101339	5.10529630773996	3.02837303347627	1	0.133490062713314	0.364212166972032	IV_4208432	4208432	IV_6109938	6109938
X_4179483	X	4179483	A_12_P101343	4.29804156832745	3.05780700422553	1	0.115007242798095	-0.338059058162408	X_3713398	3713398	X_5341098	5341098
II_4854419	II	4854419	A_12_P101343	3.37599125406275	3.15855239781937	2	0.0882703152032621	-0.296167445861538	II_4209585	4209585	II_5911690	5911690
II_3087757	II	3087757	A_12_P101351	3.20454240880723	2.99195363459892	1	0.0833044668804466	-0.287716074309013	II_2907352	2907352	II_3124630	3124630
X_4721441	X	4721441	A_12_P101356	4.80851173092329	3.09924505002172	1	0.125065429948672	-0.352532062254695	X_4536045	4536045	X_5576572	5576572
II_4905764	II	4905764	A_12_P101356	4.35191637556624	2.95661441070604	2	0.120345952086069	-0.345816511036783	II_4619734	4619734	II_5762423	5762423
IV_4037719	IV	4037719	A_12_P101358	52.7452865148708	3.2253495465861	1	0.756915192684535	-0.867268539596917	IV_3988400	3988400	IV_4250670	4250670
I_9554938	I	9554938	A_12_P101375	5.68509306310871	2.83907318028453	1	0.145420618922241	-0.379935981009248	I_7969987	7969987	I_10093210	10093210
X_4402562	X	4402562	A_12_P101383	3.49936332074387	3.04872216607449	1	0.0936068258028413	-0.304988694262559	X_3789476	3789476	X_5526747	5526747
V_13010814	V	13010814	A_12_P101389	5.599864417233	3.03126951546385	1	0.146019577502143	0.380921534412913	V_12298716	12298716	V_14362950	14362950
II_14189728	II	14189728	A_12_P101396	3.33627458082865	3.06943283963737	1	0.0865662542745272	0.293294753488268	II_13738578	13738578	II_15274701	15274701
I_1516275	I	1516275	A_12_P101398	3.62700669259645	3.04805438018552	1	0.0360999826731101	0.189401527863233	I_1419429	1419429	I_1623032	1623032
III_3326662	III	3326662	A_12_P101402	7.0133491620149	3.1117836530177	1	0.181202880209366	-0.424338590577539	III_3303150	3303150	III_3437658	3437658
II_13443507	II	13443507	A_12_P101405	3.31178030018527	2.87308785345168	1	0.0888260556490685	0.297098302268835	II_13194469	13194469	II_13542748	13542748
V_17846159	V	17846159	A_12_P101407	11.963920991539	3.09940899606232	1	0.273379334636338	-0.52121009943384	V_17814540	17814540	V_17853669	17853669
V_5237566	V	5237566	A_12_P101408	21.1052895288702	3.01694021269465	1	0.458585081425591	0.674957831505753	V_5235073	5235073	V_5281983	5281983
III_13111797	III	13111797	A_12_P101422	12.7532139343981	3.07458164141134	1	0.309652281599294	0.554700330838382	III_12640270	12640270	III_13191926	13191926
V_5045041	V	5045041	A_12_P101426	4.07245267574388	3.00728626409508	1	0.104567232081597	0.322350083812481	V_4613377	4613377	V_5237566	5237566
IV_776733	IV	776733	A_12_P101431	8.96278947311124	3.01328541077049	1	0.222680204808199	0.470394341402336	IV_122764	122764	IV_872114	872114
II_9430890	II	9430890	A_12_P101433	4.61539278831857	3.04388256733843	1	0.124013911032909	0.351046933227311	II_9115410	9115410	II_9842467	9842467
X_15825470	X	15825470	A_12_P101434	3.91064603895076	2.97761218313719	1	0.106573768585299	-0.325428169203555	X_15342885	15342885	X_16056012	16056012
X_14346521	X	14346521	A_12_P101435	69.2494325944004	3.11224496855147	1	0.862660353919838	0.925869762495099	X_14334563	14334563	X_14477626	14477626
V_5215297	V	5215297	A_12_P101436	3.02452508246993	2.87720235522053	1	0.0788269315467388	-0.279877052795804	V_4964433	4964433	V_5602246	5602246
II_11324153	II	11324153	A_12_P101461	8.34494442801722	2.95673909429026	1	0.215353093214388	-0.462590638635865	II_10693447	10693447	II_11654614	11654614
IV_13902731	IV	13902731	A_12_P101470	3.68579667330085	2.90819665122776	1	0.103589900511146	0.320771984873255	IV_13388220	13388220	IV_14376301	14376301
II_3825337	II	3825337	A_12_P101477	3.30566967384084	3.01580078422809	1	0.0893921847296954	0.298043570189654	II_3570582	3570582	II_4797215	4797215
V_18035554	V	18035554	A_12_P101483	4.49226003886312	2.95484763635155	1	0.117943357638975	-0.342347156429638	V_17916382	17916382	V_18174312	18174312
X_5361887	X	5361887	A_12_P101488	4.46191459018479	2.97882636664322	1	0.121157194620473	0.346937051252025	X_4630882	4630882	X_5676445	5676445
X_4758185	X	4758185	A_12_P101501	4.34540852201693	3.04283815251599	1	0.118782703445156	0.3435205174459	X_3789476	3789476	X_5676445	5676445
X_5569019	X	5569019	A_12_P101509	3.55040468836382	3.00281436578167	1	0.0953051861458142	0.307743046159231	X_5383095	5383095	X_5810100	5810100
I_5480997	I	5480997	A_12_P101523	3.82756426393251	3.06517798829103	1	0.0642535895726477	-0.252684544336223	I_4961504	4961504	I_6651082	6651082
V_5030874	V	5030874	A_12_P101523	3.34958934324185	3.00941390414893	2	0.0888949887475931	0.297213560875086	V_4445869	4445869	V_5237566	5237566
V_17933106	V	17933106	A_12_P101525	24.1161698694418	3.14287830967666	1	0.484050015749874	-0.695549637633285	V_17856801	17856801	V_17938642	17938642
III_483064	III	483064	A_12_P101527	3.78149471985753	2.99449404435108	1	0.102816688347258	-0.319640489469961	III_4664	4664	III_836640	836640
III_11913630	III	11913630	A_12_P101537	3.10233625364574	3.05028651660905	1	0.0834573509446713	-0.287979967957876	III_11765429	11765429	III_12135744	12135744
III_4664	III	4664	A_12_P101540	32.3451735172284	3.14877270795879	1	0.669885835534808	0.818214344271306	III_4664	4664	III_29436	29436
V_5237566	V	5237566	A_12_P101543	8.32442439228584	2.9651397504965	1	0.206095555260692	0.452547629316444	V_5235073	5235073	V_5571503	5571503
II_7946758	II	7946758	A_12_P101564	3.38635639401547	3.10825964668417	1	0.0925923137479599	-0.303331455922495	II_7231857	7231857	II_9430890	9430890
I_3682557	I	3682557	A_12_P101569	5.38586456292345	3.01822830098086	1	0.0532853301119188	-0.230188323796581	I_3594690	3594690	I_3923864	3923864
III_2457354	III	2457354	A_12_P101570	3.19739026494885	2.99002950159742	1	0.084638418327853	0.29001051917379	III_2336457	2336457	III_2625072	2625072
IV_15525171	IV	15525171	A_12_P101582	4.52164086739839	2.92524955076974	1	0.119714103758898	0.344907501900629	IV_15393010	15393010	IV_15983752	15983752
V_4492637	V	4492637	A_12_P101582	3.91734190417629	3.04398309388774	2	0.0704971209044103	-0.264676675937859	V_2273283	2273283	V_4792309	4792309
IV_15966979	IV	15966979	A_12_P101584	3.17076320722322	2.99344954274115	1	0.084409706389369	0.289618417461376	IV_15393010	15393010	IV_17490756	17490756
X_3843271	X	3843271	A_12_P101601	3.21373401417144	3.08330471103713	1	0.0866825077322384	-0.293491626333075	X_3136351	3136351	X_4322768	4322768
X_5176675	X	5176675	A_12_P101602	11.0507329954271	2.90733729805623	1	0.263487294123702	-0.511693405596037	X_4891523	4891523	X_5526747	5526747
II_3288020	II	3288020	A_12_P101608	43.332798283824	3.01310653483992	1	0.670657825913259	-0.816184272501585	II_3287146	3287146	II_3331906	3331906
V_5107998	V	5107998	A_12_P101610	4.44234384671744	2.84388221293442	1	0.111901548789727	0.333463289529756	V_4847449	4847449	V_6850366	6850366
II_9430890	II	9430890	A_12_P101612	27.1916077313157	3.11124784693261	1	0.582707333323451	0.760678944671563	II_9336865	9336865	II_9651692	9651692
III_8009505	III	8009505	A_12_P101612	4.94325438554792	3.08153434434028	2	0.154514633593675	0.391706665351041	III_5553601	5553601	III_9174716	9174716
X_11328403	X	11328403	A_12_P101614	3.9601953129807	2.93592219663376	1	0.10609926311686	-0.32470289828374	X_9591109	9591109	X_12932361	12932361
IV_10776966	IV	10776966	A_12_P101614	3.7739639155301	3.01683086113129	2	0.0865131561059077	0.293204788852213	IV_7666716	7666716	IV_12621984	12621984
V_9985933	V	9985933	A_12_P101614	3.43194073042349	3.15527067594808	3	0.0757284322942878	-0.274321258465136	V_9005254	9005254	V_10458053	10458053
I_2928045	I	2928045	A_12_P101618	13.9770091416373	2.93969280524347	1	0.0719376992085809	0.269153485295655	I_2862749	2862749	I_2931464	2931464
I_2874023	I	2874023	A_12_P101618	9.04693549252713	2.96700698193664	2	0.0706777972488566	0.265015627465157	I_2862749	2862749	I_3095308	3095308
I_3015345	I	3015345	A_12_P101618	6.07773380984337	2.97410437116497	3	0.0834575842073647	0.287980370408561	I_2862749	2862749	I_3174340	3174340
I_2874023	I	2874023	A_12_P101618	3.45501204555783	3.00101662272394	4	0.0706777972488566	0.265015627465157	I_2862749	2862749	I_3174340	3174340
V_11513193	V	11513193	A_12_P101626	3.24899623818635	2.92328150400018	1	0.0866456516864089	0.293423348569711	V_9889822	9889822	V_11806498	11806498
I_4715035	I	4715035	A_12_P101630	6.60411893833818	2.92126094169623	1	0.092278498421027	-0.302816991772967	I_4256443	4256443	I_4843830	4843830
V_690925	V	690925	A_12_P101630	5.92091648507163	3.04201248348587	2	0.152142776021516	-0.38783940415626	V_8249	8249	V_690972	690972
II_5429933	II	5429933	A_12_P101637	3.42415504256911	2.96161106135644	1	0.0930675265373183	0.304108855809458	II_4648873	4648873	II_9894694	9894694
II_2530349	II	2530349	A_12_P101638	18.2184170369217	3.07170300449889	1	0.367835388312701	-0.604584120034199	II_2513970	2513970	II_2589650	2589650
X_3843271	X	3843271	A_12_P101639	3.25307107063068	3.08209156498363	1	0.0964734459709183	0.309528854649731	X_3136351	3136351	X_3940409	3940409
V_12403730	V	12403730	A_12_P101644	21.4040560255962	3.02381151099529	1	0.451706373064103	0.671936324980249	V_12279420	12279420	V_12861006	12861006
V_5722437	V	5722437	A_12_P101647	13.5050062668729	3.09866934796903	1	0.302196224305789	-0.547992353159673	V_5699019	5699019	V_5856208	5856208
IV_13902731	IV	13902731	A_12_P101648	16.2883725078013	2.97602914163657	1	0.361803650702231	-0.599606667777908	IV_13754511	13754511	IV_14237700	14237700
IV_13356132	IV	13356132	A_12_P101649	4.76975644800325	3.05377532035832	1	0.12872895260437	0.357636361421419	IV_13068189	13068189	IV_13392021	13392021
V_13010814	V	13010814	A_12_P101649	3.52182519268582	3.01527450087731	2	0.0984762631774131	0.312801862334805	V_11558601	11558601	V_13622608	13622608
I_3682557	I	3682557	A_12_P101650	5.42039053454938	3.08922537566749	1	0.0560339301881084	-0.23670755713064	I_3667385	3667385	I_4187461	4187461
X_9642366	X	9642366	A_12_P101679	5.60238874052974	3.08272702116886	1	0.153260405747078	0.390203413297131	X_8058569	8058569	X_10545442	10545442
IV_4656772	IV	4656772	A_12_P101694	4.55407413562642	2.94337885284561	1	0.129203010276649	0.358231792229513	IV_3958558	3958558	IV_4818285	4818285
V_13155451	V	13155451	A_12_P101699	14.7766916606594	2.99700621709203	1	0.338137031681487	0.579664026556324	V_12975400	12975400	V_13228106	13228106
II_13897233	II	13897233	A_12_P101708	15.30806540956	2.97453836475245	1	0.338738681872572	-0.580179498009977	II_13882420	13882420	II_14071163	14071163
X_4167697	X	4167697	A_12_P101711	4.42555630921175	3.03397030079308	1	0.117329814237712	-0.341455547440258	X_3814926	3814926	X_5361887	5361887
X_3843271	X	3843271	A_12_P101729	4.46345566114652	3.00349573107697	1	0.118271059932281	-0.342822427486962	X_3713398	3713398	X_4501238	4501238
X_5569019	X	5569019	A_12_P101732	4.79109122364182	3.00775834659583	1	0.126365091615969	0.354359058882506	X_4630882	4630882	X_5810100	5810100
V_14290503	V	14290503	A_12_P101739	27.975653689707	3.09858726262937	1	0.516181686844613	-0.718403627375121	V_14146627	14146627	V_15066983	15066983
X_3843271	X	3843271	A_12_P101745	3.08030678152718	3.05041738811281	1	0.0832418892385253	-0.287607989012724	X_2672640	2672640	X_4175841	4175841
X_3843271	X	3843271	A_12_P101755	3.98740966799637	3.04066286120642	1	0.106372916761113	-0.325121369193123	X_3713398	3713398	X_3907685	3907685
III_11767486	III	11767486	A_12_P101759	8.62109415424628	2.9849613649745	1	0.216338550456697	0.463657126163832	III_11572261	11572261	III_11847455	11847455
X_5638607	X	5638607	A_12_P101762	3.20384373995923	3.04573475278404	1	0.0864279284001205	0.293060329153214	X_4785093	4785093	X_7044171	7044171
IV_11570976	IV	11570976	A_12_P101763	7.08582877099321	3.03565981199128	1	0.176406971800927	-0.419780803630848	IV_10365714	10365714	IV_12512951	12512951
II_2513769	II	2513769	A_12_P101763	5.39769489679624	3.09721085569107	2	0.155737302842173	0.39339270830823	II_2332147	2332147	II_2568794	2568794
V_12609412	V	12609412	A_12_P101763	3.92624058724922	3.17801750155298	3	0.065935957319213	0.255971220577131	V_11503957	11503957	V_13725447	13725447
III_1200042	III	1200042	A_12_P101767	14.2068684753201	3.01888844366597	1	0.386115519295986	-0.618949910575554	III_1198473	1198473	III_1275807	1275807
I_13316670	I	13316670	A_12_P101769	30.2313881331069	3.07046651934669	1	0.54026982895558	-0.732700757238855	I_13307128	13307128	I_13351874	13351874
IV_15712992	IV	15712992	A_12_P101773	12.0654647463159	3.03045475170568	1	0.290717088759528	-0.537483655003815	IV_15678791	15678791	IV_15881855	15881855
V_13010814	V	13010814	A_12_P101804	2.98397782059133	2.97062789358482	1	0.0807496266710631	0.283269778451256	V_8012630	8012630	V_13855621	13855621
I_12833013	I	12833013	A_12_P101805	5.91516959612823	3.1214000602334	1	0.143692941649463	-0.377874598850861	I_12804294	12804294	I_12932809	12932809
V_9104120	V	9104120	A_12_P101810	5.54420130914751	2.8794649634599	1	0.14195882274983	0.375587539683148	V_8766484	8766484	V_9985933	9985933
IV_7328515	IV	7328515	A_12_P101816	51.0887296957644	3.05912506756839	1	0.750024221886188	-0.86331169829628	IV_7283800	7283800	IV_7396833	7396833
IV_15746218	IV	15746218	A_12_P101817	5.41739442070435	2.92905172751663	1	0.142176825446656	-0.375875819355173	IV_15520335	15520335	IV_15954820	15954820
X_3843271	X	3843271	A_12_P101819	3.50101242288728	3.00143953783908	1	0.0940454274033986	-0.305702382600963	X_3713398	3713398	X_5341098	5341098
I_12098639	I	12098639	A_12_P101827	5.58278445575383	2.98529499042669	1	0.114285779043798	-0.336997033457634	I_11992373	11992373	I_12277687	12277687
V_1422457	V	1422457	A_12_P101827	3.9003260167267	2.92301864940192	2	0.106714306560695	0.325642668272965	V_708390	708390	V_1796786	1796786
V_15635975	V	15635975	A_12_P101837	7.36777058061576	3.04034239665265	1	0.18285184941699	0.42626498540865	V_15305596	15305596	V_15665189	15665189
X_5526747	X	5526747	A_12_P101838	6.85150342794596	3.01415803029545	1	0.174802729439316	0.416777328082813	X_4674201	4674201	X_5810100	5810100
II_3373865	II	3373865	A_12_P101839	3.51084692691422	2.89549188789554	1	0.0941701700829745	-0.305846969821654	II_3116384	3116384	II_3542182	3542182
III_1402564	III	1402564	A_12_P101843	9.09236976721077	3.10950210440529	1	0.231441117504775	-0.47956804834368	III_1395216	1395216	III_1460260	1460260
I_12649342	I	12649342	A_12_P101844	27.9591938410821	3.02724095845139	1	0.483716750905896	-0.693306935771962	I_12625280	12625280	I_12732062	12732062
II_13223252	II	13223252	A_12_P101855	17.6915521783477	2.9842167604732	1	0.395225946259815	-0.626556799604437	II_13194469	13194469	II_13225059	13225059
IV_5847069	IV	5847069	A_12_P101855	5.43472750064563	3.06758542133584	2	0.101320766726482	-0.317239281269937	IV_4785460	4785460	IV_6271528	6271528
I_13709331	I	13709331	A_12_P101862	5.0825641306009	3.017950838371	1	0.133501471385857	-0.364227730259996	I_13440345	13440345	I_13875092	13875092
V_12931140	V	12931140	A_12_P101863	6.33772259409381	2.97382671042302	1	0.164190301654882	-0.403927788408086	V_12298716	12298716	V_13690761	13690761
II_14608351	II	14608351	A_12_P101867	3.14734419135	3.07441524825622	1	0.0858667123957117	-0.292089514964419	II_14218855	14218855	II_15274701	15274701
V_708608	V	708608	A_12_P101868	12.2352640029039	3.12476547958107	1	0.288721755958557	-0.534051088600036	V_691031	691031	V_1062760	1062760
X_3843271	X	3843271	A_12_P101878	3.60448709433021	3.03681147410224	1	0.0966825023646519	-0.309958765502839	X_3713398	3713398	X_3907685	3907685
X_4455978	X	4455978	A_12_P101879	3.56162536527543	3.11281531306669	1	0.0947536901160814	-0.306851356454748	X_3946591	3946591	X_5390152	5390152
III_10293762	III	10293762	A_12_P101884	6.29544520034278	3.06147049342686	1	0.166514779938677	0.406776987023316	III_9993581	9993581	III_10500696	10500696
X_7002637	X	7002637	A_12_P101896	7.86059450536679	3.00779919423843	1	0.203410852719294	-0.449590412687125	X_6864316	6864316	X_8030746	8030746
I_3174340	I	3174340	A_12_P101898	2.94567888954289	2.04358495769163	1	0.022824628223743	-0.1506023808007	I_2928045	2928045	I_3894133	3894133
III_968943	III	968943	A_12_P101899	22.8733022962224	3.03260256509205	1	0.493791096789143	-0.7026315337281	III_943410	943410	III_977059	977059
II_14608351	II	14608351	A_12_P101902	6.57520925307663	2.98639087787902	1	0.169117704869618	0.409943985814718	II_14229519	14229519	II_15274701	15274701
IV_4844241	IV	4844241	A_12_P101902	3.49621713665949	3.07694414197506	2	0.0707957437623109	-0.26523666321275	IV_4384113	4384113	IV_5646749	5646749
V_19847166	V	19847166	A_12_P101912	3.28922266598168	3.03226245546548	1	0.0874154988934708	-0.294729903270032	V_19703293	19703293	V_19994937	19994937
I_9729023	I	9729023	A_12_P101918	5.55212417901068	3.02483904591638	1	0.125223692949219	-0.352755046106094	I_9523381	9523381	I_10158231	10158231
V_6850366	V	6850366	A_12_P101918	5.12418022804927	2.86688204149728	2	0.0951463443170958	0.307486486915858	V_5699019	5699019	V_7335689	7335689
X_3796301	X	3796301	A_12_P101918	4.19862804870219	3.04069083160924	3	0.0666026838681237	-0.257262121315832	X_3157218	3157218	X_3907685	3907685
I_9429198	I	9429198	A_12_P101919	7.25020920766078	2.96499881417621	1	0.150804262612147	-0.387080523774598	I_9348087	9348087	I_9554938	9554938
IV_15619530	IV	15619530	A_12_P101933	3.34610584245846	3.08107644583099	1	0.0931367095911547	0.304177527244678	IV_15391532	15391532	IV_16053550	16053550
V_5045041	V	5045041	A_12_P101936	3.41637352292957	3.1118556049738	1	0.0885434885956142	0.296625371991085	V_4959381	4959381	V_5269261	5269261
I_10579627	I	10579627	A_12_P101944	2.83157261009725	2.62406880500779	1	0.068619730375641	0.261128626818945	I_9000872	9000872	I_10856205	10856205
II_13744022	II	13744022	A_12_P101946	3.40934819090443	3.02700346601204	1	0.0913159275221953	0.301233486705283	II_13371813	13371813	II_14030884	14030884
III_681953	III	681953	A_12_P101959	29.3235850721825	3.14725819264978	1	0.562306559355961	-0.747509224100097	III_674333	674333	III_865404	865404
X_6953360	X	6953360	A_12_P101959	3.25334938304199	3.09515944335676	2	0.0636070501317353	0.251410035184127	X_6300921	6300921	X_8812644	8812644
V_5045041	V	5045041	A_12_P101961	3.66395578419359	3.04302415672984	1	0.0946261106235918	0.30664470948049	V_4959381	4959381	V_5261629	5261629
X_5361887	X	5361887	A_12_P101968	5.178764068238	3.0424471003747	1	0.133992413127474	0.36489682589474	X_4630882	4630882	X_5676445	5676445
IV_15398099	IV	15398099	A_12_P101971	3.24645313686908	3.13181621111454	1	0.088177356209699	-0.296011455255269	IV_15378475	15378475	IV_15636170	15636170
X_3843271	X	3843271	A_12_P101980	3.7580722052061	3.16714333901835	1	0.101355553922024	-0.31735479053327	X_3713398	3713398	X_4322768	4322768
II_7161299	II	7161299	A_12_P101987	5.90479252709327	3.00834938944869	1	0.178510400469923	0.420971313563442	II_6570733	6570733	II_9842467	9842467
X_5638607	X	5638607	A_12_P101988	11.0356810584883	2.9783801564848	1	0.273394226371222	0.521181727090175	X_5341098	5341098	X_5676445	5676445
X_5576572	X	5576572	A_12_P101990	3.53810580225834	3.09922082755143	1	0.0945909906122873	0.30658779936854	X_4630882	4630882	X_5922452	5922452
X_4862702	X	4862702	A_12_P102000	4.83662746448018	3.0077845491636	1	0.125084854607268	0.352559438121405	X_4171941	4171941	X_5676445	5676445
II_2889649	II	2889649	A_12_P102000	3.13425342468112	3.0821474331023	2	0.104396285138903	0.322062739676445	II_2628218	2628218	II_3199009	3199009
IV_8179349	IV	8179349	A_12_P102002	3.69094931573716	2.49602466352322	1	0.0975324702875059	0.311318259221478	IV_6945644	6945644	IV_8986377	8986377
II_6697935	II	6697935	A_12_P102005	3.16061266000893	2.93102133827744	1	0.0866983613532099	0.293518463883103	II_4364919	4364919	II_11891426	11891426
II_1990551	II	1990551	A_12_P102006	14.8886238603503	2.98483756233919	1	0.276014085884911	-0.523477194380823	II_1988126	1988126	II_2196572	2196572
X_3843271	X	3843271	A_12_P102008	4.24736476575936	2.98110242834223	1	0.112890480136569	-0.334933541343417	X_3713398	3713398	X_4566632	4566632
IV_1586020	IV	1586020	A_12_P102009	3.84571062591113	3.01660263956707	1	0.10506766375986	-0.32312050514186	IV_1497020	1497020	IV_1791440	1791440
X_3843271	X	3843271	A_12_P102021	4.20049469000118	3.06353856162011	1	0.111718982464126	0.333191157377095	X_3713398	3713398	X_3863779	3863779
IV_15380612	IV	15380612	A_12_P102025	7.88203939470424	3.02637195754774	1	0.197316865401255	-0.442804560530269	IV_15108346	15108346	IV_15442610	15442610
I_1185402	I	1185402	A_12_P102028	10.1096785574988	3.06877439686826	1	0.131150623723315	0.360860745240839	I_1156845	1156845	I_1234526	1234526
I_1185402	I	1185402	A_12_P102028	3.23401895315854	2.96828047878027	2	0.131150623723315	0.360860745240839	I_627305	627305	I_1280348	1280348
I_10575568	I	10575568	A_12_P102030	3.09629981966355	2.87799987280036	1	0.0755120688801885	0.273929097045177	I_10147200	10147200	I_11255799	11255799
V_15619566	V	15619566	A_12_P102032	12.4472637582489	3.11417561751502	1	0.289644077743405	0.536490835781091	V_15339524	15339524	V_15651566	15651566
X_5361887	X	5361887	A_12_P102037	5.65042043537376	3.12156065605919	1	0.147951323920343	0.383409595599505	X_3934740	3934740	X_5676445	5676445
II_6331341	II	6331341	A_12_P102038	35.1265884855579	3.07440779331741	1	0.643188863458608	-0.799382456898566	II_6299394	6299394	II_6548478	6548478
V_2064625	V	2064625	A_12_P102045	3.81668801260663	2.98349528315507	1	0.104450236224208	0.32216970139901	V_1800608	1800608	V_2819635	2819635
I_11150607	I	11150607	A_12_P102045	3.0882906061513	2.81398520503466	2	0.0516115935744742	0.226466316164291	I_10933295	10933295	I_11388363	11388363
X_3104255	X	3104255	A_12_P102047	3.1099495524465	2.96501318983147	1	0.0851522335350842	-0.29088947195885	X_2618371	2618371	X_4322768	4322768
X_3843271	X	3843271	A_12_P102054	3.09968934862007	2.98294910794395	1	0.0837425232308569	-0.28847155959438	X_2518073	2518073	X_4501238	4501238
II_14216872	II	14216872	A_12_P102069	3.23693222363242	3.03237309062211	1	0.0823235161805806	0.28601705931147	II_13669810	13669810	II_15274701	15274701
IV_11936372	IV	11936372	A_12_P102090	8.09574523934757	3.147611139935	1	0.225039643609778	0.472698231188328	IV_10743150	10743150	IV_12722332	12722332
III_2703636	III	2703636	A_12_P102095	8.02400064021059	3.00520867785114	1	0.203755039815327	-0.449970623016097	III_2674957	2674957	III_2747582	2747582
IV_14547789	IV	14547789	A_12_P102097	4.00473572831975	2.96645272208821	1	0.104798811562707	0.322706832187204	IV_13418977	13418977	IV_15091125	15091125
II_9761097	II	9761097	A_12_P102105	9.12461945160825	3.05816304647921	1	0.231129453696588	-0.479245041011085	II_9360560	9360560	II_9894694	9894694
V_533022	V	533022	A_12_P102106	40.5719405980376	3.11537569755054	1	0.668217591993628	0.814871134369655	V_532659	532659	V_533525	533525
X_5576572	X	5576572	A_12_P102115	5.64132649088325	3.01804979732643	1	0.146394705006505	0.381410518459271	X_5383095	5383095	X_6159202	6159202
X_4635054	X	4635054	A_12_P102123	12.1013278157099	3.10311408931502	1	0.287148940267532	-0.534153504271666	X_4504557	4504557	X_5291269	5291269
X_11277451	X	11277451	A_12_P102123	5.9292521128999	3.04449620658163	2	0.257032821693186	-0.505366866704433	X_10105925	10105925	X_13066152	13066152
IV_15712992	IV	15712992	A_12_P102123	3.9702854337108	2.93013307484104	3	0.0180314729350282	0.133852989465851	IV_15564470	15564470	IV_16207052	16207052
V_5097086	V	5097086	A_12_P102124	4.44427169111083	3.0614267160718	1	0.111106207258863	0.332276129267714	V_4964433	4964433	V_5269306	5269306
I_1781611	I	1781611	A_12_P102147	23.0564097179109	2.79505737382018	1	0.0707586681230936	0.265167202069066	I_1767344	1767344	I_1868286	1868286
I_1781611	I	1781611	A_12_P102147	18.1989522020384	2.84683494627824	2	0.0707586681230936	0.265167202069066	I_1767344	1767344	I_1934140	1934140
I_2162336	I	2162336	A_12_P102147	15.2395713821379	2.94068519903911	3	0.0450547041788372	0.211592394143725	I_2160112	2160112	I_2190014	2190014
I_2162336	I	2162336	A_12_P102147	12.8607201561804	2.99973604320533	4	0.0450547041788372	0.211592394143725	I_2160112	2160112	I_2190014	2190014
I_1781611	I	1781611	A_12_P102147	10.9918808107992	2.95704152908905	5	0.0707586681230936	0.265167202069066	I_1767344	1767344	I_1934140	1934140
I_2162336	I	2162336	A_12_P102147	8.80482965225967	2.98237953295076	6	0.0450547041788372	0.211592394143725	I_2160112	2160112	I_2190014	2190014
I_2162336	I	2162336	A_12_P102147	7.32350669137084	2.84887928020521	7	0.0450547041788372	0.211592394143725	I_2160112	2160112	I_2190014	2190014
I_1781611	I	1781611	A_12_P102147	6.27655424314458	2.98154728941823	8	0.0707586681230936	0.265167202069066	I_1749612	1749612	I_2114448	2114448
I_2162336	I	2162336	A_12_P102147	4.84019640798919	2.92656523990153	9	0.0450547041788372	0.211592394143725	I_1749612	1749612	I_2190014	2190014
X_4958735	X	4958735	A_12_P102147	4.44085582132844	3.00219935965142	10	0.0394210277379871	0.197921946094728	X_3934740	3934740	X_5676445	5676445
I_2162336	I	2162336	A_12_P102147	5.96303023268277	2.91680926705375	11	0.0450547041788372	0.211592394143725	I_1749612	1749612	I_2190014	2190014
I_2162336	I	2162336	A_12_P102147	4.92584612140065	2.8682368129492	12	0.0450547041788372	0.211592394143725	I_1749612	1749612	I_2190014	2190014
I_1781611	I	1781611	A_12_P102147	4.12696548699297	2.95402395862008	13	0.0707586681230936	0.265167202069066	I_1749612	1749612	I_2190014	2190014
I_2162336	I	2162336	A_12_P102147	3.21155821353139	2.95418387988261	14	0.0450547041788372	0.211592394143725	I_1749612	1749612	I_2190014	2190014
II_1990551	II	1990551	A_12_P102153	19.2432727302968	2.93440753793401	1	0.23550536292614	-0.483474777230142	II_1988126	1988126	II_2075279	2075279
II_1990551	II	1990551	A_12_P102153	6.42147033861153	2.75121146844226	2	0.23550536292614	-0.483474777230142	II_1988126	1988126	II_2196572	2196572
V_19932372	V	19932372	A_12_P102156	55.8758046131087	3.09186698976319	1	0.771296782977794	-0.875468937092808	V_19900018	19900018	V_19994937	19994937
V_14190544	V	14190544	A_12_P102160	6.93116548374794	2.90734153500464	1	0.172033593595548	0.413462962438939	V_13755243	13755243	V_15269015	15269015
II_1727040	II	1727040	A_12_P102163	13.1770550431271	3.08914719310777	1	0.273783533069069	0.521552670105742	II_1709378	1709378	II_1857282	1857282
X_5361887	X	5361887	A_12_P102169	4.06948025423939	3.04000683733855	1	0.106958172294363	0.3260145386127	X_4504557	4504557	X_5676445	5676445
V_12931140	V	12931140	A_12_P102172	4.23181697138932	3.07178396387711	1	0.112940081088597	-0.335007113526261	V_12298716	12298716	V_13622608	13622608
IV_16529740	IV	16529740	A_12_P102181	3.94917932781583	3.04170134993585	1	0.101579651323783	-0.317711796432217	IV_15954820	15954820	IV_17490756	17490756
IV_4037719	IV	4037719	A_12_P102184	14.6088570497832	3.12899242987932	1	0.33352394015585	0.575696365554016	IV_3953879	3953879	IV_4295474	4295474
X_4656473	X	4656473	A_12_P102186	3.54951047172373	3.05075991533245	1	0.0944476692830873	-0.306355445168601	X_4175841	4175841	X_5569019	5569019
V_9985933	V	9985933	A_12_P102191	3.49512680577778	3.01058569417291	1	0.093499139757532	0.304813213055793	V_8012630	8012630	V_10176051	10176051
X_1509755	X	1509755	A_12_P102218	3.86816704988104	3.02812730521031	1	0.105343024741306	0.323530601429641	X_1366945	1366945	X_2155975	2155975
I_10382536	I	10382536	A_12_P102223	3.50509901597165	2.97518394440033	1	0.0841298971242812	0.289137991752109	I_10045203	10045203	I_10826560	10826560
V_15928368	V	15928368	A_12_P102223	3.26321612344642	3.03349133647666	2	0.0586966957502323	-0.241510940004258	V_15305596	15305596	V_16181609	16181609
X_3843271	X	3843271	A_12_P102229	3.36771606239078	3.00512459947185	1	0.0906366711792932	-0.300111028158231	X_3713398	3713398	X_4505845	4505845
III_2154997	III	2154997	A_12_P102237	7.39945029333336	3.12291927347753	1	0.191613870872815	0.436340922167176	III_2059314	2059314	III_2340339	2340339
I_14525364	I	14525364	A_12_P102237	4.16373351277494	2.93881150157873	2	0.101594869085213	-0.317722784842757	I_14484676	14484676	I_14557357	14557357
V_11513193	V	11513193	A_12_P102257	5.32470275089042	2.88821390567162	1	0.1367612497057	0.368647685547803	V_10121039	10121039	V_12403730	12403730
II_1903099	II	1903099	A_12_P102257	3.47997407113257	3.01777528270337	2	0.06854008678905	0.260977043168201	II_1860584	1860584	II_1990551	1990551
II_14189728	II	14189728	A_12_P102258	3.42428279999182	2.98615359350978	1	0.0986783265528299	-0.313007158645241	II_13909294	13909294	II_14255058	14255058
IV_6766024	IV	6766024	A_12_P102268	3.58776713327659	3.07539239406489	1	0.0939145280073923	-0.305489558902658	IV_4757132	4757132	IV_7698565	7698565
X_5291269	X	5291269	A_12_P102269	4.20911762088387	3.01107102922429	1	0.111928403156324	0.333483003153836	X_4284268	4284268	X_5676445	5676445
X_5576572	X	5576572	A_12_P102273	6.0702194322057	2.96226533622182	1	0.164919047706518	0.404746324737451	X_4350782	4350782	X_5676445	5676445
V_1038256	V	1038256	A_12_P102286	3.5672325068309	3.051309766261	1	0.0957339713012168	0.308434548734057	V_8249	8249	V_1436415	1436415
V_5237566	V	5237566	A_12_P102287	3.87622075252974	3.0480661555592	1	0.104124570464524	0.321647486029719	V_4763332	4763332	V_5796075	5796075
III_12591165	III	12591165	A_12_P102288	36.8022889828815	3.07688090208287	1	0.64809375593283	-0.802507130544496	III_12589611	12589611	III_12643539	12643539
V_19847166	V	19847166	A_12_P102290	3.45661032156917	3.05932104933057	1	0.091645252909936	-0.301776188045891	V_19814096	19814096	V_20038134	20038134
II_1041031	II	1041031	A_12_P102294	4.76606680808162	3.09020995224764	1	0.106707235637577	0.325618752095635	II_6368	6368	II_1296443	1296443
X_4322768	X	4322768	A_12_P102297	3.20363569639964	2.9807801078293	1	0.0864225724984419	-0.293051248601039	X_3713398	3713398	X_5361887	5361887
II_13446733	II	13446733	A_12_P102305	3.23597186102655	3.1394630243901	1	0.0864902536027204	0.293165976442669	II_13194469	13194469	II_13738578	13738578
X_10711645	X	10711645	A_12_P102309	9.07457512830558	3.06959879881969	1	0.224462608587111	-0.472282642141012	X_10439641	10439641	X_11328403	11328403
V_15725416	V	15725416	A_12_P102309	3.04898396032828	3.01458148598294	2	0.0840381546075452	-0.287228476670454	V_14190003	14190003	V_16469911	16469911
V_10220682	V	10220682	A_12_P102323	5.27865532809868	2.97713966576766	1	0.151221759352717	-0.387500732109559	V_9918470	9918470	V_11806498	11806498
II_14138240	II	14138240	A_12_P102329	3.06880967152239	3.03544420581558	1	0.0809263475954513	0.283579577642427	II_13669810	13669810	II_14391450	14391450
V_15834708	V	15834708	A_12_P102339	6.48603808376149	2.9857423851429	1	0.162520185924536	0.399298010470101	V_15665599	15665599	V_16167823	16167823
V_11637718	V	11637718	A_12_P102344	3.43723070882615	2.99478411140552	1	0.0906768228225363	0.300177494724997	V_10201256	10201256	V_13299544	13299544
X_3725790	X	3725790	A_12_P102347	3.11020474048171	2.97681492165442	1	0.0840140086179509	0.288938780067064	X_3136351	3136351	X_3907685	3907685
I_1516275	I	1516275	A_12_P102359	4.10490643127777	2.82817055407654	1	0.040580025837691	0.200810372116093	I_1508520	1508520	I_1549969	1549969
III_1580776	III	1580776	A_12_P102359	2.88784676269582	2.78328874158515	2	0.075739816259352	-0.274341876522152	III_1461736	1461736	III_2069983	2069983
X_4505845	X	4505845	A_12_P102359	2.88288686026612	2.80250558718284	3	0.0618864993436873	-0.247986443333854	X_3843271	3843271	X_5361887	5361887
I_2693910	I	2693910	A_12_P102360	2.90475037197628	2.80280264728937	1	0.0040087776727224	-0.0631154912404964	I_2390778	2390778	I_2826770	2826770
X_5576572	X	5576572	A_12_P102381	5.57945565642792	3.04775496443682	1	0.144915404992214	0.379478572979759	X_4630882	4630882	X_5922452	5922452
II_14608351	II	14608351	A_12_P102396	7.38750622097413	3.20262325668679	1	0.18786272712536	0.432066199256162	II_14218855	14218855	II_15274701	15274701
V_16186731	V	16186731	A_12_P102397	8.03214210595655	2.96229560508272	1	0.193758149613927	-0.438793282650696	V_16060421	16060421	V_16436223	16436223
V_11513193	V	11513193	A_12_P102400	5.95378938939411	3.01384669686695	1	0.151569666890281	0.388093285879902	V_10458053	10458053	V_11671299	11671299
X_3843271	X	3843271	A_12_P102417	3.30096239483446	2.95287918341252	1	0.0889246435940425	0.297263131091008	X_3184463	3184463	X_3907685	3907685
I_1169919	I	1169919	A_12_P102420	3.26821134770959	3.09095655234966	1	0.0397261585796847	-0.198686457831742	I_1036866	1036866	I_1280348	1280348
II_8102088	II	8102088	A_12_P102425	10.1958922648128	2.98375462524401	1	0.254473159440199	-0.502864493992103	II_7367480	7367480	II_9179575	9179575
X_3843271	X	3843271	A_12_P102434	4.44811096677238	3.08474737400436	1	0.117890092728453	-0.342269843258758	X_3716925	3716925	X_3907685	3907685
I_628622	I	628622	A_12_P102438	3.29257260619847	3.06730196768368	1	0.054255973903601	-0.232195480927874	I_398834	398834	I_1041272	1041272
X_5291269	X	5291269	A_12_P102439	7.27151314370168	3.06140983727815	1	0.181727408431068	0.424952313507528	X_4630882	4630882	X_5676445	5676445
III_3437658	III	3437658	A_12_P102446	5.2857094064476	3.12984988169071	1	0.14347511092833	-0.377572849551706	III_3342114	3342114	III_3531924	3531924
V_4385285	V	4385285	A_12_P102460	5.83677121302906	3.13183357607425	1	0.149622988596962	0.385593002415042	V_4165257	4165257	V_4516065	4516065
IV_15573322	IV	15573322	A_12_P102461	5.25725261436905	2.94382196804006	1	0.141389686745149	0.37481107587603	IV_15442610	15442610	IV_15983752	15983752
V_10815911	V	10815911	A_12_P102461	5.02399038552328	2.99666770473142	2	0.130763831649322	0.360451941261609	V_10121039	10121039	V_11806498	11806498
III_1402564	III	1402564	A_12_P102465	43.8499454309422	3.07249592382259	1	0.718923763291672	-0.845223183655778	III_1401486	1401486	III_1452343	1452343
II_11891426	II	11891426	A_12_P102467	3.95306351038076	3.14077651330153	1	0.105918921898653	-0.324426825581906	II_9559785	9559785	II_12049752	12049752
IV_15961314	IV	15961314	A_12_P102477	14.6522289943248	3.13051996728841	1	0.33431887667282	-0.576382028023373	IV_15954820	15954820	IV_15983752	15983752
X_4862702	X	4862702	A_12_P102478	7.28944378034926	3.16091161618851	1	0.188426880622509	0.432670000635167	X_4454441	4454441	X_6076783	6076783
IV_4550944	IV	4550944	A_12_P102481	45.9391406035346	3.16361590962934	1	0.689088036255821	-0.827322962533158	IV_4538310	4538310	IV_4656772	4656772
IV_4844241	IV	4844241	A_12_P102481	3.40410441197478	3.1252044405193	2	0.666045472704643	-0.813372835089166	IV_4750189	4750189	IV_7705207	7705207
X_21056	X	21056	A_12_P102487	4.77430738268835	3.08314758367402	1	0.128339764739392	0.357102665921955	X_21056	21056	X_1594701	1594701
IV_5002403	IV	5002403	A_12_P102491	3.50992980285762	2.92347846419283	1	0.0925034684970956	-0.304084330661014	IV_4727677	4727677	IV_7172090	7172090
IV_9718725	IV	9718725	A_12_P102500	3.64339975019486	2.89084239273097	1	0.0957275205763667	-0.308411723424944	IV_8696159	8696159	IV_12062878	12062878
IV_4250670	IV	4250670	A_12_P102505	3.75735198137893	3.03253109107864	1	0.106161081827689	0.324735802279593	IV_3690986	3690986	IV_6062184	6062184
II_4215249	II	4215249	A_12_P102505	3.48830785338223	3.13457008939762	2	0.0666716469589176	0.257346399455141	II_3816272	3816272	II_5196296	5196296
IV_1400988	IV	1400988	A_12_P102506	21.0079938496009	2.96440720388291	1	0.449303796234062	0.668190082382891	IV_1314462	1314462	IV_1425153	1425153
V_15928368	V	15928368	A_12_P102514	12.461488501094	3.13805069459805	1	0.284741813948898	0.531931372387784	V_15922484	15922484	V_15963182	15963182
X_2995671	X	2995671	A_12_P102516	3.66408941716862	2.98836025369598	1	0.0995360906609016	-0.31449972577427	X_2538424	2538424	X_3991931	3991931
IV_9995259	IV	9995259	A_12_P102519	3.04496406518486	3.02723452151629	1	0.078925106941842	-0.28004567653963	IV_8696159	8696159	IV_11570976	11570976
V_1113279	V	1113279	A_12_P102520	10.5900588750582	3.12853690432061	1	0.260374031939185	-0.50866143888766	V_691031	691031	V_1436415	1436415
IV_3358974	IV	3358974	A_12_P102526	26.919062793014	3.05597476123528	1	0.541412582325035	-0.735096386148823	IV_3166638	3166638	IV_3367227	3367227
II_14229519	II	14229519	A_12_P102528	4.36853031703605	2.73126538990502	1	0.110947185927632	0.332038258163215	II_14070545	14070545	II_15274701	15274701
II_13374590	II	13374590	A_12_P102536	3.03021850057724	2.97535234340869	1	0.0819468524044025	0.285361986598723	II_13163270	13163270	II_13578819	13578819
IV_4755912	IV	4755912	A_12_P102539	4.93339006656092	2.95246274289138	1	0.127412876793421	0.355825150805369	IV_4281922	4281922	IV_6109938	6109938
III_3326662	III	3326662	A_12_P102539	3.51108532659131	3.14229006830825	2	0.09185038393664	0.302113734487476	III_3303150	3303150	III_3501409	3501409
X_14301149	X	14301149	A_12_P102539	3.34547202813404	2.93153078700439	3	0.0456861536164557	-0.213069986898627	X_13868269	13868269	X_14623403	14623403
V_12903236	V	12903236	A_12_P102546	3.14599096425304	2.87536264034452	1	0.0855711752281013	-0.291604169613709	V_12298716	12298716	V_14156647	14156647
II_7659303	II	7659303	A_12_P102549	4.36914137194432	3.10455370903374	1	0.118070818045452	-0.342532092341958	II_6654199	6654199	II_9145624	9145624
IV_8747453	IV	8747453	A_12_P102550	8.45212407807524	3.0185934416804	1	0.213187518841733	-0.460230502568406	IV_8044494	8044494	IV_9987122	9987122
IV_1266572	IV	1266572	A_12_P102551	28.0462150441796	3.00547615357002	1	0.526051908925174	0.7230099628313	IV_1239040	1239040	IV_1310646	1310646
X_9642366	X	9642366	A_12_P102551	4.02213681236617	3.06257921021763	2	0.0643096525209801	0.252794757258883	X_8208528	8208528	X_13024411	13024411
IV_15117167	IV	15117167	A_12_P102552	3.13253943966367	2.96412157282096	1	0.0975957658155051	-0.311260964405814	IV_14946839	14946839	IV_15429132	15429132
I_1516275	I	1516275	A_12_P102559	3.72251511501075	2.87861938020101	1	0.0370002857310868	0.191748740625643	I_1508520	1508520	I_1549969	1549969
X_4656473	X	4656473	A_12_P102559	3.35066034066124	3.03469167714995	2	0.0942158750727003	-0.305979284264943	X_4165450	4165450	X_5949176	5949176
X_3843271	X	3843271	A_12_P102564	4.42078352800906	2.98326142793804	1	0.117211207024674	-0.341282917272463	X_3713398	3713398	X_3907685	3907685
X_4501238	X	4501238	A_12_P102570	3.15361423357578	3.01915244956731	1	0.0835317459334408	-0.288108293946526	X_3946591	3946591	X_5341098	5341098
V_5045041	V	5045041	A_12_P102572	3.50467986170987	3.14518903857593	1	0.0907180121061881	0.300245663700459	V_4959381	4959381	V_5521051	5521051
X_3618239	X	3618239	A_12_P102573	3.2366431342163	3.02571551793222	1	0.0869038005139493	-0.293866016631462	X_3154731	3154731	X_3991931	3991931
IV_15399516	IV	15399516	A_12_P102573	4.08658307475938	3.1095805424692	2	0.0825342264091757	0.286382861261306	IV_15393010	15393010	IV_15619530	15619530
X_5569019	X	5569019	A_12_P102575	6.32471406251588	3.01109435468845	1	0.167540419338814	0.407994501687947	X_4630882	4630882	X_5676445	5676445
V_5045041	V	5045041	A_12_P102585	3.29238571474206	3.05611894764201	1	0.0854809151717917	-0.291450337713136	V_4959381	4959381	V_5237566	5237566
V_10568558	V	10568558	A_12_P102599	14.8062658710452	3.05999168724404	1	0.337134062223426	0.578803699201588	V_10332855	10332855	V_11032432	11032432
I_12318658	I	12318658	A_12_P102599	4.17203284934624	3.12086236503767	2	0.0696966247331573	-0.26316968134908	I_12097737	12097737	I_12599304	12599304
II_11988183	II	11988183	A_12_P102603	9.8503640028422	3.00757420268533	1	0.241053476111642	-0.489425598547374	II_11918867	11918867	II_12049752	12049752
V_12609412	V	12609412	A_12_P102606	3.4629455045077	3.00413350106626	1	0.0930732932568051	-0.304118277373374	V_11004172	11004172	V_13954172	13954172
II_343260	II	343260	A_12_P102610	5.58337899735773	3.1102193051192	1	0.130125637463333	0.359593155145805	II_6368	6368	II_916957	916957
II_13261146	II	13261146	A_12_P102610	3.64551660002883	2.99112369006876	2	0.101301280498356	0.317276166023652	II_13194469	13194469	II_13738578	13738578
II_13261146	II	13261146	A_12_P102615	3.53039905510287	3.15663943520752	1	0.0935033335824774	0.304820049048753	II_13080794	13080794	II_13537030	13537030
III_2454777	III	2454777	A_12_P102616	12.832010193673	2.74301044751619	1	0.298610295663476	-0.544731349831724	III_2411406	2411406	III_2561122	2561122
I_2394565	I	2394565	A_12_P102616	5.39874627644193	2.60526564892625	2	0.00534728193199505	0.0728947956168356	I_2390778	2390778	I_2481437	2481437
I_2394565	I	2394565	A_12_P102616	4.91105449500426	2.7130857710132	3	0.00534728193199505	0.0728947956168356	I_2390778	2390778	I_2481437	2481437
I_2394565	I	2394565	A_12_P102616	4.46461836404848	2.73944381298808	4	0.00534728193199505	0.0728947956168356	I_2390778	2390778	I_2491566	2491566
I_2394565	I	2394565	A_12_P102616	4.05641817803767	2.74214770849356	5	0.00534728193199505	0.0728947956168356	I_2390778	2390778	I_2491566	2491566
I_2394565	I	2394565	A_12_P102616	3.68357678315281	2.73844260525968	6	0.00534728193199505	0.0728947956168356	I_2390778	2390778	I_2491566	2491566
I_2378604	I	2378604	A_12_P102616	3.36761918345559	2.70061888541141	7	0.00364404016830295	0.0602395544976676	I_2283880	2283880	I_2382076	2382076
I_2394565	I	2394565	A_12_P102616	10.9160830829924	2.85666516172447	8	0.00534728193199505	0.0728947956168356	I_2390778	2390778	I_2481437	2481437
I_2394565	I	2394565	A_12_P102616	10.4484095496392	2.72774162516689	9	0.00534728193199505	0.0728947956168356	I_2390778	2390778	I_2481437	2481437
I_2394565	I	2394565	A_12_P102616	9.99798314550334	2.79903174158571	10	0.00534728193199505	0.0728947956168356	I_2390778	2390778	I_2481437	2481437
I_2394565	I	2394565	A_12_P102616	9.56438320013223	2.85499149815945	11	0.00534728193199505	0.0728947956168356	I_2390778	2390778	I_2481437	2481437
I_2394565	I	2394565	A_12_P102616	9.14718321082528	2.79057085344874	12	0.00534728193199505	0.0728947956168356	I_2390778	2390778	I_2481437	2481437
I_2394565	I	2394565	A_12_P102616	8.74595221277292	2.90497274699208	13	0.00534728193199505	0.0728947956168356	I_2390778	2390778	I_2481437	2481437
I_2394565	I	2394565	A_12_P102616	8.36025609902324	2.76606209884061	14	0.00534728193199505	0.0728947956168356	I_2390778	2390778	I_2481437	2481437
I_2394565	I	2394565	A_12_P102616	7.98965888451378	2.86366756745032	15	0.00534728193199505	0.0728947956168356	I_2390778	2390778	I_2481437	2481437
I_2394565	I	2394565	A_12_P102616	7.63372390934131	3.04240396115947	16	0.00534728193199505	0.0728947956168356	I_2390778	2390778	I_2481437	2481437
I_2394565	I	2394565	A_12_P102616	7.29201497736074	2.94372432977844	17	0.00534728193199505	0.0728947956168356	I_2390778	2390778	I_2481437	2481437
I_2394565	I	2394565	A_12_P102616	6.96409742708975	2.98499271558637	18	0.00534728193199505	0.0728947956168356	I_2390778	2390778	I_2481437	2481437
I_2394565	I	2394565	A_12_P102616	6.64953913274067	2.82224500840978	19	0.00534728193199505	0.0728947956168356	I_2390778	2390778	I_2481437	2481437
I_2394565	I	2394565	A_12_P102616	6.34791143399437	2.9224183928352	20	0.00534728193199505	0.0728947956168356	I_2390778	2390778	I_2481437	2481437
I_2394565	I	2394565	A_12_P102616	6.05878999386799	2.86687084715367	21	0.00534728193199505	0.0728947956168356	I_2390778	2390778	I_2481437	2481437
I_2394565	I	2394565	A_12_P102616	5.78175558470227	2.85461228254222	22	0.00534728193199505	0.0728947956168356	I_2390778	2390778	I_2481437	2481437
I_2394565	I	2394565	A_12_P102616	5.51639480290376	2.89422269943703	23	0.00534728193199505	0.0728947956168356	I_2390778	2390778	I_2481437	2481437
I_2394565	I	2394565	A_12_P102616	5.26230071361891	2.9375535878734	24	0.00534728193199505	0.0728947956168356	I_2390778	2390778	I_2481437	2481437
I_2394565	I	2394565	A_12_P102616	5.01907342699221	3.04959417361933	25	0.00534728193199505	0.0728947956168356	I_2390778	2390778	I_2481437	2481437
I_2394565	I	2394565	A_12_P102616	4.78632060806874	2.92080175591641	26	0.00534728193199505	0.0728947956168356	I_2390778	2390778	I_2481437	2481437
I_2394565	I	2394565	A_12_P102616	4.56365792274593	3.03336072051512	27	0.00534728193199505	0.0728947956168356	I_2390778	2390778	I_2481437	2481437
I_2394565	I	2394565	A_12_P102616	4.35070942246194	2.95044867229627	28	0.00534728193199505	0.0728947956168356	I_2390778	2390778	I_2481437	2481437
I_2394565	I	2394565	A_12_P102616	4.14710787053253	3.00797843280238	29	0.00534728193199505	0.0728947956168356	I_2390778	2390778	I_2481437	2481437
I_2394565	I	2394565	A_12_P102616	3.95249501321908	3.046126297295	30	0.00534728193199505	0.0728947956168356	I_2390778	2390778	I_2481437	2481437
I_2394565	I	2394565	A_12_P102616	3.7665217987309	2.97309542466333	31	0.00534728193199505	0.0728947956168356	I_2390778	2390778	I_2481437	2481437
I_2394565	I	2394565	A_12_P102616	3.58884854744076	3.01707621902823	32	0.00534728193199505	0.0728947956168356	I_2390778	2390778	I_2481437	2481437
I_2394565	I	2394565	A_12_P102616	3.41914507662751	3.07252320570209	33	0.00534728193199505	0.0728947956168356	I_2390778	2390778	I_2481437	2481437
I_2394565	I	2394565	A_12_P102616	3.25709078305862	2.97165758251624	34	0.00534728193199505	0.0728947956168356	I_2390778	2390778	I_2481437	2481437
II_2907661	II	2907661	A_12_P102622	3.65034473134213	3.05087075503194	1	0.0957632298251285	-0.30944748786449	II_2702247	2702247	II_3026490	3026490
I_4997003	I	4997003	A_12_P102623	8.16389095610082	3.06890406445721	1	0.115213274434758	0.338361733424245	I_4775095	4775095	I_6651082	6651082
IV_4693652	IV	4693652	A_12_P102654	3.82411617060293	3.0283651541911	1	0.10058887072726	-0.316152229637774	IV_4368392	4368392	IV_6481596	6481596
X_582924	X	582924	A_12_P102659	3.22788496940498	3.0223012526047	1	0.0898937181768204	-0.298866436261192	X_21056	21056	X_2659761	2659761
IV_1713430	IV	1713430	A_12_P102667	15.4012333753044	3.1489333143484	1	0.361434638225248	-0.599288809526611	IV_1697436	1697436	IV_1791440	1791440
X_4758185	X	4758185	A_12_P102668	4.46227867634493	3.12742301302974	1	0.117560850289999	-0.341784719195439	X_4483054	4483054	X_5341098	5341098
IV_15746218	IV	15746218	A_12_P102668	3.60705506652261	2.97713529875739	2	0.0543137273597316	0.232314376635696	IV_15442610	15442610	IV_15983752	15983752
IV_4761504	IV	4761504	A_12_P102673	18.5205856703736	2.96702061109148	1	0.403189030596291	0.63297176124188	IV_4755912	4755912	IV_5023053	5023053
I_14821667	I	14821667	A_12_P102678	3.99151111396514	3.06161167345652	1	0.105321752428118	0.323504496194905	I_14663203	14663203	I_15058920	15058920
IV_9995259	IV	9995259	A_12_P102679	6.96578260877331	2.9541601454178	1	0.173647409757095	-0.415372465788929	IV_8986377	8986377	IV_11595915	11595915
III_12361892	III	12361892	A_12_P102681	28.0780027705029	3.08275674665638	1	0.53642059558624	-0.732401161570221	III_12319309	12319309	III_12393485	12393485
X_5576572	X	5576572	A_12_P102702	5.46748816933835	3.02482542878864	1	0.157963148526522	0.396053672024687	X_4891523	4891523	X_5949176	5949176
IV_14658591	IV	14658591	A_12_P102702	3.54695808715629	2.9018753976934	2	0.117517303056262	0.341607236068252	IV_13899412	13899412	IV_15393010	15393010
I_10575568	I	10575568	A_12_P102704	3.63036080913637	2.96834158887842	1	0.0878655844816621	-0.295487682895216	I_9523381	9523381	I_10826560	10826560
V_12609412	V	12609412	A_12_P102704	4.27091495925296	2.93362133606014	2	0.0881130918270621	0.295903567802439	V_11671299	11671299	V_12931140	12931140
III_12446786	III	12446786	A_12_P102704	3.84018427331098	3.01377196669512	3	0.0930326900743138	0.304051934405925	III_12373202	12373202	III_12540486	12540486
V_5167653	V	5167653	A_12_P102711	32.111416720403	3.0937378458561	1	0.569040278464823	0.751971680842399	V_5107543	5107543	V_5215297	5215297
II_12370973	II	12370973	A_12_P102720	69.5977331953007	3.03118175031883	1	0.848646585736943	-0.918318673351821	II_12354355	12354355	II_12420847	12420847
II_13261146	II	13261146	A_12_P102724	3.70301204098016	2.95673702710182	1	0.0978344379369957	0.311799818804589	II_13076591	13076591	II_13459444	13459444
V_16436223	V	16436223	A_12_P102728	41.5660257597939	3.09005279602163	1	0.666057810341081	-0.813553174358473	V_16434531	16434531	V_16470633	16470633
X_4322768	X	4322768	A_12_P102742	3.71311658149634	3.05566552847522	1	0.0994424584794472	0.314351768266509	X_3946591	3946591	X_5810100	5810100
II_4858788	II	4858788	A_12_P102746	3.11592243724318	3.08481042690629	1	0.0855269658889506	-0.291528832953292	II_4287737	4287737	II_5911690	5911690
X_3843271	X	3843271	A_12_P102752	4.28064971474996	3.16583765984291	1	0.121870041084966	-0.347909461191311	X_3713398	3713398	X_4322768	4322768
X_4758185	X	4758185	A_12_P102764	17.4698719632276	3.05667970812395	1	0.383879435082146	0.617628609289148	X_4630882	4630882	X_5341098	5341098
II_4328160	II	4328160	A_12_P102768	4.0965748579326	2.97574310624119	1	0.111087779585607	-0.332241918446544	II_4119401	4119401	II_5429933	5429933
IV_872114	IV	872114	A_12_P102774	8.74197254691096	3.04683236081744	1	0.21284608642487	-0.459899371377334	IV_784688	784688	IV_986168	986168
X_4322768	X	4322768	A_12_P102777	3.32722894975553	3.01425758551999	1	0.0895986954679365	-0.298387636573572	X_3453131	3453131	X_5526747	5526747
X_13298445	X	13298445	A_12_P102778	14.6664404622935	2.99885905313711	1	0.334418386151528	0.577595838344878	X_13173080	13173080	X_13374151	13374151
X_4862702	X	4862702	A_12_P102780	13.3592165229543	3.07940090276166	1	0.307038345319154	0.552365174991655	X_4674201	4674201	X_5390152	5390152
V_9985933	V	9985933	A_12_P102786	3.27267821577194	2.94700059981812	1	0.0878262181288634	0.295421481915431	V_8514009	8514009	V_11806498	11806498
X_4635054	X	4635054	A_12_P102792	4.41476853660391	2.97412328439611	1	0.115466446481293	0.338733290975914	X_4175841	4175841	X_5341098	5341098
IV_15683717	IV	15683717	A_12_P102793	4.41736213606446	3.02858812135053	1	0.118919953347786	0.343747729324332	IV_15520335	15520335	IV_16411900	16411900
X_5949176	X	5949176	A_12_P102793	5.04202613176961	2.89627064389214	2	0.0875307737449807	-0.294912279997123	X_5638607	5638607	X_6379919	6379919
II_14204646	II	14204646	A_12_P102793	3.27753954900665	3.016790223643	3	0.0622516164393909	-0.248706874308516	II_13744022	13744022	II_15274701	15274701
II_4134290	II	4134290	A_12_P102795	9.97257070289326	3.04280976185814	1	0.247187722252105	-0.495593864128005	II_3861010	3861010	II_4299016	4299016
I_2378604	I	2378604	A_12_P102807	3.00738174452573	2.89544921371279	1	0.00430302919652971	-0.0655918022365833	I_2250505	2250505	I_2394565	2394565
III_11997250	III	11997250	A_12_P102811	4.80440139811524	2.97265595068859	1	0.126157897216249	-0.354068427456908	III_11971503	11971503	III_12202569	12202569
II_14071163	II	14071163	A_12_P102822	2.97404272020067	2.96297682374991	1	0.0789774075571449	-0.280144059908591	II_13445806	13445806	II_15274701	15274701
V_4617905	V	4617905	A_12_P102830	3.31637591503833	3.00787875318747	1	0.0854947207582039	-0.291473872091352	V_4261110	4261110	V_4792309	4792309
I_1451409	I	1451409	A_12_P102832	4.20346390289273	2.96717485909519	1	0.0391747901956346	0.197302832892385	I_1345627	1345627	I_1688137	1688137
X_4167697	X	4167697	A_12_P102845	3.97686372504485	2.97362438791724	1	0.106107472963287	-0.324715460620576	X_3789476	3789476	X_5810100	5810100
V_1582251	V	1582251	A_12_P102851	3.07185870480051	2.93293093069285	1	0.0836431742468105	-0.288300392901475	V_8249	8249	V_1973596	1973596
IV_13813174	IV	13813174	A_12_P102853	8.52908300691167	3.13177582326575	1	0.212571581863087	0.459602712867613	IV_13526357	13526357	IV_14378834	14378834
III_12731659	III	12731659	A_12_P102860	5.20207018491143	3.10341906299494	1	0.139198465534022	-0.371918006402806	III_12589611	12589611	III_13105354	13105354
II_14465917	II	14465917	A_12_P102871	4.9135130500086	3.02466375934886	1	0.142607036730332	0.376319957066285	II_14018808	14018808	II_15274701	15274701
III_10408732	III	10408732	A_12_P102871	4.30874498963297	3.05745348322514	2	0.107015398556208	0.325994227044336	III_10275321	10275321	III_10529604	10529604
X_3088382	X	3088382	A_12_P102876	4.2440180178539	3.0154625123555	1	0.114344159741173	-0.337083096702316	X_2636716	2636716	X_3572913	3572913
II_13056136	II	13056136	A_12_P102878	3.98471281260607	3.16838222105621	1	0.107443287504557	-0.32675303144422	II_12698790	12698790	II_13190752	13190752
X_7628078	X	7628078	A_12_P102888	3.08222964572713	3.05439576797325	1	0.101219901888529	0.316952441218916	X_3843271	3843271	X_7982412	7982412
V_12609412	V	12609412	A_12_P102894	2.90028019607917	2.88518661684366	1	0.0903109574531546	0.299427003166437	V_11671299	11671299	V_13954172	13954172
IV_13871463	IV	13871463	A_12_P102896	11.872309994022	2.96326817486132	1	0.297632010636468	0.543735043226225	IV_13608743	13608743	IV_14237700	14237700
V_5045041	V	5045041	A_12_P102901	3.28224732235376	2.99589369901653	1	0.0852300040270959	0.29102227795466	V_4520286	4520286	V_5261629	5261629
V_20251656	V	20251656	A_12_P102903	14.6600943494623	2.91593031637395	1	0.331625226461339	0.57404384207391	V_20203413	20203413	V_20921615	20921615
II_13374590	II	13374590	A_12_P102906	3.09754172487167	2.8760932183981	1	0.0836870659164429	-0.288376025648008	II_13189581	13189581	II_13537030	13537030
III_2281167	III	2281167	A_12_P102910	21.0268390557872	3.1164868469495	1	0.450895498028498	-0.66937259974261	III_2253543	2253543	III_2319656	2319656
X_3843271	X	3843271	A_12_P102912	6.24646117931795	2.92432096762316	1	0.161405077424008	0.400487142304096	X_3713398	3713398	X_5341098	5341098
I_9554938	I	9554938	A_12_P102912	3.2937419623788	3.10737620741066	2	0.0748990705220962	0.272814968770922	I_9214560	9214560	I_10826560	10826560
II_693206	II	693206	A_12_P102912	3.55279550501134	3.05265656386716	3	0.0703896977435117	0.264474942559745	II_6368	6368	II_1501777	1501777
IV_12262083	IV	12262083	A_12_P102923	5.61077968993046	2.92443378614472	1	0.147373354496645	-0.382683260743491	IV_11846956	11846956	IV_12644720	12644720
X_3843271	X	3843271	A_12_P102926	3.52454138546552	2.94185875141659	1	0.0946457626568809	-0.306676549947937	X_3713398	3713398	X_5361887	5361887
III_4664	III	4664	A_12_P102932	6.66536053971711	3.06115110780119	1	0.172194328103446	0.414075001061281	III_4664	4664	III_148752	148752
X_3863779	X	3863779	A_12_P102937	3.06301810565174	3.02899448355452	1	0.0816668098828698	-0.28487397590471	X_3814926	3814926	X_4501238	4501238
IV_7016150	IV	7016150	A_12_P102939	3.59748887513084	3.16117321784513	1	0.109827826915048	0.330182176024392	IV_6578183	6578183	IV_7662541	7662541
IV_7172090	IV	7172090	A_12_P102941	5.09514159423598	3.08876230574193	1	0.133808062298122	-0.364645721430929	IV_4757132	4757132	IV_11595915	11595915
X_4635054	X	4635054	A_12_P102947	6.96629344094834	2.97568208552856	1	0.182360254935195	0.425638764498859	X_4171941	4171941	X_5714088	5714088
IV_4043339	IV	4043339	A_12_P102956	42.7899579706412	3.17861199301665	1	0.683419499997305	-0.824088141006934	IV_3988400	3988400	IV_4043433	4043433
X_5390152	X	5390152	A_12_P102956	4.13970941893378	3.08131235603082	2	0.0195921334174986	0.139531044762837	X_4630882	4630882	X_5810100	5810100
X_4656473	X	4656473	A_12_P102959	3.33930994825826	3.08355296462806	1	0.089120897846128	-0.297590976097467	X_4504557	4504557	X_5569019	5569019
V_11513193	V	11513193	A_12_P102966	5.96969959478076	3.04255813242558	1	0.151940698899668	-0.388568008229957	V_11004172	11004172	V_11671299	11671299
IV_1250791	IV	1250791	A_12_P102969	5.20349938657443	3.02934757451099	1	0.133124430695168	0.363713032657283	IV_1173221	1173221	IV_1425153	1425153
V_2284786	V	2284786	A_12_P102970	36.4022323701522	3.09175232931562	1	0.660969617734106	-0.810285846856453	V_2283377	2283377	V_2302069	2302069
V_13010814	V	13010814	A_12_P102971	3.03568260050679	3.01353364586527	1	0.0820882184940697	0.285608018778068	V_12298716	12298716	V_13855621	13855621
III_1452343	III	1452343	A_12_P102972	22.7351886177508	2.97421079523208	1	0.486670210482034	-0.695392263563657	III_1395240	1395240	III_1460260	1460260
X_15607625	X	15607625	A_12_P102983	5.06862564113526	3.10192421004524	1	0.135321884378948	-0.366702608860529	X_15521354	15521354	X_15930189	15930189
X_4862702	X	4862702	A_12_P102992	11.9664630699	3.11536330622228	1	0.280286806400452	0.527753726938337	X_4536045	4536045	X_4958735	4958735
IV_4818285	IV	4818285	A_12_P102997	4.17499319590066	3.11476634728153	1	0.110107785715593	-0.330779811836574	IV_4656772	4656772	IV_5646749	5646749
V_9985933	V	9985933	A_12_P103029	3.4199582198762	3.12566414417915	1	0.0915862649303338	0.30167905244728	V_9005254	9005254	V_11637718	11637718
X_3796301	X	3796301	A_12_P103029	3.24135803440097	2.92460682405881	2	0.056616204162779	-0.237192174000405	X_3713398	3713398	X_4025890	4025890
IV_13813174	IV	13813174	A_12_P103038	5.20359580454002	3.14068187488339	1	0.135871596947022	0.367446674500455	IV_13608743	13608743	IV_14237700	14237700
X_5291269	X	5291269	A_12_P103038	3.46358306533197	2.96475502144227	2	0.0940787210254101	0.305756489638516	X_4175841	4175841	X_6076783	6076783
V_13010814	V	13010814	A_12_P103041	3.58163497694635	2.99987378399038	1	0.0961007908632189	-0.309024891187608	V_12298716	12298716	V_13954172	13954172
X_5526747	X	5526747	A_12_P103061	3.63740950652402	3.06017747086002	1	0.0971085386053458	0.310640939155685	X_4175841	4175841	X_5949176	5949176
III_10465571	III	10465571	A_12_P103065	3.34808904376917	2.89452990551564	1	0.0923855204025845	0.302992540161904	III_9308961	9308961	III_10884949	10884949
IV_7641964	IV	7641964	A_12_P103071	21.413299721936	3.05750062230355	1	0.456386485152464	0.673408913562085	IV_7381956	7381956	IV_8127338	8127338
IV_4761504	IV	4761504	A_12_P103079	3.23596783501531	2.89031592236726	1	0.086886505171018	-0.293836772994214	IV_4331347	4331347	IV_6062184	6062184
X_7002637	X	7002637	A_12_P103080	9.34628021429093	3.00378171587348	1	0.236919739016524	0.485210962123536	X_6912564	6912564	X_7838301	7838301
IV_16167824	IV	16167824	A_12_P103080	3.24002918168222	2.97423303961771	2	0.0340906067424163	-0.184054884234847	IV_15573322	15573322	IV_16497251	16497251
X_1640741	X	1640741	A_12_P103091	34.7194688669871	3.01349592216517	1	0.619257186984888	0.784434724945405	X_1579152	1579152	X_1962263	1962263
X_5361887	X	5361887	A_12_P103091	4.93192705822579	3.02403378544934	2	0.116671323731419	0.340489203399833	X_4527431	4527431	X_5949176	5949176
IV_4043339	IV	4043339	A_12_P103096	17.411938557031	3.09487356178918	1	0.381020580816226	-0.615324487536484	IV_3958558	3958558	IV_4295474	4295474
II_3419553	II	3419553	A_12_P103099	3.10971991718867	2.93429946916547	1	0.092492914811919	0.303046096646509	II_3038907	3038907	II_3598302	3598302
I_4259878	I	4259878	A_12_P103105	5.38403803060101	2.9826697755958	1	0.0789997071226278	-0.280183606977125	I_3894133	3894133	I_5289115	5289115
V_13010814	V	13010814	A_12_P103105	4.12651618648377	3.06949565690028	2	0.111144848231371	-0.332333904422432	V_12486434	12486434	V_13622608	13622608
X_16056012	X	16056012	A_12_P103109	4.17097153698256	3.06832275879847	1	0.114777796258175	-0.337708050677208	X_15592974	15592974	X_17709225	17709225
V_10022825	V	10022825	A_12_P103119	3.51378039016309	3.05837496179527	1	0.0947386910706353	0.306827068959523	V_9905233	9905233	V_12112105	12112105
X_3843271	X	3843271	A_12_P103126	4.00580500241511	2.99867296659562	1	0.106835737525255	-0.325827891144601	X_3789476	3789476	X_3940409	3940409
IV_4761504	IV	4761504	A_12_P103130	3.0478707248825	2.98041257445024	1	0.0903270322147189	0.299506405883016	IV_3831026	3831026	IV_6109938	6109938
V_12414380	V	12414380	A_12_P103135	3.29340530356269	2.94195410587698	1	0.0897539163207645	-0.298640006628785	V_11806498	11806498	V_13954172	13954172
IV_16497251	IV	16497251	A_12_P103138	9.88316040449158	3.08903500523914	1	0.248267885758857	0.496601214779489	IV_16429135	16429135	IV_17490756	17490756
III_5479398	III	5479398	A_12_P103146	3.82032737693361	2.95510010382161	1	0.103550026715131	-0.320778379392184	III_5037341	5037341	III_8009505	8009505
IV_6766024	IV	6766024	A_12_P103146	3.1310779599227	2.9282941705106	2	0.0909618031050143	-0.300648825530773	IV_5121450	5121450	IV_9987122	9987122
X_3843271	X	3843271	A_12_P103155	3.94138957264688	3.06484875690263	1	0.105213985127826	-0.32334542203489	X_3713398	3713398	X_4505845	4505845
V_3685467	V	3685467	A_12_P103161	7.50753562387982	2.99989145980937	1	0.194800604568366	-0.439972094039321	V_3429651	3429651	V_3897200	3897200
X_785359	X	785359	A_12_P103189	7.99941366318049	3.00298623503107	1	0.206406944542892	0.452889376844914	X_579097	579097	X_1142327	1142327
IV_2851044	IV	2851044	A_12_P103191	14.0887328837969	3.04859737072741	1	0.33783340511459	-0.579380358647471	IV_2782050	2782050	IV_2930684	2930684
IV_4761504	IV	4761504	A_12_P103194	3.21588361231086	3.00620411903031	1	0.0863719658852829	0.292965434776963	IV_4656772	4656772	IV_6488811	6488811
II_1727040	II	1727040	A_12_P103203	14.7218474923627	3.01507200444882	1	0.304735808476261	0.550221838139817	II_1709378	1709378	II_1857282	1857282
IV_15712992	IV	15712992	A_12_P103225	4.77584099055535	2.96824039910893	1	0.127339063417383	-0.355722066794702	IV_15442610	15442610	IV_16205584	16205584
X_4322768	X	4322768	A_12_P103226	5.17673814203341	3.08889888871629	1	0.13626053780398	-0.367964847963588	X_3946591	3946591	X_5526747	5526747
II_8102088	II	8102088	A_12_P103226	3.16423101075295	3.05667407969785	2	0.0750139747864901	0.273018685796725	II_7399295	7399295	II_9430890	9430890
V_2586597	V	2586597	A_12_P103230	3.28731090729707	2.94765587656239	1	0.0895626274054161	-0.264264612370066	V_2486879	2486879	V_2615895	2615895
II_4797215	II	4797215	A_12_P103232	3.1804534281485	2.99631685231921	1	0.0943023695559593	0.306040613053058	II_4287737	4287737	II_5465868	5465868
X_4656473	X	4656473	A_12_P103239	3.87074745866322	3.0825998316596	1	0.102525864318669	-0.319188106861688	X_3991931	3991931	X_5676445	5676445
X_14346521	X	14346521	A_12_P103241	5.06663948992709	2.94774913081432	1	0.136050082889096	-0.367687941045696	X_13708374	13708374	X_14630642	14630642
X_5810100	X	5810100	A_12_P103248	5.32740045825811	3.05954365297549	1	0.14156264508176	-0.375047959844004	X_4927721	4927721	X_5993800	5993800
IV_7698565	IV	7698565	A_12_P103248	4.72353523784459	3.0328822393936	2	0.0965788930274949	0.309780149206831	IV_6451359	6451359	IV_8963101	8963101
III_5503798	III	5503798	A_12_P103248	3.69293030086781	2.92741161193927	3	0.105457477026789	0.323706307246954	III_3303150	3303150	III_6815334	6815334
X_8208528	X	8208528	A_12_P103250	4.07014454716342	3.17153892940207	1	0.113782966965414	0.336227427952528	X_6403674	6403674	X_10449274	10449274
IV_7172090	IV	7172090	A_12_P103264	3.9266704158384	3.08439153981167	1	0.114306981017596	-0.336933311636113	IV_6578183	6578183	IV_7698565	7698565
V_19397806	V	19397806	A_12_P103268	44.7206486698444	3.07158768263045	1	0.699513207661658	-0.836221578250817	V_19393734	19393734	V_19397894	19397894
IV_8736539	IV	8736539	A_12_P103275	11.7589643262731	3.06268249980728	1	0.276208069558386	-0.523899715487809	IV_8339874	8339874	IV_8778092	8778092
I_11150607	I	11150607	A_12_P103279	11.3509048683151	3.06195085497969	1	0.217843532904538	-0.465267071467486	I_11004221	11004221	I_11543723	11543723
IV_15117167	IV	15117167	A_12_P103279	7.77827071087151	3.13848157822861	2	0.177226500670998	-0.419656846234285	IV_15084637	15084637	IV_15331751	15331751
III_10011643	III	10011643	A_12_P103279	3.80318901614692	3.05009920449695	3	0.0464938178450707	-0.214945118335727	III_9692506	9692506	III_10736515	10736515
V_4310237	V	4310237	A_12_P103279	3.45386976978629	3.02817166074571	4	0.0347098377289678	0.185718972813086	V_4079351	4079351	V_4543432	4543432
IV_3533561	IV	3533561	A_12_P103282	5.97590947441464	2.98063547985306	1	0.158874999136283	0.3973358595763	IV_3410687	3410687	IV_3588635	3588635
X_7628078	X	7628078	A_12_P103284	3.41889099766559	3.00707724227787	1	0.111332563662767	0.332408599043307	X_6553273	6553273	X_8465070	8465070
IV_16167824	IV	16167824	A_12_P103284	4.23724495053692	3.01641300897858	2	0.0862306274419827	-0.292544486975421	IV_15619530	15619530	IV_16382208	16382208
V_13768624	V	13768624	A_12_P103311	2.91170439338713	2.90080320404132	1	0.0764950930458458	-0.275706350727946	V_11600826	11600826	V_15254082	15254082
II_3124630	II	3124630	A_12_P103329	34.6968075631106	3.06147856970918	1	0.595791948833868	-0.769444494202676	II_3116384	3116384	II_3199009	3199009
II_4905764	II	4905764	A_12_P103331	3.86972871381407	2.98948434712438	1	0.104177948111157	-0.321749500217688	II_4740943	4740943	II_5839860	5839860
X_13762651	X	13762651	A_12_P103347	3.47893501767884	3.00274197368329	1	0.112463617715938	0.334102285216242	X_13629259	13629259	X_14477626	14477626
X_4402562	X	4402562	A_12_P103350	9.54310118368905	3.09244321880765	1	0.234526963948516	0.482754545909863	X_4171941	4171941	X_4501238	4501238
X_14623403	X	14623403	A_12_P103350	3.8982189013243	2.98574218901763	2	0.0322237618490336	-0.178944395498076	X_14010288	14010288	X_15082605	15082605
X_8465070	X	8465070	A_12_P103350	3.45836996967046	3.14024327769676	3	0.104523669585219	0.322282931622977	X_7798884	7798884	X_9591109	9591109
IV_3838447	IV	3838447	A_12_P103350	3.18794212384648	3.15804424021651	4	0.0488000812409475	-0.220756308710972	IV_3688979	3688979	IV_3951830	3951830
IV_15621314	IV	15621314	A_12_P103350	3.49482347357463	2.94250135657827	5	0.0773022418416604	0.277157111076037	IV_15442610	15442610	IV_16053550	16053550
X_5291269	X	5291269	A_12_P103356	3.27929640554898	3.03508435745484	1	0.0867052674330807	0.293530153963273	X_4504557	4504557	X_5576572	5576572
X_6597806	X	6597806	A_12_P103367	3.73920680091017	3.06633880764595	1	0.104353935832857	0.322001553329714	X_6300921	6300921	X_7044171	7044171
V_15936590	V	15936590	A_12_P103370	10.4040693940479	3.11600253609265	1	0.243720983820805	-0.493649471670807	V_15935286	15935286	V_16099133	16099133
X_2757493	X	2757493	A_12_P103370	3.96236049039282	3.10455314980511	2	0.0785502614088027	-0.279385458833293	X_2555408	2555408	X_3104255	3104255
II_5465868	II	5465868	A_12_P103377	50.2452632820884	3.04252199354637	1	0.751906057654451	-0.864150459216256	II_5463446	5463446	II_5762423	5762423
III_1580776	III	1580776	A_12_P103380	6.06286624025485	2.93147402352404	1	0.160735048800005	-0.399655021916905	III_1249933	1249933	III_1759358	1759358
X_6597806	X	6597806	A_12_P103390	2.85917175657872	2.77176392288467	1	0.0843902542755759	0.289523533983167	X_5242819	5242819	X_7982412	7982412
I_1516275	I	1516275	A_12_P103395	3.41593511632318	2.98988218987816	1	0.0341014763757298	0.184084224423341	I_1345627	1345627	I_1688137	1688137
X_3843271	X	3843271	A_12_P103401	3.29573276297259	2.9827695950902	1	0.0887903796494528	-0.297038633158659	X_3713398	3713398	X_4505845	4505845
IV_8736539	IV	8736539	A_12_P103403	47.5947524520613	3.08777820461247	1	0.715821849902654	-0.843397786153977	IV_8696159	8696159	IV_8747453	8747453
II_13573967	II	13573967	A_12_P103410	3.40006884560573	2.93380979057766	1	0.0891998491133159	0.298897677738255	II_13225059	13225059	II_13744022	13744022
I_11902882	I	11902882	A_12_P103422	3.7157044546965	2.99651315150186	1	0.0833438827867204	-0.287716437562345	I_11588010	11588010	I_12012449	12012449
V_1977814	V	1977814	A_12_P103423	58.809972960608	3.23120452480858	1	0.814009579847124	-0.899383134565668	V_1973596	1973596	V_2021759	2021759
X_5291269	X	5291269	A_12_P103434	9.17014636774956	3.12220961356264	1	0.223205161075791	0.470957912165503	X_4483054	4483054	X_5676445	5676445
II_14243104	II	14243104	A_12_P103474	3.37452772101721	3.03345839648303	1	0.0875111014262118	0.294891025873139	II_13982623	13982623	II_15274701	15274701
III_9210994	III	9210994	A_12_P103478	17.287819086887	3.05332649503611	1	0.430368279765056	-0.653694135251157	III_9143646	9143646	III_9692506	9692506
V_5045041	V	5045041	A_12_P103479	3.65524106783699	2.98710972634614	1	0.0944127465370908	-0.306298801300898	V_4964433	4964433	V_5602246	5602246
X_5341098	X	5341098	A_12_P103481	4.67834648369798	3.02764655908515	1	0.121904263150849	0.348048228945232	X_4674201	4674201	X_5676445	5676445
IV_10776966	IV	10776966	A_12_P103484	4.39124096604468	2.91707105141666	1	0.118029061338894	-0.342406484941462	IV_7124538	7124538	IV_11595915	11595915
I_1600696	I	1600696	A_12_P103491	3.62171012879291	3.03776966134227	1	0.0360499820844249	0.189270316313343	I_1282314	1282314	I_1700575	1700575
X_4635054	X	4635054	A_12_P103492	3.15723919675304	3.03589279007846	1	0.0840658915432452	-0.289027983496808	X_3934740	3934740	X_5576572	5576572
X_1496249	X	1496249	A_12_P103498	4.29743463453623	3.05726711627147	1	0.115695646876328	0.339069316362435	X_1081925	1081925	X_2028158	2028158
V_16629757	V	16629757	A_12_P103508	3.52423080812834	3.06023631858938	1	0.0945541773411978	-0.306521994611823	V_16597105	16597105	V_17263584	17263584
IV_12963367	IV	12963367	A_12_P103513	26.7980237522535	3.05757442236386	1	0.528534537896876	0.724714027259256	IV_12868784	12868784	IV_13011435	13011435
IV_15712992	IV	15712992	A_12_P103513	3.15745068446626	2.9367162473591	2	0.00489674404935307	-0.0697563396184691	IV_15625988	15625988	IV_15983752	15983752
X_6468293	X	6468293	A_12_P103535	4.25594609101269	2.93873713715249	1	0.115857182464232	0.339305940029496	X_5242819	5242819	X_7002637	7002637
II_13471245	II	13471245	A_12_P103535	3.65797491394692	2.93141792582342	2	0.104502350974374	0.322250063590326	II_13189581	13189581	II_13663523	13663523
IV_4332817	IV	4332817	A_12_P103536	5.49121835644136	2.98826343544196	1	0.140707247027362	-0.373928196032602	IV_3958558	3958558	IV_5023053	5023053
IV_4391814	IV	4391814	A_12_P103540	3.61442096919301	2.94083961361865	1	0.0951110342573231	-0.307429425481575	IV_4043339	4043339	IV_7172090	7172090
V_5699019	V	5699019	A_12_P103542	5.62657594780091	3.07057226467107	1	0.139380189656276	-0.372160697400846	V_5167653	5167653	V_5856208	5856208
X_4175841	X	4175841	A_12_P103549	3.08280386680133	3.0478168348668	1	0.0836307622173582	0.288279001283082	X_3907685	3907685	X_4566632	4566632
I_1516275	I	1516275	A_12_P103573	4.37783421430137	3.08048803401057	1	0.0431108888043948	0.206977658550285	I_1508520	1508520	I_1549969	1549969
V_5281983	V	5281983	A_12_P103576	3.3279092146542	2.97557515357662	1	0.0883949002698162	-0.296376378108687	V_4538809	4538809	V_7626077	7626077
I_11796358	I	11796358	A_12_P103576	3.00131310733971	2.91009433496096	2	0.0571564265432562	0.238321111449408	I_11541403	11541403	I_12597637	12597637
II_3124630	II	3124630	A_12_P103581	25.8722042671533	3.09998413814198	1	0.498998345690972	-0.704144880176607	II_3102017	3102017	II_3199009	3199009
X_5576572	X	5576572	A_12_P103584	6.27724257691558	3.061335898494	1	0.161446475321062	0.400538498379148	X_4674201	4674201	X_5676445	5676445
V_18193756	V	18193756	A_12_P103585	48.552867755869	3.07609747915616	1	0.692992471739559	-0.829417948039335	V_18189568	18189568	V_18326576	18326576
IV_14378834	IV	14378834	A_12_P103607	11.3067433911927	3.02095454161007	1	0.269973020216137	-0.517952774577726	IV_14337329	14337329	IV_14907610	14907610
X_4175841	X	4175841	A_12_P103607	3.76129872693497	3.05920776846682	2	0.0939547304695572	0.305554938129024	X_3713398	3713398	X_5676445	5676445
IV_15398099	IV	15398099	A_12_P103612	3.90251695283201	3.04924283257072	1	0.105011709853396	0.323034454583452	IV_14899430	14899430	IV_15636170	15636170
X_2564766	X	2564766	A_12_P103614	3.03257122906056	3.01973340128964	1	0.0902444796488145	-0.299369510683868	X_2231943	2231943	X_3940409	3940409
V_10022825	V	10022825	A_12_P103614	3.18800880365431	3.11182024190268	2	0.0828348628966712	-0.286816296573508	V_7647965	7647965	V_10815911	10815911
II_1732850	II	1732850	A_12_P103623	49.7522554312599	3.13076223006305	1	0.609137043007588	-0.77791757606111	II_1727040	1727040	II_1856961	1856961
II_1860296	II	1860296	A_12_P103623	5.89254510664858	2.76790118917379	2	0.567103792806624	-0.750597916376888	II_1619984	1619984	II_2126849	2126849
IV_3719266	IV	3719266	A_12_P103633	10.2521695177413	3.06096428089149	1	0.255679566094693	-0.504055074876935	IV_3552328	3552328	IV_3838447	3838447
X_5638607	X	5638607	A_12_P103636	4.73712337606951	2.90830968159409	1	0.127872586320611	0.356437374433064	X_4630882	4630882	X_5949176	5949176
II_10431058	II	10431058	A_12_P103643	3.4135821256545	2.89325019244439	1	0.0930622353307255	0.304100210873281	II_9835892	9835892	II_12460865	12460865
II_13446733	II	13446733	A_12_P103649	3.1933979501396	3.11080640585606	1	0.0854041711448148	0.29131947753791	II_13212923	13212923	II_13578819	13578819
V_5281983	V	5281983	A_12_P103656	18.3053782517856	3.15296567443991	1	0.399267174561471	0.629860358761199	V_5261629	5261629	V_5521051	5521051
II_13446733	II	13446733	A_12_P103656	3.21589378721265	3.10382071020418	2	0.0559695834451157	0.235824276280125	II_13163270	13163270	II_13672258	13672258
IV_8179349	IV	8179349	A_12_P103664	3.4257196614433	3.06895051676146	1	0.0908662124897885	0.300490809970364	IV_4727677	4727677	IV_9672074	9672074
II_5087635	II	5087635	A_12_P103668	3.33640335424603	3.06364046118029	1	0.0901837835689077	0.299360301245098	II_4532532	4532532	II_7337528	7337528
III_3326662	III	3326662	A_12_P103684	3.47989052361379	2.96542497933543	1	0.0953004237908101	-0.307722951243613	III_3127577	3127577	III_3678175	3678175
X_3843271	X	3843271	A_12_P103686	4.28855426002206	2.9573559811141	1	0.113918682014646	-0.336455364523202	X_3713398	3713398	X_3907685	3907685
V_12609412	V	12609412	A_12_P103687	3.81370886063126	2.99379276904621	1	0.104218297461885	-0.321778736510935	V_12298716	12298716	V_13855621	13855621
V_1422457	V	1422457	A_12_P103707	3.15128793365356	3.0818291081541	1	0.0859848129206808	0.2923081044613	V_8249	8249	V_1776406	1776406
II_3400599	II	3400599	A_12_P103719	17.6572459774294	3.04326712859106	1	0.465818677789107	0.679795339904489	II_3373865	3373865	II_3521022	3521022
X_1143869	X	1143869	A_12_P103719	7.9645682694047	2.94806711058039	2	0.117615558226929	-0.341587618943668	X_21056	21056	X_1594701	1594701
X_4455978	X	4455978	A_12_P103720	3.77708646963091	2.93302152881867	1	0.10017831458794	-0.315512697517761	X_3789476	3789476	X_5361887	5361887
II_14608351	II	14608351	A_12_P103725	11.3782436291764	2.85995965369061	1	0.273813191904051	-0.52162351975106	II_14381332	14381332	II_15274701	15274701
I_3894133	I	3894133	A_12_P103728	3.93302218620573	3.02465491050599	1	0.0453128246108567	-0.212197639695991	I_3667385	3667385	I_4650804	4650804
II_4858788	II	4858788	A_12_P103740	3.08831040153915	3.04276256091465	1	0.0848024562673904	-0.290291418209072	II_4515657	4515657	II_5762423	5762423
X_12236381	X	12236381	A_12_P103741	3.7784797431695	3.12105976423088	1	0.102181465047117	0.318651556286094	X_10545442	10545442	X_12932361	12932361
V_11833225	V	11833225	A_12_P103746	4.72329698976627	3.190309207055	1	0.124170598665616	0.351268631540303	V_11648710	11648710	V_13228106	13228106
X_5638607	X	5638607	A_12_P103756	6.21431813288045	3.21879936242695	1	0.160647033618859	0.39954558553043	X_3946591	3946591	X_5922452	5922452
X_5569019	X	5569019	A_12_P103766	3.22969006877822	3.06081193079015	1	0.0870930688062661	0.294185848838011	X_3713398	3713398	X_5810100	5810100
X_4322768	X	4322768	A_12_P103773	4.83975953061893	2.91631935122998	1	0.127560873085448	-0.356031744993899	X_3934740	3934740	X_5291269	5291269
II_13284452	II	13284452	A_12_P103777	4.43701248268046	3.14868438706667	1	0.116011649365147	0.339532054967233	II_13194469	13194469	II_13578819	13578819
I_1623032	I	1623032	A_12_P103785	3.70184212134324	3.06054664825327	1	0.0386749337049705	-0.196002808177853	I_1439691	1439691	I_1688137	1688137
V_7086818	V	7086818	A_12_P103786	15.2036450504697	3.06554922097608	1	0.331010663245226	0.575324871996266	V_5884181	5884181	V_7093878	7093878
X_12565734	X	12565734	A_12_P103788	3.26509232211794	3.05269741019884	1	0.101632530737936	-0.317649746500846	X_11570896	11570896	X_13024411	13024411
V_5019415	V	5019415	A_12_P103792	3.1063492848613	2.93859991888132	1	0.0876594663139352	0.295057721489229	V_4165560	4165560	V_5269261	5269261
III_10736515	III	10736515	A_12_P103798	11.1792037621774	3.13148605547273	1	0.275709492878147	-0.523426662399194	III_10418745	10418745	III_10927990	10927990
V_1913716	V	1913716	A_12_P103818	3.47863588665754	3.01674829567029	1	0.0947479362147442	-0.306842039565702	V_1800608	1800608	V_2064625	2064625
X_4758185	X	4758185	A_12_P103818	4.10495816963909	2.95971070231918	2	0.0884115094951899	-0.296404221065862	X_4536045	4536045	X_5526747	5526747
IV_15636170	IV	15636170	A_12_P103818	3.51843341020651	2.84743288549441	3	0.0530698196560569	0.229643304290349	IV_15325632	15325632	IV_16416169	16416169
X_3843271	X	3843271	A_12_P103819	3.05852142449757	3.02285045318829	1	0.082678857808195	-0.28663367735106	X_3184463	3184463	X_4402562	4402562
II_2133052	II	2133052	A_12_P103823	3.98397836126088	3.16508894731422	1	0.0884571783051333	0.296480764722408	II_1988126	1988126	II_2304259	2304259
V_1436415	V	1436415	A_12_P103825	3.48688433388209	3.03965419539295	1	0.0949614467067841	0.307187572833923	V_708621	708621	V_1737453	1737453
II_4120191	II	4120191	A_12_P103827	24.1052389198515	3.06903427458697	1	0.497088430626345	-0.702781592194515	II_4119401	4119401	II_4215249	4215249
V_18936661	V	18936661	A_12_P103835	3.05207850554243	3.02092021203266	1	0.0800224504525139	-0.2819914264665	V_18856911	18856911	V_19159130	19159130
V_11619117	V	11619117	A_12_P103840	4.22521992953811	3.01983488572253	1	0.109854489867793	0.33039250640163	V_10119315	10119315	V_12311036	12311036
I_12098639	I	12098639	A_12_P103861	6.4998915900416	2.96790618248977	1	0.131355299993409	-0.361288203559411	I_12097737	12097737	I_12258273	12258273
II_13446733	II	13446733	A_12_P103864	3.10471371088512	3.02222794820722	1	0.0831374854063547	0.287427570249703	II_13374406	13374406	II_13842684	13842684
V_1038256	V	1038256	A_12_P103870	3.67604841243876	3.0111179999669	1	0.109236911925855	0.32935242133141	V_8249	8249	V_1977814	1977814
II_14030884	II	14030884	A_12_P103904	7.83587158248262	3.02687415276685	1	0.193203276622423	-0.438164537217599	II_13882420	13882420	II_14189728	14189728
IV_16053550	IV	16053550	A_12_P103904	6.733882354309	3.08155582615198	2	0.12608024513083	-0.353959443459676	IV_15954820	15954820	IV_16207052	16207052
III_1563588	III	1563588	A_12_P103904	3.98099455973595	3.07687647788447	3	0.0624992407566065	0.249211082760611	III_1519760	1519760	III_1861030	1861030
X_5526747	X	5526747	A_12_P103906	3.0844547722492	2.95783311472065	1	0.082997482032614	0.287185454524199	X_3907685	3907685	X_6076783	6076783
II_6986683	II	6986683	A_12_P103909	9.14358841356879	3.12729764385031	1	0.231549129692949	-0.479679941063207	II_6708561	6708561	II_7399295	7399295
IV_10327996	IV	10327996	A_12_P103931	13.4492315940506	3.15382853967104	1	0.301175567150794	-0.547066157968001	IV_9987122	9987122	IV_11565289	11565289
IV_16488050	IV	16488050	A_12_P103931	3.44288786581494	2.96928856036423	2	0.0894769160042608	-0.298184788520245	IV_15573322	15573322	IV_17490756	17490756
X_4656473	X	4656473	A_12_P103939	3.2540659525219	3.09698608220401	1	0.0872240017223812	0.29440100386814	X_4171941	4171941	X_5676445	5676445
I_1688137	I	1688137	A_12_P103957	3.29961020623592	3.08876623606444	1	0.0271953663095284	0.164348300318643	I_1282314	1282314	I_1868286	1868286
II_14281777	II	14281777	A_12_P103958	3.51747869948815	3.06865462205518	1	0.0946867933465677	-0.306730651797312	II_13738578	13738578	II_15274701	15274701
V_3897200	V	3897200	A_12_P103959	24.0615341975081	3.03364836216716	1	0.49613684297418	0.702151326617843	V_3881987	3881987	V_3899348	3899348
V_5045041	V	5045041	A_12_P103960	3.23884723110674	2.97296406269996	1	0.0841550788240562	0.289181260801504	V_4520286	4520286	V_5602686	5602686
V_18726513	V	18726513	A_12_P103973	11.7561998029057	3.01877939161857	1	0.286350744752752	-0.533421407769669	V_18692221	18692221	V_18897872	18897872
IV_15399516	IV	15399516	A_12_P103976	3.09379274458831	2.99637606161941	1	0.0844852777061332	0.289748034951569	IV_14781733	14781733	IV_16411900	16411900
II_2879287	II	2879287	A_12_P103981	27.8003892151247	3.1352629401497	1	0.5230523172578	0.720945684529939	II_2877424	2877424	II_2893454	2893454
V_4571894	V	4571894	A_12_P103985	21.512381904401	3.23118579285357	1	0.432871746358159	-0.655857669425757	V_4538809	4538809	V_4617905	4617905
III_10595502	III	10595502	A_12_P103995	18.9733239457221	2.98216082614544	1	0.42195994262348	-0.647538498088223	III_10498067	10498067	III_10612592	10612592
II_8864770	II	8864770	A_12_P103996	31.4674900669828	2.93032124086557	1	0.596881168288296	0.770147517477281	II_8074076	8074076	II_9145624	9145624
I_12884357	I	12884357	A_12_P103997	47.4686948925471	3.24886023036966	1	0.706665196892807	-0.837986134546523	I_12883880	12883880	I_12932809	12932809
X_5576572	X	5576572	A_12_P103999	5.68688695393452	2.97379184051752	1	0.147482338873415	0.382824734041191	X_4674201	4674201	X_5676445	5676445
II_4678773	II	4678773	A_12_P104002	8.11041800680727	2.98381239366208	1	0.21544697101517	-0.46263328536993	II_4317270	4317270	II_4996280	4996280
II_14212376	II	14212376	A_12_P104018	5.22775267455286	2.96972211169921	1	0.131809892207734	-0.36187564689652	II_13747136	13747136	II_14255058	14255058
II_3419553	II	3419553	A_12_P104028	16.939456154759	3.0579982264552	1	0.371052358067477	0.607222113759143	II_3408460	3408460	II_3521022	3521022
II_2513769	II	2513769	A_12_P104028	5.22710013104022	3.06054182579857	2	0.00212777933346905	-0.0459825735851108	II_2418128	2418128	II_2522027	2522027
X_12840430	X	12840430	A_12_P104029	5.69397377879564	3.11890374242019	1	0.148854153516034	-0.384601045073046	X_11382849	11382849	X_13018666	13018666
V_17337910	V	17337910	A_12_P104030	3.28774144108654	2.77331317297236	1	0.0960308542329059	0.308810578349792	V_16620392	16620392	V_17774180	17774180
V_5045041	V	5045041	A_12_P104036	2.97211973652122	2.96441725921736	1	0.0775190704113855	0.277545544168959	V_4751303	4751303	V_5269261	5269261
V_19892946	V	19892946	A_12_P104053	3.43469485116593	3.09991179682689	1	0.09085069626873	0.300459135094884	V_19687845	19687845	V_20038134	20038134
X_2995671	X	2995671	A_12_P104054	3.30378072302781	2.94559144146212	1	0.0902097998528936	-0.299403477970972	X_2518073	2518073	X_3480739	3480739
I_11868440	I	11868440	A_12_P104061	50.8283825337466	3.0020795731224	1	0.599119242305304	0.771590044490087	I_11858299	11858299	I_11902882	11902882
I_11858851	I	11858851	A_12_P104061	5.61840831194427	2.93821305738033	2	0.600233007159599	0.772306905834788	I_11796358	11796358	I_11921650	11921650
V_5019415	V	5019415	A_12_P104063	8.71727001354179	3.05985480940608	1	0.211701414615252	0.458642560128966	V_4959381	4959381	V_5107998	5107998
IV_4755912	IV	4755912	A_12_P104069	9.43219598415826	3.03254561583179	1	0.228752884377863	0.476774775960137	IV_4368392	4368392	IV_4818285	4818285
X_6468293	X	6468293	A_12_P104069	3.4916125837016	3.04560508039393	2	0.0902701122724159	0.299503548755676	X_5922452	5922452	X_8102133	8102133
IV_15403721	IV	15403721	A_12_P104069	4.09107333023109	2.98450429770776	3	0.049922577861231	-0.222729879863741	IV_15393010	15393010	IV_16053550	16053550
IV_4761504	IV	4761504	A_12_P104077	4.18148680617669	3.0858924682233	1	0.110774205745652	0.331779313140157	IV_4727677	4727677	IV_6475869	6475869
V_5030874	V	5030874	A_12_P104081	3.15752473402586	3.12380914954821	1	0.0817105418239106	0.284944532314468	V_4563217	4563217	V_5237566	5237566
V_12279420	V	12279420	A_12_P104087	11.3872629393744	3.15490713312679	1	0.272840683213365	-0.520696364567353	V_11894224	11894224	V_12442176	12442176
X_5176675	X	5176675	A_12_P104087	3.51634679972941	3.02127037793422	2	0.0351342425538307	0.186850936510567	X_4284268	4284268	X_5810100	5810100
V_13010814	V	13010814	A_12_P104088	2.98016329962594	2.95741455530398	1	0.08065079261525	-0.28309637038621	V_12298716	12298716	V_13622608	13622608
IV_7705207	IV	7705207	A_12_P104095	3.08995292958071	2.9152012776914	1	0.0962490985675237	-0.309097694277179	IV_6945644	6945644	IV_9672074	9672074
X_5526747	X	5526747	A_12_P104096	10.5744615030525	2.95845758097155	1	0.256206111462338	0.504573832328581	X_4639456	4639456	X_5922452	5922452
X_21056	X	21056	A_12_P104097	3.07843533766993	2.97510543088366	1	0.0860913020036115	0.292465167581969	X_21056	21056	X_1142327	1142327
V_1422457	V	1422457	A_12_P104108	3.04202027177096	3.0230904048009	1	0.0831328586551632	0.287419572206766	V_8249	8249	V_1828815	1828815
IV_13098759	IV	13098759	A_12_P104113	3.92756451887408	3.0282439317962	1	0.105273826530518	-0.323437361775955	IV_13065411	13065411	IV_13527947	13527947
X_5576572	X	5576572	A_12_P104117	4.79459196388409	2.96576779064701	1	0.125917785075047	0.353731323633994	X_5242819	5242819	X_5810100	5810100
III_3326662	III	3326662	A_12_P104124	3.20423454284775	3.02824265856259	1	0.0873635095211419	-0.294642246608353	III_2997634	2997634	III_3531924	3531924
IV_13902731	IV	13902731	A_12_P104133	3.28299687437624	3.0884105031113	1	0.0973755948512632	-0.310942097174989	IV_13408872	13408872	IV_14376301	14376301
IV_15961314	IV	15961314	A_12_P104134	9.22967913643694	2.93177101971316	1	0.226770305038319	-0.474704199164853	IV_15874687	15874687	IV_15983752	15983752
X_4501238	X	4501238	A_12_P104136	3.32318469408003	2.97405709719998	1	0.0878107444590944	-0.295395456339495	X_3713398	3713398	X_4862702	4862702
II_13056136	II	13056136	A_12_P104137	4.16859756028266	2.80871484858726	1	0.112924628353646	-0.334977485088124	II_12955386	12955386	II_13106619	13106619
I_11464112	I	11464112	A_12_P104139	15.6847644974724	3.10219594421296	1	0.270172818534059	-0.519522969029395	I_11376289	11376289	I_11543723	11543723
III_2360504	III	2360504	A_12_P104140	9.07759755564862	2.95040542125907	1	0.227893330633708	0.475878176896225	III_2340339	2340339	III_2594794	2594794
III_12135744	III	12135744	A_12_P104141	4.15537466136356	2.97942028959072	1	0.11058972311993	-0.331502926488016	III_11984213	11984213	III_12216028	12216028
V_5019415	V	5019415	A_12_P104145	3.46829118914589	2.94201439417258	1	0.0892177568296385	-0.297752647111922	V_4751303	4751303	V_5107998	5107998
V_1977814	V	1977814	A_12_P104146	3.90183409819299	2.95861561403791	1	0.110799676801986	0.331769093738202	V_1361176	1361176	V_2486919	2486919
X_5576572	X	5576572	A_12_P104146	3.08988812812968	3.01643030481063	2	0.0800104240510512	0.281929139469999	X_3713398	3713398	X_6076783	6076783
IV_6488811	IV	6488811	A_12_P104149	4.98408567579363	3.11904164629513	1	0.132133231022311	0.362326867019411	IV_5124198	5124198	IV_6766024	6766024
X_4862702	X	4862702	A_12_P104151	14.2711901403306	3.09542777645282	1	0.331758177763128	0.574123507986497	X_4674201	4674201	X_5676445	5676445
X_5810100	X	5810100	A_12_P104159	3.82827825999389	3.118078959147	1	0.103145378130581	-0.320144591210992	X_5638607	5638607	X_6468293	6468293
I_11604995	I	11604995	A_12_P104165	3.75272315679463	2.95822898117958	1	0.0864087448315232	0.292894348162018	I_11462776	11462776	I_12649342	12649342
V_1616055	V	1616055	A_12_P104168	3.09297029299815	3.06183524172972	1	0.088591325234026	0.296655739394875	V_8249	8249	V_1977814	1977814
I_11464112	I	11464112	A_12_P104187	9.54607730804402	3.03264523959805	1	0.177767552890906	-0.421587203881033	I_11373077	11373077	I_11575781	11575781
IV_12963367	IV	12963367	A_12_P104189	4.13317413104396	3.05739521885566	1	0.110461972587831	-0.331311399140575	IV_11558015	11558015	IV_13270875	13270875
X_6953360	X	6953360	A_12_P104197	7.32086441627678	3.08678584414829	1	0.202267068963862	0.448229374156493	X_6366333	6366333	X_7802067	7802067
II_3038907	II	3038907	A_12_P104197	3.1955846228356	2.96903687922438	2	0.069990685888726	0.263668256985595	II_2743069	2743069	II_3221906	3221906
IV_7328515	IV	7328515	A_12_P104206	7.68556357780195	3.02190584817081	1	0.193810055469417	0.438852052863995	IV_7124538	7124538	IV_8179349	8179349
III_1806339	III	1806339	A_12_P104210	4.54846704396113	2.88017942544515	1	0.122019058787178	-0.348212066596072	III_1500152	1500152	III_2059314	2059314
V_3219198	V	3219198	A_12_P104211	3.55769220544138	3.02503559340797	1	0.118060359816791	-0.342264756042839	V_2657849	2657849	V_3899067	3899067
V_15665599	V	15665599	A_12_P104217	3.09033190325072	3.03593147638309	1	0.0823629548147017	-0.286085562043207	V_15581687	15581687	V_16469911	16469911
X_5526747	X	5526747	A_12_P104217	3.15055051029834	3.04470538947168	2	0.0717996701306715	0.267110651001186	X_4504557	4504557	X_6695080	6695080
V_19519312	V	19519312	A_12_P104220	8.94013372139092	3.06173234373146	1	0.214402626512555	0.461577926595989	V_19432130	19432130	V_19684917	19684917
V_16310341	V	16310341	A_12_P104235	43.7058926388177	3.05862331705419	1	0.687077001341115	0.826290362002952	V_16307111	16307111	V_16436223	16436223
V_12898290	V	12898290	A_12_P104240	3.44267534799246	3.04549058391813	1	0.0929155772268672	0.303860498464883	V_11004172	11004172	V_13622608	13622608
I_1516275	I	1516275	A_12_P104257	3.87071808867018	3.13458221414843	1	0.0383923887982884	0.19532262345545	I_1345627	1345627	I_1742352	1742352
X_4179483	X	4179483	A_12_P104258	3.24440158223642	3.05522581458335	1	0.094444693460126	0.306285547254581	X_3713398	3713398	X_4862702	4862702
IV_13098759	IV	13098759	A_12_P104259	6.01481378403704	2.9858108819356	1	0.156533327578322	0.394396806834629	IV_12868784	12868784	IV_13261814	13261814
X_3088382	X	3088382	A_12_P104259	2.99197372964293	2.98266806557943	2	0.0512540258571397	-0.225680467682204	X_2597696	2597696	X_4025890	4025890
X_6597806	X	6597806	A_12_P104261	6.54798628923893	3.03180959161296	1	0.177560833495352	0.420009334503482	X_6300921	6300921	X_7002637	7002637
II_4678773	II	4678773	A_12_P104261	4.19606006355783	3.06520636281816	2	0.0818496275258601	0.285163350446774	II_4119401	4119401	II_5087635	5087635
II_2133052	II	2133052	A_12_P104284	3.75915215714062	2.99400218633016	1	0.0837324109480144	0.288454141955415	II_1211577	1211577	II_2428259	2428259
V_16230908	V	16230908	A_12_P104287	21.395204749293	3.11374077471483	1	0.435007613914795	0.659538307945351	V_16181609	16181609	V_16310341	16310341
II_5465868	II	5465868	A_12_P104291	46.3354531685645	3.16915864103367	1	0.725799565623269	-0.849255431823067	II_5463446	5463446	II_5839860	5839860
II_14204646	II	14204646	A_12_P104295	3.52876018327778	3.13873341311798	1	0.0909539136918761	0.300623667399699	II_13909294	13909294	II_14391450	14391450
IV_15746218	IV	15746218	A_12_P104300	3.13967003395489	2.9946046210063	1	0.0864234660332663	-0.29303492873057	IV_15415673	15415673	IV_16450691	16450691
V_15497715	V	15497715	A_12_P104313	5.08498510087685	3.05211493385247	1	0.151886295063722	0.388300960564953	V_15339524	15339524	V_15723870	15723870
IV_7662541	IV	7662541	A_12_P104313	3.27517030129119	2.99287447663709	2	0.135305764259981	0.366494380508372	IV_6481596	6481596	IV_9672074	9672074
X_4501238	X	4501238	A_12_P104314	4.06449877368926	3.08166743993098	1	0.106272511132712	-0.324967891582461	X_3453131	3453131	X_5341098	5341098
X_5361887	X	5361887	A_12_P104315	4.58803499839692	3.09227036324553	1	0.119703963337478	0.344892893841187	X_4639456	4639456	X_5714088	5714088
I_13164442	I	13164442	A_12_P104315	3.34468938319527	3.14748372795832	2	0.0918323505703288	0.302084075411228	I_12983458	12983458	I_13316670	13316670
III_1806339	III	1806339	A_12_P104318	9.15124851646388	3.08813236077245	1	0.230171292955965	0.47825064010545	III_1759505	1759505	III_1826973	1826973
IV_1586020	IV	1586020	A_12_P104321	3.43127163972612	2.96159504089578	1	0.0942992712304803	0.30611467467753	IV_1418793	1418793	IV_1791440	1791440
IV_9995259	IV	9995259	A_12_P104322	3.12678239095378	3.04954210902159	1	0.0815229340115351	-0.284617227297915	IV_4727677	4727677	IV_11595915	11595915
III_3346549	III	3346549	A_12_P104335	17.9889119941789	3.05661467597839	1	0.405686446999329	-0.634916381312395	III_3324989	3324989	III_3419646	3419646
IV_3798053	IV	3798053	A_12_P104337	3.12059685921065	3.04968532182625	1	0.086141799124755	-0.292574822572305	IV_3651400	3651400	IV_7396833	7396833
V_19398565	V	19398565	A_12_P104340	14.1524097845357	3.06878899344909	1	0.344534774040219	-0.585061992653556	V_19398038	19398038	V_19399164	19399164
V_10838024	V	10838024	A_12_P104350	21.9552714440933	3.16847663539065	1	0.456971671421804	0.673867669318305	V_10787751	10787751	V_11560384	11560384
II_4648873	II	4648873	A_12_P104351	3.90551088712524	2.76578375704669	1	0.106970357936982	0.326019965765152	II_3813472	3813472	II_5465868	5465868
I_13191405	I	13191405	A_12_P104355	3.14879292766386	3.06218032147327	1	0.0858862803381593	0.292097995577075	I_13023158	13023158	I_14116647	14116647
X_5569019	X	5569019	A_12_P104357	4.0984819629905	3.0404136378419	1	0.109163713463418	0.32935869387007	X_4630882	4630882	X_5949176	5949176
I_4715035	I	4715035	A_12_P104364	47.0489603895212	3.11222719731122	1	0.394367356464332	-0.626008832705206	I_4696914	4696914	I_4795749	4795749
I_4715035	I	4715035	A_12_P104364	17.1216589446387	2.96706259203115	2	0.394367356464332	-0.626008832705206	I_4696914	4696914	I_4795749	4795749
I_4715035	I	4715035	A_12_P104364	4.57801306945623	3.10173120690089	3	0.394367356464332	-0.626008832705206	I_4207054	4207054	I_4997003	4997003
II_2075279	II	2075279	A_12_P104367	6.33683689819298	3.00143988228958	1	0.134243237033168	-0.365238196174646	II_1988126	1988126	II_2304605	2304605
V_20268061	V	20268061	A_12_P104368	5.01303639077775	2.96855621724402	1	0.128597186232167	0.357475032551049	V_20141780	20141780	V_20921615	20921615
IV_6475869	IV	6475869	A_12_P104372	19.6050968643432	3.03130119574681	1	0.426561465108383	-0.650906516365322	IV_5847069	5847069	IV_6601583	6601583
I_1169919	I	1169919	A_12_P104380	3.57393772656466	3.09661806385853	1	0.0432536100353608	0.207319981555371	I_865340	865340	I_1280348	1280348
II_13755276	II	13755276	A_12_P104380	3.04087883334743	2.94297713521775	2	0.0783495875256803	0.279028354875022	II_13655631	13655631	II_14281777	14281777
III_10529604	III	10529604	A_12_P104386	3.56595606952725	2.81558428385004	1	0.0986534477580634	0.313095925952738	III_10146386	10146386	III_11011632	11011632
II_14189728	II	14189728	A_12_P104388	3.26842259550901	3.03745383624036	1	0.0860664212142686	0.292422902626706	II_13735025	13735025	II_14281777	14281777
X_6597806	X	6597806	A_12_P104394	4.08237517750071	3.01144984334666	1	0.111300353247355	0.332566310719642	X_6300921	6300921	X_7802067	7802067
II_4678773	II	4678773	A_12_P104394	3.19638407184268	3.07895651039984	2	0.0645315368773688	0.253230484252725	II_3373865	3373865	II_5087635	5087635
II_11891426	II	11891426	A_12_P104410	4.92989471525782	2.86709133352718	1	0.130276323414957	0.359801299982297	II_11306530	11306530	II_12049752	12049752
X_15607625	X	15607625	A_12_P104411	3.524942436762	2.84677619336764	1	0.0961916179130609	-0.309170889936372	X_15130022	15130022	X_16021441	16021441
IV_1311467	IV	1311467	A_12_P104413	6.2587852563083	3.00665397965368	1	0.175732292033103	-0.417756322742691	IV_1194490	1194490	IV_1429005	1429005
X_4758185	X	4758185	A_12_P104415	11.2827969289717	3.08774939198259	1	0.281064355744974	0.528408221114498	X_4630882	4630882	X_5361887	5361887
II_14071163	II	14071163	A_12_P104424	8.32542150144068	3.01009155041963	1	0.213960057575063	-0.461013727768739	II_13894030	13894030	II_14185034	14185034
X_2995671	X	2995671	A_12_P104424	9.50620677535268	3.03331944006339	2	0.187588667998027	-0.431668943610772	X_2672640	2672640	X_3097982	3097982
IV_15983752	IV	15983752	A_12_P104424	4.45913647520619	3.18925367583972	3	0.147231164555182	-0.382425971212923	IV_15954820	15954820	IV_17490756	17490756
V_1422457	V	1422457	A_12_P104434	3.12206026533397	3.00376808103711	1	0.0912845200552959	0.301117705008672	V_708390	708390	V_1776406	1776406
X_4758185	X	4758185	A_12_P104441	8.43607046753849	2.87422007141774	1	0.209564851181969	0.456340698656176	X_4630882	4630882	X_5676445	5676445
V_5045041	V	5045041	A_12_P104458	2.98741671782554	2.98468544560827	1	0.0779010367799948	0.27822849090711	V_4964433	4964433	V_5237566	5237566
X_4721441	X	4721441	A_12_P104460	3.20264516741132	3.07128029934902	1	0.0852196943862427	-0.291004676020119	X_3814926	3814926	X_5810100	5810100
III_12446786	III	12446786	A_12_P104462	4.80218083817812	3.10177273726743	1	0.139021137076795	-0.371530848740198	III_12286796	12286796	III_12570819	12570819
V_3680651	V	3680651	A_12_P104466	9.90039810595284	3.01467342007451	1	0.248816329349888	0.497243850414825	V_3537594	3537594	V_3897200	3897200
X_5810100	X	5810100	A_12_P104466	3.73334813213909	3.21758543318464	2	0.0653305769127936	0.254793431589722	X_3946591	3946591	X_7002637	7002637
II_4905764	II	4905764	A_12_P104470	4.07995458766226	3.03570130440823	1	0.109510004479968	-0.329880678902883	II_4364919	4364919	II_6548478	6548478
III_118992	III	118992	A_12_P104472	47.8039555872944	3.07343738778214	1	0.741193855683407	-0.849518846500964	III_29436	29436	III_119077	119077
IV_3417856	IV	3417856	A_12_P104473	4.30996841795843	2.90261652631126	1	0.117126535927475	0.341159626930603	IV_3370426	3370426	IV_3792388	3792388
II_6331341	II	6331341	A_12_P104474	7.34971851202413	2.99716782570133	1	0.191716632559067	0.436466764084581	II_5087635	5087635	II_6548478	6548478
II_3288020	II	3288020	A_12_P104481	15.7115919324805	2.99483831911772	1	0.344217206900608	-0.584816797248123	II_3254958	3254958	II_3373587	3373587
V_5571503	V	5571503	A_12_P104496	6.70098921884933	2.92398568909242	1	0.16685758803663	0.407195492661629	V_4964433	4964433	V_5796075	5796075
X_4758185	X	4758185	A_12_P104501	4.031868749499	3.05537917671259	1	0.106549390678519	0.325390947514779	X_3991931	3991931	X_5676445	5676445
I_14210742	I	14210742	A_12_P104501	3.01048087955969	2.99277063847817	2	0.0783850571150148	0.27909150709833	I_13860554	13860554	I_14508257	14508257
III_1559962	III	1559962	A_12_P104504	12.8593670163891	3.18910698396412	1	0.3108452994549	0.555779000657218	III_1474833	1474833	III_1606356	1606356
V_13155451	V	13155451	A_12_P104508	4.18433011920657	3.04638091275897	1	0.113355304612786	0.335594964305033	V_12442325	12442325	V_13299544	13299544
II_4996280	II	4996280	A_12_P104514	30.3022253589288	3.06983159401046	1	0.575899960896261	-0.756490547570543	II_4905764	4905764	II_5196296	5196296
II_4854419	II	4854419	A_12_P104519	3.46631991962607	2.93851374387199	1	0.0948824477927264	-0.307059770790729	II_4209585	4209585	II_5839860	5839860
V_3177786	V	3177786	A_12_P104520	8.58808870151347	2.96433067048601	1	0.218257140431421	0.465708550505156	V_2999110	2999110	V_3352971	3352971
X_4958735	X	4958735	A_12_P104520	9.08059646224737	3.05319923795951	2	0.167449407044069	0.407916984347629	X_4674201	4674201	X_5361887	5361887
IV_15712992	IV	15712992	A_12_P104520	9.09642124352267	3.08334300816075	3	0.0836858136491837	-0.288373868055301	IV_15625988	15625988	IV_15954820	15954820
IV_4391814	IV	4391814	A_12_P104520	5.59985979474848	3.11355909047396	4	0.062991138113583	0.250189862771503	IV_3919624	3919624	IV_4818285	4818285
V_1038256	V	1038256	A_12_P104523	9.92618769176658	2.95000887305199	1	0.243682982391231	-0.492087781821193	V_708390	708390	V_1113279	1113279
II_14204646	II	14204646	A_12_P104523	3.41575091189666	2.99363440944867	2	0.100635223021595	0.316231398015191	II_13909294	13909294	II_14255058	14255058
X_5291269	X	5291269	A_12_P104531	3.3602626357818	3.05043867371473	1	0.0887435851102258	-0.296960349802487	X_4284268	4284268	X_5676445	5676445
X_5291269	X	5291269	A_12_P104536	3.14626893323448	3.07738293007375	1	0.0878850176884388	0.295464240764455	X_3713398	3713398	X_5949176	5949176
V_18075291	V	18075291	A_12_P104538	10.2661003306119	3.06569996820804	1	0.249792101907385	-0.498217906541438	V_18034812	18034812	V_18247038	18247038
IV_5697478	IV	5697478	A_12_P104543	4.12094467120964	2.92782250293738	1	0.108765751181854	-0.328757798164038	IV_4757132	4757132	IV_7172090	7172090
II_11324153	II	11324153	A_12_P104550	7.47015987214659	2.94496382248206	1	0.193931953282311	0.438990040277596	II_9842467	9842467	II_11891426	11891426
II_13573967	II	13573967	A_12_P104553	4.26311557291924	3.00409998557304	1	0.111810946082661	0.335210554800034	II_13283657	13283657	II_13738578	13738578
III_10465571	III	10465571	A_12_P104554	3.19139284820339	2.9194097635659	1	0.088258620526765	0.296147826031316	III_9130830	9130830	III_10888656	10888656
V_5237566	V	5237566	A_12_P104576	3.4057852683349	3.06152924732813	1	0.0903631111584686	-0.299657787658926	V_4964433	4964433	V_5614890	5614890
V_529501	V	529501	A_12_P104581	27.9124129529032	3.08252968989958	1	0.53600163184429	-0.729815423513869	V_527699	527699	V_533022	533022
X_7628078	X	7628078	A_12_P104581	4.89945728734766	2.84015311016829	2	0.0600224983297472	0.244223255117632	X_6059440	6059440	X_7802067	7802067
V_1422457	V	1422457	A_12_P104584	9.48608422504953	3.09055167390087	1	0.236806456819758	0.485094947443001	V_1029076	1029076	V_1459352	1459352
V_5045041	V	5045041	A_12_P104584	3.217321891543	2.99595171666076	2	0.0121528243038583	-0.109892635998057	V_4563217	4563217	V_5237566	5237566
I_14594612	I	14594612	A_12_P104586	4.60542900807497	3.07559411801808	1	0.122696719485659	-0.349177665386286	I_14558365	14558365	I_14702813	14702813
IV_15758388	IV	15758388	A_12_P104594	11.6732821926244	3.10060061929889	1	0.279781880060992	-0.527278148224634	IV_15619530	15619530	IV_15983752	15983752
IV_10434018	IV	10434018	A_12_P104594	9.0120978233229	3.07442489293005	2	0.18312162725324	-0.426579323110878	IV_9987122	9987122	IV_11570976	11570976
II_13261146	II	13261146	A_12_P104594	3.30334561038914	2.98538889757319	3	0.0619980777380548	0.248209896500591	II_13174871	13174871	II_13537030	13537030
IV_4576321	IV	4576321	A_12_P104594	3.41658309679629	3.00087889477343	4	0.150134618472435	-0.386251699787795	IV_4281922	4281922	IV_5023053	5023053
V_4261110	V	4261110	A_12_P104594	3.06619754978536	2.94210990091823	5	0.0586016145428244	-0.241315252168916	V_3881987	3881987	V_4523149	4523149
V_7666834	V	7666834	A_12_P104597	3.68814930617925	3.06100536352715	1	0.0924610041626184	0.303116295195702	V_5848537	5848537	V_9905233	9905233
III_5980720	III	5980720	A_12_P104605	3.49393810402269	3.05257269976424	1	0.0948698901957001	-0.307039450591657	III_5553601	5553601	III_9125163	9125163
V_13010814	V	13010814	A_12_P104626	3.15642657637876	2.94103435299078	1	0.0852063795522863	-0.290981941660839	V_11806498	11806498	V_14156647	14156647
X_2372208	X	2372208	A_12_P104635	7.06955714747619	3.10179333628227	1	0.176183697652102	-0.418420391570443	X_2260211	2260211	X_3104255	3104255
X_3843271	X	3843271	A_12_P104637	4.34477240288824	3.05938917849601	1	0.115320061719463	-0.338518505125529	X_3713398	3713398	X_4322768	4322768
I_1781611	I	1781611	A_12_P104647	37.5882777256356	2.76786442579054	1	0.126789405330405	0.354723666439733	I_1767344	1767344	I_1868286	1868286
I_1781611	I	1781611	A_12_P104647	30.0380116780391	2.79854111295769	2	0.126789405330405	0.354723666439733	I_1767344	1767344	I_1868286	1868286
I_1781611	I	1781611	A_12_P104647	23.432157089061	2.74228862623326	3	0.126789405330405	0.354723666439733	I_1767344	1767344	I_1868286	1868286
I_1781611	I	1781611	A_12_P104647	17.8476689657411	2.90930422372836	4	0.126789405330405	0.354723666439733	I_1767344	1767344	I_1868286	1868286
I_1781611	I	1781611	A_12_P104647	13.2930288417234	2.81830510103846	5	0.126789405330405	0.354723666439733	I_1749612	1749612	I_1868286	1868286
I_1759606	I	1759606	A_12_P104647	10.1788727018971	2.90825704720116	6	0.102805044333796	0.319415432063572	I_1742352	1742352	I_1868286	1868286
I_1781611	I	1781611	A_12_P104647	7.54190897837174	2.96776398408398	7	0.126789405330405	0.354723666439733	I_1742352	1742352	I_1868286	1868286
I_1745486	I	1745486	A_12_P104647	5.69649372818903	3.02433932364079	8	0.109955824866857	0.330337442918031	I_1742352	1742352	I_1934140	1934140
I_1781611	I	1781611	A_12_P104647	3.92844513389241	3.01814164858257	9	0.126789405330405	0.354723666439733	I_1742352	1742352	I_1934140	1934140
V_575333	V	575333	A_12_P104651	47.285802765394	3.10358799404126	1	0.722227733148316	-0.849805375946527	V_545028	545028	V_676576	676576
II_2418128	II	2418128	A_12_P104653	10.822168060758	3.08320947667691	1	0.243566604469738	-0.492070878872978	II_2331900	2331900	II_2428259	2428259
IV_14378834	IV	14378834	A_12_P104653	4.11656297537973	3.03971961546448	2	0.13356304950981	0.364289549830236	IV_13700731	13700731	IV_15380612	15380612
X_7801408	X	7801408	A_12_P104661	4.0765169603612	3.0567601039708	1	0.111347475451452	0.333687628998868	X_6403674	6403674	X_10255916	10255916
III_555416	III	555416	A_12_P104669	5.63321606153397	3.14376243767142	1	0.151866008259814	-0.38843257503592	III_4664	4664	III_873827	873827
X_4758185	X	4758185	A_12_P104671	5.34080096221583	3.04688489119242	1	0.138549470973246	0.371049984035385	X_4630882	4630882	X_5638607	5638607
IV_4761504	IV	4761504	A_12_P104674	3.43910267474775	3.05911962831666	1	0.0953567747136049	-0.307794695987118	IV_3704922	3704922	IV_5697478	5697478
V_12898290	V	12898290	A_12_P104676	3.38924220757752	3.07238217567688	1	0.0915430931462457	0.30160794157657	V_11503957	11503957	V_13228106	13228106
V_20128871	V	20128871	A_12_P104677	3.87863729599187	3.02874434082672	1	0.103536335934436	-0.320750748508914	V_19995173	19995173	V_20921615	20921615
II_14608351	II	14608351	A_12_P104680	12.9395711861792	3.01791017489684	1	0.304827759482108	-0.550373149564998	II_14381332	14381332	II_15274701	15274701
X_4758185	X	4758185	A_12_P104694	4.34191380575381	3.07943326537891	1	0.11423921616331	0.336928375960029	X_4630882	4630882	X_5810100	5810100
X_3843271	X	3843271	A_12_P104712	3.47848320208269	3.07242233577024	1	0.0934702167604601	-0.304766063993297	X_3713398	3713398	X_4501238	4501238
V_11032432	V	11032432	A_12_P104714	5.64135814483942	3.06443478947404	1	0.145727642176004	-0.380540557791916	V_10155090	10155090	V_11806498	11806498
X_9235581	X	9235581	A_12_P104714	4.54861534063212	3.18824319417529	2	0.133181067989474	-0.363790394608855	X_8058569	8058569	X_11415068	11415068
IV_3792388	IV	3792388	A_12_P104714	4.63255070761213	2.98163894438693	3	0.0630613403952952	0.250329239585693	IV_3542018	3542018	IV_3952891	3952891
II_1990551	II	1990551	A_12_P104719	32.8907780794047	3.0189373406632	1	0.477598162271268	-0.688908121772712	II_1988126	1988126	II_2075279	2075279
III_10481103	III	10481103	A_12_P104728	2.99268424478022	2.97220109571133	1	0.0830245079257004	0.287232207820061	III_8009505	8009505	III_10888656	10888656
IV_4818285	IV	4818285	A_12_P104737	6.97321229720484	3.15792436571642	1	0.176794847479233	-0.419145476176816	IV_4755912	4755912	IV_5163110	5163110
IV_15683717	IV	15683717	A_12_P104743	5.06963982896906	3.05077040562094	1	0.133704880471814	-0.364505101848901	IV_15573322	15573322	IV_15983752	15983752
I_1451409	I	1451409	A_12_P104767	3.06960990085327	2.98506370048454	1	0.029072912546577	0.169970774076	I_1370806	1370806	I_1700575	1700575
V_18938530	V	18938530	A_12_P104776	11.5731224463724	2.94447695820402	1	0.267667486427922	0.515736408562605	V_18933316	18933316	V_19098196	19098196
II_13446733	II	13446733	A_12_P104777	2.96380862018058	2.86882582793712	1	0.0795240883111688	-0.2811119649043	II_13076591	13076591	II_13542748	13542748
V_5045041	V	5045041	A_12_P104787	3.67747323009347	3.02319516305061	1	0.0949569543326832	0.307180306633451	V_4964433	4964433	V_5269306	5269306
I_11858851	I	11858851	A_12_P104787	3.85583918529586	2.93656826222545	2	0.0759631717111516	-0.274746093537699	I_11789623	11789623	I_12098639	12098639
V_3143425	V	3143425	A_12_P104789	21.7873928728427	2.99443480399428	1	0.464831193422283	0.679637938020669	V_3126411	3126411	V_3181885	3181885
X_4862702	X	4862702	A_12_P104789	9.61248881546192	3.01622353354897	2	0.101596055797592	0.317737449623434	X_4536045	4536045	X_5361887	5361887
IV_15712992	IV	15712992	A_12_P104789	7.44921416017721	3.05943433434559	3	0.050443791673427	-0.223889560100559	IV_15625988	15625988	IV_15954820	15954820
X_4758185	X	4758185	A_12_P104791	6.6307397091505	3.0818095009269	1	0.18864052947903	-0.432762525373524	X_4674201	4674201	X_5676445	5676445
V_10220682	V	10220682	A_12_P104798	5.19922816287754	2.86792082270762	1	0.135765924534806	0.367303758210548	V_9918470	9918470	V_11637718	11637718
V_529501	V	529501	A_12_P104810	5.39738185564087	2.88746662643034	1	0.139905564432776	-0.372861442391818	V_8249	8249	V_690960	690960
I_11868440	I	11868440	A_12_P104824	49.0931091188157	2.96389390679622	1	0.406557341954735	-0.635269981767185	I_11865594	11865594	I_11902882	11902882
I_11868440	I	11868440	A_12_P104824	21.351109710444	3.02665032001653	2	0.406557341954735	-0.635269981767185	I_11858299	11858299	I_11902882	11902882
I_11858851	I	11858851	A_12_P104824	7.12701521636177	3.06046525488075	3	0.408320435471546	-0.636645960741426	I_11833643	11833643	I_11959318	11959318
X_5569019	X	5569019	A_12_P104828	9.61746890771708	2.92414690585958	1	0.237112074865175	0.485407873807248	X_4891523	4891523	X_5676445	5676445
X_12565734	X	12565734	A_12_P104828	3.71769781619602	3.08425983911983	2	0.223239124091609	0.470993741405588	X_10914595	10914595	X_12932361	12932361
V_4079351	V	4079351	A_12_P104832	71.1131009017353	3.18326493167836	1	0.857294686801388	0.920575672387906	V_4074054	4074054	V_4090452	4090452
V_1038256	V	1038256	A_12_P104833	3.18322498982011	3.0838077118529	1	0.0858969595646624	0.292158736159934	V_8249	8249	V_1776406	1776406
II_12793548	II	12793548	A_12_P104834	27.8885418323322	2.99933046319944	1	0.540438259815332	-0.732829637125299	II_12738858	12738858	II_12854640	12854640
V_5045041	V	5045041	A_12_P104837	2.97284249401751	2.96815596914634	1	0.0775371215105875	0.277577856930843	V_4884376	4884376	V_5602686	5602686
I_7602154	I	7602154	A_12_P104842	9.3582430076116	2.97656483987825	1	0.174892320701702	0.416841284281633	I_7283697	7283697	I_8955681	8955681
IV_12644720	IV	12644720	A_12_P104845	3.70488465771515	2.974344597704	1	0.102470592871631	-0.319089194326825	IV_8811605	8811605	IV_12887087	12887087
III_2594794	III	2594794	A_12_P104852	30.9112262754673	3.0485715493083	1	0.57445500827465	0.755540921257284	III_2571435	2571435	III_2615590	2615590
II_12182248	II	12182248	A_12_P104854	3.95150289182416	2.97474658303807	1	0.106556032288103	0.325381285262501	II_11882226	11882226	II_12271051	12271051
III_3016891	III	3016891	A_12_P104855	3.11839053186971	3.11316373073894	1	0.0845532289123927	0.289864533184862	III_2674957	2674957	III_3326662	3326662
X_3843271	X	3843271	A_12_P104859	3.17892809618996	3.02041565760171	1	0.0857862671160638	-0.291970428031494	X_3713398	3713398	X_4566632	4566632
II_12843474	II	12843474	A_12_P104866	6.20647461853213	3.01274711568742	1	0.161886316434194	0.401584230576061	II_12710067	12710067	II_12954737	12954737
V_12438003	V	12438003	A_12_P104866	3.33582283244417	3.04733338453878	2	0.064385173491644	-0.253615591052378	V_10119315	10119315	V_14362950	14362950
II_13446733	II	13446733	A_12_P104867	2.97048554343622	2.9461200441535	1	0.0796956456470076	-0.281415023002043	II_13189581	13189581	II_13539111	13539111
X_4322768	X	4322768	A_12_P104873	4.44891035990944	2.93777964216142	1	0.139069644745619	-0.371536672791509	X_3713398	3713398	X_4566632	4566632
X_3863779	X	3863779	A_12_P104877	3.28885548241309	2.98324736231902	1	0.0874061978952848	-0.294714223240447	X_3713398	3713398	X_4505845	4505845
X_5361887	X	5361887	A_12_P104896	4.09794904900042	3.02476785783942	1	0.107662896998393	-0.327086795606363	X_4504557	4504557	X_5714088	5714088
IV_7705207	IV	7705207	A_12_P104899	3.33563550674456	3.03413715829879	1	0.0911713493207904	-0.300976606390555	IV_6763856	6763856	IV_8986377	8986377
X_4893004	X	4893004	A_12_P104913	10.4318191482976	3.16257279174553	1	0.250853217535295	0.499274998716388	X_4674201	4674201	X_5526747	5526747
III_10684329	III	10684329	A_12_P104924	13.5469758412051	3.00583408583954	1	0.323913839749803	0.567341736336322	III_10609654	10609654	III_10888656	10888656
X_3843271	X	3843271	A_12_P104932	3.6050518404337	3.01119175530341	1	0.0966968733704223	-0.309981800972461	X_3713398	3713398	X_4501238	4501238
X_5341098	X	5341098	A_12_P104933	7.43096614356635	2.96384178507852	1	0.186279657364666	0.430241893813888	X_4171941	4171941	X_5676445	5676445
X_1142327	X	1142327	A_12_P104946	3.93325344438218	2.93194518766239	1	0.107325805461002	-0.326574341299511	X_21056	21056	X_1610131	1610131
IV_5163110	IV	5163110	A_12_P104949	5.82641386221957	2.84439180796591	1	0.150116324929293	0.386228167149354	IV_4368392	4368392	IV_6271528	6271528
V_1828815	V	1828815	A_12_P104955	5.10252927389535	2.97142347701936	1	0.136161813766414	-0.367838891578664	V_1615139	1615139	V_2280926	2280926
X_5576572	X	5576572	A_12_P104961	7.728027745152	3.05467632318021	1	0.194765538549778	0.439932492611939	X_4785093	4785093	X_5676445	5676445
X_6597806	X	6597806	A_12_P104966	9.12192525060749	3.05506563418422	1	0.233127264180294	0.481302166176816	X_6366333	6366333	X_6885628	6885628
X_5526747	X	5526747	A_12_P104970	3.97589529374005	3.02192038024743	1	0.105635630505394	0.323992678112899	X_4630882	4630882	X_5810100	5810100
II_4288682	II	4288682	A_12_P104973	3.57919225282587	2.84628554744216	1	0.105197688442287	0.323221575923832	II_3643588	3643588	II_5087635	5087635
II_14391450	II	14391450	A_12_P104973	2.96119314732664	2.93396514032973	2	0.0693130166852985	0.262364242762943	II_14018808	14018808	II_15274701	15274701
IV_15966979	IV	15966979	A_12_P104992	4.53120567241698	3.03293404609833	1	0.118644992113751	-0.343357065519474	IV_15619530	15619530	IV_16207052	16207052
I_4650804	I	4650804	A_12_P104997	4.38827952408232	2.81384087567488	1	0.0673037588819806	-0.258612576648859	I_4256443	4256443	I_7357149	7357149
IV_6271528	IV	6271528	A_12_P105007	4.23811533511411	3.06372926329097	1	0.111124152576456	0.332302961971593	IV_5124198	5124198	IV_7016150	7016150
II_12797115	II	12797115	A_12_P105016	62.8564483612888	3.06615659912154	1	0.82052422657309	0.902974914848809	II_12795470	12795470	II_12854640	12854640
II_4858788	II	4858788	A_12_P105017	2.94035564646967	2.91646615686856	1	0.0809103994394298	0.283551633750723	II_4515657	4515657	II_6548478	6548478
X_9086971	X	9086971	A_12_P105024	6.29076405129006	3.15911394499961	1	0.169036041200745	-0.409820054211692	X_8208528	8208528	X_10112699	10112699
X_5361887	X	5361887	A_12_P105025	3.42551241845836	2.98590105575006	1	0.0908609836153774	0.300482164010173	X_4630882	4630882	X_5676445	5676445
III_5224162	III	5224162	A_12_P105032	3.17488705382068	3.09816856707818	1	0.0885245553918042	0.296575606368998	III_3303713	3303713	III_6329927	6329927
IV_7016150	IV	7016150	A_12_P105040	55.3697274649267	3.19488623814618	1	0.764436479997438	0.871566809483749	IV_6945644	6945644	IV_7172090	7172090
II_14212376	II	14212376	A_12_P105045	3.24165996642705	3.02804770937882	1	0.0830620860189712	-0.287297203192527	II_13738578	13738578	II_14391450	14391450
IV_1697436	IV	1697436	A_12_P105075	17.2035825867439	3.10006630021001	1	0.39240550560402	0.62444979497897	IV_1669618	1669618	IV_1762281	1762281
X_3843271	X	3843271	A_12_P105079	3.00422064671035	2.98887322387876	1	0.0812739346393574	-0.284187926938718	X_2260211	2260211	X_4322768	4322768
X_4536045	X	4536045	A_12_P105095	4.14437333308379	3.00246448622381	1	0.108810851364848	0.328825951511906	X_3713398	3713398	X_7838301	7838301
V_3427441	V	3427441	A_12_P105123	50.2032736468515	3.1039918029784	1	0.756973969525586	-0.869914744532756	V_3427120	3427120	V_3491728	3491728
IV_8736539	IV	8736539	A_12_P105125	4.72126159388022	3.18373560787538	1	0.122300714252501	0.348613722292182	IV_7630216	7630216	IV_11595915	11595915
IV_2790891	IV	2790891	A_12_P105127	8.93034304603518	3.0037277089417	1	0.227466995783935	-0.475432840417612	IV_2629865	2629865	IV_2970233	2970233
X_3843271	X	3843271	A_12_P105132	3.02945533199437	2.95318229291368	1	0.0819271060803338	-0.285327603400404	X_3713398	3713398	X_4505845	4505845
X_11270961	X	11270961	A_12_P105133	6.22806507700584	2.88380335298566	1	0.160292336800947	-0.39910425817891	X_10513600	10513600	X_12844501	12844501
X_6953360	X	6953360	A_12_P105136	3.16670307984907	2.96468726207335	1	0.0917334524822054	0.301870744151162	X_6300921	6300921	X_7982412	7982412
X_5810100	X	5810100	A_12_P105138	4.80106585972472	3.03062603394024	1	0.12854064365436	0.357382027304117	X_4927721	4927721	X_7044171	7044171
X_4656473	X	4656473	A_12_P105140	3.84976273845914	2.94363058349826	1	0.1020004498419	-0.318369184405061	X_3934740	3934740	X_5361887	5361887
V_17330124	V	17330124	A_12_P105146	5.02488727474781	2.9690554321931	1	0.132094096865569	-0.362302796541977	V_16994521	16994521	V_17435067	17435067
X_3843271	X	3843271	A_12_P105148	3.9003439086448	3.09043432328989	1	0.104179021313886	-0.321751157485654	X_3713398	3713398	X_4566632	4566632
III_10344441	III	10344441	A_12_P105157	3.2873653985591	2.97992571037767	1	0.0969479308966539	0.310310936496789	III_9965262	9965262	III_10871365	10871365
V_20485981	V	20485981	A_12_P105161	7.68641591428307	2.95305209292576	1	0.189101630924991	-0.433479855540765	V_20251656	20251656	V_20921615	20921615
IV_8736539	IV	8736539	A_12_P105170	3.19075741452789	2.9656833691534	1	0.0888181579438012	-0.297035281107008	IV_7124538	7124538	IV_10327996	10327996
IV_1443918	IV	1443918	A_12_P105173	16.1990091121106	3.00628057224932	1	0.369135908687924	0.605651962103088	IV_1431180	1431180	IV_1487307	1487307
IV_5002403	IV	5002403	A_12_P105199	4.41523297581468	3.03667205318925	1	0.114710620326943	0.338456659252557	IV_4644715	4644715	IV_5646749	5646749
X_3034408	X	3034408	A_12_P105199	3.77070877013692	3.13530429164103	2	0.0790444965073759	-0.280263021658613	X_2611205	2611205	X_3716925	3716925
X_582924	X	582924	A_12_P105205	4.584718941355	2.97129951805668	1	0.125416427337077	-0.353012176262672	X_21056	21056	X_1472570	1472570
IV_1915145	IV	1915145	A_12_P105205	3.45915770893327	2.89292549950633	2	0.0679434731528743	0.259828235912455	IV_1852920	1852920	IV_2025013	2025013
X_3034408	X	3034408	A_12_P105213	3.05735401926408	2.98648596606958	1	0.0835336236822516	-0.288111532188227	X_2260211	2260211	X_3480739	3480739
V_16310341	V	16310341	A_12_P105217	7.00163487781492	3.01971779866833	1	0.175644281547287	-0.41777936824509	V_16302948	16302948	V_16625100	16625100
II_1990551	II	1990551	A_12_P105220	28.0709486007534	3.11059758386938	1	0.426101822121776	-0.650682562988321	II_1988126	1988126	II_2075279	2075279
II_2513769	II	2513769	A_12_P105221	3.39482004131161	3.11137332282365	1	0.0847521942979666	0.290205378360612	II_2106550	2106550	II_2568794	2568794
II_2196572	II	2196572	A_12_P105232	15.0740607085806	3.13398929732182	1	0.306038372503207	0.551431399236644	II_2131538	2131538	II_2334376	2334376
I_3518604	I	3518604	A_12_P105242	19.852686175758	3.05462073856809	1	0.184044149320579	0.427652474501778	I_3517036	3517036	I_3567600	3567600
I_3518604	I	3518604	A_12_P105242	7.99708770298525	3.14191398594707	2	0.184044149320579	0.427652474501778	I_3414460	3414460	I_3567600	3567600
V_5045041	V	5045041	A_12_P105243	3.39616603008111	3.0654751829635	1	0.0880451012268135	0.295789381911863	V_4959381	4959381	V_5237566	5237566
I_4259878	I	4259878	A_12_P105246	35.347259067114	2.95834811372465	1	0.350581128228184	0.590234034491431	I_4256443	4256443	I_4702300	4702300
I_4650804	I	4650804	A_12_P105246	11.1445572853784	2.96723333685773	2	0.357357007576892	0.595910630235232	I_4214934	4214934	I_4855280	4855280
IV_12262083	IV	12262083	A_12_P105253	19.4685375912737	3.02659109691926	1	0.423481063215166	-0.648704601727059	IV_12062878	12062878	IV_12596783	12596783
V_15348506	V	15348506	A_12_P105257	8.99906508638129	3.03544821111263	1	0.222827768449907	0.47055959871618	V_14290317	14290317	V_15420398	15420398
V_2486919	V	2486919	A_12_P105257	6.72879491248019	2.95083661527595	2	0.154800189918899	0.392207347991825	V_2272009	2272009	V_3007306	3007306
I_10575568	I	10575568	A_12_P105257	3.56604841289431	3.09281140672434	3	0.0446098940496693	-0.210545312648579	I_9523381	9523381	I_10826560	10826560
III_9993581	III	9993581	A_12_P105263	4.9928242572192	3.00326777785591	1	0.136839724745373	-0.368730995473186	III_9046121	9046121	III_10418745	10418745
IV_15619530	IV	15619530	A_12_P105284	3.68032646650154	3.01433556393412	1	0.0981943306847031	0.312372784150414	IV_15467845	15467845	IV_15961314	15961314
V_5107998	V	5107998	A_12_P105284	3.3318837180776	3.08460333727398	2	0.0644160202070811	-0.253003731206717	V_4834721	4834721	V_5703972	5703972
I_2260201	I	2260201	A_12_P105285	2.81832072174312	2.81178962087057	1	0.00195955330762311	-0.0441274186077542	I_2160112	2160112	I_2382076	2382076
X_5576572	X	5576572	A_12_P105289	4.49552583523424	2.92318176121861	1	0.119886168622585	0.345141365896664	X_3934740	3934740	X_5949176	5949176
X_3843271	X	3843271	A_12_P105301	3.31351572315496	3.02518546440315	1	0.0892468508611988	-0.297801191925731	X_3247588	3247588	X_4721441	4721441
I_13875092	I	13875092	A_12_P105303	15.8698053554377	3.06971260781406	1	0.364278214125853	-0.601653684585556	I_13792781	13792781	I_14116647	14116647
II_14281777	II	14281777	A_12_P105317	6.2083224497703	3.02648947601735	1	0.159099440468234	-0.397616416985622	II_14254434	14254434	II_15274701	15274701
V_2894620	V	2894620	A_12_P105326	9.61630760371746	3.07766984999124	1	0.241472052369499	-0.489850344713803	V_2820008	2820008	V_3143425	3143425
IV_6062184	IV	6062184	A_12_P105326	4.91635090211028	3.12910073468222	2	0.103348491624121	0.320466068579439	IV_4727677	4727677	IV_6763856	6763856
III_1809855	III	1809855	A_12_P105332	19.626735508402	3.13620029457969	1	0.490485189052334	-0.697728351022517	III_1806339	1806339	III_1861030	1861030
IV_15471143	IV	15471143	A_12_P105335	3.29450626447938	3.06019961652127	1	0.0891044774042894	0.297563559405421	IV_15325632	15325632	IV_16488050	16488050
I_1169919	I	1169919	A_12_P105337	3.60533874139952	3.02085704114673	1	0.0436141472634973	0.208182238556797	I_865340	865340	I_1185402	1185402
IV_12621984	IV	12621984	A_12_P105351	7.76150719311191	3.02058997458906	1	0.203556992396044	0.449724515543333	IV_12468362	12468362	IV_12887087	12887087
X_4175841	X	4175841	A_12_P105359	3.89044019430397	2.86584598642098	1	0.104333771346589	-0.321990037276646	X_3814926	3814926	X_4635054	4635054
X_6695080	X	6695080	A_12_P105364	3.5295761292718	3.16917275711589	1	0.097080484650114	-0.310596064952961	X_5779735	5779735	X_9235581	9235581
IV_4250670	IV	4250670	A_12_P105373	15.6010881055161	3.05208085516436	1	0.349736662313344	-0.589522739734079	IV_4043339	4043339	IV_4359912	4359912
V_13768624	V	13768624	A_12_P105379	3.20685457510813	3.10961059005014	1	0.0838951163568287	-0.288734262108934	V_11806498	11806498	V_15963459	15963459
V_20128399	V	20128399	A_12_P105388	23.8678496452484	3.14735008798661	1	0.484680628784788	-0.6939973508187	V_20103494	20103494	V_20199810	20199810
III_1362120	III	1362120	A_12_P105396	4.60954212504153	2.98911011045943	1	0.124805749820011	-0.347704853537974	III_1188573	1188573	III_1460260	1460260
II_13471245	II	13471245	A_12_P105397	28.5128975615808	3.08070478075195	1	0.543428174845932	-0.734853990655797	II_13449283	13449283	II_13531485	13531485
V_5045041	V	5045041	A_12_P105398	4.46432724114057	2.95251710158725	1	0.113993932722516	0.336566471517023	V_4959381	4959381	V_5237566	5237566
V_20128399	V	20128399	A_12_P105415	59.163954934919	3.12459047821927	1	0.785868770725498	-0.883492414567876	V_20113987	20113987	V_20128871	20128871
X_7002637	X	7002637	A_12_P105429	3.26897581232382	3.03764851768191	1	0.0902470874961186	0.299465349833432	X_6245967	6245967	X_8102133	8102133
IV_3367227	IV	3367227	A_12_P105429	3.113023455384	3.06238634235019	2	0.0815993987852132	0.284756378364504	IV_2926154	2926154	IV_3837377	3837377
IV_787345	IV	787345	A_12_P105439	56.7792614825238	3.17473072936787	1	0.776221885422015	0.878259635171492	IV_784688	784688	IV_872114	872114
IV_8127338	IV	8127338	A_12_P105443	6.99117173681459	3.02574191246318	1	0.17908143036359	-0.421830279034494	IV_7698565	7698565	IV_8736539	8736539
X_4893004	X	4893004	A_12_P105445	13.0511054485038	3.11284437840613	1	0.302806577909321	0.548545471244727	X_4674201	4674201	X_5390152	5390152
III_11411744	III	11411744	A_12_P105445	7.73457180740342	2.97014245366811	2	0.124014349587768	-0.350588317054206	III_11229090	11229090	III_11457434	11457434
II_4648873	II	4648873	A_12_P105452	3.32746719701506	3.04726280991194	1	0.0910584865613406	0.300808563171508	II_3746713	3746713	II_5087635	5087635
IV_4037719	IV	4037719	A_12_P105453	19.8480671452879	3.03684415911471	1	0.491700865391292	0.698592482029454	IV_3953879	3953879	IV_4295474	4295474
X_12236381	X	12236381	A_12_P105463	3.5515110070469	2.87087727262777	1	0.0963541486373641	0.309431975888947	X_10711645	10711645	X_12932361	12932361
X_4322768	X	4322768	A_12_P105464	3.53131652126515	2.97773090831989	1	0.0948185526045913	-0.306956364173231	X_3934740	3934740	X_5176675	5176675
V_5030874	V	5030874	A_12_P105467	3.17391558505633	3.14222848002889	1	0.0814048380738185	0.28441669775199	V_4602682	4602682	V_5237566	5237566
X_4758185	X	4758185	A_12_P105475	4.81648859563577	3.04194455834021	1	0.125876820317011	0.353673779352965	X_4175841	4175841	X_5638607	5638607
IV_15758388	IV	15758388	A_12_P105475	3.73136432125135	3.03214804823643	2	0.051475814425779	-0.226168227576818	IV_15619530	15619530	IV_16411900	16411900
II_12271051	II	12271051	A_12_P105481	6.42384322911666	3.09460077919513	1	0.166220369365549	-0.406417221876071	II_12058748	12058748	II_12544521	12544521
X_8465070	X	8465070	A_12_P105481	4.35530709125002	3.00270786193259	2	0.0703665015646339	0.264431361511867	X_7433720	7433720	X_9994332	9994332
IV_4750189	IV	4750189	A_12_P105481	3.28664756167187	3.03337605340823	3	0.0601409321001388	-0.244464081705602	IV_4366670	4366670	IV_5163110	5163110
X_4322768	X	4322768	A_12_P105482	3.51870448019578	3.06575816181262	1	0.0944968737181004	-0.306435235829056	X_3157218	3157218	X_5341098	5341098
III_12135744	III	12135744	A_12_P105487	4.04095936188373	2.92013302594286	1	0.107719524425219	-0.327172803178268	III_11912949	11912949	III_12216028	12216028
IV_2790891	IV	2790891	A_12_P105494	3.85326073410344	3.01006308051341	1	0.112803495628142	-0.334725723312192	IV_2425163	2425163	IV_2885000	2885000
V_11032432	V	11032432	A_12_P105501	4.03698629073079	3.10706857873863	1	0.106676878690191	0.325585556996688	V_10121039	10121039	V_13155451	13155451
IV_5847069	IV	5847069	A_12_P105502	3.20018641277767	2.92779062218081	1	0.0851572542715008	-0.290898047528609	IV_4757132	4757132	IV_8179349	8179349
III_6681836	III	6681836	A_12_P105508	4.294811027952	3.04299095682859	1	0.115824316851772	-0.339244133846898	III_4834284	4834284	III_8523397	8523397
II_13672258	II	13672258	A_12_P105514	10.1643374290763	3.07610564253388	1	0.24871187540736	0.497139467127552	II_13669810	13669810	II_13776440	13776440
III_4205381	III	4205381	A_12_P105518	9.19476737535043	3.02242841015574	1	0.229235888963222	-0.477996907303419	III_3672463	3672463	III_5224162	5224162
IV_4761504	IV	4761504	A_12_P105519	3.28368305766257	2.99189713952328	1	0.0881077256609377	-0.295894557269242	IV_4368392	4368392	IV_6062184	6062184
II_13372003	II	13372003	A_12_P105521	3.0402373930706	2.98466165932429	1	0.0814858723318097	0.284558223512723	II_13163270	13163270	II_13578819	13578819
II_10186755	II	10186755	A_12_P105527	2.93222712893996	2.88428272899531	1	0.0802580836096938	0.282406295588907	II_9360560	9360560	II_11508627	11508627
V_9663270	V	9663270	A_12_P105532	5.08277822503624	3.02929009398384	1	0.13238870664274	0.362691971889427	V_8337914	8337914	V_10176051	10176051
X_4758185	X	4758185	A_12_P105532	3.44242149228526	2.91462813028864	2	0.0662908845747589	-0.256648883966328	X_3991931	3991931	X_5361887	5361887
III_1758762	III	1758762	A_12_P105540	5.58033118668914	3.03996321931332	1	0.151292798134452	0.388960960483374	III_1534184	1534184	III_2069983	2069983
V_14190544	V	14190544	A_12_P105543	3.36258193692908	3.06434958217347	1	0.0877741031152762	-0.295333819145223	V_13755243	13755243	V_15269015	15269015
III_2742096	III	2742096	A_12_P105545	3.92479376674137	2.92130333425994	1	0.105577728342973	0.323903870728479	III_2592281	2592281	III_2900133	2900133
III_1273074	III	1273074	A_12_P105547	17.0105918583954	2.98868380473241	1	0.394686696195951	-0.624418654058116	III_1198473	1198473	III_1362169	1362169
V_1582251	V	1582251	A_12_P105547	3.14887012220299	3.03945311514661	2	0.058708595014791	-0.24152071933327	V_708390	708390	V_2659191	2659191
V_5045041	V	5045041	A_12_P105549	3.73134979776975	3.01247459781543	1	0.0962743139331797	0.309303758631238	V_4445869	4445869	V_5237566	5237566
V_4882186	V	4882186	A_12_P105553	44.1847038432819	2.99855696056038	1	0.679391438168311	-0.82138507538786	V_4847449	4847449	V_4889127	4889127
II_2304605	II	2304605	A_12_P105553	3.42579127041729	3.05050270294782	2	0.0485225892322243	-0.219512247510248	II_2195358	2195358	II_2428259	2428259
V_13155451	V	13155451	A_12_P105555	3.02819092284124	2.91682591974163	1	0.0815489558009664	0.284668349639532	V_12442325	12442325	V_13332418	13332418
IV_15683717	IV	15683717	A_12_P105568	5.06588379693702	3.0378713054242	1	0.133612909989569	-0.364379715711974	IV_15625988	15625988	IV_15983752	15983752
I_5497576	I	5497576	A_12_P105590	29.3084661690269	2.96505142987442	1	0.359179075315652	0.597427893072114	I_5480997	5480997	I_5961172	5961172
I_4997003	I	4997003	A_12_P105590	6.26013546848414	2.95028557520772	2	0.280986669539983	0.528412204421766	I_4775095	4775095	I_7273652	7273652
V_13158595	V	13158595	A_12_P105590	5.43319545178221	2.92878799187131	3	0.10068256743925	0.316305775705508	V_12889287	12889287	V_14190544	14190544
III_7946405	III	7946405	A_12_P105593	3.83594025514347	2.94550565833082	1	0.103650670247163	0.320934228837186	III_3627021	3627021	III_9125163	9125163
IV_16205584	IV	16205584	A_12_P105624	4.32891963990351	3.08144162171547	1	0.11469289871161	0.337532634550892	IV_16051015	16051015	IV_16497251	16497251
IV_4761504	IV	4761504	A_12_P105633	14.9430643544721	3.15114336985217	1	0.341180066706192	0.58226650266277	IV_4755912	4755912	IV_4844241	4844241
X_3843271	X	3843271	A_12_P105636	3.25421703191299	3.00246707142803	1	0.0877237958174816	-0.295249172447965	X_2594676	2594676	X_4175841	4175841
III_9758797	III	9758797	A_12_P105661	5.48394804651188	2.86296553858732	1	0.146158629337958	0.381102863641111	III_9191600	9191600	III_10595502	10595502
I_1451409	I	1451409	A_12_P105665	2.94686905454756	2.8799793069763	1	0.0282881775069727	0.167657801514953	I_1282314	1282314	I_1688137	1688137
X_1509755	X	1509755	A_12_P105670	3.2340532252522	3.00834971207557	1	0.0878560888580364	-0.295471715803833	X_21056	21056	X_2028158	2028158
X_5810100	X	5810100	A_12_P105674	6.56516181041666	3.022396511196	1	0.169540631130274	0.410456255711526	X_5638607	5638607	X_6695080	6695080
X_4025890	X	4025890	A_12_P105675	35.8785617527087	3.01618340677384	1	0.632726636540064	-0.79293582573348	X_3991931	3991931	X_4175841	4175841
II_3576221	II	3576221	A_12_P105675	4.27209520800118	2.91525430238637	2	0.0374583094726878	0.192931911877373	II_3535549	3535549	II_4069094	4069094
I_13394201	I	13394201	A_12_P105675	3.06673303035687	2.92690515552508	3	0.0124292465545132	0.110916758043287	I_13023158	13023158	I_14475736	14475736
III_10481103	III	10481103	A_12_P105682	3.25970353536926	2.96769480834087	1	0.0900885277195192	-0.299202161097743	III_9965262	9965262	III_10888656	10888656
I_13792781	I	13792781	A_12_P105693	18.4834876510835	3.05418399604594	1	0.408612508611807	-0.637214735093703	I_13788926	13788926	I_13875092	13875092
X_2636716	X	2636716	A_12_P105695	4.02432267271162	2.96178863190994	1	0.109494764068024	0.329857723500801	X_2594676	2594676	X_3863779	3863779
V_20445160	V	20445160	A_12_P105696	16.6383847660027	3.084265284077	1	0.363864101378731	-0.601311606333139	V_20234594	20234594	V_20921615	20921615
III_10235415	III	10235415	A_12_P105697	12.3695425178745	3.11087790389928	1	0.317747975715709	-0.561658396152888	III_9987327	9987327	III_10418745	10418745
X_2995671	X	2995671	A_12_P105703	3.67630265372758	3.07588428435947	1	0.0998505178600051	-0.314996074867037	X_2518073	2518073	X_3991931	3991931
II_8102088	II	8102088	A_12_P105715	3.92791233544156	2.93973748069163	1	0.107018057050054	0.326105791897137	II_7367480	7367480	II_9842467	9842467
IV_16450691	IV	16450691	A_12_P105715	3.94303395863889	3.06242036859346	2	0.084291469203121	0.289415504381998	IV_15961946	15961946	IV_16497251	16497251
V_1733937	V	1733937	A_12_P105718	3.55991969143835	2.98984827931878	1	0.0973797110046557	-0.311061823546896	V_708390	708390	V_1977814	1977814
I_2260201	I	2260201	A_12_P105721	3.28996012774743	2.89787638458046	1	0.00227213820375565	-0.0475168183528058	I_2250505	2250505	I_2382076	2382076
I_2260201	I	2260201	A_12_P105721	3.13467503308823	2.96725779860321	2	0.00227213820375565	-0.0475168183528058	I_2250505	2250505	I_2382076	2382076
V_676576	V	676576	A_12_P105740	53.6871516427334	3.08548906483438	1	0.769411709230768	-0.874345230952594	V_675557	675557	V_684064	684064
IV_3932378	IV	3932378	A_12_P105745	10.0662099542685	3.01911239687784	1	0.246643965781414	-0.49506842544323	IV_3895145	3895145	IV_4295474	4295474
X_5526747	X	5526747	A_12_P105748	3.4946116545894	2.96533318345346	1	0.0934860444629147	0.304791866556709	X_4536045	4536045	X_5922452	5922452
X_4721441	X	4721441	A_12_P105752	4.07347024496752	2.92176138603543	1	0.107056976684892	0.326165084529474	X_4504557	4504557	X_5676445	5676445
X_3843271	X	3843271	A_12_P105763	3.30922044797615	2.88820280070841	1	0.0891366168789812	-0.297617219303007	X_3713398	3713398	X_4505845	4505845
I_10575568	I	10575568	A_12_P105766	4.04560506077542	3.03662066457021	1	0.0973395359502008	0.311010188918131	I_10147200	10147200	I_10826560	10826560
V_533022	V	533022	A_12_P105768	4.53496413875361	2.9517239378733	1	0.118992537916524	0.343866481610101	V_8249	8249	V_690972	690972
II_14216872	II	14216872	A_12_P105768	3.55505276962896	3.0946051483697	2	0.0552019545507795	0.234210957144807	II_14136063	14136063	II_14404082	14404082
X_3843271	X	3843271	A_12_P105768	3.12080206537057	3.1102447989211	3	0.0931739579482084	-0.304282694566558	X_3136351	3136351	X_5291269	5291269
V_16436223	V	16436223	A_12_P105770	32.5622846743591	3.12120851041104	1	0.580940087816242	-0.759747400715753	V_16434531	16434531	V_16469911	16469911
II_14012154	II	14012154	A_12_P105772	3.25054958012163	2.95358290359914	1	0.095000022496711	-0.307148661267246	II_13875783	13875783	II_14204646	14204646
IV_4761504	IV	4761504	A_12_P105774	5.39379103143772	2.96582794539201	1	0.140460312296338	-0.373599938578414	IV_4566633	4566633	IV_5847069	5847069
II_13421195	II	13421195	A_12_P105774	3.03188779659439	2.98309290619283	2	0.0507825864252216	0.224640154667891	II_13371813	13371813	II_13755276	13755276
IV_4750189	IV	4750189	A_12_P105785	3.30684520751654	3.01763150365539	1	0.0878617730377857	-0.295481273975615	IV_3958558	3958558	IV_6481596	6481596
V_10458053	V	10458053	A_12_P105786	3.28027839331354	3.02796558119386	1	0.0880206427949382	0.295748294748325	V_9005254	9005254	V_12112105	12112105
I_11868440	I	11868440	A_12_P105792	3.77599528229808	3.15104886400604	1	0.0805469158900799	-0.282914000207506	I_11666065	11666065	I_12052126	12052126
III_5224162	III	5224162	A_12_P105792	3.36725602680183	3.15502094265888	2	0.0764983156946202	-0.275712158259777	III_4161821	4161821	III_9125163	9125163
I_1600696	I	1600696	A_12_P105798	3.39091210711284	2.95324889969588	1	0.0338637378811986	0.18344143042854	I_1370806	1370806	I_1683933	1683933
II_14608351	II	14608351	A_12_P105800	36.7035459216271	3.08699030347141	1	0.696712627693966	0.831727962367552	II_14606333	14606333	II_15274701	15274701
V_4617905	V	4617905	A_12_P105801	5.67894056043986	3.05575410255744	1	0.141581490030378	0.375088043541174	V_4258778	4258778	V_4792309	4792309
X_4322768	X	4322768	A_12_P105806	3.33447435087055	2.86669205775242	1	0.089784536608471	-0.298696926646881	X_3991931	3991931	X_4958735	4958735
II_13446733	II	13446733	A_12_P105807	3.11246489825328	3.09017292433224	1	0.0833358307442164	0.287770231300172	II_13163270	13163270	II_13573967	13573967
X_5291269	X	5291269	A_12_P105808	5.59804762547596	3.04950292874259	1	0.143228826753639	0.377263855308833	X_4630882	4630882	X_5949176	5949176
X_3843271	X	3843271	A_12_P105833	3.70121654268743	2.91786710498145	1	0.0991405368082589	-0.313874196804273	X_3713398	3713398	X_4501238	4501238
V_17938642	V	17938642	A_12_P105858	15.113605204468	3.0087534760417	1	0.364302088110804	0.601545598981228	V_17864186	17864186	V_17967873	17967873
I_398834	I	398834	A_12_P105861	10.3747892099394	2.92945482876709	1	0.166889772160623	0.407234761473116	I_398834	398834	I_628622	628622
III_1198787	III	1198787	A_12_P105880	23.4137034633902	3.06616672861157	1	0.492574896898223	-0.68729689241074	III_1198473	1198473	III_1275807	1275807
II_8007499	II	8007499	A_12_P105885	4.11356355552266	3.05040512661828	1	0.113147351864621	-0.335293972995381	II_6654199	6654199	II_9430890	9430890
X_3843271	X	3843271	A_12_P105893	4.95303971282094	3.12120833714281	1	0.130337650920939	-0.359885978147729	X_3789476	3789476	X_4566632	4566632
IV_13871463	IV	13871463	A_12_P105900	16.8919782918999	3.06545839860565	1	0.374790959200356	-0.610261308393276	IV_13754511	13754511	IV_14165470	14165470
IV_12801753	IV	12801753	A_12_P105926	17.557724288627	2.99112213555642	1	0.391311578160469	-0.623566293670923	IV_12697226	12697226	IV_13006565	13006565
III_2254736	III	2254736	A_12_P105938	4.66612653406614	2.83874466767489	1	0.14992015752096	-0.38572580773376	III_2156137	2156137	III_2355745	2355745
II_4120191	II	4120191	A_12_P105949	8.37447626997786	3.07701945130891	1	0.211620615555866	0.458573514595227	II_4119401	4119401	II_4411217	4411217
III_9692506	III	9692506	A_12_P105949	3.14667384462626	2.99073899383254	2	0.0714798194555171	0.266515029299643	III_9130830	9130830	III_10500696	10500696
X_4958735	X	4958735	A_12_P105951	14.3145626220583	3.17997519988316	1	0.35092557238589	0.590371343811799	X_4753798	4753798	X_5526747	5526747
X_5291269	X	5291269	A_12_P105954	5.24689129001185	3.0652176140115	1	0.134910781049036	0.366145170077033	X_4630882	4630882	X_5676445	5676445
IV_8778092	IV	8778092	A_12_P105959	4.08229753836955	3.11879721879872	1	0.106710918898641	0.325637499443679	IV_7381956	7381956	IV_9672074	9672074
V_1038256	V	1038256	A_12_P105975	9.79552583683464	3.12755027961124	1	0.240909087011932	-0.489278995585638	V_1005065	1005065	V_1436415	1436415
V_2271007	V	2271007	A_12_P105976	7.56896693670851	2.91796792932337	1	0.196662349157373	-0.442069540951292	V_2270981	2270981	V_2272126	2272126
II_14255896	II	14255896	A_12_P105976	2.85511655212989	2.84187044020201	2	0.0883784305016311	0.296348766348177	II_13909294	13909294	II_15274701	15274701
III_1759682	III	1759682	A_12_P105981	3.37269443044277	2.96252310073159	1	0.0913992764414199	-0.30129411364987	III_1500152	1500152	III_2063156	2063156
III_3627021	III	3627021	A_12_P105982	6.01626153074641	3.19437895805337	1	0.15973777824974	-0.402043525411425	III_3568455	3568455	III_5224162	5224162
V_1436415	V	1436415	A_12_P105999	4.70224320372546	2.95847457434177	1	0.125869975501995	0.353664163347017	V_1005065	1005065	V_1737453	1737453
II_13261146	II	13261146	A_12_P106004	3.66570814344935	2.92660994107022	1	0.0969002635396715	0.31030763432427	II_13174871	13174871	II_13459444	13459444
V_2819815	V	2819815	A_12_P106012	7.24048036051183	3.08491234600302	1	0.188812727259388	-0.433157276090433	V_2282576	2282576	V_3177786	3177786
V_5261629	V	5261629	A_12_P106012	3.34541253250454	2.98022170625696	2	0.159575854129373	-0.398211291157457	V_4964433	4964433	V_5885954	5885954
X_15521354	X	15521354	A_12_P106018	3.0928922439021	3.04496993950876	1	0.0853207788368889	0.291897758431419	X_15130022	15130022	X_16496969	16496969
I_14734963	I	14734963	A_12_P106019	21.5371549273445	2.9653032567529	1	0.452352000187749	0.670425817862511	I_14682966	14682966	I_14776886	14776886
II_1041031	II	1041031	A_12_P106030	3.55924362847381	2.99621363872945	1	0.0967109726790554	0.309829945459852	II_249866	249866	II_1296443	1296443
III_4161821	III	4161821	A_12_P106041	3.90939712460517	2.97105499946557	1	0.105525328178018	-0.323823481033606	III_3481204	3481204	III_5593439	5593439
II_13225059	II	13225059	A_12_P106041	3.09504424746004	3.0142582760256	2	0.0513656819187694	0.225926154562739	II_12610950	12610950	II_13459444	13459444
I_1451409	I	1451409	A_12_P106045	3.36397959605498	2.91802048738477	1	0.0317275159106972	0.177561177585284	I_1305437	1305437	I_1742352	1742352
V_5614890	V	5614890	A_12_P106046	3.30170711894018	2.97359705930235	1	0.0908815542642138	-0.300409751705415	V_5235073	5235073	V_7335113	7335113
X_12236381	X	12236381	A_12_P106059	3.93829510662224	3.09209515922123	1	0.106261727404473	0.324951403525975	X_10545442	10545442	X_12932361	12932361
IV_4755912	IV	4755912	A_12_P106061	12.1774148215701	2.9262430766314	1	0.315329924782575	0.559561695891935	IV_4656772	4656772	IV_4818285	4818285
II_14012154	II	14012154	A_12_P106061	3.14337149561233	3.13760714424007	2	0.021542312246453	-0.146255276219978	II_13537030	13537030	II_15274701	15274701
II_13655631	II	13655631	A_12_P106064	3.31635092157898	2.94974743970921	1	0.0892422878129295	-0.297787614259758	II_13539564	13539564	II_14608351	14608351
V_11671299	V	11671299	A_12_P106073	3.53556587521899	3.02065805791522	1	0.0936332910360815	0.305031805576424	V_10332855	10332855	V_13228106	13228106
III_4461397	III	4461397	A_12_P106075	51.96568067199	3.04907349369332	1	0.765773934234568	-0.872275831926939	III_4388630	4388630	III_4911067	4911067
X_5526747	X	5526747	A_12_P106084	4.13646889689154	2.88220237457927	1	0.109651638535463	0.33009393449244	X_4630882	4630882	X_5922452	5922452
V_533022	V	533022	A_12_P106085	33.1886601275518	3.02328688733687	1	0.597557738238049	-0.770568444225782	V_527699	527699	V_537511	537511
IV_6109938	IV	6109938	A_12_P106087	4.23295467643785	3.03918825287768	1	0.111544647052721	0.332931086550974	IV_4757132	4757132	IV_6766024	6766024
V_1977814	V	1977814	A_12_P106098	6.35002407793203	2.9597424882315	1	0.168777717829287	-0.409515201815845	V_1972858	1972858	V_2271884	2271884
IV_15746218	IV	15746218	A_12_P106099	3.3723881535317	3.12755164393897	1	0.0935901018724647	0.304936542191339	IV_15564470	15564470	IV_16497251	16497251
X_5341098	X	5341098	A_12_P106100	11.7702997280144	3.08474043796524	1	0.277894120114458	0.525496297182703	X_4639456	4639456	X_5638607	5638607
II_1041031	II	1041031	A_12_P106109	4.44570815008901	3.0330877513271	1	0.0980645789543992	0.312166334821991	II_6368	6368	II_1618934	1618934
III_12292760	III	12292760	A_12_P106109	3.37531635497533	2.84358967826717	2	0.0982252583623015	0.312421973365805	III_12133161	12133161	III_12393485	12393485
IV_13098759	IV	13098759	A_12_P106112	10.0756222368158	2.98758015814736	1	0.247803672609066	0.496230953231314	IV_12868784	12868784	IV_13206263	13206263
II_13261146	II	13261146	A_12_P106112	3.24584162410029	2.99842416118248	2	0.0752550741515204	0.273462560140079	II_13163270	13163270	II_13484787	13484787
X_6468293	X	6468293	A_12_P106113	6.72938630310484	3.13993303297464	1	0.176912433611878	-0.419284839693387	X_6366333	6366333	X_8208528	8208528
IV_4576321	IV	4576321	A_12_P106113	3.14715107303881	3.0173061326653	2	0.0506205662124967	0.224281514778944	IV_4281922	4281922	IV_4844241	4844241
II_3331906	II	3331906	A_12_P106129	6.23211209469939	2.91589748204118	1	0.154168381923979	-0.391406143869828	II_3223762	3223762	II_3542182	3542182
V_13228106	V	13228106	A_12_P106137	3.76171422921931	2.91852930194491	1	0.0993024318712353	-0.314130368278142	V_11004172	11004172	V_14156647	14156647
X_3796301	X	3796301	A_12_P106140	3.51882030730171	2.94347343038677	1	0.094867770730204	-0.307036020825085	X_3154731	3154731	X_4505845	4505845
V_9985933	V	9985933	A_12_P106140	3.22220773508031	2.93355917303338	2	0.0551410879795886	0.234081799130388	V_8766484	8766484	V_11637718	11637718
V_5722437	V	5722437	A_12_P106150	7.97790995505624	2.96437188201058	1	0.192595279960989	-0.437474557994007	V_5699019	5699019	V_7093878	7093878
V_4169873	V	4169873	A_12_P106152	4.47050446598708	3.14310250878612	1	0.120199094226616	0.345584414018259	V_4121406	4121406	V_4516065	4516065
I_11388363	I	11388363	A_12_P106152	3.70007282311963	3.01535267935016	2	0.0676158490713519	-0.259195706255731	I_10941813	10941813	I_11858851	11858851
IV_12262083	IV	12262083	A_12_P106154	4.8413858250393	2.95485906825926	1	0.128553046873842	-0.357413677893105	IV_11570976	11570976	IV_12672698	12672698
III_977059	III	977059	A_12_P106158	6.90740035648299	2.97823064705305	1	0.179433543894747	-0.422253346409049	III_941809	941809	III_1189916	1189916
I_9631422	I	9631422	A_12_P106158	3.32168207833856	3.20233031596495	2	0.064993556517378	0.254130291177282	I_7158584	7158584	I_10158231	10158231
II_2304259	II	2304259	A_12_P106158	3.63299286294228	3.0340273334959	3	0.0827123819640091	0.286686040601263	II_2195358	2195358	II_2418128	2418128
IV_5002403	IV	5002403	A_12_P106164	4.06469640262606	2.98407985756748	1	0.106559518864711	-0.326430296222391	IV_4281922	4281922	IV_6109938	6109938
II_4905764	II	4905764	A_12_P106170	3.22821679669797	3.05666275012668	1	0.0877048338129869	-0.295217260817526	II_4364919	4364919	II_5465868	5465868
IV_4693652	IV	4693652	A_12_P106176	48.8410407847581	3.03564592303899	1	0.724369638435523	-0.848418443072751	IV_4656772	4656772	IV_4750189	4750189
IV_4761504	IV	4761504	A_12_P106182	9.36716943777629	3.00819885584564	1	0.246378558823331	0.494696888456636	IV_4566633	4566633	IV_5023053	5023053
V_2819815	V	2819815	A_12_P106182	7.71171222295148	3.01064049291002	2	0.164742547729367	-0.404520571846005	V_2659191	2659191	V_3177786	3177786
X_3843271	X	3843271	A_12_P106184	3.03153730991663	3.03023755344349	1	0.081980974421515	-0.285421391645407	X_3136351	3136351	X_4862702	4862702
X_3843271	X	3843271	A_12_P106193	3.48504827568307	3.04824001103913	1	0.0936378733923632	-0.305039269520572	X_3713398	3713398	X_3940409	3940409
IV_1048458	IV	1048458	A_12_P106195	11.985734948615	3.04657207798202	1	0.267670663487588	-0.515739469301325	IV_1033604	1033604	IV_1113082	1113082
II_12691188	II	12691188	A_12_P106209	4.10434941581914	3.0603172778836	1	0.108353266288189	-0.328133812955348	II_12544141	12544141	II_12731999	12731999
III_3326662	III	3326662	A_12_P106217	3.23540206544059	3.02035868460704	1	0.0881741042736017	-0.296005996828904	III_2896298	2896298	III_5369519	5369519
X_3843271	X	3843271	A_12_P106222	4.48762346236864	3.00679788921227	1	0.118870737753227	0.343690446550929	X_3716925	3716925	X_5810100	5810100
II_2332147	II	2332147	A_12_P106226	38.5349458492367	3.08831483247122	1	0.566910382564497	-0.75466005628306	II_2316511	2316511	II_2334376	2334376
X_4175841	X	4175841	A_12_P106227	4.36521958503876	2.96243282189021	1	0.116280183661942	0.339924788375485	X_3907685	3907685	X_4501238	4501238
II_4678773	II	4678773	A_12_P106227	3.72996278594789	3.08171577229515	2	0.0924981871235478	0.303177237798284	II_4288682	4288682	II_4996280	4996280
I_9631422	I	9631422	A_12_P106234	5.55105921592815	2.96144069956371	1	0.122146710048811	-0.348394161470333	I_9523381	9523381	I_10093210	10093210
I_12884357	I	12884357	A_12_P106236	4.64597097870875	3.04732130626057	1	0.1190842629941	-0.343998990354923	I_12804294	12804294	I_13023158	13023158
V_10815911	V	10815911	A_12_P106245	4.16048388832108	3.10744088218032	1	0.119661609232206	-0.344734693886431	V_9005254	9005254	V_11806498	11806498
III_10465571	III	10465571	A_12_P106245	3.83417204492872	2.93896043874968	2	0.0747701422547569	0.272503244004063	III_10275321	10275321	III_10716422	10716422
V_1977814	V	1977814	A_12_P106247	4.88468020891964	2.84650654949715	1	0.13129311736278	-0.361202677850378	V_1813788	1813788	V_2486777	2486777
X_4656473	X	4656473	A_12_P106249	3.3785306251444	3.01435527892452	1	0.0901172664891943	-0.299249880916026	X_4175841	4175841	X_5949176	5949176
III_12382090	III	12382090	A_12_P106255	5.46293533880123	2.97751427004334	1	0.140779295930801	-0.374023918424849	III_12292760	12292760	III_12540486	12540486
V_7343033	V	7343033	A_12_P106256	3.20495568225984	2.97645962321222	1	0.0780409256331673	0.278478189812976	V_5167653	5167653	V_7666834	7666834
V_15834792	V	15834792	A_12_P106262	8.60746790149489	3.0565388279304	1	0.209962723516531	-0.456773689306687	V_15782684	15782684	V_16165290	16165290
X_3843271	X	3843271	A_12_P106271	3.20291470475284	3.00733407887475	1	0.0864040109417514	-0.293019776618042	X_3136351	3136351	X_3991931	3991931
X_5361887	X	5361887	A_12_P106272	11.423991387247	3.03715490310438	1	0.270997971544031	0.518935045825479	X_4753798	4753798	X_5676445	5676445
X_4322768	X	4322768	A_12_P106295	4.88908110556295	3.01573826510778	1	0.128770986927902	-0.357716516961367	X_3946591	3946591	X_5176675	5176675
II_1418895	II	1418895	A_12_P106299	42.2345389651979	3.06000135418483	1	0.488988099965216	-0.696792723308907	II_1417887	1417887	II_1619961	1619961
II_1418895	II	1418895	A_12_P106299	9.34501878760414	2.78482979953488	2	0.488988099965216	-0.696792723308907	II_1289608	1289608	II_1732850	1732850
V_1616055	V	1616055	A_12_P106300	3.38679058622266	3.10384152249044	1	0.0921009752530956	0.302525575507939	V_708390	708390	V_1977814	1977814
V_18326576	V	18326576	A_12_P106305	3.92102368287366	3.06793951703788	1	0.106265856332941	0.324937940145794	V_18137835	18137835	V_18648657	18648657
IV_13705298	IV	13705298	A_12_P106305	4.07718262150295	3.03293249313091	2	0.0994432835131917	0.314333941163843	IV_13356132	13356132	IV_14165470	14165470
II_6697935	II	6697935	A_12_P106305	3.70757996063079	3.07255834421521	3	0.0843540241666602	0.289505255984265	II_6419993	6419993	II_7659303	7659303
IV_13871463	IV	13871463	A_12_P106320	11.2471273485058	3.07400689787216	1	0.288762992554514	0.535548215619724	IV_13408872	13408872	IV_14165470	14165470
III_10884949	III	10884949	A_12_P106328	7.93758680554704	3.01694928180392	1	0.203916984410072	-0.450974620585926	III_10500696	10500696	III_11052616	11052616
X_4402562	X	4402562	A_12_P106339	3.64529582684328	2.90503859342643	1	0.0973081624531322	0.310960064045874	X_3713398	3713398	X_5676445	5676445
IV_2691064	IV	2691064	A_12_P106355	28.4879417738656	3.05426061742723	1	0.558055733078171	-0.744678419583515	IV_2675332	2675332	IV_2759710	2759710
X_4958735	X	4958735	A_12_P106361	24.0083408479324	3.0164975922057	1	0.479520432922443	0.690293112484151	X_4674201	4674201	X_5361887	5361887
X_4758185	X	4758185	A_12_P106373	13.6640057773456	3.07149934065822	1	0.315956205240485	0.560329420337338	X_4674201	4674201	X_5361887	5361887
II_13672258	II	13672258	A_12_P106374	3.15235138975434	3.04503625287922	1	0.0851013173291384	0.290802491251818	II_13445806	13445806	II_13842684	13842684
X_16515500	X	16515500	A_12_P106377	18.1074677775634	3.11078727290438	1	0.414982197685683	0.642082468021067	X_16478903	16478903	X_17709225	17709225
X_4758185	X	4758185	A_12_P106377	5.35604575333686	3.04786709456323	2	0.065301521385211	-0.254705151215863	X_4483054	4483054	X_5341098	5341098
IV_15619530	IV	15619530	A_12_P106382	4.80903419804302	2.88762713022244	1	0.126271273671159	0.354227490064298	IV_15393010	15393010	IV_15983752	15983752
X_15410652	X	15410652	A_12_P106389	3.83133027794288	2.99211806331716	1	0.10562219928884	-0.323938791829413	X_15130022	15130022	X_15930189	15930189
V_1372698	V	1372698	A_12_P106394	14.9005006888829	2.91958636770152	1	0.343175866723651	-0.583967060662865	V_1029076	1029076	V_1582251	1582251
I_1451409	I	1451409	A_12_P106398	4.37671867977375	2.95555053522331	1	0.0406893635588983	0.20108071914529	I_1036866	1036866	I_1623032	1623032
IV_13374799	IV	13374799	A_12_P106410	8.72466203537382	3.00085849520502	1	0.219400345159139	0.466926620331814	IV_13117565	13117565	IV_13418977	13418977
X_3843271	X	3843271	A_12_P106418	4.05284842310046	2.95695033396515	1	0.108018213987674	-0.327626088935655	X_3789476	3789476	X_5638607	5638607
II_4678773	II	4678773	A_12_P106421	3.31942667742013	3.02499787657598	1	0.0906168069618031	0.300078139718451	II_3570582	3570582	II_4996280	4996280
IV_7328515	IV	7328515	A_12_P106424	8.19922473682431	3.11522821467504	1	0.205289413209929	0.451661692890775	IV_6601583	6601583	IV_7396833	7396833
X_3843271	X	3843271	A_12_P106426	3.40254088779894	3.19642703180274	1	0.091528508549862	-0.301583914611992	X_3716925	3716925	X_4322768	4322768
X_3843271	X	3843271	A_12_P106432	4.00918282885628	2.99501130436195	1	0.106920695770823	-0.32595741833055	X_3716925	3716925	X_4656473	4656473
II_13446733	II	13446733	A_12_P106433	3.26214426279809	2.91714393080865	1	0.0871572606876736	0.294294243598858	II_13374406	13374406	II_13663523	13663523
IV_4755912	IV	4755912	A_12_P106436	6.64286183516738	3.05997874310523	1	0.167483469077493	0.407958470835038	IV_4566633	4566633	IV_5163110	5163110
V_14290503	V	14290503	A_12_P106439	3.11737807358395	3.07299696801852	1	0.080466433678804	0.282764272405819	V_13796956	13796956	V_15831985	15831985
II_13106619	II	13106619	A_12_P106441	3.64727495278513	3.0099744563097	1	0.104568227086748	-0.322221365608997	II_12955386	12955386	II_13190752	13190752
IV_2530706	IV	2530706	A_12_P106445	6.97757134383423	2.96321712830819	1	0.182395386220887	-0.425732598501742	IV_2231355	2231355	IV_2650991	2650991
I_12098639	I	12098639	A_12_P106446	4.36634584307882	3.06010674586036	1	0.0909340157724189	-0.30060290039109	I_11959037	11959037	I_12343109	12343109
X_3843271	X	3843271	A_12_P106446	3.19634600847963	3.08676410079914	2	0.077720250572244	0.277905458681314	X_3136351	3136351	X_3907685	3907685
V_5030874	V	5030874	A_12_P106449	3.49181341375883	3.03624788180581	1	0.0891535576086015	0.297645499562492	V_4258778	4258778	V_5269306	5269306
X_3843271	X	3843271	A_12_P106456	3.54394821410141	3.1266698146675	1	0.0951406149647847	-0.307477228940953	X_3713398	3713398	X_3991931	3991931
X_4958735	X	4958735	A_12_P106464	5.11288310856206	2.94820830804584	1	0.131714081221142	0.361781274768624	X_3907685	3907685	X_5676445	5676445
I_12607684	I	12607684	A_12_P106465	26.7172175758096	3.14678475711877	1	0.452813254280754	-0.670711331742117	I_12597637	12597637	I_12649342	12649342
III_2693860	III	2693860	A_12_P106465	3.22216772889276	3.04679430941994	2	0.0736952889214387	0.270580155159976	III_2582238	2582238	III_5617374	5617374
II_1727040	II	1727040	A_12_P106466	3.3175254517964	3.08353418534955	1	0.0763038698023554	-0.275361528268092	II_1211577	1211577	II_2522027	2522027
X_16496969	X	16496969	A_12_P106471	9.96918032257629	3.02500123574059	1	0.248561500148425	-0.496989155086183	X_16401229	16401229	X_17709225	17709225
I_14696837	I	14696837	A_12_P106488	8.44531682282502	2.93705819650061	1	0.207639023262068	-0.454239053203694	I_14639202	14639202	I_14763117	14763117
IV_3373167	IV	3373167	A_12_P106489	9.37796955036193	3.15303370925745	1	0.237853261585323	-0.48756660910336	IV_3354799	3354799	IV_3469456	3469456
IV_1240607	IV	1240607	A_12_P106512	11.0799352044153	3.06752246950675	1	0.260020974344201	-0.508306277725284	IV_1231327	1231327	IV_1331702	1331702
II_12066947	II	12066947	A_12_P106516	21.0843116559618	3.11766721198722	1	0.45132333931184	0.669663100641516	II_12043778	12043778	II_12076112	12076112
V_2302069	V	2302069	A_12_P106518	18.9147555504224	3.03217928283106	1	0.418979717872584	-0.645247723984632	V_2282576	2282576	V_2486879	2486879
II_13996883	II	13996883	A_12_P106518	18.6584188943988	3.09968098973206	2	0.341706631099547	0.582715653462943	II_13882420	13882420	II_14071163	14071163
II_8864770	II	8864770	A_12_P106518	3.232546049028	3.043766230201	3	0.0522551895613387	0.227873957639716	II_6339504	6339504	II_10800977	10800977
IV_12963367	IV	12963367	A_12_P106521	28.4660479643509	2.95267233894708	1	0.549783436023898	0.739138470494283	IV_12868784	12868784	IV_13006565	13006565
IV_15712992	IV	15712992	A_12_P106521	3.34745469606734	3.03158569659154	2	0.00464444131036558	-0.0679354913698199	IV_15625988	15625988	IV_15983752	15983752
X_12859131	X	12859131	A_12_P106540	22.7184944754826	3.12466636916304	1	0.479314341176093	-0.6901169347212	X_12840430	12840430	X_13066152	13066152
V_20113987	V	20113987	A_12_P106544	5.15064344393762	3.01864028478214	1	0.135159654062878	-0.366482732670314	V_20005738	20005738	V_20445160	20445160
V_7093878	V	7093878	A_12_P106559	30.8007746162987	3.08770725326185	1	0.587407553970357	0.763759343540596	V_7086818	7086818	V_7335689	7335689
V_9985933	V	9985933	A_12_P106565	3.39639153427565	2.94756497657239	1	0.0909856867095362	0.300688293231056	V_9889822	9889822	V_11637718	11637718
X_4322768	X	4322768	A_12_P106576	3.10764404110666	2.89424754326301	1	0.0839479043407097	-0.288825085647998	X_3713398	3713398	X_5810100	5810100
IV_787345	IV	787345	A_12_P106582	33.6333578195459	3.17388525245946	1	0.598818725486315	0.771396506331285	IV_780690	780690	IV_872114	872114
III_6681836	III	6681836	A_12_P106588	54.6755728593059	3.07017453345725	1	0.778132143422978	-0.879339655975585	III_6330537	6330537	III_6815334	6815334
V_13768624	V	13768624	A_12_P106604	3.14533752487767	2.89172476292291	1	0.0823579712042597	0.286076906692235	V_12889287	12889287	V_15572136	15572136
III_12251835	III	12251835	A_12_P106605	7.21894363914875	3.0130913049571	1	0.18323290347708	-0.426708911647168	III_12168916	12168916	III_12292760	12292760
V_5045041	V	5045041	A_12_P106618	3.18885191317623	3.18792094559094	1	0.0829151283488822	-0.287042940261967	V_4959381	4959381	V_5269306	5269306
V_13010814	V	13010814	A_12_P106621	3.65754508371017	3.1497085977866	1	0.0980316348685496	-0.312113895406556	V_11806498	11806498	V_13622608	13622608
III_5111616	III	5111616	A_12_P106624	3.54392109548756	3.06830888570095	1	0.0958499230950088	-0.308621278252179	III_3627021	3627021	III_5748303	5748303
X_3843271	X	3843271	A_12_P106627	3.27163973607974	2.96621634430166	1	0.0881715600256844	-0.296001726198202	X_3713398	3713398	X_4566632	4566632
II_14282734	II	14282734	A_12_P106628	10.2447822306944	3.0615796637457	1	0.249346558085683	0.497773382915591	II_14218855	14218855	II_15274701	15274701
V_13010814	V	13010814	A_12_P106628	4.12125534127216	3.03019590259439	2	0.062656350953391	0.24952411878024	V_12792401	12792401	V_13855621	13855621
II_12716738	II	12716738	A_12_P106643	17.2697701704997	3.17560221657786	1	0.376630664614037	-0.611769497683327	II_12695696	12695696	II_12762690	12762690
IV_5646749	IV	5646749	A_12_P106643	3.47023260807461	2.97664880188357	2	0.0792075231301092	-0.280551889331151	IV_4757132	4757132	IV_6475869	6475869
V_5019415	V	5019415	A_12_P106646	3.28678351906009	2.99426468505179	1	0.0854980780516326	-0.291473756923941	V_4884376	4884376	V_5237566	5237566
IV_4755912	IV	4755912	A_12_P106648	3.51335370136938	3.01199070136205	1	0.0959468323586464	-0.30874552786995	IV_2926154	2926154	IV_6292874	6292874
V_4617905	V	4617905	A_12_P106648	3.59019505932069	2.95879671572708	2	0.0877424676501934	0.295250252102772	V_4258778	4258778	V_5019415	5019415
III_5111616	III	5111616	A_12_P106648	3.62943191082636	3.06571947724954	3	0.0653775758461448	0.254858874934459	III_3623259	3623259	III_5593439	5593439
I_11464112	I	11464112	A_12_P106650	10.7515474949044	3.14693214659393	1	0.189647043391725	-0.43533752201958	I_11376289	11376289	I_11575781	11575781
IV_4550944	IV	4550944	A_12_P106665	4.13314340693798	3.08644767739806	1	0.107355147800477	-0.326618980146085	IV_4356886	4356886	IV_5208413	5208413
X_4721441	X	4721441	A_12_P106673	3.94530970328324	3.07499174705334	1	0.103877615357115	-0.321285382520799	X_4536045	4536045	X_5576572	5576572
V_527643	V	527643	A_12_P106675	10.3940054895505	3.07761356172396	1	0.251307867531923	0.499727240508196	V_8249	8249	V_690972	690972
X_13262770	X	13262770	A_12_P106675	3.80308527532606	3.02378138613297	2	0.0443304936118667	0.209884933894606	X_12206293	12206293	X_13405267	13405267
X_4758185	X	4758185	A_12_P106682	4.21159399876763	2.95415938828716	1	0.113500343521757	0.335809593729798	X_4284268	4284268	X_5810100	5810100
IV_4693652	IV	4693652	A_12_P106686	48.9106745760667	3.16030768814416	1	0.724838187999176	-0.848692793216157	IV_4656772	4656772	IV_4750189	4750189
IV_15573322	IV	15573322	A_12_P106689	6.52150048414718	2.97110388631262	1	0.168516264297405	-0.409214385840177	IV_15398099	15398099	IV_15954820	15954820
V_3491728	V	3491728	A_12_P106698	17.8528619128734	2.97379311484229	1	0.397974763555444	-0.628865468618792	V_3427120	3427120	V_3655574	3655574
IV_13356132	IV	13356132	A_12_P106699	4.81277506611807	2.87616663316477	1	0.126898072347769	0.355105577629839	IV_13068189	13068189	IV_13871463	13871463
II_3542182	II	3542182	A_12_P106702	3.77980699058455	3.09283709014379	1	0.101132568887575	0.317011853083131	II_3412935	3412935	II_4134290	4134290
V_11833225	V	11833225	A_12_P106704	6.0141840629286	2.9564193913202	1	0.155253632895815	-0.392781357695441	V_11600826	11600826	V_12931140	12931140
IV_10327996	IV	10327996	A_12_P106711	45.7441927206529	3.14774718236906	1	0.680472546892884	-0.822242300924161	IV_10282788	10282788	IV_10434018	10434018
I_5289115	I	5289115	A_12_P106712	3.75818972925919	3.05291205087824	1	0.0598549810846981	-0.243882214732403	I_3667385	3667385	I_7805252	7805252
III_5111616	III	5111616	A_12_P106712	3.43763666867879	3.03979819551817	2	0.0821803352235162	-0.285768223862067	III_4189252	4189252	III_6329927	6329927
X_4322768	X	4322768	A_12_P106715	4.82167398469459	3.09020093658245	1	0.133066863570739	0.363581385220457	X_3934740	3934740	X_5341098	5341098
V_17568121	V	17568121	A_12_P106744	52.8795513449525	3.03790095480402	1	0.753652750137687	-0.865380145382878	V_17559376	17559376	V_17717410	17717410
IV_11863631	IV	11863631	A_12_P106744	3.98051403106542	2.95884608417885	2	0.05308247846596	-0.229666091124437	IV_9694906	9694906	IV_12574409	12574409
V_9985933	V	9985933	A_12_P106747	3.14144960038954	3.09218976596992	1	0.0844624227604893	0.289708841001528	V_9005254	9005254	V_10815911	10815911
I_14898607	I	14898607	A_12_P106748	14.2455403392249	3.09516311073586	1	0.350880860515305	-0.590069298449665	I_14838357	14838357	I_15058920	15058920
I_1451409	I	1451409	A_12_P106752	6.49517190025955	3.03835344374921	1	0.058606903656162	0.241326141927934	I_1419429	1419429	I_1516275	1516275
X_4758185	X	4758185	A_12_P106752	3.50422633084963	3.01139673421041	2	0.0956716485314636	-0.308334137017187	X_4175841	4175841	X_5569019	5569019
X_4893004	X	4893004	A_12_P106753	10.0146782202322	3.01179455751691	1	0.254051088148804	0.50237406323474	X_4753798	4753798	X_5341098	5341098
X_3843271	X	3843271	A_12_P106754	3.2939002633156	2.98979260430516	1	0.0887433278104875	-0.296959919304465	X_3713398	3713398	X_5638607	5638607
III_996547	III	996547	A_12_P106779	32.713869814454	3.00769154560456	1	0.606842605444239	-0.776547477804295	III_982777	982777	III_1063790	1063790
IV_8179349	IV	8179349	A_12_P106790	3.92116584848819	3.00323538604589	1	0.103277340970872	0.320355736558436	IV_4750189	4750189	IV_9672074	9672074
II_13446733	II	13446733	A_12_P106799	3.38078969249714	3.0017612258656	1	0.0901746217480098	0.299345094768853	II_13163270	13163270	II_13663523	13663523
IV_5002403	IV	5002403	A_12_P106807	3.38767262516309	3.2075660953083	1	0.0892135211820056	-0.298416047427192	IV_4656772	4656772	IV_7172090	7172090
X_10449274	X	10449274	A_12_P106814	6.40831117970483	2.96557868184221	1	0.199719029431531	0.445190360057109	X_8931681	8931681	X_10711645	10711645
V_19733784	V	19733784	A_12_P106816	45.2764888450596	3.10492252069727	1	0.706234406540104	-0.83767968992237	V_19726319	19726319	V_19749352	19749352
I_1706821	I	1706821	A_12_P106821	5.15480227359083	2.99109305892094	1	0.0357243109584622	-0.188413454289935	I_1699196	1699196	I_1745486	1745486
IV_12079110	IV	12079110	A_12_P106826	4.24499607949399	3.07136305682754	1	0.113270631225347	0.335497000460912	IV_9987122	9987122	IV_12644720	12644720
II_4905764	II	4905764	A_12_P106827	3.05140707771484	2.96579665034328	1	0.0831105478711254	-0.287381001499541	II_4119401	4119401	II_6850037	6850037
V_1038256	V	1038256	A_12_P106829	7.79148723956756	2.97783535300479	1	0.19702229536112	-0.442473910449002	V_708390	708390	V_1113279	1113279
II_14204646	II	14204646	A_12_P106829	3.40304476884598	2.95566182203827	2	0.10159012863474	0.317728181010289	II_13909294	13909294	II_14255058	14255058
X_5949176	X	5949176	A_12_P106829	3.04619332797376	3.0181207007178	3	0.0691290318416375	0.262095894772257	X_5334405	5334405	X_11600428	11600428
V_20017989	V	20017989	A_12_P106853	24.4350784503616	3.01249107571214	1	0.49469433307404	-0.701129836735227	V_20005738	20005738	V_20038134	20038134
X_4501238	X	4501238	A_12_P106854	3.00406342102341	2.87888632800198	1	0.0797404501371825	-0.281494116940601	X_3843271	3843271	X_5526747	5526747
X_5576572	X	5576572	A_12_P106864	4.52430131519585	2.97360108286861	1	0.119274790088191	0.344274068404356	X_5383095	5383095	X_8217033	8217033
X_10112699	X	10112699	A_12_P106867	14.8104318224331	3.0118489663549	1	0.350517617986496	0.590119928114627	X_9591109	9591109	X_10449274	10449274
V_2819206	V	2819206	A_12_P106882	11.606413349015	3.07887416751584	1	0.305361978076496	-0.552591753150523	V_2657849	2657849	V_3181885	3181885
X_12565734	X	12565734	A_12_P106892	8.9631925624671	3.05556647604747	1	0.22705342332359	-0.474981287184066	X_10711645	10711645	X_12932361	12932361
X_16515500	X	16515500	A_12_P106899	4.89061727481797	3.00896425649016	1	0.133020644573934	-0.363549100032385	X_15995509	15995509	X_17709225	17709225
III_3281674	III	3281674	A_12_P106904	38.7748252149698	3.18905493116515	1	0.665529152685294	-0.81318075491743	III_3275094	3275094	III_3303713	3303713
IV_7172090	IV	7172090	A_12_P106905	3.13304004245005	3.09386739145373	1	0.0911902717589911	-0.300955347641694	IV_6578183	6578183	IV_9995259	9995259
X_13485596	X	13485596	A_12_P106920	3.16152810802327	3.00709991429884	1	0.0853378844579364	-0.29120640137793	X_12932361	12932361	X_14142466	14142466
X_3843271	X	3843271	A_12_P106935	3.05873859213555	2.96139768900043	1	0.0826844721481626	-0.286643409171473	X_3713398	3713398	X_4566632	4566632
X_4322768	X	4322768	A_12_P106936	4.15027322987837	2.96096705443926	1	0.110461952143937	-0.331311368481629	X_3934740	3934740	X_5390152	5390152
V_15936590	V	15936590	A_12_P106938	3.57982338916825	3.02330890088271	1	0.0915758334248986	0.302250424057368	V_15266134	15266134	V_16778150	16778150
X_12565734	X	12565734	A_12_P106942	6.29206402491728	3.05449799453221	1	0.163691871919717	-0.403314224013102	X_12184364	12184364	X_12932361	12932361
V_19892946	V	19892946	A_12_P106949	6.58424801771797	3.01612685715467	1	0.165208135466452	-0.405177850566026	V_19868806	19868806	V_20268061	20268061
III_11987519	III	11987519	A_12_P106954	10.2419302803423	3.06610542308388	1	0.249286932054987	-0.49771386329398	III_11971503	11971503	III_12202569	12202569
IV_15399516	IV	15399516	A_12_P106956	3.72783741233939	2.93936427709875	1	0.108381718605198	0.328092102926056	IV_15378475	15378475	IV_16411900	16411900
X_4656473	X	4656473	A_12_P106959	3.67930770681416	3.02474910415231	1	0.0977207517278316	-0.311618606320314	X_4284268	4284268	X_5390152	5390152
X_4758185	X	4758185	A_12_P106960	18.5322737209644	3.14978470861999	1	0.401541148671202	0.631676921093231	X_4674201	4674201	X_5341098	5341098
I_2826770	I	2826770	A_12_P106965	3.41073468234766	2.51877716745133	1	0.0114598353887804	-0.10671345253703	I_2821831	2821831	I_2945651	2945651
I_2826770	I	2826770	A_12_P106965	2.65949103915837	2.48082165867019	2	0.0114598353887804	-0.10671345253703	I_2821831	2821831	I_3208761	3208761
IV_4761504	IV	4761504	A_12_P106971	6.83199894811026	3.06511837817492	1	0.174352726032324	0.416240517017461	IV_4644715	4644715	IV_5163110	5163110
V_7093878	V	7093878	A_12_P106971	3.27671573592959	3.17418794914483	2	0.0635201953852439	-0.251238327691179	V_5790711	5790711	V_10142996	10142996
V_13010814	V	13010814	A_12_P106972	3.17091872982907	3.06906946470202	1	0.0855799007343505	-0.291619036355571	V_12298716	12298716	V_14156647	14156647
II_1727040	II	1727040	A_12_P106973	5.21089292622783	2.92151266055615	1	0.121215827098863	0.347035717909088	II_1041078	1041078	II_1990551	1990551
V_12931140	V	12931140	A_12_P106978	4.94979429739714	2.95789997814627	1	0.132240722693606	0.362489206869435	V_12486434	12486434	V_13954172	13954172
III_4911067	III	4911067	A_12_P106979	14.7184363021815	3.08189428557228	1	0.338495831887537	0.579971488337549	III_4834284	4834284	III_5224162	5224162
I_614509	I	614509	A_12_P106984	3.83584786378038	3.11507127241468	1	0.0643850656746628	0.252942934581491	I_398834	398834	I_1185402	1185402
IV_4761504	IV	4761504	A_12_P106989	2.93207944444257	2.88116572007916	1	0.0790690761349988	-0.28030659347933	IV_3785505	3785505	IV_6109938	6109938
V_3908942	V	3908942	A_12_P106990	3.01981315143644	2.94168396373079	1	0.0822871196574171	-0.285953825998128	V_3877730	3877730	V_4165560	4165560
IV_8747453	IV	8747453	A_12_P106999	4.20859711482719	2.8791811143695	1	0.110396399438026	0.331213046935698	IV_7381956	7381956	IV_9672074	9672074
I_4214934	I	4214934	A_12_P107002	18.7386784688831	3.01909948366896	1	0.192860777662163	-0.439154817263787	I_3923864	3923864	I_4225559	4225559
I_4187461	I	4187461	A_12_P107002	7.23580691103157	2.99849649781868	2	0.198120347469028	-0.443630806175333	I_3894133	3894133	I_4225559	4225559
IV_3370426	IV	3370426	A_12_P107003	10.7761356967869	3.00494382963789	1	0.269162620199199	0.512766505656628	IV_3114992	3114992	IV_3407296	3407296
IV_4755912	IV	4755912	A_12_P107017	3.81980933023937	3.14847577504902	1	0.10022251100511	0.315582288392768	IV_3831026	3831026	IV_6109938	6109938
I_2963683	I	2963683	A_12_P107017	3.08852660372848	3.04595501595016	2	0.0234923893800581	-0.152789523539587	I_2862749	2862749	I_3208761	3208761
II_5249075	II	5249075	A_12_P107019	2.92323071417539	2.83478734205644	1	0.0800221199944963	-0.281990844214748	II_4739944	4739944	II_6548478	6548478
III_936500	III	936500	A_12_P107032	33.0107166222708	3.00935079922854	1	0.621292597065462	-0.788200116057752	III_904098	904098	III_939943	939943
II_14204646	II	14204646	A_12_P107035	3.23561979487159	2.92769302895575	1	0.0835089260969069	0.288068937452875	II_13909294	13909294	II_14255058	14255058
I_4855280	I	4855280	A_12_P107042	6.25885585953829	2.8869019444978	1	0.101695934525103	-0.317804007256604	I_4775095	4775095	I_4997003	4997003
X_7002637	X	7002637	A_12_P107043	3.28220373789974	2.87729886031683	1	0.0934240523089292	-0.304659486342722	X_6300921	6300921	X_8030746	8030746
X_6953360	X	6953360	A_12_P107064	3.18931719933553	3.04532180228915	1	0.0880642212762829	0.295821497273927	X_6366333	6366333	X_9994332	9994332
IV_4757132	IV	4757132	A_12_P107064	3.22607259731743	3.02080920643136	2	0.0714573700566065	-0.267136591705401	IV_3988400	3988400	IV_7641964	7641964
II_13446733	II	13446733	A_12_P107066	3.18143227877306	2.98859501151696	1	0.0870358020609817	0.294065096122206	II_13194469	13194469	II_13578819	13578819
IV_12672698	IV	12672698	A_12_P107075	6.41977271537426	3.09262621507959	1	0.168540693246195	-0.409244045633111	IV_12062878	12062878	IV_12896142	12896142
X_8948569	X	8948569	A_12_P107084	5.92142338419228	2.93210882103463	1	0.158288547545288	-0.396593899719853	X_8208528	8208528	X_10596631	10596631
II_9145624	II	9145624	A_12_P107089	2.83641125595675	2.80322735586643	1	0.0787151345785953	-0.279678513366879	II_6570733	6570733	II_9845678	9845678
V_1913716	V	1913716	A_12_P107095	5.21542305257242	2.97763683380785	1	0.140794736813304	0.374021665748278	V_708390	708390	V_2659191	2659191
IV_8696159	IV	8696159	A_12_P107104	6.93108801831163	3.05494556708159	1	0.174967161776491	0.416973307749286	IV_8044494	8044494	IV_8963101	8963101
I_398834	I	398834	A_12_P107108	19.6896225748493	2.97047255709868	1	0.284781434789288	0.531946933725709	I_398834	398834	I_614509	614509
I_398834	I	398834	A_12_P107108	3.1325364873985	3.0594565190578	2	0.284781434789288	0.531946933725709	I_398834	398834	I_1234526	1234526
X_4656473	X	4656473	A_12_P107110	3.744822636927	3.06785324743775	1	0.0993681674885572	-0.314234324128233	X_4175841	4175841	X_5526747	5526747
I_1288030	I	1288030	A_12_P107110	3.35654958223137	2.98515318901615	2	0.0405661184314174	0.200775958747789	I_1273893	1273893	I_1688137	1688137
IV_4761504	IV	4761504	A_12_P107113	4.59187281465713	3.0379780148894	1	0.120940388829583	-0.346669521956137	IV_4644715	4644715	IV_5646749	5646749
IV_7016150	IV	7016150	A_12_P107114	2.98541692213644	2.91879036728894	1	0.079266586152131	0.280656470019404	IV_6481596	6481596	IV_11565289	11565289
II_14229519	II	14229519	A_12_P107121	3.33003966752487	3.12952151868165	1	0.085830253532445	0.292045271519925	II_13669810	13669810	II_15274701	15274701
IV_15403721	IV	15403721	A_12_P107135	3.88289260320706	3.08405338408343	1	0.105421590432042	0.323664272914699	IV_15325632	15325632	IV_15619530	15619530
III_1954629	III	1954629	A_12_P107137	15.0350096901839	3.11883880564056	1	0.349947289851759	0.589664343498685	III_1946714	1946714	III_1984767	1984767
III_10465571	III	10465571	A_12_P107145	3.63998154629336	2.99689981829021	1	0.104399613413258	0.322044676793964	III_10146386	10146386	III_10716422	10716422
II_13443507	II	13443507	A_12_P107145	3.40784507347296	3.0362810804769	2	0.0835806019145218	-0.288150532766305	II_13163270	13163270	II_13842684	13842684
V_3778723	V	3778723	A_12_P107151	6.62221594754023	2.91630313715568	1	0.173693922758216	-0.415453376625674	V_3229784	3229784	V_3881987	3881987
X_14346521	X	14346521	A_12_P107159	47.0275804442702	3.24973842836339	1	0.779122832994869	-0.879587642918728	X_14281712	14281712	X_14477626	14477626
IV_4757132	IV	4757132	A_12_P107171	8.0858932957493	2.96552676850895	1	0.200153221847956	0.447378925860616	IV_4538310	4538310	IV_5163110	5163110
X_4758185	X	4758185	A_12_P107171	4.80321238322635	3.088210059236	2	0.105955162055009	-0.324482322150216	X_4536045	4536045	X_5361887	5361887
V_533022	V	533022	A_12_P107172	10.4698638641468	2.94780946301369	1	0.252878012779847	-0.501285931406931	V_532659	532659	V_533525	533525
II_12083801	II	12083801	A_12_P107172	3.85471760818837	3.12804811174259	2	0.0682332072414984	0.260392141919285	II_12035167	12035167	II_12204043	12204043
III_12731659	III	12731659	A_12_P107177	35.5927382087203	3.14859474687628	1	0.640229624861976	-0.797623359391981	III_12729776	12729776	III_12806910	12806910
V_13155451	V	13155451	A_12_P107179	6.94669590892722	3.05205304268478	1	0.176995346769348	-0.419383080831571	V_12486434	12486434	V_13332418	13332418
IV_13620522	IV	13620522	A_12_P107187	14.7732755410317	2.98862208048572	1	0.345364585306748	-0.585802706444791	IV_13526357	13526357	IV_13902731	13902731
III_12361892	III	12361892	A_12_P107187	6.17495905820842	2.98920667133326	2	0.134363464159589	0.366381897808768	III_12292760	12292760	III_12446786	12446786
V_3685467	V	3685467	A_12_P107190	12.946879207673	3.07963818736712	1	0.31836426030115	-0.562402844862634	V_3483432	3483432	V_3897200	3897200
V_18938530	V	18938530	A_12_P107190	5.36018494242815	3.09688829077832	2	0.0763714088221175	0.275455060913778	V_18884981	18884981	V_19159130	19159130
IV_15429132	IV	15429132	A_12_P107199	3.32532048765532	3.02379177615097	1	0.0902180194461863	0.299417117945604	IV_15393010	15393010	IV_15621314	15621314
X_14281712	X	14281712	A_12_P107201	12.4088323779787	3.06699291033092	1	0.310597333663664	0.555488330868634	X_13862341	13862341	X_14477626	14477626
I_2260201	I	2260201	A_12_P107202	3.63407395722528	2.85391102414435	1	0.00249752471943336	-0.0498178383392476	I_2250505	2250505	I_2382076	2382076
I_2260201	I	2260201	A_12_P107202	3.46334709279187	2.8575475551874	2	0.00249752471943336	-0.0498178383392476	I_2250505	2250505	I_2382076	2382076
I_2260201	I	2260201	A_12_P107202	3.30026305527052	3.0172325650454	3	0.00249752471943336	-0.0498178383392476	I_2250505	2250505	I_2382076	2382076
I_2260201	I	2260201	A_12_P107202	3.14451348914245	2.90860340527029	4	0.00249752471943336	-0.0498178383392476	I_2250505	2250505	I_2382076	2382076
I_2260201	I	2260201	A_12_P107202	2.99579948898146	2.93915239746946	5	0.00249752471943336	-0.0498178383392476	I_2250505	2250505	I_2382076	2382076
III_2438328	III	2438328	A_12_P107204	24.3444260342251	2.96361856714355	1	0.531699007542445	-0.726622895775054	III_2401865	2401865	III_2449975	2449975
X_3843271	X	3843271	A_12_P107205	4.01915783711766	2.94876123426886	1	0.107171536173765	-0.326339549173958	X_3713398	3713398	X_3991931	3991931
IV_1586020	IV	1586020	A_12_P107231	3.332869323542	2.89667982098449	1	0.0917234331877275	0.301904879472724	IV_1431180	1431180	IV_1762281	1762281
I_1623032	I	1623032	A_12_P107234	3.26886489379967	3.07395044912892	1	0.0308722526021335	0.17515161287133	I_1419429	1419429	I_1700575	1700575
X_3843271	X	3843271	A_12_P107246	3.40030070115668	2.95163648074579	1	0.0914711661362566	0.301489428974215	X_3136351	3136351	X_4402562	4402562
X_3796301	X	3796301	A_12_P107254	4.46460430351459	3.01686846567136	1	0.118760179122947	0.343530580527257	X_3184463	3184463	X_3907685	3907685
V_3551664	V	3551664	A_12_P107265	27.0532191137569	3.08831559978931	1	0.556072369073983	-0.743212768961098	V_3537594	3537594	V_3680651	3680651
IV_14974216	IV	14974216	A_12_P107265	3.0947820247921	2.95567150168292	2	0.041092543974468	0.20203611974423	IV_14376301	14376301	IV_15143459	15143459
X_4175841	X	4175841	A_12_P107271	3.31758806958023	2.99466542798616	1	0.089699247173864	-0.298555021671422	X_3814926	3814926	X_4862702	4862702
X_3843271	X	3843271	A_12_P107276	5.55334987504125	3.01278143317669	1	0.144901634363919	-0.379460542520805	X_3713398	3713398	X_3907685	3907685
II_733570	II	733570	A_12_P107285	6.22317763621748	3.03420915763154	1	0.14065770031345	-0.373862355271077	II_6368	6368	II_1324489	1324489
III_1580776	III	1580776	A_12_P107294	5.81391485042117	2.96448567268183	1	0.162303162730996	-0.401532448687116	III_1562285	1562285	III_1759358	1759358
V_13155451	V	13155451	A_12_P107304	3.28476379459828	3.06791116797825	1	0.0881353664345981	0.295940967008418	V_12486434	12486434	V_14156647	14156647
III_10465571	III	10465571	A_12_P107306	5.14939438268402	3.06078680190854	1	0.139345069304866	-0.372106353730329	III_9987327	9987327	III_11052616	11052616
IV_10327996	IV	10327996	A_12_P107309	4.18879686775231	2.98121869674129	1	0.106654036093953	0.325550696501687	IV_8966631	8966631	IV_12722332	12722332
X_11600428	X	11600428	A_12_P107311	9.14291997365326	3.01001259437865	1	0.240937091587648	-0.489225389477676	X_11382849	11382849	X_12859131	12859131
IV_3798053	IV	3798053	A_12_P107319	34.6148294732627	3.17445640236426	1	0.631033129652404	-0.791873959560921	IV_3785505	3785505	IV_3838447	3838447
X_8948569	X	8948569	A_12_P107321	9.60505242737892	3.05302269079735	1	0.242379646029019	0.490770053833287	X_8208528	8208528	X_9591109	9591109
V_1913716	V	1913716	A_12_P107324	26.8879335110124	3.06490905316874	1	0.534842388904674	0.729025788498055	V_1896745	1896745	V_2021759	2021759
X_4862702	X	4862702	A_12_P107324	4.66629531876842	3.03736276302236	2	0.046148420697776	0.214145228894242	X_4527431	4527431	X_5676445	5676445
III_10481103	III	10481103	A_12_P107327	13.7622445236328	2.95005922205139	1	0.328728175216817	-0.571542388993775	III_10418745	10418745	III_10595502	10595502
II_11936043	II	11936043	A_12_P107328	5.80364827018333	3.09266889003572	1	0.15089965958395	-0.387234560855766	II_11021792	11021792	II_12184321	12184321
V_5235073	V	5235073	A_12_P107335	5.03474259479566	2.93954457037431	1	0.136858772966301	0.367748959830452	V_5167653	5167653	V_5602246	5602246
V_10142996	V	10142996	A_12_P107338	4.44777576579725	3.06220737231975	1	0.120567417267445	0.346106288533586	V_10119315	10119315	V_12414380	12414380
II_4854419	II	4854419	A_12_P107339	3.12764052209811	2.9637422785652	1	0.0860260995642846	-0.292378273667755	II_4287737	4287737	II_5465868	5465868
IV_15712992	IV	15712992	A_12_P107346	7.8510038315882	3.01122839207239	1	0.200486631322928	-0.44634707248211	IV_15625988	15625988	IV_15954820	15954820
X_4862702	X	4862702	A_12_P107346	7.11818855381515	3.10080081307599	2	0.0938197619058744	0.305335390202708	X_4674201	4674201	X_5676445	5676445
V_3143425	V	3143425	A_12_P107346	9.37410590103186	3.02967556320939	3	0.14038099120729	0.373494433548241	V_2887755	2887755	V_3259189	3259189
X_3843271	X	3843271	A_12_P107349	3.10829531183704	3.00104778941327	1	0.0839647173144631	-0.288854006950489	X_3713398	3713398	X_4505845	4505845
II_13443507	II	13443507	A_12_P107350	4.13024003889954	3.11646827835183	1	0.109496200343099	0.329859886914171	II_13252286	13252286	II_13568408	13568408
V_1913716	V	1913716	A_12_P107351	8.36301560710636	3.00675727683176	1	0.21265804431507	0.459696173943449	V_1800608	1800608	V_2659191	2659191
X_5576572	X	5576572	A_12_P107382	3.01788427922323	2.98607464790233	1	0.0812833528979298	0.284204392721098	X_4630882	4630882	X_5810100	5810100
II_14216872	II	14216872	A_12_P107385	3.70044035007467	3.16259180946193	1	0.0934926288043471	0.304802599807814	II_13738578	13738578	II_14282734	14282734
V_5030874	V	5030874	A_12_P107386	17.5532012702475	3.03281347685059	1	0.369393835927749	-0.605863519495313	V_5027848	5027848	V_5094459	5094459
III_1361852	III	1361852	A_12_P107392	4.87001384210264	2.96306681681288	1	0.131550505833769	0.361556557348721	III_977162	977162	III_1559962	1559962
III_5224162	III	5224162	A_12_P107392	3.10876500480652	3.01631799345252	2	0.0519302280655495	-0.227164308062667	III_3411757	3411757	III_6994821	6994821
V_1113279	V	1113279	A_12_P107400	28.3631469558971	3.00164865307732	1	0.563349748283829	-0.748109433027843	V_1062760	1062760	V_1372698	1372698
V_11600826	V	11600826	A_12_P107404	4.21986325296123	3.04260583084298	1	0.115621755522138	-0.338832580793514	V_11050301	11050301	V_12132514	12132514
X_5569019	X	5569019	A_12_P107405	4.09508745731776	2.97081747519385	1	0.109078556221191	0.329230204516099	X_4630882	4630882	X_5949176	5949176
IV_4043433	IV	4043433	A_12_P107414	9.38191009538288	3.05021043845532	1	0.228645915462487	0.477950338245978	IV_3958558	3958558	IV_4295474	4295474
I_12052126	I	12052126	A_12_P107419	5.85957911161686	2.96361872660413	1	0.115583263451328	-0.338904595258729	I_11959037	11959037	I_12430088	12430088
X_5569019	X	5569019	A_12_P107427	5.12501686295639	3.03586233456525	1	0.138639756159707	-0.371132722894149	X_5383095	5383095	X_6159202	6159202
X_5341098	X	5341098	A_12_P107432	2.99463472571367	2.97950090261989	1	0.0799215099576699	-0.281813518042777	X_3713398	3713398	X_5676445	5676445
X_3843271	X	3843271	A_12_P107439	3.89010513327968	3.07805696896914	1	0.103920659446806	-0.321351941636707	X_3713398	3713398	X_4505845	4505845
IV_8179349	IV	8179349	A_12_P107441	5.58237740313591	2.98606246054592	1	0.143615307665971	0.377772506592598	IV_7630216	7630216	IV_8995270	8995270
X_3843271	X	3843271	A_12_P107441	3.61213391761267	3.00678530792638	2	0.0935643637029276	-0.304919511650696	X_2636716	2636716	X_3907685	3907685
II_13755276	II	13755276	A_12_P107450	4.052054548498	3.04465586717538	1	0.105965858679118	0.324498700671883	II_13669810	13669810	II_14391450	14391450
III_5111616	III	5111616	A_12_P107452	4.7652956178582	3.1030740674059	1	0.127164126835736	0.355470520001224	III_3639980	3639980	III_5503798	5503798
IV_15480399	IV	15480399	A_12_P107452	3.13020559390256	3.05527254967178	2	0.0884990878731802	-0.296545050648053	IV_15393010	15393010	IV_15961314	15961314
IV_1503573	IV	1503573	A_12_P107458	8.61509587468314	3.03853984454122	1	0.22762358943081	0.475537436541201	IV_1429005	1429005	IV_1637815	1637815
X_4721441	X	4721441	A_12_P107459	3.78760106752559	3.05678147796655	1	0.0999490039298449	-0.315151382421585	X_3907685	3907685	X_5638607	5638607
II_14071163	II	14071163	A_12_P107459	3.01181366559904	3.00748466275148	2	0.0744013336865885	-0.271906970801266	II_13894030	13894030	II_15274701	15274701
X_14346521	X	14346521	A_12_P107461	3.53374755952429	2.74753904019225	1	0.0969739503328909	-0.310425597002234	X_13673477	13673477	X_14537770	14537770
II_733570	II	733570	A_12_P107465	37.3500545353109	2.99503851406391	1	0.602364930266158	0.773495246884911	II_719430	719430	II_916957	916957
II_5429933	II	5429933	A_12_P107465	3.22353101419346	2.79836525007004	2	0.0806678751896651	0.283059749839012	II_4739944	4739944	II_6548478	6548478
I_10819782	I	10819782	A_12_P107467	4.15642497320604	2.99903924076301	1	0.100965495726803	-0.316637716182285	I_9523381	9523381	I_11388363	11388363
I_1041272	I	1041272	A_12_P107483	3.53473433916554	3.09763638149544	1	0.0481611046361015	0.218765181431926	I_628622	628622	I_1187276	1187276
V_2486919	V	2486919	A_12_P107487	19.4651542733282	3.02514713235569	1	0.430517472443439	-0.654071720367152	V_2302115	2302115	V_2671879	2671879
III_11987519	III	11987519	A_12_P107509	4.05207047086219	3.03962594102097	1	0.107543129847785	-0.326904814834456	III_11767486	11767486	III_12216028	12216028
IV_8127338	IV	8127338	A_12_P107516	3.18624191905368	2.98985205878572	1	0.0990896018425378	-0.313625575852783	IV_7381956	7381956	IV_9995259	9995259
X_11847730	X	11847730	A_12_P107549	3.9158997327775	3.05379422668595	1	0.105691086076511	-0.324077710225046	X_10711645	10711645	X_12932361	12932361
IV_12079110	IV	12079110	A_12_P107552	3.05253797980827	3.00121571900198	1	0.0828454705807993	0.286922341209817	IV_11846956	11846956	IV_12722332	12722332
IV_4844241	IV	4844241	A_12_P107560	2.98863080428496	2.97564158315796	1	0.0797681110447737	-0.281542936000511	IV_4566633	4566633	IV_7172090	7172090
X_5569019	X	5569019	A_12_P107573	5.22960976414657	2.95197794876464	1	0.137078916292544	0.369075581342812	X_4891523	4891523	X_5676445	5676445
II_4905764	II	4905764	A_12_P107580	2.97680410985815	2.90798226405999	1	0.0811649691200359	0.283997354945669	II_4364919	4364919	II_5839860	5839860
X_6953360	X	6953360	A_12_P107587	4.33155644918283	2.9972690277222	1	0.117677178542467	0.341960627121485	X_6300921	6300921	X_7838301	7838301
X_4862702	X	4862702	A_12_P107592	5.16820405101866	3.0816834576894	1	0.137015062698114	-0.36895169670131	X_4536045	4536045	X_5390152	5390152
V_3491728	V	3491728	A_12_P107593	3.96995574036275	2.92867273098128	1	0.107067819275636	-0.326181600898132	V_2887755	2887755	V_3897200	3897200
IV_16382208	IV	16382208	A_12_P107598	6.21215971278691	3.03531467159997	1	0.14772548950426	0.383140181102559	IV_16205584	16205584	IV_17490756	17490756
IV_15758388	IV	15758388	A_12_P107600	6.93750629568444	3.06311331328561	1	0.177532781629705	-0.420019312954388	IV_15678791	15678791	IV_16205584	16205584
X_3572913	X	3572913	A_12_P107600	3.2511943124954	3.09224624086328	2	0.0471924314750791	0.216553974172613	X_2949804	2949804	X_3843271	3843271
III_3572217	III	3572217	A_12_P107600	3.15988817504999	2.97015591243103	3	0.0590377570561975	0.242834246256158	III_3324989	3324989	III_9993581	9993581
IV_9987122	IV	9987122	A_12_P107601	14.9346250857077	3.00918552826049	1	0.330025220598174	-0.572668831245378	IV_8811605	8811605	IV_9995259	9995259
X_4175841	X	4175841	A_12_P107609	3.25204947296867	3.10226166412324	1	0.0970794371847994	-0.310499474757856	X_2863701	2863701	X_5676445	5676445
II_6366860	II	6366860	A_12_P107611	5.06420522185401	3.18200436712327	1	0.135773538089292	0.36731405699495	II_5196296	5196296	II_6697935	6697935
X_4893004	X	4893004	A_12_P107617	7.05596388577337	3.15612225976228	1	0.177808531555266	0.420345380495581	X_4165450	4165450	X_5291269	5291269
X_12236381	X	12236381	A_12_P107617	7.31070108143657	3.01268029416697	2	0.0634381374801637	-0.251075995434516	X_11827052	11827052	X_12932361	12932361
III_10230593	III	10230593	A_12_P107618	14.0920525926423	2.98772023812619	1	0.334473204427168	0.57651504695704	III_10009386	10009386	III_10293762	10293762
V_3655574	V	3655574	A_12_P107619	5.32508319151997	3.11435150721949	1	0.141971537880655	-0.375604359834505	V_3282813	3282813	V_3680651	3680651
II_3525146	II	3525146	A_12_P107620	3.26475559930681	2.74773440472704	1	0.103769916312518	0.320929141637179	II_3375018	3375018	II_4120191	4120191
II_10239809	II	10239809	A_12_P107635	4.16323418487762	3.13678298302362	1	0.111613301805836	0.333033528873937	II_9845678	9845678	II_11508627	11508627
II_14212376	II	14212376	A_12_P107647	3.6891453947236	3.05019486809421	1	0.0939277341437434	-0.305511036915903	II_13909294	13909294	II_15274701	15274701
III_12135744	III	12135744	A_12_P107657	6.34711494609634	2.90837710596209	1	0.163774280225252	-0.40341573259554	III_11984213	11984213	III_12216028	12216028
IV_4391814	IV	4391814	A_12_P107658	4.3621022650825	3.1318012587402	1	0.134914429305225	0.365944071084945	IV_4043433	4043433	IV_4757132	4757132
III_8659106	III	8659106	A_12_P107663	4.14283239704169	2.987375586295	1	0.112708629607609	-0.334663667436279	III_4834284	4834284	III_9174716	9174716
II_4120191	II	4120191	A_12_P107665	4.51196814023096	3.02872865172359	1	0.133875043460007	-0.364580297259161	II_3861010	3861010	II_4678773	4678773
V_5175241	V	5175241	A_12_P107687	6.59269286566712	3.21622976599081	1	0.164410350303354	0.404198370782164	V_5027848	5027848	V_5237566	5237566
V_1436415	V	1436415	A_12_P107692	4.05966361675806	2.94085505264501	1	0.109663738553203	0.330112146861788	V_1361176	1361176	V_2283377	2283377
X_4179483	X	4179483	A_12_P107701	7.4510301301738	3.1641664933314	1	0.203612381484645	0.449717528493623	X_3946591	3946591	X_4566632	4566632
II_4678773	II	4678773	A_12_P107710	6.57433883797982	3.16372061588875	1	0.173505689965521	-0.415202931112249	II_4328160	4328160	II_4905764	4905764
V_5045041	V	5045041	A_12_P107712	3.08623243586349	3.05537964221471	1	0.080364396725207	0.282593277110082	V_4959381	4959381	V_5269306	5269306
X_12844501	X	12844501	A_12_P107717	5.51898515371792	3.14207633697106	1	0.149253758440065	-0.386307584482362	X_11570896	11570896	X_13024411	13024411
I_9729023	I	9729023	A_12_P107718	5.48504000222475	2.9724070545298	1	0.146291742246067	0.3810618056312	I_9000872	9000872	I_10826560	10826560
X_3863779	X	3863779	A_12_P107721	3.50065999557147	3.00659304842286	1	0.0935027681627094	0.304813022180473	X_3814926	3814926	X_4566632	4566632
IV_8778092	IV	8778092	A_12_P107723	3.30599411614161	3.20558344784275	1	0.0873779082159124	0.294666526133118	IV_7730646	7730646	IV_10434018	10434018
I_1623032	I	1623032	A_12_P107725	3.79667894839684	3.12807896909723	1	0.0355887092898083	0.188055526187068	I_1041272	1041272	I_1688137	1688137
V_13010814	V	13010814	A_12_P107727	3.11346309887059	3.10806549881202	1	0.0840981158264038	-0.289083373542897	V_11806498	11806498	V_14156647	14156647
I_1169919	I	1169919	A_12_P107733	3.2088644847163	2.9481128824446	1	0.0390377907056397	0.196957533517705	I_854751	854751	I_1600696	1600696
I_14755839	I	14755839	A_12_P107760	10.7189181718521	3.0262196858419	1	0.258008844042258	0.506345876758088	I_14683220	14683220	I_14863715	14863715
X_3863779	X	3863779	A_12_P107760	5.2217644887563	3.05323985572991	2	0.100346445624632	-0.315777351790344	X_3814926	3814926	X_5361887	5361887
II_4858788	II	4858788	A_12_P107760	3.1920201781171	3.14308690115493	3	0.0822982681072174	-0.285973196185817	II_4209585	4209585	II_6548478	6548478
X_4455978	X	4455978	A_12_P107764	10.6601947758578	2.97245646262814	1	0.271114581089207	0.518959651887593	X_3946591	3946591	X_4656473	4656473
III_2754104	III	2754104	A_12_P107764	3.33632251031879	3.13766561681939	2	0.0549187998082398	0.233570330194693	III_2702329	2702329	III_3004733	3004733
IV_13276861	IV	13276861	A_12_P107764	3.70311816191566	3.09285150587812	3	0.0600833373493319	0.244306026231402	IV_12697226	12697226	IV_14378834	14378834
X_4862702	X	4862702	A_12_P107783	4.70830396535681	3.0194261727689	1	0.128784774561827	0.357659680724254	X_4483054	4483054	X_5676445	5676445
IV_16529740	IV	16529740	A_12_P107793	21.7378794490377	2.98271728407726	1	0.439087642952151	-0.660549835704549	IV_16488050	16488050	IV_17490756	17490756
IV_4576321	IV	4576321	A_12_P107793	4.47412600650599	3.06714950431261	2	0.102261164798412	-0.318775803376838	IV_4366670	4366670	IV_5023053	5023053
V_10176051	V	10176051	A_12_P107806	3.6786693755025	3.0226214621746	1	0.098568196215783	0.312966883956465	V_8602178	8602178	V_12609412	12609412
V_18653678	V	18653678	A_12_P107827	3.93588332850664	3.14788761241472	1	0.118958325347775	0.343669351301309	V_18269611	18269611	V_18936661	18936661
IV_8747453	IV	8747453	A_12_P107827	3.34481428378533	3.05729198950337	2	0.0540732604527183	-0.231704602625964	IV_8044494	8044494	IV_12062878	12062878
V_15635975	V	15635975	A_12_P107828	5.84852140156149	3.03169935025816	1	0.149469699630078	0.385387712405216	V_14290317	14290317	V_15963459	15963459
II_4120191	II	4120191	A_12_P107832	46.933029965199	3.15834781557197	1	0.732758249661496	-0.853229206725337	II_4119401	4119401	II_4134290	4134290
I_4259878	I	4259878	A_12_P107835	16.1908096685602	2.99824773018259	1	0.200421144108733	-0.446265230389822	I_4256443	4256443	I_4702300	4702300
I_3894133	I	3894133	A_12_P107835	4.62455128236774	3.03126253303851	2	0.130550581414223	-0.360172614049988	I_3667385	3667385	I_4036507	4036507
I_11855563	I	11855563	A_12_P107840	6.41540509713874	2.96002067943298	1	0.130397594016897	-0.361105172487277	I_11796358	11796358	I_11943121	11943121
I_1516275	I	1516275	A_12_P107845	2.91402388807607	2.71667892228914	1	0.0292998319600875	0.170632811286055	I_1508520	1508520	I_1549969	1549969
V_7666834	V	7666834	A_12_P107851	4.1096010259211	3.05757792703163	1	0.103384718846208	-0.320509309462741	V_6789374	6789374	V_8585263	8585263
IV_15573322	IV	15573322	A_12_P107851	3.17213480349011	2.90696040666707	2	0.0579152919030853	0.239888317125932	IV_15442610	15442610	IV_15983752	15983752
X_4167697	X	4167697	A_12_P107853	3.47520846904638	3.06268078983384	1	0.0970392767880935	0.310498231257675	X_3154731	3154731	X_5810100	5810100
II_14608351	II	14608351	A_12_P107854	37.8541419758728	3.0905117707949	1	0.685873370460533	0.825372092410686	II_14606333	14606333	II_15274701	15274701
V_5175241	V	5175241	A_12_P107854	3.16608011039791	3.11738421109748	2	0.0105423422459661	0.102328442789694	V_4884376	4884376	V_5521051	5521051
I_4259878	I	4259878	A_12_P107885	20.7514437483471	3.17596483465514	1	0.247168227357092	-0.495594300011514	I_4256443	4256443	I_4702300	4702300
I_6651082	I	6651082	A_12_P107885	5.73751314195612	3.0510037884479	2	0.248422517331661	-0.496850190260887	I_4207054	4207054	I_7357149	7357149
II_14204646	II	14204646	A_12_P107886	3.30703167812899	3.09513555684801	1	0.0852651833333897	0.29108233254307	II_14070545	14070545	II_14255896	14255896
X_3725790	X	3725790	A_12_P107888	3.26404497902686	2.94694362337782	1	0.087976402238939	-0.295673961540467	X_2932540	2932540	X_5810100	5810100
X_3843271	X	3843271	A_12_P107894	3.15880904189802	2.98757458981694	1	0.0852677960566036	-0.291086792228206	X_3713398	3713398	X_4566632	4566632
X_3843271	X	3843271	A_12_P107899	3.77302272134388	3.12317860860039	1	0.100960786776805	0.316742503107909	X_3184463	3184463	X_3907685	3907685
V_5281983	V	5281983	A_12_P107909	3.15477857926937	2.95799236200996	1	0.0840033218879195	0.288920402721494	V_5149493	5149493	V_7647965	7647965
IV_13902731	IV	13902731	A_12_P107925	15.968414307142	3.04963146115722	1	0.356215864142105	-0.59495841266033	IV_13712159	13712159	IV_14237700	14237700
IV_3798053	IV	3798053	A_12_P107926	31.4471600157344	3.11401072731327	1	0.595888189703123	-0.769506637553947	IV_3792388	3792388	IV_3837377	3837377
II_3863103	II	3863103	A_12_P107935	3.58381561647668	2.97059254409158	1	0.0968739011496817	0.310265420778936	II_3373968	3373968	II_5061727	5061727
V_18416620	V	18416620	A_12_P107936	15.4749069072679	2.89547504626447	1	0.355670138769093	-0.594453944988607	V_18269611	18269611	V_18436998	18436998
X_4958735	X	4958735	A_12_P107939	3.3344699044541	3.05658284434289	1	0.088546015192261	0.296617645858011	X_4165450	4165450	X_5676445	5676445
III_10736515	III	10736515	A_12_P107960	39.4820663783032	3.11915930472257	1	0.696570480699051	0.831858028853564	III_10729384	10729384	III_10871365	10871365
V_2486919	V	2486919	A_12_P107968	3.8545437013595	2.97330958836785	1	0.128353910535389	-0.356862922715895	V_8249	8249	V_3282002	3282002
V_3090905	V	3090905	A_12_P107969	3.76396693529018	3.10064168873222	1	0.101810000793823	0.318071825730324	V_2659191	2659191	V_3181885	3181885
I_9631422	I	9631422	A_12_P107969	3.43349348792474	3.02016255274649	2	0.0752229001532479	-0.27340409680962	I_8852890	8852890	I_10676576	10676576
X_3247588	X	3247588	A_12_P107973	3.1523331995305	3.0151633753273	1	0.0854321949265636	-0.291367269137269	X_2594676	2594676	X_4402562	4402562
II_1990551	II	1990551	A_12_P107979	38.8134980334862	3.04751337011865	1	0.524873291421492	0.722199557974344	II_1988126	1988126	II_2133052	2133052
II_2133052	II	2133052	A_12_P107979	4.80465484476107	3.04882240240282	2	0.525625981159861	0.722717204291542	II_1988126	1988126	II_2344110	2344110
X_3843271	X	3843271	A_12_P107983	3.89216308720564	2.96065234442232	1	0.103972595327097	-0.321432231789557	X_3594656	3594656	X_3940409	3940409
X_3843271	X	3843271	A_12_P107988	3.76792630342134	2.97012549358879	1	0.100831719955238	-0.316539978824972	X_3713398	3713398	X_4402562	4402562
V_9985933	V	9985933	A_12_P107988	3.01715904335384	2.97370343772644	2	0.0522083143808207	0.227771728277073	V_9005254	9005254	V_12279420	12279420
X_8465070	X	8465070	A_12_P107993	4.04225903373397	2.92054966807328	1	0.109954772795718	-0.330549895392772	X_7931943	7931943	X_8948569	8948569
I_3458329	I	3458329	A_12_P107999	4.11832889538634	2.83428428513172	1	0.0407049608361412	0.201119255152625	I_3358592	3358592	I_3704521	3704521
V_12112105	V	12112105	A_12_P108012	3.98205181401142	3.03201956455577	1	0.105307365091892	-0.323488878664501	V_11591667	11591667	V_12279420	12279420
V_3091058	V	3091058	A_12_P108017	9.20759643231639	3.03982596928748	1	0.231124031700822	0.480734192941814	V_2659191	2659191	V_3174175	3174175
X_5526747	X	5526747	A_12_P108025	3.27288928727879	2.98444134482179	1	0.0878316182525377	0.29543056398711	X_4171941	4171941	X_7802067	7802067
V_537511	V	537511	A_12_P108027	4.64416774376145	2.97534228009027	1	0.121669623653648	-0.347713108603659	V_8249	8249	V_544961	544961
V_15497715	V	15497715	A_12_P108028	3.63152771906927	2.98944467507609	1	0.10928774927356	0.329404193192854	V_14190003	14190003	V_15834708	15834708
V_20135102	V	20135102	A_12_P108030	4.46300225971021	3.02354343092793	1	0.117223785269094	-0.341301228767152	V_20005738	20005738	V_20485981	20485981
IV_787345	IV	787345	A_12_P108030	4.47283351354806	3.03471456876009	2	0.115023911204427	0.338083555322116	IV_122764	122764	IV_963940	963940
II_343260	II	343260	A_12_P108031	2.96667298526571	2.8574272825827	1	0.0717551676213027	0.26702785858203	II_6368	6368	II_1732850	1732850
II_1990551	II	1990551	A_12_P108039	17.8375428629932	3.15866095946161	1	0.313702446846341	-0.558327390947756	II_1937117	1937117	II_2126849	2126849
IV_4391814	IV	4391814	A_12_P108039	3.52324550559109	2.90413455854908	2	0.0821121885626573	-0.285649715042345	IV_3958558	3958558	IV_5697478	5697478
V_13010814	V	13010814	A_12_P108056	3.06875764826917	2.94721371290401	1	0.0829434520321125	-0.287091962794316	V_10820753	10820753	V_13954172	13954172
X_5291269	X	5291269	A_12_P108061	6.74105390954405	3.02073820225947	1	0.170121255188629	0.411150262536263	X_4504557	4504557	X_5576572	5576572
II_7659303	II	7659303	A_12_P108063	5.24299708433951	2.97815840918973	1	0.139945071220494	0.372914083321965	II_6654199	6654199	II_9145624	9145624
V_15348506	V	15348506	A_12_P108066	3.53755828647347	3.08444124329236	1	0.0945770899081718	-0.306565271097919	V_13760316	13760316	V_15791213	15791213
IV_15619530	IV	15619530	A_12_P108068	3.73155271016191	2.93870501836714	1	0.0994885806001117	0.314424659110437	IV_15415673	15415673	IV_15983752	15983752
V_5235073	V	5235073	A_12_P108068	3.30522227825563	3.10254656280359	2	0.0692218344680654	-0.262989378685877	V_4792309	4792309	V_5281983	5281983
X_5810100	X	5810100	A_12_P108069	4.34767584640072	2.87223628960539	1	0.135444421916633	0.366672206540936	X_5638607	5638607	X_6255438	6255438
V_2271007	V	2271007	A_12_P108071	21.6266486118869	2.99629902788119	1	0.466917229279567	-0.681147602904359	V_2014608	2014608	V_2271884	2271884
I_1451409	I	1451409	A_12_P108072	3.17159827144138	2.95014224227271	1	0.0285222861001562	0.168350127122179	I_1345627	1345627	I_1688137	1688137
X_16039643	X	16039643	A_12_P108074	26.858540249337	2.96902105796634	1	0.548993296747567	-0.738499491362485	X_15995509	15995509	X_16404929	16404929
IV_17490756	IV	17490756	A_12_P108078	5.48061330637663	3.03420597614713	1	0.143525810438505	-0.379689543207983	IV_16488050	16488050	IV_17490756	17490756
II_5465868	II	5465868	A_12_P108090	4.97625408831235	3.05828281022491	1	0.135444060220359	-0.366830414954665	II_4844188	4844188	II_6645387	6645387
V_13010814	V	13010814	A_12_P108099	3.24963839428046	3.05732139657169	1	0.0876060871467032	-0.295051021802222	V_12298716	12298716	V_13760316	13760316
III_11393662	III	11393662	A_12_P108102	12.970135300776	3.14529225867353	1	0.296204861987759	0.542532891470608	III_11293304	11293304	III_11419577	11419577
V_1913716	V	1913716	A_12_P108110	5.16751755599648	3.04430658975144	1	0.144591353710238	0.378982072599971	V_1792116	1792116	V_2021759	2021759
V_5237566	V	5237566	A_12_P108115	4.08414977197166	3.00399359502476	1	0.107321378307286	0.326567605688665	V_5149493	5149493	V_5602686	5602686
IV_2759710	IV	2759710	A_12_P108119	4.51160534547216	3.01145271966156	1	0.12210122352073	-0.348329285730226	IV_2300389	2300389	IV_2970233	2970233
IV_8747453	IV	8747453	A_12_P108119	3.68629843524511	3.04556522752752	2	0.0746028705783255	0.272274989917246	IV_7630216	7630216	IV_9672074	9672074
X_14142466	X	14142466	A_12_P108119	3.57980842986789	3.02830490673381	3	0.0756277858539223	-0.274138905305341	X_13708374	13708374	X_14537770	14537770
II_3419553	II	3419553	A_12_P108127	4.35802390782289	3.05501323388366	1	0.113473644387821	-0.335797518853849	II_3246908	3246908	II_3576221	3576221
X_4656473	X	4656473	A_12_P108130	3.89242830326742	3.10735014195586	1	0.103068373024672	-0.320031473863916	X_4171941	4171941	X_5676445	5676445
V_2659191	V	2659191	A_12_P108135	8.12961819813401	3.03794010936844	1	0.21085436880191	-0.457352463977168	V_2486879	2486879	V_3174175	3174175
V_5045041	V	5045041	A_12_P108147	5.45077520836164	3.0109097216524	1	0.137255049747176	0.3693126188483	V_4964433	4964433	V_5107998	5107998
III_9785498	III	9785498	A_12_P108150	6.37958496250783	3.10794186735973	1	0.168541076917924	0.409244511441333	III_9692506	9692506	III_10230593	10230593
IV_16529740	IV	16529740	A_12_P108151	20.4463478737918	3.0767445116864	1	0.420001354159404	0.64603392806316	IV_16488050	16488050	IV_17490756	17490756
III_3118490	III	3118490	A_12_P108151	3.16096313312112	3.06493692707738	2	0.0436443329966018	0.208254268470651	III_2822390	2822390	III_3326662	3326662
III_1488833	III	1488833	A_12_P108152	6.22782156322239	3.05372733633541	1	0.16503933268576	-0.404970800751512	III_1389211	1389211	III_1633618	1633618
V_529501	V	529501	A_12_P108170	3.43583336312515	3.00854683943457	1	0.0915709615041516	-0.301653847161395	V_8249	8249	V_1977814	1977814
II_13108701	II	13108701	A_12_P108172	3.25223048846076	3.0531264779978	1	0.0839177629114113	0.288773229782493	II_13032668	13032668	II_13421195	13421195
X_4656473	X	4656473	A_12_P108173	3.9384668059613	2.99833984645041	1	0.10504353591006	-0.323076931092735	X_3713398	3713398	X_5390152	5390152
II_13755276	II	13755276	A_12_P108176	9.00375249502668	2.9724999327197	1	0.219660599015682	0.467203473675363	II_13735025	13735025	II_14012154	14012154
X_4322768	X	4322768	A_12_P108183	3.11318592526579	3.00688211895588	1	0.103865568124956	0.32102043295401	X_3907685	3907685	X_4958735	4958735
I_12318658	I	12318658	A_12_P108186	4.61462378440734	3.07629238232058	1	0.0957672200637197	-0.308488104314527	I_12098639	12098639	I_12597637	12597637
IV_4761504	IV	4761504	A_12_P108186	3.46081708827668	3.03060889050913	2	0.0730977006677682	0.269514316319754	IV_4208432	4208432	IV_6109938	6109938
V_13228106	V	13228106	A_12_P108188	5.32096775130755	3.00253321193693	1	0.137395656320495	-0.369501735714242	V_12437962	12437962	V_14156647	14156647
II_14255896	II	14255896	A_12_P108195	15.6714158168738	3.01978645170455	1	0.349135225290493	0.589015624804222	II_14218855	14218855	II_14281777	14281777
X_3843271	X	3843271	A_12_P108195	3.37625819568724	3.01171744207433	2	0.069352521251471	-0.26251922191057	X_3713398	3713398	X_5291269	5291269
III_8009505	III	8009505	A_12_P108196	4.24694452894453	3.07870538503543	1	0.11441825718358	0.337192297514608	III_6862755	6862755	III_9210994	9210994
III_1402564	III	1402564	A_12_P108198	20.7290764949034	3.07999538608452	1	0.457696248162051	-0.674360658589542	III_1393407	1393407	III_1464277	1464277
IV_17489193	IV	17489193	A_12_P108199	4.03770851092697	2.98048733825982	1	0.102633745256102	-0.3205659396116	IV_16488050	16488050	IV_17490756	17490756
II_4120191	II	4120191	A_12_P108203	4.04125209831954	2.99031850984771	1	0.108530812035509	-0.328402540051102	II_3509075	3509075	II_4411217	4411217
I_1934140	I	1934140	A_12_P108207	2.9547726259104	2.87403819093997	1	0.0141460698266947	0.118557865496603	I_1933463	1933463	I_2032213	2032213
I_9729023	I	9729023	A_12_P108210	36.295267537477	3.27464661774527	1	0.548368693638167	-0.738186855701014	I_9701366	9701366	I_9941265	9941265
III_10465571	III	10465571	A_12_P108215	2.57447044187622	2.52172376947036	1	0.078477588524301	-0.279170850512473	III_9130830	9130830	III_10969838	10969838
X_5361887	X	5361887	A_12_P108216	3.30906004129768	2.99624303376384	1	0.087917845490575	0.295575545446686	X_4674201	4674201	X_5993800	5993800
V_16167823	V	16167823	A_12_P108217	26.1378058141809	3.15277996373507	1	0.509135325806862	0.711186157974813	V_16167354	16167354	V_16188475	16188475
V_7343918	V	7343918	A_12_P108221	3.93283993576076	3.07804866351362	1	0.0972110817308733	0.310766335344761	V_5602246	5602246	V_8947708	8947708
IV_15525171	IV	15525171	A_12_P108245	3.17061640136757	3.10745800419481	1	0.0855721101129766	0.291605762530847	IV_15378475	15378475	IV_15881855	15881855
II_13374408	II	13374408	A_12_P108246	35.3484478829842	2.97398246324068	1	0.619157332782502	-0.768163982288251	II_13372003	13372003	II_13374590	13374590
X_3843271	X	3843271	A_12_P108248	3.26695348036891	2.93781361461632	1	0.0880511452757775	-0.295799534292871	X_3713398	3713398	X_4566632	4566632
X_3843271	X	3843271	A_12_P108276	3.2673340910022	3.03211850929394	1	0.0880609257902876	-0.295815962195619	X_3594656	3594656	X_3907685	3907685
X_4893004	X	4893004	A_12_P108287	6.38021693316228	2.98941868872079	1	0.162309497674484	0.401607623463128	X_4165450	4165450	X_5676445	5676445
IV_8778092	IV	8778092	A_12_P108291	3.80895612421374	3.14606224895205	1	0.0999531687590944	0.315157948460118	IV_7381956	7381956	IV_9672074	9672074
X_3843271	X	3843271	A_12_P108291	3.54765516431816	3.0252377544213	2	0.0832151287114582	-0.287561755318884	X_2636716	2636716	X_4402562	4402562
X_3843271	X	3843271	A_12_P108294	3.25042149342189	3.01883273908081	1	0.0876262203463805	-0.295084923441228	X_3713398	3713398	X_5526747	5526747
I_2260201	I	2260201	A_12_P108294	3.16340940218579	2.93080542427303	2	0.00172188030477793	-0.0413648506451894	I_2250505	2250505	I_2284272	2284272
I_2260201	I	2260201	A_12_P108294	3.01384021410391	2.98222687522736	3	0.00172188030477793	-0.0413648506451894	I_2250505	2250505	I_2284272	2284272
II_4797215	II	4797215	A_12_P108295	4.72846951878076	2.94435659540238	1	0.127375554189101	-0.355773031685517	II_4119401	4119401	II_5249075	5249075
V_1616055	V	1616055	A_12_P108297	38.4837264455794	3.16974827442888	1	0.684727217134559	-0.824500528833827	V_1615139	1615139	V_1717227	1717227
V_10176051	V	10176051	A_12_P108299	3.37623280562031	3.03205377862382	1	0.0908548616177752	0.30047204095184	V_9889822	9889822	V_10815911	10815911
V_12609412	V	12609412	A_12_P108300	3.4372303416032	2.57866541398725	1	0.0924159852987215	0.303042493203148	V_11806498	11806498	V_13299544	13299544
II_4797215	II	4797215	A_12_P108300	2.9461480549136	2.560928278502	2	0.0744502172314046	-0.271996280988286	II_3570582	3570582	II_7161299	7161299
V_8585263	V	8585263	A_12_P108306	4.11282766371529	3.04829692782233	1	0.106858270685625	0.325862250176539	V_5709334	5709334	V_9985933	9985933
X_4656473	X	4656473	A_12_P108306	3.50618879722034	2.96452272090434	2	0.0959382240438034	0.308763402926778	X_4483054	4483054	X_5569019	5569019
II_14608351	II	14608351	A_12_P108306	2.90771516479782	2.9018849757013	3	0.0659157005357007	0.255931897936518	II_13882420	13882420	II_15274701	15274701
III_4664	III	4664	A_12_P108308	31.6566381521431	2.95789324143511	1	0.599996574100244	0.774581895519874	III_4664	4664	III_29436	29436
III_6224347	III	6224347	A_12_P108309	9.17829148977265	3.10788823014592	1	0.230959692234706	0.479049696161523	III_5617374	5617374	III_6994821	6994821
X_5291269	X	5291269	A_12_P108311	5.81731155376762	3.08180158417929	1	0.148379918601948	0.383987905495363	X_4483054	4483054	X_5810100	5810100
III_5224162	III	5224162	A_12_P108311	3.63556102921224	3.02547833039119	2	0.0710876766571224	0.265782964749629	III_3639980	3639980	III_6059408	6059408
IV_4761504	IV	4761504	A_12_P108313	5.78852750260812	3.01449156597543	1	0.149903568205014	0.385954373557129	IV_4750189	4750189	IV_5208413	5208413
II_5762423	II	5762423	A_12_P108313	4.66503288620102	2.86007525520508	2	0.0797156151539921	0.281450278173324	II_4740943	4740943	II_5911690	5911690
II_14189728	II	14189728	A_12_P108313	3.18523803281824	2.93140930325939	3	0.0714067484467033	0.266378770550261	II_14182281	14182281	II_14229519	14229519
X_5638607	X	5638607	A_12_P108320	5.02675941084818	2.94399411092178	1	0.132139815836554	0.362365489267983	X_4674201	4674201	X_5810100	5810100
III_148752	III	148752	A_12_P108322	13.8488649698926	3.03326841118462	1	0.328214300381224	0.571095490700393	III_145403	145403	III_149656	149656
V_3174175	V	3174175	A_12_P108322	9.83692713538276	2.9863739501697	2	0.159439736683113	-0.398041418753874	V_3130581	3130581	V_3491728	3491728
V_17733401	V	17733401	A_12_P108325	3.58074561184904	3.07417221412469	1	0.0941662942672703	-0.305886431463486	V_17347455	17347455	V_17814400	17814400
X_14831851	X	14831851	A_12_P108326	14.606714795556	3.13067800492453	1	0.343854876708648	0.584544495672632	X_14630642	14630642	X_15106792	15106792
I_2260201	I	2260201	A_12_P108328	8.05830900789821	2.67344477935728	1	0.00626669844254682	0.0788871326856444	I_2250505	2250505	I_2284272	2284272
I_2260201	I	2260201	A_12_P108328	7.66939650047976	2.78470112551783	2	0.00626669844254682	0.0788871326856444	I_2250505	2250505	I_2284272	2284272
I_2260201	I	2260201	A_12_P108328	7.29714072461462	2.67380220858655	3	0.00626669844254682	0.0788871326856444	I_2250505	2250505	I_2284272	2284272
I_2260201	I	2260201	A_12_P108328	6.9410150573468	2.74967030925916	4	0.00626669844254682	0.0788871326856444	I_2250505	2250505	I_2284272	2284272
I_2260201	I	2260201	A_12_P108328	6.60049341853966	2.81690617921659	5	0.00626669844254682	0.0788871326856444	I_2250505	2250505	I_2284272	2284272
I_2260201	I	2260201	A_12_P108328	6.27505182747131	2.66229891036261	6	0.00626669844254682	0.0788871326856444	I_2250505	2250505	I_2284272	2284272
I_2260201	I	2260201	A_12_P108328	5.96416984781835	2.76459023397563	7	0.00626669844254682	0.0788871326856444	I_2250505	2250505	I_2284272	2284272
I_2260201	I	2260201	A_12_P108328	5.66733191872886	2.8925801945609	8	0.00626669844254682	0.0788871326856444	I_2250505	2250505	I_2284272	2284272
I_2260201	I	2260201	A_12_P108328	5.38402857108464	2.73668038101237	9	0.00626669844254682	0.0788871326856444	I_2250505	2250505	I_2284272	2284272
I_2260201	I	2260201	A_12_P108328	5.11375752931987	2.75856589291333	10	0.00626669844254682	0.0788871326856444	I_2250505	2250505	I_2284272	2284272
I_2260201	I	2260201	A_12_P108328	4.85602470029012	2.9370480450106	11	0.00626669844254682	0.0788871326856444	I_2250505	2250505	I_2284272	2284272
I_2260201	I	2260201	A_12_P108328	4.61034505167194	2.74612895567974	12	0.00626669844254682	0.0788871326856444	I_2250505	2250505	I_2284272	2284272
I_2260201	I	2260201	A_12_P108328	4.3762433832173	2.87939681972723	13	0.00626669844254682	0.0788871326856444	I_2250505	2250505	I_2284272	2284272
I_2260201	I	2260201	A_12_P108328	4.15325499489424	2.88119767922653	14	0.00626669844254682	0.0788871326856444	I_2250505	2250505	I_2284272	2284272
I_2260201	I	2260201	A_12_P108328	3.94092625651955	2.78620106813387	15	0.00626669844254682	0.0788871326856444	I_2250505	2250505	I_2284272	2284272
I_2260201	I	2260201	A_12_P108328	3.73881508394048	2.84468094421624	16	0.00626669844254682	0.0788871326856444	I_2250505	2250505	I_2284272	2284272
I_2260201	I	2260201	A_12_P108328	3.54649132715734	2.92749032513244	17	0.00626669844254682	0.0788871326856444	I_2250505	2250505	I_2284272	2284272
I_2260201	I	2260201	A_12_P108328	3.36353707600957	2.76336063157586	18	0.00626669844254682	0.0788871326856444	I_2250505	2250505	I_2284272	2284272
I_2260201	I	2260201	A_12_P108328	3.189546889183	2.81248754804417	19	0.00626669844254682	0.0788871326856444	I_2250505	2250505	I_2284272	2284272
I_2260201	I	2260201	A_12_P108328	3.02412795234774	2.73934773670253	20	0.00626669844254682	0.0788871326856444	I_2250505	2250505	I_2284272	2284272
X_3843271	X	3843271	A_12_P108331	3.21300465607606	2.93785233080749	1	0.0866637362744826	-0.293459846195966	X_3716925	3716925	X_4566632	4566632
II_3373587	II	3373587	A_12_P108332	14.1839639908474	3.0150471606686	1	0.33644070328334	0.578031506555691	II_3373318	3373318	II_3376857	3376857
II_4905764	II	4905764	A_12_P108338	3.75629659600659	3.04407895538795	1	0.104488289480537	0.322188391292939	II_4364919	4364919	II_5465868	5465868
III_13775016	III	13775016	A_12_P108353	12.9045197055285	3.18364164684041	1	0.31107518579001	0.557736571106694	III_13105354	13105354	III_13780165	13780165
X_5526747	X	5526747	A_12_P108355	2.62950073643382	2.27401773296974	1	0.0712166755083364	0.266024006226482	X_3907685	3907685	X_10575718	10575718
IV_4761504	IV	4761504	A_12_P108357	4.16629190451504	2.93824701986172	1	0.110395469097608	0.331211651321641	IV_4368392	4368392	IV_5163110	5163110
IV_15683717	IV	15683717	A_12_P108364	5.92344876299021	2.99033760332003	1	0.154353805459367	-0.391641451851919	IV_15619530	15619530	IV_16053550	16053550
II_2284267	II	2284267	A_12_P108366	17.6464618955937	3.10402576717485	1	0.357632674707866	-0.596000199426642	II_2196572	2196572	II_2334376	2334376
X_3843271	X	3843271	A_12_P108370	3.06302701094422	3.00369323149903	1	0.0827953315305427	-0.286835503686355	X_2574020	2574020	X_4322768	4322768
II_1732850	II	1732850	A_12_P108371	52.2597463125652	3.03358554546085	1	0.641407419135401	-0.798356693596303	II_1727040	1727040	II_1856961	1856961
II_1857611	II	1857611	A_12_P108371	4.78197145961177	2.77001557330048	2	0.61673732821619	-0.782852781240083	II_1718365	1718365	II_1903099	1903099
V_19900018	V	19900018	A_12_P108373	3.00477042650215	2.99886920821037	1	0.0788352824800938	0.279891877505273	V_19685583	19685583	V_20921615	20921615
V_527643	V	527643	A_12_P108375	9.13848041331463	3.03876033448575	1	0.236116307441183	0.484295569590419	V_8249	8249	V_684064	684064
IV_4761504	IV	4761504	A_12_P108375	4.03424032406818	3.02250737068097	2	0.0905452844455235	-0.299902732925005	IV_4656772	4656772	IV_6763856	6763856
V_20445160	V	20445160	A_12_P108380	25.6593939707334	3.019672468119	1	0.498991590685973	0.704168501705995	V_20379656	20379656	V_20921615	20921615
IV_15619530	IV	15619530	A_12_P108380	5.41962884691011	3.00959484519826	2	0.0561231536615534	-0.236157104175084	IV_15467845	15467845	IV_16375110	16375110
I_11545278	I	11545278	A_12_P108385	5.97687600076225	3.03264958477066	1	0.117265237710895	-0.341326493446315	I_11373077	11373077	I_11604995	11604995
IV_7016150	IV	7016150	A_12_P108390	3.9725341433304	3.02263971844812	1	0.104849450073258	0.322778323248123	IV_6578183	6578183	IV_8696159	8696159
IV_13713927	IV	13713927	A_12_P108400	12.4658282789115	3.11741731937088	1	0.296715798533355	-0.543000609056437	IV_13630403	13630403	IV_14547789	14547789
III_4911067	III	4911067	A_12_P108408	3.19438685021178	3.09441417530688	1	0.0861844363333306	-0.292647220819277	III_3672463	3672463	III_7946405	7946405
II_5911690	II	5911690	A_12_P108419	49.6870619738087	3.1086075514529	1	0.756070197455752	-0.866784309376438	II_5839860	5839860	II_6331341	6331341
V_15066983	V	15066983	A_12_P108423	12.5965249442611	2.90638565212078	1	0.289136893030334	0.536020915641345	V_14190003	14190003	V_15269015	15269015
III_5369519	III	5369519	A_12_P108433	5.04223695414303	3.06986667321647	1	0.134667559379668	0.365814971805975	III_3627021	3627021	III_5748303	5748303
X_4758185	X	4758185	A_12_P108433	3.11188235378694	3.03468370000073	2	0.0799682518949853	-0.28189591503694	X_4175841	4175841	X_5676445	5676445
X_4958735	X	4958735	A_12_P108436	5.52132400858618	2.96247614938833	1	0.141418645396959	-0.374872271519529	X_4483054	4483054	X_5569019	5569019
X_4893004	X	4893004	A_12_P108444	14.9660031347465	2.9974480932224	1	0.338370601300018	0.579864194713477	X_4536045	4536045	X_4958735	4958735
III_3630998	III	3630998	A_12_P108450	18.0987111314222	3.11173766650957	1	0.411459580113707	-0.639391913229063	III_3481204	3481204	III_4200443	4200443
IV_3170152	IV	3170152	A_12_P108465	7.69935078624799	3.03520912772082	1	0.225818887977233	0.473479164508613	IV_2877153	2877153	IV_3375408	3375408
IV_12887087	IV	12887087	A_12_P108466	9.52219333322085	2.94114673223445	1	0.236826565328179	0.485115543014798	IV_12697226	12697226	IV_13011435	13011435
III_12643539	III	12643539	A_12_P108468	38.1720370696352	3.00379552815278	1	0.668962596300099	-0.815188555139584	III_12640270	12640270	III_12731659	12731659
V_20203538	V	20203538	A_12_P108470	12.4538206179362	3.14085474516158	1	0.291303966658703	-0.538025897368766	V_20128871	20128871	V_20921615	20921615
X_13262770	X	13262770	A_12_P108471	3.96571790529888	3.01850889776375	1	0.124022456880212	0.350861471259573	X_12958923	12958923	X_13669225	13669225
III_4911067	III	4911067	A_12_P108471	3.15293507064834	2.98692150173569	2	0.0861259169460731	0.292383219749214	III_4128469	4128469	III_6224347	6224347
V_5045041	V	5045041	A_12_P108475	3.23654184609561	3.08244042654049	1	0.08409794168438	0.289083074240176	V_4884376	4884376	V_5261629	5261629
X_12840430	X	12840430	A_12_P108481	6.65572974831134	3.01518629906895	1	0.174179728488892	-0.416017191311453	X_11570896	11570896	X_13018666	13018666
V_11513193	V	11513193	A_12_P108481	4.70137413256551	3.12002291636593	2	0.117707637236544	-0.34199109208145	V_9889822	9889822	V_12132514	12132514
V_12609412	V	12609412	A_12_P108501	3.10392575059094	3.06145764141997	1	0.0838519081996643	0.288659899722567	V_11050301	11050301	V_14111468	14111468
II_14204646	II	14204646	A_12_P108509	3.62322864225041	2.94635287980991	1	0.0929980226342806	0.303995278598477	II_13909294	13909294	II_14281777	14281777
V_2621596	V	2621596	A_12_P108514	13.7782839951944	3.16324398553493	1	0.328727548486644	-0.571541844162121	V_2283377	2283377	V_2671879	2671879
X_5291269	X	5291269	A_12_P108515	7.37424393225932	3.10224423208044	1	0.188884028460592	0.433203672451379	X_4630882	4630882	X_5638607	5638607
II_13459444	II	13459444	A_12_P108518	3.25256463622184	3.02298899493933	1	0.0864864390148915	0.293159511438523	II_13374406	13374406	II_13744022	13744022
III_5370	III	5370	A_12_P108525	27.3642638179341	3.03268229881492	1	0.538325860030565	-0.730901157695354	III_4664	4664	III_119077	119077
V_3491728	V	3491728	A_12_P108526	4.06064339955245	3.02528928731126	1	0.112284194723171	-0.334005659478498	V_2887755	2887755	V_3897200	3897200
X_5576572	X	5576572	A_12_P108532	4.50302621210216	3.07730972045732	1	0.118749695887154	0.343515418073048	X_4639456	4639456	X_5949176	5949176
X_5526747	X	5526747	A_12_P108539	3.05640434014364	2.95287260365905	1	0.0822756120232078	0.285933830359082	X_3713398	3713398	X_5676445	5676445
V_5175241	V	5175241	A_12_P108542	3.55799287765278	2.96833698944001	1	0.0926168753165572	0.30337168497634	V_4959381	4959381	V_5614890	5614890
X_3088382	X	3088382	A_12_P108549	3.78056426677005	3.04221729894639	1	0.102530188353641	-0.319194837680266	X_2611205	2611205	X_3907685	3907685
IV_15961314	IV	15961314	A_12_P108551	2.15863615308673	2.06006511280008	1	0.0585907912697111	-0.241292966592759	IV_15402798	15402798	IV_17490756	17490756
X_4758185	X	4758185	A_12_P108554	3.44161476745896	3.10884168231028	1	0.0920034677763276	0.302359334811022	X_3716925	3716925	X_5676445	5676445
V_5237566	V	5237566	A_12_P108555	3.35429254750263	3.01225949489099	1	0.0890622002668019	-0.297492958979675	V_4261110	4261110	V_5602686	5602686
X_5526747	X	5526747	A_12_P108556	3.15710059734604	3.01434609233654	1	0.0848642780361915	0.290397211485372	X_4165450	4165450	X_5810100	5810100
II_13056136	II	13056136	A_12_P108559	5.81122994898645	2.98155268890218	1	0.152698336479123	0.389535581921636	II_12919260	12919260	II_13226999	13226999
IV_15091125	IV	15091125	A_12_P108568	4.14587962983569	3.07639796685526	1	0.107022002765926	0.326111803541221	IV_14850801	14850801	IV_15525171	15525171
II_4996280	II	4996280	A_12_P108572	3.58221640622482	3.06274888444029	1	0.0971447378809908	0.310698832773428	II_4532532	4532532	II_6575108	6575108
X_5291269	X	5291269	A_12_P108578	3.36486772552134	3.05730600835822	1	0.0888593742335878	0.297154017715893	X_4504557	4504557	X_6695080	6695080
X_5569019	X	5569019	A_12_P108592	4.20496963426563	2.89369745120987	1	0.111830900481522	0.333358007980584	X_4350782	4350782	X_5810100	5810100
X_3843271	X	3843271	A_12_P108605	3.18580906513505	3.01752539047578	1	0.0859635213990582	-0.292271911618405	X_2932540	2932540	X_3940409	3940409
III_1806339	III	1806339	A_12_P108607	3.29078814298343	2.97489324439745	1	0.0898716762785002	0.29884184046094	III_1441659	1441659	III_1955084	1955084
IV_3117738	IV	3117738	A_12_P108623	11.5246505133352	2.99087383759579	1	0.288190523927553	-0.535110408022654	IV_3095902	3095902	IV_3407296	3407296
IV_15525171	IV	15525171	A_12_P108624	5.18417366269781	3.0375561646355	1	0.135975136264989	-0.36758665200022	IV_15393010	15393010	IV_15621314	15621314
II_13106619	II	13106619	A_12_P108638	3.58586013528368	2.99731472283695	1	0.0927121572585875	0.303527695490736	II_12843112	12843112	II_13163102	13163102
IV_8127338	IV	8127338	A_12_P108647	3.33844525818638	2.87182816444941	1	0.0886614441295752	0.296822884872623	IV_6763856	6763856	IV_8986377	8986377
V_5045041	V	5045041	A_12_P108657	3.52777467832688	3.05229202525604	1	0.0912857998322307	0.301183789910719	V_4445869	4445869	V_5261629	5261629
II_12691188	II	12691188	A_12_P108659	16.9655985197634	3.0163412007828	1	0.423216306643176	0.648189418158326	II_12610950	12610950	II_12729664	12729664
III_1464277	III	1464277	A_12_P108679	5.95760325598142	3.07465973613354	1	0.158429097536654	-0.396777882597033	III_1249933	1249933	III_1633618	1633618
X_5526747	X	5526747	A_12_P108681	3.49344842380194	2.91922789891041	1	0.093456474075688	0.304743658685746	X_4171941	4171941	X_7628078	7628078
X_3843271	X	3843271	A_12_P108683	6.04256607759788	3.02871161967823	1	0.156584546459631	-0.39446132635701	X_3789476	3789476	X_3863779	3863779
III_4161821	III	4161821	A_12_P108688	3.79115635509241	3.06085718254245	1	0.102505803001174	0.319156877438449	III_3623259	3623259	III_5224162	5224162
IV_16450691	IV	16450691	A_12_P108693	42.0609104672743	3.11633275503164	1	0.744040146722559	0.859304066640184	IV_16445097	16445097	IV_16488050	16488050
III_1076199	III	1076199	A_12_P108704	4.2766479560249	3.04660742482565	1	0.11572296706056	-0.339109347641234	III_941866	941866	III_1452343	1452343
II_1732850	II	1732850	A_12_P108718	52.4482304113214	2.9871549312786	1	0.64239298374563	-0.798969821896102	II_1727040	1727040	II_1856961	1856961
II_1857551	II	1857551	A_12_P108718	4.53682859633856	2.56561421947785	2	0.618325356413969	-0.786312190102217	II_1709378	1709378	II_2203785	2203785
V_5045041	V	5045041	A_12_P108735	3.27535777721392	3.12400182911733	1	0.0850594552934614	0.290730958389074	V_4520286	4520286	V_5261629	5261629
II_4858788	II	4858788	A_12_P108736	3.80584058114593	3.03037664063199	1	0.103442829306302	-0.320612297758814	II_4739944	4739944	II_5249075	5249075
V_13010814	V	13010814	A_12_P108736	3.24282231703553	3.1180763010766	2	0.0753443662639418	0.273624747282067	V_12112105	12112105	V_14190544	14190544
X_4179483	X	4179483	A_12_P108736	3.18153378529452	3.03681389112612	3	0.0740964830120332	-0.271349345670126	X_3594656	3594656	X_4862702	4862702
II_1296443	II	1296443	A_12_P108745	3.31651434914292	3.12495633019459	1	0.0836224350025206	0.288125797749159	II_733570	733570	II_2126849	2126849
X_2954080	X	2954080	A_12_P108752	4.09769087500949	3.06336262008354	1	0.11169349900938	0.33314648149061	X_2518073	2518073	X_3303492	3303492
X_6953360	X	6953360	A_12_P108755	3.61179628409127	2.91655529263708	1	0.0991314685094001	0.313859841575814	X_6366333	6366333	X_7802067	7802067
X_5576572	X	5576572	A_12_P108761	4.37427983039559	3.12295244059527	1	0.115565173125257	0.338878072670759	X_4674201	4674201	X_5922452	5922452
X_4758185	X	4758185	A_12_P108767	20.0184953070426	3.06578591425908	1	0.425354194110086	0.6501376858015	X_4753798	4753798	X_4958735	4958735
V_5281983	V	5281983	A_12_P108767	4.41612809994161	3.01399639528093	2	0.100730941576885	0.316381753017521	V_5149493	5149493	V_7541012	7541012
X_4175841	X	4175841	A_12_P108780	5.09909477715225	3.18952719615849	1	0.134918210095603	0.366147917341446	X_3907685	3907685	X_4402562	4402562
X_4758185	X	4758185	A_12_P108799	3.01793128930335	2.93294160590908	1	0.0809137649533486	-0.28355753093485	X_4284268	4284268	X_5569019	5569019
X_4862702	X	4862702	A_12_P108801	4.02645159807634	3.01615229245739	1	0.105334599224679	-0.323530705603886	X_4284268	4284268	X_5576572	5576572
V_2271007	V	2271007	A_12_P108810	4.25978561832275	2.94100786809866	1	0.11659175720006	0.340373081612127	V_1792116	1792116	V_3219198	3219198
X_5576572	X	5576572	A_12_P108816	4.78528857302027	2.8422067216233	1	0.125689996659085	0.353411224405003	X_4753798	4753798	X_5810100	5810100
V_18938530	V	18938530	A_12_P108827	16.9028517564447	3.05373160380422	1	0.369204802029067	0.605684058801457	V_18916789	18916789	V_19098196	19098196
III_1275807	III	1275807	A_12_P108835	48.4793973344602	3.17157254973993	1	0.76046042098538	0.869244312432939	III_1249933	1249933	III_1361852	1361852
IV_15573322	IV	15573322	A_12_P108853	3.54156197063916	3.05362792179929	1	0.095449983761397	0.307976735157248	IV_15391532	15391532	IV_15983752	15983752
V_20234254	V	20234254	A_12_P108855	21.2469160489934	3.11721463809946	1	0.477917169181979	-0.690706757631228	V_20197909	20197909	V_20251656	20251656
X_3136351	X	3136351	A_12_P108855	4.31393181684614	2.92286819578141	2	0.0913408495936609	-0.301070741188539	X_2636716	2636716	X_3572913	3572913
V_684064	V	684064	A_12_P108861	5.39205704723856	3.2038335380117	1	0.141562438133864	-0.37506280585294	V_8249	8249	V_1062760	1062760
I_11858299	I	11858299	A_12_P108874	8.58748131679478	3.09090912414553	1	0.171208297877484	-0.412470018461739	I_11833643	11833643	I_11959318	11959318
I_1451409	I	1451409	A_12_P108875	3.12356134676803	3.0645025930332	1	0.0295611380072756	0.171392003606678	I_865340	865340	I_1683933	1683933
X_4758185	X	4758185	A_12_P108884	8.44949925133452	2.96634956275685	1	0.209859289037332	0.456661164645034	X_4175841	4175841	X_5526747	5526747
II_13377881	II	13377881	A_12_P108896	7.99418322439929	2.96239110801993	1	0.20236271382314	0.44843058810986	II_13372003	13372003	II_13459444	13459444
IV_15961314	IV	15961314	A_12_P108902	8.65497043605969	3.07933918939964	1	0.219380983943615	-0.466858042770847	IV_15573322	15573322	IV_16014568	16014568
V_533022	V	533022	A_12_P108902	9.2123587813805	3.01856208979969	2	0.176084656590233	-0.418259787368159	V_8249	8249	V_690960	690960
X_5949176	X	5949176	A_12_P108902	4.46520111306218	3.00251267973425	3	0.0524641571036572	0.228305673952331	X_5779735	5779735	X_7044171	7044171
V_13010814	V	13010814	A_12_P108903	3.33197116426784	3.13360091708096	1	0.0897203354553768	-0.298590114732613	V_11591667	11591667	V_13622608	13622608
X_3843271	X	3843271	A_12_P108904	3.73988051545201	3.16433289328924	1	0.100121119174553	-0.315422615868185	X_3713398	3713398	X_3940409	3940409
X_3843271	X	3843271	A_12_P108909	3.10937798465981	2.98213476436391	1	0.0839926665095157	-0.288902078125625	X_3716925	3716925	X_4505845	4505845
V_575333	V	575333	A_12_P108911	20.3721439293217	2.94952398721382	1	0.431509187902069	-0.656858651583993	V_544989	544989	V_690960	690960
X_6597806	X	6597806	A_12_P108912	3.27169610469486	3.11066464214912	1	0.0902328579778486	0.299441740120538	X_5569019	5569019	X_7453747	7453747
V_15723870	V	15723870	A_12_P108921	7.417367167208	3.02825413638884	1	0.187307478369239	-0.431400961293938	V_15581687	15581687	V_15834708	15834708
X_2241158	X	2241158	A_12_P108924	6.34954003981639	3.17049023864006	1	0.160748144854904	0.399671302739107	X_1461018	1461018	X_2636716	2636716
IV_16527967	IV	16527967	A_12_P108933	3.68654098973354	3.03439814519052	1	0.0952726071299848	-0.307440390539702	IV_16377655	16377655	IV_17490756	17490756
IV_8736539	IV	8736539	A_12_P108934	4.83081002287095	3.01507639541337	1	0.140868851397033	0.374001092554908	IV_7630216	7630216	IV_8986377	8986377
V_19932372	V	19932372	A_12_P108942	16.5554935772061	3.04881011119099	1	0.366429185093977	-0.603427376760621	V_19900018	19900018	V_20135102	20135102
IV_4550944	IV	4550944	A_12_P108944	3.49792477255856	2.95244577777677	1	0.0918958207600009	0.302182397967298	IV_3920365	3920365	IV_4844241	4844241
I_12804294	I	12804294	A_12_P108950	11.6471173463979	2.93723432784628	1	0.263494048660456	0.51240820938204	I_12804007	12804007	I_12805399	12805399
X_6695080	X	6695080	A_12_P108952	4.39482957210929	3.02551231619095	1	0.119402559052124	-0.34445841485037	X_5615449	5615449	X_9086971	9086971
IV_4761504	IV	4761504	A_12_P108952	5.1168672438136	3.05585812372686	2	0.111671823289533	0.333120826095094	IV_4566633	4566633	IV_6109938	6109938
IV_1586020	IV	1586020	A_12_P108963	3.67010841905087	3.06629842546215	1	0.100520757637371	-0.31605150152229	IV_1500428	1500428	IV_1713430	1713430
I_2260201	I	2260201	A_12_P108969	5.10835489218925	3.01684818683639	1	0.00343811568498937	-0.0584507683089058	I_2250505	2250505	I_2382076	2382076
I_2260201	I	2260201	A_12_P108969	4.87311123482121	2.98617922115331	2	0.00343811568498937	-0.0584507683089058	I_2250505	2250505	I_2382076	2382076
I_2260201	I	2260201	A_12_P108969	4.64798634901434	3.00812048973662	3	0.00343811568498937	-0.0584507683089058	I_2250505	2250505	I_2382076	2382076
I_2260201	I	2260201	A_12_P108969	4.43260695524027	3.01406559084915	4	0.00343811568498937	-0.0584507683089058	I_2250505	2250505	I_2382076	2382076
I_2260201	I	2260201	A_12_P108969	4.22660824591313	3.04055781283113	5	0.00343811568498937	-0.0584507683089058	I_2250505	2250505	I_2382076	2382076
I_2260201	I	2260201	A_12_P108969	4.02963416307604	3.07237440267266	6	0.00343811568498937	-0.0584507683089058	I_2250505	2250505	I_2382076	2382076
I_2260201	I	2260201	A_12_P108969	3.84133762484154	3.02162160724254	7	0.00343811568498937	-0.0584507683089058	I_2250505	2250505	I_2382076	2382076
I_2260201	I	2260201	A_12_P108969	3.66138070372735	3.04145378568027	8	0.00343811568498937	-0.0584507683089058	I_2250505	2250505	I_2382076	2382076
I_2260201	I	2260201	A_12_P108969	3.48943476007187	3.0462983211874	9	0.00343811568498937	-0.0584507683089058	I_2250505	2250505	I_2382076	2382076
I_2260201	I	2260201	A_12_P108969	3.32518053372197	2.94810886398031	10	0.00343811568498937	-0.0584507683089058	I_2250505	2250505	I_2394565	2394565
I_2260201	I	2260201	A_12_P108969	3.16830819716257	3.03351759043941	11	0.00343811568498937	-0.0584507683089058	I_2250505	2250505	I_2394565	2394565
I_2260201	I	2260201	A_12_P108969	3.01851737320736	3.00650276506842	12	0.00343811568498937	-0.0584507683089058	I_2250505	2250505	I_2394565	2394565
X_3088382	X	3088382	A_12_P108970	4.61710684086095	3.02090907408603	1	0.123740080169571	-0.350659151700978	X_2636716	2636716	X_3940409	3940409
II_3288020	II	3288020	A_12_P108975	28.322959776286	3.05935508065481	1	0.52603809257586	0.723000468118301	II_3287146	3287146	II_3331906	3331906
II_6854401	II	6854401	A_12_P108983	3.4396199783147	3.08772113992152	1	0.0945174647025073	0.306468620316941	II_6299394	6299394	II_7946758	7946758
X_12206293	X	12206293	A_12_P108984	11.0024174682245	2.93540017877993	1	0.295277318211985	0.541477516133494	X_11570896	11570896	X_12932361	12932361
X_5291269	X	5291269	A_12_P108996	5.11464339384171	2.95490459125234	1	0.131756152438272	0.361839049014186	X_4630882	4630882	X_5676445	5676445
II_14189728	II	14189728	A_12_P109012	3.12388055686045	3.06716775258653	1	0.0813010670480788	-0.284235359486408	II_13882420	13882420	II_14465917	14465917
V_6526389	V	6526389	A_12_P109018	3.5609081496574	2.98494955663268	1	0.0922656209128977	0.30278979719744	V_5167653	5167653	V_7343918	7343918
IV_872114	IV	872114	A_12_P109022	3.02537858460436	2.97684632206009	1	0.0798304998325881	0.281653015636774	IV_122764	122764	IV_1250791	1250791
III_3016891	III	3016891	A_12_P109023	4.46725042234806	3.00024649845428	1	0.11882611150473	-0.343625926655875	III_2859982	2859982	III_3329353	3329353
II_10732488	II	10732488	A_12_P109033	4.00985411943361	3.094083568591	1	0.109123519040492	-0.329298052833578	II_9845678	9845678	II_12273112	12273112
IV_12079110	IV	12079110	A_12_P109036	5.27575805842786	3.06723654418182	1	0.138736598090497	0.371300472487987	IV_9987122	9987122	IV_12621984	12621984
X_4721441	X	4721441	A_12_P109044	3.77168893445368	3.13170656612359	1	0.0995516261458779	-0.314524268204561	X_3946591	3946591	X_5390152	5390152
IV_3857221	IV	3857221	A_12_P109044	4.26416953981462	3.09821551507517	2	0.0932078418975753	0.304338017762244	IV_3792388	3792388	IV_5163110	5163110
II_1501777	II	1501777	A_12_P109048	44.1476222407152	3.012836195746	1	0.600997202984519	-0.772798386619676	II_1417887	1417887	II_1619961	1619961
II_1860263	II	1860263	A_12_P109048	2.75892837020558	2.49542887513247	2	0.511358675198329	-0.71433757507712	II_6368	6368	II_2344110	2344110
IV_1575852	IV	1575852	A_12_P109060	3.6765255331468	2.91524908415224	1	0.100911074403385	-0.31666451262824	IV_1438098	1438098	IV_1847114	1847114
II_13446733	II	13446733	A_12_P109066	3.0455241822687	3.01816975874521	1	0.081621413828626	0.284794788581689	II_13163270	13163270	II_13655631	13655631
IV_4755912	IV	4755912	A_12_P109066	3.4164461836839	2.99399715594831	2	0.0659494458065798	-0.255997401193565	IV_4281922	4281922	IV_6109938	6109938
V_529501	V	529501	A_12_P109067	17.1307110252491	3.1414152705491	1	0.378876237172814	-0.613578264204846	V_527699	527699	V_537511	537511
I_2260201	I	2260201	A_12_P109070	16.5039402310119	2.63859100566143	1	0.00971473140010512	-0.0982489395873602	I_2250505	2250505	I_2284272	2284272
I_2260201	I	2260201	A_12_P109070	15.843578596012	2.5624429037821	2	0.00971473140010512	-0.0982489395873602	I_2250505	2250505	I_2284272	2284272
I_2260201	I	2260201	A_12_P109070	15.2041540055001	2.63812564970201	3	0.00971473140010512	-0.0982489395873602	I_2250505	2250505	I_2284272	2284272
I_2260201	I	2260201	A_12_P109070	14.5853801947395	2.58847332017956	4	0.00971473140010512	-0.0982489395873602	I_2250505	2250505	I_2284272	2284272
I_2260201	I	2260201	A_12_P109070	13.9869501583886	2.724808575074	5	0.00971473140010512	-0.0982489395873602	I_2250505	2250505	I_2284272	2284272
I_2260201	I	2260201	A_12_P109070	13.4085375566396	2.66340819859431	6	0.00971473140010512	-0.0982489395873602	I_2250505	2250505	I_2284272	2284272
I_2260201	I	2260201	A_12_P109070	12.8497981736338	2.69472079068281	7	0.00971473140010512	-0.0982489395873602	I_2250505	2250505	I_2284272	2284272
I_2260201	I	2260201	A_12_P109070	12.3103714152471	2.73167494046198	8	0.00971473140010512	-0.0982489395873602	I_2250505	2250505	I_2284272	2284272
I_2260201	I	2260201	A_12_P109070	11.789881833525	2.71237889786961	9	0.00971473140010512	-0.0982489395873602	I_2250505	2250505	I_2284272	2284272
I_2260201	I	2260201	A_12_P109070	11.2879406653964	2.70057571659598	10	0.00971473140010512	-0.0982489395873602	I_2250505	2250505	I_2284272	2284272
I_2260201	I	2260201	A_12_P109070	10.8041473737923	2.79488452277753	11	0.00971473140010512	-0.0982489395873602	I_2250505	2250505	I_2284272	2284272
I_2260201	I	2260201	A_12_P109070	10.3380911799268	2.84270991056098	12	0.00971473140010512	-0.0982489395873602	I_2250505	2250505	I_2284272	2284272
I_2260201	I	2260201	A_12_P109070	9.8893525762312	2.78898512519115	13	0.00971473140010512	-0.0982489395873602	I_2250505	2250505	I_2284272	2284272
I_2260201	I	2260201	A_12_P109070	9.45750481026723	2.95297074516503	14	0.00971473140010512	-0.0982489395873602	I_2250505	2250505	I_2284272	2284272
I_2260201	I	2260201	A_12_P109070	9.04211533083554	2.8219260757914	15	0.00971473140010512	-0.0982489395873602	I_2250505	2250505	I_2284272	2284272
I_2260201	I	2260201	A_12_P109070	8.64274718844522	2.87047182596221	16	0.00971473140010512	-0.0982489395873602	I_2250505	2250505	I_2284272	2284272
I_2260201	I	2260201	A_12_P109070	8.2589603832819	2.87762024049622	17	0.00971473140010512	-0.0982489395873602	I_2250505	2250505	I_2284272	2284272
I_2260201	I	2260201	A_12_P109070	7.89031315479656	2.91153321470043	18	0.00971473140010512	-0.0982489395873602	I_2250505	2250505	I_2284272	2284272
I_2260201	I	2260201	A_12_P109070	7.53636320801451	2.84330679539763	19	0.00971473140010512	-0.0982489395873602	I_2250505	2250505	I_2284272	2284272
I_2260201	I	2260201	A_12_P109070	7.1966688726204	2.81749017195097	20	0.00971473140010512	-0.0982489395873602	I_2250505	2250505	I_2284272	2284272
I_2260201	I	2260201	A_12_P109070	6.87079019179635	2.88874586057095	21	0.00971473140010512	-0.0982489395873602	I_2250505	2250505	I_2284272	2284272
I_2260201	I	2260201	A_12_P109070	6.55828993866678	2.93465519612183	22	0.00971473140010512	-0.0982489395873602	I_2250505	2250505	I_2284272	2284272
I_2260201	I	2260201	A_12_P109070	6.25873455902561	2.96364411382546	23	0.00971473140010512	-0.0982489395873602	I_2250505	2250505	I_2284272	2284272
I_2260201	I	2260201	A_12_P109070	5.971695039782	2.91526257832624	24	0.00971473140010512	-0.0982489395873602	I_2250505	2250505	I_2284272	2284272
I_2260201	I	2260201	A_12_P109070	5.69674770325624	2.94495206259554	25	0.00971473140010512	-0.0982489395873602	I_2250505	2250505	I_2284272	2284272
I_2260201	I	2260201	A_12_P109070	5.4334749280826	3.04953574988817	26	0.00971473140010512	-0.0982489395873602	I_2250505	2250505	I_2284272	2284272
I_2260201	I	2260201	A_12_P109070	5.18146579803141	2.91823829386094	27	0.00971473140010512	-0.0982489395873602	I_2250505	2250505	I_2284272	2284272
I_2260201	I	2260201	A_12_P109070	4.94031668054704	2.98626600517789	28	0.00971473140010512	-0.0982489395873602	I_2250505	2250505	I_2284272	2284272
I_2260201	I	2260201	A_12_P109070	4.70963173721308	2.8726362265001	29	0.00971473140010512	-0.0982489395873602	I_2250505	2250505	I_2284272	2284272
I_2260201	I	2260201	A_12_P109070	4.48902336870411	3.04850608921109	30	0.00971473140010512	-0.0982489395873602	I_2250505	2250505	I_2284272	2284272
I_2260201	I	2260201	A_12_P109070	4.2781125970667	2.95471740179116	31	0.00971473140010512	-0.0982489395873602	I_2250505	2250505	I_2284272	2284272
I_2260201	I	2260201	A_12_P109070	4.0765293883958	2.90058111753323	32	0.00971473140010512	-0.0982489395873602	I_2250505	2250505	I_2284272	2284272
I_2260201	I	2260201	A_12_P109070	3.88391291913977	3.05096402372315	33	0.00971473140010512	-0.0982489395873602	I_2250505	2250505	I_2284272	2284272
I_2260201	I	2260201	A_12_P109070	3.69991178938325	3.09914660661562	34	0.00971473140010512	-0.0982489395873602	I_2250505	2250505	I_2284272	2284272
I_2260201	I	2260201	A_12_P109070	3.52418418652646	2.99430558358502	35	0.00971473140010512	-0.0982489395873602	I_2250505	2250505	I_2284272	2284272
I_2260201	I	2260201	A_12_P109070	3.35639800280707	3.06663923956622	36	0.00971473140010512	-0.0982489395873602	I_2250505	2250505	I_2284272	2284272
I_2260201	I	2260201	A_12_P109070	3.19623091010207	3.15192753606054	37	0.00971473140010512	-0.0982489395873602	I_2250505	2250505	I_2284272	2284272
III_2813359	III	2813359	A_12_P109080	10.4987496561154	3.06564114409482	1	0.255715200003848	-0.504090198581277	III_2757945	2757945	III_2822641	2822641
X_4322768	X	4322768	A_12_P109088	3.29785733946399	3.05873386223012	1	0.0888449278193341	-0.297129861657146	X_3713398	3713398	X_5361887	5361887
V_14290503	V	14290503	A_12_P109090	3.17417940029832	2.92630735102178	1	0.0828143231801233	0.287030596439577	V_13796956	13796956	V_15831985	15831985
V_9905233	V	9905233	A_12_P109101	7.80369452570406	2.95577566746971	1	0.194608736324256	-0.439755366093186	V_7626098	7626098	V_10838024	10838024
X_4958735	X	4958735	A_12_P109109	4.13019913226912	2.81106618890566	1	0.113258364854278	0.335437198449422	X_4639456	4639456	X_5922452	5922452
X_5361887	X	5361887	A_12_P109110	9.69015281883176	3.0609099477184	1	0.235412001031748	-0.483664576342848	X_5242819	5242819	X_5526747	5526747
X_7801408	X	7801408	A_12_P109114	3.47321478549259	2.9743797641264	1	0.0962488223471935	0.31023183201659	X_6553273	6553273	X_8217033	8217033
X_3843271	X	3843271	A_12_P109119	3.21118254290055	3.0701153611324	1	0.086616838893682	-0.293380433738584	X_2949804	2949804	X_4862702	4862702
II_1296443	II	1296443	A_12_P109121	3.13171322538055	2.89905964991557	1	0.0713156957818101	0.266208883009649	II_6368	6368	II_1990551	1990551
V_6526389	V	6526389	A_12_P109124	3.77938994534642	2.9900701564177	1	0.101606029627512	0.317699767097938	V_5699019	5699019	V_9104120	9104120
V_3352971	V	3352971	A_12_P109124	5.39354724257167	3.08129139668773	2	0.0830160448055526	-0.287169409363863	V_2615895	2615895	V_3551664	3551664
I_2260201	I	2260201	A_12_P109126	3.57646322731843	2.75481141565143	1	0.00282716018845136	0.0529911101482655	I_2250505	2250505	I_2284272	2284272
I_2260201	I	2260201	A_12_P109126	3.39668299206723	2.77766262939441	2	0.00282716018845136	0.0529911101482655	I_2250505	2250505	I_2284272	2284272
I_2260201	I	2260201	A_12_P109126	3.22549315516169	2.93872273209022	3	0.00282716018845136	0.0529911101482655	I_2250505	2250505	I_2284272	2284272
I_2260201	I	2260201	A_12_P109126	3.06252587922502	2.87360812331338	4	0.00282716018845136	0.0529911101482655	I_2250505	2250505	I_2284272	2284272
I_2260201	I	2260201	A_12_P109126	2.9074250497492	2.82850382446324	5	0.00282716018845136	0.0529911101482655	I_2250505	2250505	I_2284272	2284272
IV_4755912	IV	4755912	A_12_P109138	4.18907788874138	3.01483943305663	1	0.109336324277945	0.329618983736858	IV_4644715	4644715	IV_5208413	5208413
X_5810100	X	5810100	A_12_P109138	3.28147210979188	2.97563282483716	2	0.0783808762792864	-0.279084064025973	X_4536045	4536045	X_6325253	6325253
I_1234526	I	1234526	A_12_P109141	3.87562673665231	3.00573711130224	1	0.040555194353858	0.200748923380488	I_865340	865340	I_1315291	1315291
II_14243104	II	14243104	A_12_P109152	3.35502526038394	3.03849774456754	1	0.0870295242112248	0.294078507737374	II_14182281	14182281	II_15274701	15274701
II_13580247	II	13580247	A_12_P109155	24.065639635052	3.01725923579786	1	0.482853391534005	-0.692687936772954	II_13573967	13573967	II_13663523	13663523
IV_2571028	IV	2571028	A_12_P109158	4.8817153555256	2.98316189748682	1	0.131218927545736	-0.361100611010094	IV_2425163	2425163	IV_2881003	2881003
II_13446733	II	13446733	A_12_P109161	5.04180475230143	3.04946106061449	1	0.131346309569747	0.361275839423382	II_13374406	13374406	II_13578819	13578819
V_7093878	V	7093878	A_12_P109162	7.00783649670328	3.10757107967914	1	0.164798064465733	-0.404674682493832	V_6789374	6789374	V_7666834	7666834
III_1984767	III	1984767	A_12_P109179	4.14371759066136	3.02558243849528	1	0.110880191802523	-0.331917793048596	III_1797606	1797606	III_2158521	2158521
II_4636342	II	4636342	A_12_P109182	3.08527086947536	2.94810075892342	1	0.0845062615831681	0.289784015537885	II_4121532	4121532	II_5061727	5061727
X_4322768	X	4322768	A_12_P109184	3.89778750211715	3.10524850235312	1	0.104114520974609	-0.321651539195125	X_3814926	3814926	X_5569019	5569019
X_5714088	X	5714088	A_12_P109188	4.12532968306123	3.0138609980139	1	0.109373644977381	-0.329675234765632	X_5615449	5615449	X_5993800	5993800
III_12501901	III	12501901	A_12_P109190	2.95406288054534	2.90407060709961	1	0.084836967670841	-0.290295345960573	III_12364641	12364641	III_12806910	12806910
IV_12079110	IV	12079110	A_12_P109195	3.37069504253128	2.99333067868922	1	0.0910661936968541	-0.300821293030048	IV_9987122	9987122	IV_12801753	12801753
X_4758185	X	4758185	A_12_P109198	7.23158124629561	2.94000186457264	1	0.182684077548725	0.426069385295582	X_4630882	4630882	X_5291269	5291269
V_3426856	V	3426856	A_12_P109198	5.72723342796993	3.09470916201193	2	0.110378309978343	0.331185909680548	V_3282813	3282813	V_3680651	3680651
IV_8179349	IV	8179349	A_12_P109198	3.7064808272356	2.97677025202996	3	0.053573212583995	-0.230729872665137	IV_7124538	7124538	IV_9987122	9987122
V_2819815	V	2819815	A_12_P109200	3.78747161720787	2.96398654420275	1	0.11953603702231	-0.34447570481041	V_2629324	2629324	V_3897200	3897200
I_9631422	I	9631422	A_12_P109200	3.03967356711337	2.93799492076337	2	0.0792235523469763	0.28043765482234	I_7969987	7969987	I_10826560	10826560
III_10040615	III	10040615	A_12_P109202	8.89636262151838	3.09769775205748	1	0.226923852297536	0.474864884212266	III_9927329	9927329	III_10344441	10344441
II_14282734	II	14282734	A_12_P109215	32.9172992264654	3.12601818556624	1	0.596847979859595	-0.770126105894336	II_14281777	14281777	II_14391450	14391450
II_3093405	II	3093405	A_12_P109224	9.2807357557727	3.06224445246999	1	0.266610666366454	0.514398750863583	II_3051982	3051982	II_3199009	3199009
X_5810100	X	5810100	A_12_P109225	7.6673910960409	3.07723500705182	1	0.194976236849407	0.440170388836919	X_4171941	4171941	X_5993800	5993800
IV_12672698	IV	12672698	A_12_P109225	3.29936856939992	3.05383289460378	2	0.042052360808864	-0.204420841775501	IV_12013372	12013372	IV_12963367	12963367
I_3704521	I	3704521	A_12_P109236	3.31707612054884	3.16269584440088	1	0.0367846185105638	-0.19118909150004	I_3594690	3594690	I_4650804	4650804
V_10220682	V	10220682	A_12_P109239	3.48542086267909	3.06776446019892	1	0.09888216563805	-0.313405410292265	V_9005254	9005254	V_11671299	11671299
IV_14376301	IV	14376301	A_12_P109247	6.54629327751195	3.03877533276938	1	0.167731764213092	0.408260759144245	IV_14106284	14106284	IV_15023091	15023091
V_19432194	V	19432194	A_12_P109248	17.665969601331	3.09469934002863	1	0.401095699253135	-0.633313340745346	V_19432130	19432130	V_19512349	19512349
IV_3958558	IV	3958558	A_12_P109248	3.38258572026985	3.0096422611193	2	0.113325935619151	-0.335408316844994	IV_3840091	3840091	IV_5163110	5163110
III_3281674	III	3281674	A_12_P109268	4.21614653970811	2.94252964918079	1	0.11163748463438	0.333069605472355	III_2896298	2896298	III_3419646	3419646
II_14071163	II	14071163	A_12_P109283	3.335724279545	2.96762243200229	1	0.0881263388942499	-0.295925810281078	II_13894030	13894030	II_14465917	14465917
I_12884357	I	12884357	A_12_P109284	54.2630717970666	3.23935865368871	1	0.800549581427625	0.891600433269552	I_12883880	12883880	I_12937472	12937472
IV_3798053	IV	3798053	A_12_P109285	3.7492384718327	3.12381377122729	1	0.102572552053582	-0.319260773762309	IV_3658073	3658073	IV_4359912	4359912
V_20113987	V	20113987	A_12_P109292	8.82592171852648	3.01906272837534	1	0.21999352046625	-0.467557390508686	V_19900018	19900018	V_20234502	20234502
II_13261146	II	13261146	A_12_P109293	3.57741570810814	2.95354751485321	1	0.094956091040455	0.307172757780499	II_13163270	13163270	II_13578819	13578819
IV_9987122	IV	9987122	A_12_P109295	4.90096633441277	3.01855853342226	1	0.12802317914599	-0.356639677827476	IV_6578183	6578183	IV_11565289	11565289
V_5235073	V	5235073	A_12_P109300	6.31503743948192	3.05090091509235	1	0.164087275353618	-0.401587074604855	V_4964433	4964433	V_5699019	5699019
II_13225059	II	13225059	A_12_P109310	3.46806746501139	2.99994419768978	1	0.0909360488005912	0.300606260688908	II_12976495	12976495	II_13738578	13738578
IV_2464122	IV	2464122	A_12_P109311	7.52012036503471	3.13150608359589	1	0.206261061987247	-0.452633140145309	IV_2378272	2378272	IV_2650991	2650991
II_10856826	II	10856826	A_12_P109312	19.0182313020273	2.98068526254855	1	0.421502564402946	-0.647187457293788	II_10595652	10595652	II_11408416	11408416
V_12414380	V	12414380	A_12_P109313	3.98487139165985	3.09299452569017	1	0.120261440814795	0.345555383107877	V_11806498	11806498	V_16859250	16859250
X_5361887	X	5361887	A_12_P109338	3.5944046327614	3.10136748109361	1	0.0951118506728162	0.307430744937353	X_4630882	4630882	X_5949176	5949176
X_12236381	X	12236381	A_12_P109339	8.74381257751332	3.06161154082011	1	0.220531488713127	-0.468128719710803	X_12206293	12206293	X_12932361	12932361
X_4862702	X	4862702	A_12_P109339	9.26545278293769	3.03689886063438	2	0.0716565146222645	0.266844233062998	X_3991931	3991931	X_5176675	5176675
II_5826747	II	5826747	A_12_P109355	14.2022490337368	2.90172181544206	1	0.333102768307123	-0.577072082209386	II_5061639	5061639	II_6366860	6366860
III_9758797	III	9758797	A_12_P109362	2.92773669129489	2.91522458309373	1	0.0809121300984232	0.283554666293908	III_9130830	9130830	III_11052616	11052616
V_5614890	V	5614890	A_12_P109362	3.0525434163163	2.8604175762522	2	0.0667488455444439	0.257544251507223	V_5149493	5149493	V_7666834	7666834
X_5526747	X	5526747	A_12_P109364	3.10400761946074	3.01879859700755	1	0.0835003223040653	0.288054097426666	X_3946591	3946591	X_5949176	5949176
X_5526747	X	5526747	A_12_P109372	3.12738096106502	2.90441744842971	1	0.0841010406262819	0.28908840043117	X_4483054	4483054	X_6159202	6159202
II_2331932	II	2331932	A_12_P109383	47.9930962407821	3.12604041332241	1	0.587073211977147	-0.766000394230549	II_2316511	2316511	II_2334376	2334376
II_2285362	II	2285362	A_12_P109383	6.0455710956869	2.845844701666	2	0.587050430717026	-0.765981434326918	II_2131538	2131538	II_2382488	2382488
X_2616114	X	2616114	A_12_P109393	5.25549845753555	3.05828103064871	1	0.142550729150619	0.376346837937154	X_2538424	2538424	X_2895874	2895874
II_7946758	II	7946758	A_12_P109402	13.3312661776125	3.16803874417804	1	0.31745888495931	-0.56166029608524	II_7161299	7161299	II_9430890	9430890
X_4862702	X	4862702	A_12_P109405	4.15578239925858	3.03418334572723	1	0.108518560051971	0.328384002937075	X_4483054	4483054	X_7002637	7002637
[truncated: 2,327 more rows]
