# Supplementary material for: A nematode-specific gene underlies bleomycin-response variation in Caenorhabditis elegans
Source: bioRxiv preprint, doi:10.1101/565218, version 2 (2019-05-14)
Supplement: File S19 [file 565218_file12.csv]

marker	CHROM	POS	trait	log10p	BF	aboveBF	startPOS	peakPOS	endPOS
I_1761	I	1761	value	0.327618701012513	3.98881749469276	0	NA	NA	NA
I_2138	I	2138	value	1.26749862047281	3.98881749469276	0	NA	NA	NA
I_2618	I	2618	value	0.208720314911864	3.98881749469276	0	NA	NA	NA
I_3048	I	3048	value	0.590259017612095	3.98881749469276	0	NA	NA	NA
I_5317	I	5317	value	1.03704615916232	3.98881749469276	0	NA	NA	NA
I_6689	I	6689	value	0.216254541721721	3.98881749469276	0	NA	NA	NA
I_9621	I	9621	value	0.815908668848989	3.98881749469276	0	NA	NA	NA
I_15024	I	15024	value	0.424244554682401	3.98881749469276	0	NA	NA	NA
I_15858	I	15858	value	0.180859846688832	3.98881749469276	0	NA	NA	NA
I_17509	I	17509	value	0.0613392682518113	3.98881749469276	0	NA	NA	NA
I_18679	I	18679	value	0.179017495053208	3.98881749469276	0	NA	NA	NA
I_23398	I	23398	value	0.440061312596141	3.98881749469276	0	NA	NA	NA
I_24495	I	24495	value	0.105977416250736	3.98881749469276	0	NA	NA	NA
I_30670	I	30670	value	0.431130148813152	3.98881749469276	0	NA	NA	NA
I_41151	I	41151	value	0.9367392681974	3.98881749469276	0	NA	NA	NA
I_41672	I	41672	value	0.0613392682518113	3.98881749469276	0	NA	NA	NA
I_46655	I	46655	value	1.18381964266212	3.98881749469276	0	NA	NA	NA
I_47642	I	47642	value	0.815908668848989	3.98881749469276	0	NA	NA	NA
I_57096	I	57096	value	0.566979250183505	3.98881749469276	0	NA	NA	NA
I_62576	I	62576	value	1.13122322700384	3.98881749469276	0	NA	NA	NA
I_66407	I	66407	value	0.140730087921809	3.98881749469276	0	NA	NA	NA
I_67321	I	67321	value	0.327618701012513	3.98881749469276	0	NA	NA	NA
I_76311	I	76311	value	0.815908668848989	3.98881749469276	0	NA	NA	NA
I_76506	I	76506	value	0.0473081549180152	3.98881749469276	0	NA	NA	NA
I_80133	I	80133	value	0.376712437263529	3.98881749469276	0	NA	NA	NA
I_96117	I	96117	value	0.272578348708117	3.98881749469276	0	NA	NA	NA
I_101122	I	101122	value	0.264655877074741	3.98881749469276	0	NA	NA	NA
I_107175	I	107175	value	1.18381964266212	3.98881749469276	0	NA	NA	NA
I_107916	I	107916	value	0.802915032756742	3.98881749469276	0	NA	NA	NA
I_108121	I	108121	value	0.216254541721721	3.98881749469276	0	NA	NA	NA
I_109460	I	109460	value	0.218008304851636	3.98881749469276	0	NA	NA	NA
I_116338	I	116338	value	0.0706215253108709	3.98881749469276	0	NA	NA	NA
I_121505	I	121505	value	0.355521711520294	3.98881749469276	0	NA	NA	NA
I_123315	I	123315	value	0.0189529746701096	3.98881749469276	0	NA	NA	NA
I_130380	I	130380	value	0.424244554682401	3.98881749469276	0	NA	NA	NA
I_135132	I	135132	value	0.815908668848989	3.98881749469276	0	NA	NA	NA
I_135309	I	135309	value	0.216254541721721	3.98881749469276	0	NA	NA	NA
I_135382	I	135382	value	0.349488546343817	3.98881749469276	0	NA	NA	NA
I_141329	I	141329	value	0.134789519914867	3.98881749469276	0	NA	NA	NA
I_148495	I	148495	value	0.832286222100524	3.98881749469276	0	NA	NA	NA
I_157815	I	157815	value	0.327618701012513	3.98881749469276	0	NA	NA	NA
I_161015	I	161015	value	0.338059902256319	3.98881749469276	0	NA	NA	NA
I_161490	I	161490	value	0.0613392682518113	3.98881749469276	0	NA	NA	NA
I_176037	I	176037	value	0.419091016438086	3.98881749469276	0	NA	NA	NA
I_178649	I	178649	value	0.484121919650293	3.98881749469276	0	NA	NA	NA
I_179783	I	179783	value	0.424244554682401	3.98881749469276	0	NA	NA	NA
I_184283	I	184283	value	0.327618701012513	3.98881749469276	0	NA	NA	NA
I_185161	I	185161	value	0.358226109155603	3.98881749469276	0	NA	NA	NA
I_189636	I	189636	value	0.464690157544406	3.98881749469276	0	NA	NA	NA
I_190158	I	190158	value	1.18381964266212	3.98881749469276	0	NA	NA	NA
I_196881	I	196881	value	0.853821783699461	3.98881749469276	0	NA	NA	NA
I_209103	I	209103	value	0.00489577427430978	3.98881749469276	0	NA	NA	NA
I_210521	I	210521	value	0.327618701012513	3.98881749469276	0	NA	NA	NA
I_218124	I	218124	value	0.658791554866386	3.98881749469276	0	NA	NA	NA
I_218475	I	218475	value	0.423125779007141	3.98881749469276	0	NA	NA	NA
I_221965	I	221965	value	0.151407935741046	3.98881749469276	0	NA	NA	NA
I_233154	I	233154	value	1.13242413745149	3.98881749469276	0	NA	NA	NA
I_246532	I	246532	value	0.419091016438086	3.98881749469276	0	NA	NA	NA
I_247091	I	247091	value	0.327618701012513	3.98881749469276	0	NA	NA	NA
I_247731	I	247731	value	0.815908668848989	3.98881749469276	0	NA	NA	NA
I_249864	I	249864	value	0.9367392681974	3.98881749469276	0	NA	NA	NA
I_250871	I	250871	value	0.216254541721721	3.98881749469276	0	NA	NA	NA
I_254257	I	254257	value	0.304938730310936	3.98881749469276	0	NA	NA	NA
I_264954	I	264954	value	0.401915796004158	3.98881749469276	0	NA	NA	NA
I_268168	I	268168	value	0.327618701012513	3.98881749469276	0	NA	NA	NA
I_269566	I	269566	value	0.815908668848989	3.98881749469276	0	NA	NA	NA
I_274805	I	274805	value	0.464698793562526	3.98881749469276	0	NA	NA	NA
I_276638	I	276638	value	0.249122488861628	3.98881749469276	0	NA	NA	NA
I_278655	I	278655	value	0.249037386143162	3.98881749469276	0	NA	NA	NA
I_279097	I	279097	value	0.420429617222964	3.98881749469276	0	NA	NA	NA
I_283694	I	283694	value	0.0800876466968984	3.98881749469276	0	NA	NA	NA
I_288732	I	288732	value	0.327618701012513	3.98881749469276	0	NA	NA	NA
I_291349	I	291349	value	0.815908668848989	3.98881749469276	0	NA	NA	NA
I_293097	I	293097	value	0.154773244692148	3.98881749469276	0	NA	NA	NA
I_302045	I	302045	value	0.216254541721721	3.98881749469276	0	NA	NA	NA
I_303755	I	303755	value	0.198241036432474	3.98881749469276	0	NA	NA	NA
I_314248	I	314248	value	0.0613392682518113	3.98881749469276	0	NA	NA	NA
I_315018	I	315018	value	0.327618701012513	3.98881749469276	0	NA	NA	NA
I_324785	I	324785	value	0.424244554682401	3.98881749469276	0	NA	NA	NA
I_326319	I	326319	value	0.137395470304609	3.98881749469276	0	NA	NA	NA
I_328072	I	328072	value	0.529559319972408	3.98881749469276	0	NA	NA	NA
I_329968	I	329968	value	0.242070552743038	3.98881749469276	0	NA	NA	NA
I_341457	I	341457	value	0.327618701012513	3.98881749469276	0	NA	NA	NA
I_344201	I	344201	value	0.321311967963771	3.98881749469276	0	NA	NA	NA
I_346109	I	346109	value	0.127974714603088	3.98881749469276	0	NA	NA	NA
I_346146	I	346146	value	0.966146321395301	3.98881749469276	0	NA	NA	NA
I_350439	I	350439	value	0.416935591862364	3.98881749469276	0	NA	NA	NA
I_351375	I	351375	value	0.0250603914905118	3.98881749469276	0	NA	NA	NA
I_351694	I	351694	value	0.0558182613120638	3.98881749469276	0	NA	NA	NA
I_351707	I	351707	value	0.141096178432465	3.98881749469276	0	NA	NA	NA
I_353535	I	353535	value	0.484121919650293	3.98881749469276	0	NA	NA	NA
I_362836	I	362836	value	0.0800876466968984	3.98881749469276	0	NA	NA	NA
I_366559	I	366559	value	0.802915032756742	3.98881749469276	0	NA	NA	NA
I_368296	I	368296	value	0.294155761534075	3.98881749469276	0	NA	NA	NA
I_370339	I	370339	value	0.424244554682401	3.98881749469276	0	NA	NA	NA
I_374217	I	374217	value	0.0596389862888187	3.98881749469276	0	NA	NA	NA
I_374234	I	374234	value	0.110467912584774	3.98881749469276	0	NA	NA	NA
I_374244	I	374244	value	0.488969234539649	3.98881749469276	0	NA	NA	NA
I_376143	I	376143	value	0.935698604394414	3.98881749469276	0	NA	NA	NA
I_376287	I	376287	value	0.242323699892997	3.98881749469276	0	NA	NA	NA
I_377110	I	377110	value	0.00438801559905581	3.98881749469276	0	NA	NA	NA
I_377706	I	377706	value	0.930949250623012	3.98881749469276	0	NA	NA	NA
I_377866	I	377866	value	0.28093616961814	3.98881749469276	0	NA	NA	NA
I_386388	I	386388	value	0.216666040511272	3.98881749469276	0	NA	NA	NA
I_390711	I	390711	value	0.327618701012513	3.98881749469276	0	NA	NA	NA
I_390716	I	390716	value	0.180859846688832	3.98881749469276	0	NA	NA	NA
I_392242	I	392242	value	0.935698604394414	3.98881749469276	0	NA	NA	NA
I_395423	I	395423	value	0.850862010408913	3.98881749469276	0	NA	NA	NA
I_402207	I	402207	value	0.0613392682518113	3.98881749469276	0	NA	NA	NA
I_402876	I	402876	value	0.085163819954193	3.98881749469276	0	NA	NA	NA
I_404748	I	404748	value	0.0531508437573529	3.98881749469276	0	NA	NA	NA
I_405121	I	405121	value	0.0790751984687567	3.98881749469276	0	NA	NA	NA
I_405814	I	405814	value	0.516335710313527	3.98881749469276	0	NA	NA	NA
I_406735	I	406735	value	0.521786803117744	3.98881749469276	0	NA	NA	NA
I_407858	I	407858	value	0.114776087522828	3.98881749469276	0	NA	NA	NA
I_408114	I	408114	value	0.525126356078946	3.98881749469276	0	NA	NA	NA
I_408210	I	408210	value	0.269614619450859	3.98881749469276	0	NA	NA	NA
I_408281	I	408281	value	0.130512871803121	3.98881749469276	0	NA	NA	NA
I_408440	I	408440	value	0.0640954771913949	3.98881749469276	0	NA	NA	NA
I_408861	I	408861	value	0.764831888015718	3.98881749469276	0	NA	NA	NA
I_409624	I	409624	value	0.0856445406288671	3.98881749469276	0	NA	NA	NA
I_411004	I	411004	value	0.495501338844182	3.98881749469276	0	NA	NA	NA
I_411133	I	411133	value	0.134489142828427	3.98881749469276	0	NA	NA	NA
I_412109	I	412109	value	0.0423892801921802	3.98881749469276	0	NA	NA	NA
I_413610	I	413610	value	0.850862010408913	3.98881749469276	0	NA	NA	NA
I_415445	I	415445	value	0.327618701012513	3.98881749469276	0	NA	NA	NA
I_416703	I	416703	value	0.424244554682401	3.98881749469276	0	NA	NA	NA
I_417076	I	417076	value	0.935698604394414	3.98881749469276	0	NA	NA	NA
I_418818	I	418818	value	1.67597460762786	3.98881749469276	0	NA	NA	NA
I_423010	I	423010	value	0.0455029131026155	3.98881749469276	0	NA	NA	NA
I_425626	I	425626	value	0.495501338844182	3.98881749469276	0	NA	NA	NA
I_428363	I	428363	value	0.0613392682518113	3.98881749469276	0	NA	NA	NA
I_432210	I	432210	value	0.420429617222964	3.98881749469276	0	NA	NA	NA
I_435381	I	435381	value	0.293441572316788	3.98881749469276	0	NA	NA	NA
I_436452	I	436452	value	0.935698604394414	3.98881749469276	0	NA	NA	NA
I_443056	I	443056	value	0.0455029131026155	3.98881749469276	0	NA	NA	NA
I_443148	I	443148	value	0.957432212559503	3.98881749469276	0	NA	NA	NA
I_444763	I	444763	value	0.327618701012513	3.98881749469276	0	NA	NA	NA
I_446900	I	446900	value	0.349488546343817	3.98881749469276	0	NA	NA	NA
I_450866	I	450866	value	0.0513994972454666	3.98881749469276	0	NA	NA	NA
I_455118	I	455118	value	0.155731948746878	3.98881749469276	0	NA	NA	NA
I_456095	I	456095	value	0.7803916031854	3.98881749469276	0	NA	NA	NA
I_458431	I	458431	value	0.143296424814679	3.98881749469276	0	NA	NA	NA
I_458637	I	458637	value	0.675287241090658	3.98881749469276	0	NA	NA	NA
I_458638	I	458638	value	0.506223660949016	3.98881749469276	0	NA	NA	NA
I_462336	I	462336	value	0.376821238121793	3.98881749469276	0	NA	NA	NA
I_463909	I	463909	value	0.362841156128766	3.98881749469276	0	NA	NA	NA
I_464858	I	464858	value	0.3863262049029	3.98881749469276	0	NA	NA	NA
I_466067	I	466067	value	0.18036678066756	3.98881749469276	0	NA	NA	NA
I_474595	I	474595	value	1.00451194539657	3.98881749469276	0	NA	NA	NA
I_476760	I	476760	value	0.830114177659886	3.98881749469276	0	NA	NA	NA
I_476774	I	476774	value	0.362841156128766	3.98881749469276	0	NA	NA	NA
I_483392	I	483392	value	0.416261141809437	3.98881749469276	0	NA	NA	NA
I_485515	I	485515	value	0.30311269432943	3.98881749469276	0	NA	NA	NA
I_486346	I	486346	value	0.270743094378563	3.98881749469276	0	NA	NA	NA
I_486839	I	486839	value	0.182709129097762	3.98881749469276	0	NA	NA	NA
I_490260	I	490260	value	1.13122322700384	3.98881749469276	0	NA	NA	NA
I_491763	I	491763	value	0.503564025562924	3.98881749469276	0	NA	NA	NA
I_495881	I	495881	value	0.0613392682518113	3.98881749469276	0	NA	NA	NA
I_500606	I	500606	value	0.229098744863276	3.98881749469276	0	NA	NA	NA
I_502878	I	502878	value	1.01525223860119	3.98881749469276	0	NA	NA	NA
I_503555	I	503555	value	0.696958517380585	3.98881749469276	0	NA	NA	NA
I_504213	I	504213	value	0.218816701695429	3.98881749469276	0	NA	NA	NA
I_510610	I	510610	value	0.54408031833841	3.98881749469276	0	NA	NA	NA
I_512439	I	512439	value	1.01061136025764	3.98881749469276	0	NA	NA	NA
I_513855	I	513855	value	0.0964095639524735	3.98881749469276	0	NA	NA	NA
I_519493	I	519493	value	0.274019497046362	3.98881749469276	0	NA	NA	NA
I_520173	I	520173	value	0.0753659613876988	3.98881749469276	0	NA	NA	NA
I_524663	I	524663	value	0.229098744863276	3.98881749469276	0	NA	NA	NA
I_525516	I	525516	value	0.54408031833841	3.98881749469276	0	NA	NA	NA
I_540274	I	540274	value	0.00730007603813935	3.98881749469276	0	NA	NA	NA
I_543011	I	543011	value	0.424244554682401	3.98881749469276	0	NA	NA	NA
I_543021	I	543021	value	0.600703059195489	3.98881749469276	0	NA	NA	NA
I_546886	I	546886	value	0.0220768866950566	3.98881749469276	0	NA	NA	NA
I_552936	I	552936	value	0.229098744863276	3.98881749469276	0	NA	NA	NA
I_558255	I	558255	value	0.11204181736069	3.98881749469276	0	NA	NA	NA
I_558261	I	558261	value	0.419091016438086	3.98881749469276	0	NA	NA	NA
I_558916	I	558916	value	0.0367139575100562	3.98881749469276	0	NA	NA	NA
I_559301	I	559301	value	0.127978395926288	3.98881749469276	0	NA	NA	NA
I_562960	I	562960	value	0.424244554682401	3.98881749469276	0	NA	NA	NA
I_564150	I	564150	value	1.00451194539657	3.98881749469276	0	NA	NA	NA
I_565650	I	565650	value	0.671251079282182	3.98881749469276	0	NA	NA	NA
I_565653	I	565653	value	0.684165751601803	3.98881749469276	0	NA	NA	NA
I_566030	I	566030	value	0.54408031833841	3.98881749469276	0	NA	NA	NA
I_567072	I	567072	value	0.0308679806986536	3.98881749469276	0	NA	NA	NA
I_568344	I	568344	value	0.53494290593706	3.98881749469276	0	NA	NA	NA
I_568345	I	568345	value	0.486857798994279	3.98881749469276	0	NA	NA	NA
I_568466	I	568466	value	0.23356782600784	3.98881749469276	0	NA	NA	NA
I_568511	I	568511	value	0.362841156128766	3.98881749469276	0	NA	NA	NA
I_575190	I	575190	value	2.70843926045398	3.98881749469276	0	NA	NA	NA
I_575526	I	575526	value	0.0428720794512841	3.98881749469276	0	NA	NA	NA
I_580527	I	580527	value	0.169297373174484	3.98881749469276	0	NA	NA	NA
I_584625	I	584625	value	0.247118464159675	3.98881749469276	0	NA	NA	NA
I_589613	I	589613	value	0.111523160571379	3.98881749469276	0	NA	NA	NA
I_589629	I	589629	value	0.274019497046362	3.98881749469276	0	NA	NA	NA
I_590598	I	590598	value	0.466428506288145	3.98881749469276	0	NA	NA	NA
I_592212	I	592212	value	1.00451194539657	3.98881749469276	0	NA	NA	NA
I_596501	I	596501	value	0.232566579081386	3.98881749469276	0	NA	NA	NA
I_605529	I	605529	value	0.348637489880349	3.98881749469276	0	NA	NA	NA
I_605821	I	605821	value	0.466428506288145	3.98881749469276	0	NA	NA	NA
I_605959	I	605959	value	0.241978805503517	3.98881749469276	0	NA	NA	NA
I_609401	I	609401	value	0.725935700740669	3.98881749469276	0	NA	NA	NA
I_611152	I	611152	value	0.461408280588373	3.98881749469276	0	NA	NA	NA
I_611560	I	611560	value	0.507971234113713	3.98881749469276	0	NA	NA	NA
I_612243	I	612243	value	0.356040630751631	3.98881749469276	0	NA	NA	NA
I_614374	I	614374	value	1.00451194539657	3.98881749469276	0	NA	NA	NA
I_615712	I	615712	value	0.976884258776433	3.98881749469276	0	NA	NA	NA
I_616548	I	616548	value	0.74968335397272	3.98881749469276	0	NA	NA	NA
I_617381	I	617381	value	0.251405360363632	3.98881749469276	0	NA	NA	NA
I_622070	I	622070	value	0.182709129097762	3.98881749469276	0	NA	NA	NA
I_623487	I	623487	value	0.300240070910228	3.98881749469276	0	NA	NA	NA
I_624391	I	624391	value	0.205799519281152	3.98881749469276	0	NA	NA	NA
I_625943	I	625943	value	0.384604286491305	3.98881749469276	0	NA	NA	NA
I_625984	I	625984	value	0.0186654058644097	3.98881749469276	0	NA	NA	NA
I_626053	I	626053	value	0.199854370392134	3.98881749469276	0	NA	NA	NA
I_626269	I	626269	value	1.35772373938696	3.98881749469276	0	NA	NA	NA
I_626411	I	626411	value	0.553685633427702	3.98881749469276	0	NA	NA	NA
I_627694	I	627694	value	0.0511721869469258	3.98881749469276	0	NA	NA	NA
I_627771	I	627771	value	1.21670563536368	3.98881749469276	0	NA	NA	NA
I_627798	I	627798	value	0.51333862845865	3.98881749469276	0	NA	NA	NA
I_628243	I	628243	value	0.670102555050211	3.98881749469276	0	NA	NA	NA
I_629001	I	629001	value	1.30219120380924	3.98881749469276	0	NA	NA	NA
I_629861	I	629861	value	0.307627011337837	3.98881749469276	0	NA	NA	NA
I_630400	I	630400	value	0.182709129097762	3.98881749469276	0	NA	NA	NA
I_630403	I	630403	value	0.227142501704692	3.98881749469276	0	NA	NA	NA
I_630429	I	630429	value	0.60868110468985	3.98881749469276	0	NA	NA	NA
I_630511	I	630511	value	0.0949472546055253	3.98881749469276	0	NA	NA	NA
I_631704	I	631704	value	1.32048686052565	3.98881749469276	0	NA	NA	NA
I_633161	I	633161	value	0.0476108503459369	3.98881749469276	0	NA	NA	NA
I_637219	I	637219	value	0.190467920150454	3.98881749469276	0	NA	NA	NA
I_637286	I	637286	value	0.0509014557435428	3.98881749469276	0	NA	NA	NA
I_637363	I	637363	value	0.1479231494654	3.98881749469276	0	NA	NA	NA
I_637670	I	637670	value	1.00451194539657	3.98881749469276	0	NA	NA	NA
I_638908	I	638908	value	0.182709129097762	3.98881749469276	0	NA	NA	NA
I_639028	I	639028	value	0.348637489880349	3.98881749469276	0	NA	NA	NA
I_639338	I	639338	value	0.209522282327009	3.98881749469276	0	NA	NA	NA
I_640375	I	640375	value	1.10793571697949	3.98881749469276	0	NA	NA	NA
I_641946	I	641946	value	0.291253800564381	3.98881749469276	0	NA	NA	NA
I_643979	I	643979	value	0.1479231494654	3.98881749469276	0	NA	NA	NA
I_644083	I	644083	value	0.743443965040146	3.98881749469276	0	NA	NA	NA
I_644287	I	644287	value	0.0509014557435428	3.98881749469276	0	NA	NA	NA
I_644684	I	644684	value	0.182709129097762	3.98881749469276	0	NA	NA	NA
I_648291	I	648291	value	1.10017139429115	3.98881749469276	0	NA	NA	NA
I_649392	I	649392	value	0.703986073371165	3.98881749469276	0	NA	NA	NA
I_653100	I	653100	value	1.22997135607187	3.98881749469276	0	NA	NA	NA
I_654322	I	654322	value	0.182709129097762	3.98881749469276	0	NA	NA	NA
I_656214	I	656214	value	0.1479231494654	3.98881749469276	0	NA	NA	NA
I_656876	I	656876	value	0.466327570941246	3.98881749469276	0	NA	NA	NA
I_657465	I	657465	value	0.177368456057627	3.98881749469276	0	NA	NA	NA
I_657595	I	657595	value	0.286005986706904	3.98881749469276	0	NA	NA	NA
I_657744	I	657744	value	0.496359312457176	3.98881749469276	0	NA	NA	NA
I_660179	I	660179	value	0.218816701695429	3.98881749469276	0	NA	NA	NA
I_660382	I	660382	value	1.24059012122652	3.98881749469276	0	NA	NA	NA
I_662121	I	662121	value	0.0509014557435428	3.98881749469276	0	NA	NA	NA
I_663623	I	663623	value	0.1479231494654	3.98881749469276	0	NA	NA	NA
I_664678	I	664678	value	0.348637489880349	3.98881749469276	0	NA	NA	NA
I_665507	I	665507	value	0.0770703909316969	3.98881749469276	0	NA	NA	NA
I_671645	I	671645	value	0.866942327860284	3.98881749469276	0	NA	NA	NA
I_671949	I	671949	value	0.218816701695429	3.98881749469276	0	NA	NA	NA
I_672407	I	672407	value	0.118813080947449	3.98881749469276	0	NA	NA	NA
I_673086	I	673086	value	0.0509014557435428	3.98881749469276	0	NA	NA	NA
I_674446	I	674446	value	0.180859846688832	3.98881749469276	0	NA	NA	NA
I_675690	I	675690	value	1.00451194539657	3.98881749469276	0	NA	NA	NA
I_680989	I	680989	value	0.218816701695429	3.98881749469276	0	NA	NA	NA
I_681457	I	681457	value	0.0509014557435428	3.98881749469276	0	NA	NA	NA
I_681784	I	681784	value	0.725347197491127	3.98881749469276	0	NA	NA	NA
I_681902	I	681902	value	0.266712293258774	3.98881749469276	0	NA	NA	NA
I_690500	I	690500	value	0.362841156128766	3.98881749469276	0	NA	NA	NA
I_691145	I	691145	value	0.101775721783529	3.98881749469276	0	NA	NA	NA
I_691327	I	691327	value	0.828412418575818	3.98881749469276	0	NA	NA	NA
I_691329	I	691329	value	1.04938437641553	3.98881749469276	0	NA	NA	NA
I_691447	I	691447	value	0.0655408908884842	3.98881749469276	0	NA	NA	NA
I_692532	I	692532	value	1.07433222118113	3.98881749469276	0	NA	NA	NA
I_694181	I	694181	value	0.762680475997783	3.98881749469276	0	NA	NA	NA
I_694454	I	694454	value	0.126775977640421	3.98881749469276	0	NA	NA	NA
I_694666	I	694666	value	0.182709129097762	3.98881749469276	0	NA	NA	NA
I_695452	I	695452	value	0.444601700773491	3.98881749469276	0	NA	NA	NA
I_695819	I	695819	value	0.249472132965952	3.98881749469276	0	NA	NA	NA
I_697632	I	697632	value	0.0250603914905118	3.98881749469276	0	NA	NA	NA
I_697676	I	697676	value	0.227061788303007	3.98881749469276	0	NA	NA	NA
I_700876	I	700876	value	0.70356283993375	3.98881749469276	0	NA	NA	NA
I_701402	I	701402	value	0.879870409002743	3.98881749469276	0	NA	NA	NA
I_705075	I	705075	value	1.2365544992456	3.98881749469276	0	NA	NA	NA
I_705454	I	705454	value	0.416261141809437	3.98881749469276	0	NA	NA	NA
I_706128	I	706128	value	1.00451194539657	3.98881749469276	0	NA	NA	NA
I_707337	I	707337	value	0.172131004032105	3.98881749469276	0	NA	NA	NA
I_708780	I	708780	value	0.223408553146073	3.98881749469276	0	NA	NA	NA
I_709616	I	709616	value	0.182709129097762	3.98881749469276	0	NA	NA	NA
I_710637	I	710637	value	0.362841156128766	3.98881749469276	0	NA	NA	NA
I_711341	I	711341	value	0.881330038126909	3.98881749469276	0	NA	NA	NA
I_711452	I	711452	value	0.0818276476906662	3.98881749469276	0	NA	NA	NA
I_711518	I	711518	value	0.0759465974202976	3.98881749469276	0	NA	NA	NA
I_712219	I	712219	value	0.273161765815364	3.98881749469276	0	NA	NA	NA
I_714878	I	714878	value	0.898718629194829	3.98881749469276	0	NA	NA	NA
I_715142	I	715142	value	0.161237980676775	3.98881749469276	0	NA	NA	NA
I_715457	I	715457	value	1.00451194539657	3.98881749469276	0	NA	NA	NA
I_717063	I	717063	value	2.10652969758031	3.98881749469276	0	NA	NA	NA
I_718514	I	718514	value	0.182709129097762	3.98881749469276	0	NA	NA	NA
I_719322	I	719322	value	0.362841156128766	3.98881749469276	0	NA	NA	NA
I_720806	I	720806	value	0.629676144728757	3.98881749469276	0	NA	NA	NA
I_721214	I	721214	value	0.424244554682401	3.98881749469276	0	NA	NA	NA
I_721627	I	721627	value	0.354231955784347	3.98881749469276	0	NA	NA	NA
I_721723	I	721723	value	0.416261141809437	3.98881749469276	0	NA	NA	NA
I_724070	I	724070	value	0.441135278021891	3.98881749469276	0	NA	NA	NA
I_724309	I	724309	value	0.196262193222073	3.98881749469276	0	NA	NA	NA
I_727187	I	727187	value	0.197390726039347	3.98881749469276	0	NA	NA	NA
I_731196	I	731196	value	0.0617943963726953	3.98881749469276	0	NA	NA	NA
I_739095	I	739095	value	0.431247073384251	3.98881749469276	0	NA	NA	NA
I_740617	I	740617	value	0.486857798994279	3.98881749469276	0	NA	NA	NA
I_741382	I	741382	value	1.00451194539657	3.98881749469276	0	NA	NA	NA
I_741541	I	741541	value	0.362841156128766	3.98881749469276	0	NA	NA	NA
I_741668	I	741668	value	1.09361666488599	3.98881749469276	0	NA	NA	NA
I_749831	I	749831	value	0.196764397760877	3.98881749469276	0	NA	NA	NA
I_753232	I	753232	value	0.293422753426652	3.98881749469276	0	NA	NA	NA
I_758192	I	758192	value	0.777231009779428	3.98881749469276	0	NA	NA	NA
I_758742	I	758742	value	0.0613392682518113	3.98881749469276	0	NA	NA	NA
I_759661	I	759661	value	0.889054100683733	3.98881749469276	0	NA	NA	NA
I_765704	I	765704	value	0.0288218432624244	3.98881749469276	0	NA	NA	NA
I_769461	I	769461	value	0.224559180762517	3.98881749469276	0	NA	NA	NA
I_771745	I	771745	value	0.0432935165460769	3.98881749469276	0	NA	NA	NA
I_775905	I	775905	value	1.04938437641553	3.98881749469276	0	NA	NA	NA
I_776747	I	776747	value	0.215490654400749	3.98881749469276	0	NA	NA	NA
I_781671	I	781671	value	0.607733303816568	3.98881749469276	0	NA	NA	NA
I_787304	I	787304	value	0.0194387264948139	3.98881749469276	0	NA	NA	NA
I_790898	I	790898	value	0.0297469078644436	3.98881749469276	0	NA	NA	NA
I_792308	I	792308	value	0.111354316320442	3.98881749469276	0	NA	NA	NA
I_793480	I	793480	value	1.04938437641553	3.98881749469276	0	NA	NA	NA
I_794211	I	794211	value	0.229006323720199	3.98881749469276	0	NA	NA	NA
I_797248	I	797248	value	0.424244554682401	3.98881749469276	0	NA	NA	NA
I_800430	I	800430	value	0.956137377621534	3.98881749469276	0	NA	NA	NA
I_800506	I	800506	value	0.348637489880349	3.98881749469276	0	NA	NA	NA
I_802948	I	802948	value	0.278001662880151	3.98881749469276	0	NA	NA	NA
I_803526	I	803526	value	0.649350939246469	3.98881749469276	0	NA	NA	NA
I_807504	I	807504	value	0.799917932621852	3.98881749469276	0	NA	NA	NA
I_809963	I	809963	value	0.329460716383019	3.98881749469276	0	NA	NA	NA
I_811002	I	811002	value	0.0613392682518113	3.98881749469276	0	NA	NA	NA
I_813764	I	813764	value	0.330276252994024	3.98881749469276	0	NA	NA	NA
I_813791	I	813791	value	1.00451194539657	3.98881749469276	0	NA	NA	NA
I_816631	I	816631	value	0.728107122878678	3.98881749469276	0	NA	NA	NA
I_817538	I	817538	value	0.271358134180071	3.98881749469276	0	NA	NA	NA
I_821465	I	821465	value	0.279047758171911	3.98881749469276	0	NA	NA	NA
I_826956	I	826956	value	0.0705115136269909	3.98881749469276	0	NA	NA	NA
I_827173	I	827173	value	0.398559153252907	3.98881749469276	0	NA	NA	NA
I_833289	I	833289	value	0.756054053464258	3.98881749469276	0	NA	NA	NA
I_835377	I	835377	value	0.194595619878183	3.98881749469276	0	NA	NA	NA
I_836421	I	836421	value	0.610738778028971	3.98881749469276	0	NA	NA	NA
I_836677	I	836677	value	0.195223535999617	3.98881749469276	0	NA	NA	NA
I_843721	I	843721	value	0.196307671826769	3.98881749469276	0	NA	NA	NA
I_846665	I	846665	value	0.851408368886492	3.98881749469276	0	NA	NA	NA
I_847290	I	847290	value	0.0613392682518113	3.98881749469276	0	NA	NA	NA
I_847836	I	847836	value	0.599208512319488	3.98881749469276	0	NA	NA	NA
I_848207	I	848207	value	0.966890897998731	3.98881749469276	0	NA	NA	NA
I_850499	I	850499	value	0.228894258905482	3.98881749469276	0	NA	NA	NA
I_851304	I	851304	value	0.398559153252907	3.98881749469276	0	NA	NA	NA
I_854612	I	854612	value	0.993726110754723	3.98881749469276	0	NA	NA	NA
I_856051	I	856051	value	0.683658706418732	3.98881749469276	0	NA	NA	NA
I_856187	I	856187	value	0.110357010416578	3.98881749469276	0	NA	NA	NA
I_857795	I	857795	value	0.943447057540959	3.98881749469276	0	NA	NA	NA
I_858354	I	858354	value	0.758595676092528	3.98881749469276	0	NA	NA	NA
I_858521	I	858521	value	0.147643442678082	3.98881749469276	0	NA	NA	NA
I_859159	I	859159	value	0.48667789181932	3.98881749469276	0	NA	NA	NA
I_859215	I	859215	value	0.0343925513961028	3.98881749469276	0	NA	NA	NA
I_859259	I	859259	value	0.196462663698106	3.98881749469276	0	NA	NA	NA
I_859446	I	859446	value	0.527257833879229	3.98881749469276	0	NA	NA	NA
I_860014	I	860014	value	0.142295573635014	3.98881749469276	0	NA	NA	NA
I_860921	I	860921	value	0.503668684939477	3.98881749469276	0	NA	NA	NA
I_861397	I	861397	value	1.00451194539657	3.98881749469276	0	NA	NA	NA
I_862378	I	862378	value	0.261916434757638	3.98881749469276	0	NA	NA	NA
I_862469	I	862469	value	0.300872828953779	3.98881749469276	0	NA	NA	NA
I_863025	I	863025	value	0.0966918659442881	3.98881749469276	0	NA	NA	NA
I_863741	I	863741	value	0.332229321225833	3.98881749469276	0	NA	NA	NA
I_863911	I	863911	value	0.482445412696522	3.98881749469276	0	NA	NA	NA
I_865618	I	865618	value	0.421291569168305	3.98881749469276	0	NA	NA	NA
I_865711	I	865711	value	0.272778445813562	3.98881749469276	0	NA	NA	NA
I_866218	I	866218	value	0.974761481899648	3.98881749469276	0	NA	NA	NA
I_866240	I	866240	value	0.200657955697587	3.98881749469276	0	NA	NA	NA
I_866842	I	866842	value	0.473843103354136	3.98881749469276	0	NA	NA	NA
I_866896	I	866896	value	0.397036533528408	3.98881749469276	0	NA	NA	NA
I_867720	I	867720	value	0.342780480612754	3.98881749469276	0	NA	NA	NA
I_868062	I	868062	value	0.261349203445067	3.98881749469276	0	NA	NA	NA
I_868175	I	868175	value	0.398559153252907	3.98881749469276	0	NA	NA	NA
I_868195	I	868195	value	0.00163133404691549	3.98881749469276	0	NA	NA	NA
I_868360	I	868360	value	0.516369835294962	3.98881749469276	0	NA	NA	NA
I_868812	I	868812	value	0.227540887844673	3.98881749469276	0	NA	NA	NA
I_868813	I	868813	value	0.931205806319352	3.98881749469276	0	NA	NA	NA
I_868901	I	868901	value	0.259664422960462	3.98881749469276	0	NA	NA	NA
I_869120	I	869120	value	0.483363426159026	3.98881749469276	0	NA	NA	NA
I_869233	I	869233	value	0.898176864737403	3.98881749469276	0	NA	NA	NA
I_869355	I	869355	value	0.114684205073533	3.98881749469276	0	NA	NA	NA
I_869523	I	869523	value	0.0613392682518113	3.98881749469276	0	NA	NA	NA
I_870392	I	870392	value	0.0601427025325618	3.98881749469276	0	NA	NA	NA
I_870415	I	870415	value	0.748828962523369	3.98881749469276	0	NA	NA	NA
I_870597	I	870597	value	0.463357921033588	3.98881749469276	0	NA	NA	NA
I_870607	I	870607	value	0.426906715613747	3.98881749469276	0	NA	NA	NA
I_870696	I	870696	value	0.795927835534161	3.98881749469276	0	NA	NA	NA
I_870867	I	870867	value	0.214092333383605	3.98881749469276	0	NA	NA	NA
I_871325	I	871325	value	0.135007674477502	3.98881749469276	0	NA	NA	NA
I_871423	I	871423	value	0.00883471561826792	3.98881749469276	0	NA	NA	NA
I_873750	I	873750	value	0.411082091674732	3.98881749469276	0	NA	NA	NA
I_874251	I	874251	value	0.342780480612754	3.98881749469276	0	NA	NA	NA
I_875410	I	875410	value	0.424244554682401	3.98881749469276	0	NA	NA	NA
I_877267	I	877267	value	0.697790327400837	3.98881749469276	0	NA	NA	NA
I_877321	I	877321	value	0.00899942652636605	3.98881749469276	0	NA	NA	NA
I_877864	I	877864	value	0.398124741220862	3.98881749469276	0	NA	NA	NA
I_877962	I	877962	value	0.169252764998622	3.98881749469276	0	NA	NA	NA
I_879002	I	879002	value	0.241575706590386	3.98881749469276	0	NA	NA	NA
I_879096	I	879096	value	0.0607033790865385	3.98881749469276	0	NA	NA	NA
I_879395	I	879395	value	0.224144767434062	3.98881749469276	0	NA	NA	NA
I_882874	I	882874	value	0.0613392682518113	3.98881749469276	0	NA	NA	NA
I_887677	I	887677	value	0.398124741220862	3.98881749469276	0	NA	NA	NA
I_888488	I	888488	value	0.348637489880349	3.98881749469276	0	NA	NA	NA
I_890585	I	890585	value	0.232058337370433	3.98881749469276	0	NA	NA	NA
I_890849	I	890849	value	0.398559153252907	3.98881749469276	0	NA	NA	NA
I_891890	I	891890	value	0.31829813914929	3.98881749469276	0	NA	NA	NA
I_891950	I	891950	value	0.454005942707463	3.98881749469276	0	NA	NA	NA
I_895897	I	895897	value	0.382931919531909	3.98881749469276	0	NA	NA	NA
I_899485	I	899485	value	0.0821948257654063	3.98881749469276	0	NA	NA	NA
I_899500	I	899500	value	0.398559153252907	3.98881749469276	0	NA	NA	NA
I_899605	I	899605	value	0.741107484668211	3.98881749469276	0	NA	NA	NA
I_900852	I	900852	value	0.411082091674732	3.98881749469276	0	NA	NA	NA
I_900992	I	900992	value	0.0541700762648267	3.98881749469276	0	NA	NA	NA
I_902628	I	902628	value	0.177368456057627	3.98881749469276	0	NA	NA	NA
I_907812	I	907812	value	0.340186841845996	3.98881749469276	0	NA	NA	NA
I_908826	I	908826	value	0.476177493622117	3.98881749469276	0	NA	NA	NA
I_913837	I	913837	value	0.305078106389443	3.98881749469276	0	NA	NA	NA
I_917587	I	917587	value	0.387392056574479	3.98881749469276	0	NA	NA	NA
I_918075	I	918075	value	0.196037531615559	3.98881749469276	0	NA	NA	NA
I_923286	I	923286	value	0.60035305682793	3.98881749469276	0	NA	NA	NA
I_927484	I	927484	value	0.304087689404955	3.98881749469276	0	NA	NA	NA
I_928120	I	928120	value	0.280754002902866	3.98881749469276	0	NA	NA	NA
I_929167	I	929167	value	0.273167477593705	3.98881749469276	0	NA	NA	NA
I_935051	I	935051	value	0.649204115922122	3.98881749469276	0	NA	NA	NA
I_937541	I	937541	value	0.148973024001535	3.98881749469276	0	NA	NA	NA
I_944827	I	944827	value	0.143139550149826	3.98881749469276	0	NA	NA	NA
I_946698	I	946698	value	0.0994522641218147	3.98881749469276	0	NA	NA	NA
I_946888	I	946888	value	0.343368455785851	3.98881749469276	0	NA	NA	NA
I_948085	I	948085	value	0.456751941403019	3.98881749469276	0	NA	NA	NA
I_949518	I	949518	value	0.238443872339181	3.98881749469276	0	NA	NA	NA
I_951158	I	951158	value	0.839655091060778	3.98881749469276	0	NA	NA	NA
I_951205	I	951205	value	0.280754002902866	3.98881749469276	0	NA	NA	NA
I_952664	I	952664	value	0.304087689404955	3.98881749469276	0	NA	NA	NA
I_952797	I	952797	value	0.605444848369327	3.98881749469276	0	NA	NA	NA
I_956193	I	956193	value	0.048183978999355	3.98881749469276	0	NA	NA	NA
I_956257	I	956257	value	0.129633799117985	3.98881749469276	0	NA	NA	NA
I_956824	I	956824	value	0.155981065504822	3.98881749469276	0	NA	NA	NA
I_956834	I	956834	value	0.802920823473575	3.98881749469276	0	NA	NA	NA
I_957030	I	957030	value	0.0607392009685916	3.98881749469276	0	NA	NA	NA
I_958128	I	958128	value	0.248647243180638	3.98881749469276	0	NA	NA	NA
I_960040	I	960040	value	0.280754002902866	3.98881749469276	0	NA	NA	NA
I_960324	I	960324	value	0.22038838644446	3.98881749469276	0	NA	NA	NA
I_961171	I	961171	value	0.499196495438198	3.98881749469276	0	NA	NA	NA
I_961973	I	961973	value	0.411998290960487	3.98881749469276	0	NA	NA	NA
I_966004	I	966004	value	0.71604557313558	3.98881749469276	0	NA	NA	NA
I_966291	I	966291	value	0.218384751569325	3.98881749469276	0	NA	NA	NA
I_970841	I	970841	value	0.126523530884101	3.98881749469276	0	NA	NA	NA
I_973423	I	973423	value	0.275354384511045	3.98881749469276	0	NA	NA	NA
I_973931	I	973931	value	0.0994522641218147	3.98881749469276	0	NA	NA	NA
I_973948	I	973948	value	0.180859846688832	3.98881749469276	0	NA	NA	NA
I_975649	I	975649	value	0.583215346513601	3.98881749469276	0	NA	NA	NA
I_977210	I	977210	value	0.300872828953779	3.98881749469276	0	NA	NA	NA
I_977454	I	977454	value	0.185052492173043	3.98881749469276	0	NA	NA	NA
I_978053	I	978053	value	0.343368455785851	3.98881749469276	0	NA	NA	NA
I_981869	I	981869	value	0.740380738676119	3.98881749469276	0	NA	NA	NA
I_982362	I	982362	value	0.357251491091233	3.98881749469276	0	NA	NA	NA
I_982485	I	982485	value	0.399584879834227	3.98881749469276	0	NA	NA	NA
I_982488	I	982488	value	0.153025456205758	3.98881749469276	0	NA	NA	NA
I_982498	I	982498	value	0.0297642827018194	3.98881749469276	0	NA	NA	NA
I_986279	I	986279	value	0.525050675699086	3.98881749469276	0	NA	NA	NA
I_987047	I	987047	value	0.143139550149826	3.98881749469276	0	NA	NA	NA
I_989350	I	989350	value	0.424244554682401	3.98881749469276	0	NA	NA	NA
I_990478	I	990478	value	0.649204115922122	3.98881749469276	0	NA	NA	NA
I_992525	I	992525	value	0.455079383063371	3.98881749469276	0	NA	NA	NA
I_993213	I	993213	value	0.25308615693398	3.98881749469276	0	NA	NA	NA
I_997636	I	997636	value	0.528234669844368	3.98881749469276	0	NA	NA	NA
I_998099	I	998099	value	0.155981065504822	3.98881749469276	0	NA	NA	NA
I_999180	I	999180	value	0.499196495438198	3.98881749469276	0	NA	NA	NA
I_1001523	I	1001523	value	0.119668706620248	3.98881749469276	0	NA	NA	NA
I_1003648	I	1003648	value	0.25308615693398	3.98881749469276	0	NA	NA	NA
I_1009171	I	1009171	value	0.244860616476709	3.98881749469276	0	NA	NA	NA
I_1010811	I	1010811	value	0.155981065504822	3.98881749469276	0	NA	NA	NA
I_1011098	I	1011098	value	0.343368455785851	3.98881749469276	0	NA	NA	NA
I_1011805	I	1011805	value	0.304087689404955	3.98881749469276	0	NA	NA	NA
I_1012538	I	1012538	value	0.449104611664856	3.98881749469276	0	NA	NA	NA
I_1014347	I	1014347	value	0.0216545523665933	3.98881749469276	0	NA	NA	NA
I_1014571	I	1014571	value	0.332229321225833	3.98881749469276	0	NA	NA	NA
I_1015443	I	1015443	value	0.00781532858677405	3.98881749469276	0	NA	NA	NA
I_1019773	I	1019773	value	0.126793137011444	3.98881749469276	0	NA	NA	NA
I_1019781	I	1019781	value	0.0521372349784219	3.98881749469276	0	NA	NA	NA
I_1020536	I	1020536	value	0.305612490128732	3.98881749469276	0	NA	NA	NA
I_1022725	I	1022725	value	0.155981065504822	3.98881749469276	0	NA	NA	NA
I_1023256	I	1023256	value	0.25308615693398	3.98881749469276	0	NA	NA	NA
I_1024526	I	1024526	value	0.304087689404955	3.98881749469276	0	NA	NA	NA
I_1024571	I	1024571	value	0.839655091060778	3.98881749469276	0	NA	NA	NA
I_1024827	I	1024827	value	0.721646748925993	3.98881749469276	0	NA	NA	NA
I_1024985	I	1024985	value	0.071975865737629	3.98881749469276	0	NA	NA	NA
I_1025097	I	1025097	value	0.282571183050275	3.98881749469276	0	NA	NA	NA
I_1025375	I	1025375	value	0.340186841845996	3.98881749469276	0	NA	NA	NA
I_1026677	I	1026677	value	0.0520085893219144	3.98881749469276	0	NA	NA	NA
I_1028184	I	1028184	value	0.0587740744046941	3.98881749469276	0	NA	NA	NA
I_1028193	I	1028193	value	1.57069184475188	3.98881749469276	0	NA	NA	NA
I_1028383	I	1028383	value	0.031633026844526	3.98881749469276	0	NA	NA	NA
I_1028416	I	1028416	value	0.0550832309277335	3.98881749469276	0	NA	NA	NA
I_1028434	I	1028434	value	0.0793272069872603	3.98881749469276	0	NA	NA	NA
I_1028635	I	1028635	value	0.746552339304335	3.98881749469276	0	NA	NA	NA
I_1028717	I	1028717	value	0.465184032094065	3.98881749469276	0	NA	NA	NA
I_1028720	I	1028720	value	0.00243958969150573	3.98881749469276	0	NA	NA	NA
I_1028778	I	1028778	value	0.437094852677508	3.98881749469276	0	NA	NA	NA
I_1029276	I	1029276	value	0.465985321415473	3.98881749469276	0	NA	NA	NA
I_1029658	I	1029658	value	0.0730725567726856	3.98881749469276	0	NA	NA	NA
I_1030374	I	1030374	value	0.398559153252907	3.98881749469276	0	NA	NA	NA
I_1030566	I	1030566	value	0.185052492173043	3.98881749469276	0	NA	NA	NA
I_1031144	I	1031144	value	0.531878325700427	3.98881749469276	0	NA	NA	NA
I_1031678	I	1031678	value	0.340186841845996	3.98881749469276	0	NA	NA	NA
I_1031806	I	1031806	value	0.280754002902866	3.98881749469276	0	NA	NA	NA
I_1036208	I	1036208	value	0.5308371470713	3.98881749469276	0	NA	NA	NA
I_1037060	I	1037060	value	0.294897644728972	3.98881749469276	0	NA	NA	NA
I_1037062	I	1037062	value	0.0210730737411665	3.98881749469276	0	NA	NA	NA
I_1037458	I	1037458	value	0.0119613024536621	3.98881749469276	0	NA	NA	NA
I_1038023	I	1038023	value	0.277241962905606	3.98881749469276	0	NA	NA	NA
I_1038311	I	1038311	value	0.287990931228515	3.98881749469276	0	NA	NA	NA
I_1038911	I	1038911	value	0.0779461388522127	3.98881749469276	0	NA	NA	NA
I_1038993	I	1038993	value	0.617725307635167	3.98881749469276	0	NA	NA	NA
I_1039368	I	1039368	value	2.70843926045398	3.98881749469276	0	NA	NA	NA
I_1039929	I	1039929	value	0.368863861014796	3.98881749469276	0	NA	NA	NA
I_1040093	I	1040093	value	0.272383793654215	3.98881749469276	0	NA	NA	NA
I_1042029	I	1042029	value	2.07331701988868	3.98881749469276	0	NA	NA	NA
I_1042165	I	1042165	value	1.01989362356367	3.98881749469276	0	NA	NA	NA
I_1042170	I	1042170	value	0.289112434271051	3.98881749469276	0	NA	NA	NA
I_1042509	I	1042509	value	0.214836015502008	3.98881749469276	0	NA	NA	NA
I_1044180	I	1044180	value	0.738430803252517	3.98881749469276	0	NA	NA	NA
I_1044197	I	1044197	value	1.51962348744429	3.98881749469276	0	NA	NA	NA
I_1044379	I	1044379	value	1.33301845601163	3.98881749469276	0	NA	NA	NA
I_1044809	I	1044809	value	0.78237532018794	3.98881749469276	0	NA	NA	NA
I_1045575	I	1045575	value	1.02641560367037	3.98881749469276	0	NA	NA	NA
I_1046532	I	1046532	value	0.0119613024536621	3.98881749469276	0	NA	NA	NA
I_1047053	I	1047053	value	0.562199971958079	3.98881749469276	0	NA	NA	NA
I_1047146	I	1047146	value	0.655258401606827	3.98881749469276	0	NA	NA	NA
I_1047155	I	1047155	value	0.432967257248128	3.98881749469276	0	NA	NA	NA
I_1047397	I	1047397	value	0.192708507713234	3.98881749469276	0	NA	NA	NA
I_1047805	I	1047805	value	0.0945693757475479	3.98881749469276	0	NA	NA	NA
I_1048126	I	1048126	value	0.149777132528695	3.98881749469276	0	NA	NA	NA
I_1048187	I	1048187	value	0.633639567833451	3.98881749469276	0	NA	NA	NA
I_1048694	I	1048694	value	0.839655091060778	3.98881749469276	0	NA	NA	NA
I_1048779	I	1048779	value	0.292102306923075	3.98881749469276	0	NA	NA	NA
I_1049119	I	1049119	value	0.423013616170906	3.98881749469276	0	NA	NA	NA
I_1050213	I	1050213	value	0.190969719400302	3.98881749469276	0	NA	NA	NA
I_1052964	I	1052964	value	0.320575415464754	3.98881749469276	0	NA	NA	NA
I_1053201	I	1053201	value	0.39908393471132	3.98881749469276	0	NA	NA	NA
I_1054275	I	1054275	value	0.242220320127143	3.98881749469276	0	NA	NA	NA
I_1054596	I	1054596	value	0.334315734280037	3.98881749469276	0	NA	NA	NA
I_1054810	I	1054810	value	0.503940257382058	3.98881749469276	0	NA	NA	NA
I_1054987	I	1054987	value	1.71701526057991	3.98881749469276	0	NA	NA	NA
I_1055006	I	1055006	value	2.37084752236098	3.98881749469276	0	NA	NA	NA
I_1055167	I	1055167	value	1.38092855988175	3.98881749469276	0	NA	NA	NA
I_1056217	I	1056217	value	0.163663643685063	3.98881749469276	0	NA	NA	NA
I_1056226	I	1056226	value	0.147582929594548	3.98881749469276	0	NA	NA	NA
I_1056360	I	1056360	value	0.185955327476002	3.98881749469276	0	NA	NA	NA
I_1056644	I	1056644	value	0.427389906843493	3.98881749469276	0	NA	NA	NA
I_1056719	I	1056719	value	0.022341569743791	3.98881749469276	0	NA	NA	NA
I_1056770	I	1056770	value	0.402001160908482	3.98881749469276	0	NA	NA	NA
I_1057014	I	1057014	value	0.710450675930375	3.98881749469276	0	NA	NA	NA
I_1057175	I	1057175	value	0.821837909910308	3.98881749469276	0	NA	NA	NA
I_1057624	I	1057624	value	0.168679432726313	3.98881749469276	0	NA	NA	NA
I_1057650	I	1057650	value	0.788554504148876	3.98881749469276	0	NA	NA	NA
I_1059258	I	1059258	value	0.046090456568385	3.98881749469276	0	NA	NA	NA
I_1059600	I	1059600	value	0.0403387080407207	3.98881749469276	0	NA	NA	NA
I_1061572	I	1061572	value	0.625763117452155	3.98881749469276	0	NA	NA	NA
I_1062436	I	1062436	value	0.127397894339381	3.98881749469276	0	NA	NA	NA
I_1064642	I	1064642	value	0.0737399087839876	3.98881749469276	0	NA	NA	NA
I_1064922	I	1064922	value	0.47618987612607	3.98881749469276	0	NA	NA	NA
I_1065910	I	1065910	value	0.784406623279964	3.98881749469276	0	NA	NA	NA
I_1066368	I	1066368	value	0.618946582552874	3.98881749469276	0	NA	NA	NA
I_1067441	I	1067441	value	0.343368455785851	3.98881749469276	0	NA	NA	NA
I_1069226	I	1069226	value	0.115640820487113	3.98881749469276	0	NA	NA	NA
I_1071997	I	1071997	value	0.117323311781024	3.98881749469276	0	NA	NA	NA
I_1072123	I	1072123	value	0.231367133426333	3.98881749469276	0	NA	NA	NA
I_1073789	I	1073789	value	0.29280040300188	3.98881749469276	0	NA	NA	NA
I_1075092	I	1075092	value	0.540404453263145	3.98881749469276	0	NA	NA	NA
I_1075147	I	1075147	value	0.160593142000722	3.98881749469276	0	NA	NA	NA
I_1075470	I	1075470	value	0.0312833486875073	3.98881749469276	0	NA	NA	NA
I_1076579	I	1076579	value	0.12868561290086	3.98881749469276	0	NA	NA	NA
I_1080446	I	1080446	value	0.0351572743046676	3.98881749469276	0	NA	NA	NA
I_1082694	I	1082694	value	0.249525962706993	3.98881749469276	0	NA	NA	NA
I_1082771	I	1082771	value	0.148336588057653	3.98881749469276	0	NA	NA	NA
I_1083375	I	1083375	value	0.270108025280029	3.98881749469276	0	NA	NA	NA
I_1083856	I	1083856	value	0.767202257234269	3.98881749469276	0	NA	NA	NA
I_1084761	I	1084761	value	0.433493488306033	3.98881749469276	0	NA	NA	NA
I_1084762	I	1084762	value	0.0424140972376952	3.98881749469276	0	NA	NA	NA
I_1085272	I	1085272	value	0.115640820487113	3.98881749469276	0	NA	NA	NA
I_1086755	I	1086755	value	0.0374941045970627	3.98881749469276	0	NA	NA	NA
I_1086901	I	1086901	value	0.47426615923365	3.98881749469276	0	NA	NA	NA
I_1087624	I	1087624	value	0.0119613024536621	3.98881749469276	0	NA	NA	NA
I_1088775	I	1088775	value	0.550272938620143	3.98881749469276	0	NA	NA	NA
I_1090252	I	1090252	value	0.286901177454786	3.98881749469276	0	NA	NA	NA
I_1092270	I	1092270	value	0.0782947531292458	3.98881749469276	0	NA	NA	NA
I_1092478	I	1092478	value	0.359634564064817	3.98881749469276	0	NA	NA	NA
I_1092956	I	1092956	value	0.0392587239972661	3.98881749469276	0	NA	NA	NA
I_1093707	I	1093707	value	0.0719573658007341	3.98881749469276	0	NA	NA	NA
I_1094888	I	1094888	value	0.131009282980344	3.98881749469276	0	NA	NA	NA
I_1095535	I	1095535	value	0.0268031817435347	3.98881749469276	0	NA	NA	NA
I_1097132	I	1097132	value	0.127397894339381	3.98881749469276	0	NA	NA	NA
I_1099042	I	1099042	value	0.354926633783915	3.98881749469276	0	NA	NA	NA
I_1099714	I	1099714	value	0.247905361045191	3.98881749469276	0	NA	NA	NA
I_1101927	I	1101927	value	0.14668948225479	3.98881749469276	0	NA	NA	NA
I_1102994	I	1102994	value	0.204784829951905	3.98881749469276	0	NA	NA	NA
I_1104929	I	1104929	value	0.209897714232442	3.98881749469276	0	NA	NA	NA
I_1105877	I	1105877	value	0.267581042436765	3.98881749469276	0	NA	NA	NA
I_1106421	I	1106421	value	0.0324205439602955	3.98881749469276	0	NA	NA	NA
I_1106869	I	1106869	value	0.330302559329013	3.98881749469276	0	NA	NA	NA
I_1108168	I	1108168	value	0.0136118931335464	3.98881749469276	0	NA	NA	NA
I_1108670	I	1108670	value	0.0312833486875073	3.98881749469276	0	NA	NA	NA
I_1113447	I	1113447	value	0.000674893057117979	3.98881749469276	0	NA	NA	NA
I_1115763	I	1115763	value	0.116442554755641	3.98881749469276	0	NA	NA	NA
I_1116323	I	1116323	value	0.0136118931335464	3.98881749469276	0	NA	NA	NA
I_1116917	I	1116917	value	0.361651358760228	3.98881749469276	0	NA	NA	NA
I_1119714	I	1119714	value	0.115698236775196	3.98881749469276	0	NA	NA	NA
I_1124417	I	1124417	value	0.110434198762054	3.98881749469276	0	NA	NA	NA
I_1124439	I	1124439	value	0.128718104839103	3.98881749469276	0	NA	NA	NA
I_1124453	I	1124453	value	0.0404541927711921	3.98881749469276	0	NA	NA	NA
I_1124509	I	1124509	value	0.0998685871508765	3.98881749469276	0	NA	NA	NA
I_1124582	I	1124582	value	0.109826946042551	3.98881749469276	0	NA	NA	NA
I_1124996	I	1124996	value	0.222059236117336	3.98881749469276	0	NA	NA	NA
I_1125800	I	1125800	value	0.168618427073749	3.98881749469276	0	NA	NA	NA
I_1126557	I	1126557	value	0.342058810649276	3.98881749469276	0	NA	NA	NA
I_1128541	I	1128541	value	0.247905361045191	3.98881749469276	0	NA	NA	NA
I_1128588	I	1128588	value	0.642675522575214	3.98881749469276	0	NA	NA	NA
I_1128647	I	1128647	value	0.433417806921112	3.98881749469276	0	NA	NA	NA
I_1128934	I	1128934	value	0.213141205718209	3.98881749469276	0	NA	NA	NA
I_1129062	I	1129062	value	0.330302559329013	3.98881749469276	0	NA	NA	NA
I_1129124	I	1129124	value	0.127397894339381	3.98881749469276	0	NA	NA	NA
I_1129484	I	1129484	value	0.222532476780448	3.98881749469276	0	NA	NA	NA
I_1132440	I	1132440	value	0.052557725940768	3.98881749469276	0	NA	NA	NA
I_1132495	I	1132495	value	0.222059236117336	3.98881749469276	0	NA	NA	NA
I_1135670	I	1135670	value	0.0264962622149552	3.98881749469276	0	NA	NA	NA
I_1136113	I	1136113	value	0.900582206563064	3.98881749469276	0	NA	NA	NA
I_1136364	I	1136364	value	0.578657255793279	3.98881749469276	0	NA	NA	NA
I_1137068	I	1137068	value	0.352929217653206	3.98881749469276	0	NA	NA	NA
I_1137255	I	1137255	value	0.0878563926094451	3.98881749469276	0	NA	NA	NA
I_1137522	I	1137522	value	0.15167410442217	3.98881749469276	0	NA	NA	NA
I_1137920	I	1137920	value	0.433417806921112	3.98881749469276	0	NA	NA	NA
I_1138018	I	1138018	value	0.00131597690287495	3.98881749469276	0	NA	NA	NA
I_1138656	I	1138656	value	0.314776318356452	3.98881749469276	0	NA	NA	NA
I_1138662	I	1138662	value	0.305012095088619	3.98881749469276	0	NA	NA	NA
I_1138753	I	1138753	value	0.466824701152353	3.98881749469276	0	NA	NA	NA
I_1138876	I	1138876	value	0.0330851114807561	3.98881749469276	0	NA	NA	NA
I_1139159	I	1139159	value	0.178359757523951	3.98881749469276	0	NA	NA	NA
I_1139198	I	1139198	value	0.0595541648643396	3.98881749469276	0	NA	NA	NA
I_1139424	I	1139424	value	0.127397894339381	3.98881749469276	0	NA	NA	NA
I_1139561	I	1139561	value	0.433289306499027	3.98881749469276	0	NA	NA	NA
I_1139589	I	1139589	value	0.038971060415519	3.98881749469276	0	NA	NA	NA
I_1139702	I	1139702	value	0.26014334020286	3.98881749469276	0	NA	NA	NA
I_1140126	I	1140126	value	0.330302559329013	3.98881749469276	0	NA	NA	NA
I_1140712	I	1140712	value	0.342058810649276	3.98881749469276	0	NA	NA	NA
I_1140724	I	1140724	value	0.148324853100888	3.98881749469276	0	NA	NA	NA
I_1140819	I	1140819	value	0.14459586019609	3.98881749469276	0	NA	NA	NA
I_1141861	I	1141861	value	0.453105240342437	3.98881749469276	0	NA	NA	NA
I_1142615	I	1142615	value	0.122783298548645	3.98881749469276	0	NA	NA	NA
I_1144436	I	1144436	value	0.106322363390819	3.98881749469276	0	NA	NA	NA
I_1145060	I	1145060	value	0.0324579378991354	3.98881749469276	0	NA	NA	NA
I_1145927	I	1145927	value	0.023429217590661	3.98881749469276	0	NA	NA	NA
I_1145937	I	1145937	value	0.145181640756914	3.98881749469276	0	NA	NA	NA
I_1146228	I	1146228	value	0.0203780837727189	3.98881749469276	0	NA	NA	NA
I_1146323	I	1146323	value	0.0557381712597065	3.98881749469276	0	NA	NA	NA
I_1146343	I	1146343	value	0.139403110124414	3.98881749469276	0	NA	NA	NA
I_1146481	I	1146481	value	0.0562643910054959	3.98881749469276	0	NA	NA	NA
I_1146782	I	1146782	value	0.127397894339381	3.98881749469276	0	NA	NA	NA
I_1148455	I	1148455	value	0.0395957939330918	3.98881749469276	0	NA	NA	NA
I_1148975	I	1148975	value	0.25851807302596	3.98881749469276	0	NA	NA	NA
I_1149069	I	1149069	value	0.0261595783806203	3.98881749469276	0	NA	NA	NA
I_1149571	I	1149571	value	0.0191406441599349	3.98881749469276	0	NA	NA	NA
I_1150039	I	1150039	value	0.115179464384792	3.98881749469276	0	NA	NA	NA
I_1152418	I	1152418	value	0.0627104818279397	3.98881749469276	0	NA	NA	NA
I_1152895	I	1152895	value	0.341609476255669	3.98881749469276	0	NA	NA	NA
I_1154417	I	1154417	value	0.197372926966091	3.98881749469276	0	NA	NA	NA
I_1154890	I	1154890	value	0.038971060415519	3.98881749469276	0	NA	NA	NA
I_1156292	I	1156292	value	0.300978556119527	3.98881749469276	0	NA	NA	NA
I_1156492	I	1156492	value	0.115179464384792	3.98881749469276	0	NA	NA	NA
I_1157239	I	1157239	value	0.137242067903719	3.98881749469276	0	NA	NA	NA
I_1161979	I	1161979	value	0.342058810649276	3.98881749469276	0	NA	NA	NA
I_1163657	I	1163657	value	0.0312833486875073	3.98881749469276	0	NA	NA	NA
I_1163983	I	1163983	value	0.176762345459182	3.98881749469276	0	NA	NA	NA
I_1164147	I	1164147	value	0.194155126693588	3.98881749469276	0	NA	NA	NA
I_1165063	I	1165063	value	0.213090376256175	3.98881749469276	0	NA	NA	NA
I_1165788	I	1165788	value	0.294274746153402	3.98881749469276	0	NA	NA	NA
I_1166692	I	1166692	value	0.0749473551309767	3.98881749469276	0	NA	NA	NA
I_1169983	I	1169983	value	0.0372200639037376	3.98881749469276	0	NA	NA	NA
I_1170200	I	1170200	value	0.228725586139106	3.98881749469276	0	NA	NA	NA
I_1170252	I	1170252	value	0.0170400292307204	3.98881749469276	0	NA	NA	NA
I_1171021	I	1171021	value	0.396089927661374	3.98881749469276	0	NA	NA	NA
I_1172912	I	1172912	value	0.0949569436220913	3.98881749469276	0	NA	NA	NA
I_1172961	I	1172961	value	0.515098480955806	3.98881749469276	0	NA	NA	NA
I_1173625	I	1173625	value	0.227650063036218	3.98881749469276	0	NA	NA	NA
I_1174768	I	1174768	value	0.0681630409121258	3.98881749469276	0	NA	NA	NA
I_1175040	I	1175040	value	0.511217383895009	3.98881749469276	0	NA	NA	NA
I_1175925	I	1175925	value	0.415887078960876	3.98881749469276	0	NA	NA	NA
I_1177574	I	1177574	value	0.296399765388956	3.98881749469276	0	NA	NA	NA
I_1177732	I	1177732	value	0.809695512582142	3.98881749469276	0	NA	NA	NA
I_1178968	I	1178968	value	0.0868225684793393	3.98881749469276	0	NA	NA	NA
I_1180061	I	1180061	value	0.269015331671437	3.98881749469276	0	NA	NA	NA
I_1180172	I	1180172	value	1.71222018570841	3.98881749469276	0	NA	NA	NA
I_1183342	I	1183342	value	0.414921102648498	3.98881749469276	0	NA	NA	NA
I_1183504	I	1183504	value	0.177760796127627	3.98881749469276	0	NA	NA	NA
I_1185263	I	1185263	value	0.309862044723066	3.98881749469276	0	NA	NA	NA
I_1185640	I	1185640	value	0.038971060415519	3.98881749469276	0	NA	NA	NA
I_1185865	I	1185865	value	0.0258393234351956	3.98881749469276	0	NA	NA	NA
I_1186415	I	1186415	value	0.401858138630865	3.98881749469276	0	NA	NA	NA
I_1187017	I	1187017	value	0.622232043438327	3.98881749469276	0	NA	NA	NA
I_1187177	I	1187177	value	0.516291994126248	3.98881749469276	0	NA	NA	NA
I_1187714	I	1187714	value	0.131688151892909	3.98881749469276	0	NA	NA	NA
I_1187812	I	1187812	value	0.111195937355015	3.98881749469276	0	NA	NA	NA
I_1188076	I	1188076	value	0.127397894339381	3.98881749469276	0	NA	NA	NA
I_1188539	I	1188539	value	0.230598909507319	3.98881749469276	0	NA	NA	NA
I_1188668	I	1188668	value	0.218693186023031	3.98881749469276	0	NA	NA	NA
I_1188837	I	1188837	value	0.24020206269056	3.98881749469276	0	NA	NA	NA
I_1189620	I	1189620	value	0.0729413071109373	3.98881749469276	0	NA	NA	NA
I_1189968	I	1189968	value	0.0107060624456965	3.98881749469276	0	NA	NA	NA
I_1191076	I	1191076	value	0.0120747161212362	3.98881749469276	0	NA	NA	NA
I_1191796	I	1191796	value	0.164177458873592	3.98881749469276	0	NA	NA	NA
I_1193009	I	1193009	value	1.13794017521221	3.98881749469276	0	NA	NA	NA
I_1194404	I	1194404	value	0.301887706410847	3.98881749469276	0	NA	NA	NA
I_1196470	I	1196470	value	0.941865221308841	3.98881749469276	0	NA	NA	NA
I_1196471	I	1196471	value	0.967642094584144	3.98881749469276	0	NA	NA	NA
I_1196729	I	1196729	value	0.567766583918892	3.98881749469276	0	NA	NA	NA
I_1197600	I	1197600	value	0.491354179149401	3.98881749469276	0	NA	NA	NA
I_1199049	I	1199049	value	0.0721075314514407	3.98881749469276	0	NA	NA	NA
I_1199489	I	1199489	value	0.178448759850685	3.98881749469276	0	NA	NA	NA
I_1201059	I	1201059	value	0.00733584487076451	3.98881749469276	0	NA	NA	NA
I_1201586	I	1201586	value	0.0753313165676996	3.98881749469276	0	NA	NA	NA
I_1202320	I	1202320	value	0.727639882659415	3.98881749469276	0	NA	NA	NA
I_1202401	I	1202401	value	0.0258393234351956	3.98881749469276	0	NA	NA	NA
I_1202448	I	1202448	value	0.0750531397214872	3.98881749469276	0	NA	NA	NA
I_1202848	I	1202848	value	0.294418824345308	3.98881749469276	0	NA	NA	NA
I_1202880	I	1202880	value	0.095709420410229	3.98881749469276	0	NA	NA	NA
I_1205037	I	1205037	value	0.209160725467887	3.98881749469276	0	NA	NA	NA
I_1208140	I	1208140	value	0.165207925836341	3.98881749469276	0	NA	NA	NA
I_1208168	I	1208168	value	0.127397894339381	3.98881749469276	0	NA	NA	NA
I_1208327	I	1208327	value	0.0511413331413908	3.98881749469276	0	NA	NA	NA
I_1208843	I	1208843	value	0.119352081228303	3.98881749469276	0	NA	NA	NA
I_1211276	I	1211276	value	0.00740450348106171	3.98881749469276	0	NA	NA	NA
I_1211383	I	1211383	value	0.0914371128064791	3.98881749469276	0	NA	NA	NA
I_1212452	I	1212452	value	0.0675942564207138	3.98881749469276	0	NA	NA	NA
I_1221128	I	1221128	value	0.044707065695545	3.98881749469276	0	NA	NA	NA
I_1221644	I	1221644	value	0.0136278308874338	3.98881749469276	0	NA	NA	NA
I_1223347	I	1223347	value	0.145708081673714	3.98881749469276	0	NA	NA	NA
I_1227294	I	1227294	value	0.117349742855969	3.98881749469276	0	NA	NA	NA
I_1228585	I	1228585	value	0.0258393234351956	3.98881749469276	0	NA	NA	NA
I_1229353	I	1229353	value	2.84602392997735	3.98881749469276	0	NA	NA	NA
I_1231461	I	1231461	value	0.168618427073749	3.98881749469276	0	NA	NA	NA
I_1233659	I	1233659	value	0.00208469702706486	3.98881749469276	0	NA	NA	NA
I_1235904	I	1235904	value	0.0755978284579706	3.98881749469276	0	NA	NA	NA
I_1238944	I	1238944	value	0.0595644525765453	3.98881749469276	0	NA	NA	NA
I_1239793	I	1239793	value	0.0750531397214872	3.98881749469276	0	NA	NA	NA
I_1240343	I	1240343	value	0.207874987226342	3.98881749469276	0	NA	NA	NA
I_1240963	I	1240963	value	0.117470852816426	3.98881749469276	0	NA	NA	NA
I_1241571	I	1241571	value	0.771997736216058	3.98881749469276	0	NA	NA	NA
I_1241781	I	1241781	value	0.0633492610111383	3.98881749469276	0	NA	NA	NA
I_1241804	I	1241804	value	0.127397894339381	3.98881749469276	0	NA	NA	NA
I_1244062	I	1244062	value	0.0824040143771873	3.98881749469276	0	NA	NA	NA
I_1244526	I	1244526	value	0.183736797628937	3.98881749469276	0	NA	NA	NA
I_1244658	I	1244658	value	0.0259258239939066	3.98881749469276	0	NA	NA	NA
I_1244906	I	1244906	value	0.124590852985733	3.98881749469276	0	NA	NA	NA
I_1245508	I	1245508	value	0.0307297630674052	3.98881749469276	0	NA	NA	NA
I_1245537	I	1245537	value	0.092698451221691	3.98881749469276	0	NA	NA	NA
I_1246239	I	1246239	value	0.0487680264191441	3.98881749469276	0	NA	NA	NA
I_1246817	I	1246817	value	0.0426893732674367	3.98881749469276	0	NA	NA	NA
I_1248249	I	1248249	value	0.0750531397214872	3.98881749469276	0	NA	NA	NA
I_1248432	I	1248432	value	0.22559963268036	3.98881749469276	0	NA	NA	NA
I_1248465	I	1248465	value	0.0668040426632147	3.98881749469276	0	NA	NA	NA
I_1249280	I	1249280	value	0.0120786511174634	3.98881749469276	0	NA	NA	NA
I_1249415	I	1249415	value	0.275806345405146	3.98881749469276	0	NA	NA	NA
I_1250419	I	1250419	value	0.148992608849313	3.98881749469276	0	NA	NA	NA
I_1252221	I	1252221	value	0.0904250544256461	3.98881749469276	0	NA	NA	NA
I_1252382	I	1252382	value	0.236525573380216	3.98881749469276	0	NA	NA	NA
I_1253769	I	1253769	value	0.118469326651742	3.98881749469276	0	NA	NA	NA
I_1253840	I	1253840	value	0.137138525527464	3.98881749469276	0	NA	NA	NA
I_1253971	I	1253971	value	0.0177826631921753	3.98881749469276	0	NA	NA	NA
I_1255376	I	1255376	value	0.0922735013281847	3.98881749469276	0	NA	NA	NA
I_1256484	I	1256484	value	0.0335740741417423	3.98881749469276	0	NA	NA	NA
I_1258563	I	1258563	value	0.359321846933058	3.98881749469276	0	NA	NA	NA
I_1258706	I	1258706	value	0.272060908873222	3.98881749469276	0	NA	NA	NA
I_1259971	I	1259971	value	0.127745712207987	3.98881749469276	0	NA	NA	NA
I_1260822	I	1260822	value	0.0750531397214872	3.98881749469276	0	NA	NA	NA
I_1261955	I	1261955	value	0.183736797628937	3.98881749469276	0	NA	NA	NA
I_1265818	I	1265818	value	0.0444680996663083	3.98881749469276	0	NA	NA	NA
I_1269893	I	1269893	value	0.0473294469909417	3.98881749469276	0	NA	NA	NA
I_1273893	I	1273893	value	0.0898644884018897	3.98881749469276	0	NA	NA	NA
I_1274399	I	1274399	value	0.127745712207987	3.98881749469276	0	NA	NA	NA
I_1281806	I	1281806	value	0.0382266780969129	3.98881749469276	0	NA	NA	NA
I_1287916	I	1287916	value	0.0473294469909417	3.98881749469276	0	NA	NA	NA
I_1292053	I	1292053	value	0.101322130256919	3.98881749469276	0	NA	NA	NA
I_1292211	I	1292211	value	0.39141745924478	3.98881749469276	0	NA	NA	NA
I_1292489	I	1292489	value	0.212972792479263	3.98881749469276	0	NA	NA	NA
I_1294288	I	1294288	value	0.150141333302795	3.98881749469276	0	NA	NA	NA
I_1294610	I	1294610	value	0.169777422479937	3.98881749469276	0	NA	NA	NA
I_1297336	I	1297336	value	0.126963577497862	3.98881749469276	0	NA	NA	NA
I_1302564	I	1302564	value	0.0659691507406362	3.98881749469276	0	NA	NA	NA
I_1305853	I	1305853	value	0.0444680996663083	3.98881749469276	0	NA	NA	NA
I_1306082	I	1306082	value	0.00626741489663806	3.98881749469276	0	NA	NA	NA
I_1311054	I	1311054	value	0.0369851118569823	3.98881749469276	0	NA	NA	NA
I_1312414	I	1312414	value	0.0750531397214872	3.98881749469276	0	NA	NA	NA
I_1312794	I	1312794	value	0.0658337383648949	3.98881749469276	0	NA	NA	NA
I_1314414	I	1314414	value	0.0486001440011203	3.98881749469276	0	NA	NA	NA
I_1317482	I	1317482	value	0.0294837475074576	3.98881749469276	0	NA	NA	NA
I_1317511	I	1317511	value	0.14078987433145	3.98881749469276	0	NA	NA	NA
I_1317527	I	1317527	value	0.27590655286252	3.98881749469276	0	NA	NA	NA
I_1332141	I	1332141	value	0.433991614720687	3.98881749469276	0	NA	NA	NA
I_1332987	I	1332987	value	0.0658337383648949	3.98881749469276	0	NA	NA	NA
I_1333076	I	1333076	value	0.0490088181600538	3.98881749469276	0	NA	NA	NA
I_1334363	I	1334363	value	0.0356711003739545	3.98881749469276	0	NA	NA	NA
I_1335150	I	1335150	value	0.0917593383736426	3.98881749469276	0	NA	NA	NA
I_1335208	I	1335208	value	0.10756672990179	3.98881749469276	0	NA	NA	NA
I_1338003	I	1338003	value	0.0750531397214872	3.98881749469276	0	NA	NA	NA
I_1339689	I	1339689	value	0.00314702230705307	3.98881749469276	0	NA	NA	NA
I_1343828	I	1343828	value	0.126963577497862	3.98881749469276	0	NA	NA	NA
I_1347323	I	1347323	value	0.0439650226004857	3.98881749469276	0	NA	NA	NA
I_1348358	I	1348358	value	0.414086062204161	3.98881749469276	0	NA	NA	NA
I_1350704	I	1350704	value	0.0901799335438838	3.98881749469276	0	NA	NA	NA
I_1351535	I	1351535	value	0.0402027366884759	3.98881749469276	0	NA	NA	NA
I_1351929	I	1351929	value	0.0750531397214872	3.98881749469276	0	NA	NA	NA
I_1353847	I	1353847	value	0.0774840451559099	3.98881749469276	0	NA	NA	NA
I_1354147	I	1354147	value	0.200332845404456	3.98881749469276	0	NA	NA	NA
I_1354337	I	1354337	value	0.103240535830359	3.98881749469276	0	NA	NA	NA
I_1354964	I	1354964	value	0.0126977802250378	3.98881749469276	0	NA	NA	NA
I_1355859	I	1355859	value	0.343330327581619	3.98881749469276	0	NA	NA	NA
I_1358751	I	1358751	value	0.221527581287897	3.98881749469276	0	NA	NA	NA
I_1360871	I	1360871	value	0.0435271676350152	3.98881749469276	0	NA	NA	NA
I_1364790	I	1364790	value	0.0693189804847299	3.98881749469276	0	NA	NA	NA
I_1365086	I	1365086	value	0.120461473917427	3.98881749469276	0	NA	NA	NA
I_1365102	I	1365102	value	0.0490088181600538	3.98881749469276	0	NA	NA	NA
I_1365778	I	1365778	value	0.155537017811961	3.98881749469276	0	NA	NA	NA
I_1367921	I	1367921	value	0.00435157683833165	3.98881749469276	0	NA	NA	NA
I_1368716	I	1368716	value	0.192807122974066	3.98881749469276	0	NA	NA	NA
I_1368717	I	1368717	value	0.0374147673153365	3.98881749469276	0	NA	NA	NA
I_1376787	I	1376787	value	0.222800386814199	3.98881749469276	0	NA	NA	NA
I_1376939	I	1376939	value	0.3783133480029	3.98881749469276	0	NA	NA	NA
I_1377942	I	1377942	value	0.195786133640562	3.98881749469276	0	NA	NA	NA
I_1379088	I	1379088	value	0.231834570049313	3.98881749469276	0	NA	NA	NA
I_1379783	I	1379783	value	0.00597459938682112	3.98881749469276	0	NA	NA	NA
I_1379790	I	1379790	value	0.0160349209198938	3.98881749469276	0	NA	NA	NA
I_1380943	I	1380943	value	0.232890674875557	3.98881749469276	0	NA	NA	NA
I_1381551	I	1381551	value	0.0132868543320047	3.98881749469276	0	NA	NA	NA
I_1383336	I	1383336	value	0.313987431768894	3.98881749469276	0	NA	NA	NA
I_1384389	I	1384389	value	0.0432669782847551	3.98881749469276	0	NA	NA	NA
I_1384407	I	1384407	value	0.195786133640562	3.98881749469276	0	NA	NA	NA
I_1385238	I	1385238	value	0.918378535345919	3.98881749469276	0	NA	NA	NA
I_1385611	I	1385611	value	0.0759627372773014	3.98881749469276	0	NA	NA	NA
I_1387299	I	1387299	value	0.0183369914208105	3.98881749469276	0	NA	NA	NA
I_1387804	I	1387804	value	0.101218724787087	3.98881749469276	0	NA	NA	NA
I_1388149	I	1388149	value	0.0869817045399293	3.98881749469276	0	NA	NA	NA
I_1390465	I	1390465	value	0.10403707530385	3.98881749469276	0	NA	NA	NA
I_1390475	I	1390475	value	0.547706496813686	3.98881749469276	0	NA	NA	NA
I_1390943	I	1390943	value	0.00944530330564063	3.98881749469276	0	NA	NA	NA
I_1391475	I	1391475	value	0.50272500570508	3.98881749469276	0	NA	NA	NA
I_1392049	I	1392049	value	0.0928726721319665	3.98881749469276	0	NA	NA	NA
I_1393667	I	1393667	value	0.00744057884288334	3.98881749469276	0	NA	NA	NA
I_1394221	I	1394221	value	0.304150395701317	3.98881749469276	0	NA	NA	NA
I_1394700	I	1394700	value	0.0144521534515125	3.98881749469276	0	NA	NA	NA
I_1394746	I	1394746	value	0.0317551103999531	3.98881749469276	0	NA	NA	NA
I_1395219	I	1395219	value	1.28578837008237	3.98881749469276	0	NA	NA	NA
I_1397965	I	1397965	value	1.41152978878358	3.98881749469276	0	NA	NA	NA
I_1397995	I	1397995	value	0.0241248986220981	3.98881749469276	0	NA	NA	NA
I_1399531	I	1399531	value	0.412503053734285	3.98881749469276	0	NA	NA	NA
I_1400428	I	1400428	value	0.179240843188707	3.98881749469276	0	NA	NA	NA
I_1404717	I	1404717	value	0.309734112657484	3.98881749469276	0	NA	NA	NA
I_1404829	I	1404829	value	0.212861568131056	3.98881749469276	0	NA	NA	NA
I_1405025	I	1405025	value	0.0144521534515125	3.98881749469276	0	NA	NA	NA
I_1407455	I	1407455	value	0.0968521964236305	3.98881749469276	0	NA	NA	NA
I_1407701	I	1407701	value	0.0317551103999531	3.98881749469276	0	NA	NA	NA
I_1409600	I	1409600	value	0.0356711003739545	3.98881749469276	0	NA	NA	NA
I_1410169	I	1410169	value	0.343358026586701	3.98881749469276	0	NA	NA	NA
I_1410207	I	1410207	value	0.229874297370187	3.98881749469276	0	NA	NA	NA
I_1411143	I	1411143	value	0.0344078992267607	3.98881749469276	0	NA	NA	NA
I_1411795	I	1411795	value	0.42896424876815	3.98881749469276	0	NA	NA	NA
I_1414440	I	1414440	value	0.142145328590545	3.98881749469276	0	NA	NA	NA
I_1415438	I	1415438	value	0.149822504032989	3.98881749469276	0	NA	NA	NA
I_1416193	I	1416193	value	0.115677972351778	3.98881749469276	0	NA	NA	NA
I_1417682	I	1417682	value	0.0490088181600538	3.98881749469276	0	NA	NA	NA
I_1418565	I	1418565	value	0.263299302409514	3.98881749469276	0	NA	NA	NA
I_1418704	I	1418704	value	0.00903837216100015	3.98881749469276	0	NA	NA	NA
I_1422283	I	1422283	value	0.0741301116975348	3.98881749469276	0	NA	NA	NA
I_1422419	I	1422419	value	0.177788001574109	3.98881749469276	0	NA	NA	NA
I_1422995	I	1422995	value	0.352330396395357	3.98881749469276	0	NA	NA	NA
I_1425092	I	1425092	value	0.309734112657484	3.98881749469276	0	NA	NA	NA
I_1427715	I	1427715	value	0.153014059385927	3.98881749469276	0	NA	NA	NA
I_1428392	I	1428392	value	0.0490088181600538	3.98881749469276	0	NA	NA	NA
I_1432003	I	1432003	value	0.133012538101035	3.98881749469276	0	NA	NA	NA
I_1433303	I	1433303	value	0.208738558039051	3.98881749469276	0	NA	NA	NA
I_1436244	I	1436244	value	0.309734112657484	3.98881749469276	0	NA	NA	NA
I_1436569	I	1436569	value	0.111503178367445	3.98881749469276	0	NA	NA	NA
I_1436644	I	1436644	value	0.117485192804228	3.98881749469276	0	NA	NA	NA
I_1436712	I	1436712	value	0.393268511314788	3.98881749469276	0	NA	NA	NA
I_1437140	I	1437140	value	0.0813916744907861	3.98881749469276	0	NA	NA	NA
I_1437250	I	1437250	value	0.396373063740472	3.98881749469276	0	NA	NA	NA
I_1437302	I	1437302	value	0.879372612644254	3.98881749469276	0	NA	NA	NA
I_1437334	I	1437334	value	0.331838313366484	3.98881749469276	0	NA	NA	NA
I_1438047	I	1438047	value	0.240369139831123	3.98881749469276	0	NA	NA	NA
I_1439691	I	1439691	value	0.149414860647575	3.98881749469276	0	NA	NA	NA
I_1439789	I	1439789	value	0.139230414402951	3.98881749469276	0	NA	NA	NA
I_1441242	I	1441242	value	0.0730542861195521	3.98881749469276	0	NA	NA	NA
I_1441620	I	1441620	value	0.185090274896767	3.98881749469276	0	NA	NA	NA
I_1441701	I	1441701	value	0.279653388597154	3.98881749469276	0	NA	NA	NA
I_1442280	I	1442280	value	0.00944530330564063	3.98881749469276	0	NA	NA	NA
I_1442819	I	1442819	value	0.266904501460612	3.98881749469276	0	NA	NA	NA
I_1443534	I	1443534	value	0.0799691778174644	3.98881749469276	0	NA	NA	NA
I_1444096	I	1444096	value	0.309734112657484	3.98881749469276	0	NA	NA	NA
I_1448655	I	1448655	value	0.220883536023162	3.98881749469276	0	NA	NA	NA
I_1453605	I	1453605	value	0.263299302409514	3.98881749469276	0	NA	NA	NA
I_1453631	I	1453631	value	0.0739196572065122	3.98881749469276	0	NA	NA	NA
I_1455528	I	1455528	value	0.112386180789456	3.98881749469276	0	NA	NA	NA
I_1457007	I	1457007	value	0.0490088181600538	3.98881749469276	0	NA	NA	NA
I_1457264	I	1457264	value	0.277338152197008	3.98881749469276	0	NA	NA	NA
I_1458116	I	1458116	value	0.0435190060234448	3.98881749469276	0	NA	NA	NA
I_1459547	I	1459547	value	0.36332317215766	3.98881749469276	0	NA	NA	NA
I_1460652	I	1460652	value	0.309734112657484	3.98881749469276	0	NA	NA	NA
I_1465919	I	1465919	value	0.185520840131176	3.98881749469276	0	NA	NA	NA
I_1468649	I	1468649	value	0.124695286682284	3.98881749469276	0	NA	NA	NA
I_1469329	I	1469329	value	0.149541832419452	3.98881749469276	0	NA	NA	NA
I_1469554	I	1469554	value	0.0242247186725712	3.98881749469276	0	NA	NA	NA
I_1469955	I	1469955	value	0.161997194519987	3.98881749469276	0	NA	NA	NA
I_1470147	I	1470147	value	0.128997392459026	3.98881749469276	0	NA	NA	NA
I_1471539	I	1471539	value	0.0663956390494049	3.98881749469276	0	NA	NA	NA
I_1472091	I	1472091	value	0.267689490001201	3.98881749469276	0	NA	NA	NA
I_1478424	I	1478424	value	0.128997392459026	3.98881749469276	0	NA	NA	NA
I_1480003	I	1480003	value	0.186984688169674	3.98881749469276	0	NA	NA	NA
I_1480544	I	1480544	value	0.143225136842699	3.98881749469276	0	NA	NA	NA
I_1482176	I	1482176	value	0.0490088181600538	3.98881749469276	0	NA	NA	NA
I_1482235	I	1482235	value	0.304457876942796	3.98881749469276	0	NA	NA	NA
I_1483568	I	1483568	value	0.0158250546726199	3.98881749469276	0	NA	NA	NA
I_1489001	I	1489001	value	0.309734112657484	3.98881749469276	0	NA	NA	NA
I_1491130	I	1491130	value	0.135320360895722	3.98881749469276	0	NA	NA	NA
I_1491632	I	1491632	value	0.117294815336191	3.98881749469276	0	NA	NA	NA
I_1494094	I	1494094	value	0.145148309658852	3.98881749469276	0	NA	NA	NA
I_1494923	I	1494923	value	0.000502906448231846	3.98881749469276	0	NA	NA	NA
I_1494924	I	1494924	value	0.0501579582574957	3.98881749469276	0	NA	NA	NA
I_1495519	I	1495519	value	0.0620456545538262	3.98881749469276	0	NA	NA	NA
I_1496403	I	1496403	value	0.156182971856348	3.98881749469276	0	NA	NA	NA
I_1496451	I	1496451	value	0.327793178331889	3.98881749469276	0	NA	NA	NA
I_1496666	I	1496666	value	0.00203814003097411	3.98881749469276	0	NA	NA	NA
I_1496824	I	1496824	value	0.171825485672009	3.98881749469276	0	NA	NA	NA
I_1497190	I	1497190	value	0.509559788759116	3.98881749469276	0	NA	NA	NA
I_1497274	I	1497274	value	0.208196216035516	3.98881749469276	0	NA	NA	NA
I_1497593	I	1497593	value	0.0490088181600538	3.98881749469276	0	NA	NA	NA
I_1499750	I	1499750	value	0.093788849545285	3.98881749469276	0	NA	NA	NA
I_1499924	I	1499924	value	0.027393368290568	3.98881749469276	0	NA	NA	NA
I_1500578	I	1500578	value	0.094074155010786	3.98881749469276	0	NA	NA	NA
I_1501503	I	1501503	value	0.0115203258483055	3.98881749469276	0	NA	NA	NA
I_1502481	I	1502481	value	0.074932740398119	3.98881749469276	0	NA	NA	NA
I_1503260	I	1503260	value	0.00506333733237365	3.98881749469276	0	NA	NA	NA
I_1503997	I	1503997	value	0.223029514544723	3.98881749469276	0	NA	NA	NA
I_1504082	I	1504082	value	0.326139778924792	3.98881749469276	0	NA	NA	NA
I_1504084	I	1504084	value	0.0722109462999034	3.98881749469276	0	NA	NA	NA
I_1506044	I	1506044	value	0.0476088426598128	3.98881749469276	0	NA	NA	NA
I_1506133	I	1506133	value	0.0999595408132078	3.98881749469276	0	NA	NA	NA
I_1507809	I	1507809	value	0.121555821539555	3.98881749469276	0	NA	NA	NA
I_1507992	I	1507992	value	0.462109200862726	3.98881749469276	0	NA	NA	NA
I_1508035	I	1508035	value	0.026814418695285	3.98881749469276	0	NA	NA	NA
I_1508262	I	1508262	value	0.23790775768555	3.98881749469276	0	NA	NA	NA
I_1508269	I	1508269	value	0.137681303079327	3.98881749469276	0	NA	NA	NA
I_1509042	I	1509042	value	0.151739550809573	3.98881749469276	0	NA	NA	NA
I_1509268	I	1509268	value	0.282619645777715	3.98881749469276	0	NA	NA	NA
I_1510450	I	1510450	value	0.200818040836716	3.98881749469276	0	NA	NA	NA
I_1510845	I	1510845	value	0.0267138452018769	3.98881749469276	0	NA	NA	NA
I_1511208	I	1511208	value	0.0760121704171266	3.98881749469276	0	NA	NA	NA
I_1512358	I	1512358	value	0.0490088181600538	3.98881749469276	0	NA	NA	NA
I_1513230	I	1513230	value	0.040869227005559	3.98881749469276	0	NA	NA	NA
I_1513749	I	1513749	value	0.325011072670197	3.98881749469276	0	NA	NA	NA
I_1515823	I	1515823	value	0.224425672000127	3.98881749469276	0	NA	NA	NA
I_1515882	I	1515882	value	0.061553426067854	3.98881749469276	0	NA	NA	NA
I_1515965	I	1515965	value	0.0375937906818203	3.98881749469276	0	NA	NA	NA
I_1516044	I	1516044	value	0.100791882861181	3.98881749469276	0	NA	NA	NA
I_1516274	I	1516274	value	0.0191835031827571	3.98881749469276	0	NA	NA	NA
I_1517291	I	1517291	value	0.200818040836716	3.98881749469276	0	NA	NA	NA
I_1517493	I	1517493	value	0.162911979485489	3.98881749469276	0	NA	NA	NA
I_1519079	I	1519079	value	0.0772294686689837	3.98881749469276	0	NA	NA	NA
I_1520587	I	1520587	value	0.110395357591708	3.98881749469276	0	NA	NA	NA
I_1520768	I	1520768	value	0.174716126633073	3.98881749469276	0	NA	NA	NA
I_1522824	I	1522824	value	0.0772294686689837	3.98881749469276	0	NA	NA	NA
I_1524766	I	1524766	value	0.0287031935143924	3.98881749469276	0	NA	NA	NA
I_1525477	I	1525477	value	0.103989095425118	3.98881749469276	0	NA	NA	NA
I_1525583	I	1525583	value	0.13074189879786	3.98881749469276	0	NA	NA	NA
I_1525625	I	1525625	value	0.165512358192865	3.98881749469276	0	NA	NA	NA
I_1525982	I	1525982	value	0.190195781275429	3.98881749469276	0	NA	NA	NA
I_1526759	I	1526759	value	0.195647817192326	3.98881749469276	0	NA	NA	NA
I_1527647	I	1527647	value	0.0485046524912137	3.98881749469276	0	NA	NA	NA
I_1528416	I	1528416	value	0.0419335265351736	3.98881749469276	0	NA	NA	NA
I_1529216	I	1529216	value	0.152754540041459	3.98881749469276	0	NA	NA	NA
I_1529607	I	1529607	value	0.331670503390235	3.98881749469276	0	NA	NA	NA
I_1531623	I	1531623	value	0.110086467171881	3.98881749469276	0	NA	NA	NA
I_1531937	I	1531937	value	0.204044513586042	3.98881749469276	0	NA	NA	NA
I_1532843	I	1532843	value	0.373790170445835	3.98881749469276	0	NA	NA	NA
I_1533040	I	1533040	value	0.194198606267636	3.98881749469276	0	NA	NA	NA
I_1533177	I	1533177	value	0.21290852265214	3.98881749469276	0	NA	NA	NA
I_1533491	I	1533491	value	0.205727294139522	3.98881749469276	0	NA	NA	NA
I_1534468	I	1534468	value	0.0890907460949215	3.98881749469276	0	NA	NA	NA
I_1535972	I	1535972	value	0.150662515699753	3.98881749469276	0	NA	NA	NA
I_1538735	I	1538735	value	0.0985318456846647	3.98881749469276	0	NA	NA	NA
I_1539017	I	1539017	value	0.125836381372858	3.98881749469276	0	NA	NA	NA
I_1539483	I	1539483	value	0.0762929303723954	3.98881749469276	0	NA	NA	NA
I_1540366	I	1540366	value	0.353408429582534	3.98881749469276	0	NA	NA	NA
I_1540400	I	1540400	value	0.00469610732488471	3.98881749469276	0	NA	NA	NA
I_1540575	I	1540575	value	0.040869227005559	3.98881749469276	0	NA	NA	NA
I_1541340	I	1541340	value	0.0627300638654796	3.98881749469276	0	NA	NA	NA
I_1541543	I	1541543	value	0.136370536747207	3.98881749469276	0	NA	NA	NA
I_1549969	I	1549969	value	0.0774117858977317	3.98881749469276	0	NA	NA	NA
I_1550509	I	1550509	value	0.221792909190067	3.98881749469276	0	NA	NA	NA
I_1551641	I	1551641	value	0.238136087410566	3.98881749469276	0	NA	NA	NA
I_1552332	I	1552332	value	0.00576559546265982	3.98881749469276	0	NA	NA	NA
I_1552914	I	1552914	value	0.205729500960014	3.98881749469276	0	NA	NA	NA
I_1554278	I	1554278	value	0.0488291775816955	3.98881749469276	0	NA	NA	NA
I_1557266	I	1557266	value	0.234043483080779	3.98881749469276	0	NA	NA	NA
I_1557984	I	1557984	value	0.265408031852868	3.98881749469276	0	NA	NA	NA
I_1561093	I	1561093	value	0.0488291775816955	3.98881749469276	0	NA	NA	NA
I_1563730	I	1563730	value	0.02039253133119	3.98881749469276	0	NA	NA	NA
I_1566706	I	1566706	value	0.139030235175044	3.98881749469276	0	NA	NA	NA
I_1566895	I	1566895	value	0.156269285866698	3.98881749469276	0	NA	NA	NA
I_1567176	I	1567176	value	0.0402309455186378	3.98881749469276	0	NA	NA	NA
I_1567450	I	1567450	value	0.360132849495594	3.98881749469276	0	NA	NA	NA
I_1567753	I	1567753	value	0.0903546179247963	3.98881749469276	0	NA	NA	NA
I_1568571	I	1568571	value	0.130262894443827	3.98881749469276	0	NA	NA	NA
I_1568647	I	1568647	value	0.202231203350784	3.98881749469276	0	NA	NA	NA
I_1568822	I	1568822	value	0.389523040925124	3.98881749469276	0	NA	NA	NA
I_1570291	I	1570291	value	0.0456650447979398	3.98881749469276	0	NA	NA	NA
I_1571268	I	1571268	value	0.176913216113914	3.98881749469276	0	NA	NA	NA
I_1571388	I	1571388	value	0.205727294139522	3.98881749469276	0	NA	NA	NA
I_1572287	I	1572287	value	0.081591477480995	3.98881749469276	0	NA	NA	NA
I_1572898	I	1572898	value	0.0448967391362004	3.98881749469276	0	NA	NA	NA
I_1573138	I	1573138	value	0.0386227456284586	3.98881749469276	0	NA	NA	NA
I_1573198	I	1573198	value	0.0434234119659138	3.98881749469276	0	NA	NA	NA
I_1573296	I	1573296	value	0.339049934890145	3.98881749469276	0	NA	NA	NA
I_1574528	I	1574528	value	0.00576559546265982	3.98881749469276	0	NA	NA	NA
I_1574568	I	1574568	value	0.130262894443827	3.98881749469276	0	NA	NA	NA
I_1574890	I	1574890	value	0.529822581688269	3.98881749469276	0	NA	NA	NA
I_1575209	I	1575209	value	0.859215681027103	3.98881749469276	0	NA	NA	NA
I_1575351	I	1575351	value	1.07159309099427	3.98881749469276	0	NA	NA	NA
I_1575396	I	1575396	value	0.487018450847633	3.98881749469276	0	NA	NA	NA
I_1575461	I	1575461	value	0.502810240136237	3.98881749469276	0	NA	NA	NA
I_1575532	I	1575532	value	0.310016272449096	3.98881749469276	0	NA	NA	NA
I_1575836	I	1575836	value	0.0329500334571751	3.98881749469276	0	NA	NA	NA
I_1576110	I	1576110	value	0.179848232681628	3.98881749469276	0	NA	NA	NA
I_1576437	I	1576437	value	0.298251658340121	3.98881749469276	0	NA	NA	NA
I_1578094	I	1578094	value	0.117211874088842	3.98881749469276	0	NA	NA	NA
I_1578465	I	1578465	value	0.0372181997527337	3.98881749469276	0	NA	NA	NA
I_1578774	I	1578774	value	0.155226286366192	3.98881749469276	0	NA	NA	NA
I_1581157	I	1581157	value	0.250250450042689	3.98881749469276	0	NA	NA	NA
I_1581196	I	1581196	value	0.210339238070294	3.98881749469276	0	NA	NA	NA
I_1581660	I	1581660	value	1.83129159403907	3.98881749469276	0	NA	NA	NA
I_1581701	I	1581701	value	0.0937306467112194	3.98881749469276	0	NA	NA	NA
I_1582254	I	1582254	value	0.210325422415261	3.98881749469276	0	NA	NA	NA
I_1582370	I	1582370	value	0.00200742785721586	3.98881749469276	0	NA	NA	NA
I_1584704	I	1584704	value	0.906675238142873	3.98881749469276	0	NA	NA	NA
I_1584792	I	1584792	value	0.868652469957539	3.98881749469276	0	NA	NA	NA
I_1585923	I	1585923	value	0.093788849545285	3.98881749469276	0	NA	NA	NA
I_1585986	I	1585986	value	0.203907383744064	3.98881749469276	0	NA	NA	NA
I_1586350	I	1586350	value	0.210325422415261	3.98881749469276	0	NA	NA	NA
I_1587322	I	1587322	value	0.204942121824511	3.98881749469276	0	NA	NA	NA
I_1588561	I	1588561	value	0.148533421375174	3.98881749469276	0	NA	NA	NA
I_1588888	I	1588888	value	0.0434234119659138	3.98881749469276	0	NA	NA	NA
I_1589094	I	1589094	value	0.170755560706007	3.98881749469276	0	NA	NA	NA
I_1589382	I	1589382	value	0.0448967391362004	3.98881749469276	0	NA	NA	NA
I_1590175	I	1590175	value	0.093788849545285	3.98881749469276	0	NA	NA	NA
I_1591017	I	1591017	value	0.0903546179247963	3.98881749469276	0	NA	NA	NA
I_1592733	I	1592733	value	0.188667505968238	3.98881749469276	0	NA	NA	NA
I_1597066	I	1597066	value	0.205729500960014	3.98881749469276	0	NA	NA	NA
I_1597067	I	1597067	value	0.330552864769814	3.98881749469276	0	NA	NA	NA
I_1597269	I	1597269	value	0.060993931607123	3.98881749469276	0	NA	NA	NA
I_1598497	I	1598497	value	0.117211874088842	3.98881749469276	0	NA	NA	NA
I_1598994	I	1598994	value	0.04464551472472	3.98881749469276	0	NA	NA	NA
I_1600075	I	1600075	value	0.393405947313863	3.98881749469276	0	NA	NA	NA
I_1600076	I	1600076	value	0.541834051653603	3.98881749469276	0	NA	NA	NA
I_1601017	I	1601017	value	0.0329500334571751	3.98881749469276	0	NA	NA	NA
I_1603506	I	1603506	value	0.405289571049811	3.98881749469276	0	NA	NA	NA
I_1603745	I	1603745	value	0.2257483585337	3.98881749469276	0	NA	NA	NA
I_1604120	I	1604120	value	0.027871778639625	3.98881749469276	0	NA	NA	NA
I_1604842	I	1604842	value	0.309734112657484	3.98881749469276	0	NA	NA	NA
I_1605073	I	1605073	value	0.275484451118399	3.98881749469276	0	NA	NA	NA
I_1605098	I	1605098	value	0.257964463928265	3.98881749469276	0	NA	NA	NA
I_1605193	I	1605193	value	1.56022958986778	3.98881749469276	0	NA	NA	NA
I_1605369	I	1605369	value	0.249454064498322	3.98881749469276	0	NA	NA	NA
I_1606208	I	1606208	value	0.301992785829917	3.98881749469276	0	NA	NA	NA
I_1606465	I	1606465	value	0.0937306467112194	3.98881749469276	0	NA	NA	NA
I_1606907	I	1606907	value	0.797596001379926	3.98881749469276	0	NA	NA	NA
I_1606973	I	1606973	value	1.48437395147248	3.98881749469276	0	NA	NA	NA
I_1608095	I	1608095	value	0.0608712598510909	3.98881749469276	0	NA	NA	NA
I_1608593	I	1608593	value	0.276219808739612	3.98881749469276	0	NA	NA	NA
I_1608778	I	1608778	value	0.225627861439318	3.98881749469276	0	NA	NA	NA
I_1609416	I	1609416	value	0.250250450042689	3.98881749469276	0	NA	NA	NA
I_1610434	I	1610434	value	0.266961213253485	3.98881749469276	0	NA	NA	NA
I_1612296	I	1612296	value	0.192550935863363	3.98881749469276	0	NA	NA	NA
I_1612343	I	1612343	value	0.205729500960014	3.98881749469276	0	NA	NA	NA
I_1612456	I	1612456	value	0.122794299932365	3.98881749469276	0	NA	NA	NA
I_1614151	I	1614151	value	0.130262894443827	3.98881749469276	0	NA	NA	NA
I_1614974	I	1614974	value	0.121588233066443	3.98881749469276	0	NA	NA	NA
I_1615304	I	1615304	value	0.219516242639207	3.98881749469276	0	NA	NA	NA
I_1615338	I	1615338	value	0.0604369290968161	3.98881749469276	0	NA	NA	NA
I_1615534	I	1615534	value	0.151097087905875	3.98881749469276	0	NA	NA	NA
I_1615997	I	1615997	value	0.0182782285902345	3.98881749469276	0	NA	NA	NA
I_1616116	I	1616116	value	0.175819635941005	3.98881749469276	0	NA	NA	NA
I_1616410	I	1616410	value	0.0459406399293264	3.98881749469276	0	NA	NA	NA
I_1616506	I	1616506	value	0.246292765884619	3.98881749469276	0	NA	NA	NA
I_1616806	I	1616806	value	1.02555614868567	3.98881749469276	0	NA	NA	NA
I_1617678	I	1617678	value	0.716439120775983	3.98881749469276	0	NA	NA	NA
I_1618081	I	1618081	value	0.110416856408163	3.98881749469276	0	NA	NA	NA
I_1619970	I	1619970	value	0.583788150010348	3.98881749469276	0	NA	NA	NA
I_1620000	I	1620000	value	0.0249355037153209	3.98881749469276	0	NA	NA	NA
I_1622075	I	1622075	value	0.703233752485128	3.98881749469276	0	NA	NA	NA
I_1622635	I	1622635	value	0.175295838211907	3.98881749469276	0	NA	NA	NA
I_1622939	I	1622939	value	0.141320935619763	3.98881749469276	0	NA	NA	NA
I_1624208	I	1624208	value	0.0525448420311793	3.98881749469276	0	NA	NA	NA
I_1624422	I	1624422	value	0.0459406399293264	3.98881749469276	0	NA	NA	NA
I_1624599	I	1624599	value	0.141952527933689	3.98881749469276	0	NA	NA	NA
I_1624617	I	1624617	value	0.274836951135151	3.98881749469276	0	NA	NA	NA
I_1625058	I	1625058	value	0.247729021018103	3.98881749469276	0	NA	NA	NA
I_1625401	I	1625401	value	0.192550935863363	3.98881749469276	0	NA	NA	NA
I_1625659	I	1625659	value	0.443371787707395	3.98881749469276	0	NA	NA	NA
I_1626301	I	1626301	value	0.37656698364704	3.98881749469276	0	NA	NA	NA
I_1627088	I	1627088	value	0.560386899284021	3.98881749469276	0	NA	NA	NA
I_1630820	I	1630820	value	0.188667505968238	3.98881749469276	0	NA	NA	NA
I_1631819	I	1631819	value	0.257421368527809	3.98881749469276	0	NA	NA	NA
I_1631930	I	1631930	value	0.12095524109443	3.98881749469276	0	NA	NA	NA
I_1632671	I	1632671	value	0.0459406399293264	3.98881749469276	0	NA	NA	NA
I_1634254	I	1634254	value	0.282355237955578	3.98881749469276	0	NA	NA	NA
I_1635052	I	1635052	value	0.485494654559673	3.98881749469276	0	NA	NA	NA
I_1637517	I	1637517	value	0.188667505968238	3.98881749469276	0	NA	NA	NA
I_1639384	I	1639384	value	0.101096941661721	3.98881749469276	0	NA	NA	NA
I_1639560	I	1639560	value	0.0139377289161697	3.98881749469276	0	NA	NA	NA
I_1639561	I	1639561	value	0.355163879253635	3.98881749469276	0	NA	NA	NA
I_1639890	I	1639890	value	0.13200755703274	3.98881749469276	0	NA	NA	NA
I_1640743	I	1640743	value	0.392338856682547	3.98881749469276	0	NA	NA	NA
I_1647512	I	1647512	value	0.188667505968238	3.98881749469276	0	NA	NA	NA
I_1649783	I	1649783	value	0.231722930998455	3.98881749469276	0	NA	NA	NA
I_1649959	I	1649959	value	0.156839308784249	3.98881749469276	0	NA	NA	NA
I_1650288	I	1650288	value	0.0459406399293264	3.98881749469276	0	NA	NA	NA
I_1650459	I	1650459	value	0.256033277857414	3.98881749469276	0	NA	NA	NA
I_1652770	I	1652770	value	0.429198342566408	3.98881749469276	0	NA	NA	NA
I_1653702	I	1653702	value	0.328172723075216	3.98881749469276	0	NA	NA	NA
I_1654361	I	1654361	value	0.217671059093788	3.98881749469276	0	NA	NA	NA
I_1654661	I	1654661	value	0.188667505968238	3.98881749469276	0	NA	NA	NA
I_1656062	I	1656062	value	0.429703369220384	3.98881749469276	0	NA	NA	NA
I_1656763	I	1656763	value	0.0747115881208466	3.98881749469276	0	NA	NA	NA
I_1657214	I	1657214	value	0.429990750550629	3.98881749469276	0	NA	NA	NA
I_1657899	I	1657899	value	0.0233759065548204	3.98881749469276	0	NA	NA	NA
I_1657940	I	1657940	value	0.12810802348682	3.98881749469276	0	NA	NA	NA
I_1660874	I	1660874	value	0.0937306467112194	3.98881749469276	0	NA	NA	NA
I_1661497	I	1661497	value	0.287721780234205	3.98881749469276	0	NA	NA	NA
I_1661564	I	1661564	value	0.117500258621011	3.98881749469276	0	NA	NA	NA
I_1664043	I	1664043	value	0.169815595922299	3.98881749469276	0	NA	NA	NA
I_1665060	I	1665060	value	0.188667505968238	3.98881749469276	0	NA	NA	NA
I_1667843	I	1667843	value	0.598994661363229	3.98881749469276	0	NA	NA	NA
I_1668607	I	1668607	value	0.141320935619763	3.98881749469276	0	NA	NA	NA
I_1668745	I	1668745	value	0.16300690276911	3.98881749469276	0	NA	NA	NA
I_1673141	I	1673141	value	0.283679765538023	3.98881749469276	0	NA	NA	NA
I_1673170	I	1673170	value	0.0412590116873683	3.98881749469276	0	NA	NA	NA
I_1674291	I	1674291	value	0.444514543582216	3.98881749469276	0	NA	NA	NA
I_1674796	I	1674796	value	0.0261025073279788	3.98881749469276	0	NA	NA	NA
I_1677002	I	1677002	value	0.496802895724023	3.98881749469276	0	NA	NA	NA
I_1677288	I	1677288	value	0.235303539750791	3.98881749469276	0	NA	NA	NA
I_1677916	I	1677916	value	0.785056793899327	3.98881749469276	0	NA	NA	NA
I_1678618	I	1678618	value	0.34391057673411	3.98881749469276	0	NA	NA	NA
I_1679350	I	1679350	value	0.287344930243833	3.98881749469276	0	NA	NA	NA
I_1681523	I	1681523	value	0.0218718551786698	3.98881749469276	0	NA	NA	NA
I_1681731	I	1681731	value	0.0458287285318498	3.98881749469276	0	NA	NA	NA
I_1682417	I	1682417	value	0.0168783341666386	3.98881749469276	0	NA	NA	NA
I_1683248	I	1683248	value	0.485494654559673	3.98881749469276	0	NA	NA	NA
I_1683528	I	1683528	value	0.754216482450376	3.98881749469276	0	NA	NA	NA
I_1684306	I	1684306	value	0.417367240027688	3.98881749469276	0	NA	NA	NA
I_1685903	I	1685903	value	0.339946173790206	3.98881749469276	0	NA	NA	NA
I_1688102	I	1688102	value	0.224069860956431	3.98881749469276	0	NA	NA	NA
I_1688213	I	1688213	value	0.104010933638687	3.98881749469276	0	NA	NA	NA
I_1689971	I	1689971	value	0.275966092833373	3.98881749469276	0	NA	NA	NA
I_1690472	I	1690472	value	0.151588486304569	3.98881749469276	0	NA	NA	NA
I_1692364	I	1692364	value	0.0255435155341142	3.98881749469276	0	NA	NA	NA
I_1692464	I	1692464	value	0.330180120351236	3.98881749469276	0	NA	NA	NA
I_1693624	I	1693624	value	0.235303539750791	3.98881749469276	0	NA	NA	NA
I_1693732	I	1693732	value	0.0118509534026993	3.98881749469276	0	NA	NA	NA
I_1693774	I	1693774	value	0.0969323297446724	3.98881749469276	0	NA	NA	NA
I_1694312	I	1694312	value	0.209781976977934	3.98881749469276	0	NA	NA	NA
I_1694316	I	1694316	value	0.16300690276911	3.98881749469276	0	NA	NA	NA
I_1695159	I	1695159	value	0.765759268203733	3.98881749469276	0	NA	NA	NA
I_1696052	I	1696052	value	1.07809777343849	3.98881749469276	0	NA	NA	NA
I_1696901	I	1696901	value	0.521749905332275	3.98881749469276	0	NA	NA	NA
I_1696999	I	1696999	value	0.584313682153121	3.98881749469276	0	NA	NA	NA
I_1697288	I	1697288	value	0.517100708140535	3.98881749469276	0	NA	NA	NA
I_1697431	I	1697431	value	0.330180120351236	3.98881749469276	0	NA	NA	NA
I_1698158	I	1698158	value	0.0424060740020606	3.98881749469276	0	NA	NA	NA
I_1700392	I	1700392	value	0.118614663800036	3.98881749469276	0	NA	NA	NA
I_1700510	I	1700510	value	0.0515314480255383	3.98881749469276	0	NA	NA	NA
I_1701151	I	1701151	value	0.417367240027688	3.98881749469276	0	NA	NA	NA
I_1702711	I	1702711	value	0.133050919616795	3.98881749469276	0	NA	NA	NA
I_1703532	I	1703532	value	0.581297883294169	3.98881749469276	0	NA	NA	NA
I_1703671	I	1703671	value	0.0764350042496128	3.98881749469276	0	NA	NA	NA
I_1704511	I	1704511	value	0.319368364850368	3.98881749469276	0	NA	NA	NA
I_1704820	I	1704820	value	0.736200337439031	3.98881749469276	0	NA	NA	NA
I_1705270	I	1705270	value	0.0707169863272388	3.98881749469276	0	NA	NA	NA
I_1706465	I	1706465	value	0.0791593145704535	3.98881749469276	0	NA	NA	NA
I_1706532	I	1706532	value	0.292789823560605	3.98881749469276	0	NA	NA	NA
I_1706721	I	1706721	value	0.00707692210841959	3.98881749469276	0	NA	NA	NA
I_1706896	I	1706896	value	0.0178068743251503	3.98881749469276	0	NA	NA	NA
I_1706897	I	1706897	value	0.326491443900053	3.98881749469276	0	NA	NA	NA
I_1707286	I	1707286	value	0.10620998931777	3.98881749469276	0	NA	NA	NA
I_1707304	I	1707304	value	0.059208359144915	3.98881749469276	0	NA	NA	NA
I_1708042	I	1708042	value	1.4086860552336	3.98881749469276	0	NA	NA	NA
I_1708600	I	1708600	value	0.0804179615471139	3.98881749469276	0	NA	NA	NA
I_1709092	I	1709092	value	0.0875576868890698	3.98881749469276	0	NA	NA	NA
I_1709542	I	1709542	value	0.485494654559673	3.98881749469276	0	NA	NA	NA
I_1710322	I	1710322	value	0.68338872385318	3.98881749469276	0	NA	NA	NA
I_1711285	I	1711285	value	0.16300690276911	3.98881749469276	0	NA	NA	NA
I_1711361	I	1711361	value	0.0643528910266711	3.98881749469276	0	NA	NA	NA
I_1711473	I	1711473	value	0.0248610212108395	3.98881749469276	0	NA	NA	NA
I_1711506	I	1711506	value	0.0576602172222015	3.98881749469276	0	NA	NA	NA
I_1711618	I	1711618	value	0.596642927911764	3.98881749469276	0	NA	NA	NA
I_1711715	I	1711715	value	0.123703328585427	3.98881749469276	0	NA	NA	NA
I_1712435	I	1712435	value	0.173582563999329	3.98881749469276	0	NA	NA	NA
I_1713925	I	1713925	value	1.77247813564605	3.98881749469276	0	NA	NA	NA
I_1714285	I	1714285	value	0.237522672313231	3.98881749469276	0	NA	NA	NA
I_1714419	I	1714419	value	1.94413444913879	3.98881749469276	0	NA	NA	NA
I_1714530	I	1714530	value	0.376133536675161	3.98881749469276	0	NA	NA	NA
I_1714591	I	1714591	value	1.71676596914801	3.98881749469276	0	NA	NA	NA
I_1714645	I	1714645	value	1.24539166467834	3.98881749469276	0	NA	NA	NA
I_1715029	I	1715029	value	0.194927093452108	3.98881749469276	0	NA	NA	NA
I_1715441	I	1715441	value	0.142260639709134	3.98881749469276	0	NA	NA	NA
I_1715496	I	1715496	value	0.244482042484601	3.98881749469276	0	NA	NA	NA
I_1715834	I	1715834	value	0.427043680210169	3.98881749469276	0	NA	NA	NA
I_1715851	I	1715851	value	0.153346501617361	3.98881749469276	0	NA	NA	NA
I_1717250	I	1717250	value	0.335939609410625	3.98881749469276	0	NA	NA	NA
I_1717360	I	1717360	value	0.234346840592338	3.98881749469276	0	NA	NA	NA
I_1717557	I	1717557	value	0.16300690276911	3.98881749469276	0	NA	NA	NA
I_1718035	I	1718035	value	0.296898247055406	3.98881749469276	0	NA	NA	NA
I_1718288	I	1718288	value	0.348582545193031	3.98881749469276	0	NA	NA	NA
I_1718739	I	1718739	value	0.566438753588834	3.98881749469276	0	NA	NA	NA
I_1718986	I	1718986	value	0.347820409895831	3.98881749469276	0	NA	NA	NA
I_1719435	I	1719435	value	0.296259431191638	3.98881749469276	0	NA	NA	NA
I_1725528	I	1725528	value	0.317405228082194	3.98881749469276	0	NA	NA	NA
I_1725811	I	1725811	value	0.205727294139522	3.98881749469276	0	NA	NA	NA
I_1725858	I	1725858	value	0.139780753103914	3.98881749469276	0	NA	NA	NA
I_1727192	I	1727192	value	0.141320935619763	3.98881749469276	0	NA	NA	NA
I_1727337	I	1727337	value	0.338991548883745	3.98881749469276	0	NA	NA	NA
I_1729576	I	1729576	value	0.23241899264719	3.98881749469276	0	NA	NA	NA
I_1730067	I	1730067	value	0.476343508805663	3.98881749469276	0	NA	NA	NA
I_1731008	I	1731008	value	0.130883690195101	3.98881749469276	0	NA	NA	NA
I_1731687	I	1731687	value	0.269664561045312	3.98881749469276	0	NA	NA	NA
I_1731821	I	1731821	value	0.16300690276911	3.98881749469276	0	NA	NA	NA
I_1732348	I	1732348	value	0.0495450952458507	3.98881749469276	0	NA	NA	NA
I_1733248	I	1733248	value	0.00612250600502865	3.98881749469276	0	NA	NA	NA
I_1738955	I	1738955	value	0.0810575238140383	3.98881749469276	0	NA	NA	NA
I_1739301	I	1739301	value	0.667580733544083	3.98881749469276	0	NA	NA	NA
I_1739370	I	1739370	value	0.31509239990663	3.98881749469276	0	NA	NA	NA
I_1739418	I	1739418	value	0.366386338173839	3.98881749469276	0	NA	NA	NA
I_1740998	I	1740998	value	0.68630258593069	3.98881749469276	0	NA	NA	NA
I_1741155	I	1741155	value	0.37744177099064	3.98881749469276	0	NA	NA	NA
I_1741927	I	1741927	value	0.276076537874842	3.98881749469276	0	NA	NA	NA
I_1742005	I	1742005	value	0.181139914075822	3.98881749469276	0	NA	NA	NA
I_1742057	I	1742057	value	0.0684642206417527	3.98881749469276	0	NA	NA	NA
I_1742173	I	1742173	value	0.291567756195696	3.98881749469276	0	NA	NA	NA
I_1742994	I	1742994	value	0.121533961599673	3.98881749469276	0	NA	NA	NA
I_1743375	I	1743375	value	0.198822600546788	3.98881749469276	0	NA	NA	NA
I_1743663	I	1743663	value	0.0298298832600032	3.98881749469276	0	NA	NA	NA
I_1743801	I	1743801	value	0.712371010202987	3.98881749469276	0	NA	NA	NA
I_1743935	I	1743935	value	0.213787196064844	3.98881749469276	0	NA	NA	NA
I_1744104	I	1744104	value	0.0587573571206884	3.98881749469276	0	NA	NA	NA
I_1744674	I	1744674	value	0.000563616765016389	3.98881749469276	0	NA	NA	NA
I_1745131	I	1745131	value	0.13697158261813	3.98881749469276	0	NA	NA	NA
I_1745337	I	1745337	value	0.58021566673229	3.98881749469276	0	NA	NA	NA
I_1745545	I	1745545	value	0.458853698866738	3.98881749469276	0	NA	NA	NA
I_1746038	I	1746038	value	0.114058844090004	3.98881749469276	0	NA	NA	NA
I_1746370	I	1746370	value	0.154732759009069	3.98881749469276	0	NA	NA	NA
I_1747919	I	1747919	value	0.731440326606786	3.98881749469276	0	NA	NA	NA
I_1748624	I	1748624	value	0.176091210558312	3.98881749469276	0	NA	NA	NA
I_1749852	I	1749852	value	0.544688532723668	3.98881749469276	0	NA	NA	NA
I_1750001	I	1750001	value	0.232002937620797	3.98881749469276	0	NA	NA	NA
I_1750101	I	1750101	value	0.0214131540477296	3.98881749469276	0	NA	NA	NA
I_1750438	I	1750438	value	0.476296015276475	3.98881749469276	0	NA	NA	NA
I_1750518	I	1750518	value	0.465581928781487	3.98881749469276	0	NA	NA	NA
I_1751224	I	1751224	value	0.241769065603643	3.98881749469276	0	NA	NA	NA
I_1751453	I	1751453	value	0.577133284131839	3.98881749469276	0	NA	NA	NA
I_1752199	I	1752199	value	0.114737579827478	3.98881749469276	0	NA	NA	NA
I_1752297	I	1752297	value	0.335939609410625	3.98881749469276	0	NA	NA	NA
I_1752474	I	1752474	value	0.458851184286902	3.98881749469276	0	NA	NA	NA
I_1752490	I	1752490	value	0.489263592737333	3.98881749469276	0	NA	NA	NA
I_1752491	I	1752491	value	0.362664887333328	3.98881749469276	0	NA	NA	NA
I_1753436	I	1753436	value	0.0275641166079921	3.98881749469276	0	NA	NA	NA
I_1753941	I	1753941	value	0.515602621611157	3.98881749469276	0	NA	NA	NA
I_1754338	I	1754338	value	0.217671059093788	3.98881749469276	0	NA	NA	NA
I_1754907	I	1754907	value	0.723077730186218	3.98881749469276	0	NA	NA	NA
I_1755068	I	1755068	value	0.113316947363054	3.98881749469276	0	NA	NA	NA
I_1755143	I	1755143	value	0.0641063364619823	3.98881749469276	0	NA	NA	NA
I_1755357	I	1755357	value	0.600724301001991	3.98881749469276	0	NA	NA	NA
I_1755642	I	1755642	value	0.727963685740335	3.98881749469276	0	NA	NA	NA
I_1755643	I	1755643	value	0.19088213910942	3.98881749469276	0	NA	NA	NA
I_1758728	I	1758728	value	0.00679009988407796	3.98881749469276	0	NA	NA	NA
I_1759606	I	1759606	value	0.648051557193585	3.98881749469276	0	NA	NA	NA
I_1760917	I	1760917	value	0.33762291594376	3.98881749469276	0	NA	NA	NA
I_1761707	I	1761707	value	0.463808095144288	3.98881749469276	0	NA	NA	NA
I_1762021	I	1762021	value	0.719127639404306	3.98881749469276	0	NA	NA	NA
I_1762305	I	1762305	value	0.307882328442685	3.98881749469276	0	NA	NA	NA
I_1763010	I	1763010	value	0.0164169887472303	3.98881749469276	0	NA	NA	NA
I_1763350	I	1763350	value	0.729177220914945	3.98881749469276	0	NA	NA	NA
I_1763385	I	1763385	value	0.515748406669909	3.98881749469276	0	NA	NA	NA
I_1763495	I	1763495	value	0.486622304892172	3.98881749469276	0	NA	NA	NA
I_1763719	I	1763719	value	0.246723511624313	3.98881749469276	0	NA	NA	NA
I_1764449	I	1764449	value	0.0222204050591424	3.98881749469276	0	NA	NA	NA
I_1764616	I	1764616	value	0.0101584432251141	3.98881749469276	0	NA	NA	NA
I_1765089	I	1765089	value	0.0193505696411365	3.98881749469276	0	NA	NA	NA
I_1765246	I	1765246	value	0.0851711215440743	3.98881749469276	0	NA	NA	NA
I_1766748	I	1766748	value	0.0448967391362004	3.98881749469276	0	NA	NA	NA
I_1766913	I	1766913	value	0.222501535056176	3.98881749469276	0	NA	NA	NA
I_1767057	I	1767057	value	0.0359741039371362	3.98881749469276	0	NA	NA	NA
I_1767082	I	1767082	value	0.245532943418285	3.98881749469276	0	NA	NA	NA
I_1767135	I	1767135	value	0.345258623309494	3.98881749469276	0	NA	NA	NA
I_1767261	I	1767261	value	0.10121855796614	3.98881749469276	0	NA	NA	NA
I_1767495	I	1767495	value	0.526095142289492	3.98881749469276	0	NA	NA	NA
I_1767779	I	1767779	value	0.237283491949182	3.98881749469276	0	NA	NA	NA
I_1768833	I	1768833	value	0.263384507761344	3.98881749469276	0	NA	NA	NA
I_1768874	I	1768874	value	0.245161213377215	3.98881749469276	0	NA	NA	NA
I_1769382	I	1769382	value	0.407592793285913	3.98881749469276	0	NA	NA	NA
I_1769538	I	1769538	value	0.0266014266976684	3.98881749469276	0	NA	NA	NA
I_1770282	I	1770282	value	0.430005535604106	3.98881749469276	0	NA	NA	NA
I_1770334	I	1770334	value	0.11040615532748	3.98881749469276	0	NA	NA	NA
I_1770379	I	1770379	value	0.0819172077289282	3.98881749469276	0	NA	NA	NA
I_1770837	I	1770837	value	0.0626043602521893	3.98881749469276	0	NA	NA	NA
I_1771236	I	1771236	value	0.0606112963476957	3.98881749469276	0	NA	NA	NA
I_1771537	I	1771537	value	0.463808095144288	3.98881749469276	0	NA	NA	NA
I_1771992	I	1771992	value	0.110672596604282	3.98881749469276	0	NA	NA	NA
I_1772010	I	1772010	value	0.287405015577531	3.98881749469276	0	NA	NA	NA
I_1772718	I	1772718	value	0.697578836736513	3.98881749469276	0	NA	NA	NA
I_1773988	I	1773988	value	0.162267640302276	3.98881749469276	0	NA	NA	NA
I_1774061	I	1774061	value	0.20143802106658	3.98881749469276	0	NA	NA	NA
I_1775995	I	1775995	value	0.0448967391362004	3.98881749469276	0	NA	NA	NA
I_1776454	I	1776454	value	0.391505738149539	3.98881749469276	0	NA	NA	NA
I_1776997	I	1776997	value	0.455550472488719	3.98881749469276	0	NA	NA	NA
I_1777010	I	1777010	value	0.247342677742955	3.98881749469276	0	NA	NA	NA
I_1777085	I	1777085	value	0.080025518598972	3.98881749469276	0	NA	NA	NA
I_1777098	I	1777098	value	0.104963759860549	3.98881749469276	0	NA	NA	NA
I_1777648	I	1777648	value	0.511014155813828	3.98881749469276	0	NA	NA	NA
I_1777823	I	1777823	value	0.241769065603643	3.98881749469276	0	NA	NA	NA
I_1778251	I	1778251	value	0.463808095144288	3.98881749469276	0	NA	NA	NA
I_1779709	I	1779709	value	0.683264640603333	3.98881749469276	0	NA	NA	NA
I_1780968	I	1780968	value	0.900145527848675	3.98881749469276	0	NA	NA	NA
I_1781611	I	1781611	value	0.23165088379578	3.98881749469276	0	NA	NA	NA
I_1781713	I	1781713	value	0.440025626562188	3.98881749469276	0	NA	NA	NA
I_1782218	I	1782218	value	0.482461234354455	3.98881749469276	0	NA	NA	NA
I_1782873	I	1782873	value	0.127932057275531	3.98881749469276	0	NA	NA	NA
I_1782986	I	1782986	value	0.451210967366936	3.98881749469276	0	NA	NA	NA
I_1783515	I	1783515	value	0.00830008423679902	3.98881749469276	0	NA	NA	NA
I_1783569	I	1783569	value	0.107059280222352	3.98881749469276	0	NA	NA	NA
I_1783580	I	1783580	value	0.0664727133556249	3.98881749469276	0	NA	NA	NA
I_1783855	I	1783855	value	0.17918324813063	3.98881749469276	0	NA	NA	NA
I_1783959	I	1783959	value	0.556113739156079	3.98881749469276	0	NA	NA	NA
I_1783968	I	1783968	value	0.271505673217249	3.98881749469276	0	NA	NA	NA
I_1783969	I	1783969	value	0.530612661060521	3.98881749469276	0	NA	NA	NA
I_1784018	I	1784018	value	0.632734067156217	3.98881749469276	0	NA	NA	NA
I_1784230	I	1784230	value	0.683631270524817	3.98881749469276	0	NA	NA	NA
I_1784290	I	1784290	value	0.224491495149482	3.98881749469276	0	NA	NA	NA
I_1784706	I	1784706	value	0.390892181885958	3.98881749469276	0	NA	NA	NA
I_1784732	I	1784732	value	0.626243739679028	3.98881749469276	0	NA	NA	NA
I_1784809	I	1784809	value	0.524686647913075	3.98881749469276	0	NA	NA	NA
I_1785437	I	1785437	value	0.155238979003216	3.98881749469276	0	NA	NA	NA
I_1785632	I	1785632	value	0.469256656373677	3.98881749469276	0	NA	NA	NA
I_1785672	I	1785672	value	0.080025518598972	3.98881749469276	0	NA	NA	NA
I_1785787	I	1785787	value	0.177116611733412	3.98881749469276	0	NA	NA	NA
I_1785817	I	1785817	value	0.272353127490629	3.98881749469276	0	NA	NA	NA
I_1786591	I	1786591	value	0.253717564868323	3.98881749469276	0	NA	NA	NA
I_1786592	I	1786592	value	0.051487987734885	3.98881749469276	0	NA	NA	NA
I_1786600	I	1786600	value	0.0582365870428748	3.98881749469276	0	NA	NA	NA
I_1787486	I	1787486	value	0.125045786207553	3.98881749469276	0	NA	NA	NA
I_1787501	I	1787501	value	0.222557402519079	3.98881749469276	0	NA	NA	NA
I_1787777	I	1787777	value	1.04708871099884	3.98881749469276	0	NA	NA	NA
I_1787808	I	1787808	value	0.508937774360306	3.98881749469276	0	NA	NA	NA
I_1787889	I	1787889	value	0.104668517787927	3.98881749469276	0	NA	NA	NA
I_1787990	I	1787990	value	0.674253059836631	3.98881749469276	0	NA	NA	NA
I_1788351	I	1788351	value	0.949541457714703	3.98881749469276	0	NA	NA	NA
I_1788538	I	1788538	value	0.258878094816043	3.98881749469276	0	NA	NA	NA
I_1788926	I	1788926	value	0.328520310616568	3.98881749469276	0	NA	NA	NA
I_1789042	I	1789042	value	0.0281875076159132	3.98881749469276	0	NA	NA	NA
I_1789092	I	1789092	value	0.345258623309494	3.98881749469276	0	NA	NA	NA
I_1789208	I	1789208	value	0.523310827695134	3.98881749469276	0	NA	NA	NA
I_1789235	I	1789235	value	0.0571000374083105	3.98881749469276	0	NA	NA	NA
I_1789347	I	1789347	value	0.0251624662643392	3.98881749469276	0	NA	NA	NA
I_1789497	I	1789497	value	0.24268820681538	3.98881749469276	0	NA	NA	NA
I_1790118	I	1790118	value	0.104963759860549	3.98881749469276	0	NA	NA	NA
I_1790492	I	1790492	value	0.0499162309311045	3.98881749469276	0	NA	NA	NA
I_1790570	I	1790570	value	0.153498567379155	3.98881749469276	0	NA	NA	NA
I_1790822	I	1790822	value	0.463808095144288	3.98881749469276	0	NA	NA	NA
I_1791180	I	1791180	value	0.31514458546845	3.98881749469276	0	NA	NA	NA
I_1791183	I	1791183	value	0.123301975931955	3.98881749469276	0	NA	NA	NA
I_1791536	I	1791536	value	0.241769065603643	3.98881749469276	0	NA	NA	NA
I_1792727	I	1792727	value	0.688104828096014	3.98881749469276	0	NA	NA	NA
I_1792757	I	1792757	value	0.240313103073588	3.98881749469276	0	NA	NA	NA
I_1792883	I	1792883	value	0.0786630332006323	3.98881749469276	0	NA	NA	NA
I_1792910	I	1792910	value	0.050212476569028	3.98881749469276	0	NA	NA	NA
I_1792912	I	1792912	value	0.354560314910822	3.98881749469276	0	NA	NA	NA
I_1793040	I	1793040	value	0.101812328397445	3.98881749469276	0	NA	NA	NA
I_1795635	I	1795635	value	0.0134363858551549	3.98881749469276	0	NA	NA	NA
I_1796575	I	1796575	value	0.604108865096423	3.98881749469276	0	NA	NA	NA
I_1796592	I	1796592	value	0.171083124654181	3.98881749469276	0	NA	NA	NA
I_1796719	I	1796719	value	0.463808095144288	3.98881749469276	0	NA	NA	NA
I_1797102	I	1797102	value	0.364503590873596	3.98881749469276	0	NA	NA	NA
I_1797777	I	1797777	value	0.0742201771796034	3.98881749469276	0	NA	NA	NA
I_1798439	I	1798439	value	0.111929054865514	3.98881749469276	0	NA	NA	NA
I_1798458	I	1798458	value	0.241769065603643	3.98881749469276	0	NA	NA	NA
I_1798784	I	1798784	value	0.381049778652472	3.98881749469276	0	NA	NA	NA
I_1800051	I	1800051	value	0.0367443057365743	3.98881749469276	0	NA	NA	NA
I_1800531	I	1800531	value	0.174902735310263	3.98881749469276	0	NA	NA	NA
I_1801554	I	1801554	value	0.0938480403615762	3.98881749469276	0	NA	NA	NA
I_1805583	I	1805583	value	0.229079161685964	3.98881749469276	0	NA	NA	NA
I_1805726	I	1805726	value	0.583024207609706	3.98881749469276	0	NA	NA	NA
I_1806009	I	1806009	value	0.463808095144288	3.98881749469276	0	NA	NA	NA
I_1806024	I	1806024	value	0.593803128697518	3.98881749469276	0	NA	NA	NA
I_1807431	I	1807431	value	0.92342240116485	3.98881749469276	0	NA	NA	NA
I_1807725	I	1807725	value	0.227346999125303	3.98881749469276	0	NA	NA	NA
I_1807729	I	1807729	value	0.379278116596477	3.98881749469276	0	NA	NA	NA
I_1808883	I	1808883	value	0.00346232897512151	3.98881749469276	0	NA	NA	NA
I_1809259	I	1809259	value	0.241769065603643	3.98881749469276	0	NA	NA	NA
I_1810184	I	1810184	value	0.272353127490629	3.98881749469276	0	NA	NA	NA
I_1810726	I	1810726	value	0.336657299954994	3.98881749469276	0	NA	NA	NA
I_1810904	I	1810904	value	0.0676750020794923	3.98881749469276	0	NA	NA	NA
I_1810986	I	1810986	value	0.154976646555962	3.98881749469276	0	NA	NA	NA
I_1814518	I	1814518	value	0.579896940361125	3.98881749469276	0	NA	NA	NA
I_1814589	I	1814589	value	0.301403280838972	3.98881749469276	0	NA	NA	NA
I_1814832	I	1814832	value	0.412991083543519	3.98881749469276	0	NA	NA	NA
I_1815684	I	1815684	value	0.326108615159242	3.98881749469276	0	NA	NA	NA
I_1816355	I	1816355	value	0.688104828096014	3.98881749469276	0	NA	NA	NA
I_1816651	I	1816651	value	0.297293512792232	3.98881749469276	0	NA	NA	NA
I_1817047	I	1817047	value	0.463808095144288	3.98881749469276	0	NA	NA	NA
I_1817695	I	1817695	value	0.241769065603643	3.98881749469276	0	NA	NA	NA
I_1817872	I	1817872	value	0.272353127490629	3.98881749469276	0	NA	NA	NA
I_1818743	I	1818743	value	0.2188501357618	3.98881749469276	0	NA	NA	NA
I_1819404	I	1819404	value	0.0596001229063461	3.98881749469276	0	NA	NA	NA
I_1819922	I	1819922	value	0.154976646555962	3.98881749469276	0	NA	NA	NA
I_1823018	I	1823018	value	0.255501693424495	3.98881749469276	0	NA	NA	NA
I_1825148	I	1825148	value	0.161562715976014	3.98881749469276	0	NA	NA	NA
I_1825177	I	1825177	value	0.032472414181135	3.98881749469276	0	NA	NA	NA
I_1828981	I	1828981	value	0.241769065603643	3.98881749469276	0	NA	NA	NA
I_1830167	I	1830167	value	0.463808095144288	3.98881749469276	0	NA	NA	NA
I_1830282	I	1830282	value	0.0672260043283755	3.98881749469276	0	NA	NA	NA
I_1830866	I	1830866	value	0.167065276969083	3.98881749469276	0	NA	NA	NA
I_1831796	I	1831796	value	0.272412199219204	3.98881749469276	0	NA	NA	NA
I_1832760	I	1832760	value	0.154976646555962	3.98881749469276	0	NA	NA	NA
I_1836455	I	1836455	value	0.219815543538252	3.98881749469276	0	NA	NA	NA
I_1836638	I	1836638	value	0.250585024357289	3.98881749469276	0	NA	NA	NA
I_1838364	I	1838364	value	0.23194563302507	3.98881749469276	0	NA	NA	NA
I_1840217	I	1840217	value	0.463808095144288	3.98881749469276	0	NA	NA	NA
I_1840800	I	1840800	value	0.194663147901872	3.98881749469276	0	NA	NA	NA
I_1841116	I	1841116	value	0.241769065603643	3.98881749469276	0	NA	NA	NA
I_1842186	I	1842186	value	0.217386575041007	3.98881749469276	0	NA	NA	NA
I_1844462	I	1844462	value	0.154976646555962	3.98881749469276	0	NA	NA	NA
I_1845174	I	1845174	value	0.106398988587869	3.98881749469276	0	NA	NA	NA
I_1848536	I	1848536	value	0.688104828096014	3.98881749469276	0	NA	NA	NA
I_1850840	I	1850840	value	0.463808095144288	3.98881749469276	0	NA	NA	NA
I_1852231	I	1852231	value	0.455903022279036	3.98881749469276	0	NA	NA	NA
I_1856232	I	1856232	value	0.0070775129273668	3.98881749469276	0	NA	NA	NA
I_1856751	I	1856751	value	0.313267163341293	3.98881749469276	0	NA	NA	NA
I_1856961	I	1856961	value	0.109809204515383	3.98881749469276	0	NA	NA	NA
I_1856971	I	1856971	value	0.0434682973397947	3.98881749469276	0	NA	NA	NA
I_1857126	I	1857126	value	0.485694205216517	3.98881749469276	0	NA	NA	NA
I_1858273	I	1858273	value	0.16300690276911	3.98881749469276	0	NA	NA	NA
I_1859641	I	1859641	value	0.0261018220805158	3.98881749469276	0	NA	NA	NA
I_1860922	I	1860922	value	0.0176347065747434	3.98881749469276	0	NA	NA	NA
I_1861201	I	1861201	value	0.26652061778829	3.98881749469276	0	NA	NA	NA
I_1861457	I	1861457	value	0.173578536568551	3.98881749469276	0	NA	NA	NA
I_1861893	I	1861893	value	0.2188501357618	3.98881749469276	0	NA	NA	NA
I_1861912	I	1861912	value	0.330550316656054	3.98881749469276	0	NA	NA	NA
I_1862460	I	1862460	value	0.0219832042617974	3.98881749469276	0	NA	NA	NA
I_1862478	I	1862478	value	0.463808095144288	3.98881749469276	0	NA	NA	NA
I_1863902	I	1863902	value	0.313267163341293	3.98881749469276	0	NA	NA	NA
I_1863955	I	1863955	value	0.269532367540574	3.98881749469276	0	NA	NA	NA
I_1863956	I	1863956	value	0.059301916648483	3.98881749469276	0	NA	NA	NA
I_1863957	I	1863957	value	0.0328337393857605	3.98881749469276	0	NA	NA	NA
I_1864169	I	1864169	value	0.311311349505188	3.98881749469276	0	NA	NA	NA
I_1864807	I	1864807	value	0.676508109990325	3.98881749469276	0	NA	NA	NA
I_1865931	I	1865931	value	0.744339221012174	3.98881749469276	0	NA	NA	NA
I_1866212	I	1866212	value	0.683766544867985	3.98881749469276	0	NA	NA	NA
I_1867224	I	1867224	value	0.16300690276911	3.98881749469276	0	NA	NA	NA
I_1867368	I	1867368	value	0.26652061778829	3.98881749469276	0	NA	NA	NA
I_1868560	I	1868560	value	0.322156165952762	3.98881749469276	0	NA	NA	NA
I_1868769	I	1868769	value	0.452319146929334	3.98881749469276	0	NA	NA	NA
I_1868943	I	1868943	value	0.553446569713676	3.98881749469276	0	NA	NA	NA
I_1869051	I	1869051	value	0.330550316656054	3.98881749469276	0	NA	NA	NA
I_1869376	I	1869376	value	0.181147798487968	3.98881749469276	0	NA	NA	NA
I_1869486	I	1869486	value	0.0736123926776487	3.98881749469276	0	NA	NA	NA
I_1869492	I	1869492	value	0.417239658077605	3.98881749469276	0	NA	NA	NA
I_1869832	I	1869832	value	0.264271956381607	3.98881749469276	0	NA	NA	NA
I_1870043	I	1870043	value	0.25949180572447	3.98881749469276	0	NA	NA	NA
I_1870113	I	1870113	value	0.430494673717613	3.98881749469276	0	NA	NA	NA
I_1870569	I	1870569	value	0.915657426489076	3.98881749469276	0	NA	NA	NA
I_1871525	I	1871525	value	0.219864374419838	3.98881749469276	0	NA	NA	NA
I_1871847	I	1871847	value	0.261294300040439	3.98881749469276	0	NA	NA	NA
I_1872617	I	1872617	value	0.12204356934687	3.98881749469276	0	NA	NA	NA
I_1872627	I	1872627	value	0.511090392894358	3.98881749469276	0	NA	NA	NA
I_1872974	I	1872974	value	0.550815935462249	3.98881749469276	0	NA	NA	NA
I_1873121	I	1873121	value	0.114389416172729	3.98881749469276	0	NA	NA	NA
I_1873373	I	1873373	value	0.443100707582181	3.98881749469276	0	NA	NA	NA
I_1874558	I	1874558	value	0.0761993473289349	3.98881749469276	0	NA	NA	NA
I_1875698	I	1875698	value	0.322156165952762	3.98881749469276	0	NA	NA	NA
I_1875823	I	1875823	value	0.099213168075457	3.98881749469276	0	NA	NA	NA
I_1876789	I	1876789	value	0.252387383063241	3.98881749469276	0	NA	NA	NA
I_1876965	I	1876965	value	0.264271956381607	3.98881749469276	0	NA	NA	NA
I_1877078	I	1877078	value	0.292958630454663	3.98881749469276	0	NA	NA	NA
I_1880367	I	1880367	value	0.330550316656054	3.98881749469276	0	NA	NA	NA
I_1880625	I	1880625	value	0.0605113504155068	3.98881749469276	0	NA	NA	NA
I_1882333	I	1882333	value	0.00767109291867245	3.98881749469276	0	NA	NA	NA
I_1882860	I	1882860	value	0.273044896891987	3.98881749469276	0	NA	NA	NA
I_1882969	I	1882969	value	0.726168175956602	3.98881749469276	0	NA	NA	NA
I_1882987	I	1882987	value	1.00038806890008	3.98881749469276	0	NA	NA	NA
I_1883109	I	1883109	value	0.478461145830667	3.98881749469276	0	NA	NA	NA
I_1883156	I	1883156	value	0.19033557944793	3.98881749469276	0	NA	NA	NA
I_1883217	I	1883217	value	0.292958630454663	3.98881749469276	0	NA	NA	NA
I_1883323	I	1883323	value	0.175136731117666	3.98881749469276	0	NA	NA	NA
I_1883531	I	1883531	value	0.00916954401343081	3.98881749469276	0	NA	NA	NA
I_1883618	I	1883618	value	0.264271956381607	3.98881749469276	0	NA	NA	NA
I_1886423	I	1886423	value	0.189515912925213	3.98881749469276	0	NA	NA	NA
I_1886763	I	1886763	value	0.41879383816349	3.98881749469276	0	NA	NA	NA
I_1886991	I	1886991	value	0.529745490796577	3.98881749469276	0	NA	NA	NA
I_1891987	I	1891987	value	0.546036894231549	3.98881749469276	0	NA	NA	NA
I_1892869	I	1892869	value	0.658048145277148	3.98881749469276	0	NA	NA	NA
I_1893466	I	1893466	value	0.2188501357618	3.98881749469276	0	NA	NA	NA
I_1893520	I	1893520	value	0.479977836380543	3.98881749469276	0	NA	NA	NA
I_1893866	I	1893866	value	0.264271956381607	3.98881749469276	0	NA	NA	NA
I_1894678	I	1894678	value	0.322156165952762	3.98881749469276	0	NA	NA	NA
I_1895716	I	1895716	value	0.214040824182817	3.98881749469276	0	NA	NA	NA
I_1897407	I	1897407	value	0.815704966680193	3.98881749469276	0	NA	NA	NA
I_1897669	I	1897669	value	1.19875302508655	3.98881749469276	0	NA	NA	NA
I_1898030	I	1898030	value	0.0256303266994909	3.98881749469276	0	NA	NA	NA
I_1898825	I	1898825	value	0.259014837479226	3.98881749469276	0	NA	NA	NA
I_1898880	I	1898880	value	0.292958630454663	3.98881749469276	0	NA	NA	NA
I_1899619	I	1899619	value	0.248384402636425	3.98881749469276	0	NA	NA	NA
I_1899696	I	1899696	value	2.54723130730965	3.98881749469276	0	NA	NA	NA
I_1900286	I	1900286	value	0.216570485089754	3.98881749469276	0	NA	NA	NA
I_1901027	I	1901027	value	0.492622695396192	3.98881749469276	0	NA	NA	NA
I_1901867	I	1901867	value	0.511090392894358	3.98881749469276	0	NA	NA	NA
I_1901908	I	1901908	value	0.173773697906222	3.98881749469276	0	NA	NA	NA
I_1902250	I	1902250	value	0.00916954401343081	3.98881749469276	0	NA	NA	NA
I_1902266	I	1902266	value	0.264271956381607	3.98881749469276	0	NA	NA	NA
I_1902516	I	1902516	value	0.23194563302507	3.98881749469276	0	NA	NA	NA
I_1903048	I	1903048	value	0.72191195730169	3.98881749469276	0	NA	NA	NA
I_1903061	I	1903061	value	0.291016154367448	3.98881749469276	0	NA	NA	NA
I_1903091	I	1903091	value	0.274486123095522	3.98881749469276	0	NA	NA	NA
I_1903189	I	1903189	value	0.0762210677316632	3.98881749469276	0	NA	NA	NA
I_1903325	I	1903325	value	0.672189413326733	3.98881749469276	0	NA	NA	NA
I_1903346	I	1903346	value	1.99067600950709	3.98881749469276	0	NA	NA	NA
I_1903578	I	1903578	value	1.20941848170584	3.98881749469276	0	NA	NA	NA
I_1903662	I	1903662	value	1.56639618379909	3.98881749469276	0	NA	NA	NA
I_1903777	I	1903777	value	0.223614147224858	3.98881749469276	0	NA	NA	NA
I_1904551	I	1904551	value	0.183842614887507	3.98881749469276	0	NA	NA	NA
I_1904656	I	1904656	value	0.292958630454663	3.98881749469276	0	NA	NA	NA
I_1904735	I	1904735	value	0.194104137128053	3.98881749469276	0	NA	NA	NA
I_1904970	I	1904970	value	0.515748406669909	3.98881749469276	0	NA	NA	NA
I_1905014	I	1905014	value	0.335779250967339	3.98881749469276	0	NA	NA	NA
I_1905078	I	1905078	value	0.181147798487968	3.98881749469276	0	NA	NA	NA
I_1905150	I	1905150	value	0.0917950139394595	3.98881749469276	0	NA	NA	NA
I_1905303	I	1905303	value	0.502854960515433	3.98881749469276	0	NA	NA	NA
I_1905411	I	1905411	value	0.291016154367448	3.98881749469276	0	NA	NA	NA
I_1905840	I	1905840	value	0.355818234194543	3.98881749469276	0	NA	NA	NA
I_1905967	I	1905967	value	0.737355959577136	3.98881749469276	0	NA	NA	NA
I_1905968	I	1905968	value	0.155793383110324	3.98881749469276	0	NA	NA	NA
I_1906844	I	1906844	value	0.206104040954168	3.98881749469276	0	NA	NA	NA
I_1907014	I	1907014	value	0.284841366086092	3.98881749469276	0	NA	NA	NA
I_1907088	I	1907088	value	0.27387951919109	3.98881749469276	0	NA	NA	NA
I_1907334	I	1907334	value	0.725545908815828	3.98881749469276	0	NA	NA	NA
I_1907502	I	1907502	value	0.167374353919227	3.98881749469276	0	NA	NA	NA
I_1907521	I	1907521	value	0.422420290492213	3.98881749469276	0	NA	NA	NA
I_1907593	I	1907593	value	0.560498206013152	3.98881749469276	0	NA	NA	NA
I_1907670	I	1907670	value	0.183842614887507	3.98881749469276	0	NA	NA	NA
I_1907896	I	1907896	value	0.292958630454663	3.98881749469276	0	NA	NA	NA
I_1908086	I	1908086	value	0.618197228578461	3.98881749469276	0	NA	NA	NA
I_1908195	I	1908195	value	0.641845266440154	3.98881749469276	0	NA	NA	NA
I_1908737	I	1908737	value	1.21735883665115	3.98881749469276	0	NA	NA	NA
I_1908766	I	1908766	value	0.453362197124887	3.98881749469276	0	NA	NA	NA
I_1908913	I	1908913	value	1.83454758034083	3.98881749469276	0	NA	NA	NA
I_1908980	I	1908980	value	1.06699008329633	3.98881749469276	0	NA	NA	NA
I_1909058	I	1909058	value	0.945904725001151	3.98881749469276	0	NA	NA	NA
I_1909298	I	1909298	value	0.906598798387545	3.98881749469276	0	NA	NA	NA
I_1909486	I	1909486	value	0.515748406669909	3.98881749469276	0	NA	NA	NA
I_1909716	I	1909716	value	0.317061829926006	3.98881749469276	0	NA	NA	NA
I_1910108	I	1910108	value	0.226644285172752	3.98881749469276	0	NA	NA	NA
I_1910668	I	1910668	value	0.00469852081645392	3.98881749469276	0	NA	NA	NA
I_1910756	I	1910756	value	0.258630592378112	3.98881749469276	0	NA	NA	NA
I_1911125	I	1911125	value	0.304735952484279	3.98881749469276	0	NA	NA	NA
I_1911370	I	1911370	value	0.185702989611879	3.98881749469276	0	NA	NA	NA
I_1912674	I	1912674	value	0.428460963173804	3.98881749469276	0	NA	NA	NA
I_1913196	I	1913196	value	0.203049049283802	3.98881749469276	0	NA	NA	NA
I_1915076	I	1915076	value	0.577882045415539	3.98881749469276	0	NA	NA	NA
I_1915518	I	1915518	value	0.267139760146013	3.98881749469276	0	NA	NA	NA
I_1916382	I	1916382	value	0.0375657996874888	3.98881749469276	0	NA	NA	NA
I_1916420	I	1916420	value	0.0244099744486505	3.98881749469276	0	NA	NA	NA
I_1918298	I	1918298	value	0.258438183480077	3.98881749469276	0	NA	NA	NA
I_1918526	I	1918526	value	0.927020040171563	3.98881749469276	0	NA	NA	NA
I_1919007	I	1919007	value	0.375636639691123	3.98881749469276	0	NA	NA	NA
I_1919348	I	1919348	value	0.0244099744486505	3.98881749469276	0	NA	NA	NA
I_1919458	I	1919458	value	0.516433942099755	3.98881749469276	0	NA	NA	NA
I_1919909	I	1919909	value	0.0947330701097609	3.98881749469276	0	NA	NA	NA
I_1919920	I	1919920	value	1.6700710190075	3.98881749469276	0	NA	NA	NA
I_1920046	I	1920046	value	0.519495567000771	3.98881749469276	0	NA	NA	NA
I_1920063	I	1920063	value	1.16719728636343	3.98881749469276	0	NA	NA	NA
I_1923224	I	1923224	value	0.27237656456009	3.98881749469276	0	NA	NA	NA
I_1923661	I	1923661	value	0.0761993473289349	3.98881749469276	0	NA	NA	NA
I_1924276	I	1924276	value	0.861173146838086	3.98881749469276	0	NA	NA	NA
I_1924626	I	1924626	value	0.51703101463757	3.98881749469276	0	NA	NA	NA
I_1924739	I	1924739	value	0.516433942099755	3.98881749469276	0	NA	NA	NA
I_1924938	I	1924938	value	0.496448701766568	3.98881749469276	0	NA	NA	NA
I_1925630	I	1925630	value	0.741924647714859	3.98881749469276	0	NA	NA	NA
I_1926395	I	1926395	value	0.212202574748373	3.98881749469276	0	NA	NA	NA
I_1926561	I	1926561	value	2.59186043412318	3.98881749469276	0	NA	NA	NA
I_1927183	I	1927183	value	0.460050598213168	3.98881749469276	0	NA	NA	NA
I_1927587	I	1927587	value	0.554212047711775	3.98881749469276	0	NA	NA	NA
I_1927761	I	1927761	value	0.0165263752542175	3.98881749469276	0	NA	NA	NA
I_1928125	I	1928125	value	0.232818707662635	3.98881749469276	0	NA	NA	NA
I_1928793	I	1928793	value	0.228125078480267	3.98881749469276	0	NA	NA	NA
I_1929108	I	1929108	value	0.334581992906923	3.98881749469276	0	NA	NA	NA
I_1929119	I	1929119	value	1.41103615386972	3.98881749469276	0	NA	NA	NA
I_1929146	I	1929146	value	0.0375657996874888	3.98881749469276	0	NA	NA	NA
I_1930119	I	1930119	value	0.374748243407991	3.98881749469276	0	NA	NA	NA
I_1930139	I	1930139	value	0.014513526297542	3.98881749469276	0	NA	NA	NA
I_1930165	I	1930165	value	0.874728585138981	3.98881749469276	0	NA	NA	NA
I_1930175	I	1930175	value	0.0125170444822527	3.98881749469276	0	NA	NA	NA
I_1930386	I	1930386	value	0.248939993295951	3.98881749469276	0	NA	NA	NA
I_1931475	I	1931475	value	0.196189565016126	3.98881749469276	0	NA	NA	NA
I_1931583	I	1931583	value	0.994077236743165	3.98881749469276	0	NA	NA	NA
I_1931734	I	1931734	value	0.228125078480267	3.98881749469276	0	NA	NA	NA
I_1932062	I	1932062	value	0.599121558666426	3.98881749469276	0	NA	NA	NA
I_1932341	I	1932341	value	0.0165263752542175	3.98881749469276	0	NA	NA	NA
I_1932460	I	1932460	value	0.616655314142316	3.98881749469276	0	NA	NA	NA
I_1932527	I	1932527	value	0.382094346872454	3.98881749469276	0	NA	NA	NA
I_1932975	I	1932975	value	0.207904335623871	3.98881749469276	0	NA	NA	NA
I_1933111	I	1933111	value	0.00574296225599736	3.98881749469276	0	NA	NA	NA
I_1933135	I	1933135	value	0.0646879102936776	3.98881749469276	0	NA	NA	NA
I_1933269	I	1933269	value	0.172595723508796	3.98881749469276	0	NA	NA	NA
I_1933463	I	1933463	value	0.262055192225676	3.98881749469276	0	NA	NA	NA
I_1933539	I	1933539	value	0.313999639261256	3.98881749469276	0	NA	NA	NA
I_1937919	I	1937919	value	0.0142892734671782	3.98881749469276	0	NA	NA	NA
I_1938216	I	1938216	value	0.375636639691123	3.98881749469276	0	NA	NA	NA
I_1938599	I	1938599	value	0.232818707662635	3.98881749469276	0	NA	NA	NA
I_1939424	I	1939424	value	0.385011020341213	3.98881749469276	0	NA	NA	NA
I_1940533	I	1940533	value	0.0165263752542175	3.98881749469276	0	NA	NA	NA
I_1941143	I	1941143	value	0.410965969267193	3.98881749469276	0	NA	NA	NA
I_1942588	I	1942588	value	0.548298877299588	3.98881749469276	0	NA	NA	NA
I_1942800	I	1942800	value	0.0375657996874888	3.98881749469276	0	NA	NA	NA
I_1942811	I	1942811	value	0.0761993473289349	3.98881749469276	0	NA	NA	NA
I_1944185	I	1944185	value	0.0262918139991812	3.98881749469276	0	NA	NA	NA
I_1945175	I	1945175	value	0.310531328399173	3.98881749469276	0	NA	NA	NA
I_1945752	I	1945752	value	0.267832193056257	3.98881749469276	0	NA	NA	NA
I_1946770	I	1946770	value	0.258438183480077	3.98881749469276	0	NA	NA	NA
I_1946905	I	1946905	value	0.187795060207126	3.98881749469276	0	NA	NA	NA
I_1947620	I	1947620	value	0.107477287033584	3.98881749469276	0	NA	NA	NA
I_1947740	I	1947740	value	0.41263056409009	3.98881749469276	0	NA	NA	NA
I_1947916	I	1947916	value	0.304733304699688	3.98881749469276	0	NA	NA	NA
I_1948882	I	1948882	value	0.1798578816047	3.98881749469276	0	NA	NA	NA
I_1948905	I	1948905	value	0.329941994412742	3.98881749469276	0	NA	NA	NA
I_1949631	I	1949631	value	0.0375657996874888	3.98881749469276	0	NA	NA	NA
I_1949730	I	1949730	value	0.385011020341213	3.98881749469276	0	NA	NA	NA
I_1949815	I	1949815	value	0.0761993473289349	3.98881749469276	0	NA	NA	NA
I_1950310	I	1950310	value	0.335576571750475	3.98881749469276	0	NA	NA	NA
I_1950339	I	1950339	value	0.110478297750881	3.98881749469276	0	NA	NA	NA
I_1950378	I	1950378	value	0.250717785274464	3.98881749469276	0	NA	NA	NA
I_1950409	I	1950409	value	0.407768125154872	3.98881749469276	0	NA	NA	NA
I_1951095	I	1951095	value	0.0432336635241222	3.98881749469276	0	NA	NA	NA
I_1951623	I	1951623	value	0.269628982372551	3.98881749469276	0	NA	NA	NA
I_1951873	I	1951873	value	0.184426353296195	3.98881749469276	0	NA	NA	NA
I_1953465	I	1953465	value	0.199512465575282	3.98881749469276	0	NA	NA	NA
I_1953812	I	1953812	value	0.230508124407078	3.98881749469276	0	NA	NA	NA
I_1954016	I	1954016	value	0.228125078480267	3.98881749469276	0	NA	NA	NA
I_1954057	I	1954057	value	0.0526843894958196	3.98881749469276	0	NA	NA	NA
I_1954295	I	1954295	value	0.174639242786071	3.98881749469276	0	NA	NA	NA
I_1954352	I	1954352	value	0.292958630454663	3.98881749469276	0	NA	NA	NA
I_1954521	I	1954521	value	0.516433942099755	3.98881749469276	0	NA	NA	NA
I_1954598	I	1954598	value	0.232792286964812	3.98881749469276	0	NA	NA	NA
I_1954778	I	1954778	value	1.01054819919283	3.98881749469276	0	NA	NA	NA
I_1955125	I	1955125	value	1.99274893499397	3.98881749469276	0	NA	NA	NA
I_1955925	I	1955925	value	0.253222305258007	3.98881749469276	0	NA	NA	NA
I_1955956	I	1955956	value	1.44514441725141	3.98881749469276	0	NA	NA	NA
I_1956339	I	1956339	value	0.338773896814546	3.98881749469276	0	NA	NA	NA
I_1956712	I	1956712	value	0.360878454607814	3.98881749469276	0	NA	NA	NA
I_1956752	I	1956752	value	0.520762791744118	3.98881749469276	0	NA	NA	NA
I_1957374	I	1957374	value	0.240445745903695	3.98881749469276	0	NA	NA	NA
I_1957469	I	1957469	value	0.290691263662866	3.98881749469276	0	NA	NA	NA
I_1957490	I	1957490	value	0.789007643755273	3.98881749469276	0	NA	NA	NA
I_1957617	I	1957617	value	0.537608091892894	3.98881749469276	0	NA	NA	NA
I_1957818	I	1957818	value	0.798314179670382	3.98881749469276	0	NA	NA	NA
I_1957976	I	1957976	value	0.026317082835481	3.98881749469276	0	NA	NA	NA
I_1958463	I	1958463	value	0.468682709224725	3.98881749469276	0	NA	NA	NA
I_1959438	I	1959438	value	0.190710445131775	3.98881749469276	0	NA	NA	NA
I_1960091	I	1960091	value	0.235939588888753	3.98881749469276	0	NA	NA	NA
I_1960296	I	1960296	value	0.137266351177431	3.98881749469276	0	NA	NA	NA
I_1960688	I	1960688	value	0.136168492555921	3.98881749469276	0	NA	NA	NA
I_1961271	I	1961271	value	1.33634936037743	3.98881749469276	0	NA	NA	NA
I_1961528	I	1961528	value	0.318663845569225	3.98881749469276	0	NA	NA	NA
I_1961615	I	1961615	value	0.842566083571791	3.98881749469276	0	NA	NA	NA
I_1962190	I	1962190	value	0.0494493133440034	3.98881749469276	0	NA	NA	NA
I_1962220	I	1962220	value	0.272569308180773	3.98881749469276	0	NA	NA	NA
I_1962256	I	1962256	value	0.146721872136308	3.98881749469276	0	NA	NA	NA
I_1962310	I	1962310	value	0.687533420964487	3.98881749469276	0	NA	NA	NA
I_1962460	I	1962460	value	0.537425071554929	3.98881749469276	0	NA	NA	NA
I_1963386	I	1963386	value	0.623579981468784	3.98881749469276	0	NA	NA	NA
I_1964624	I	1964624	value	0.128029957861795	3.98881749469276	0	NA	NA	NA
I_1965073	I	1965073	value	0.037405337796724	3.98881749469276	0	NA	NA	NA
I_1965586	I	1965586	value	0.176716902494004	3.98881749469276	0	NA	NA	NA
I_1965628	I	1965628	value	0.315389352541557	3.98881749469276	0	NA	NA	NA
I_1966020	I	1966020	value	0.984614691098139	3.98881749469276	0	NA	NA	NA
I_1966242	I	1966242	value	0.336445105312415	3.98881749469276	0	NA	NA	NA
I_1966255	I	1966255	value	0.122976613558563	3.98881749469276	0	NA	NA	NA
I_1966354	I	1966354	value	0.137266351177431	3.98881749469276	0	NA	NA	NA
I_1967050	I	1967050	value	0.450111370678581	3.98881749469276	0	NA	NA	NA
I_1967740	I	1967740	value	0.146480793332034	3.98881749469276	0	NA	NA	NA
I_1970473	I	1970473	value	0.369952108302264	3.98881749469276	0	NA	NA	NA
I_1970812	I	1970812	value	0.457022592131608	3.98881749469276	0	NA	NA	NA
I_1970928	I	1970928	value	0.500285231987128	3.98881749469276	0	NA	NA	NA
I_1971023	I	1971023	value	0.105628026695644	3.98881749469276	0	NA	NA	NA
I_1971035	I	1971035	value	0.0115396627991575	3.98881749469276	0	NA	NA	NA
I_1971206	I	1971206	value	0.371066942032882	3.98881749469276	0	NA	NA	NA
I_1971368	I	1971368	value	0.775362625672192	3.98881749469276	0	NA	NA	NA
I_1971624	I	1971624	value	0.196211942550759	3.98881749469276	0	NA	NA	NA
I_1971626	I	1971626	value	0.452497738948127	3.98881749469276	0	NA	NA	NA
I_1971944	I	1971944	value	0.199906904075359	3.98881749469276	0	NA	NA	NA
I_1972037	I	1972037	value	0.319368058372873	3.98881749469276	0	NA	NA	NA
I_1972102	I	1972102	value	0.146480793332034	3.98881749469276	0	NA	NA	NA
I_1973181	I	1973181	value	1.49193097938968	3.98881749469276	0	NA	NA	NA
I_1973289	I	1973289	value	1.5110566634845	3.98881749469276	0	NA	NA	NA
I_1973720	I	1973720	value	0.372527935342615	3.98881749469276	0	NA	NA	NA
I_1974537	I	1974537	value	0.14425255557463	3.98881749469276	0	NA	NA	NA
I_1977236	I	1977236	value	0.917106536249651	3.98881749469276	0	NA	NA	NA
I_1977490	I	1977490	value	0.105628026695644	3.98881749469276	0	NA	NA	NA
I_1977601	I	1977601	value	0.380416701262047	3.98881749469276	0	NA	NA	NA
I_1978169	I	1978169	value	0.369952108302264	3.98881749469276	0	NA	NA	NA
I_1978177	I	1978177	value	0.548460103468001	3.98881749469276	0	NA	NA	NA
I_1978688	I	1978688	value	0.199906904075359	3.98881749469276	0	NA	NA	NA
I_1979206	I	1979206	value	0.192926760598323	3.98881749469276	0	NA	NA	NA
I_1979775	I	1979775	value	0.573079790328576	3.98881749469276	0	NA	NA	NA
I_1979827	I	1979827	value	0.0761535385614595	3.98881749469276	0	NA	NA	NA
I_1980849	I	1980849	value	0.522031407340052	3.98881749469276	0	NA	NA	NA
I_1981952	I	1981952	value	0.508023867407037	3.98881749469276	0	NA	NA	NA
I_1982311	I	1982311	value	0.275082421990211	3.98881749469276	0	NA	NA	NA
I_1982912	I	1982912	value	0.146480793332034	3.98881749469276	0	NA	NA	NA
I_1983171	I	1983171	value	0.0338863866365325	3.98881749469276	0	NA	NA	NA
I_1983758	I	1983758	value	0.599804893870089	3.98881749469276	0	NA	NA	NA
I_1984149	I	1984149	value	0.868139793619028	3.98881749469276	0	NA	NA	NA
I_1984230	I	1984230	value	0.336445105312415	3.98881749469276	0	NA	NA	NA
I_1984412	I	1984412	value	0.105628026695644	3.98881749469276	0	NA	NA	NA
I_1984419	I	1984419	value	0.654485705134541	3.98881749469276	0	NA	NA	NA
I_1984530	I	1984530	value	0.440123951303339	3.98881749469276	0	NA	NA	NA
I_1984658	I	1984658	value	0.255813377456586	3.98881749469276	0	NA	NA	NA
I_1984679	I	1984679	value	0.199401886665669	3.98881749469276	0	NA	NA	NA
I_1985069	I	1985069	value	0.680359773166068	3.98881749469276	0	NA	NA	NA
I_1985978	I	1985978	value	0.196135170492952	3.98881749469276	0	NA	NA	NA
I_1987096	I	1987096	value	0.138449178537939	3.98881749469276	0	NA	NA	NA
I_1987108	I	1987108	value	0.199906904075359	3.98881749469276	0	NA	NA	NA
I_1987425	I	1987425	value	0.122724750848429	3.98881749469276	0	NA	NA	NA
I_1988854	I	1988854	value	0.311493609935483	3.98881749469276	0	NA	NA	NA
I_1988938	I	1988938	value	0.369952108302264	3.98881749469276	0	NA	NA	NA
I_1989067	I	1989067	value	0.566450279820599	3.98881749469276	0	NA	NA	NA
I_1989103	I	1989103	value	0.132251318014605	3.98881749469276	0	NA	NA	NA
I_1989106	I	1989106	value	0.210181517929177	3.98881749469276	0	NA	NA	NA
I_1989254	I	1989254	value	0.977189721779122	3.98881749469276	0	NA	NA	NA
I_1991210	I	1991210	value	0.141924646754216	3.98881749469276	0	NA	NA	NA
I_1991708	I	1991708	value	0.00125274767288377	3.98881749469276	0	NA	NA	NA
I_1991852	I	1991852	value	0.066659027304204	3.98881749469276	0	NA	NA	NA
I_1992767	I	1992767	value	0.526660728240756	3.98881749469276	0	NA	NA	NA
I_1993141	I	1993141	value	0.105628026695644	3.98881749469276	0	NA	NA	NA
I_1993245	I	1993245	value	0.199906904075359	3.98881749469276	0	NA	NA	NA
I_1993587	I	1993587	value	0.26195605493194	3.98881749469276	0	NA	NA	NA
I_1993747	I	1993747	value	1.00056832985812	3.98881749469276	0	NA	NA	NA
I_1993790	I	1993790	value	0.0793832981699346	3.98881749469276	0	NA	NA	NA
I_1994085	I	1994085	value	0.0998036811032487	3.98881749469276	0	NA	NA	NA
I_1994395	I	1994395	value	0.24429280343755	3.98881749469276	0	NA	NA	NA
I_1995017	I	1995017	value	0.0412887732022501	3.98881749469276	0	NA	NA	NA
I_1995166	I	1995166	value	0.491079304515774	3.98881749469276	0	NA	NA	NA
I_1995223	I	1995223	value	0.0326690682902904	3.98881749469276	0	NA	NA	NA
I_1995406	I	1995406	value	0.20910512260078	3.98881749469276	0	NA	NA	NA
I_1996342	I	1996342	value	0.0195392826660048	3.98881749469276	0	NA	NA	NA
I_2001870	I	2001870	value	0.825088979270952	3.98881749469276	0	NA	NA	NA
I_2004405	I	2004405	value	0.99843791248911	3.98881749469276	0	NA	NA	NA
I_2004577	I	2004577	value	0.139491392934517	3.98881749469276	0	NA	NA	NA
I_2004581	I	2004581	value	1.87656620473389	3.98881749469276	0	NA	NA	NA
I_2004609	I	2004609	value	0.257079365268019	3.98881749469276	0	NA	NA	NA
I_2004759	I	2004759	value	0.548989658283309	3.98881749469276	0	NA	NA	NA
I_2004829	I	2004829	value	0.416681051707663	3.98881749469276	0	NA	NA	NA
I_2004909	I	2004909	value	0.428898675750095	3.98881749469276	0	NA	NA	NA
I_2005019	I	2005019	value	0.24429280343755	3.98881749469276	0	NA	NA	NA
I_2005292	I	2005292	value	0.594980731767317	3.98881749469276	0	NA	NA	NA
I_2007053	I	2007053	value	0.0448171952789434	3.98881749469276	0	NA	NA	NA
I_2009926	I	2009926	value	0.0696675428520476	3.98881749469276	0	NA	NA	NA
I_2010106	I	2010106	value	0.42134183386627	3.98881749469276	0	NA	NA	NA
I_2010703	I	2010703	value	0.391947059540502	3.98881749469276	0	NA	NA	NA
I_2011090	I	2011090	value	0.00783464308661812	3.98881749469276	0	NA	NA	NA
I_2012526	I	2012526	value	0.410975381775396	3.98881749469276	0	NA	NA	NA
I_2014547	I	2014547	value	0.357560808948948	3.98881749469276	0	NA	NA	NA
I_2015481	I	2015481	value	0.80345715687581	3.98881749469276	0	NA	NA	NA
I_2015951	I	2015951	value	0.365071026449485	3.98881749469276	0	NA	NA	NA
I_2016007	I	2016007	value	0.0126206761607262	3.98881749469276	0	NA	NA	NA
I_2016094	I	2016094	value	0.2188501357618	3.98881749469276	0	NA	NA	NA
I_2016761	I	2016761	value	0.428898675750095	3.98881749469276	0	NA	NA	NA
I_2016939	I	2016939	value	0.0998036811032487	3.98881749469276	0	NA	NA	NA
I_2018385	I	2018385	value	0.0448171952789434	3.98881749469276	0	NA	NA	NA
I_2022956	I	2022956	value	0.24429280343755	3.98881749469276	0	NA	NA	NA
I_2023238	I	2023238	value	0.281729348304598	3.98881749469276	0	NA	NA	NA
I_2024909	I	2024909	value	0.0696675428520476	3.98881749469276	0	NA	NA	NA
I_2025524	I	2025524	value	0.42134183386627	3.98881749469276	0	NA	NA	NA
I_2026698	I	2026698	value	0.487016744338504	3.98881749469276	0	NA	NA	NA
I_2026730	I	2026730	value	0.00783464308661812	3.98881749469276	0	NA	NA	NA
I_2027245	I	2027245	value	0.900145527848675	3.98881749469276	0	NA	NA	NA
I_2027404	I	2027404	value	0.743389554637749	3.98881749469276	0	NA	NA	NA
I_2029112	I	2029112	value	0.101430267977797	3.98881749469276	0	NA	NA	NA
I_2029345	I	2029345	value	0.564326930942637	3.98881749469276	0	NA	NA	NA
I_2029698	I	2029698	value	0.25476149032438	3.98881749469276	0	NA	NA	NA
I_2030468	I	2030468	value	0.0866360659298595	3.98881749469276	0	NA	NA	NA
I_2030513	I	2030513	value	0.497719019858869	3.98881749469276	0	NA	NA	NA
I_2031205	I	2031205	value	0.291238965783642	3.98881749469276	0	NA	NA	NA
I_2032499	I	2032499	value	0.991656427913207	3.98881749469276	0	NA	NA	NA
I_2033981	I	2033981	value	0.179496269854184	3.98881749469276	0	NA	NA	NA
I_2041171	I	2041171	value	0.497719019858869	3.98881749469276	0	NA	NA	NA
I_2042081	I	2042081	value	0.101430267977797	3.98881749469276	0	NA	NA	NA
I_2042268	I	2042268	value	0.502680002129307	3.98881749469276	0	NA	NA	NA
I_2042966	I	2042966	value	0.291238965783642	3.98881749469276	0	NA	NA	NA
I_2044185	I	2044185	value	0.00125274767288377	3.98881749469276	0	NA	NA	NA
I_2044613	I	2044613	value	0.173785889907079	3.98881749469276	0	NA	NA	NA
I_2045334	I	2045334	value	0.991656427913207	3.98881749469276	0	NA	NA	NA
I_2046313	I	2046313	value	1.16403415597903	3.98881749469276	0	NA	NA	NA
I_2047934	I	2047934	value	0.764335990993974	3.98881749469276	0	NA	NA	NA
I_2054763	I	2054763	value	0.820597864530629	3.98881749469276	0	NA	NA	NA
I_2057453	I	2057453	value	0.101430267977797	3.98881749469276	0	NA	NA	NA
I_2058361	I	2058361	value	0.369952108302264	3.98881749469276	0	NA	NA	NA
I_2059037	I	2059037	value	0.0696675428520476	3.98881749469276	0	NA	NA	NA
I_2060551	I	2060551	value	0.295469760584536	3.98881749469276	0	NA	NA	NA
I_2060555	I	2060555	value	0.0384827094374222	3.98881749469276	0	NA	NA	NA
I_2060672	I	2060672	value	0.047588950309527	3.98881749469276	0	NA	NA	NA
I_2062734	I	2062734	value	0.339952410579481	3.98881749469276	0	NA	NA	NA
I_2063861	I	2063861	value	0.728200858669379	3.98881749469276	0	NA	NA	NA
I_2068791	I	2068791	value	0.594980731767317	3.98881749469276	0	NA	NA	NA
I_2069820	I	2069820	value	0.042906133263944	3.98881749469276	0	NA	NA	NA
I_2074351	I	2074351	value	0.380612976420407	3.98881749469276	0	NA	NA	NA
I_2074677	I	2074677	value	0.0777416232997263	3.98881749469276	0	NA	NA	NA
I_2075197	I	2075197	value	0.51110973947005	3.98881749469276	0	NA	NA	NA
I_2075399	I	2075399	value	0.516137750391634	3.98881749469276	0	NA	NA	NA
I_2075447	I	2075447	value	0.369952108302264	3.98881749469276	0	NA	NA	NA
I_2078640	I	2078640	value	0.728200858669379	3.98881749469276	0	NA	NA	NA
I_2081945	I	2081945	value	0.111398618096615	3.98881749469276	0	NA	NA	NA
I_2082742	I	2082742	value	0.556113739156079	3.98881749469276	0	NA	NA	NA
I_2083226	I	2083226	value	0.551243455090058	3.98881749469276	0	NA	NA	NA
I_2084602	I	2084602	value	0.24429280343755	3.98881749469276	0	NA	NA	NA
I_2085129	I	2085129	value	0.294786396139204	3.98881749469276	0	NA	NA	NA
I_2086252	I	2086252	value	0.116622625119465	3.98881749469276	0	NA	NA	NA
I_2086683	I	2086683	value	0.0866360659298595	3.98881749469276	0	NA	NA	NA
I_2088474	I	2088474	value	0.408685064445413	3.98881749469276	0	NA	NA	NA
I_2089499	I	2089499	value	0.728200858669379	3.98881749469276	0	NA	NA	NA
I_2090527	I	2090527	value	0.042906133263944	3.98881749469276	0	NA	NA	NA
I_2091056	I	2091056	value	0.047588950309527	3.98881749469276	0	NA	NA	NA
I_2091906	I	2091906	value	0.173945472348206	3.98881749469276	0	NA	NA	NA
I_2091971	I	2091971	value	0.611531168650507	3.98881749469276	0	NA	NA	NA
I_2092530	I	2092530	value	0.00387959425532852	3.98881749469276	0	NA	NA	NA
I_2092922	I	2092922	value	0.242693719232501	3.98881749469276	0	NA	NA	NA
I_2093237	I	2093237	value	0.37412189951064	3.98881749469276	0	NA	NA	NA
I_2096262	I	2096262	value	0.339952410579481	3.98881749469276	0	NA	NA	NA
I_2099014	I	2099014	value	0.292391653958812	3.98881749469276	0	NA	NA	NA
I_2099759	I	2099759	value	0.46885433194388	3.98881749469276	0	NA	NA	NA
I_2099861	I	2099861	value	0.0866360659298595	3.98881749469276	0	NA	NA	NA
I_2100440	I	2100440	value	0.291577155977464	3.98881749469276	0	NA	NA	NA
I_2100472	I	2100472	value	0.183696552947962	3.98881749469276	0	NA	NA	NA
I_2100541	I	2100541	value	0.405015248375461	3.98881749469276	0	NA	NA	NA
I_2100737	I	2100737	value	0.0696675428520476	3.98881749469276	0	NA	NA	NA
I_2100840	I	2100840	value	0.416535928115752	3.98881749469276	0	NA	NA	NA
I_2101446	I	2101446	value	0.53640089263848	3.98881749469276	0	NA	NA	NA
I_2101992	I	2101992	value	0.728200858669379	3.98881749469276	0	NA	NA	NA
I_2102058	I	2102058	value	0.226694788392349	3.98881749469276	0	NA	NA	NA
I_2102101	I	2102101	value	0.507812967162233	3.98881749469276	0	NA	NA	NA
I_2102313	I	2102313	value	0.060030837296864	3.98881749469276	0	NA	NA	NA
I_2102496	I	2102496	value	0.502680002129307	3.98881749469276	0	NA	NA	NA
I_2102649	I	2102649	value	0.204881572881166	3.98881749469276	0	NA	NA	NA
I_2103395	I	2103395	value	0.337516866222666	3.98881749469276	0	NA	NA	NA
I_2103850	I	2103850	value	0.443323022077836	3.98881749469276	0	NA	NA	NA
I_2104564	I	2104564	value	0.455142786593919	3.98881749469276	0	NA	NA	NA
I_2104604	I	2104604	value	0.0419878780344655	3.98881749469276	0	NA	NA	NA
I_2104616	I	2104616	value	0.0866360659298595	3.98881749469276	0	NA	NA	NA
I_2106103	I	2106103	value	0.0692299129948724	3.98881749469276	0	NA	NA	NA
I_2106122	I	2106122	value	0.845863377236039	3.98881749469276	0	NA	NA	NA
I_2106144	I	2106144	value	0.735738247929463	3.98881749469276	0	NA	NA	NA
I_2107127	I	2107127	value	0.464008601231354	3.98881749469276	0	NA	NA	NA
I_2107145	I	2107145	value	0.188513119487481	3.98881749469276	0	NA	NA	NA
I_2107860	I	2107860	value	0.101430267977797	3.98881749469276	0	NA	NA	NA
I_2110653	I	2110653	value	0.339952410579481	3.98881749469276	0	NA	NA	NA
I_2111125	I	2111125	value	0.515730158284056	3.98881749469276	0	NA	NA	NA
I_2111986	I	2111986	value	0.0866360659298595	3.98881749469276	0	NA	NA	NA
I_2112011	I	2112011	value	0.258114270791379	3.98881749469276	0	NA	NA	NA
I_2112639	I	2112639	value	0.825600559028938	3.98881749469276	0	NA	NA	NA
I_2114414	I	2114414	value	0.594980731767317	3.98881749469276	0	NA	NA	NA
I_2114803	I	2114803	value	1.01843978292422	3.98881749469276	0	NA	NA	NA
I_2115891	I	2115891	value	0.133876016606921	3.98881749469276	0	NA	NA	NA
I_2116647	I	2116647	value	0.203266040198829	3.98881749469276	0	NA	NA	NA
I_2117007	I	2117007	value	0.37412189951064	3.98881749469276	0	NA	NA	NA
I_2117826	I	2117826	value	0.0658193557967106	3.98881749469276	0	NA	NA	NA
I_2118256	I	2118256	value	0.0726192739843524	3.98881749469276	0	NA	NA	NA
I_2119068	I	2119068	value	0.471458994325168	3.98881749469276	0	NA	NA	NA
I_2119977	I	2119977	value	2.18837110355425	3.98881749469276	0	NA	NA	NA
I_2120118	I	2120118	value	0.728200858669379	3.98881749469276	0	NA	NA	NA
I_2120329	I	2120329	value	0.00125274767288377	3.98881749469276	0	NA	NA	NA
I_2121560	I	2121560	value	0.339952410579481	3.98881749469276	0	NA	NA	NA
I_2122874	I	2122874	value	0.464008601231354	3.98881749469276	0	NA	NA	NA
I_2123771	I	2123771	value	0.0715386222494238	3.98881749469276	0	NA	NA	NA
I_2124261	I	2124261	value	0.171829501720792	3.98881749469276	0	NA	NA	NA
I_2125136	I	2125136	value	0.302944126328035	3.98881749469276	0	NA	NA	NA
I_2125151	I	2125151	value	0.572764098512822	3.98881749469276	0	NA	NA	NA
I_2126567	I	2126567	value	0.143882645221643	3.98881749469276	0	NA	NA	NA
I_2126717	I	2126717	value	1.41174153439098	3.98881749469276	0	NA	NA	NA
I_2127603	I	2127603	value	0.0776134593550125	3.98881749469276	0	NA	NA	NA
I_2128218	I	2128218	value	0.0765216953233249	3.98881749469276	0	NA	NA	NA
I_2128564	I	2128564	value	0.728200858669379	3.98881749469276	0	NA	NA	NA
I_2129085	I	2129085	value	0.155420197202074	3.98881749469276	0	NA	NA	NA
I_2130328	I	2130328	value	0.735520083968171	3.98881749469276	0	NA	NA	NA
I_2130764	I	2130764	value	0.576339432014424	3.98881749469276	0	NA	NA	NA
I_2133538	I	2133538	value	0.416348086197201	3.98881749469276	0	NA	NA	NA
I_2133671	I	2133671	value	0.332032342028542	3.98881749469276	0	NA	NA	NA
I_2134009	I	2134009	value	0.556113739156079	3.98881749469276	0	NA	NA	NA
I_2134499	I	2134499	value	1.02267014418287	3.98881749469276	0	NA	NA	NA
I_2134709	I	2134709	value	0.656614543653355	3.98881749469276	0	NA	NA	NA
I_2134716	I	2134716	value	0.772682441455183	3.98881749469276	0	NA	NA	NA
I_2135152	I	2135152	value	0.149261253393114	3.98881749469276	0	NA	NA	NA
I_2136156	I	2136156	value	0.273864187649686	3.98881749469276	0	NA	NA	NA
I_2136488	I	2136488	value	0.416348086197201	3.98881749469276	0	NA	NA	NA
I_2136520	I	2136520	value	0.00125274767288377	3.98881749469276	0	NA	NA	NA
I_2137012	I	2137012	value	0.000497704936870134	3.98881749469276	0	NA	NA	NA
I_2137484	I	2137484	value	0.454366400366239	3.98881749469276	0	NA	NA	NA
I_2137995	I	2137995	value	0.37117454416151	3.98881749469276	0	NA	NA	NA
I_2138420	I	2138420	value	0.0834330241918238	3.98881749469276	0	NA	NA	NA
I_2139396	I	2139396	value	0.353903590876379	3.98881749469276	0	NA	NA	NA
I_2139408	I	2139408	value	0.229706098731534	3.98881749469276	0	NA	NA	NA
I_2140460	I	2140460	value	0.556113739156079	3.98881749469276	0	NA	NA	NA
I_2140481	I	2140481	value	0.908439927308174	3.98881749469276	0	NA	NA	NA
I_2141310	I	2141310	value	0.247785548036917	3.98881749469276	0	NA	NA	NA
I_2141854	I	2141854	value	0.362044480402789	3.98881749469276	0	NA	NA	NA
I_2142174	I	2142174	value	0.795718604876087	3.98881749469276	0	NA	NA	NA
I_2146633	I	2146633	value	0.12881568566054	3.98881749469276	0	NA	NA	NA
I_2146871	I	2146871	value	0.40084928004795	3.98881749469276	0	NA	NA	NA
I_2146872	I	2146872	value	0.556113739156079	3.98881749469276	0	NA	NA	NA
I_2148229	I	2148229	value	0.771918693914402	3.98881749469276	0	NA	NA	NA
I_2148895	I	2148895	value	0.143882645221643	3.98881749469276	0	NA	NA	NA
I_2149842	I	2149842	value	0.0326460412563947	3.98881749469276	0	NA	NA	NA
I_2149909	I	2149909	value	0.906708379174761	3.98881749469276	0	NA	NA	NA
I_2150365	I	2150365	value	0.0665913167934155	3.98881749469276	0	NA	NA	NA
I_2150422	I	2150422	value	0.769299077774332	3.98881749469276	0	NA	NA	NA
I_2151781	I	2151781	value	0.00371596707102258	3.98881749469276	0	NA	NA	NA
I_2152035	I	2152035	value	0.234592782485971	3.98881749469276	0	NA	NA	NA
I_2152491	I	2152491	value	1.09905932415609	3.98881749469276	0	NA	NA	NA
I_2152600	I	2152600	value	0.37412189951064	3.98881749469276	0	NA	NA	NA
I_2154331	I	2154331	value	0.34651224157989	3.98881749469276	0	NA	NA	NA
I_2154433	I	2154433	value	0.297978212609314	3.98881749469276	0	NA	NA	NA
I_2154440	I	2154440	value	0.71263859285668	3.98881749469276	0	NA	NA	NA
I_2154684	I	2154684	value	0.140909667523031	3.98881749469276	0	NA	NA	NA
I_2154868	I	2154868	value	0.0776134593550125	3.98881749469276	0	NA	NA	NA
I_2155016	I	2155016	value	0.764486596773171	3.98881749469276	0	NA	NA	NA
I_2156093	I	2156093	value	0.497719019858869	3.98881749469276	0	NA	NA	NA
I_2159258	I	2159258	value	0.28342081007948	3.98881749469276	0	NA	NA	NA
I_2159483	I	2159483	value	0.668067947051936	3.98881749469276	0	NA	NA	NA
I_2159681	I	2159681	value	0.109876487167262	3.98881749469276	0	NA	NA	NA
I_2160112	I	2160112	value	0.296710044555896	3.98881749469276	0	NA	NA	NA
I_2160541	I	2160541	value	2.71504560086993	3.98881749469276	0	NA	NA	NA
I_2161362	I	2161362	value	0.311047491672937	3.98881749469276	0	NA	NA	NA
I_2161901	I	2161901	value	0.620698497391528	3.98881749469276	0	NA	NA	NA
I_2162191	I	2162191	value	0.76205347735788	3.98881749469276	0	NA	NA	NA
I_2162382	I	2162382	value	0.325463273653468	3.98881749469276	0	NA	NA	NA
I_2162540	I	2162540	value	0.0455270925702757	3.98881749469276	0	NA	NA	NA
I_2163329	I	2163329	value	0.728200858669379	3.98881749469276	0	NA	NA	NA
I_2163887	I	2163887	value	0.00651348313638393	3.98881749469276	0	NA	NA	NA
I_2163938	I	2163938	value	0.487154975881237	3.98881749469276	0	NA	NA	NA
I_2164096	I	2164096	value	0.543540439226671	3.98881749469276	0	NA	NA	NA
I_2164192	I	2164192	value	0.171202330581255	3.98881749469276	0	NA	NA	NA
I_2164308	I	2164308	value	0.0109506955308431	3.98881749469276	0	NA	NA	NA
I_2164903	I	2164903	value	0.908439927308174	3.98881749469276	0	NA	NA	NA
I_2165423	I	2165423	value	0.556113739156079	3.98881749469276	0	NA	NA	NA
I_2165890	I	2165890	value	0.526622179372377	3.98881749469276	0	NA	NA	NA
I_2166316	I	2166316	value	0.0633504282775408	3.98881749469276	0	NA	NA	NA
I_2166382	I	2166382	value	0.212374798373165	3.98881749469276	0	NA	NA	NA
I_2167862	I	2167862	value	0.637493328179613	3.98881749469276	0	NA	NA	NA
I_2169528	I	2169528	value	0.139491392934517	3.98881749469276	0	NA	NA	NA
I_2170282	I	2170282	value	0.473986383089303	3.98881749469276	0	NA	NA	NA
I_2170698	I	2170698	value	0.869460659612975	3.98881749469276	0	NA	NA	NA
I_2170875	I	2170875	value	0.274978979165308	3.98881749469276	0	NA	NA	NA
I_2172618	I	2172618	value	0.556113739156079	3.98881749469276	0	NA	NA	NA
I_2173300	I	2173300	value	1.30308339000072	3.98881749469276	0	NA	NA	NA
I_2173660	I	2173660	value	0.0365942803002895	3.98881749469276	0	NA	NA	NA
I_2174125	I	2174125	value	0.0614664307772908	3.98881749469276	0	NA	NA	NA
I_2174273	I	2174273	value	0.22830402074407	3.98881749469276	0	NA	NA	NA
I_2174274	I	2174274	value	0.328551317804693	3.98881749469276	0	NA	NA	NA
I_2174548	I	2174548	value	0.751354640857125	3.98881749469276	0	NA	NA	NA
I_2174751	I	2174751	value	1.99894792766865	3.98881749469276	0	NA	NA	NA
I_2175593	I	2175593	value	0.224780034221709	3.98881749469276	0	NA	NA	NA
I_2177606	I	2177606	value	0.262317845133808	3.98881749469276	0	NA	NA	NA
I_2177665	I	2177665	value	0.239295828561658	3.98881749469276	0	NA	NA	NA
I_2177694	I	2177694	value	0.00125274767288377	3.98881749469276	0	NA	NA	NA
I_2177751	I	2177751	value	0.474620569548998	3.98881749469276	0	NA	NA	NA
I_2178875	I	2178875	value	0.339952410579481	3.98881749469276	0	NA	NA	NA
I_2179066	I	2179066	value	0.812030828060496	3.98881749469276	0	NA	NA	NA
I_2179136	I	2179136	value	0.00306262563900011	3.98881749469276	0	NA	NA	NA
I_2179331	I	2179331	value	0.514532231699105	3.98881749469276	0	NA	NA	NA
I_2179585	I	2179585	value	1.49810741971484	3.98881749469276	0	NA	NA	NA
I_2179885	I	2179885	value	0.0591609575810797	3.98881749469276	0	NA	NA	NA
I_2179971	I	2179971	value	1.22788700091976	3.98881749469276	0	NA	NA	NA
I_2179984	I	2179984	value	0.556113739156079	3.98881749469276	0	NA	NA	NA
I_2181288	I	2181288	value	0.40084928004795	3.98881749469276	0	NA	NA	NA
I_2181291	I	2181291	value	0.959155299656931	3.98881749469276	0	NA	NA	NA
I_2182390	I	2182390	value	0.365424907998801	3.98881749469276	0	NA	NA	NA
I_2183003	I	2183003	value	0.487016744338504	3.98881749469276	0	NA	NA	NA
I_2183613	I	2183613	value	0.0866360659298595	3.98881749469276	0	NA	NA	NA
[truncated: 61,782 more rows]
